# Supplementary material for: Metabolome and Transcriptome Analyses Reveal the Differences in the Molecular Mechanisms of Oat Leaves Responding to Salt and Alkali Stress Conditions
Source: MDPI journal article supplement (doi:10.3390/agronomy13061441), 2023-05-23
Supplement: s1 [file s1]

Archive with 13 entries (13 files):
- Supplementary Figure S1.pdf
- Supplementary Figure S2.pdf
- Supplementary Figure S3.pdf
- Supplementary Figure S4.pdf
- Supplementary Figure S5.tif
- Supplementary Figure S6.tif
- Supplementary Table S1.pdf
- Supplementary Table S2.pdf
- Supplementary Table S3.xlsx
- Supplementary Table S4.xlsx
- Supplementary Table S5.pdf
- Supplementary Table S6.xls
- Supplementary Table S7.xlsx
