# Supplementary material for: Metabolome and Transcriptome Analyses Reveal the Differences in the Molecular Mechanisms of Oat Leaves Responding to Salt and Alkali Stress Conditions
Source: MDPI journal article supplement (doi:10.3390/agronomy13061441), 2023-05-23
Supplement: s1 [file s1 › Supplementary Table S1.pdf]

**Supplemental Table S1 The primers used for Rt-qPCR**

| <b>Gene name</b>          | <b>Primer sequence(Sense)</b> | <b>Primer sequence(Antisense)</b> | <b>Amplicon size<br/>(bp)</b> |
|---------------------------|-------------------------------|-----------------------------------|-------------------------------|
| Actin                     | GTAAGGGACATCAAGGAGAAGC        | ACCTCAGGGCAACGGAAC                | 155                           |
| <i>C3H</i>                | AAACCCGTGCAGCAGATTC           | GGGTCGGGACGTAGGATG                | 84                            |
| <i>PIP</i>                | CCCGTCGTCTTCCTCCAC            | CTTCTCAATGTCAGCCACCAG             | 177                           |
| <i>P5CS</i>               | ATGCATCTGGGCACATACCA          | TACAGGGCGTATACATGCACG             | 80                            |
| <i>P5CDh</i>              | TTTCTTGGCTCGGTCGTTT           | TTTATTCCCCATGTAGAGTGCA            | 160                           |
| <i>PBL</i>                | CGTCCACTTATCGTGATGTT          | ACTTGTGACCAGAGCTGCCTA             | 172                           |
| <i>FUM</i>                | GAGCAGTGGTGCCGTGAA            | TACCCATAACCTGAGCACAAAC            | 200                           |
| <i>TRPB</i>               | ACGCCGCTGATGAAGATG            | CCTCCGTCCGTGCAAATT                | 187                           |
| <i>CA4H</i>               | CCTGTTTGCCCCGTTCTG            | ACCGCGTCCATCTCGTCC                | 124                           |
| <i>AADC</i>               | CGCGAGCACCTCCATCTC            | TTCCCGTCCACCAACAGC                | 117                           |
| <i>MLS</i>                | CGGTGTCGGGCATACTGG            | AGCCACGTCGCCTCCTGT                | 185                           |
| <i>PETC</i>               | GAGCAAGAGGGAGACGATGA          | CGTGCGTGTTGAGCCATT                | 182                           |
| <i>CS</i>                 | CCCCGTGCGTTCTTCCAT            | TCCCAGCCTGCCAGTTGA                | 162                           |
| <i>LFNR</i>               | AAGAAGTCGGAGCAATGGAA          | CCTTGATCGCACAAACAAATAA            | 108                           |
| <i>BADH</i>               | TCAGATCCACTGGAAGAAGGTT        | CCACGACAAGAATTATGAAGCA            | 132                           |
| <i>ATP<sub>synB</sub></i> | CGAGTTCCTGCTGCTGATG           | CTCGGAGGCGTCCTTCAC                | 121                           |
| <i>TSA</i>                | GGAAATCAAGCAGGTCACAGA         | CCCCAACTGCCTTACCATT               | 133                           |
