# Supplementary material for: Metabolome and Transcriptome Analyses Reveal the Differences in the Molecular Mechanisms of Oat Leaves Responding to Salt and Alkali Stress Conditions
Source: MDPI journal article supplement (doi:10.3390/agronomy13061441), 2023-05-23
Supplement: s1 [file s1 › Supplementary Table S2.pdf]

Supplementary Table S2 The quality control of transcriptional data

| Sample | Raw reads | Clean reads | Clean base | Error rate(%) | Q20(%) | Q30(%) | GC content(%) |
|--------|-----------|-------------|------------|---------------|--------|--------|---------------|
| CKL1   | 76071472  | 74330888    | 11.15      | 0.02          | 98.4   | 95.16  | 55.46         |
| CKL2   | 90361256  | 89027832    | 13.35      | 0.02          | 98.26  | 94.75  | 55.64         |
| CKL3   | 78435260  | 76676590    | 11.50      | 0.02          | 96.89  | 92.10  | 55.51         |
| JL1    | 73920152  | 71954598    | 10.79      | 0.02          | 96.74  | 91.83  | 54.35         |
| JL2    | 87375902  | 85987864    | 12.90      | 0.02          | 98.17  | 94.54  | 54.86         |
| JL3    | 80569106  | 79159862    | 11.87      | 0.02          | 98.01  | 94.14  | 54.98         |
| YL1    | 76519382  | 74644430    | 11.20      | 0.02          | 96.90  | 92.10  | 54.87         |
| YL2    | 93707000  | 91492828    | 13.72      | 0.02          | 98.27  | 94.82  | 55.33         |
| YL3    | 91536890  | 90047558    | 13.51      | 0.02          | 98.17  | 94.55  | 55.63         |

CKL, oat leaves at control; JL, oat leaves at alkali treatment (40 mmol.L<sup>-1</sup> Na<sub>2</sub>CO<sub>3</sub>:NaHCO<sub>3</sub> = 1:1); YL, oat leaves at salt treatment(120 mmol.L<sup>-1</sup> NaCl:Na<sub>2</sub>SO<sub>4</sub>=1:1); 1, replicate 1; 2, replicate 2; 3, replicate 3.
