# Supplementary material for: Metabolome and Transcriptome Analyses Reveal the Differences in the Molecular Mechanisms of Oat Leaves Responding to Salt and Alkali Stress Conditions
Source: MDPI journal article supplement (doi:10.3390/agronomy13061441), 2023-05-23
Supplement: s1 [file s1 › Supplementary Table S3.xlsx]

## Sheet: Sheet1
Supplementary Table S3 Differentially expressed genes in oat leaves at alkalinity vs ck
ID	CK1L_fpkm	CK2L_fpkm	CK3L_fpkm	J1L_fpkm	J2L_fpkm	J3L_fpkm	CK1L_count	CK2L_count	CK3L_count	J1L_count	J2L_count	J3L_count	FoldChange	log2FoldChange	pvalue	padj	regulated	chr	start	end	strand	gene_name	gene_description	KEGG	NR	Swissprot	Tremble	KOG	GO	Pfam
TRINITY_DN100_c0_g1_i3.path1	11.98	11.66	10.23	3.41	5.18	5.97	278	335	243	73	136	143	0.479	-1.061	0.000195507	0.000826631	down	2D	465849787	465851252	+	TRINITY_DN100_c0_g1_i3	--	--	PREDICTED: ocs element-binding factor 1-like [Brachypodium distachyon]	RecName: Full=bZIP transcription factor 11 {ECO:0000305}; Short=AtbZIP11 {ECO:0000303|PubMed:11906833}; AltName: Full=G-box-binding factor 6 {ECO:0000303|Ref.3}; AltName: Full=bZIP transcription factor ATB2 {ECO:0000303|PubMed:9620274};	SubName: Full=Uncharacterized protein {ECO:0000313|EnsemblPlants:TRIAE_CS42_6BS_TGACv1_513373_AA1639310.1};	--	GO:0005634,nucleus; GO:0003700,DNA-binding transcription factor activity; GO:0046982,protein heterodimerization activity; GO:0043565,sequence-specific DNA binding; GO:0017148,negative regulation of translation; GO:0045893,positive regulation of transcription, DNA-templated; GO:0009744,response to sucrose; GO:0080149,sucrose induced translational repression; GO:0006351,transcription, DNA-templated	bZIP transcription factor
TRINITY_DN10000_c0_g1_i11.path1	0.33	0.9	0.7	0.14	0.12	0.13	10	34	22	4	4	4	0.219	-2.193	0.00335639	0.010622	down	1D	279862057	279865528	-	TRINITY_DN10000_c0_g1_i11	--	K11446 histone demethylase JARID1 [EC:1.14.11.-] | (RefSeq) hypothetical protein (A)	predicted protein [Hordeum vulgare subsp. vulgare]	--	SubName: Full=Predicted protein {ECO:0000313|EMBL:BAK05987.1};	--	--	--
TRINITY_DN100002_c0_g1_i1.path1	4.09	8.25	5	2.44	1.99	1.98	20	50	25	11	11	10	0.407	-1.299	0.0181304	0.0458704	down	4D	296257477	296257785	-	TRINITY_DN100002_c0_g1_i1	--	--	pentatricopeptide repeat-containing protein At2g02980, chloroplastic [Aegilops tauschii subsp. tauschii]	RecName: Full=Pentatricopeptide repeat-containing protein At2g42920, chloroplastic; Flags: Precursor;	SubName: Full=Uncharacterized protein {ECO:0000313|EnsemblPlants:HORVU5Hr1G105080.1};	FOG: PPR repeat	GO:0009507,chloroplast; GO:0043231,intracellular membrane-bounded organelle; GO:0004519,endonuclease activity; GO:0003723,RNA binding; GO:0009451,RNA modification	--
TRINITY_DN100002_c0_g1_i1.path2	5.72	3.63	6.19	1.33	1.08	1.19	28	22	31	6	6	6	0.252	-1.987	0.00163613	0.00563895	down	4A	298640893	298641201	-	TRINITY_DN100002_c0_g1_i1	--	--	pentatricopeptide repeat-containing protein At2g02980, chloroplastic [Aegilops tauschii subsp. tauschii]	RecName: Full=Pentatricopeptide repeat-containing protein At2g42920, chloroplastic; Flags: Precursor;	SubName: Full=Uncharacterized protein {ECO:0000313|EnsemblPlants:HORVU5Hr1G105080.1};	FOG: PPR repeat	GO:0009507,chloroplast; GO:0043231,intracellular membrane-bounded organelle; GO:0004519,endonuclease activity; GO:0003723,RNA binding; GO:0009451,RNA modification	--
TRINITY_DN100008_c0_g1_i1.path1	0	0.2	0.24	1.62	1.1	2.41	0	1	1	6	5	10	12.727	3.67	0.0104407	0.0286003	up	3C	230949793	230950046	+	TRINITY_DN100008_c0_g1_i1	--	--	--	--	--	--	--	--
TRINITY_DN10002_c0_g1_i2.path1	1.03	0.97	0.96	3.24	2.59	2.12	18	21	17	52	51	38	2.928	1.55	0.000261793	0.00107893	up	2D	364308707	364310725	+	TRINITY_DN10002_c0_g1_i2	--	--	uncharacterized protein LOC109765515 isoform X2 [Aegilops tauschii subsp. tauschii]	RecName: Full=Protein MARD1 {ECO:0000303|PubMed:15159630}; AltName: Full=Mediator of ABA-regulated dormancy1 {ECO:0000303|PubMed:15159630}; AltName: Full=Senescence-associated protein SAG102 {ECO:0000303|PubMed:11402199};	SubName: Full=Uncharacterized protein {ECO:0000313|EnsemblPlants:TRIAE_CS42_2BL_TGACv1_129310_AA0377810.1};	--	GO:0010494,cytoplasmic stress granule; GO:0000932,P-body; GO:0046872,metal ion binding; GO:0009737,response to abscisic acid; GO:0010162,seed dormancy process	--
TRINITY_DN100023_c0_g1_i1.path2	6.52	3.92	5	2.91	2.03	1.36	51	38	40	21	18	11	0.441	-1.182	0.0135084	0.0356538	down	Chr00	121978061	121983376	-	TRINITY_DN100023_c0_g1_i1	--	K16616 actin-related protein 8, plant | (RefSeq) LOC109753568; actin-related protein 8 (A)	hypothetical protein LR48_Vigan05g055200 [Vigna angularis]	RecName: Full=Actin-related protein 8; AltName: Full=F-box protein ARP8;	SubName: Full=Uncharacterized protein {ECO:0000313|EMBL:KOM42948.1};	--	GO:0005737,cytoplasm; GO:0005730,nucleolus; GO:0005524,ATP binding	--
TRINITY_DN100025_c0_g1_i1.path1	0	0.43	0	3.18	6.36	3.87	0	2	0	11	27	15	31.121	4.96	8.2431e-05	0.000374075	up	3C	13852871	13853107	+	TRINITY_DN100025_c0_g1_i1	--	--	--	--	--	--	--	--
TRINITY_DN100030_c0_g1_i1.path1	0	0	0	2.49	1.62	0.22	0	0	0	10	8	1	39.083	5.288	0.00236506	0.00781513	up	1D	459944801	459945075	+	TRINITY_DN100030_c0_g1_i1	--	--	--	--	--	--	--	--
TRINITY_DN100047_c0_g1_i1.path1	7.1	7.02	6.49	0	1.01	1.33	31	38	29	0	5	6	0.13	-2.946	3.25609e-05	0.000159122	down	2C	559465425	559465700	+	TRINITY_DN100047_c0_g1_i1	--	--	--	--	--	--	--	--
TRINITY_DN100054_c0_g1_i1.path1	0	0	0	2.39	0.75	1.15	0	0	0	13	5	7	54.091	5.757	0.000237154	0.000985803	up	5A	445846875	445847247	+	TRINITY_DN100054_c0_g1_i1	--	--	--	--	--	--	--	--
TRINITY_DN100057_c0_g1_i1.path1	0.43	0.35	0.7	1.88	1.53	1.67	6	6	10	24	24	24	3.764	1.912	0.00167351	0.00575586	up	6C	291465448	291466324	+	TRINITY_DN100057_c0_g1_i1	--	--	--	--	--	--	--	--
TRINITY_DN10006_c0_g1_i4.path2	5.12	4.09	4.57	11.47	10.92	8.22	172	170	157	355	415	285	2.419	1.275	4.60767e-08	3.42641e-07	up	7A	459833433	459835553	+	TRINITY_DN10006_c0_g1_i4	--	K17398 DNA (cytosine-5)-methyltransferase 3A [EC:2.1.1.37] | (RefSeq) uncharacterized protein LOC109761235 (A)	uncharacterized protein LOC109761235 [Aegilops tauschii subsp. tauschii]	--	SubName: Full=Uncharacterized protein {ECO:0000313|EnsemblPlants:TRIAE_CS42_1AS_TGACv1_019104_AA0060670.4};	--	--	--
TRINITY_DN10007_c0_g1_i1.path1	0.42	0.73	0.58	3.15	1.75	2.7	23	50	33	160	109	154	4.849	2.278	2.25345e-10	2.19856e-09	up	5D	454272555	454276963	-	TRINITY_DN10007_c0_g1_i1	--	K20474 RAD50-interacting protein 1 | (RefSeq) LOC109770198; RINT1-like protein MAG2L (A)	hypothetical protein TRIUR3_14501 [Triticum urartu]	RecName: Full=RINT1-like protein MAG2L {ECO:0000305}; AltName: Full=Protein MAIGO 2 homolog {ECO:0000305}; AltName: Full=Protein MAIGO 2-like {ECO:0000303|PubMed:23025793};	SubName: Full=Uncharacterized protein {ECO:0000313|EnsemblPlants:TRIAE_CS42_2AS_TGACv1_114583_AA0368180.1};	ER to golgi transport protein/RAD50-interacting protein 1	GO:0030142,COPI-coated Golgi to ER transport vesicle; GO:0030134,COPII-coated ER to Golgi transport vesicle; GO:0005783,endoplasmic reticulum; GO:0005789,endoplasmic reticulum membrane; GO:0048193,Golgi vesicle transport; GO:0015031,protein transport	RINT-1 / TIP-1 family
TRINITY_DN10008_c0_g1_i1.path1	47.47	77.91	79.59	130.2	112.8	135.62	1908	3878	3273	4823	5130	5626	2.044	1.031	3.09088e-05	0.000151642	up	6A	317205392	317208843	+	TRINITY_DN10008_c0_g1_i1	--	K16055 trehalose 6-phosphate synthase/phosphatase [EC:2.4.1.15 3.1.3.12] | (RefSeq) probable alpha,alpha-trehalose-phosphate synthase [UDP-forming] 11 (A)	PREDICTED: probable alpha,alpha-trehalose-phosphate synthase [UDP-forming]	RecName: Full=Probable alpha,alpha-trehalose-phosphate synthase [UDP-forming] 9; EC=2.4.1.15; AltName: Full=Trehalose-6-phosphate synthase 9; Short=AtTPS9;	SubName: Full=Uncharacterized protein {ECO:0000313|EMBL:KQK01090.1, ECO:0000313|EnsemblPlants:BRADI3G53790.1};	Trehalose-6-phosphate synthase component TPS1 and related subunits	GO:0005737,cytoplasm; GO:0016791,phosphatase activity; GO:0016757,transferase activity, transferring glycosyl groups; GO:0005992,trehalose biosynthetic process; GO:0070413,trehalose metabolism in response to stress	Glycosyltransferase family 20
TRINITY_DN10008_c0_g1_i1.path2	119.25	182.06	182.58	313.16	228.48	329.86	4768	9016	7470	11541	10338	13614	2.002	1.001	8.41734e-05	0.000381477	up	6C	537283267	537286767	-	TRINITY_DN10008_c0_g1_i1	--	K16055 trehalose 6-phosphate synthase/phosphatase [EC:2.4.1.15 3.1.3.12] | (RefSeq) probable alpha,alpha-trehalose-phosphate synthase [UDP-forming] 11 (A)	PREDICTED: probable alpha,alpha-trehalose-phosphate synthase [UDP-forming]	RecName: Full=Probable alpha,alpha-trehalose-phosphate synthase [UDP-forming] 11; EC=2.4.1.15; AltName: Full=Trehalose-6-phosphate synthase 11; Short=AtTPS11;	SubName: Full=Uncharacterized protein {ECO:0000313|EMBL:KQK01090.1, ECO:0000313|EnsemblPlants:BRADI3G53790.1};	Trehalose-6-phosphate synthase component TPS1 and related subunits	GO:0005829,cytosol; GO:0005739,mitochondrion; GO:0016791,phosphatase activity; GO:0016757,transferase activity, transferring glycosyl groups; GO:0005992,trehalose biosynthetic process; GO:0070413,trehalose metabolism in response to stress	Glycosyltransferase family 20
TRINITY_DN100082_c0_g1_i1.path1	12.18	9.98	7.65	22.47	27.68	31.19	70	71	45	119	180	185	3.037	1.603	2.23848e-07	1.52037e-06	up	4A	420987736	420988098	-	TRINITY_DN100082_c0_g1_i1	--	--	--	--	--	--	--	--
TRINITY_DN100086_c0_g1_i1.path1	9.48	10.02	9.48	1.1	1.69	0.66	84	110	86	9	17	6	0.13	-2.939	7.65514e-12	8.70114e-11	down	3A	215346865	215347424	+	TRINITY_DN100086_c0_g1_i1	--	--	--	--	--	--	--	--
TRINITY_DN100098_c0_g1_i1.path1	60.17	75.53	121	4.26	8.68	7.05	521	810	1072	34	85	63	0.085	-3.554	3.31166e-26	1.10616e-24	down	2D	362958566	362959312	-	TRINITY_DN100098_c0_g1_i1	--	--	chloroplast stem-loop binding protein of 41 kDa a, chloroplastic [Aegilops tauschii subsp. tauschii]	RecName: Full=Chloroplast stem-loop binding protein of 41 kDa a, chloroplastic; Short=CSP41-a; Flags: Precursor;	SubName: Full=Uncharacterized protein {ECO:0000313|EnsemblPlants:TRIAE_CS42_6DS_TGACv1_542615_AA1725380.1};	--	GO:0048046,apoplast; GO:0009507,chloroplast; GO:0009941,chloroplast envelope; GO:0009570,chloroplast stroma; GO:0009534,chloroplast thylakoid; GO:0010287,plastoglobule; GO:0005840,ribosome; GO:0010319,stromule; GO:0009579,thylakoid; GO:0003824,catalytic activity; GO:0050662,coenzyme binding; GO:0008266,poly(U) RNA binding; GO:0019843,rRNA binding; GO:0009658,chloroplast organization; GO:0007623,c…	--
TRINITY_DN100098_c0_g1_i1.path2	44.7	51.75	99.55	1.25	0.71	2.46	387	555	882	10	7	22	0.025	-5.326	6.57539e-34	3.27801e-32	down	2A	376618297	376619021	+	TRINITY_DN100098_c0_g1_i1	--	--	chloroplast stem-loop binding protein of 41 kDa a, chloroplastic [Aegilops tauschii subsp. tauschii]	RecName: Full=Chloroplast stem-loop binding protein of 41 kDa a, chloroplastic; Short=CSP41-a; Flags: Precursor;	SubName: Full=Uncharacterized protein {ECO:0000313|EnsemblPlants:TRIAE_CS42_6DS_TGACv1_542615_AA1725380.1};	--	GO:0048046,apoplast; GO:0009507,chloroplast; GO:0009941,chloroplast envelope; GO:0009570,chloroplast stroma; GO:0009534,chloroplast thylakoid; GO:0010287,plastoglobule; GO:0005840,ribosome; GO:0010319,stromule; GO:0009579,thylakoid; GO:0003824,catalytic activity; GO:0050662,coenzyme binding; GO:0008266,poly(U) RNA binding; GO:0019843,rRNA binding; GO:0009658,chloroplast organization; GO:0007623,c…	--
TRINITY_DN10010_c0_g1_i15.path1	3.76	2.42	2.45	1.16	0.86	1.04	123	98	82	35	32	35	0.39	-1.359	0.000160481	0.000690114	down	5D	248968702	248970878	-	TRINITY_DN10010_c0_g1_i15	--	--	--	--	--	--	--	--
TRINITY_DN100118_c0_g1_i1.path1	0.24	0.39	0.24	3.14	1.7	1.17	1	2	1	12	8	5	7.432	2.894	0.0117609	0.0316775	up	2A	333712006	333712267	+	TRINITY_DN100118_c0_g1_i1	--	--	--	--	--	--	--	--
TRINITY_DN10012_c0_g1_i2.path1	0.46	0.44	0.41	1.17	1.09	1.1	24	29	22	57	65	60	2.836	1.504	6.43356e-05	0.000298146	up	1D	113046943	113050461	+	TRINITY_DN10012_c0_g1_i2	--	--	--	--	--	--	--	--
TRINITY_DN100121_c0_g1_i1.path1	4.55	4.44	4.91	0.78	1.9	0.7	19	23	21	3	9	3	0.267	-1.906	0.0067581	0.0195784	down	1D	296015207	296015470	-	TRINITY_DN100121_c0_g1_i1	--	K14833 nucleolar complex protein 2 | (RefSeq) nucleolar complex protein 2 homolog (A)	PREDICTED: uncharacterized protein LOC109504913 [Elaeis guineensis]	RecName: Full=Uncharacterized mitochondrial protein AtMg00810; AltName: Full=ORF240b;	SubName: Full=Uncharacterized protein {ECO:0000313|EnsemblPlants:TRIAE_CS42_6AL_TGACv1_471511_AA1510150.4};	FOG: Transposon-encoded proteins with TYA, reverse transcriptase, integrase domains in various combinations	GO:0005739,mitochondrion	--
TRINITY_DN100129_c0_g1_i1.path1	0	0	0	9.21	8.89	7	0	0	0	27	32	23	171.033	7.418	1.42667e-08	1.13032e-07	up	4A	375601975	375602175	-	TRINITY_DN100129_c0_g1_i1	--	--	--	--	--	--	--	--
TRINITY_DN100134_c0_g1_i1.path1	1.97	1.44	1.57	9.51	8.86	7.11	11	10	9	49	56	41	5.61	2.488	1.4407e-07	1.0043e-06	up	5D	333891172	333891524	-	TRINITY_DN100134_c0_g1_i1	--	--	--	--	--	--	--	--
TRINITY_DN100134_c0_g1_i1.path2	5.58	5.38	6.86	42.57	36.58	34.87	31	37	39	218	230	200	7.023	2.812	3.04502e-22	7.91866e-21	up	5A	369540948	369541298	-	TRINITY_DN100134_c0_g1_i1	--	--	--	--	--	--	--	--
TRINITY_DN100139_c0_g1_i1.path1	36.15	19.89	30.48	0.69	1.55	0.46	226	154	195	4	11	3	0.034	-4.858	1.89563e-23	5.36404e-22	down	7C	662445148	662445542	+	TRINITY_DN100139_c0_g1_i1	--	--	--	--	--	--	--	--
TRINITY_DN100139_c0_g1_i1.path2	45.92	36.69	58.34	0.69	2.1	5.06	290	287	377	4	15	33	0.064	-3.977	4.37519e-07	2.85682e-06	down	6A	375226147	375226545	+	TRINITY_DN100139_c0_g1_i1	--	--	--	--	--	--	--	--
TRINITY_DN10014_c1_g2_i1.path1	15.76	14.31	14.36	42.08	32.13	25.39	104	117	97	256	240	173	2.44	1.287	8.95901e-07	5.59252e-06	up	3C	31726388	31726804	-	TRINITY_DN10014_c1_g2_i1	--	--	--	--	--	--	--	--
TRINITY_DN100165_c0_g1_i1.path1	2.62	5.6	1.83	7.32	9.77	9.44	14	37	10	36	59	52	2.929	1.551	0.00104925	0.00379213	up	7C	455210685	455212799	-	TRINITY_DN100165_c0_g1_i1	--	K05906 prenylcysteine oxidase / farnesylcysteine lyase [EC:1.8.3.5 1.8.3.6] | (RefSeq) LOC109768343; farnesylcysteine lyase (A)	farnesylcysteine lyase [Aegilops tauschii subsp. tauschii]	RecName: Full=Farnesylcysteine lyase; EC=1.8.3.6; Flags: Precursor;	SubName: Full=Uncharacterized protein {ECO:0000313|EnsemblPlants:HORVU2Hr1G124850.2};	--	GO:0005764,lysosome; GO:0005774,vacuolar membrane; GO:0005773,vacuole; GO:0102149,farnesylcysteine lyase activity; GO:0001735,prenylcysteine oxidase activity; GO:0009738,abscisic acid-activated signaling pathway; GO:0045338,farnesyl diphosphate metabolic process; GO:0030327,prenylated protein catabolic process; GO:0030328,prenylcysteine catabolic process	--
TRINITY_DN100186_c0_g1_i1.path1	21.31	19.49	19.95	7.11	11.69	5.72	166	188	159	51	103	46	0.438	-1.19	8.57861e-05	0.000388109	down	2D	531856931	531857422	+	TRINITY_DN100186_c0_g1_i1	--	--	--	--	--	--	--	--
TRINITY_DN10019_c0_g1_i1.path1	341.3	279.89	303.51	112.1	103.84	90.3	7261	7375	6607	2198	2500	1983	0.362	-1.468	8.82989e-15	1.32626e-13	down	7C	391875201	391893956	+	TRINITY_DN10019_c0_g1_i1	--	--	uncharacterized protein LOC109740940 [Aegilops tauschii subsp. tauschii]	RecName: Full=Protein CONSERVED IN THE GREEN LINEAGE AND DIATOMS 27, chloroplastic {ECO:0000303|PubMed:23043051}; Flags: Precursor;	SubName: Full=Uncharacterized protein {ECO:0000313|EnsemblPlants:TRIAE_CS42_3AL_TGACv1_194465_AA0633580.1};	--	GO:0009507,chloroplast; GO:0016021,integral component of membrane; GO:1990641,response to iron ion starvation	Protein of unknown function (DUF1230)
TRINITY_DN10019_c0_g1_i1.path2	68.78	60.13	61.69	26.47	22.44	17.66	1449	1569	1330	514	535	384	0.38	-1.396	8.65327e-12	9.78074e-11	down	4D	48768921	48772317	+	TRINITY_DN10019_c0_g1_i1	--	--	uncharacterized protein LOC109740940 [Aegilops tauschii subsp. tauschii]	RecName: Full=Protein CONSERVED IN THE GREEN LINEAGE AND DIATOMS 27, chloroplastic {ECO:0000303|PubMed:23043051}; Flags: Precursor;	SubName: Full=Uncharacterized protein {ECO:0000313|EnsemblPlants:TRIAE_CS42_3AL_TGACv1_194465_AA0633580.1};	--	GO:0009507,chloroplast; GO:0016021,integral component of membrane; GO:1990641,response to iron ion starvation	Protein of unknown function (DUF1230)
TRINITY_DN100195_c0_g1_i1.path1	3.16	3.04	2.99	1.22	1.08	0.89	31	37	30	11	12	9	0.378	-1.402	0.00670074	0.0194361	down	Chr00	30186186	30186805	+	TRINITY_DN100195_c0_g1_i1	--	--	--	--	--	--	--	--
TRINITY_DN10020_c0_g1_i2.path1	19.39	21.46	20.39	6.68	8.58	8.49	715	980	769	227	358	323	0.429	-1.223	2.14212e-08	1.66459e-07	down	4A	52682868	52688055	-	TRINITY_DN10020_c0_g1_i2	--	K09835 prolycopene isomerase [EC:5.2.1.13] | (RefSeq) prolycopene isomerase, chloroplastic-like (A)	PREDICTED: prolycopene isomerase, chloroplastic-like isoform X1 [Brachypodium distachyon]	RecName: Full=Prolycopene isomerase, chloroplastic; Short=CrtISO; EC=5.2.1.13; AltName: Full=Carotenoid isomerase; Flags: Precursor;	SubName: Full=Uncharacterized protein {ECO:0000313|EMBL:KQK22479.1, ECO:0000313|EnsemblPlants:BRADI1G67480.1};	Phytoene desaturase	GO:0031969,chloroplast membrane; GO:0046608,carotenoid isomerase activity; GO:0016491,oxidoreductase activity; GO:0016117,carotenoid biosynthetic process	Flavin containing amine oxidoreductase
TRINITY_DN10020_c0_g1_i2.path2	4.69	5.47	4.61	2.5	2.13	1.79	173	250	174	85	89	68	0.475	-1.073	3.06392e-05	0.000150426	down	4D	62668694	62673882	-	TRINITY_DN10020_c0_g1_i2	--	K09835 prolycopene isomerase [EC:5.2.1.13] | (RefSeq) LOC109736594; prolycopene isomerase, chloroplastic (A)	prolycopene isomerase, chloroplastic [Aegilops tauschii subsp. tauschii]	RecName: Full=Prolycopene isomerase, chloroplastic; Short=CrtISO; EC=5.2.1.13; AltName: Full=Carotenoid isomerase; Flags: Precursor;	SubName: Full=Uncharacterized protein {ECO:0000313|EnsemblPlants:TRIAE_CS42_1BS_TGACv1_050784_AA0175480.1};	Phytoene desaturase	GO:0031969,chloroplast membrane; GO:0046608,carotenoid isomerase activity; GO:0016491,oxidoreductase activity; GO:0016117,carotenoid biosynthetic process	Flavin containing amine oxidoreductase
TRINITY_DN100213_c0_g1_i1.path1	18.92	22.42	16.4	0.33	2.43	0	62	91	55	1	9	0	0.054	-4.208	1.42026e-10	1.41734e-09	down	1A	362896110	362896316	+	TRINITY_DN100213_c0_g1_i1	--	K03452 magnesium/proton exchanger | (RefSeq) pentatricopeptide repeat-containing protein At3g62890-like (A)	pentatricopeptide repeat-containing protein At1g08070, chloroplastic-like, partial [Aegilops tauschii subsp. tauschii]	RecName: Full=Pentatricopeptide repeat-containing protein At2g45350, chloroplastic; AltName: Full=Protein CHLORORESPIRATORY REDUCTION 4; Flags: Precursor;	SubName: Full=Uncharacterized protein {ECO:0000313|EnsemblPlants:TRIUR3_02851-P1};	FOG: PPR repeat	GO:0009507,chloroplast; GO:0005773,vacuole; GO:0004519,endonuclease activity; GO:0003723,RNA binding; GO:1900865,chloroplast RNA modification; GO:0031425,chloroplast RNA processing; GO:0016556,mRNA modification; GO:0006397,mRNA processing	--
TRINITY_DN100218_c0_g1_i1.path1	0	0	0.55	5.13	2.67	3.48	0	0	3	25	16	19	23.084	4.529	2.37508e-05	0.000118901	up	4D	278465121	278465572	+	TRINITY_DN100218_c0_g1_i1	--	--	--	--	--	--	--	--
TRINITY_DN100218_c0_g1_i1.path2	0	0.15	0.92	1.85	3.84	7.33	0	1	5	9	23	40	13.8	3.787	5.66949e-05	0.000265219	up	Chr00	217876918	217877369	-	TRINITY_DN100218_c0_g1_i1	--	--	--	--	--	--	--	--
TRINITY_DN100220_c0_g1_i1.path1	0	0.12	0.3	2.16	2.43	2.67	0	1	2	13	18	18	18.996	4.248	8.72549e-05	0.000394198	up	6C	408321514	408322019	-	TRINITY_DN100220_c0_g1_i1	--	--	--	--	--	--	--	--
TRINITY_DN100229_c0_g1_i1.path1	1.42	2.79	1.91	4.52	4.38	4.46	16	39	22	47	56	52	2.407	1.267	0.00196476	0.00663408	up	6D	239333221	239333933	+	TRINITY_DN100229_c0_g1_i1	--	--	--	--	--	--	--	--
TRINITY_DN100242_c0_g1_i1.path1	3.78	2.87	3.27	0.59	0.86	0.47	70	66	62	10	18	9	0.211	-2.245	4.65351e-07	3.02561e-06	down	Chr00	16241673	16242843	+	TRINITY_DN100242_c0_g1_i1	--	--	--	--	SubName: Full=Uncharacterized protein {ECO:0000313|EMBL:JAE28257.1};	--	--	--
TRINITY_DN100245_c0_g1_i1.path1	1.68	5.08	2.87	0	1.3	0	8	30	14	0	7	0	0.15	-2.733	0.00928268	0.0258485	down	3C	49510322	49510622	+	TRINITY_DN100245_c0_g1_i1	--	--	--	--	--	--	--	--
TRINITY_DN100258_c0_g1_i1.path2	1.36	2.38	0.44	0.25	0	0	6	13	2	1	0	0	0.064	-3.975	0.0176583	0.044871	down	2D	434402012	434402290	+	TRINITY_DN100258_c0_g1_i1	--	--	--	--	--	--	--	--
TRINITY_DN100259_c0_g1_i1.path1	1.46	2.03	2.66	0.45	0.18	0.41	7	12	13	2	1	2	0.184	-2.443	0.0190894	0.0478596	down	Chr00	97432272	97433072	+	TRINITY_DN100259_c0_g1_i1	--	--	--	--	--	--	--	--
TRINITY_DN100261_c0_g1_i1.path1	6.1	4.51	5.96	0.37	0.9	0.33	36	33	36	2	6	2	0.106	-3.234	2.68285e-06	1.55751e-05	down	6D	275091353	275091725	+	TRINITY_DN100261_c0_g1_i1	--	--	--	--	--	--	--	--
TRINITY_DN100266_c0_g1_i1.path1	36.18	28.62	27.1	3.59	6.65	5.34	197	193	151	18	41	30	0.187	-2.415	3.24575e-13	4.21622e-12	down	4C	295084336	295084679	-	TRINITY_DN100266_c0_g1_i1	--	--	--	--	--	--	--	--
TRINITY_DN100288_c0_g1_i1.path1	0	0	1.33	106.2	192.29	226.12	0	0	7	502	1116	1197	423.858	8.727	1.33026e-07	9.31223e-07	up	7A	5950784	5951107	+	TRINITY_DN100288_c0_g1_i1	--	K22395 cinnamyl-alcohol dehydrogenase [EC:1.1.1.195] | (RAP-DB) Os11g0495950; FAD-linked oxidase, FAD-binding, subdomain 2 domain containing protein. (A)	PREDICTED: reticuline oxidase-like protein [Brachypodium distachyon]	RecName: Full=Berberine bridge enzyme-like 22 {ECO:0000303|PubMed:26037923}; Short=AtBBE-like 22 {ECO:0000303|PubMed:26037923}; EC=1.1.1.- {ECO:0000250|UniProtKB:O64743}; Flags: Precursor;	SubName: Full=Uncharacterized protein {ECO:0000313|EMBL:KQJ83874.1, ECO:0000313|EnsemblPlants:BRADI5G17300.1};	--	GO:0005829,cytosol; GO:0005576,extracellular region; GO:0009505,plant-type cell wall; GO:0050660,flavin adenine dinucleotide binding; GO:0016614,oxidoreductase activity, acting on CH-OH group of donors; GO:0009753,response to jasmonic acid	Berberine and berberine like
TRINITY_DN10029_c0_g1_i2.path1	11.09	15.39	10.27	26.31	27.76	20.48	96	165	91	210	272	183	2.223	1.153	4.23309e-06	2.38957e-05	up	5D	446381704	446382250	+	TRINITY_DN10029_c0_g1_i2	--	K03231 elongation factor 1-alpha | (RefSeq) elongation factor 1-alpha (A)	elongation factor 1-alpha, partial [Deschampsia antarctica]	RecName: Full=Elongation factor 1-alpha; Short=EF-1-alpha;	SubName: Full=Elongation factor 1-alpha-like protein {ECO:0000313|EMBL:ADB28897.1}; Flags: Fragment;	Translation elongation factor EF-1 alpha/Tu	GO:0005737,cytoplasm; GO:0005525,GTP binding; GO:0003924,GTPase activity; GO:0003746,translation elongation factor activity	Elongation factor Tu C-terminal domain
TRINITY_DN10030_c0_g1_i3.path1	0	0.11	0.04	23.28	71.72	42.83	0	3	1	482	1823	993	934.662	9.868	1.3801e-34	7.10849e-33	up	3D	341473214	341476343	-	TRINITY_DN10030_c0_g1_i3	--	K14487 auxin responsive GH3 gene family | (RefSeq) probable indole-3-acetic acid-amido synthetase GH3.2 (A)	PREDICTED: probable indole-3-acetic acid-amido synthetase GH3.2 [Brachypodium distachyon]	RecName: Full=Probable indole-3-acetic acid-amido synthetase GH3.2; EC=6.3.2.-; AltName: Full=Auxin-responsive GH3-like protein 2; Short=OsGH3-2;	SubName: Full=Uncharacterized protein {ECO:0000313|EMBL:KQK09904.1, ECO:0000313|EnsemblPlants:BRADI2G50840.1};	--	GO:0016874,ligase activity; GO:0009733,response to auxin; GO:0009416,response to light stimulus	GH3 auxin-responsive promoter
TRINITY_DN10030_c0_g1_i3.path2	0	0	0	22.96	37.52	50.74	0	0	0	474	951	1173	5483.43	12.421	2.99422e-24	8.88864e-23	up	3A	20722537	20725559	+	TRINITY_DN10030_c0_g1_i3	--	K14487 auxin responsive GH3 gene family | (RAP-DB) Os01g0764800; Similar to Nt-gh3 deduced protein. (A)	hypothetical protein OsJ_03565 [Oryza sativa Japonica Group]	RecName: Full=Probable indole-3-acetic acid-amido synthetase GH3.2; EC=6.3.2.-; AltName: Full=Auxin-responsive GH3-like protein 2; Short=OsGH3-2;	SubName: Full=Uncharacterized protein {ECO:0000313|EMBL:EAZ13648.1};	--	GO:0016874,ligase activity; GO:0009733,response to auxin; GO:0009416,response to light stimulus	GH3 auxin-responsive promoter
TRINITY_DN100306_c0_g1_i1.path1	0	0	0	0.16	0.85	0.07	0	0	0	2	13	1	30.309	4.922	0.00919746	0.0256441	up	7C	695370890	695371747	-	TRINITY_DN100306_c0_g1_i1	--	--	--	--	--	--	--	--
TRINITY_DN100316_c0_g1_i1.path1	0	0	0	1.36	0.48	0.87	0	0	0	7	3	5	32.498	5.022	0.0040636	0.0125601	up	2D	180673329	180673680	+	TRINITY_DN100316_c0_g1_i1	--	--	--	--	--	--	--	--
TRINITY_DN100319_c0_g1_i1.path1	3.22	1.95	1.18	0.22	0.18	0	16	12	6	1	1	0	0.067	-3.896	0.00393515	0.0122056	down	7D	1033068	1033381	-	TRINITY_DN100319_c0_g1_i1	--	--	predicted protein [Hordeum vulgare subsp. vulgare]	--	SubName: Full=Uncharacterized protein {ECO:0000313|EnsemblPlants:TRIAE_CS42_7BL_TGACv1_576945_AA1860690.1};	--	--	--
TRINITY_DN100321_c0_g1_i1.path1	0	0.14	0.33	7	4.2	3.78	0	1	2	38	28	23	34.812	5.122	3.0476e-07	2.03432e-06	up	4A	397705793	397706164	+	TRINITY_DN100321_c0_g1_i1	--	--	--	--	--	--	--	--
TRINITY_DN100327_c0_g1_i1.path1	0.4	0.11	0.26	2.16	1.29	1.41	3	1	2	15	11	11	7.092	2.826	0.00277601	0.00900251	up	5D	440314700	440315175	+	TRINITY_DN100327_c0_g1_i1	--	--	--	--	--	--	--	--
TRINITY_DN100329_c0_g1_i1.path1	48.96	47.73	55.39	11.02	18.31	11.81	241	291	279	50	102	60	0.295	-1.759	2.73329e-10	2.64317e-09	down	7C	476517889	476518199	-	TRINITY_DN100329_c0_g1_i1	--	--	--	--	--	--	--	NinF protein
TRINITY_DN10033_c0_g1_i1.path1	13.1	17.15	19.95	4.64	5.97	5.35	95	154	148	31	49	40	0.349	-1.519	3.97609e-06	2.25295e-05	down	6C	325166634	325167091	+	TRINITY_DN10033_c0_g1_i1	--	--	--	--	--	--	--	--
TRINITY_DN100343_c0_g1_i1.path1	0	0	0	0.62	2.02	0.55	0	0	0	2	8	2	23.584	4.56	0.0185048	0.0466566	up	6C	400653874	400654094	+	TRINITY_DN100343_c0_g1_i1	--	--	--	--	--	--	--	--
TRINITY_DN100353_c0_g1_i1.path1	5.09	3.89	6.54	0	1.42	0	19	18	25	0	6	0	0.102	-3.291	0.000674477	0.00254676	down	4A	356962328	356962563	+	TRINITY_DN100353_c0_g1_i1	--	--	--	--	--	--	--	--
TRINITY_DN100358_c0_g1_i1.path1	2.7	4.36	2.36	19.87	9.41	15.82	19	38	17	129	75	115	5.309	2.408	2.82971e-09	2.4495e-08	up	1C	171325632	171327040	-	TRINITY_DN100358_c0_g1_i1	--	--	--	--	--	--	--	--
TRINITY_DN10037_c0_g1_i6.path1	3.1	4.35	3.34	27.56	18.25	36.97	88	153	97	721	586	1083	8.648	3.112	7.58238e-24	2.19698e-22	up	6C	498347271	498351062	-	TRINITY_DN10037_c0_g1_i6	--	--	hypothetical protein BRADI_3g01690v3 [Brachypodium distachyon]	--	SubName: Full=Uncharacterized protein {ECO:0000313|EMBL:KQJ92935.1};	--	GO:0005524,ATP binding; GO:0004672,protein kinase activity	--
TRINITY_DN10037_c0_g1_i6.path2	2.56	4.71	3.5	47.31	35.21	69.34	73	166	102	1241	1134	2037	15.925	3.993	2.65769e-36	1.49636e-34	up	1A	415960908	415964645	-	TRINITY_DN10037_c0_g1_i6	--	K04733 interleukin-1 receptor-associated kinase 4 [EC:2.7.11.1] | (RefSeq) probable serine/threonine-protein kinase NAK (A)	hypothetical protein BRADI_3g01690v3 [Brachypodium distachyon]	RecName: Full=Probable serine/threonine-protein kinase PIX13 {ECO:0000305}; EC=2.7.11.1 {ECO:0000305};	SubName: Full=Uncharacterized protein {ECO:0000313|EMBL:KQJ92935.1};	Serine/threonine protein kinase	GO:0005634,nucleus; GO:0005886,plasma membrane; GO:0005524,ATP binding; GO:0004675,transmembrane receptor protein serine/threonine kinase activity; GO:0007166,cell surface receptor signaling pathway; GO:0006952,defense response; GO:0006468,protein phosphorylation	Protein tyrosine kinase
TRINITY_DN10037_c0_g2_i1.path2	21.44	24.11	17.77	51.1	37.73	51	112	156	95	246	223	275	2.453	1.295	1.32935e-06	8.09174e-06	up	7A	331427059	331427388	+	TRINITY_DN10037_c0_g2_i1	--	K00521 ferric-chelate reductase [EC:1.16.1.7] | (RefSeq) ferric reduction oxidase 7, chloroplastic-like (A)	PREDICTED: NAC domain-containing protein 53-like [Brachypodium distachyon]	RecName: Full=NAC domain containing protein 50 {ECO:0000303|PubMed:15029955}; Short=ANAC050 {ECO:0000303|PubMed:15029955};	SubName: Full=Uncharacterized protein {ECO:0000313|EMBL:KQJ94670.1, ECO:0000313|EnsemblPlants:BRADI3G12470.1};	--	GO:0005634,nucleus; GO:0003700,DNA-binding transcription factor activity; GO:0043565,sequence-specific DNA binding; GO:0000976,transcription regulatory region sequence-specific DNA binding; GO:0009908,flower development; GO:0034720,histone H3-K4 demethylation; GO:0045892,negative regulation of transcription, DNA-templated; GO:0048573,photoperiodism, flowering; GO:0060966,regulation of gene silenc…	No apical meristem (NAM) protein
TRINITY_DN10037_c1_g1_i1.path1	0.5	1.75	0.65	77.79	94.08	86.46	3	13	4	429	637	534	94.608	6.564	4.34356e-58	5.87927e-56	up	1D	281922273	281922736	-	TRINITY_DN10037_c1_g1_i1	--	K00521 ferric-chelate reductase [EC:1.16.1.7] | (RefSeq) ferric reduction oxidase 7, chloroplastic-like (A)	predicted protein [Hordeum vulgare subsp. vulgare]	RecName: Full=NAC domain-containing protein 48 {ECO:0000303|PubMed:15029955}; Short=ONAC048 {ECO:0000303|PubMed:15029955}; AltName: Full=OsNAC6 {ECO:0000303|PubMed:10660065}; AltName: Full=Protein STRESS-RESPONSIVE NAC 2 {ECO:0000303|PubMed:18273684};	SubName: Full=Predicted protein {ECO:0000313|EMBL:BAJ97015.1};	--	GO:0005634,nucleus; GO:0043565,sequence-specific DNA binding; GO:1901002,positive regulation of response to salt stress; GO:1902584,positive regulation of response to water deprivation; GO:0045893,positive regulation of transcription, DNA-templated; GO:1900150,regulation of defense response to fungus; GO:0040008,regulation of growth; GO:0009409,response to cold; GO:0048364,root development; GO:00…	No apical meristem (NAM) protein
TRINITY_DN10037_c1_g1_i1.path2	1	0.27	0.65	55.49	65.28	55.7	6	2	4	306	442	344	104.536	6.708	7.01516e-44	5.52228e-42	up	1A	289156370	289156833	-	TRINITY_DN10037_c1_g1_i1	--	K00521 ferric-chelate reductase [EC:1.16.1.7] | (RefSeq) ferric reduction oxidase 7, chloroplastic-like (A)	predicted protein [Hordeum vulgare subsp. vulgare]	RecName: Full=NAC domain-containing protein 48 {ECO:0000303|PubMed:15029955}; Short=ONAC048 {ECO:0000303|PubMed:15029955}; AltName: Full=OsNAC6 {ECO:0000303|PubMed:10660065}; AltName: Full=Protein STRESS-RESPONSIVE NAC 2 {ECO:0000303|PubMed:18273684};	SubName: Full=Uncharacterized protein {ECO:0000313|EnsemblPlants:HORVU1Hr1G063740.5};	--	GO:0005634,nucleus; GO:0043565,sequence-specific DNA binding; GO:1901002,positive regulation of response to salt stress; GO:1902584,positive regulation of response to water deprivation; GO:0045893,positive regulation of transcription, DNA-templated; GO:1900150,regulation of defense response to fungus; GO:0040008,regulation of growth; GO:0009409,response to cold; GO:0048364,root development; GO:00…	No apical meristem (NAM) protein
TRINITY_DN10037_c1_g1_i1.path3	9.02	10.8	8.49	288.86	260.67	306.18	54	80	52	1593	1765	1891	33.49	5.066	3.13421e-102	2.11502e-99	up	1C	15873075	15873563	+	TRINITY_DN10037_c1_g1_i1	--	K00521 ferric-chelate reductase [EC:1.16.1.7] | (RefSeq) ferric reduction oxidase 7, chloroplastic-like (A)	predicted protein [Hordeum vulgare subsp. vulgare]	RecName: Full=NAC domain-containing protein 48 {ECO:0000303|PubMed:15029955}; Short=ONAC048 {ECO:0000303|PubMed:15029955}; AltName: Full=OsNAC6 {ECO:0000303|PubMed:10660065}; AltName: Full=Protein STRESS-RESPONSIVE NAC 2 {ECO:0000303|PubMed:18273684};	SubName: Full=Uncharacterized protein {ECO:0000313|EnsemblPlants:HORVU1Hr1G063740.5};	--	GO:0005634,nucleus; GO:0043565,sequence-specific DNA binding; GO:1901002,positive regulation of response to salt stress; GO:1902584,positive regulation of response to water deprivation; GO:0045893,positive regulation of transcription, DNA-templated; GO:1900150,regulation of defense response to fungus; GO:0040008,regulation of growth; GO:0009409,response to cold; GO:0048364,root development; GO:00…	No apical meristem (NAM) protein
TRINITY_DN100376_c0_g1_i1.path1	0	0	0	0.47	2.28	1.46	0	0	0	2	12	7	42.313	5.403	0.00122502	0.00435269	up	6C	604623842	604624135	-	TRINITY_DN100376_c0_g1_i1	--	K10523 speckle-type POZ protein | (RefSeq) BTB/POZ and MATH domain-containing protein 2-like (A)	PREDICTED: BTB/POZ and MATH domain-containing protein 2-like [Brachypodium distachyon]	RecName: Full=BTB/POZ and MATH domain-containing protein 1; AltName: Full=Protein BTB-POZ AND MATH DOMAIN 1; Short=AtBPM1;	SubName: Full=Uncharacterized protein {ECO:0000313|EMBL:KQK17057.1, ECO:0000313|EnsemblPlants:BRADI1G32247.1};	Speckle-type POZ protein SPOP and related proteins with TRAF, MATH and BTB/POZ domains	GO:0005634,nucleus; GO:0042802,identical protein binding; GO:0071472,cellular response to salt stress; GO:0042631,cellular response to water deprivation; GO:0016567,protein ubiquitination; GO:0006970,response to osmotic stress	--
TRINITY_DN100377_c0_g1_i1.path1	5.24	5.32	7.92	0.55	4.18	1.31	31	39	48	3	28	8	0.355	-1.494	0.0148519	0.0386865	down	6C	468801631	468802004	+	TRINITY_DN100377_c0_g1_i1	--	K08237 hydroquinone glucosyltransferase [EC:2.4.1.218] | (RefSeq) LOC109782107; UDP-glycosyltransferase 72B1-like (A)	UDP-glycosyltransferase 72B1 [Dichanthelium oligosanthes]	RecName: Full=UDP-glycosyltransferase 72B1; EC=2.4.1.-; AltName: Full=Arbutin synthase; AltName: Full=Probable hydroquinone glucosyltransferase; EC=2.4.1.218;	RecName: Full=Glycosyltransferase {ECO:0000256|RuleBase:RU362057}; EC=2.4.1.- {ECO:0000256|RuleBase:RU362057};	UDP-glucuronosyl and UDP-glucosyl transferase	GO:0043231,intracellular membrane-bounded organelle; GO:0050505,hydroquinone glucosyltransferase activity; GO:0080043,quercetin 3-O-glucosyltransferase activity; GO:0080044,quercetin 7-O-glucosyltransferase activity; GO:0035251,UDP-glucosyltransferase activity; GO:0008194,UDP-glycosyltransferase activity; GO:0009809,lignin biosynthetic process; GO:0009651,response to salt stress; GO:0009636,respo…	--
TRINITY_DN100377_c0_g1_i1.path2	29.39	31.1	36.48	8.43	5.22	4.09	174	228	221	46	35	25	0.197	-2.341	2.93436e-13	3.82774e-12	down	2D	456275831	456276204	+	TRINITY_DN100377_c0_g1_i1	--	K08237 hydroquinone glucosyltransferase [EC:2.4.1.218] | (RefSeq) LOC109782107; UDP-glycosyltransferase 72B1-like (A)	UDP-glycosyltransferase 72B1-like [Aegilops tauschii subsp. tauschii]	RecName: Full=UDP-glycosyltransferase 72B1; EC=2.4.1.-; AltName: Full=Arbutin synthase; AltName: Full=Probable hydroquinone glucosyltransferase; EC=2.4.1.218;	RecName: Full=Glycosyltransferase {ECO:0000256|RuleBase:RU362057}; EC=2.4.1.- {ECO:0000256|RuleBase:RU362057};	UDP-glucuronosyl and UDP-glucosyl transferase	GO:0043231,intracellular membrane-bounded organelle; GO:0050505,hydroquinone glucosyltransferase activity; GO:0080043,quercetin 3-O-glucosyltransferase activity; GO:0080044,quercetin 7-O-glucosyltransferase activity; GO:0035251,UDP-glucosyltransferase activity; GO:0008194,UDP-glycosyltransferase activity; GO:0009809,lignin biosynthetic process; GO:0009651,response to salt stress; GO:0009636,respo…	--
TRINITY_DN10038_c0_g1_i7.path2	14.23	16.42	20.29	5	10.07	7.31	602	860	878	195	482	319	0.48	-1.059	0.000156705	0.000675086	down	1D	447862852	447867156	+	TRINITY_DN10038_c0_g1_i7	--	K17469 sulfate transporter 2, low-affinity | (RefSeq) LOC109772858; low affinity sulfate transporter 3-like (A)	predicted protein [Hordeum vulgare subsp. vulgare]	RecName: Full=Low affinity sulfate transporter 3;	SubName: Full=Uncharacterized protein {ECO:0000313|EnsemblPlants:TRIAE_CS42_4AS_TGACv1_306580_AA1010500.1};	Sulfate/bicarbonate/oxalate exchanger SAT-1 and related transporters (SLC26 family)	GO:0016021,integral component of membrane; GO:0008271,secondary active sulfate transmembrane transporter activity	Sulfate permease family
TRINITY_DN10039_c0_g1_i1.path1	8.4	5.03	6.08	18.91	17.88	15.68	27	20	20	56	65	52	2.955	1.563	0.000102397	0.000456386	up	1A	177978141	177979688	-	TRINITY_DN10039_c0_g1_i1	--	--	--	--	--	--	--	--
TRINITY_DN100391_c0_g1_i1.path1	10.57	6.07	7.8	30.83	17.02	18.88	45	32	34	121	82	83	2.986	1.578	2.88932e-05	0.000142454	up	6C	353187399	353187667	+	TRINITY_DN100391_c0_g1_i1	--	--	--	--	--	--	--	--
TRINITY_DN100394_c0_g1_i1.path1	1.96	0.74	1.57	0.12	0	0	17	8	14	1	0	0	0.031	-5.022	0.000557397	0.00214379	down	2C	184075464	184076012	-	TRINITY_DN100394_c0_g1_i1	--	--	--	--	--	--	--	--
TRINITY_DN1004_c0_g1_i1.path1	1.71	1.73	1.22	2.2	2.86	3.48	48	60	35	57	91	101	2.053	1.038	0.00346909	0.0109322	up	7C	720999001	721002677	-	TRINITY_DN1004_c0_g1_i1	--	--	--	--	--	--	--	--
TRINITY_DN10040_c0_g1_i6.path1	5.25	5.54	4.54	1.09	2.62	1.17	78	102	69	15	44	18	0.35	-1.517	0.000157129	0.00067681	down	4D	268818185	268819824	+	TRINITY_DN10040_c0_g1_i6	--	K03000 DNA-directed RNA polymerase I subunit RPA12 | (RefSeq) DNA-directed RNA polymerase I subunit RPA12 (A)	DNA-directed RNA polymerase I subunit RPA12 [Sorghum bicolor]	--	RecName: Full=DNA-directed RNA polymerase subunit {ECO:0000256|PIRNR:PIRNR005586};	--	GO:0005730,nucleolus; GO:0003899,DNA-directed 5'-3' RNA polymerase activity; GO:0003676,nucleic acid binding; GO:0008270,zinc ion binding; GO:0006379,mRNA cleavage; GO:0006351,transcription, DNA-templated	--
TRINITY_DN100406_c0_g1_i1.path1	0.45	0.12	1.31	10.99	4.87	9.67	3	1	9	68	37	67	15.281	3.934	1.44913e-09	1.29647e-08	up	6C	313881158	313881581	-	TRINITY_DN100406_c0_g1_i1	--	K00876 uridine kinase [EC:2.7.1.48] | (RAP-DB) Os02g0273000; Similar to Uridine kinase-like protein. (A)	Uridine kinase [Zea mays]	--	SubName: Full=Uridine kinase {ECO:0000313|EMBL:AQK61311.1};	--	GO:0005524,ATP binding; GO:0016301,kinase activity	--
TRINITY_DN100409_c0_g1_i1.path2	0	0.23	0	1.82	3.71	1.62	0	1	0	6	15	6	27.939	4.804	0.00159684	0.00551906	up	1A	526942687	526942912	-	TRINITY_DN100409_c0_g1_i1	--	--	--	--	--	--	--	--
TRINITY_DN10041_c0_g1_i1.path1	0.62	1.4	1.07	3.2	2.06	2.88	25	70	44	119	94	120	2.919	1.545	2.42687e-05	0.000121291	up	5A	415556696	415560968	-	TRINITY_DN10041_c0_g1_i1	--	K12175 COP9 signalosome complex subunit 1 | (RefSeq) probable methyltransferase PMT15 (A)	putative methyltransferase PMT2 [Triticum urartu]	RecName: Full=Probable methyltransferase PMT2; EC=2.1.1.-;	SubName: Full=Uncharacterized protein {ECO:0000313|EnsemblPlants:TRIAE_CS42_5AL_TGACv1_374351_AA1197740.1};	--	GO:0005737,cytoplasm; GO:0005768,endosome; GO:0005794,Golgi apparatus; GO:0000139,Golgi membrane; GO:0016021,integral component of membrane; GO:0016020,membrane; GO:0005802,trans-Golgi network; GO:0008757,S-adenosylmethionine-dependent methyltransferase activity; GO:0032259,methylation	Putative S-adenosyl-L-methionine-dependent methyltransferase
TRINITY_DN10041_c0_g1_i1.path2	0.93	1.5	1.81	3.24	1.86	3.35	37	74	74	119	84	138	2.21	1.144	0.00229568	0.00760965	up	5C	489877807	489956888	+	TRINITY_DN10041_c0_g1_i1	--	K12175 COP9 signalosome complex subunit 1 | (RefSeq) probable methyltransferase PMT15 (A)	putative methyltransferase PMT2 [Triticum urartu]	RecName: Full=Probable methyltransferase PMT2; EC=2.1.1.-;	SubName: Full=Putative methyltransferase PMT2 {ECO:0000313|EMBL:EMS49438.1, ECO:0000313|EnsemblPlants:TRIUR3_16429-P1};	--	GO:0005737,cytoplasm; GO:0005768,endosome; GO:0005794,Golgi apparatus; GO:0000139,Golgi membrane; GO:0016021,integral component of membrane; GO:0016020,membrane; GO:0005802,trans-Golgi network; GO:0008757,S-adenosylmethionine-dependent methyltransferase activity; GO:0032259,methylation	Putative S-adenosyl-L-methionine-dependent methyltransferase
TRINITY_DN10042_c0_g1_i5.path1	4.92	4.98	4.63	1.88	2.31	0.99	275	345	265	97	146	57	0.385	-1.379	9.36604e-07	5.83108e-06	down	5C	466280220	466284994	+	TRINITY_DN10042_c0_g1_i5	--	K01148 poly(A)-specific ribonuclease [EC:3.1.13.4] | (RefSeq) uncharacterized protein LOC100193495 (A)	CRM-domain containing factor CFM3, chloroplastic/mitochondrial-like [Aegilops tauschii subsp. tauschii]	RecName: Full=CRM-domain containing factor CFM3, chloroplastic/mitochondrial {ECO:0000305}; AltName: Full=Protein CRM FAMILY MEMBER 3 {ECO:0000303|PubMed:18799595}; Short=OsCFM3 {ECO:0000303|PubMed:18799595}; Flags: Precursor;	SubName: Full=Uncharacterized protein {ECO:0000313|EnsemblPlants:TRIAE_CS42_5DL_TGACv1_432922_AA1394360.1};	Poly(A)-specific exoribonuclease PARN	GO:0009507,chloroplast; GO:0030529,NA; GO:0005739,mitochondrion; GO:0003723,RNA binding; GO:0000373,Group II intron splicing; GO:0006397,mRNA processing	CRS1 / YhbY (CRM) domain
TRINITY_DN10042_c0_g1_i5.path3	12.19	12.28	9.41	3.46	4.1	2.75	684	853	540	179	260	159	0.333	-1.588	1.98411e-13	2.63206e-12	down	5D	361934936	361939815	+	TRINITY_DN10042_c0_g1_i5	--	K01148 poly(A)-specific ribonuclease [EC:3.1.13.4] | (RefSeq) uncharacterized protein LOC100193495 (A)	CRM-domain containing factor CFM3, chloroplastic/mitochondrial-like [Aegilops tauschii subsp. tauschii]	RecName: Full=CRM-domain containing factor CFM3, chloroplastic/mitochondrial {ECO:0000305}; AltName: Full=Protein CRM FAMILY MEMBER 3 {ECO:0000303|PubMed:18799595}; Short=OsCFM3 {ECO:0000303|PubMed:18799595}; Flags: Precursor;	SubName: Full=Uncharacterized protein {ECO:0000313|EnsemblPlants:TRIAE_CS42_5BL_TGACv1_404624_AA1306520.1};	Poly(A)-specific exoribonuclease PARN	GO:0009507,chloroplast; GO:0030529,NA; GO:0005739,mitochondrion; GO:0003723,RNA binding; GO:0000373,Group II intron splicing; GO:0006397,mRNA processing	CRS1 / YhbY (CRM) domain
TRINITY_DN10043_c0_g1_i8.path1	6.23	5.63	5.21	1.68	2.1	0.71	435	487	372	108	166	51	0.282	-1.826	2.41977e-09	2.10994e-08	down	3C	154604358	154610987	-	TRINITY_DN10043_c0_g1_i8	--	--	--	--	--	--	--	--
TRINITY_DN10043_c0_g2_i1.path1	4.15	2.66	5.46	0.16	0.63	0.28	29	23	39	1	5	2	0.096	-3.376	1.25894e-05	6.5987e-05	down	3C	154606506	154606946	-	TRINITY_DN10043_c0_g2_i1	--	--	--	--	--	--	--	--
TRINITY_DN100432_c0_g1_i1.path1	2.03	1.76	1.56	6.78	6.55	9.99	14	15	11	43	51	71	4.876	2.286	7.86818e-07	4.95151e-06	up	4A	377167644	377168078	+	TRINITY_DN100432_c0_g1_i1	--	--	--	--	--	--	--	--
TRINITY_DN100432_c0_g1_i1.path2	3.09	1.66	2.59	6.71	5.99	12.84	21	14	18	42	46	90	3.928	1.974	5.80129e-05	0.000271017	up	3D	370775854	370776282	+	TRINITY_DN100432_c0_g1_i1	--	--	--	--	--	--	--	--
TRINITY_DN100439_c0_g1_i1.path2	3.38	3.13	0.37	0.27	0.11	0.24	27	31	3	2	1	2	0.101	-3.314	0.00122227	0.00434358	down	2A	238455471	238456114	-	TRINITY_DN100439_c0_g1_i1	--	--	--	--	--	--	--	--
TRINITY_DN100449_c0_g1_i1.path1	3.13	5.84	5.93	2.12	0.52	1.71	16	37	31	10	3	9	0.319	-1.648	0.0114884	0.031058	down	5A	395419377	395422722	+	TRINITY_DN100449_c0_g1_i1	--	K07195 exocyst complex component 7 | (RefSeq) exocyst complex component EXO70A1-like (A)	PREDICTED: exocyst complex component EXO70A1-like isoform X1 [Oryza brachyantha]	--	SubName: Full=Uncharacterized protein {ECO:0000313|EnsemblPlants:HORVU2Hr1G116970.1};	--	GO:0000145,exocyst; GO:0006887,exocytosis	--
TRINITY_DN10045_c0_g1_i2.path1	1.02	0.78	1.27	0.41	0.38	0.15	40	38	51	15	17	6	0.329	-1.602	0.00185836	0.00631398	down	7C	480972646	480975215	+	TRINITY_DN10045_c0_g1_i2	--	--	--	--	--	--	--	--
TRINITY_DN100450_c0_g1_i1.path2	7.47	9.05	20.07	39.84	40.15	43.27	48	72	132	236	292	287	3.671	1.876	1.93966e-07	1.32856e-06	up	4A	245693751	245699144	+	TRINITY_DN100450_c0_g1_i1	--	--	PREDICTED: uncharacterized protein LOC100833124 [Brachypodium distachyon]	--	SubName: Full=Uncharacterized protein {ECO:0000313|EnsemblPlants:BRADI1G14307.1};	--	GO:0005524,ATP binding; GO:0016301,kinase activity	--
TRINITY_DN100450_c0_g1_i1.path3	57.88	49.5	50.49	4.9	2.75	3.32	372	394	332	29	20	22	0.075	-3.73	2.33213e-34	1.18937e-32	down	4D	246939046	246945862	+	TRINITY_DN100450_c0_g1_i1	--	--	PREDICTED: uncharacterized protein LOC100833124 [Brachypodium distachyon]	--	SubName: Full=Uncharacterized protein {ECO:0000313|EnsemblPlants:BRADI1G14307.1};	--	GO:0005524,ATP binding; GO:0016301,kinase activity	--
TRINITY_DN10046_c0_g1_i3.path1	14.98	16.33	14.06	5.16	4.75	4.09	482	651	463	153	173	136	0.338	-1.564	7.90416e-14	1.0908e-12	down	5A	307561428	307566548	+	TRINITY_DN10046_c0_g1_i3	--	K13436 pto-interacting protein 1 [EC:2.7.11.1] | (RefSeq) probable receptor-like protein kinase At2g47060 (A)	PREDICTED: CBS domain-containing protein CBSCBSPB3 isoform X1 [Brachypodium distachyon]	RecName: Full=CBS domain-containing protein CBSCBSPB3;	SubName: Full=Uncharacterized protein {ECO:0000313|EMBL:KQJ92068.1, ECO:0000313|EnsemblPlants:BRADI4G41527.1};	--	GO:0016021,integral component of membrane	CBS domain
TRINITY_DN100467_c0_g1_i1.path1	9.26	7.09	4.18	60.04	71.99	45.56	39	37	18	233	343	198	9.46	3.242	5.46247e-25	1.69282e-23	up	4D	231021036	231021301	-	TRINITY_DN100467_c0_g1_i1	--	--	--	--	--	--	--	--
TRINITY_DN10047_c2_g1_i7.path1	4.32	3.31	3.51	1.22	2.32	1.24	300	285	249	78	182	89	0.466	-1.101	0.000161133	0.000692457	down	2C	408797391	408804453	+	TRINITY_DN10047_c2_g1_i7	--	--	--	--	--	--	--	--
TRINITY_DN100470_c0_g1_i1.path1	4.39	4.43	3	9.52	17.45	15.3	20	25	14	40	90	72	3.967	1.988	2.4857e-06	1.45093e-05	up	2A	424421871	424422158	-	TRINITY_DN100470_c0_g1_i1	--	--	--	--	--	--	--	--
TRINITY_DN100470_c0_g1_i1.path2	2.83	3.17	3.41	8.98	9.24	8.02	13	18	16	38	48	38	3.06	1.613	0.000303312	0.00123237	up	7D	414642839	414643128	-	TRINITY_DN100470_c0_g1_i1	--	--	--	--	--	--	--	--
TRINITY_DN100472_c0_g1_i1.path1	0	0.35	1.47	4.43	2.85	6.25	0	2	7	19	15	30	8.308	3.054	0.000363699	0.00145731	up	5A	194032445	194032738	+	TRINITY_DN100472_c0_g1_i1	--	--	--	--	--	--	--	--
TRINITY_DN100472_c0_g1_i1.path2	0	0	0.21	5.13	1.71	1.25	0	0	1	22	9	6	40.617	5.344	0.000272132	0.00111768	up	5D	160079905	160080198	+	TRINITY_DN100472_c0_g1_i1	--	--	--	--	--	--	--	--
TRINITY_DN100478_c0_g1_i1.path1	0.64	0.29	0.14	0	0	0	9	5	2	0	0	0	0.04	-4.654	0.0104162	0.028543	down	3D	62336755	62337647	-	TRINITY_DN100478_c0_g1_i1	--	--	--	--	--	--	--	--
TRINITY_DN10048_c1_g1_i4.path1	0.61	1.36	1.55	5.97	8.45	3.93	13	36	34	118	205	87	5.621	2.491	1.74451e-10	1.72186e-09	up	4C	367617968	367619321	+	TRINITY_DN10048_c1_g1_i4	--	--	--	--	--	--	--	--
TRINITY_DN10048_c2_g1_i1.path1	2.63	4.11	3.77	49.31	33.03	24.99	15	29	22	259	213	147	11.055	3.467	2.36434e-23	6.63589e-22	up	5C	322979929	322980288	+	TRINITY_DN10048_c2_g1_i1	--	--	--	--	--	--	--	--
TRINITY_DN10049_c0_g1_i6.path1	12.71	10.86	10.11	1.4	2.71	1.42	886	938	721	90	214	102	0.179	-2.484	1.21892e-20	2.85637e-19	down	2A	398161386	398167934	-	TRINITY_DN10049_c0_g1_i6	--	--	--	--	--	--	--	--
TRINITY_DN100493_c0_g1_i1.path1	0.46	0.19	0	41.03	22.41	48.25	2	1	0	164	110	216	197.538	7.626	7.85212e-17	1.39654e-15	up	7C	1965273	1965665	+	TRINITY_DN100493_c0_g1_i1	--	--	--	--	--	--	--	--
TRINITY_DN100495_c0_g1_i1.path2	1.6	1.62	1.7	0.43	0.47	0.58	24	30	26	6	8	9	0.335	-1.579	0.00711941	0.0204831	down	Chr00	60715677	60716623	-	TRINITY_DN100495_c0_g1_i1	--	--	PREDICTED: putative disease resistance RPP13-like protein 3 [Brachypodium distachyon]	--	SubName: Full=Uncharacterized protein {ECO:0000313|EMBL:KQJ87180.1, ECO:0000313|EnsemblPlants:BRADI4G09587.3};	--	GO:0005886,plasma membrane; GO:0043531,ADP binding; GO:0006952,defense response; GO:0007165,signal transduction	--
TRINITY_DN10050_c0_g3_i1.path1	4.17	3.22	3.9	6.55	7.06	9.11	47	45	45	68	90	106	2.234	1.16	0.000881253	0.00324157	up	3D	403071600	403072311	+	TRINITY_DN10050_c0_g3_i1	--	--	--	--	--	--	--	--
TRINITY_DN100501_c0_g1_i1.path1	3.8	5.95	6.07	0.37	0.71	0.67	33	64	54	3	7	6	0.123	-3.02	1.44979e-07	1.01049e-06	down	4A	432515998	432516546	+	TRINITY_DN100501_c0_g1_i1	--	K13420 LRR receptor-like serine/threonine-protein kinase FLS2 [EC:2.7.11.1] | (RAP-DB) Os06g0587000; Leucine-rich repeat domain containing protein. (A)	probable LRR receptor-like serine/threonine-protein kinase At3g47570 isoform X1 [Setaria italica]	RecName: Full=Probable LRR receptor-like serine/threonine-protein kinase At3g47570; EC=2.7.11.1; Flags: Precursor;	SubName: Full=Uncharacterized protein {ECO:0000313|EMBL:KQL16370.1, ECO:0000313|EnsemblPlants:Si021081m};	--	GO:0016021,integral component of membrane; GO:0005886,plasma membrane; GO:0005524,ATP binding; GO:0004674,protein serine/threonine kinase activity	Leucine rich repeat
TRINITY_DN100505_c0_g1_i1.path1	0	0	0	1.75	2.14	2.19	0	0	0	10	15	14	81.642	6.351	8.77814e-06	4.71243e-05	up	5D	17498941	17499331	+	TRINITY_DN100505_c0_g1_i1	--	--	hypothetical protein TRIUR3_21214 [Triticum urartu]	--	SubName: Full=Uncharacterized protein {ECO:0000313|EMBL:EMS53194.1, ECO:0000313|EnsemblPlants:TRIUR3_21214-P1};	--	--	--
TRINITY_DN100510_c0_g1_i1.path2	4.1	5.06	4.01	0	2.13	0.47	17	26	17	0	10	2	0.22	-2.185	0.00998134	0.0275142	down	5A	449473436	449473697	+	TRINITY_DN100510_c0_g1_i1	--	--	--	--	--	--	--	--
TRINITY_DN100527_c0_g1_i1.path1	1.68	0.91	0.41	3.66	3.1	2.58	12	8	3	24	25	19	3.429	1.778	0.00529728	0.015831	up	1D	71342191	71342640	+	TRINITY_DN100527_c0_g1_i1	--	--	--	--	--	--	--	--
TRINITY_DN10053_c0_g1_i1.path1	1.02	0.76	1.14	29.59	41.25	46.53	27	25	31	724	1239	1275	44.822	5.486	2.82705e-70	5.99701e-68	up	3A	400332082	400335460	-	TRINITY_DN10053_c0_g1_i1	--	K10251 17beta-estradiol 17-dehydrogenase / very-long-chain 3-oxoacyl-CoA reductase [EC:1.1.1.62 1.1.1.330] | (RefSeq) LOC109746082; very-long-chain 3-oxoacyl-CoA reductase 1-like (A)	very-long-chain 3-oxoacyl-CoA reductase 1-like [Aegilops tauschii subsp. tauschii]	--	SubName: Full=Inactive hydroxysteroid dehydrogenase-like protein 1 {ECO:0000313|EMBL:EMT11140.1, ECO:0000313|EnsemblPlants:EMT11140};	--	GO:0016021,integral component of membrane	--
TRINITY_DN10053_c0_g4_i1.path1	0.86	1.29	0.9	2.07	2.82	1.67	14	26	15	31	52	28	2.343	1.228	0.00781111	0.0222313	up	7A	427612645	427614837	+	TRINITY_DN10053_c0_g4_i1	--	K10251 17beta-estradiol 17-dehydrogenase / very-long-chain 3-oxoacyl-CoA reductase [EC:1.1.1.62 1.1.1.330] | (RefSeq) LOC109743960; very-long-chain 3-oxoacyl-CoA reductase 1-like (A)	very-long-chain 3-oxoacyl-CoA reductase 1-like [Aegilops tauschii subsp. tauschii]	RecName: Full=Very-long-chain 3-oxoacyl-CoA reductase 1; EC=1.1.1.330; AltName: Full=Beta-ketoacyl reductase 1; Short=AtKCR1; AltName: Full=Protein GLOSSY 8; Short=gl8At;	SubName: Full=Uncharacterized protein {ECO:0000313|EnsemblPlants:TRIAE_CS42_7DS_TGACv1_622265_AA2036720.1};	--	GO:0005783,endoplasmic reticulum; GO:0005789,endoplasmic reticulum membrane; GO:0016021,integral component of membrane; GO:0016020,membrane; GO:0102339,3-oxo-arachidoyl-CoA reductase activity; GO:0102340,3-oxo-behenoyl-CoA reductase activity; GO:0102342,3-oxo-cerotoyl-CoA reductase activity; GO:0102341,3-oxo-lignoceroyl-CoA reductase activity; GO:0018454,acetoacetyl-CoA reductase activity; GO:004…	short chain dehydrogenase
TRINITY_DN10053_c2_g1_i1.path1	8.2	6.04	5.42	0.52	1.92	1.4	34	31	23	2	9	6	0.219	-2.193	0.000673217	0.00254293	down	7D	27733586	27735200	-	TRINITY_DN10053_c2_g1_i1	--	K10251 17beta-estradiol 17-dehydrogenase / very-long-chain 3-oxoacyl-CoA reductase [EC:1.1.1.62 1.1.1.330] | (RefSeq) LOC109765210; very-long-chain 3-oxoacyl-CoA reductase 1-like (A)	predicted protein [Hordeum vulgare subsp. vulgare]	RecName: Full=Very-long-chain 3-oxoacyl-CoA reductase 1; EC=1.1.1.330; AltName: Full=Beta-ketoacyl reductase 1; Short=AtKCR1; AltName: Full=Protein GLOSSY 8; Short=gl8At;	SubName: Full=Predicted protein {ECO:0000313|EMBL:BAK06289.1};	--	GO:0005783,endoplasmic reticulum; GO:0005789,endoplasmic reticulum membrane; GO:0016021,integral component of membrane; GO:0016020,membrane; GO:0102339,3-oxo-arachidoyl-CoA reductase activity; GO:0102340,3-oxo-behenoyl-CoA reductase activity; GO:0102342,3-oxo-cerotoyl-CoA reductase activity; GO:0102341,3-oxo-lignoceroyl-CoA reductase activity; GO:0018454,acetoacetyl-CoA reductase activity; GO:004…	--
TRINITY_DN100535_c0_g1_i1.path1	3.56	3.79	2.37	0.7	0.14	0.31	22	29	15	4	1	2	0.127	-2.972	0.000344317	0.00138592	down	7C	318156106	318156495	+	TRINITY_DN100535_c0_g1_i1	--	--	--	--	--	--	--	--
TRINITY_DN100555_c0_g1_i1.path1	3.29	4.36	4.64	1.74	1.03	1.2	45	74	65	22	16	17	0.352	-1.504	0.000411684	0.00162905	down	7D	494549261	494551465	+	TRINITY_DN100555_c0_g1_i1	--	K17302 coatomer subunit beta' | (RefSeq) uncharacterized protein LOC109752367 (A)	uncharacterized protein LOC109752367 [Aegilops tauschii subsp. tauschii]	RecName: Full=Putative cysteine-rich receptor-like protein kinase 20; Short=Cysteine-rich RLK20; EC=2.7.11.-; Flags: Precursor;	SubName: Full=Uncharacterized protein {ECO:0000313|EnsemblPlants:TRIAE_CS42_7BL_TGACv1_578433_AA1894790.2};	Serine/threonine protein kinase	GO:0016021,integral component of membrane; GO:0005886,plasma membrane; GO:0005524,ATP binding; GO:0004674,protein serine/threonine kinase activity; GO:0006468,protein phosphorylation	Protein kinase domain
TRINITY_DN100558_c0_g1_i1.path1	4.81	13.84	8.23	19.58	13.56	22.44	16	57	28	60	51	77	2.309	1.207	0.00614528	0.0180319	up	6C	146696033	146696242	-	TRINITY_DN100558_c0_g1_i1	--	K14638 solute carrier family 15 (peptide/histidine transporter), member 3/4 | (RefSeq) hypothetical protein (A)	PREDICTED: MACPF domain-containing protein At1g14780-like isoform X1 [Brachypodium distachyon]	RecName: Full=MACPF domain-containing protein At1g14780;	SubName: Full=Uncharacterized protein {ECO:0000313|EMBL:KQK02019.1, ECO:0000313|EnsemblPlants:BRADI3G59900.1};	--	GO:0009626,plant-type hypersensitive response	--
TRINITY_DN100558_c0_g1_i1.path2	5.41	9.72	3.82	32.97	58.49	49.25	18	40	13	101	220	169	8.201	3.036	1.74146e-15	2.77456e-14	up	6D	182527823	182528032	+	TRINITY_DN100558_c0_g1_i1	--	K14638 solute carrier family 15 (peptide/histidine transporter), member 3/4 | (RefSeq) hypothetical protein (A)	PREDICTED: MACPF domain-containing protein At1g14780-like isoform X1 [Brachypodium distachyon]	RecName: Full=MACPF domain-containing protein At1g14780;	SubName: Full=Uncharacterized protein {ECO:0000313|EMBL:KQK02019.1, ECO:0000313|EnsemblPlants:BRADI3G59900.1};	--	GO:0009626,plant-type hypersensitive response	--
TRINITY_DN100558_c0_g1_i1.path3	2.11	6.32	2.35	29.7	41.47	54.5	7	26	8	91	156	187	12.964	3.696	1.07003e-16	1.88332e-15	up	6A	211582175	211582384	+	TRINITY_DN100558_c0_g1_i1	--	K14638 solute carrier family 15 (peptide/histidine transporter), member 3/4 | (RefSeq) hypothetical protein (A)	PREDICTED: MACPF domain-containing protein At1g14780-like isoform X1 [Brachypodium distachyon]	RecName: Full=MACPF domain-containing protein At1g14780;	SubName: Full=Uncharacterized protein {ECO:0000313|EMBL:KQK02019.1, ECO:0000313|EnsemblPlants:BRADI3G59900.1};	--	GO:0009626,plant-type hypersensitive response	--
TRINITY_DN10056_c0_g1_i1.path1	4.69	4.58	2.88	0.82	1.07	1.02	62	75	39	10	16	14	0.266	-1.909	2.45469e-05	0.00012257	down	7A	436674921	436680081	+	TRINITY_DN10056_c0_g1_i1	--	--	--	--	--	--	--	--
TRINITY_DN100572_c0_g1_i1.path1	19.18	20.03	14.27	109.21	114.14	133.66	109	141	83	572	734	784	7.428	2.893	2.22159e-32	1.03288e-30	up	4C	376347924	376348282	-	TRINITY_DN100572_c0_g1_i1	--	--	--	--	--	--	--	--
TRINITY_DN100578_c0_g1_i1.path1	4.61	6.02	1.72	0.29	1.32	0.39	34	55	13	2	11	3	0.182	-2.459	0.00055243	0.00212671	down	4A	319882282	319883043	-	TRINITY_DN100578_c0_g1_i1	--	--	--	--	--	--	--	--
TRINITY_DN100582_c0_g1_i1.path2	3.75	2.74	1.4	6.39	4.42	5.71	21	19	8	33	28	33	2.324	1.217	0.0185746	0.046792	up	1D	355372336	355372689	+	TRINITY_DN100582_c0_g1_i1	--	--	--	--	--	--	--	--
TRINITY_DN100585_c0_g1_i1.path1	9.64	6.13	8.82	2.23	2.9	2.78	47	37	44	10	16	14	0.354	-1.499	0.0020847	0.00699165	down	5C	557630886	557631193	-	TRINITY_DN100585_c0_g1_i1	--	--	--	--	--	--	--	--
TRINITY_DN100587_c0_g1_i1.path1	17.22	2.61	5.11	1.67	0.41	0.45	112	21	34	10	3	3	0.107	-3.225	1.26846e-05	6.64707e-05	down	6C	3638992	3639402	+	TRINITY_DN100587_c0_g1_i1	--	--	--	--	--	--	--	--
TRINITY_DN10059_c0_g2_i4.path1	0	0	0	0.21	0.59	0.41	0	0	0	4	14	9	54.998	5.781	0.000201236	0.000848851	up	7C	485177922	485179256	+	TRINITY_DN10059_c0_g2_i4	--	--	--	--	--	--	--	--
TRINITY_DN1006_c0_g1_i7.path1	8.74	8.35	12	2.52	2.68	2.71	432	511	607	115	150	138	0.298	-1.749	1.49199e-11	1.64798e-10	down	6A	414719261	414724060	+	TRINITY_DN1006_c0_g1_i7	--	K03549 KUP system potassium uptake protein | (RefSeq) LOC109784592; probable potassium transporter 9 (A)	probable potassium transporter 9 [Aegilops tauschii subsp. tauschii]	RecName: Full=Probable potassium transporter 9; AltName: Full=OsHAK9;	RecName: Full=Potassium transporter {ECO:0000256|RuleBase:RU321113};	--	GO:0016021,integral component of membrane; GO:0005886,plasma membrane; GO:0015079,potassium ion transmembrane transporter activity	K+ potassium transporter
TRINITY_DN10060_c0_g1_i2.path1	9.35	8.39	9.89	25.05	21.67	27.83	280	311	303	691	734	860	2.983	1.577	3.1082e-11	3.3297e-10	up	2C	422735407	422737297	-	TRINITY_DN10060_c0_g1_i2	--	--	--	--	--	--	--	--
TRINITY_DN100611_c0_g1_i1.path1	0.23	1.89	0	3.3	4.14	5.21	1	10	0	13	20	23	6.548	2.711	0.00219724	0.00732111	up	1D	235082460	235082729	+	TRINITY_DN100611_c0_g1_i1	--	--	--	--	--	--	--	--
TRINITY_DN10062_c0_g2_i1.path1	0	0	0	1.37	1.36	0.95	0	0	0	9	11	7	56.09	5.81	0.000135602	0.00059114	up	5D	396285448	396285898	-	TRINITY_DN10062_c0_g2_i1	--	--	--	--	--	--	--	--
TRINITY_DN100630_c0_g1_i1.path1	0.54	1.1	0.53	4.43	1.68	3.43	2	5	2	15	7	13	4.81	2.266	0.0115944	0.0312983	up	2D	380055894	380056125	+	TRINITY_DN100630_c0_g1_i1	--	--	--	--	--	--	--	--
TRINITY_DN100631_c0_g1_i1.path1	10.08	10.2	11.61	4.57	4.65	4.08	67	84	79	28	35	28	0.456	-1.132	0.0013875	0.00486944	down	7C	281796454	281796873	+	TRINITY_DN100631_c0_g1_i1	--	--	--	--	--	--	--	--
TRINITY_DN100639_c0_g1_i1.path1	38.82	37.79	30.68	97.45	96.52	101.02	204	246	165	472	574	548	3.04	1.604	1.78009e-13	2.37597e-12	up	4D	344766589	344766920	-	TRINITY_DN100639_c0_g1_i1	--	--	--	--	--	--	--	--
TRINITY_DN10064_c0_g1_i5.path1	0.27	0.22	0.34	1.81	0.53	1.42	12	12	15	73	26	64	5.01	2.325	1.48378e-05	7.6829e-05	up	4D	278001791	278004932	+	TRINITY_DN10064_c0_g1_i5	--	K03063 26S proteasome regulatory subunit T3 | (RefSeq) 26S protease regulatory subunit 6B homolog (A)	predicted protein [Hordeum vulgare subsp. vulgare]	RecName: Full=BTB/POZ domain-containing protein At5g66560;	SubName: Full=Uncharacterized protein {ECO:0000313|EnsemblPlants:TRIAE_CS42_5AL_TGACv1_374393_AA1198690.1};	--	GO:0005886,plasma membrane; GO:0016567,protein ubiquitination	NPH3 family
TRINITY_DN10064_c0_g1_i5.path2	0.71	0.43	0.78	2.83	1.46	2.28	31	23	35	114	72	103	3.774	1.916	2.09659e-06	1.23878e-05	up	Chr00	220096864	220100005	-	TRINITY_DN10064_c0_g1_i5	--	K03063 26S proteasome regulatory subunit T3 | (RefSeq) 26S protease regulatory subunit 6B homolog (A)	predicted protein [Hordeum vulgare subsp. vulgare]	RecName: Full=BTB/POZ domain-containing protein At5g66560;	SubName: Full=Uncharacterized protein {ECO:0000313|EnsemblPlants:TRIAE_CS42_5AL_TGACv1_374393_AA1198690.1};	--	GO:0005886,plasma membrane; GO:0016567,protein ubiquitination	NPH3 family
TRINITY_DN100643_c0_g1_i1.path1	230.86	212.42	185.73	33.57	20.45	20.15	888	1012	731	119	89	80	0.129	-2.959	1.34662e-32	6.32716e-31	down	3C	577995495	577995737	+	TRINITY_DN100643_c0_g1_i1	--	--	--	--	--	--	--	--
TRINITY_DN100657_c0_g1_i1.path1	38.36	30.72	21.95	3.45	5.08	3.48	374	371	219	31	56	35	0.145	-2.784	4.77763e-20	1.07028e-18	down	3D	383836997	383837612	-	TRINITY_DN100657_c0_g1_i1	--	--	--	--	--	--	--	--
TRINITY_DN100658_c0_g1_i1.path1	0.68	0.24	0.19	2.85	3.95	1.79	7	3	2	27	46	19	8.546	3.095	6.55851e-06	3.59337e-05	up	3C	105041152	105041801	-	TRINITY_DN100658_c0_g1_i1	--	--	PREDICTED: uncharacterized protein LOC4345264 [Oryza sativa Japonica Group]	--	SubName: Full=Uncharacterized protein {ECO:0000313|EnsemblPlants:TRIAE_CS42_U_TGACv1_641052_AA2083430.1};	--	GO:0004190,aspartic-type endopeptidase activity	--
TRINITY_DN10066_c1_g2_i1.path1	0	0.23	0.28	36.31	36.2	47.79	0	1	1	116	142	171	253.849	7.988	9.98467e-14	1.36698e-12	up	7A	427772356	427772574	-	TRINITY_DN10066_c1_g2_i1	--	--	--	--	--	--	--	--
TRINITY_DN100661_c0_g1_i1.path1	2.13	0.78	2.08	0	0.34	0	11	5	11	0	2	0	0.078	-3.682	0.0109769	0.0298687	down	4A	312315281	312315860	-	TRINITY_DN100661_c0_g1_i1	--	--	--	--	--	--	--	--
TRINITY_DN100671_c0_g1_i1.path1	3.2	5.54	4.25	0.5	0.61	1.77	14	30	19	2	3	8	0.251	-1.995	0.00827831	0.0233902	down	3A	10089982	10090257	-	TRINITY_DN100671_c0_g1_i1	--	--	--	--	--	--	--	--
TRINITY_DN100674_c0_g1_i1.path1	2.22	3.28	1.62	17.04	15.34	17.72	12	22	9	85	94	99	7.748	2.954	1.9004e-13	2.52712e-12	up	3A	374914986	374915327	+	TRINITY_DN100674_c0_g1_i1	--	K13496 UDP-glucosyl transferase 73C [EC:2.4.1.-] | (RefSeq) UDP-glycosyltransferase 73C6-like (A)	unnamed protein product [Triticum aestivum]	--	RecName: Full=Glycosyltransferase {ECO:0000256|RuleBase:RU362057}; EC=2.4.1.- {ECO:0000256|RuleBase:RU362057};	--	GO:0016758,transferase activity, transferring hexosyl groups; GO:0008152,metabolic process	--
TRINITY_DN100687_c0_g1_i1.path2	0.18	0.43	0	2.88	1.41	0.51	1	3	0	15	9	3	8.284	3.05	0.0121916	0.0326519	up	7D	38436880	38437236	+	TRINITY_DN100687_c0_g1_i1	--	--	hypothetical protein TRIUR3_29583 [Triticum urartu]	--	SubName: Full=Uncharacterized protein {ECO:0000313|EnsemblPlants:TRIAE_CS42_7AS_TGACv1_569051_AA1805760.6};	--	--	--
TRINITY_DN100695_c0_g1_i1.path1	4.3	5.21	2.89	9.33	10.45	7.55	16	24	11	32	44	29	2.415	1.272	0.00663804	0.0192858	up	4D	270111827	270112061	-	TRINITY_DN100695_c0_g1_i1	--	--	--	--	--	--	--	--
TRINITY_DN1007_c1_g1_i1.path1	3.21	2.75	2.55	6.53	11.17	7.97	16	17	13	30	63	41	3.32	1.731	0.000167465	0.000717549	up	1D	329611292	329611606	-	TRINITY_DN1007_c1_g1_i1	--	--	--	--	--	--	--	--
TRINITY_DN10070_c0_g1_i1.path1	5.67	3.67	7.39	1.03	0.84	2.02	30	24	40	5	5	11	0.257	-1.962	0.00184885	0.00628441	down	2A	343318969	343319302	-	TRINITY_DN10070_c0_g1_i1	--	--	--	--	--	--	--	--
TRINITY_DN10070_c0_g2_i4.path1	0.87	0.97	0.77	1.11	2.37	1.34	34	47	31	40	105	54	2.019	1.013	0.00928856	0.0258625	up	7C	567030902	567033374	+	TRINITY_DN10070_c0_g2_i4	--	--	--	--	--	--	--	--
TRINITY_DN100701_c0_g1_i1.path1	7.4	11.57	11.6	37.11	43.16	51.2	48	93	77	222	317	343	4.774	2.255	1.64598e-14	2.41502e-13	up	1A	237706496	237706905	+	TRINITY_DN100701_c0_g1_i1	--	--	--	--	--	--	--	--
TRINITY_DN100701_c0_g1_i1.path2	20.19	23.39	22.14	44.97	37.44	41.05	131	188	147	269	275	275	2.07	1.05	9.15866e-06	4.90398e-05	up	1D	228181910	228182319	+	TRINITY_DN100701_c0_g1_i1	--	--	--	--	--	--	--	--
TRINITY_DN100703_c0_g1_i1.path2	6.69	10.05	9.62	24.59	21.67	27	36	67	53	122	132	150	3.074	1.62	2.62056e-07	1.7638e-06	up	7D	439223002	439223341	-	TRINITY_DN100703_c0_g1_i1	--	--	--	--	--	--	--	--
TRINITY_DN10071_c0_g2_i2.path1	3.21	2.33	1.46	0.7	0.47	0.41	30	27	14	6	5	4	0.247	-2.02	0.00320377	0.0102028	down	6C	496583533	496584123	+	TRINITY_DN10071_c0_g2_i2	--	--	uncharacterized protein LOC109734768 [Aegilops tauschii subsp. tauschii]	--	SubName: Full=Uncharacterized protein {ECO:0000313|EnsemblPlants:TRIAE_CS42_6BS_TGACv1_518580_AA1677490.1};	--	--	--
TRINITY_DN10071_c1_g2_i1.path1	1.01	1.29	0.35	0	0.13	0	14	22	5	0	2	0	0.057	-4.143	0.0024279	0.00799952	down	2D	475911071	475911942	-	TRINITY_DN10071_c1_g2_i1	--	--	uncharacterized protein LOC109734768 [Aegilops tauschii subsp. tauschii]	--	SubName: Full=Uncharacterized protein {ECO:0000313|EnsemblPlants:TRIAE_CS42_6BS_TGACv1_518580_AA1677490.1};	--	--	F-box-like
TRINITY_DN100713_c0_g1_i1.path1	14.17	15.56	16.57	65.27	50.29	47.25	61	83	73	259	245	210	3.846	1.943	1.59039e-13	2.1347e-12	up	6C	483841257	483841528	-	TRINITY_DN100713_c0_g1_i1	--	--	--	--	--	--	--	--
TRINITY_DN100715_c0_g1_i1.path1	141.49	155.12	154.93	19.25	20.28	16.28	598	812	670	75	97	71	0.135	-2.887	8.61033e-39	5.40321e-37	down	4C	509462153	509462520	-	TRINITY_DN100715_c0_g1_i1	--	K01807 ribose 5-phosphate isomerase A [EC:5.3.1.6] | (RefSeq) LOC109753008; probable ribose-5-phosphate isomerase 4, chloroplastic (A)	predicted protein [Hordeum vulgare subsp. vulgare]	--	SubName: Full=Uncharacterized protein {ECO:0000313|EnsemblPlants:TRIAE_CS42_5DL_TGACv1_435042_AA1445280.1};	--	GO:0009507,chloroplast; GO:0004751,ribose-5-phosphate isomerase activity; GO:0009052,pentose-phosphate shunt, non-oxidative branch	Histone chaperone domain CHZ
TRINITY_DN100715_c0_g1_i1.path2	167.99	171.36	191.7	21.82	21.54	18.11	710	897	829	85	103	79	0.126	-2.985	1.46459e-40	1.00657e-38	down	4A	293884359	293884747	-	TRINITY_DN100715_c0_g1_i1	--	K01807 ribose 5-phosphate isomerase A [EC:5.3.1.6] | (RefSeq) LOC109753008; probable ribose-5-phosphate isomerase 4, chloroplastic (A)	predicted protein [Hordeum vulgare subsp. vulgare]	--	SubName: Full=Uncharacterized protein {ECO:0000313|EnsemblPlants:TRIAE_CS42_5AL_TGACv1_376389_AA1236180.1};	--	GO:0009507,chloroplast; GO:0004751,ribose-5-phosphate isomerase activity; GO:0009052,pentose-phosphate shunt, non-oxidative branch	--
TRINITY_DN10073_c0_g1_i2.path2	0.91	1.21	1.52	4.47	5.11	5.6	17	28	29	77	108	108	4.61	2.205	2.13498e-09	1.87231e-08	up	6D	57111580	57114732	-	TRINITY_DN10073_c0_g1_i2	--	K15029 translation initiation factor 3 subunit L | (RefSeq) eukaryotic translation initiation factor 3 subunit L (A)	PREDICTED: uncharacterized protein LOC100834020 [Brachypodium distachyon]	--	SubName: Full=Uncharacterized protein {ECO:0000313|EMBL:KQJ94355.1, ECO:0000313|EnsemblPlants:BRADI3G10090.1};	--	GO:0016021,integral component of membrane	--
TRINITY_DN10074_c0_g2_i1.path1	10.14	8.58	8.7	3.62	1.53	1.92	82	86	72	27	14	16	0.279	-1.841	9.69531e-06	5.17267e-05	down	4D	1614651	1615464	+	TRINITY_DN10074_c0_g2_i1	--	--	--	--	--	--	--	--
TRINITY_DN100745_c0_g1_i1.path1	8.73	6.61	3.85	0.75	3.34	0.75	113	106	51	9	49	10	0.274	-1.866	0.000351876	0.00141408	down	7C	18256687	18257504	+	TRINITY_DN100745_c0_g1_i1	--	--	--	--	--	--	--	--
TRINITY_DN100756_c0_g1_i1.path1	0.94	1.59	1.47	0.1	0.08	0.36	10	21	16	1	1	4	0.154	-2.698	0.00413647	0.0127569	down	6C	466040316	466047874	-	TRINITY_DN100756_c0_g1_i1	--	--	--	--	--	--	--	--
TRINITY_DN10076_c0_g1_i2.path1	0.59	2.25	0.86	19.88	2.98	13.21	4	19	6	125	23	93	10.857	3.441	5.70456e-08	4.18792e-07	up	6C	588732690	588733120	+	TRINITY_DN10076_c0_g1_i2	--	K08235 xyloglucan:xyloglucosyl transferase [EC:2.4.1.207] | (RefSeq) LOC109737794; probable xyloglucan endotransglucosylase/hydrolase protein 23 (A)	putative xyloglucan endotransglucosylase/hydrolase protein 23 [Triticum urartu]	RecName: Full=Xyloglucan endotransglucosylase/hydrolase protein 22; Short=At-XTH22; Short=XTH-22; EC=2.4.1.207; AltName: Full=Touch protein 4; Flags: Precursor;	SubName: Full=Xyloglucan endotransglucosylase/hydrolase protein 22 {ECO:0000313|EMBL:EMT32919.1, ECO:0000313|EnsemblPlants:EMT32919};	--	GO:0048046,apoplast; GO:0005618,cell wall; GO:0005794,Golgi apparatus; GO:0004553,hydrolase activity, hydrolyzing O-glycosyl compounds; GO:0016762,xyloglucan:xyloglucosyl transferase activity; GO:0042546,cell wall biogenesis; GO:0009664,plant-type cell wall organization; GO:0009733,response to auxin; GO:0009741,response to brassinosteroid; GO:0009409,response to cold; GO:0009408,response to heat;…	--
TRINITY_DN10076_c0_g2_i1.path1	0.76	3.48	2.73	25.05	4.04	14.26	3	17	11	91	18	58	6.846	2.775	1.69778e-05	8.70579e-05	up	6C	588753788	588754036	-	TRINITY_DN10076_c0_g2_i1	--	--	--	--	--	--	--	--
TRINITY_DN100781_c0_g1_i1.path1	0	0.77	0	1.04	9.52	6.49	0	4	0	4	45	28	23.031	4.526	3.71931e-05	0.000179909	up	7D	73779251	73779514	-	TRINITY_DN100781_c0_g1_i1	--	--	--	--	--	--	--	--
TRINITY_DN100788_c0_g1_i1.path1	3.32	4.42	2.11	0.54	1.03	0.48	20	33	13	3	7	3	0.231	-2.117	0.00357545	0.0112275	down	5A	50549967	50550347	-	TRINITY_DN100788_c0_g1_i1	--	--	--	--	--	--	--	--
TRINITY_DN100788_c0_g1_i1.path4	2.16	1.47	1.46	0	0	0	13	11	9	0	0	0	0.019	-5.696	0.000148534	0.000642998	down	3A	19905079	19905459	+	TRINITY_DN100788_c0_g1_i1	--	--	--	--	--	--	--	--
TRINITY_DN10079_c0_g1_i2.path1	13.69	14.45	13.46	4.68	4.48	2.51	365	477	367	115	135	69	0.304	-1.719	6.88031e-12	7.85688e-11	down	4A	316927802	316934388	+	TRINITY_DN10079_c0_g1_i2	--	K04799 flap endonuclease-1 [EC:3.-.-.-] | (RefSeq) flap endonuclease 1-B-like (A)	PREDICTED: flap endonuclease 1-B-like isoform X1 [Brachypodium distachyon]	RecName: Full=Flap endonuclease 1-B {ECO:0000255|HAMAP-Rule:MF_03140}; Short=FEN-1-B {ECO:0000255|HAMAP-Rule:MF_03140}; EC=3.1.-.- {ECO:0000255|HAMAP-Rule:MF_03140}; AltName: Full=Flap structure-specific endonuclease 1-B {ECO:0000255|HAMAP-Rule:MF_03140}; AltName: Full=OsFEN-1b;	RecName: Full=Flap endonuclease 1 {ECO:0000256|HAMAP-Rule:MF_03140}; Short=FEN-1 {ECO:0000256|HAMAP-Rule:MF_03140}; EC=3.1.-.- {ECO:0000256|HAMAP-Rule:MF_03140}; AltName: Full=Flap structure-specific endonuclease 1 {ECO:0000256|HAMAP-Rule:MF_03140};	5'-3' exonuclease	GO:0005739,mitochondrion; GO:0005730,nucleolus; GO:0005654,nucleoplasm; GO:0003677,DNA binding; GO:0004519,endonuclease activity; GO:0004527,exonuclease activity; GO:0046872,metal ion binding; GO:0006281,DNA repair; GO:0006260,DNA replication	XPG I-region
TRINITY_DN10079_c0_g1_i2.path2	2.15	2.32	1.65	0.25	0.58	0.19	56	75	44	6	17	5	0.182	-2.457	1.19759e-06	7.34057e-06	down	4D	312154580	312161217	+	TRINITY_DN10079_c0_g1_i2	--	K04799 flap endonuclease-1 [EC:3.-.-.-] | (RefSeq) flap endonuclease 1-B-like (A)	PREDICTED: flap endonuclease 1-B-like isoform X1 [Brachypodium distachyon]	RecName: Full=Flap endonuclease 1-B {ECO:0000255|HAMAP-Rule:MF_03140}; Short=FEN-1-B {ECO:0000255|HAMAP-Rule:MF_03140}; EC=3.1.-.- {ECO:0000255|HAMAP-Rule:MF_03140}; AltName: Full=Flap structure-specific endonuclease 1-B {ECO:0000255|HAMAP-Rule:MF_03140}; AltName: Full=OsFEN-1b;	RecName: Full=Flap endonuclease 1 {ECO:0000256|HAMAP-Rule:MF_03140}; Short=FEN-1 {ECO:0000256|HAMAP-Rule:MF_03140}; EC=3.1.-.- {ECO:0000256|HAMAP-Rule:MF_03140}; AltName: Full=Flap structure-specific endonuclease 1 {ECO:0000256|HAMAP-Rule:MF_03140};	5'-3' exonuclease	GO:0005739,mitochondrion; GO:0005730,nucleolus; GO:0005654,nucleoplasm; GO:0003677,DNA binding; GO:0004519,endonuclease activity; GO:0004527,exonuclease activity; GO:0046872,metal ion binding; GO:0006281,DNA repair; GO:0006260,DNA replication	XPG I-region
TRINITY_DN100795_c0_g1_i1.path1	2.92	5.01	8.21	0	0	0	16	34	46	0	0	0	0.007	-7.238	6.21168e-08	4.53767e-07	down	2A	357019878	357020223	+	TRINITY_DN100795_c0_g1_i1	--	--	--	--	--	--	--	--
TRINITY_DN100795_c0_g1_i1.path2	2.39	1.64	4.86	0.6	0	0	13	11	27	3	0	0	0.067	-3.905	0.000773835	0.00288243	down	2D	381811981	381812323	-	TRINITY_DN100795_c0_g1_i1	--	--	predicted protein [Hordeum vulgare subsp. vulgare]	--	SubName: Full=Uncharacterized protein {ECO:0000313|EnsemblPlants:HORVU2Hr1G090690.2};	--	--	--
TRINITY_DN1008_c0_g2_i2.path1	6.49	9.29	6.37	16.38	13.96	19.84	215	381	216	500	523	678	2.536	1.342	1.93925e-07	1.32837e-06	up	4A	82964851	82971440	+	TRINITY_DN1008_c0_g2_i2	--	K00600 glycine hydroxymethyltransferase [EC:2.1.2.1] | (RefSeq) LOC109770763; serine hydroxymethyltransferase 4 (A)	hypothetical protein BRADI_4g19470v3 [Brachypodium distachyon]	RecName: Full=Serine hydroxymethyltransferase 4; Short=AtSHMT4; EC=2.1.2.1; AltName: Full=Glycine hydroxymethyltransferase 4; AltName: Full=Serine methylase 4;	RecName: Full=Serine hydroxymethyltransferase {ECO:0000256|RuleBase:RU000585}; EC=2.1.2.1 {ECO:0000256|RuleBase:RU000585};	Glycine/serine hydroxymethyltransferase	GO:0005829,cytosol; GO:0016020,membrane; GO:0005886,plasma membrane; GO:0009506,plasmodesma; GO:0004372,glycine hydroxymethyltransferase activity; GO:0030170,pyridoxal phosphate binding; GO:0007623,circadian rhythm; GO:0019264,glycine biosynthetic process from serine; GO:0046686,response to cadmium ion; GO:0035999,tetrahydrofolate interconversion	Serine hydroxymethyltransferase
TRINITY_DN1008_c0_g2_i2.path2	11.87	14.14	13.03	26.09	22.38	29.06	389	574	437	788	830	983	2.205	1.141	4.38097e-07	2.85999e-06	up	4D	97592264	97598801	-	TRINITY_DN1008_c0_g2_i2	--	K00600 glycine hydroxymethyltransferase [EC:2.1.2.1] | (RefSeq) LOC109770763; serine hydroxymethyltransferase 4 (A)	hypothetical protein BRADI_4g19470v3 [Brachypodium distachyon]	RecName: Full=Serine hydroxymethyltransferase 4; Short=AtSHMT4; EC=2.1.2.1; AltName: Full=Glycine hydroxymethyltransferase 4; AltName: Full=Serine methylase 4;	RecName: Full=Serine hydroxymethyltransferase {ECO:0000256|RuleBase:RU000585}; EC=2.1.2.1 {ECO:0000256|RuleBase:RU000585};	Glycine/serine hydroxymethyltransferase	GO:0005829,cytosol; GO:0016020,membrane; GO:0005886,plasma membrane; GO:0009506,plasmodesma; GO:0004372,glycine hydroxymethyltransferase activity; GO:0030170,pyridoxal phosphate binding; GO:0007623,circadian rhythm; GO:0019264,glycine biosynthetic process from serine; GO:0046686,response to cadmium ion; GO:0035999,tetrahydrofolate interconversion	Serine hydroxymethyltransferase
TRINITY_DN100809_c0_g1_i1.path1	9.54	8.14	9.15	11.72	24.33	13.78	53	56	52	60	153	79	2.026	1.018	0.00391746	0.0121564	up	1A	307746701	307747051	-	TRINITY_DN100809_c0_g1_i1	--	--	Cytochrome P450 94A1 [Triticum urartu]	--	SubName: Full=Uncharacterized protein {ECO:0000313|EnsemblPlants:HORVU1Hr1G057220.1};	--	GO:0020037,heme binding; GO:0005506,iron ion binding; GO:0004497,monooxygenase activity; GO:0016705,oxidoreductase activity, acting on paired donors, with incorporation or reduction of molecular oxygen	--
TRINITY_DN10081_c0_g1_i2.path1	0.78	0.92	0.77	7.93	6.26	8.06	48	70	48	448	434	510	9.985	3.32	4.2981e-36	2.3939e-34	up	7C	695118114	695121984	+	TRINITY_DN10081_c0_g1_i2	--	--	--	--	--	--	--	--
TRINITY_DN10081_c0_g2_i1.path1	4.28	4.22	3.55	19.05	19.87	14.75	86	105	73	353	452	306	4.872	2.285	6.37883e-23	1.73743e-21	up	1A	241653225	241654494	+	TRINITY_DN10081_c0_g2_i1	--	--	--	--	--	--	--	--
TRINITY_DN10081_c0_g2_i1.path2	3.53	4.02	3.55	22.07	22.02	15.71	71	100	73	409	501	326	5.876	2.555	8.49725e-28	3.10073e-26	up	1D	232178306	232179575	+	TRINITY_DN10081_c0_g2_i1	--	--	--	--	--	--	--	--
TRINITY_DN100812_c0_g1_i1.path1	13.85	10.51	10.56	2.41	5.88	0.81	50	47	39	8	24	3	0.28	-1.835	0.0012907	0.00456481	down	3C	606690230	606690457	+	TRINITY_DN100812_c0_g1_i1	--	--	--	--	--	--	--	--
TRINITY_DN100816_c0_g1_i1.path1	3.59	1.99	1.48	0	0.17	0.55	19	13	8	0	1	3	0.117	-3.1	0.00474691	0.0143767	down	3D	259166470	259166803	-	TRINITY_DN100816_c0_g1_i1	--	--	--	--	--	--	--	--
TRINITY_DN100817_c0_g1_i1.path1	8.5	8.5	6.5	0.4	0.16	0.18	46	57	36	2	1	1	0.034	-4.889	1.14128e-08	9.14647e-08	down	1D	284633157	284633498	-	TRINITY_DN100817_c0_g1_i1	--	--	--	--	--	--	--	--
TRINITY_DN10082_c0_g1_i1.path2	1.61	8.46	11.66	62.95	44.29	121.78	10	65	74	360	311	780	11.927	3.576	4.0272e-05	0.000193636	up	5A	441504538	441504929	-	TRINITY_DN10082_c0_g1_i1	--	--	--	--	--	--	--	--
TRINITY_DN100830_c0_g1_i1.path1	22.83	20.29	13.52	2.75	5.3	3.13	99	109	60	11	26	14	0.218	-2.196	1.11327e-07	7.8719e-07	down	3D	377071368	377071641	+	TRINITY_DN100830_c0_g1_i1	--	--	--	--	--	--	--	--
TRINITY_DN100834_c0_g1_i1.path1	3.44	3.11	0.59	0	0.54	0.2	17	19	3	0	3	1	0.118	-3.083	0.00851693	0.0239612	down	7D	406071435	406071746	+	TRINITY_DN100834_c0_g1_i1	--	--	--	--	--	--	--	--
TRINITY_DN100843_c0_g1_i1.path1	7.36	12.63	15.75	0.13	0.52	0.57	63	134	138	1	5	5	0.038	-4.72	1.47291e-15	2.36084e-14	down	5C	166676780	166677320	-	TRINITY_DN100843_c0_g1_i1	--	--	--	--	--	--	--	--
TRINITY_DN100851_c0_g1_i1.path1	0.78	0.21	0.51	142.44	135.55	251.62	3	1	2	505	590	999	414.787	8.696	1.78597e-38	1.10511e-36	up	3A	21590756	21590998	-	TRINITY_DN100851_c0_g1_i1	--	--	hypothetical protein BRADI_2g48735v3 [Brachypodium distachyon]	--	SubName: Full=Uncharacterized protein {ECO:0000313|EMBL:KQK09558.1};	--	--	--
TRINITY_DN100860_c0_g1_i1.path1	1.77	1.71	2.77	4.22	3.44	6.34	10	12	16	22	22	37	2.5	1.322	0.0184472	0.0465377	up	1A	379292563	379292988	+	TRINITY_DN100860_c0_g1_i1	--	--	hypothetical protein OsI_12930 [Oryza sativa Indica Group]	--	SubName: Full=Uncharacterized protein {ECO:0000313|EMBL:EEC75888.1};	--	GO:0003676,nucleic acid binding	Reverse transcriptase-like
TRINITY_DN100867_c0_g1_i1.path1	1.85	3.48	6.02	13.71	10.89	17.32	6	14	20	41	40	58	4.087	2.031	9.28741e-05	0.000417499	up	5A	326672296	326672500	-	TRINITY_DN100867_c0_g1_i1	--	--	--	--	--	--	--	--
TRINITY_DN100867_c0_g1_i1.path2	3.13	3.54	3.97	0.34	0.83	0.61	10	14	13	1	3	2	0.185	-2.431	0.0115136	0.0311144	down	5D	293863341	293863667	-	TRINITY_DN100867_c0_g1_i1	--	--	--	--	--	--	--	--
TRINITY_DN100876_c0_g1_i1.path1	0.85	0.23	0.7	1.08	3.77	2.34	6	2	5	7	30	17	4.488	2.166	0.00657287	0.0191161	up	4C	1131089	1140553	+	TRINITY_DN100876_c0_g1_i1	--	--	--	--	--	--	--	--
TRINITY_DN100886_c0_g1_i1.path1	5.45	5.31	12.13	0.82	1.83	1.46	29	35	66	4	11	8	0.196	-2.35	8.36506e-05	0.000379295	down	7C	186992145	186992480	+	TRINITY_DN100886_c0_g1_i1	--	--	--	--	--	--	--	--
TRINITY_DN10089_c0_g1_i4.path1	0.15	0.28	0.2	1.83	6.7	1.55	5	12	7	58	261	55	17.099	4.096	4.6118e-13	5.90992e-12	up	6A	246890532	246893794	+	TRINITY_DN10089_c0_g1_i4	--	K01904 4-coumarate--CoA ligase [EC:6.2.1.12] | (RefSeq) LOC109741493; probable 4-coumarate--CoA ligase 2 (A)	4-coumarate:coenzyme A ligase [Lolium perenne]	RecName: Full=Probable 4-coumarate--CoA ligase 2; Short=4CL 2; Short=Os4CL2; EC=6.2.1.12; AltName: Full=4-coumaroyl-CoA synthase 2;	SubName: Full=Uncharacterized protein {ECO:0000313|EnsemblPlants:TRIAE_CS42_6BL_TGACv1_502904_AA1626620.1};	Acyl-CoA synthetase	GO:0016207,4-coumarate-CoA ligase activity; GO:0005524,ATP binding; GO:0009698,phenylpropanoid metabolic process	AMP-binding enzyme
TRINITY_DN100910_c0_g1_i1.path2	0.23	0.66	0.34	4.15	4.51	9.55	2	7	3	33	44	85	16.569	4.05	5.60459e-10	5.24287e-09	up	1A	408417184	408417728	-	TRINITY_DN100910_c0_g1_i1	--	--	--	--	--	--	--	--
TRINITY_DN100927_c0_g1_i1.path1	0	0.19	0.12	1.95	1.06	5.34	0	2	1	15	10	46	29.888	4.901	1.15604e-05	6.09675e-05	up	6C	444485929	444486455	+	TRINITY_DN100927_c0_g1_i1	--	--	--	--	--	--	--	--
TRINITY_DN10093_c0_g1_i3.path1	1.14	2.02	1.33	10.36	12.95	10.68	10	22	12	84	129	97	8.276	3.049	2.54723e-15	4.00355e-14	up	7C	634865021	634865576	-	TRINITY_DN10093_c0_g1_i3	--	K14638 solute carrier family 15 (peptide/histidine transporter), member 3/4 | (RefSeq) peptide transporter PTR2 (A)	protein NRT1/ PTR FAMILY 5.2-like [Aegilops tauschii subsp. tauschii]	RecName: Full=Protein NRT1/ PTR FAMILY 5.3; Short=AtNPF5.3; AltName: Full=Peptide transporter PTR3-B;	SubName: Full=Uncharacterized protein {ECO:0000313|EMBL:EMT16581.1, ECO:0000313|EnsemblPlants:EMT16581};	H+/oligopeptide symporter	GO:0016021,integral component of membrane; GO:0022857,transmembrane transporter activity; GO:0009624,response to nematode	--
TRINITY_DN10093_c0_g2_i1.path1	1.29	1.25	2.02	0	0	0	5	6	8	0	0	0	0.033	-4.911	0.00373929	0.0116763	down	4A	344500438	344500682	+	TRINITY_DN10093_c0_g2_i1	--	--	--	--	--	--	--	--
TRINITY_DN100939_c0_g1_i1.path1	5.01	3.4	4.12	1.09	1.06	1.55	25	21	21	5	6	8	0.327	-1.612	0.0127025	0.0338209	down	1D	234528205	234528519	-	TRINITY_DN100939_c0_g1_i1	--	--	--	--	--	--	--	--
TRINITY_DN10094_c0_g1_i2.path1	2.04	4.26	5.16	138.56	96.46	129.09	24	62	62	1500	1282	1565	35.018	5.13	1.48456e-61	2.27012e-59	up	7A	405705333	405706074	-	TRINITY_DN10094_c0_g1_i2	--	K05894 12-oxophytodienoic acid reductase [EC:1.3.1.42] | (RefSeq) LOC109742120; 12-oxophytodienoate reductase 1-like (A)	predicted protein [Hordeum vulgare subsp. vulgare]	RecName: Full=12-oxophytodienoate reductase 1; EC=1.3.1.42; AltName: Full=12-oxophytodienoate-10,11-reductase 1; Short=OPDA-reductase 1; Short=OsOPR1;	SubName: Full=Uncharacterized protein {ECO:0000313|EnsemblPlants:TRIAE_CS42_7DS_TGACv1_622140_AA2033640.1};	NADH:flavin oxidoreductase/12-oxophytodienoate reductase	GO:0005622,intracellular; GO:0016629,12-oxophytodienoate reductase activity; GO:0010181,FMN binding; GO:0006952,defense response; GO:0009695,jasmonic acid biosynthetic process; GO:0031408,oxylipin biosynthetic process	--
TRINITY_DN10094_c0_g2_i1.path1	0.15	1.16	3.42	3.91	13.61	27.73	3	29	71	73	312	580	10.731	3.424	0.00692015	0.0199832	up	7D	465062382	465072483	-	TRINITY_DN10094_c0_g2_i1	--	--	--	--	--	--	--	--
TRINITY_DN10094_c0_g4_i1.path1	0.89	0.64	0.78	1.83	2.37	1.83	9	8	8	17	27	19	2.871	1.521	0.0114038	0.0308671	up	2A	407135383	407136204	+	TRINITY_DN10094_c0_g4_i1	--	K05894 12-oxophytodienoic acid reductase [EC:1.3.1.42] | (RefSeq) LOC109752455; putative 12-oxophytodienoate reductase 4 (A)	putative 12-oxophytodienoate reductase 4 [Aegilops tauschii subsp. tauschii]	RecName: Full=12-oxophytodienoate reductase 1; EC=1.3.1.42; AltName: Full=12-oxophytodienoate-10,11-reductase 1; Short=AtOPR1; Short=OPDA-reductase 1; AltName: Full=FS-AT-I;	SubName: Full=Uncharacterized protein {ECO:0000313|EnsemblPlants:TRIAE_CS42_2DS_TGACv1_177437_AA0577110.1};	NADH:flavin oxidoreductase/12-oxophytodienoate reductase	GO:0005737,cytoplasm; GO:0016629,12-oxophytodienoate reductase activity; GO:0010181,FMN binding; GO:0031408,oxylipin biosynthetic process	NADH:flavin oxidoreductase / NADH oxidase family
TRINITY_DN10095_c0_g1_i1.path1	21.28	19.55	24.43	108.41	115.75	87.25	326	371	383	1531	2007	1380	5.189	2.375	9.20558e-31	3.93785e-29	up	2D	445083393	445084360	+	TRINITY_DN10095_c0_g1_i1	--	--	--	--	--	--	--	--
TRINITY_DN100954_c0_g1_i1.path1	1.7	0.92	0.93	0.21	0.17	0	18	12	10	2	2	0	0.112	-3.156	0.00340901	0.0107702	down	3D	227880814	227881480	+	TRINITY_DN100954_c0_g1_i1	--	K13648 alpha-1,4-galacturonosyltransferase [EC:2.4.1.43] | (RefSeq) probable galacturonosyltransferase 7 (A)	probable galacturonosyltransferase 7 [Setaria italica]	--	RecName: Full=Hexosyltransferase {ECO:0000256|RuleBase:RU362027}; EC=2.4.1.- {ECO:0000256|RuleBase:RU362027};	--	GO:0000139,Golgi membrane; GO:0016021,integral component of membrane; GO:0047262,polygalacturonate 4-alpha-galacturonosyltransferase activity; GO:0071555,cell wall organization; GO:0045489,pectin biosynthetic process	--
TRINITY_DN100955_c0_g1_i1.path1	14.13	15.39	18.42	7.2	1.7	6.22	66	89	88	31	9	30	0.348	-1.522	0.00131666	0.00464605	down	2C	258226990	258227284	+	TRINITY_DN100955_c0_g1_i1	--	--	--	--	--	--	--	--
TRINITY_DN100959_c0_g1_i1.path1	0.22	0.53	0	49.74	57.96	101.79	1	3	0	209	299	479	298.062	8.219	2.51508e-24	7.50937e-23	up	7C	570838660	570838947	-	TRINITY_DN100959_c0_g1_i1	--	K22395 cinnamyl-alcohol dehydrogenase [EC:1.1.1.195] | (RefSeq) inactive tetrahydrocannabinolic acid synthase-like (A)	berberine bridge enzyme-like 27 [Aegilops tauschii subsp. tauschii]	RecName: Full=Tetrahydrocannabinolic acid synthase; Short=THCAS; EC=1.21.3.7; AltName: Full=Delta(1)-tetrahydrocannabinolic acid synthase; AltName: Full=THCA synthase; Flags: Precursor;	SubName: Full=Uncharacterized protein {ECO:0000313|EnsemblPlants:HORVU7Hr1G089160.1};	--	GO:0048046,apoplast; GO:0102778,Delta9-tetrahydrocannabinolate synthase activity; GO:0050660,flavin adenine dinucleotide binding; GO:0016614,oxidoreductase activity, acting on CH-OH group of donors	--
TRINITY_DN100959_c0_g1_i1.path2	0	0	0	60.72	85	107.37	0	0	0	256	440	507	2535.78	11.308	1.62625e-20	3.7748e-19	up	7A	5949464	5949752	+	TRINITY_DN100959_c0_g1_i1	--	K22395 cinnamyl-alcohol dehydrogenase [EC:1.1.1.195] | (RefSeq) inactive tetrahydrocannabinolic acid synthase-like (A)	berberine bridge enzyme-like 27 [Aegilops tauschii subsp. tauschii]	RecName: Full=Tetrahydrocannabinolic acid synthase; Short=THCAS; EC=1.21.3.7; AltName: Full=Delta(1)-tetrahydrocannabinolic acid synthase; AltName: Full=THCA synthase; Flags: Precursor;	SubName: Full=Uncharacterized protein {ECO:0000313|EnsemblPlants:HORVU7Hr1G089160.1};	--	GO:0048046,apoplast; GO:0102778,Delta9-tetrahydrocannabinolate synthase activity; GO:0050660,flavin adenine dinucleotide binding; GO:0016614,oxidoreductase activity, acting on CH-OH group of donors	--
TRINITY_DN10096_c0_g1_i4.path1	64.51	57.95	71.02	277.39	275.86	220.39	435	484	490	1724	2105	1534	4.352	2.122	4.61902e-26	1.5335e-24	up	6A	2335728	2400696	-	TRINITY_DN10096_c0_g1_i4	--	K08770 ubiquitin C | (RefSeq) polyubiquitin 11 (A)	PREDICTED: polyubiquitin 11, partial [Nicotiana tomentosiformis]	RecName: Full=Polyubiquitin 11; Contains: RecName: Full=Ubiquitin; Flags: Precursor;	SubName: Full=Polyubiquitin {ECO:0000313|EMBL:AFU90137.2}; Flags: Fragment;	Ubiquitin and ubiquitin-like proteins	GO:0005737,cytoplasm; GO:0005634,nucleus; GO:0006511,ubiquitin-dependent protein catabolic process	Ubiquitin family
TRINITY_DN10096_c0_g2_i1.path1	84.44	109.48	118.06	200.95	269.06	173.76	274	440	392	601	988	582	2.243	1.165	4.59026e-07	2.98803e-06	up	6A	309494736	309494940	-	TRINITY_DN10096_c0_g2_i1	--	K08770 ubiquitin C | (RefSeq) ubiquitin (A)	PREDICTED: ubiquitin, partial [Nicotiana tomentosiformis]	RecName: Full=Polyubiquitin; Contains: RecName: Full=Ubiquitin; Flags: Precursor; Fragment;	SubName: Full=Uncharacterized protein {ECO:0000313|EnsemblPlants:HORVU6Hr1G016150.4};	Ubiquitin and ubiquitin-like proteins	GO:0005737,cytoplasm; GO:0005634,nucleus	Ubiquitin family
TRINITY_DN10096_c0_g2_i1.path2	48.76	42.84	53.05	176.35	187.26	149.45	159	173	177	530	691	503	3.869	1.952	8.22691e-19	1.69012e-17	up	6A	2336177	2400696	+	TRINITY_DN10096_c0_g2_i1	--	K08770 ubiquitin C | (RefSeq) ubiquitin (A)	ubiquitin, partial [Pyrus pyrifolia var. culta]	RecName: Full=Polyubiquitin; Contains: RecName: Full=Ubiquitin; Flags: Precursor; Fragment;	SubName: Full=Ubiquitin {ECO:0000313|EMBL:BAN58176.1}; Flags: Fragment;	Ubiquitin and ubiquitin-like proteins	GO:0005737,cytoplasm; GO:0005634,nucleus	--
TRINITY_DN100960_c0_g1_i1.path1	0	0	0	5.71	3.3	9.99	0	0	0	24	17	47	192.528	7.589	1.51397e-08	1.19614e-07	up	1C	408928323	408928749	-	TRINITY_DN100960_c0_g1_i1	--	K00850 6-phosphofructokinase 1 [EC:2.7.1.11] | (RefSeq) pco064611a; uncharacterized LOC100192478 (A)	unknown [Zea mays]	RecName: Full=ATP-dependent 6-phosphofructokinase 3 {ECO:0000255|HAMAP-Rule:MF_03186}; Short=ATP-PFK 3 {ECO:0000255|HAMAP-Rule:MF_03186}; Short=Phosphofructokinase 3 {ECO:0000255|HAMAP-Rule:MF_03186}; EC=2.7.1.11 {ECO:0000255|HAMAP-Rule:MF_03186}; AltName: Full=Phosphohexokinase 3 {ECO:0000255|HAMAP-Rule:MF_03186};	SubName: Full=Uncharacterized protein {ECO:0000313|EnsemblPlants:HORVU3Hr1G019580.19};	Pyrophosphate-dependent phosphofructo-1-kinase	GO:0005829,cytosol; GO:0003872,6-phosphofructokinase activity; GO:0005524,ATP binding; GO:0046872,metal ion binding; GO:0006002,fructose 6-phosphate metabolic process; GO:0006096,glycolytic process; GO:0010053,root epidermal cell differentiation	Phosphofructokinase
TRINITY_DN100960_c0_g1_i1.path2	0	0.18	0	1.67	2.71	5.53	0	1	0	7	14	26	51.716	5.693	6.25097e-05	0.000290364	up	1D	12286733	12287159	+	TRINITY_DN100960_c0_g1_i1	--	K00850 6-phosphofructokinase 1 [EC:2.7.1.11] | (RefSeq) pco064611a; uncharacterized LOC100192478 (A)	unknown [Zea mays]	RecName: Full=ATP-dependent 6-phosphofructokinase 3 {ECO:0000255|HAMAP-Rule:MF_03186}; Short=ATP-PFK 3 {ECO:0000255|HAMAP-Rule:MF_03186}; Short=Phosphofructokinase 3 {ECO:0000255|HAMAP-Rule:MF_03186}; EC=2.7.1.11 {ECO:0000255|HAMAP-Rule:MF_03186}; AltName: Full=Phosphohexokinase 3 {ECO:0000255|HAMAP-Rule:MF_03186};	SubName: Full=Uncharacterized protein {ECO:0000313|EnsemblPlants:HORVU3Hr1G019580.19};	Pyrophosphate-dependent phosphofructo-1-kinase	GO:0005829,cytosol; GO:0003872,6-phosphofructokinase activity; GO:0005524,ATP binding; GO:0046872,metal ion binding; GO:0006002,fructose 6-phosphate metabolic process; GO:0006096,glycolytic process; GO:0010053,root epidermal cell differentiation	Phosphofructokinase
TRINITY_DN10097_c2_g1_i2.path1	0.96	1.16	0.7	4.15	3.07	3.71	8	12	6	32	29	32	4.272	2.095	0.00013197	0.000576306	up	1D	236921371	236921898	+	TRINITY_DN10097_c2_g1_i2	--	--	--	--	--	--	--	--
TRINITY_DN100973_c0_g1_i1.path2	0.57	0	0.56	4.36	1.02	4.45	2	0	2	14	4	16	9.964	3.317	0.00344463	0.0108633	up	5A	357205387	357205606	-	TRINITY_DN100973_c0_g1_i1	--	--	--	--	--	--	--	--
TRINITY_DN100977_c0_g1_i1.path1	0	0	0	2.15	0.7	0.19	0	0	0	10	4	1	31.83	4.992	0.0065474	0.0190522	up	7C	16866250	16866568	+	TRINITY_DN100977_c0_g1_i1	--	--	--	--	--	--	--	--
TRINITY_DN100981_c0_g1_i1.path1	0.19	0.05	0.06	1.17	0.73	0.49	3	1	1	17	13	8	8.706	3.122	0.00173744	0.00595331	up	4D	287325336	287326329	+	TRINITY_DN100981_c0_g1_i1	--	--	--	--	--	--	--	--
TRINITY_DN100989_c0_g1_i1.path1	3.06	0.22	4.08	0	0	0	11	1	15	0	0	0	0.022	-5.519	0.00101802	0.00369143	down	5C	357055058	357055284	-	TRINITY_DN100989_c0_g1_i1	--	--	--	--	--	--	--	--
TRINITY_DN101_c0_g1_i4.path1	0.11	0	0	3.03	3.59	8.69	2	0	0	53	77	170	179.216	7.486	2.93782e-11	3.15408e-10	up	4D	272433756	272435132	+	TRINITY_DN101_c0_g1_i4	--	--	--	--	--	--	--	--
TRINITY_DN101_c2_g1_i1.path1	19.24	36.31	23.38	49.93	42.96	53.65	74	173	92	177	187	213	2.067	1.048	0.000410475	0.00162449	up	4D	391171211	391171453	+	TRINITY_DN101_c2_g1_i1	--	--	--	--	--	--	--	--
TRINITY_DN1010_c0_g1_i5.path1	5.66	4.77	5.09	29.93	23.7	33.85	164	171	151	799	777	1012	6.261	2.646	1.28321e-25	4.12919e-24	up	7A	441682615	441685387	+	TRINITY_DN1010_c0_g1_i5	--	K00033 6-phosphogluconate dehydrogenase [EC:1.1.1.44 1.1.1.343] | (RefSeq) 6-phosphogluconate dehydrogenase, decarboxylating 1 (A)	PREDICTED: 6-phosphogluconate dehydrogenase, decarboxylating 1 [Brachypodium distachyon]	RecName: Full=6-phosphogluconate dehydrogenase, decarboxylating 1; Short=OsG6PGH1; EC=1.1.1.44;	RecName: Full=6-phosphogluconate dehydrogenase, decarboxylating {ECO:0000256|RuleBase:RU000485}; EC=1.1.1.44 {ECO:0000256|RuleBase:RU000485};	6-phosphogluconate dehydrogenase	GO:0005737,cytoplasm; GO:0004616,phosphogluconate dehydrogenase (decarboxylating) activity; GO:0019521,D-gluconate metabolic process; GO:0006098,pentose-phosphate shunt; GO:0009737,response to abscisic acid; GO:0009409,response to cold; GO:0009651,response to salt stress; GO:0009414,response to water deprivation	6-phosphogluconate dehydrogenase, C-terminal domain
TRINITY_DN1010_c0_g1_i5.path2	32.51	36.72	31.97	132.52	108.3	144.09	950	1329	956	3569	3581	4346	4.23	2.081	6.05968e-22	1.54309e-20	up	7D	522527305	522530045	+	TRINITY_DN1010_c0_g1_i5	--	K00033 6-phosphogluconate dehydrogenase [EC:1.1.1.44 1.1.1.343] | (RefSeq) 6-phosphogluconate dehydrogenase, decarboxylating 1 (A)	PREDICTED: 6-phosphogluconate dehydrogenase, decarboxylating 1 [Brachypodium distachyon]	RecName: Full=6-phosphogluconate dehydrogenase, decarboxylating 1; Short=OsG6PGH1; EC=1.1.1.44;	RecName: Full=6-phosphogluconate dehydrogenase, decarboxylating {ECO:0000256|RuleBase:RU000485}; EC=1.1.1.44 {ECO:0000256|RuleBase:RU000485};	6-phosphogluconate dehydrogenase	GO:0005737,cytoplasm; GO:0004616,phosphogluconate dehydrogenase (decarboxylating) activity; GO:0019521,D-gluconate metabolic process; GO:0006098,pentose-phosphate shunt; GO:0009737,response to abscisic acid; GO:0009409,response to cold; GO:0009651,response to salt stress; GO:0009414,response to water deprivation	6-phosphogluconate dehydrogenase, C-terminal domain
TRINITY_DN10100_c0_g2_i1.path1	1.17	1.08	1.64	0	0	0	7	8	10	0	0	0	0.025	-5.305	0.000830214	0.00307361	down	6A	54652572	54652948	+	TRINITY_DN10100_c0_g2_i1	--	--	--	--	--	--	--	--
TRINITY_DN10100_c1_g1_i1.path1	17.87	16.78	18.28	6.09	7.16	3.62	86	100	90	27	39	18	0.346	-1.532	2.02586e-05	0.000102487	down	1A	119134031	119137417	-	TRINITY_DN10100_c1_g1_i1	--	--	--	--	--	--	--	--
TRINITY_DN101000_c0_g1_i1.path1	6.2	6.35	5.32	13.94	12.55	11.57	41	52	36	85	94	79	2.34	1.226	0.000118972	0.00052342	up	7D	508842420	508842837	-	TRINITY_DN101000_c0_g1_i1	--	--	--	--	--	--	--	--
TRINITY_DN101003_c0_g1_i1.path1	13.56	10.51	14.31	65.31	45.76	54.9	50	48	54	222	191	209	4.76	2.251	7.46764e-14	1.03301e-12	up	2C	42859635	42859867	+	TRINITY_DN101003_c0_g1_i1	--	--	--	--	--	--	--	--
TRINITY_DN101007_c0_g1_i1.path1	3.72	2.4	2.47	0.16	0.26	0	25	20	17	1	2	0	0.054	-4.203	8.66124e-05	0.000391543	down	7C	407701650	407702074	+	TRINITY_DN101007_c0_g1_i1	--	--	--	--	--	--	--	--
TRINITY_DN101010_c0_g1_i1.path2	5.59	7.55	4.13	10.21	12.06	10.91	82	137	62	138	200	165	2.127	1.088	0.00011729	0.000516689	up	5A	199585988	199586913	+	TRINITY_DN101010_c0_g1_i1	--	K14007 protein transport protein SEC24 | (RefSeq) protein transport protein Sec24-like CEF (A)	PREDICTED: protein transport protein Sec24-like CEF [Brachypodium distachyon]	RecName: Full=Protein transport protein Sec24-like CEF;	SubName: Full=Uncharacterized protein {ECO:0000313|EnsemblPlants:BRADI4G07970.3};	Vesicle coat complex COPII, subunit SFB3	GO:0030127,COPII vesicle coat; GO:0005829,cytosol; GO:0005789,endoplasmic reticulum membrane; GO:0033116,endoplasmic reticulum-Golgi intermediate compartment membrane; GO:0000139,Golgi membrane; GO:0008270,zinc ion binding; GO:0006888,ER to Golgi vesicle-mediated transport; GO:0006886,intracellular protein transport; GO:0006979,response to oxidative stress	--
TRINITY_DN10102_c0_g1_i4.path1	4.66	4.64	4.99	17.86	12.09	15.9	223	275	244	787	654	785	3.54	1.824	4.00955e-14	5.67806e-13	up	6A	409466767	409474686	+	TRINITY_DN10102_c0_g1_i4	--	K17586 PHD and RING finger domain-containing protein 1 | (RefSeq) uncharacterized protein LOC112278904 (A)	sarcoplasmic reticulum histidine-rich calcium-binding protein-like [Aegilops tauschii subsp. tauschii]	RecName: Full=Methyl-CpG-binding domain-containing protein 9; Short=AtMBD9; Short=MBD09; EC=2.3.1.48; AltName: Full=Histone acetyl transferase MBD9; AltName: Full=Methyl-CpG-binding protein MBD9;	SubName: Full=Uncharacterized protein {ECO:0000313|EnsemblPlants:TRIAE_CS42_2DS_TGACv1_177580_AA0580450.2};	Topoisomerase I-binding arginine-serine-rich protein	GO:0005720,nuclear heterochromatin; GO:0005634,nucleus; GO:0009506,plasmodesma; GO:0004402,histone acetyltransferase activity; GO:0042393,histone binding; GO:0046872,metal ion binding; GO:0008327,methyl-CpG binding; GO:0061630,ubiquitin protein ligase activity; GO:0016573,histone acetylation; GO:0043966,histone H3 acetylation; GO:0043967,histone H4 acetylation; GO:0010216,maintenance of DNA methy…	PHD-finger
TRINITY_DN10102_c0_g1_i4.path2	2.56	2.17	2.08	10.45	6.5	9.37	121	127	101	456	348	458	4.283	2.099	1.70112e-14	2.49201e-13	up	7C	689448006	689452171	+	TRINITY_DN10102_c0_g1_i4	--	K17586 PHD and RING finger domain-containing protein 1 | (RefSeq) uncharacterized protein LOC112278904 (A)	sarcoplasmic reticulum histidine-rich calcium-binding protein-like [Aegilops tauschii subsp. tauschii]	RecName: Full=Methyl-CpG-binding domain-containing protein 9; Short=AtMBD9; Short=MBD09; EC=2.3.1.48; AltName: Full=Histone acetyl transferase MBD9; AltName: Full=Methyl-CpG-binding protein MBD9;	SubName: Full=Uncharacterized protein {ECO:0000313|EnsemblPlants:TRIAE_CS42_2DS_TGACv1_177580_AA0580450.2};	Topoisomerase I-binding arginine-serine-rich protein	GO:0005720,nuclear heterochromatin; GO:0005634,nucleus; GO:0009506,plasmodesma; GO:0004402,histone acetyltransferase activity; GO:0042393,histone binding; GO:0046872,metal ion binding; GO:0008327,methyl-CpG binding; GO:0061630,ubiquitin protein ligase activity; GO:0016573,histone acetylation; GO:0043966,histone H3 acetylation; GO:0043967,histone H4 acetylation; GO:0010216,maintenance of DNA methy…	PHD-finger
TRINITY_DN101025_c0_g1_i1.path1	8.68	13.61	6.41	35.48	23.9	20.63	86	167	65	324	268	211	3.066	1.616	1.04087e-07	7.38465e-07	up	7C	472241763	472242485	+	TRINITY_DN101025_c0_g1_i1	--	--	--	--	--	--	--	--
TRINITY_DN101029_c0_g1_i1.path1	0	0.21	0	9.73	11.66	6.95	0	2	0	70	103	56	132.908	7.054	1.23079e-10	1.23684e-09	up	5D	65021934	65022426	+	TRINITY_DN101029_c0_g1_i1	--	--	cation/H(+) antiporter 19 [Aegilops tauschii subsp. tauschii]	RecName: Full=Cation/H(+) antiporter 19; AltName: Full=Protein CATION/H+ EXCHANGER 19; Short=AtCHX19;	SubName: Full=Uncharacterized protein {ECO:0000313|EnsemblPlants:TRIAE_CS42_5DS_TGACv1_457287_AA1484760.2};	Predicted K+/H+-antiporter	GO:0016021,integral component of membrane; GO:0005770,late endosome; GO:0015299,solute:proton antiporter activity; GO:0015672,monovalent inorganic cation transport; GO:0006813,potassium ion transport; GO:0006885,regulation of pH	--
TRINITY_DN10103_c0_g1_i6.path1	11.27	9.46	7.18	3.38	3.39	2.85	253	263	165	70	86	66	0.378	-1.402	2.79131e-07	1.87102e-06	down	7A	69299728	69302303	+	TRINITY_DN10103_c0_g1_i6	--	--	PREDICTED: uncharacterized protein LOC100839923 [Brachypodium distachyon]	--	SubName: Full=Uncharacterized protein {ECO:0000313|EMBL:KQJ95220.1};	--	GO:0016021,integral component of membrane	--
TRINITY_DN10103_c0_g1_i6.path2	6.15	7.08	5.32	2.55	3.09	2.7	139	198	123	53	79	63	0.496	-1.012	0.000277906	0.00113899	down	7D	311633029	311635612	+	TRINITY_DN10103_c0_g1_i6	--	--	PREDICTED: uncharacterized protein LOC100839923 [Brachypodium distachyon]	--	SubName: Full=Uncharacterized protein {ECO:0000313|EMBL:KQJ95220.1};	--	GO:0016021,integral component of membrane	--
TRINITY_DN101034_c0_g1_i1.path1	2.47	1.99	3.86	0.27	0.22	0	10	10	16	1	1	0	0.062	-4.011	0.00247246	0.00812679	down	3C	629689599	629689854	+	TRINITY_DN101034_c0_g1_i1	--	K11752 diaminohydroxyphosphoribosylaminopyrimidine deaminase / 5-amino-6-(5-phosphoribosylamino)uracil reductase [EC:3.5.4.26 1.1.1.193] | (RefSeq) LOC109779407; riboflavin biosynthesis protein PYRD, chloroplastic (A)	predicted protein, partial [Hordeum vulgare subsp. vulgare]	RecName: Full=Riboflavin biosynthesis protein PYRD, chloroplastic; Includes: RecName: Full=Diaminohydroxyphosphoribosylaminopyrimidine deaminase; Short=DRAP deaminase; EC=3.5.4.26; AltName: Full=Riboflavin-specific deaminase; Includes: RecName: Full=Inactive 5-amino-6-(5-phosphoribosylamino)uracil reductase; AltName: Full=HTP reductase; Flags: Precursor;	SubName: Full=Uncharacterized protein {ECO:0000313|EnsemblPlants:HORVU4Hr1G085940.11};	--	GO:0009570,chloroplast stroma; GO:0008835,diaminohydroxyphosphoribosylaminopyrimidine deaminase activity; GO:0008270,zinc ion binding; GO:0055114,oxidation-reduction process; GO:0009231,riboflavin biosynthetic process	--
TRINITY_DN101037_c0_g1_i1.path1	37.74	25.73	25.54	3.03	2.1	0.95	270	228	187	20	17	7	0.073	-3.77	3.69722e-23	1.02655e-21	down	1D	323810764	323811289	+	TRINITY_DN101037_c0_g1_i1	--	K14652 3,4-dihydroxy 2-butanone 4-phosphate synthase / GTP cyclohydrolase II [EC:4.1.99.12 3.5.4.25] | (RefSeq) LOC109749705; probable monofunctional riboflavin biosynthesis protein RIBA 3, chloroplastic isoform X1 (A)	probable monofunctional riboflavin biosynthesis protein RIBA 3, chloroplastic isoform X2 [Aegilops tauschii subsp. tauschii]	RecName: Full=Probable monofunctional riboflavin biosynthesis protein RIBA 3, chloroplastic; Includes: RecName: Full=Inactive 3,4-dihydroxy-2-butanone 4-phosphate synthase; Short=DHBP synthase; Includes: RecName: Full=GTP cyclohydrolase-2; EC=3.5.4.25; AltName: Full=GTP cyclohydrolase II; Flags: Precursor;	SubName: Full=Uncharacterized protein {ECO:0000313|EnsemblPlants:HORVU1Hr1G072180.7};	Bifunctional GTP cyclohydrolase II/3,4-dihydroxy-2butanone-4-phosphate synthase	GO:0009507,chloroplast; GO:0005737,cytoplasm; GO:0008686,3,4-dihydroxy-2-butanone-4-phosphate synthase activity; GO:0005525,GTP binding; GO:0003935,GTP cyclohydrolase II activity; GO:0046872,metal ion binding; GO:0009231,riboflavin biosynthetic process	GTP cyclohydrolase II
TRINITY_DN101037_c0_g1_i1.path2	33.48	32.8	52.98	3.19	4.08	5.29	239	290	387	21	33	39	0.116	-3.106	2.59782e-19	5.50699e-18	down	1A	329856333	329856853	+	TRINITY_DN101037_c0_g1_i1	--	K14652 3,4-dihydroxy 2-butanone 4-phosphate synthase / GTP cyclohydrolase II [EC:4.1.99.12 3.5.4.25] | (RefSeq) LOC109749705; probable monofunctional riboflavin biosynthesis protein RIBA 3, chloroplastic isoform X1 (A)	probable monofunctional riboflavin biosynthesis protein RIBA 3, chloroplastic isoform X2 [Aegilops tauschii subsp. tauschii]	RecName: Full=Probable monofunctional riboflavin biosynthesis protein RIBA 3, chloroplastic; Includes: RecName: Full=Inactive 3,4-dihydroxy-2-butanone 4-phosphate synthase; Short=DHBP synthase; Includes: RecName: Full=GTP cyclohydrolase-2; EC=3.5.4.25; AltName: Full=GTP cyclohydrolase II; Flags: Precursor;	SubName: Full=Uncharacterized protein {ECO:0000313|EnsemblPlants:HORVU1Hr1G072180.7};	Bifunctional GTP cyclohydrolase II/3,4-dihydroxy-2butanone-4-phosphate synthase	GO:0009507,chloroplast; GO:0005737,cytoplasm; GO:0008686,3,4-dihydroxy-2-butanone-4-phosphate synthase activity; GO:0005525,GTP binding; GO:0003935,GTP cyclohydrolase II activity; GO:0046872,metal ion binding; GO:0009231,riboflavin biosynthetic process	GTP cyclohydrolase II
TRINITY_DN101041_c0_g1_i1.path1	12.73	14.68	9.99	1.97	2.61	5.28	56	80	45	8	13	24	0.299	-1.744	0.000297035	0.00120945	down	3A	353996744	353997021	-	TRINITY_DN101041_c0_g1_i1	--	--	PREDICTED: serine/threonine-protein kinase HT1-like [Brachypodium distachyon]	--	SubName: Full=Uncharacterized protein {ECO:0000313|EnsemblPlants:HORVU3Hr1G026870.4};	--	GO:0005524,ATP binding; GO:0004672,protein kinase activity	TMC domain
TRINITY_DN101041_c0_g1_i1.path2	9.54	12.66	9.55	0.99	0.8	1.1	42	69	43	4	4	5	0.1	-3.32	1.33938e-08	1.06488e-07	down	3C	79953770	79954047	+	TRINITY_DN101041_c0_g1_i1	--	--	PREDICTED: serine/threonine-protein kinase HT1-like [Brachypodium distachyon]	--	SubName: Full=Uncharacterized protein {ECO:0000313|EnsemblPlants:HORVU3Hr1G026870.4};	--	GO:0005524,ATP binding; GO:0004672,protein kinase activity	--
TRINITY_DN101043_c0_g1_i1.path1	12.95	10.98	11.89	1.42	1.96	0.76	99	104	93	10	17	6	0.126	-2.988	2.28572e-12	2.73139e-11	down	3D	62523931	62524413	+	TRINITY_DN101043_c0_g1_i1	--	--	uncharacterized protein LOC109758135 [Aegilops tauschii subsp. tauschii]	--	SubName: Full=Uncharacterized protein {ECO:0000313|EnsemblPlants:TRIAE_CS42_2BL_TGACv1_130718_AA0416600.1};	--	--	--
TRINITY_DN101046_c0_g1_i1.path1	1.1	0.89	1.3	4.79	2.93	3	5	5	6	20	15	14	3.561	1.832	0.00949334	0.026346	up	7C	58556973	58557407	-	TRINITY_DN101046_c0_g1_i1	--	--	--	--	--	--	--	--
TRINITY_DN101047_c0_g1_i1.path1	2.64	4.38	2.07	5.88	7.94	8.58	20	41	16	41	68	67	2.745	1.457	0.000545829	0.00210356	up	2D	379986466	379986943	+	TRINITY_DN101047_c0_g1_i1	--	--	hypothetical protein CFOL_v3_36345, partial [Cephalotus follicularis]	RecName: Full=Elicitor-responsive protein 3; Short=OsERG3 {ECO:0000303|PubMed:23456295}; AltName: Full=16 kDa phloem protein; AltName: Full=RPP16;	SubName: Full=Uncharacterized protein {ECO:0000313|EnsemblPlants:TRIAE_CS42_2BL_TGACv1_130572_AA0413860.2};	--	GO:0005737,cytoplasm; GO:0006952,defense response	--
TRINITY_DN101049_c0_g1_i1.path1	6.73	6.55	5.23	2.43	2.9	1.51	39	47	31	13	19	9	0.403	-1.312	0.00667661	0.0193767	down	2D	371967631	371967996	-	TRINITY_DN101049_c0_g1_i1	--	--	Calcium-dependent protein kinase 29 [Triticum urartu]	--	SubName: Full=Calcium-dependent protein kinase 29 {ECO:0000313|EMBL:EMS64675.1, ECO:0000313|EnsemblPlants:TRIUR3_23124-P1};	--	GO:0005737,cytoplasm; GO:0005634,nucleus; GO:0005886,plasma membrane; GO:0005524,ATP binding; GO:0005509,calcium ion binding; GO:0004674,protein serine/threonine kinase activity; GO:0050832,defense response to fungus; GO:1901002,positive regulation of response to salt stress	--
TRINITY_DN10105_c0_g1_i1.path1	7.15	5.52	4.33	2.24	2.62	2.39	229	219	142	66	95	79	0.47	-1.089	0.000141051	0.000612943	down	7A	324387834	324391648	+	TRINITY_DN10105_c0_g1_i1	--	--	--	--	--	--	--	--
TRINITY_DN101056_c0_g1_i1.path1	0.46	1.1	1.23	0.12	0	0	4	12	11	1	0	0	0.047	-4.411	0.00455255	0.0138684	down	7A	142820355	142820908	-	TRINITY_DN101056_c0_g1_i1	--	--	--	--	--	--	--	--
TRINITY_DN101056_c0_g1_i1.path2	1.48	2.11	2.11	0	0	0	13	23	19	0	0	0	0.012	-6.407	4.01392e-06	2.27218e-05	down	1D	231162292	231162846	-	TRINITY_DN101056_c0_g1_i1	--	--	--	--	--	--	--	--
TRINITY_DN101074_c0_g1_i1.path1	8.11	5.19	4.1	12.13	15.07	18.42	29	23	15	40	61	68	2.931	1.551	0.000361543	0.00144918	up	2C	440251741	440251966	-	TRINITY_DN101074_c0_g1_i1	--	--	UDP-glycosyltransferase 85A2 [Triticum urartu]	--	RecName: Full=Glycosyltransferase {ECO:0000256|RuleBase:RU362057}; EC=2.4.1.- {ECO:0000256|RuleBase:RU362057};	--	GO:0016758,transferase activity, transferring hexosyl groups; GO:0008152,metabolic process	--
TRINITY_DN101076_c0_g1_i1.path1	1.93	1.56	2.33	10.11	9.74	9.8	17	17	21	82	97	89	5.616	2.489	4.33255e-11	4.56052e-10	up	5A	181475316	181475871	-	TRINITY_DN101076_c0_g1_i1	--	--	--	--	--	--	--	--
TRINITY_DN10108_c0_g1_i2.path1	3.97	3.65	2.48	1.04	1.04	1.57	108	123	69	26	32	44	0.404	-1.309	0.000400212	0.00158777	down	1A	364541249	364544991	+	TRINITY_DN10108_c0_g1_i2	--	K06889 uncharacterized protein | (RefSeq) uncharacterized protein LOC109732744 isoform X1 (A)	uncharacterized protein LOC109732744 isoform X1 [Aegilops tauschii subsp. tauschii]	--	SubName: Full=Uncharacterized protein {ECO:0000313|EnsemblPlants:TRIAE_CS42_1DL_TGACv1_061203_AA0188710.5};	Predicted esterase	--	Serine aminopeptidase, S33
TRINITY_DN101081_c0_g1_i1.path1	0	0.61	0	1.1	4.47	2.2	0	3	0	4	20	9	13.096	3.711	0.00382368	0.0119007	up	7A	278422310	278422559	-	TRINITY_DN101081_c0_g1_i1	--	--	hypothetical protein TRIUR3_10159 [Triticum urartu]	--	SubName: Full=Uncharacterized protein {ECO:0000313|EMBL:EMS55720.1, ECO:0000313|EnsemblPlants:TRIUR3_10159-P1};	--	--	--
TRINITY_DN101081_c0_g1_i1.path2	0	0	0	0.82	0.45	1.96	0	0	0	3	2	8	28.673	4.842	0.00864314	0.0242723	up	7D	123268708	123268957	+	TRINITY_DN101081_c0_g1_i1	--	--	hypothetical protein TRIUR3_10159 [Triticum urartu]	--	SubName: Full=Uncharacterized protein {ECO:0000313|EMBL:EMS55720.1, ECO:0000313|EnsemblPlants:TRIUR3_10159-P1};	--	--	--
TRINITY_DN10109_c0_g1_i2.path1	1.04	0.71	0.76	0.15	0.48	0.17	53	45	40	7	28	9	0.349	-1.518	0.00368097	0.0115146	down	4D	172358955	172366346	+	TRINITY_DN10109_c0_g1_i2	--	K03352 anaphase-promoting complex subunit 5 | (RefSeq) anaphase-promoting complex subunit 5 (A)	PREDICTED: anaphase-promoting complex subunit 5 [Brachypodium distachyon]	RecName: Full=Anaphase-promoting complex subunit 5; AltName: Full=Cyclosome subunit 5;	SubName: Full=Uncharacterized protein {ECO:0000313|EMBL:KQJ85698.1, ECO:0000313|EnsemblPlants:BRADI4G01090.1};	Anaphase-promoting complex (APC), subunit 5	GO:0005634,nucleus; GO:0007049,cell cycle; GO:0051301,cell division; GO:0016567,protein ubiquitination	Anaphase-promoting complex subunit 5
TRINITY_DN10109_c0_g1_i2.path2	1.98	2.82	2.01	0.8	1.06	0.4	102	180	106	38	62	21	0.36	-1.475	3.08658e-05	0.000151466	down	4C	7000390	7007927	-	TRINITY_DN10109_c0_g1_i2	--	K03352 anaphase-promoting complex subunit 5 | (RefSeq) anaphase-promoting complex subunit 5 (A)	PREDICTED: anaphase-promoting complex subunit 5 [Brachypodium distachyon]	RecName: Full=Anaphase-promoting complex subunit 5; AltName: Full=Cyclosome subunit 5;	SubName: Full=Uncharacterized protein {ECO:0000313|EMBL:KQJ85698.1, ECO:0000313|EnsemblPlants:BRADI4G01090.1};	Anaphase-promoting complex (APC), subunit 5	GO:0005634,nucleus; GO:0007049,cell cycle; GO:0051301,cell division; GO:0016567,protein ubiquitination	Anaphase-promoting complex subunit 5
TRINITY_DN10111_c0_g1_i6.path2	3.64	3.01	3.56	1.13	1.13	0.9	185	189	185	53	65	47	0.337	-1.568	2.71735e-08	2.08453e-07	down	1D	421605226	421612314	-	TRINITY_DN10111_c0_g1_i6	--	--	--	--	--	--	--	--
TRINITY_DN101112_c0_g1_i1.path1	32.21	22	23.61	132.72	163.38	126.31	104	88	78	395	597	421	5.949	2.573	5.42853e-25	1.68286e-23	up	7D	316171149	316171352	-	TRINITY_DN101112_c0_g1_i1	--	--	--	--	--	--	--	--
TRINITY_DN101116_c0_g1_i1.path1	0.96	1.49	0.94	2.85	3.33	1.95	11	21	11	30	43	23	2.608	1.383	0.00561503	0.0166566	up	7D	40072526	40073246	-	TRINITY_DN101116_c0_g1_i1	--	--	--	--	--	--	--	--
TRINITY_DN10112_c0_g1_i1.path1	19.17	19.8	20.51	59.27	58.6	68.73	763	976	835	2174	2639	2823	3.471	1.796	8.29694e-18	1.59376e-16	up	4D	373967774	373973682	-	TRINITY_DN10112_c0_g1_i1	--	K05677 ATP-binding cassette, subfamily D (ALD), member 3 | (RefSeq) ABC transporter D family member 1-like (A)	PREDICTED: ABC transporter D family member 1-like [Brachypodium distachyon]	RecName: Full=ABC transporter D family member 1; Short=ABC transporter ABCD.1; Short=AtABCD1; EC=3.6.3.47; AltName: Full=Peroxisomal ABC transporter 1; Short=AtPXA1; AltName: Full=Protein ACETATE NON-UTILIZING 2; AltName: Full=Protein COMATOSE; AltName: Full=Protein PEROXISOME DEFECTIVE 3; Short=Ped3p;	SubName: Full=Uncharacterized protein {ECO:0000313|EnsemblPlants:TRIAE_CS42_3AL_TGACv1_195481_AA0650090.2};	Long-chain acyl-CoA transporter, ABC superfamily (involved in peroxisome organization and biogenesis)	GO:0046861,glyoxysomal membrane; GO:0016021,integral component of membrane; GO:0005524,ATP binding; GO:0042626,ATPase activity, coupled to transmembrane movement of substances; GO:0005324,long-chain fatty acid transporter activity; GO:0016042,lipid catabolic process	ABC transporter transmembrane region 2
TRINITY_DN10112_c0_g1_i1.path2	17.35	17.11	17.65	56.83	48.39	59.44	678	828	706	2047	2140	2398	3.495	1.805	1.06535e-17	2.02886e-16	up	4D	418449290	418455807	-	TRINITY_DN10112_c0_g1_i1	--	K05677 ATP-binding cassette, subfamily D (ALD), member 3 | (RefSeq) ABC transporter D family member 1-like (A)	unnamed protein product [Triticum aestivum]	RecName: Full=ABC transporter D family member 1; Short=ABC transporter ABCD.1; Short=AtABCD1; EC=3.6.3.47; AltName: Full=Peroxisomal ABC transporter 1; Short=AtPXA1; AltName: Full=Protein ACETATE NON-UTILIZING 2; AltName: Full=Protein COMATOSE; AltName: Full=Protein PEROXISOME DEFECTIVE 3; Short=Ped3p;	SubName: Full=Uncharacterized protein {ECO:0000313|EnsemblPlants:TRIAE_CS42_3AL_TGACv1_195481_AA0650090.2};	Long-chain acyl-CoA transporter, ABC superfamily (involved in peroxisome organization and biogenesis)	GO:0046861,glyoxysomal membrane; GO:0016021,integral component of membrane; GO:0005524,ATP binding; GO:0042626,ATPase activity, coupled to transmembrane movement of substances; GO:0005324,long-chain fatty acid transporter activity; GO:0016042,lipid catabolic process	ABC transporter transmembrane region 2
TRINITY_DN101121_c0_g1_i1.path2	0.75	0.6	0.91	4.04	2.8	2.89	4	4	5	20	17	16	4.735	2.243	0.00181126	0.00617105	up	7A	389037323	389037661	-	TRINITY_DN101121_c0_g1_i1	--	--	--	--	--	--	--	--
TRINITY_DN101126_c0_g1_i1.path1	9.13	10.34	6.52	2.48	4.96	3.4	52	73	38	13	32	20	0.462	-1.114	0.0100717	0.0277231	down	1D	307284172	307284531	-	TRINITY_DN101126_c0_g1_i1	--	--	--	--	--	--	--	--
TRINITY_DN101127_c0_g1_i1.path1	0.39	1.06	0.51	2.57	0.58	3.56	3	10	4	18	5	28	3.86	1.949	0.017073	0.0436399	up	Chr00	117009149	117009629	+	TRINITY_DN101127_c0_g1_i1	--	K04733 interleukin-1 receptor-associated kinase 4 [EC:2.7.11.1] | (RefSeq) strubbelig-receptor family protein (A)	protein STRUBBELIG-RECEPTOR FAMILY 7 [Sorghum bicolor]	RecName: Full=Protein STRUBBELIG-RECEPTOR FAMILY 4; AltName: Full=Leucine-rich repeat receptor kinase-like protein SRF4; Flags: Precursor;	SubName: Full=Uncharacterized protein {ECO:0000313|EnsemblPlants:HORVU4Hr1G077420.13};	--	GO:0016021,integral component of membrane; GO:0005886,plasma membrane; GO:0005524,ATP binding; GO:0004675,transmembrane receptor protein serine/threonine kinase activity; GO:0007166,cell surface receptor signaling pathway; GO:0006468,protein phosphorylation	--
TRINITY_DN101134_c0_g1_i1.path1	10.83	12.32	5.1	2.66	1.54	3.06	137	193	66	31	22	40	0.289	-1.791	1.25855e-05	6.59699e-05	down	1C	191883244	191884042	+	TRINITY_DN101134_c0_g1_i1	--	--	predicted protein [Hordeum vulgare subsp. vulgare]	--	SubName: Full=Uncharacterized protein {ECO:0000313|EnsemblPlants:HORVU3Hr1G049440.1};	--	--	--
TRINITY_DN101135_c0_g1_i1.path1	0	0.11	0.14	1.54	1.76	1.51	0	1	1	10	14	11	20.439	4.353	0.000778226	0.00289692	up	5C	433848084	433848528	+	TRINITY_DN101135_c0_g1_i1	--	--	--	--	--	--	--	--
TRINITY_DN101148_c0_g1_i1.path2	0.91	0.49	0.59	4.26	4.01	1.76	3	2	2	13	15	6	5.49	2.457	0.00880047	0.0246472	up	5D	94447663	94447871	-	TRINITY_DN101148_c0_g1_i1	--	--	--	--	--	--	--	--
TRINITY_DN101153_c0_g1_i1.path1	0	0.38	1.03	8.11	4.23	14.48	0	4	9	64	41	128	21.418	4.421	0.000164699	0.000706768	up	2D	298411084	298411624	+	TRINITY_DN101153_c0_g1_i1	--	K04733 interleukin-1 receptor-associated kinase 4 [EC:2.7.11.1] | (RefSeq) cysteine-rich receptor-like protein kinase 15 (A)	Os07g0534300, partial [Oryza sativa Japonica Group]	RecName: Full=Cysteine-rich receptor-like protein kinase 19; Short=Cysteine-rich RLK19; EC=2.7.11.-; Flags: Precursor;	SubName: Full=Uncharacterized protein {ECO:0000313|EnsemblPlants:HORVU2Hr1G044910.77};	--	GO:0016021,integral component of membrane; GO:0005886,plasma membrane; GO:0005524,ATP binding; GO:0004674,protein serine/threonine kinase activity; GO:0042742,defense response to bacterium; GO:0006468,protein phosphorylation; GO:0009751,response to salicylic acid	--
TRINITY_DN101153_c0_g1_i1.path2	1.06	1.05	0.58	12.4	9.69	29.35	9	11	5	97	93	257	21.992	4.459	3.20116e-17	5.88681e-16	up	2C	105928327	105928862	-	TRINITY_DN101153_c0_g1_i1	--	K04733 interleukin-1 receptor-associated kinase 4 [EC:2.7.11.1] | (RefSeq) cysteine-rich receptor-like protein kinase 15 (A)	G-type lectin S-receptor-like serine/threonine-protein kinase SD1-13 [Triticum urartu]	RecName: Full=Cysteine-rich receptor-like protein kinase 4; Short=Cysteine-rich RLK4; EC=2.7.11.-; Flags: Precursor;	SubName: Full=Uncharacterized protein {ECO:0000313|EnsemblPlants:HORVU2Hr1G044910.77};	--	GO:0016021,integral component of membrane; GO:0005886,plasma membrane; GO:0005524,ATP binding; GO:0004674,protein serine/threonine kinase activity; GO:0042742,defense response to bacterium; GO:0012501,programmed cell death; GO:0006468,protein phosphorylation; GO:0009751,response to salicylic acid	Domain of unknown function (DUF3403)
TRINITY_DN101161_c0_g1_i1.path1	38.5	38.31	44.78	185.04	101.59	198.59	142	175	169	629	424	756	4.446	2.152	1.35839e-12	1.66011e-11	up	Chr00	153245501	153245733	-	TRINITY_DN101161_c0_g1_i1	--	--	--	--	--	--	--	--
TRINITY_DN101162_c0_g1_i1.path1	6.36	8.07	8.14	0	0.94	0.15	42	66	55	0	7	1	0.055	-4.183	3.84269e-09	3.27762e-08	down	1A	445767742	445769026	-	TRINITY_DN101162_c0_g1_i1	--	--	--	--	--	--	--	--
TRINITY_DN101166_c0_g1_i1.path1	6.85	6.13	7.97	0	0	0.18	37	41	44	0	0	1	0.01	-6.623	2.37986e-07	1.61169e-06	down	7C	542315024	542315364	+	TRINITY_DN101166_c0_g1_i1	--	--	--	--	--	--	--	--
TRINITY_DN101178_c0_g1_i1.path1	0.63	0	0	2.39	3.06	6.39	2	0	0	7	11	21	22.728	4.506	0.000629634	0.00239325	up	4D	396399275	396399475	+	TRINITY_DN101178_c0_g1_i1	--	--	--	--	--	--	--	--
TRINITY_DN101186_c0_g1_i1.path1	14.7	10.63	8.36	2.86	2.13	1.06	67	60	39	12	11	5	0.194	-2.365	3.20639e-06	1.84011e-05	down	6C	267878891	267879178	+	TRINITY_DN101186_c0_g1_i1	--	--	--	--	--	--	--	--
TRINITY_DN10119_c0_g1_i3.path1	3.09	3.35	1.83	0.84	1.26	0.67	76	102	46	19	35	17	0.368	-1.443	0.000384308	0.00153159	down	5D	394286888	394288905	+	TRINITY_DN10119_c0_g1_i3	--	K00927 phosphoglycerate kinase [EC:2.7.2.3] | (RefSeq) uncharacterized protein LOC109779783 isoform X1 (A)	uncharacterized protein LOC109779783 isoform X1 [Aegilops tauschii subsp. tauschii]	RecName: Full=Phosphoglycerate kinase 2, chloroplastic; EC=2.7.2.3; Flags: Precursor;	RecName: Full=Phosphoglycerate kinase {ECO:0000256|RuleBase:RU000532}; EC=2.7.2.3 {ECO:0000256|RuleBase:RU000532};	3-phosphoglycerate kinase	GO:0009507,chloroplast; GO:0009570,chloroplast stroma; GO:0016020,membrane; GO:0005739,mitochondrion; GO:0009536,plastid; GO:0009579,thylakoid; GO:0005524,ATP binding; GO:0004618,phosphoglycerate kinase activity; GO:0004672,protein kinase activity; GO:0006096,glycolytic process; GO:0019253,reductive pentose-phosphate cycle; GO:0050691,regulation of defense response to virus by host; GO:0046686,re…	Phosphoglycerate kinase
TRINITY_DN1012_c0_g1_i3.path1	6.07	7.12	5.6	12.74	12.78	11.02	232	337	219	449	553	435	2.138	1.097	5.48576e-08	4.03747e-07	up	2D	485762223	485770357	+	TRINITY_DN1012_c0_g1_i3	--	K14488 SAUR family protein | (RefSeq) uncharacterized protein LOC110273994 (A)	PREDICTED: polyadenylate-binding protein-interacting protein 4-like [Brachypodium distachyon]	RecName: Full=Polyadenylate-binding protein-interacting protein 4; Short=PABP-interacting protein 4; Short=Poly(A)-binding protein-interacting protein 4; AltName: Full=PAM2-containing protein CID4; AltName: Full=Protein CTC-INTERACTING DOMAIN 4;	SubName: Full=Uncharacterized protein {ECO:0000313|EMBL:KQK20696.1};	Protein interacting with poly(A)-binding protein	GO:0010494,cytoplasmic stress granule; GO:0003729,mRNA binding; GO:0010603,regulation of cytoplasmic mRNA processing body assembly; GO:0034063,stress granule assembly	Ataxin 2 SM domain
TRINITY_DN1012_c0_g1_i3.path2	7	8.14	6.89	15.34	15.12	15.19	268	386	270	541	655	600	2.286	1.193	3.59324e-09	3.07612e-08	up	Chr00	124753490	124761655	+	TRINITY_DN1012_c0_g1_i3	--	K14488 SAUR family protein | (RefSeq) uncharacterized protein LOC110273994 (A)	PREDICTED: polyadenylate-binding protein-interacting protein 4-like [Brachypodium distachyon]	RecName: Full=Polyadenylate-binding protein-interacting protein 4; Short=PABP-interacting protein 4; Short=Poly(A)-binding protein-interacting protein 4; AltName: Full=PAM2-containing protein CID4; AltName: Full=Protein CTC-INTERACTING DOMAIN 4;	SubName: Full=Uncharacterized protein {ECO:0000313|EMBL:KQK20696.1};	Protein interacting with poly(A)-binding protein	GO:0010494,cytoplasmic stress granule; GO:0003729,mRNA binding; GO:0010603,regulation of cytoplasmic mRNA processing body assembly; GO:0034063,stress granule assembly	Ataxin 2 SM domain
TRINITY_DN1012_c0_g1_i3.path3	6.92	6.93	6.79	12.53	12.6	13.26	263	326	264	439	542	520	2.053	1.037	9.51926e-07	5.92273e-06	up	6C	506866654	506874550	+	TRINITY_DN1012_c0_g1_i3	--	K14488 SAUR family protein | (RefSeq) uncharacterized protein LOC110273994 (A)	PREDICTED: polyadenylate-binding protein-interacting protein 4-like [Brachypodium distachyon]	RecName: Full=Polyadenylate-binding protein-interacting protein 4; Short=PABP-interacting protein 4; Short=Poly(A)-binding protein-interacting protein 4; AltName: Full=PAM2-containing protein CID4; AltName: Full=Protein CTC-INTERACTING DOMAIN 4;	SubName: Full=Uncharacterized protein {ECO:0000313|EMBL:KQK20696.1};	Protein interacting with poly(A)-binding protein	GO:0010494,cytoplasmic stress granule; GO:0003729,mRNA binding; GO:0010603,regulation of cytoplasmic mRNA processing body assembly; GO:0034063,stress granule assembly	Ataxin 2 SM domain
TRINITY_DN10120_c0_g1_i2.path2	0.43	4.62	5.01	0.23	1.14	0.94	8	106	95	4	24	18	0.256	-1.963	0.00498013	0.0149953	down	5A	383311514	383314547	-	TRINITY_DN10120_c0_g1_i2	--	--	PREDICTED: protein FLUORESCENT IN BLUE LIGHT, chloroplastic isoform X2 [Brachypodium distachyon]	RecName: Full=Protein FLUORESCENT IN BLUE LIGHT, chloroplastic; Flags: Precursor;	SubName: Full=Uncharacterized protein {ECO:0000313|EMBL:KQJ89694.1, ECO:0000313|EnsemblPlants:BRADI4G27210.2};	--	GO:0031969,chloroplast membrane; GO:0009535,chloroplast thylakoid membrane; GO:0016021,integral component of membrane	Tetratricopeptide repeat
TRINITY_DN101200_c0_g1_i1.path1	1.55	50.07	99.24	209.13	370.81	606.04	12	480	786	1492	3248	4842	8.753	3.13	0.0175244	0.044577	up	7D	467849799	467850287	-	TRINITY_DN101200_c0_g1_i1	--	--	--	--	--	--	--	--
TRINITY_DN101211_c0_g1_i1.path1	0.76	0.2	0	2.2	2.02	1.72	3	1	0	8	9	7	6.889	2.784	0.0185249	0.0466938	up	6C	564865365	564865613	-	TRINITY_DN101211_c0_g1_i1	--	--	--	--	--	--	--	--
TRINITY_DN10123_c0_g1_i1.path1	9.45	8.53	7.65	3.09	4.89	3.47	169	189	140	51	99	64	0.491	-1.026	0.000336709	0.00135776	down	6D	271650005	271651284	-	TRINITY_DN10123_c0_g1_i1	--	K00627 pyruvate dehydrogenase E2 component (dihydrolipoamide acetyltransferase) [EC:2.3.1.12] | (RefSeq) LOC109752264; dihydrolipoyllysine-residue acetyltransferase component 2 of pyruvate dehydrogenase complex, mitochondrial-like (A)	Dihydrolipoyllysine-residue acetyltransferase component 2 of pyruvate dehydrogenase complex mitochondrial [Zea mays]	RecName: Full=Dihydrolipoyllysine-residue acetyltransferase component 3 of pyruvate dehydrogenase complex, mitochondrial; EC=2.3.1.12; AltName: Full=Dihydrolipoamide S-acetyltransferase component 3 of pyruvate dehydrogenase complex; AltName: Full=Pyruvate dehydrogenase complex component E2 3; Short=PDC-E2 3; Short=PDCE2 3; Flags: Precursor;	RecName: Full=Acetyltransferase component of pyruvate dehydrogenase complex {ECO:0000256|RuleBase:RU361137}; EC=2.3.1.12 {ECO:0000256|RuleBase:RU361137};	Dihydrolipoamide acetyltransferase	GO:0005759,mitochondrial matrix; GO:0005739,mitochondrion; GO:0045254,pyruvate dehydrogenase complex; GO:0004742,dihydrolipoyllysine-residue acetyltransferase activity; GO:0006096,glycolytic process	2-oxoacid dehydrogenases acyltransferase (catalytic domain)
TRINITY_DN10123_c0_g4_i3.path1	121.58	106.49	97.38	242.18	255.24	299.26	1097	1190	899	2014	2606	2787	2.716	1.442	3.14329e-11	3.36498e-10	up	5A	344600355	344600924	-	TRINITY_DN10123_c0_g4_i3	--	K08867 WNK lysine deficient protein kinase [EC:2.7.11.1] | (RefSeq) LOC109753438; probable serine/threonine-protein kinase WNK8 (A)	predicted protein [Hordeum vulgare subsp. vulgare]	RecName: Full=Probable serine/threonine-protein kinase WNK8; Short=OsWNK8; EC=2.7.11.1; AltName: Full=Protein kinase with no lysine 8;	SubName: Full=Uncharacterized protein {ECO:0000313|EnsemblPlants:HORVU5Hr1G046590.9};	Serine/threonine protein kinase	GO:0005829,cytosol; GO:0005524,ATP binding; GO:0004674,protein serine/threonine kinase activity; GO:0035556,intracellular signal transduction; GO:0006468,protein phosphorylation	--
TRINITY_DN10123_c0_g4_i3.path2	50.36	43.52	41.56	86.76	99.26	130.75	456	488	385	724	1017	1222	2.609	1.383	4.31749e-08	3.22453e-07	up	5D	312456709	312545514	+	TRINITY_DN10123_c0_g4_i3	--	K08867 WNK lysine deficient protein kinase [EC:2.7.11.1] | (RefSeq) LOC109753438; probable serine/threonine-protein kinase WNK8 (A)	predicted protein, partial [Hordeum vulgare subsp. vulgare]	RecName: Full=Probable serine/threonine-protein kinase WNK8; Short=OsWNK8; EC=2.7.11.1; AltName: Full=Protein kinase with no lysine 8;	SubName: Full=Uncharacterized protein {ECO:0000313|EnsemblPlants:HORVU5Hr1G046590.9};	Serine/threonine protein kinase	GO:0005829,cytosol; GO:0005524,ATP binding; GO:0004674,protein serine/threonine kinase activity; GO:0035556,intracellular signal transduction; GO:0006468,protein phosphorylation	--
TRINITY_DN101247_c0_g1_i1.path1	1.23	5.36	4.73	5.04	4.11	17.18	13	70	51	49	49	187	2.7	1.433	0.0133589	0.0353171	up	1D	65857183	65858022	-	TRINITY_DN101247_c0_g1_i1	--	K13424 WRKY transcription factor 33 | (RefSeq) LOC109736602; probable WRKY transcription factor 26 (A)	WRKY transcription factor, partial [Triticum aestivum]	RecName: Full=Probable WRKY transcription factor 26; AltName: Full=SPF1-like protein; AltName: Full=WRKY DNA-binding protein 26;	SubName: Full=WRKY transcription factor {ECO:0000313|EMBL:ANJ45122.1}; Flags: Fragment;	--	GO:0005634,nucleus; GO:0003700,DNA-binding transcription factor activity; GO:0043565,sequence-specific DNA binding; GO:0070370,cellular heat acclimation; GO:0034605,cellular response to heat; GO:0006351,transcription, DNA-templated	WRKY DNA -binding domain
TRINITY_DN10125_c0_g1_i4.path1	8.26	10.21	6.7	0.54	2.52	0.67	348	533	289	21	120	29	0.16	-2.64	2.74055e-10	2.64976e-09	down	5D	339612602	339619231	-	TRINITY_DN10125_c0_g1_i4	--	K04733 interleukin-1 receptor-associated kinase 4 [EC:2.7.11.1] | (RefSeq) uncharacterized protein LOC112520514 isoform X1 (A)	uncharacterized protein LOC109734571 isoform X2 [Aegilops tauschii subsp. tauschii]	--	SubName: Full=Uncharacterized protein {ECO:0000313|EnsemblPlants:TRIAE_CS42_1DS_TGACv1_080190_AA0242610.2};	--	--	--
TRINITY_DN10125_c0_g1_i4.path2	4.82	5.6	3.09	0.64	2	0.91	204	294	134	25	96	40	0.29	-1.787	2.23735e-06	1.31537e-05	down	5A	377101892	377108516	-	TRINITY_DN10125_c0_g1_i4	--	K04733 interleukin-1 receptor-associated kinase 4 [EC:2.7.11.1] | (RefSeq) uncharacterized protein LOC112520514 isoform X1 (A)	uncharacterized protein LOC109734571 isoform X2 [Aegilops tauschii subsp. tauschii]	--	SubName: Full=Uncharacterized protein {ECO:0000313|EnsemblPlants:TRIAE_CS42_1DS_TGACv1_080190_AA0242610.2};	--	--	--
TRINITY_DN101250_c0_g1_i1.path1	26.89	31.83	11.99	4.81	15.23	4.81	103	151	47	17	66	19	0.385	-1.377	0.0036616	0.0114629	down	5C	588709901	588710142	-	TRINITY_DN101250_c0_g1_i1	--	--	--	--	--	--	--	--
TRINITY_DN101253_c0_g1_i1.path1	18.24	16.35	16.25	3.2	7.35	2.6	136	151	124	22	62	20	0.281	-1.833	8.86993e-07	5.5411e-06	down	5C	59532552	59533370	-	TRINITY_DN101253_c0_g1_i1	--	--	--	--	--	--	--	--
TRINITY_DN10127_c0_g1_i2.path1	0	0	0.21	1.41	0.83	0.98	0	0	3	18	13	14	17.134	4.099	0.00026977	0.00110881	up	3C	355706950	355707946	-	TRINITY_DN10127_c0_g1_i2	--	K12309 beta-galactosidase [EC:3.2.1.23] | (Kazusa) Lj3g3v0323160.2; - (A)	PREDICTED: protein indeterminate-domain 7 [Brachypodium distachyon]	RecName: Full=Zinc finger protein MAGPIE {ECO:0000303|PubMed:17785527}; AltName: Full=Protein indeterminate-domain 3 {ECO:0000303|PubMed:16784536};	SubName: Full=Uncharacterized protein {ECO:0000313|EMBL:KQK08378.1};	FOG: Zn-finger	GO:0005634,nucleus; GO:0003700,DNA-binding transcription factor activity; GO:0046872,metal ion binding; GO:0044212,transcription regulatory region DNA binding; GO:0008356,asymmetric cell division; GO:0006355,regulation of transcription, DNA-templated; GO:0006351,transcription, DNA-templated	Zinc-finger double-stranded RNA-binding
TRINITY_DN10127_c0_g2_i1.path1	4.36	5.18	3.59	0.72	1	0.23	165	243	139	25	43	9	0.161	-2.638	4.91485e-12	5.68495e-11	down	2A	399501225	399503617	+	TRINITY_DN10127_c0_g2_i1	--	--	--	--	--	--	--	--
TRINITY_DN10127_c0_g2_i1.path2	2.09	2.3	1.5	0.46	0.4	0.26	79	108	58	16	17	10	0.206	-2.279	3.75112e-08	2.82692e-07	down	1A	18138819	18141211	-	TRINITY_DN10127_c0_g2_i1	--	--	--	--	--	--	--	--
TRINITY_DN10127_c0_g5_i2.path1	23.53	17.8	12.91	2.54	3.52	1.36	301	282	169	30	51	18	0.149	-2.748	2.22482e-15	3.51104e-14	down	6A	426046517	426047923	+	TRINITY_DN10127_c0_g5_i2	--	--	--	--	--	--	--	--
TRINITY_DN101270_c0_g1_i1.path1	3.05	3.61	2.58	13.66	15.98	12.6	15	22	13	62	89	64	5.012	2.325	3.24029e-09	2.78729e-08	up	5C	303876205	303880194	+	TRINITY_DN101270_c0_g1_i1	--	--	--	--	--	--	--	--
TRINITY_DN10128_c0_g2_i1.path1	0.5	0.11	0.09	0	0	0	11	3	2	0	0	0	0.039	-4.697	0.0106656	0.0291334	down	1A	240484408	240485801	-	TRINITY_DN10128_c0_g2_i1	--	--	--	--	--	--	--	--
TRINITY_DN101283_c0_g1_i1.path1	0.26	0.43	0.17	2.01	2.26	1.28	3	6	2	21	29	15	6.922	2.791	0.000123635	0.000542271	up	2A	37752658	37755025	+	TRINITY_DN101283_c0_g1_i1	--	--	--	--	--	--	--	--
TRINITY_DN101289_c0_g1_i1.path1	2.01	1.21	0.61	0.14	0.22	0.24	16	12	5	1	2	2	0.175	-2.512	0.017941	0.045469	down	5D	356549737	356550240	-	TRINITY_DN101289_c0_g1_i1	--	--	--	--	--	--	--	--
TRINITY_DN101295_c0_g1_i1.path1	8.84	5.92	7.9	0.82	2.9	0.49	35	29	32	3	13	2	0.203	-2.302	0.000540875	0.00208624	down	1A	30138551	30138997	+	TRINITY_DN101295_c0_g1_i1	--	--	--	--	--	--	--	--
TRINITY_DN101303_c0_g1_i1.path1	72.94	32.87	26.41	4.24	1.29	1.74	448	250	166	24	9	11	0.059	-4.078	9.40212e-19	1.92349e-17	down	7A	478237077	478237464	+	TRINITY_DN101303_c0_g1_i1	--	--	--	--	--	--	--	--
TRINITY_DN101304_c0_g1_i1.path1	0.93	0.66	0.8	0	0	0	8	7	7	0	0	0	0.029	-5.118	0.00169159	0.00581246	down	7C	669640277	669640817	+	TRINITY_DN101304_c0_g1_i1	--	K03327 multidrug resistance protein, MATE family | (RefSeq) LOC109733350; protein DETOXIFICATION 21-like (A)	Protein TRANSPARENT TESTA 12 [Triticum urartu]	RecName: Full=Protein DETOXIFICATION 21 {ECO:0000303|PubMed:11739388}; Short=AtDTX21 {ECO:0000303|PubMed:11739388}; AltName: Full=Multidrug and toxic compound extrusion protein 21 {ECO:0000305}; Short=MATE protein 21 {ECO:0000305};	SubName: Full=Uncharacterized protein {ECO:0000313|EnsemblPlants:TRIAE_CS42_5DL_TGACv1_434650_AA1439410.1};	Uncharacterized membrane protein, predicted efflux pump	GO:0016021,integral component of membrane; GO:0015297,antiporter activity; GO:0015238,drug transmembrane transporter activity; GO:0006855,drug transmembrane transport	MatE
TRINITY_DN101305_c0_g1_i1.path2	0.29	0.7	0	4.09	3.59	3.93	1	3	0	13	14	14	12.483	3.642	0.000493494	0.0019203	up	4D	346015901	346016118	+	TRINITY_DN101305_c0_g1_i1	--	--	--	--	--	--	--	--
TRINITY_DN10131_c0_g1_i1.path1	9.57	9.11	9.87	62.42	49.41	68.3	290	342	306	1744	1695	2137	6.999	2.807	4.96163e-33	2.37559e-31	up	4C	193404136	193412790	-	TRINITY_DN10131_c0_g1_i1	--	K08498 syntaxin 6 | (RefSeq) hypothetical protein (A)	PREDICTED: uncharacterized protein LOC100826256 [Brachypodium distachyon]	--	SubName: Full=Uncharacterized protein {ECO:0000313|EMBL:KQJ95773.1, ECO:0000313|EnsemblPlants:BRADI3G18930.1};	--	GO:0012505,endomembrane system; GO:0016021,integral component of membrane; GO:0031201,SNARE complex; GO:0005484,SNAP receptor activity; GO:0000149,SNARE binding; GO:0048193,Golgi vesicle transport; GO:0006886,intracellular protein transport; GO:0048278,vesicle docking; GO:0006906,vesicle fusion	Syntaxin 6, N-terminal
TRINITY_DN10131_c1_g1_i2.path1	1.43	1.1	1	4.66	2.05	2.58	21	20	15	63	34	39	2.877	1.525	0.00127089	0.00450039	up	4C	193411441	193412366	-	TRINITY_DN10131_c1_g1_i2	--	--	--	--	--	--	--	--
TRINITY_DN101312_c0_g1_i1.path1	1.84	1.09	1.44	0.27	0.11	0	15	11	12	2	1	0	0.089	-3.482	0.00276035	0.00895765	down	2C	1014186	1014701	-	TRINITY_DN101312_c0_g1_i1	--	--	--	--	--	--	--	--
TRINITY_DN10132_c0_g1_i4.path2	15.22	12.25	9.55	3.13	2.84	2.57	327	326	210	62	69	57	0.253	-1.982	6.02136e-13	7.63637e-12	down	7D	86881162	86882709	-	TRINITY_DN10132_c0_g1_i4	--	K09338 homeobox-leucine zipper protein | (RAP-DB) Os08g0481400, HOMEOBOX_GENE_20, HOX20; Similar to HAHB-7 (Fragment). (A)	PREDICTED: homeobox-leucine zipper protein HOX20 [Oryza sativa Japonica Group]	RecName: Full=Homeobox-leucine zipper protein HOX20; AltName: Full=HD-ZIP protein HOX20; AltName: Full=Homeodomain transcription factor HOX20; AltName: Full=OsHox20;	SubName: Full=Uncharacterized protein {ECO:0000313|EnsemblPlants:OBART08G18330.1};	Transcription factor HEX, contains HOX and HALZ domains	GO:0005634,nucleus; GO:0003700,DNA-binding transcription factor activity; GO:0043565,sequence-specific DNA binding; GO:0006351,transcription, DNA-templated	Homeobox domain
TRINITY_DN10132_c1_g1_i3.path1	0.18	0.66	0.18	12.99	12.52	18.6	2	9	2	131	155	210	46.388	5.536	2.45631e-25	7.79102e-24	up	1D	449498133	449499184	-	TRINITY_DN10132_c1_g1_i3	--	K09338 homeobox-leucine zipper protein | (RefSeq) homeobox-leucine zipper protein ATHB-16 (A)	predicted protein [Hordeum vulgare subsp. vulgare]	RecName: Full=Homeobox-leucine zipper protein HOX13; AltName: Full=HD-ZIP protein HOX13; AltName: Full=Homeodomain transcription factor HOX13; AltName: Full=OsHox13;	SubName: Full=Uncharacterized protein {ECO:0000313|EnsemblPlants:HORVU4Hr1G078410.4};	Transcription factor HEX, contains HOX and HALZ domains	GO:0005634,nucleus; GO:0003700,DNA-binding transcription factor activity; GO:0043565,sequence-specific DNA binding; GO:0006351,transcription, DNA-templated	Homeobox domain
TRINITY_DN10133_c0_g1_i1.path1	3.9	4.1	3.74	6.27	9.53	8.56	56	73	55	83	155	127	2.293	1.197	9.51892e-05	0.000427037	up	5C	606112877	606114767	+	TRINITY_DN10133_c0_g1_i1	--	K00465 carotenoid 9,10(9',10')-cleavage dioxygenase 1 [EC:1.13.11.-] | (RefSeq) carotenoid 9,10(9',10')-cleavage dioxygenase-like (A)	hypothetical protein BRADI_4g00330v3 [Brachypodium distachyon]	RecName: Full=Carotenoid 9,10(9',10')-cleavage dioxygenase; EC=1.14.99.n4; AltName: Full=CsCCD;	SubName: Full=Uncharacterized protein {ECO:0000313|EnsemblPlants:HORVU5Hr1G000320.15};	Beta, beta-carotene 15,15'-dioxygenase and related enzymes	GO:0005737,cytoplasm; GO:0046872,metal ion binding; GO:0016702,oxidoreductase activity, acting on single donors with incorporation of molecular oxygen, incorporation of two atoms of oxygen	Retinal pigment epithelial membrane protein
TRINITY_DN101339_c0_g1_i1.path1	3.24	2.4	1.32	9.08	4.06	8.63	12	11	5	31	17	33	3.496	1.806	0.00295563	0.00950951	up	1D	328918719	328918952	-	TRINITY_DN101339_c0_g1_i1	--	--	--	--	--	--	--	--
TRINITY_DN10134_c0_g2_i1.path2	0.78	2.5	1.89	5.05	5.99	11.83	4	16	10	24	35	63	4.981	2.317	8.14383e-05	0.000370021	up	7D	507319025	507319350	+	TRINITY_DN10134_c0_g2_i1	--	--	--	--	--	--	--	--
TRINITY_DN101348_c0_g1_i1.path1	2.11	2.77	2.32	0.29	0.23	0	8	13	9	1	1	0	0.077	-3.692	0.00668878	0.0194042	down	5A	480345415	480345653	-	TRINITY_DN101348_c0_g1_i1	--	--	--	--	--	--	--	--
TRINITY_DN10135_c0_g1_i2.path1	3.18	3.19	1.42	7.24	4.69	5.45	70	87	32	147	117	124	2.474	1.307	0.000173859	0.000742485	up	4D	345550889	345554332	-	TRINITY_DN10135_c0_g1_i2	--	--	unnamed protein product [Triticum aestivum]	RecName: Full=Protein XRI1; AltName: Full=Protein X-RAY INDUCED 1;	SubName: Full=Uncharacterized protein {ECO:0000313|EMBL:CDM85720.1, ECO:0000313|EnsemblPlants:TRIAE_CS42_U_TGACv1_642374_AA2116510.1};	--	GO:0005634,nucleus; GO:0006281,DNA repair; GO:0007143,female meiotic nuclear division; GO:0007140,male meiotic nuclear division; GO:0009555,pollen development; GO:0010165,response to X-ray	--
TRINITY_DN101362_c0_g1_i1.path1	18.37	7.99	10.85	2.63	3.92	4.5	91	49	55	12	22	23	0.329	-1.604	0.000629023	0.00239113	down	7D	395102958	395103348	+	TRINITY_DN101362_c0_g1_i1	--	--	--	--	--	--	--	--
TRINITY_DN101368_c0_g1_i1.path1	0	0	0	1.62	3.14	0.82	0	0	0	16	38	9	125.188	6.968	5.03904e-07	3.26193e-06	up	4A	339572667	339574337	-	TRINITY_DN101368_c0_g1_i1	--	--	--	--	--	--	--	--
TRINITY_DN101368_c0_g1_i1.path2	0	0	0	0.6	1.07	0.36	0	0	0	6	13	4	46.167	5.529	0.000586494	0.00224495	up	3D	284510046	284512407	+	TRINITY_DN101368_c0_g1_i1	--	--	--	--	--	--	--	--
TRINITY_DN10137_c1_g1_i1.path1	16.59	15.36	15.57	0.71	2.01	0.47	204	234	196	8	28	6	0.074	-3.763	4.98623e-21	1.20078e-19	down	6C	180126423	180128320	+	TRINITY_DN10137_c1_g1_i1	--	K08065 nuclear transcription Y subunit beta | (RefSeq) nuclear transcription factor Y subunit B-1-like (A)	Nuclear transcription factor Y subunit B-8 [Glycine soja]	--	SubName: Full=Nuclear transcription factor Y subunit B-8 {ECO:0000313|EMBL:KHN31648.1};	--	GO:0046982,protein heterodimerization activity	--
TRINITY_DN101371_c0_g1_i1.path1	0	0	0	0.83	0.29	1.38	0	0	0	7	3	13	50.901	5.67	0.000448809	0.00176277	up	4C	20780071	20781624	+	TRINITY_DN101371_c0_g1_i1	--	--	--	--	--	--	--	--
TRINITY_DN101392_c0_g1_i1.path1	2.92	2.36	4.67	0	0.7	0	11	11	18	0	3	0	0.08	-3.641	0.0025531	0.00836203	down	2A	379598431	379598668	-	TRINITY_DN101392_c0_g1_i1	--	--	--	--	--	--	--	--
TRINITY_DN101405_c0_g1_i1.path3	16.42	13.83	16.05	41.24	18.61	60.17	92	96	92	213	118	348	2.931	1.551	8.8575e-05	0.000399506	up	1C	457867241	457909097	-	TRINITY_DN101405_c0_g1_i1	--	K05665 ATP-binding cassette, subfamily C (CFTR/MRP), member 1 [EC:7.6.2.3] | (RefSeq) LOC109774444; ABC transporter C family member 3-like (A)	predicted protein, partial [Hordeum vulgare subsp. vulgare]	RecName: Full=ABC transporter C family member 3; Short=ABC transporter ABCC.3; Short=AtABCC3; EC=3.6.3.44; AltName: Full=ATP-energized glutathione S-conjugate pump 3; AltName: Full=Glutathione S-conjugate-transporting ATPase 3; AltName: Full=Multidrug resistance-associated protein 3;	SubName: Full=ATMRP3 {ECO:0000313|EMBL:JAD95530.1};	Multidrug resistance-associated protein/mitoxantrone resistance protein, ABC superfamily	GO:0048046,apoplast; GO:0016021,integral component of membrane; GO:0000325,plant-type vacuole; GO:0009506,plasmodesma; GO:0005774,vacuolar membrane; GO:0005773,vacuole; GO:0005524,ATP binding; GO:0042626,ATPase activity, coupled to transmembrane movement of substances; GO:0010290,chlorophyll catabolite transmembrane transporter activity; GO:0015431,glutathione S-conjugate-exporting ATPase activit…	ABC transporter
TRINITY_DN101407_c0_g1_i1.path1	29.71	20.52	18.71	4.47	8.07	5.55	166	142	107	23	51	32	0.289	-1.793	2.99648e-07	2.00177e-06	down	3C	326313490	326313842	-	TRINITY_DN101407_c0_g1_i1	--	--	--	--	--	--	--	--
TRINITY_DN101419_c0_g1_i1.path1	0	0	0	1.7	0.79	0.43	0	0	0	7	4	2	27.439	4.778	0.0094363	0.0262143	up	7A	471968855	471969137	-	TRINITY_DN101419_c0_g1_i1	--	--	--	--	--	--	--	--
TRINITY_DN101422_c0_g1_i1.path1	6.58	8.66	6.43	0.19	1.07	0.34	38	62	38	1	7	2	0.083	-3.589	7.18465e-08	5.20758e-07	down	2C	2244686	2245050	-	TRINITY_DN101422_c0_g1_i1	--	--	--	--	--	--	--	--
TRINITY_DN101436_c0_g1_i1.path1	7.41	6.42	4.94	1.05	1.42	0.73	69	74	47	9	15	7	0.187	-2.418	2.22493e-07	1.51205e-06	down	4C	75934650	75935630	-	TRINITY_DN101436_c0_g1_i1	--	--	--	--	--	--	--	--
TRINITY_DN101437_c0_g1_i1.path1	7.68	10.54	9.77	73.57	45.05	92.63	63	107	82	556	418	784	8.474	3.083	4.34765e-22	1.11937e-20	up	5D	500437209	500437726	-	TRINITY_DN101437_c0_g1_i1	--	--	--	--	--	--	--	--
TRINITY_DN101438_c0_g1_i1.path1	2.41	1.41	1.37	0.58	0.77	0.52	36	26	21	8	13	8	0.395	-1.339	0.0196815	0.0491225	down	3C	226513123	226517422	+	TRINITY_DN101438_c0_g1_i1	--	--	--	--	--	--	--	--
TRINITY_DN101439_c0_g1_i1.path2	0.77	0.54	0.94	0	0.17	0	8	7	10	0	2	0	0.086	-3.54	0.0148627	0.0387124	down	2A	177883440	177884099	-	TRINITY_DN101439_c0_g1_i1	--	--	--	--	--	--	--	--
TRINITY_DN101452_c0_g1_i1.path1	0.83	3.5	3.63	5.6	7.66	6.4	4	21	18	25	42	32	2.703	1.435	0.00997611	0.0275014	up	2A	428431487	428431792	-	TRINITY_DN101452_c0_g1_i1	--	K03549 KUP system potassium uptake protein | (RefSeq) potassium transporter 6-like isoform X1 (A)	hypothetical protein AQUCO_02500277v1 [Aquilegia coerulea]	--	RecName: Full=Potassium transporter {ECO:0000256|RuleBase:RU321113};	--	GO:0016021,integral component of membrane; GO:0015079,potassium ion transmembrane transporter activity	--
TRINITY_DN101453_c0_g1_i1.path1	23.51	24.76	10.41	2.79	6.65	3.74	128	167	58	14	41	21	0.249	-2.003	2.40021e-06	1.40437e-05	down	4C	352077648	352077991	+	TRINITY_DN101453_c0_g1_i1	--	--	--	--	--	--	--	--
TRINITY_DN101457_c0_g1_i1.path1	0.46	1.96	1.48	0.33	0	0	3	16	10	2	0	0	0.085	-3.549	0.0142467	0.0373242	down	1A	14976609	14977024	+	TRINITY_DN101457_c0_g1_i1	--	--	--	--	--	--	--	--
TRINITY_DN101461_c0_g1_i1.path1	0	0	0	3.56	0.67	1.47	0	0	0	13	3	6	48.182	5.59	0.000617253	0.0023506	up	5A	416755158	416755407	-	TRINITY_DN101461_c0_g1_i1	--	--	--	--	--	--	--	--
TRINITY_DN101461_c0_g1_i1.path2	0	0	0	1.37	2.01	2.2	0	0	0	5	9	9	48.136	5.589	0.000400199	0.00158777	up	5D	375980699	375980948	-	TRINITY_DN101461_c0_g1_i1	--	--	--	--	--	--	--	--
TRINITY_DN101475_c0_g1_i1.path1	12.08	11.13	9.74	4.37	2.06	2.26	57	65	47	19	11	11	0.286	-1.807	8.2137e-05	0.000372886	down	3C	449074426	449075151	+	TRINITY_DN101475_c0_g1_i1	--	K01681 aconitate hydratase [EC:4.2.1.3] | (RefSeq) LOC109738732; putative aconitate hydratase, cytoplasmic isoform X1 (A)	putative aconitate hydratase, cytoplasmic isoform X3 [Aegilops tauschii subsp. tauschii]	RecName: Full=Aconitate hydratase, cytoplasmic; Short=Aconitase; EC=4.2.1.3; AltName: Full=Citrate hydro-lyase; Flags: Fragment;	SubName: Full=Uncharacterized protein {ECO:0000313|EnsemblPlants:TRIAE_CS42_3B_TGACv1_226947_AA0820310.1};	RNA-binding translational regulator IRP (aconitase superfamily)	GO:0005737,cytoplasm; GO:0051539,4 iron, 4 sulfur cluster binding; GO:0003994,aconitate hydratase activity; GO:0046872,metal ion binding; GO:0006097,glyoxylate cycle	--
TRINITY_DN101478_c0_g1_i1.path1	0.82	1.23	0	3.31	4.56	4.88	7	13	0	26	44	43	6.905	2.788	1.95765e-05	9.93059e-05	up	7A	6726258	6726796	-	TRINITY_DN101478_c0_g1_i1	--	--	--	--	--	--	--	Reverse transcriptase-like
TRINITY_DN10148_c0_g1_i1.path1	1.61	0.49	0.39	2.85	2.14	5.87	8	3	2	13	12	30	4.995	2.321	0.00390703	0.0121283	up	6A	300740150	300740462	-	TRINITY_DN10148_c0_g1_i1	--	--	--	--	--	--	--	--
TRINITY_DN10148_c0_g1_i1.path2	0.2	0.65	2.76	17.08	12.66	21.31	1	4	14	78	71	109	15.722	3.975	8.22172e-12	9.31332e-11	up	6D	262969316	262969628	-	TRINITY_DN10148_c0_g1_i1	--	--	--	--	--	--	--	--
TRINITY_DN10148_c0_g2_i5.path1	7.68	8.64	8.21	1.19	1.33	1.25	244	340	267	35	48	41	0.17	-2.561	1.31737e-21	3.28461e-20	down	Chr00	24700892	24703905	-	TRINITY_DN10148_c0_g2_i5	--	K14510 serine/threonine-protein kinase CTR1 [EC:2.7.11.1] | (RefSeq) serine/threonine-protein kinase EDR1-like isoform X1 (A)	RGS domain-containing serine/threonine-protein kinase A-like isoform X2 [Aegilops tauschii subsp. tauschii]	--	SubName: Full=Uncharacterized protein {ECO:0000313|EnsemblPlants:HORVU4Hr1G029350.4};	Tyrosine kinase specific for activated (GTP-bound) p21cdc42Hs	GO:0006355,regulation of transcription, DNA-templated	PAS fold
TRINITY_DN101482_c0_g1_i1.path1	3.7	0.65	2.04	0.17	0.57	0.16	23	5	13	1	4	1	0.154	-2.699	0.0090215	0.0252018	down	1A	440031844	440032345	-	TRINITY_DN101482_c0_g1_i1	--	--	--	--	--	--	--	--
TRINITY_DN101494_c0_g1_i1.path1	3.35	5.42	5.87	0.45	0.99	0.41	24	48	43	3	8	3	0.139	-2.846	7.61774e-06	4.12827e-05	down	7C	273284917	273285368	+	TRINITY_DN101494_c0_g1_i1	--	--	--	--	--	--	--	--
TRINITY_DN101498_c0_g1_i1.path1	18.19	26.53	19.88	50.51	43.73	48.51	93	168	104	238	253	256	2.444	1.289	3.90582e-07	2.56816e-06	up	7C	620450520	620450842	+	TRINITY_DN101498_c0_g1_i1	--	--	--	--	--	--	--	--
TRINITY_DN101503_c0_g1_i1.path1	1.44	1.85	1.68	0	0	0	5	8	6	0	0	0	0.034	-4.871	0.00410775	0.0126805	down	1A	327699858	327710055	-	TRINITY_DN101503_c0_g1_i1	--	K13415 protein brassinosteroid insensitive 1 [EC:2.7.10.1 2.7.11.1] | (RefSeq) protein BRASSINOSTEROID INSENSITIVE 1-like (A)	Serine carboxypeptidase-like 18 [Triticum urartu]	--	SubName: Full=Uncharacterized protein {ECO:0000313|EnsemblPlants:TRIAE_CS42_6AS_TGACv1_487629_AA1571910.1};	--	--	--
TRINITY_DN101508_c0_g1_i1.path1	0	0	0	8.35	0.72	3.14	0	0	0	38	4	16	129.024	7.011	1.61643e-06	9.72042e-06	up	1A	464254964	464255275	-	TRINITY_DN101508_c0_g1_i1	--	--	--	--	--	--	--	--
TRINITY_DN10151_c2_g1_i1.path1	1.11	1.8	0.87	0.24	0	0	5	10	4	1	0	0	0.068	-3.869	0.0196819	0.0491225	down	5A	272378862	272379145	+	TRINITY_DN10151_c2_g1_i1	--	--	--	--	--	--	--	--
TRINITY_DN101517_c0_g1_i1.path1	0	0	0	2.15	10.33	3.45	0	0	0	10	59	18	170.264	7.412	6.74465e-08	4.90175e-07	up	7C	543538507	543538825	+	TRINITY_DN101517_c0_g1_i1	--	--	--	--	--	--	--	--
TRINITY_DN10152_c0_g1_i7.path1	0.61	1.13	0.91	10.88	8.5	12.11	21	48	32	345	331	430	13.205	3.723	1.35565e-32	6.36636e-31	up	6C	528482009	528486589	-	TRINITY_DN10152_c0_g1_i7	--	K20044 phosphatidylinositol-binding clathrin assembly protein | (RefSeq) LOC109784921; putative clathrin assembly protein At5g35200 isoform X1 (A)	putative clathrin assembly protein At5g35200 isoform X1 [Aegilops tauschii subsp. tauschii]	RecName: Full=Putative clathrin assembly protein At5g35200;	SubName: Full=Uncharacterized protein {ECO:0000313|EnsemblPlants:TRIAE_CS42_6AL_TGACv1_471527_AA1510360.6};	Clathrin assembly protein AP180 and related proteins, contain ENTH domain	GO:0005905,clathrin-coated pit; GO:0030136,clathrin-coated vesicle; GO:0005794,Golgi apparatus; GO:0005886,plasma membrane; GO:0005545,1-phosphatidylinositol binding; GO:0030276,clathrin binding; GO:0048268,clathrin coat assembly; GO:0006897,endocytosis	ANTH domain
TRINITY_DN101528_c0_g1_i1.path1	36.99	30.33	28.37	4.01	10.31	3.86	130	132	102	13	41	14	0.208	-2.267	1.24388e-08	9.92855e-08	down	1A	411017940	411018161	+	TRINITY_DN101528_c0_g1_i1	--	--	--	--	--	--	--	--
TRINITY_DN10153_c0_g1_i5.path1	3.3	4.67	7.15	0.57	0.55	0.37	69	121	153	11	13	8	0.106	-3.231	1.40982e-12	1.7189e-11	down	2C	457517146	457519376	-	TRINITY_DN10153_c0_g1_i5	--	K14492 two-component response regulator ARR-A family | (RefSeq) LOC109736741; two-component response regulator ORR1-like (A)	type-A response regulator ARR1 [Lolium perenne]	RecName: Full=Two-component response regulator ORR1 {ECO:0000305}; AltName: Full=Type A response regulator 1 {ECO:0000303|PubMed:16472405}; Short=OsRR1 {ECO:0000303|PubMed:16472405};	SubName: Full=Type-A response regulator ARR1 {ECO:0000313|EMBL:ALT32064.1};	GATA-4/5/6 transcription factors	GO:0005622,intracellular; GO:0009736,cytokinin-activated signaling pathway; GO:0000160,phosphorelay signal transduction system; GO:0006355,regulation of transcription, DNA-templated; GO:0009735,response to cytokinin; GO:0006351,transcription, DNA-templated	--
TRINITY_DN101533_c0_g1_i1.path1	4.35	3.89	3.53	0	0	0	65	72	54	0	0	0	0.003	-8.215	5.20606e-11	5.43697e-10	down	3C	407207989	407208933	+	TRINITY_DN101533_c0_g1_i1	--	--	--	--	--	--	--	--
TRINITY_DN101535_c0_g1_i1.path1	12.73	17.05	18.43	32.87	31.47	32.16	79	131	117	188	221	206	2.201	1.138	1.68295e-05	8.63686e-05	up	4C	358280333	358280724	+	TRINITY_DN101535_c0_g1_i1	--	K03178 ubiquitin-activating enzyme E1 [EC:6.2.1.45] | (RefSeq) ubiquitin-activating enzyme E1 2-like (A)	PREDICTED: ubiquitin-activating enzyme E1 2-like [Oryza brachyantha]	RecName: Full=Ubiquitin-activating enzyme E1 1; EC=6.2.1.45 {ECO:0000269|PubMed:1634524};	SubName: Full=Uncharacterized protein {ECO:0000313|EMBL:ACL52913.1};	Ubiquitin activating enzyme UBA1	GO:0005524,ATP binding; GO:0004839,ubiquitin activating enzyme activity	--
TRINITY_DN10154_c0_g1_i4.path2	2.54	2.27	2.11	0.54	0.14	0.34	66	73	56	13	4	9	0.159	-2.656	1.48306e-07	1.03183e-06	down	5C	111178645	111180286	+	TRINITY_DN10154_c0_g1_i4	--	--	--	--	--	--	--	--
TRINITY_DN10154_c0_g2_i1.path1	2.24	2.59	2.57	4.19	4.54	5.32	51	73	60	88	117	125	2.103	1.072	0.000506077	0.00196426	up	3C	169413669	169415728	+	TRINITY_DN10154_c0_g2_i1	--	--	--	--	--	--	--	--
TRINITY_DN101544_c0_g1_i1.path1	15.63	21.79	20.73	2.77	4.52	4.13	165	285	224	27	54	45	0.217	-2.201	9.16941e-13	1.14021e-11	down	5D	487693892	487694558	+	TRINITY_DN101544_c0_g1_i1	--	K00899 5-methylthioribose kinase [EC:2.7.1.100] | (RefSeq) methylthioribose kinase 2 (A)	PREDICTED: methylthioribose kinase 2 [Brachypodium distachyon]	RecName: Full=Methylthioribose kinase 1; Short=MTR kinase 1; Short=OsMTK1; EC=2.7.1.100;	SubName: Full=Uncharacterized protein {ECO:0000313|EnsemblPlants:HORVU2Hr1G122370.4};	--	GO:0005524,ATP binding; GO:0046522,S-methyl-5-thioribose kinase activity; GO:0019509,L-methionine salvage from methylthioadenosine	--
TRINITY_DN101549_c0_g1_i1.path1	2.23	2.07	2.18	0.24	0.2	0	20	23	20	2	2	0	0.072	-3.787	9.3808e-05	0.000421331	down	2C	173564187	173565293	-	TRINITY_DN101549_c0_g1_i1	--	--	--	--	--	--	--	--
TRINITY_DN101551_c0_g1_i1.path1	30.45	30.79	53.4	0.31	1.51	0.83	107	134	192	1	6	3	0.026	-5.275	4.87031e-19	1.01761e-17	down	2C	568370796	568371017	+	TRINITY_DN101551_c0_g1_i1	--	--	--	--	--	--	--	--
TRINITY_DN101556_c0_g1_i1.path1	0.24	0	0	1.29	1.47	1.38	1	0	0	5	7	6	19.313	4.271	0.00808846	0.0229243	up	7D	87674396	87674661	+	TRINITY_DN101556_c0_g1_i1	--	--	--	--	--	--	--	--
TRINITY_DN101557_c0_g1_i1.path1	0	0	0	1.92	0.59	0.43	0	0	0	8	3	2	27.849	4.8	0.00953859	0.0264519	up	7C	307036246	307040824	+	TRINITY_DN101557_c0_g1_i1	--	--	--	--	--	--	--	--
TRINITY_DN10156_c0_g1_i2.path1	2.88	3.77	2.81	9.23	5.55	10.06	152	247	152	450	332	549	2.944	1.558	9.19306e-08	6.56974e-07	up	2A	312918484	312922870	+	TRINITY_DN10156_c0_g1_i2	--	--	uncharacterized protein At4g26450-like [Aegilops tauschii subsp. tauschii]	--	SubName: Full=Uncharacterized protein {ECO:0000313|EnsemblPlants:TRIAE_CS42_2DL_TGACv1_161697_AA0560110.2};	--	--	--
TRINITY_DN10156_c0_g1_i2.path2	1.97	2.49	3.35	7.82	4.43	9.46	104	163	181	381	265	516	3.103	1.633	1.64502e-06	9.87767e-06	up	2D	10758164	10762550	-	TRINITY_DN10156_c0_g1_i2	--	--	uncharacterized protein At4g26450-like [Aegilops tauschii subsp. tauschii]	--	SubName: Full=Uncharacterized protein {ECO:0000313|EnsemblPlants:TRIAE_CS42_2DL_TGACv1_161697_AA0560110.2};	--	--	--
TRINITY_DN10156_c0_g1_i2.path3	2.26	2.12	1.37	8.63	5.77	11.46	119	138	74	419	344	623	5.079	2.344	3.21599e-13	4.17931e-12	up	2C	449586817	449591073	+	TRINITY_DN10156_c0_g1_i2	--	--	PREDICTED: uncharacterized protein At4g26450 [Brachypodium distachyon]	--	SubName: Full=Uncharacterized protein {ECO:0000313|EMBL:KQJ82649.1, ECO:0000313|EnsemblPlants:BRADI5G10240.1};	--	--	--
TRINITY_DN101562_c0_g1_i1.path1	0.15	0.06	0	0.66	0.74	0.44	2	1	0	8	11	6	9.544	3.255	0.00889022	0.0248716	up	4C	185158777	185159603	+	TRINITY_DN101562_c0_g1_i1	--	--	--	--	--	--	--	--
TRINITY_DN101568_c0_g1_i1.path1	0.29	0.47	0.28	5.69	3.6	4.51	1	2	1	18	14	16	14.358	3.844	0.000103111	0.00045926	up	2C	70582241	70582457	-	TRINITY_DN101568_c0_g1_i1	--	--	--	--	--	--	--	--
TRINITY_DN101579_c0_g1_i1.path3	3.33	2.11	3.4	0	0	0	23	18	24	0	0	0	0.01	-6.697	8.90757e-07	5.56312e-06	down	3D	326608815	326609250	-	TRINITY_DN101579_c0_g1_i1	--	--	--	--	--	--	--	--
TRINITY_DN101580_c0_g1_i1.path1	0	0	0.23	2.6	1.06	2.55	0	0	1	10	5	11	29.037	4.86	0.00137468	0.00483085	up	6A	177065440	177065703	+	TRINITY_DN101580_c0_g1_i1	--	--	--	--	--	--	--	--
TRINITY_DN101584_c0_g1_i1.path1	0	0.1	0	1.3	1.16	1.16	0	1	0	10	11	10	33.467	5.065	0.000521555	0.00201895	up	5D	415066222	415066749	-	TRINITY_DN101584_c0_g1_i1	--	--	--	--	--	--	--	--
TRINITY_DN101594_c0_g1_i1.path1	14.01	15.79	13.69	0.32	1.29	0.57	96	134	96	2	10	4	0.056	-4.152	1.22015e-16	2.13744e-15	down	3C	380619628	380620060	-	TRINITY_DN101594_c0_g1_i1	--	--	--	--	--	--	--	--
TRINITY_DN101597_c0_g1_i1.path1	0.34	0.56	0	0.94	2.13	1.5	4	8	0	10	28	18	5.576	2.479	0.00273168	0.00887542	up	6C	395146901	395147633	-	TRINITY_DN101597_c0_g1_i1	--	--	--	--	--	--	--	--
TRINITY_DN101601_c0_g1_i1.path2	7.48	5.15	6.5	3.01	1.71	1.61	27	23	24	10	7	6	0.358	-1.483	0.0150094	0.0390422	down	3A	378206578	378206805	+	TRINITY_DN101601_c0_g1_i1	--	--	--	--	--	--	--	ChaC-like protein
TRINITY_DN10161_c0_g1_i4.path1	8.4	10.54	7.76	2.38	2.63	1.38	130	202	123	34	46	22	0.261	-1.939	1.43976e-09	1.28884e-08	down	2D	398584142	398586573	+	TRINITY_DN10161_c0_g1_i4	--	K20131 Rab5 GDP/GTP exchange factor | (RefSeq) hypothetical protein (A)	predicted protein [Hordeum vulgare subsp. vulgare]	RecName: Full=Protein THYLAKOID ASSEMBLY 8, chloroplastic {ECO:0000303|PubMed:22495966}; Short=At-THA8 {ECO:0000303|PubMed:22495966}; Short=AtTHA8 {ECO:0000303|PubMed:24047899}; AltName: Full=Protein EMBRYO DEFECTIVE 3123 {ECO:0000303|PubMed:15266054}; Flags: Precursor;	SubName: Full=Predicted protein {ECO:0000313|EMBL:BAJ89942.1};	--	GO:0009507,chloroplast; GO:0009535,chloroplast thylakoid membrane; GO:0003723,RNA binding; GO:1990825,sequence-specific mRNA binding; GO:0003727,single-stranded RNA binding; GO:0009658,chloroplast organization; GO:0009793,embryo development ending in seed dormancy; GO:0000373,Group II intron splicing; GO:0006397,mRNA processing	PPR repeat family
TRINITY_DN10161_c0_g1_i4.path2	11.96	12.06	9.56	4.88	4.73	1.86	181	226	148	68	81	29	0.368	-1.442	1.03603e-05	5.499e-05	down	2A	337747907	337750340	-	TRINITY_DN10161_c0_g1_i4	--	K20131 Rab5 GDP/GTP exchange factor | (RefSeq) hypothetical protein (A)	predicted protein [Hordeum vulgare subsp. vulgare]	RecName: Full=Protein THYLAKOID ASSEMBLY 8, chloroplastic {ECO:0000303|PubMed:22495966}; Short=At-THA8 {ECO:0000303|PubMed:22495966}; Short=AtTHA8 {ECO:0000303|PubMed:24047899}; AltName: Full=Protein EMBRYO DEFECTIVE 3123 {ECO:0000303|PubMed:15266054}; Flags: Precursor;	SubName: Full=Predicted protein {ECO:0000313|EMBL:BAJ89942.1};	--	GO:0009507,chloroplast; GO:0009535,chloroplast thylakoid membrane; GO:0003723,RNA binding; GO:1990825,sequence-specific mRNA binding; GO:0003727,single-stranded RNA binding; GO:0009658,chloroplast organization; GO:0009793,embryo development ending in seed dormancy; GO:0000373,Group II intron splicing; GO:0006397,mRNA processing	PPR repeat family
TRINITY_DN101619_c0_g1_i1.path1	2.36	0.52	1.26	0	0.19	0	11	3	6	0	1	0	0.059	-4.074	0.0137486	0.0361996	down	5C	260174638	260175026	-	TRINITY_DN101619_c0_g1_i1	--	--	--	--	--	--	--	--
TRINITY_DN101622_c0_g1_i1.path1	24.78	18.35	15.56	4.32	3.52	3.48	193	177	124	31	31	28	0.211	-2.242	1.08705e-11	1.21629e-10	down	3A	208190487	208190978	-	TRINITY_DN101622_c0_g1_i1	--	--	--	--	--	--	--	--
TRINITY_DN101636_c0_g1_i1.path1	0	0	0.3	3.7	4.1	1.8	0	0	1	11	15	6	33.648	5.072	0.000553859	0.00213142	up	4D	2215316	2215519	-	TRINITY_DN101636_c0_g1_i1	--	--	--	--	--	--	--	--
TRINITY_DN101637_c0_g1_i1.path1	11.57	32.78	24.84	5.97	11.57	12.13	61	214	134	29	69	66	0.48	-1.059	0.0103004	0.0282732	down	4D	299457459	299458016	-	TRINITY_DN101637_c0_g1_i1	--	--	PREDICTED: putative transcription factor bHLH041 [Brachypodium distachyon]	--	SubName: Full=Uncharacterized protein {ECO:0000313|EMBL:KQK08395.1, ECO:0000313|EnsemblPlants:BRADI2G41670.1};	--	GO:0046983,protein dimerization activity	--
TRINITY_DN101637_c0_g1_i1.path2	17.07	53.76	39.86	2.06	10.39	2.94	90	351	215	10	62	16	0.152	-2.721	4.46204e-08	3.32528e-07	down	4A	302708375	302708938	-	TRINITY_DN101637_c0_g1_i1	--	--	PREDICTED: putative transcription factor bHLH041 [Brachypodium distachyon]	--	SubName: Full=Uncharacterized protein {ECO:0000313|EMBL:KQK08395.1, ECO:0000313|EnsemblPlants:BRADI2G41670.1};	--	GO:0046983,protein dimerization activity	--
TRINITY_DN101638_c0_g1_i1.path1	0.13	0	0.25	1.11	1.13	2.22	1	0	2	8	10	18	13.8	3.787	0.0011336	0.00406228	up	4A	286419247	286419742	-	TRINITY_DN101638_c0_g1_i1	--	--	--	--	--	--	--	--
TRINITY_DN10164_c0_g1_i10.path2	4.9	4.91	4.79	2.13	2.33	1.65	132	164	132	53	71	46	0.457	-1.128	6.50949e-05	0.00030138	down	6A	268844178	268846101	-	TRINITY_DN10164_c0_g1_i10	--	--	--	--	--	--	--	--
TRINITY_DN101645_c0_g1_i1.path2	4.9	13.95	15.88	2.24	2.73	3.25	19	67	63	8	12	13	0.262	-1.935	0.000522603	0.00202241	down	6D	136071288	136071773	+	TRINITY_DN101645_c0_g1_i1	--	--	--	--	--	--	--	--
TRINITY_DN10165_c0_g1_i2.path1	0.4	1.75	2.29	7.25	16.79	47.78	16	86	93	265	754	1957	18.656	4.222	3.18552e-05	0.000155895	up	7D	453990420	453996265	-	TRINITY_DN10165_c0_g1_i2	--	K04733 interleukin-1 receptor-associated kinase 4 [EC:2.7.11.1] | (RefSeq) receptor-like cytosolic serine/threonine-protein kinase RBK1 isoform X1 (A)	predicted protein [Hordeum vulgare subsp. vulgare]	RecName: Full=Receptor-like cytosolic serine/threonine-protein kinase RBK1; EC=2.7.11.1; AltName: Full=Protein ROP BINDING PROTEIN KINASES 1;	SubName: Full=Uncharacterized protein {ECO:0000313|EnsemblPlants:HORVU7Hr1G109290.1};	Serine/threonine protein kinase	GO:0005737,cytoplasm; GO:0005829,cytosol; GO:0012505,endomembrane system; GO:0005634,nucleus; GO:0005886,plasma membrane; GO:0005524,ATP binding; GO:0051020,GTPase binding; GO:0016301,kinase activity; GO:0004675,transmembrane receptor protein serine/threonine kinase activity; GO:0007166,cell surface receptor signaling pathway; GO:0071369,cellular response to ethylene stimulus; GO:0009814,defense …	Protein kinase domain
TRINITY_DN101653_c0_g1_i1.path1	5.93	6.45	6.05	1.4	0.91	1.75	23	31	24	5	4	7	0.243	-2.042	0.00152734	0.00530405	down	3A	353479230	353479474	+	TRINITY_DN101653_c0_g1_i1	--	--	--	--	--	--	--	--
TRINITY_DN101666_c0_g1_i1.path1	11.85	12.75	14.84	0.66	3.76	2.35	39	52	50	2	14	8	0.191	-2.385	2.19967e-05	0.000110667	down	3C	124604933	124605140	-	TRINITY_DN101666_c0_g1_i1	--	--	--	--	--	--	--	--
TRINITY_DN10168_c0_g1_i3.path1	3.73	3.14	2.97	11.29	12.66	11.75	146	152	119	407	560	474	3.993	1.997	8.56585e-19	1.7551e-17	up	6A	240484686	240491243	-	TRINITY_DN10168_c0_g1_i3	--	K00876 uridine kinase [EC:2.7.1.48] | (RefSeq) LOC109766944; uridine-cytidine kinase C-like (A)	predicted protein [Hordeum vulgare subsp. vulgare]	RecName: Full=Uridine kinase-like protein 1, chloroplastic; Includes: RecName: Full=Uridine kinase; Short=UK; EC=2.7.1.48; Includes: RecName: Full=Putative uracil phosphoribosyltransferase; Short=UPRTase; EC=2.4.2.9; AltName: Full=UMP pyrophosphorylase; Flags: Precursor;	SubName: Full=Predicted protein {ECO:0000313|EMBL:BAJ98691.1, ECO:0000313|EnsemblPlants:HORVU6Hr1G069280.2};	Armadillo/beta-Catenin/plakoglobin	GO:0009507,chloroplast; GO:0005737,cytoplasm; GO:0005829,cytosol; GO:0005524,ATP binding; GO:0005525,GTP binding; GO:0004845,uracil phosphoribosyltransferase activity; GO:0004849,uridine kinase activity; GO:0044211,CTP salvage; GO:0006206,pyrimidine nucleobase metabolic process; GO:2000904,regulation of starch metabolic process; GO:0044206,UMP salvage	Phosphoribulokinase / Uridine kinase family
TRINITY_DN10168_c0_g1_i3.path2	2.82	2.98	2.75	8.64	7.83	7.12	110	144	110	311	346	287	3.028	1.598	1.45265e-12	1.7688e-11	up	6D	207658298	207664370	-	TRINITY_DN10168_c0_g1_i3	--	K00876 uridine kinase [EC:2.7.1.48] | (RefSeq) LOC109766944; uridine-cytidine kinase C-like (A)	predicted protein [Hordeum vulgare subsp. vulgare]	RecName: Full=Uridine kinase-like protein 1, chloroplastic; Includes: RecName: Full=Uridine kinase; Short=UK; EC=2.7.1.48; Includes: RecName: Full=Putative uracil phosphoribosyltransferase; Short=UPRTase; EC=2.4.2.9; AltName: Full=UMP pyrophosphorylase; Flags: Precursor;	SubName: Full=Predicted protein {ECO:0000313|EMBL:BAJ98691.1, ECO:0000313|EnsemblPlants:HORVU6Hr1G069280.2};	Armadillo/beta-Catenin/plakoglobin	GO:0009507,chloroplast; GO:0005737,cytoplasm; GO:0005829,cytosol; GO:0005524,ATP binding; GO:0005525,GTP binding; GO:0004845,uracil phosphoribosyltransferase activity; GO:0004849,uridine kinase activity; GO:0044211,CTP salvage; GO:0006206,pyrimidine nucleobase metabolic process; GO:2000904,regulation of starch metabolic process; GO:0044206,UMP salvage	Phosphoribulokinase / Uridine kinase family
TRINITY_DN10168_c0_g1_i3.path3	1.58	1.69	1.62	5.3	4.34	3.96	62	82	65	191	192	160	3.037	1.603	1.5858e-09	1.41197e-08	up	6C	102403248	102409077	+	TRINITY_DN10168_c0_g1_i3	--	K00876 uridine kinase [EC:2.7.1.48] | (RefSeq) LOC109766944; uridine-cytidine kinase C-like (A)	predicted protein [Hordeum vulgare subsp. vulgare]	RecName: Full=Uridine kinase-like protein 1, chloroplastic; Includes: RecName: Full=Uridine kinase; Short=UK; EC=2.7.1.48; Includes: RecName: Full=Putative uracil phosphoribosyltransferase; Short=UPRTase; EC=2.4.2.9; AltName: Full=UMP pyrophosphorylase; Flags: Precursor;	SubName: Full=Predicted protein {ECO:0000313|EMBL:BAJ98691.1, ECO:0000313|EnsemblPlants:HORVU6Hr1G069280.2};	Armadillo/beta-Catenin/plakoglobin	GO:0009507,chloroplast; GO:0005737,cytoplasm; GO:0005829,cytosol; GO:0005524,ATP binding; GO:0005525,GTP binding; GO:0004845,uracil phosphoribosyltransferase activity; GO:0004849,uridine kinase activity; GO:0044211,CTP salvage; GO:0006206,pyrimidine nucleobase metabolic process; GO:2000904,regulation of starch metabolic process; GO:0044206,UMP salvage	Phosphoribulokinase / Uridine kinase family
TRINITY_DN101681_c0_g1_i1.path1	1.96	2.81	2.13	0.47	0	0.21	9	16	10	2	0	1	0.104	-3.263	0.00571157	0.0169069	down	3C	303085219	303085508	-	TRINITY_DN101681_c0_g1_i1	--	--	putative polyprotein [Oryza sativa Japonica Group]	--	SubName: Full=Putative polyprotein {ECO:0000313|EMBL:AAV43898.1};	--	--	--
TRINITY_DN101685_c0_g1_i1.path1	0.43	0.17	0.21	3.69	3.38	4.12	2	1	1	16	18	20	15.73	3.975	3.76026e-05	0.00018172	up	7C	543939852	543940148	+	TRINITY_DN101685_c0_g1_i1	--	--	--	--	--	--	--	--
TRINITY_DN10169_c1_g1_i2.path1	1.99	0.45	0.54	7.22	8.23	6.44	18	5	5	60	84	60	8.158	3.028	5.02779e-09	4.22918e-08	up	2C	160084537	160085106	+	TRINITY_DN10169_c1_g1_i2	--	--	--	--	--	--	--	--
TRINITY_DN101692_c0_g1_i1.path2	1.44	0.74	0	13.08	8.46	7.24	11	7	0	92	73	57	14.535	3.861	1.15302e-11	1.28685e-10	up	4D	173449157	173449638	+	TRINITY_DN101692_c0_g1_i1	--	--	uncharacterized protein LOC109749447 [Aegilops tauschii subsp. tauschii]	--	SubName: Full=Uncharacterized protein {ECO:0000313|EnsemblPlants:HORVU1Hr1G061830.6};	--	--	--
TRINITY_DN10170_c0_g1_i4.path1	3.4	2.43	1.85	0.54	0.79	0.59	61	54	34	9	16	11	0.277	-1.853	0.000136589	0.000595108	down	3A	335526922	335529412	+	TRINITY_DN10170_c0_g1_i4	--	--	--	--	--	--	--	--
TRINITY_DN101703_c0_g1_i1.path1	1.35	2.02	1.13	0.21	0.17	0	7	13	6	1	1	0	0.091	-3.462	0.0140332	0.0368489	down	3C	11236559	11236886	+	TRINITY_DN101703_c0_g1_i1	--	--	--	--	--	--	--	--
TRINITY_DN101704_c0_g1_i1.path1	0.58	1.29	1.85	4.26	4.89	2.82	4	11	13	27	38	20	3.472	1.796	0.00212236	0.0071029	up	6D	201910665	201911098	+	TRINITY_DN101704_c0_g1_i1	--	--	--	--	--	--	--	--
TRINITY_DN10171_c0_g1_i1.path1	1.43	1.84	0.71	0	0	0.03	51	81	26	0	0	1	0.008	-6.926	6.69949e-08	4.87185e-07	down	2A	397683430	397687443	-	TRINITY_DN10171_c0_g1_i1	--	K04733 interleukin-1 receptor-associated kinase 4 [EC:2.7.11.1] | (RefSeq) probable leucine-rich repeat receptor-like protein kinase At1g68400 (A)	probable inactive receptor kinase At5g67200 [Aegilops tauschii subsp. tauschii]	RecName: Full=Probable inactive receptor kinase At5g67200; Flags: Precursor;	SubName: Full=Uncharacterized protein {ECO:0000313|EnsemblPlants:TRIAE_CS42_2AL_TGACv1_093575_AA0282860.1};	--	GO:0016021,integral component of membrane; GO:0005886,plasma membrane; GO:0005524,ATP binding; GO:0004672,protein kinase activity	Protein kinase domain
TRINITY_DN10171_c0_g1_i1.path2	0.11	0.34	0.19	0	0.05	0	4	15	7	0	2	0	0.089	-3.493	0.0186084	0.0468601	down	2D	346245309	346249331	+	TRINITY_DN10171_c0_g1_i1	--	K04733 interleukin-1 receptor-associated kinase 4 [EC:2.7.11.1] | (RefSeq) probable leucine-rich repeat receptor-like protein kinase At1g68400 (A)	probable inactive receptor kinase At5g67200 [Aegilops tauschii subsp. tauschii]	RecName: Full=Probable inactive receptor kinase At5g67200; Flags: Precursor;	SubName: Full=Uncharacterized protein {ECO:0000313|EnsemblPlants:TRIAE_CS42_2AL_TGACv1_093575_AA0282860.1};	--	GO:0016021,integral component of membrane; GO:0005886,plasma membrane; GO:0005524,ATP binding; GO:0004672,protein kinase activity	Protein kinase domain
TRINITY_DN101718_c0_g1_i1.path1	4.15	3.64	4.52	0.51	0.73	0.46	35	38	39	4	7	4	0.152	-2.717	6.35838e-06	3.49274e-05	down	7C	334468115	334468647	+	TRINITY_DN101718_c0_g1_i1	--	--	--	--	--	--	--	--
TRINITY_DN10173_c0_g1_i2.path1	3.18	3.57	4	33.69	28.42	41.01	171	238	220	1670	1730	2277	10.665	3.415	2.99301e-42	2.22091e-40	up	4A	109812888	109819642	-	TRINITY_DN10173_c0_g1_i2	--	K13447 respiratory burst oxidase [EC:1.6.3.- 1.11.1.-] | (RefSeq) LOC109750361; respiratory burst oxidase homolog protein B-like (A)	respiratory burst oxidase homolog protein B-like [Aegilops tauschii subsp. tauschii]	RecName: Full=Respiratory burst oxidase homolog protein C; EC=1.11.1.-; EC=1.6.3.-; AltName: Full=NADPH oxidase RBOHC; AltName: Full=StRBOHC;	SubName: Full=Uncharacterized protein {ECO:0000313|EnsemblPlants:TRIAE_CS42_4BL_TGACv1_321503_AA1061470.2};	Ferric reductase, NADH/NADPH oxidase and related proteins	GO:0016021,integral component of membrane; GO:0005509,calcium ion binding; GO:0050664,oxidoreductase activity, acting on NAD(P)H, oxygen as acceptor; GO:0004601,peroxidase activity	Ferric reductase NAD binding domain
TRINITY_DN10173_c0_g1_i2.path2	1.78	4.08	3	33.69	31	47.3	96	272	165	1670	1887	2626	14.204	3.828	3.27534e-36	1.83413e-34	up	4D	111791809	111798457	-	TRINITY_DN10173_c0_g1_i2	--	K13447 respiratory burst oxidase [EC:1.6.3.- 1.11.1.-] | (RefSeq) LOC109750361; respiratory burst oxidase homolog protein B-like (A)	respiratory burst oxidase homolog protein B-like [Aegilops tauschii subsp. tauschii]	RecName: Full=Respiratory burst oxidase homolog protein C; EC=1.11.1.-; EC=1.6.3.-; AltName: Full=NADPH oxidase RBOHC; AltName: Full=StRBOHC;	SubName: Full=Uncharacterized protein {ECO:0000313|EnsemblPlants:TRIAE_CS42_4BL_TGACv1_321503_AA1061470.2};	Ferric reductase, NADH/NADPH oxidase and related proteins	GO:0016021,integral component of membrane; GO:0005509,calcium ion binding; GO:0050664,oxidoreductase activity, acting on NAD(P)H, oxygen as acceptor; GO:0004601,peroxidase activity	Ferric reductase NAD binding domain
TRINITY_DN101731_c0_g1_i1.path1	2.2	2	1.34	0	0	0	8	9	5	0	0	0	0.029	-5.084	0.00194902	0.00658525	down	4D	400803307	400803536	+	TRINITY_DN101731_c0_g1_i1	--	--	--	--	--	--	--	--
TRINITY_DN101738_c0_g1_i1.path1	2.81	2.64	4.8	14.98	11.37	8.84	12	14	21	59	55	39	3.725	1.897	3.4838e-05	0.000169344	up	2A	369938973	369939242	-	TRINITY_DN101738_c0_g1_i1	--	--	hypothetical protein BRADI_5g18697v3 [Brachypodium distachyon]	--	SubName: Full=Uncharacterized protein {ECO:0000313|EMBL:KQJ84098.1};	--	--	--
TRINITY_DN101738_c0_g1_i1.path2	6.08	5.67	3.89	10.41	13.23	12.24	26	30	17	41	64	54	2.539	1.344	0.000844812	0.00312133	up	2D	368747097	368747366	+	TRINITY_DN101738_c0_g1_i1	--	--	hypothetical protein BRADI_5g18697v3 [Brachypodium distachyon]	--	SubName: Full=Uncharacterized protein {ECO:0000313|EMBL:KQJ84098.1};	--	--	--
TRINITY_DN10174_c0_g1_i5.path1	12.32	13.33	15.8	4.36	5.74	6.77	423	567	555	138	223	240	0.451	-1.149	1.78757e-05	9.12098e-05	down	4D	306535193	306539389	-	TRINITY_DN10174_c0_g1_i5	--	K08150 MFS transporter, SP family, solute carrier family 2 (myo-inositol transporter), member 13 | (RefSeq) inositol transporter 1 (A)	D-xylose-proton symporter-like 3, chloroplastic [Aegilops tauschii subsp. tauschii]	RecName: Full=D-xylose-proton symporter-like 3, chloroplastic; Flags: Precursor;	SubName: Full=Uncharacterized protein {ECO:0000313|EnsemblPlants:HORVU5Hr1G114020.2};	Predicted transporter (major facilitator superfamily)	GO:0009507,chloroplast; GO:0009941,chloroplast envelope; GO:0031969,chloroplast membrane; GO:0016021,integral component of membrane; GO:0005355,glucose transmembrane transporter activity; GO:0005351,carbohydrate:proton symporter activity; GO:0046323,glucose import; GO:0035428,NA	Sugar (and other) transporter
TRINITY_DN101747_c0_g1_i1.path1	0.23	0.93	0.9	4.99	3.18	4.38	3	15	12	60	47	59	6.684	2.741	1.05947e-07	7.51149e-07	up	5D	372582739	372583562	-	TRINITY_DN101747_c0_g1_i1	--	--	--	--	--	--	--	--
TRINITY_DN101747_c0_g1_i1.path2	1.53	1.73	1.2	5.07	3.93	5.13	20	28	16	61	58	69	3.504	1.809	6.25564e-06	3.44178e-05	up	4A	428289255	428290078	+	TRINITY_DN101747_c0_g1_i1	--	--	--	--	--	--	--	Domain of unknown function (DUF4492)
TRINITY_DN10175_c0_g1_i4.path1	8.28	7.81	8.93	3.06	4.94	2.14	203	237	224	69	137	54	0.437	-1.195	7.55127e-05	0.000345304	down	2C	233586542	233588089	+	TRINITY_DN10175_c0_g1_i4	--	--	--	--	--	--	--	--
TRINITY_DN10176_c0_g1_i8.path1	3.8	4	3.37	0.78	1.62	0.77	106	138	96	20	51	22	0.31	-1.689	2.78559e-06	1.61384e-05	down	6A	333064359	333069539	-	TRINITY_DN10176_c0_g1_i8	--	--	plectin-like isoform X1 [Aegilops tauschii subsp. tauschii]	--	SubName: Full=Uncharacterized protein {ECO:0000313|EnsemblPlants:TRIAE_CS42_7AS_TGACv1_569125_AA1807900.2};	--	--	Golgin subfamily A member 5
TRINITY_DN101769_c0_g1_i1.path1	0	0	0	0.31	3.74	1.64	0	0	0	1	15	6	43.192	5.433	0.00157417	0.0054493	up	5D	155231324	155231547	+	TRINITY_DN101769_c0_g1_i1	--	--	--	--	--	--	--	--
TRINITY_DN10177_c0_g1_i1.path1	1.09	1.59	1.9	20.23	19.38	27.72	33	60	59	567	667	870	16.38	4.034	6.02292e-41	4.22035e-39	up	7D	82516142	82522352	-	TRINITY_DN10177_c0_g1_i1	--	K12126 phytochrome-interacting factor 3 | (RefSeq) transcription factor PIF3 (A)	PREDICTED: transcription factor BIM2-like isoform X1 [Brachypodium distachyon]	RecName: Full=Transcription factor BIM2; AltName: Full=BES1-interacting Myc-like protein 2; AltName: Full=Basic helix-loop-helix protein 102; Short=AtbHLH102; Short=bHLH 102; AltName: Full=Transcription factor EN 125; AltName: Full=bHLH transcription factor bHLH102;	SubName: Full=Uncharacterized protein {ECO:0000313|EMBL:KQJ98764.1, ECO:0000313|EnsemblPlants:BRADI3G38970.1};	--	GO:0005634,nucleus; GO:0003700,DNA-binding transcription factor activity; GO:0046983,protein dimerization activity; GO:0043565,sequence-specific DNA binding; GO:0006351,transcription, DNA-templated	Helix-loop-helix DNA-binding domain
TRINITY_DN10177_c0_g1_i1.path2	1.14	1.32	1.75	10.69	12.13	16.53	35	50	55	302	421	523	10.403	3.379	3.87912e-27	1.36421e-25	up	5C	75434219	75439443	-	TRINITY_DN10177_c0_g1_i1	--	K16189 phytochrome-interacting factor 4 | (RefSeq) transcription factor PIF1-like (A)	PREDICTED: transcription factor BIM2-like isoform X1 [Brachypodium distachyon]	RecName: Full=Transcription factor BIM2; AltName: Full=BES1-interacting Myc-like protein 2; AltName: Full=Basic helix-loop-helix protein 102; Short=AtbHLH102; Short=bHLH 102; AltName: Full=Transcription factor EN 125; AltName: Full=bHLH transcription factor bHLH102;	SubName: Full=Uncharacterized protein {ECO:0000313|EMBL:KQJ98764.1, ECO:0000313|EnsemblPlants:BRADI3G38970.1};	--	GO:0005634,nucleus; GO:0003700,DNA-binding transcription factor activity; GO:0046983,protein dimerization activity; GO:0043565,sequence-specific DNA binding; GO:0006351,transcription, DNA-templated	Helix-loop-helix DNA-binding domain
TRINITY_DN101772_c0_g1_i1.path1	3.48	7.72	44.46	76.4	79.39	150.2	12	33	157	243	310	535	5.995	2.584	0.016643	0.0426904	up	3C	534052215	534052432	-	TRINITY_DN101772_c0_g1_i1	--	--	--	--	--	--	--	--
TRINITY_DN101778_c0_g1_i1.path1	90.12	110.06	100.47	8.11	13.21	9.21	398	602	454	33	66	42	0.112	-3.161	2.34985e-33	1.13974e-31	down	2D	337035484	337035762	-	TRINITY_DN101778_c0_g1_i1	--	K22733 magnesium transporter | (RefSeq) uncharacterized protein LOC102612526 (A)	predicted protein, partial [Hordeum vulgare subsp. vulgare]	RecName: Full=Pentatricopeptide repeat-containing protein At3g57430, chloroplastic; AltName: Full=Protein ORGANELLE TRANSCRIPT PROCESSING 84 {ECO:0000303|PubMed:19934379}; Flags: Precursor;	SubName: Full=Uncharacterized protein {ECO:0000313|EnsemblPlants:HORVU0Hr1G001760.1};	FOG: PPR repeat	GO:0009507,chloroplast; GO:0004519,endonuclease activity; GO:0003723,RNA binding; GO:0008270,zinc ion binding; GO:0031425,chloroplast RNA processing; GO:0006397,mRNA processing; GO:0009451,RNA modification	--
TRINITY_DN101778_c0_g1_i1.path2	40.22	45.87	36.87	2.71	8.23	4.4	177	250	166	11	41	20	0.138	-2.854	1.65829e-15	2.64886e-14	down	2D	333305734	333306011	+	TRINITY_DN101778_c0_g1_i1	--	K23541 Ca2+/H+ antiporter, TMEM165/GDT1 family | (RefSeq) pentatricopeptide repeat-containing protein At4g21065-like (A)	predicted protein, partial [Hordeum vulgare subsp. vulgare]	RecName: Full=Pentatricopeptide repeat-containing protein At3g57430, chloroplastic; AltName: Full=Protein ORGANELLE TRANSCRIPT PROCESSING 84 {ECO:0000303|PubMed:19934379}; Flags: Precursor;	SubName: Full=Uncharacterized protein {ECO:0000313|EnsemblPlants:HORVU0Hr1G001760.1};	FOG: PPR repeat	GO:0009507,chloroplast; GO:0004519,endonuclease activity; GO:0003723,RNA binding; GO:0008270,zinc ion binding; GO:0031425,chloroplast RNA processing; GO:0006397,mRNA processing; GO:0009451,RNA modification	PPR repeat
TRINITY_DN101778_c0_g1_i1.path3	29.85	32.14	33.02	3.01	2.25	0.9	129	172	146	12	11	4	0.07	-3.844	2.57393e-20	5.88213e-19	down	2C	560174526	560174798	-	TRINITY_DN101778_c0_g1_i1	--	K22733 magnesium transporter | (RefSeq) uncharacterized protein LOC102612526 (A)	predicted protein, partial [Hordeum vulgare subsp. vulgare]	RecName: Full=Pentatricopeptide repeat-containing protein At3g57430, chloroplastic; AltName: Full=Protein ORGANELLE TRANSCRIPT PROCESSING 84 {ECO:0000303|PubMed:19934379}; Flags: Precursor;	SubName: Full=Uncharacterized protein {ECO:0000313|EnsemblPlants:HORVU0Hr1G001760.1};	FOG: PPR repeat	GO:0009507,chloroplast; GO:0004519,endonuclease activity; GO:0003723,RNA binding; GO:0008270,zinc ion binding; GO:0031425,chloroplast RNA processing; GO:0006397,mRNA processing; GO:0009451,RNA modification	PPR repeat
TRINITY_DN10178_c0_g1_i1.path1	1.61	1.27	1.33	0.7	0.74	0.33	52	51	44	21	27	11	0.455	-1.137	0.0102538	0.0281588	down	4A	291662317	291664360	+	TRINITY_DN10178_c0_g1_i1	--	--	--	--	--	--	--	--
TRINITY_DN10178_c0_g2_i5.path1	2.23	2.1	1.54	0	0	0.12	89	104	63	0	0	5	0.023	-5.429	1.0407e-12	1.28671e-11	down	7A	431930287	431935632	+	TRINITY_DN10178_c0_g2_i5	--	--	--	--	--	--	--	--
TRINITY_DN101788_c0_g1_i1.path1	1.39	0.91	1.78	5.08	2.76	8.73	16	13	21	54	36	104	4.598	2.201	2.60409e-05	0.000129502	up	6C	515410853	515411673	-	TRINITY_DN101788_c0_g1_i1	--	K15378 solute carrier family 45, member 1/2/4 | (RefSeq) sucrose transport protein SUT4 isoform X1 (A)	PREDICTED: sucrose transport protein SUT4 isoform X1 [Oryza sativa Japonica Group]	RecName: Full=Sucrose transport protein SUT4; AltName: Full=Sucrose permease 4; AltName: Full=Sucrose transporter 4; Short=OsSUT4; AltName: Full=Sucrose-proton symporter 4;	SubName: Full=Uncharacterized protein {ECO:0000313|EnsemblPlants:OGLUM02G39250.2};	Sucrose transporter and related proteins	GO:0016021,integral component of membrane; GO:0005886,plasma membrane; GO:0015293,symporter activity; GO:0008643,carbohydrate transport; GO:0005985,sucrose metabolic process	MFS/sugar transport protein
TRINITY_DN101790_c0_g1_i1.path1	1.12	1.42	0.16	6.78	5.1	10.56	7	11	1	39	36	68	9.336	3.223	1.52469e-07	1.05936e-06	up	4A	439508018	439508411	-	TRINITY_DN101790_c0_g1_i1	--	K00799 glutathione S-transferase [EC:2.5.1.18] | (RefSeq) LOC109784139; probable glutathione S-transferase (A)	unnamed protein product [Triticum aestivum]	RecName: Full=Glutathione S-transferase U8; Short=AtGSTU8; EC=2.5.1.18; AltName: Full=GST class-tau member 8;	SubName: Full=Uncharacterized protein {ECO:0000313|EMBL:CDM86458.1, ECO:0000313|EnsemblPlants:TRIAE_CS42_3B_TGACv1_221332_AA0737510.1};	Glutathione S-transferase	GO:0005737,cytoplasm; GO:0005829,cytosol; GO:0004364,glutathione transferase activity; GO:0006749,glutathione metabolic process; GO:0046686,response to cadmium ion; GO:0009407,toxin catabolic process	--
TRINITY_DN1018_c0_g1_i6.path2	13.27	13.35	16.39	30.39	27.5	30.38	341	425	431	720	800	806	2.257	1.174	1.54484e-07	1.07249e-06	up	3D	52954687	52960450	-	TRINITY_DN1018_c0_g1_i6	--	K08488 syntaxin 7 | (RefSeq) LOC109769563; syntaxin-22-like (A)	predicted protein [Hordeum vulgare subsp. vulgare]	RecName: Full=Syntaxin-22; Short=AtSYP22; Short=AtVAM3; AltName: Full=Protein SHOOT GRAVITROPISM 3;	SubName: Full=Predicted protein {ECO:0000313|EMBL:BAJ97706.1, ECO:0000313|EnsemblPlants:HORVU3Hr1G035380.1};	SNARE protein PEP12/VAM3/Syntaxin 7/Syntaxin 17	GO:0016021,integral component of membrane; GO:0031902,late endosome membrane; GO:0000325,plant-type vacuole; GO:0009705,plant-type vacuole membrane; GO:0031201,SNARE complex; GO:0005773,vacuole; GO:0005484,SNAP receptor activity; GO:0000149,SNARE binding; GO:0009660,amyloplast organization; GO:0006886,intracellular protein transport; GO:0009959,negative gravitropism; GO:0010118,stomatal movement;…	Syntaxin-like protein
TRINITY_DN10181_c0_g1_i4.path1	6.57	5.33	3.89	1.38	1.17	0.92	228	229	138	44	46	33	0.24	-2.057	3.78001e-11	4.01246e-10	down	1D	350539197	350547012	-	TRINITY_DN10181_c0_g1_i4	--	K04077 chaperonin GroEL | (RefSeq) LOC109765736; chaperonin CPN60-like 2, mitochondrial (A)	chaperonin CPN60-like 2, mitochondrial [Aegilops tauschii subsp. tauschii]	RecName: Full=Chaperonin CPN60-like 2, mitochondrial; AltName: Full=HSP60-like 2; Flags: Precursor;	SubName: Full=Uncharacterized protein {ECO:0000313|EnsemblPlants:TRIAE_CS42_1DL_TGACv1_063075_AA0223600.1};	Mitochondrial chaperonin, Cpn60/Hsp60p	GO:0005829,cytosol; GO:0005739,mitochondrion; GO:0005774,vacuolar membrane; GO:0005524,ATP binding; GO:0044183,protein binding involved in protein folding; GO:0051082,unfolded protein binding; GO:0006458,'de novo' protein folding; GO:0061077,chaperone-mediated protein folding; GO:0045041,protein import into mitochondrial intermembrane space; GO:0042026,protein refolding; GO:0046686,response to ca…	TCP-1/cpn60 chaperonin family
TRINITY_DN10181_c0_g1_i4.path2	13.85	12.22	9.92	3.52	2.44	1.82	487	532	357	114	97	66	0.235	-2.091	5.33456e-15	8.17478e-14	down	1A	365021647	365026894	-	TRINITY_DN10181_c0_g1_i4	--	--	--	--	--	--	--	--
TRINITY_DN101810_c0_g1_i1.path1	1.97	4.37	4.08	105.35	98.84	170.28	8	22	17	395	455	715	40.187	5.329	1.08919e-44	8.85856e-43	up	4D	337120076	337120332	-	TRINITY_DN101810_c0_g1_i1	--	--	--	--	--	--	--	--
TRINITY_DN101814_c0_g1_i1.path1	0.48	0.7	0.47	0	0	0.09	5	9	5	0	0	1	0.067	-3.89	0.0180962	0.0457986	down	3A	347602957	347603612	-	TRINITY_DN101814_c0_g1_i1	--	--	--	--	--	--	--	--
TRINITY_DN101816_c0_g1_i1.path1	0.4	0.16	0.78	4.56	5.3	4.26	2	1	4	21	30	22	11.757	3.555	6.23421e-06	3.43101e-05	up	6C	340998119	340998434	+	TRINITY_DN101816_c0_g1_i1	--	--	--	--	--	--	--	--
TRINITY_DN101820_c0_g1_i1.path1	10.74	13.34	10.09	24.42	27.55	29.8	52	80	50	109	151	149	2.653	1.408	1.7452e-06	1.04361e-05	up	1C	328435910	328436215	+	TRINITY_DN101820_c0_g1_i1	--	--	--	--	--	--	--	--
TRINITY_DN101822_c0_g1_i1.path1	0	0.17	0.21	29.7	23.08	21.22	0	1	1	130	124	104	210.32	7.716	5.96965e-13	7.5739e-12	up	4D	349873972	349874271	+	TRINITY_DN101822_c0_g1_i1	--	--	--	--	--	--	--	--
TRINITY_DN101822_c0_g1_i1.path2	0	0	0.21	2.51	1.67	1.43	0	0	1	11	9	7	29.209	4.868	0.00114056	0.00408548	up	4A	427169168	427169467	+	TRINITY_DN101822_c0_g1_i1	--	--	--	--	--	--	--	--
TRINITY_DN101829_c0_g1_i1.path1	0.82	1.5	0.2	8.71	4.55	6.98	4	9	1	39	25	35	8.774	3.133	2.67957e-06	1.5558e-05	up	2A	392689653	392690132	+	TRINITY_DN101829_c0_g1_i1	--	--	transcription factor bHLH112-like [Aegilops tauschii subsp. tauschii]	--	SubName: Full=Uncharacterized protein {ECO:0000313|EnsemblPlants:TRIAE_CS42_2DL_TGACv1_160980_AA0555700.4};	--	GO:0046983,protein dimerization activity	--
TRINITY_DN10184_c2_g1_i1.path1	2.66	1.66	1.79	0.72	0.49	0.16	48	37	33	12	10	3	0.24	-2.058	0.000341225	0.00137472	down	1D	482143583	482144930	+	TRINITY_DN10184_c2_g1_i1	--	K06911 uncharacterized protein | (RefSeq) F-box/LRR-repeat protein At3g59200-like isoform X1 (A)	putative F-box/FBD/LRR-repeat protein At5g56810 [Aegilops tauschii subsp. tauschii]	RecName: Full=FBD-associated F-box protein At1g66310;	SubName: Full=Uncharacterized protein {ECO:0000313|EnsemblPlants:TRIAE_CS42_1BL_TGACv1_033496_AA0139920.4};	--	--	FBD
TRINITY_DN101841_c0_g1_i1.path2	0	0.18	0	28.81	38.43	33.71	0	1	0	116	190	152	488.837	8.933	2.19522e-13	2.90013e-12	up	4D	302386364	302386639	+	TRINITY_DN101841_c0_g1_i1	--	--	--	--	--	--	--	--
TRINITY_DN10185_c0_g1_i1.path1	0.95	0.79	1.11	11.24	10.6	15.05	32	33	38	348	403	522	14.433	3.851	1.92588e-35	1.04151e-33	up	7C	529885198	529888124	+	TRINITY_DN10185_c0_g1_i1	--	--	predicted protein [Hordeum vulgare subsp. vulgare]	RecName: Full=F-box protein At5g39450;	SubName: Full=Predicted protein {ECO:0000313|EMBL:BAK01799.1};	--	--	F-box domain
TRINITY_DN10185_c0_g1_i1.path2	0.15	0.17	0.26	6.41	6.96	7.92	5	7	9	198	264	274	40.896	5.354	3.41052e-37	2.00255e-35	up	7D	359097303	359100235	+	TRINITY_DN10185_c0_g1_i1	--	--	predicted protein [Hordeum vulgare subsp. vulgare]	RecName: Full=F-box protein At5g39450;	SubName: Full=Uncharacterized protein {ECO:0000313|EnsemblPlants:TRIAE_CS42_U_TGACv1_641214_AA2088520.1};	--	--	F-box domain
TRINITY_DN10185_c0_g1_i1.path3	0.42	0.41	0.38	6.35	6.52	6.83	14	17	13	197	248	237	18.132	4.18	2.94388e-35	1.57738e-33	up	7A	36308046	36310987	-	TRINITY_DN10185_c0_g1_i1	--	--	--	--	--	--	--	--
TRINITY_DN101852_c0_g1_i1.path1	0	0	0.31	2.07	1.26	2	0	0	2	12	9	13	19.659	4.297	0.00109517	0.0039384	up	7D	498119521	498119918	-	TRINITY_DN101852_c0_g1_i1	--	--	--	--	--	--	--	--
TRINITY_DN101856_c0_g1_i1.path1	0.1	0	0	1.19	0.88	1.16	1	0	0	11	10	12	36.024	5.171	0.000349548	0.00140533	up	6A	57674601	57675235	+	TRINITY_DN101856_c0_g1_i1	--	--	--	--	--	--	--	--
TRINITY_DN101870_c0_g1_i1.path1	0	0	0	0.74	0.8	1.1	0	0	0	3	4	5	25.415	4.668	0.0117048	0.0315533	up	6A	272822401	272822679	+	TRINITY_DN101870_c0_g1_i1	--	--	--	--	--	--	--	--
TRINITY_DN101871_c0_g1_i1.path1	0.12	0.09	0	231.1	229.81	225.31	1	1	0	1851	2260	2021	3591.63	11.81	8.14722e-30	3.33352e-28	up	6D	277862617	277863311	+	TRINITY_DN101871_c0_g1_i1	--	K14157 alpha-aminoadipic semialdehyde synthase [EC:1.5.1.8 1.5.1.9] | (RefSeq) alpha-aminoadipic semialdehyde synthase (A)	Alpha-aminoadipic semialdehyde synthase [Triticum urartu]	RecName: Full=Alpha-aminoadipic semialdehyde synthase; AltName: Full=cAt-LKR/SDH; Short=LKR/SDH; Includes: RecName: Full=Lysine ketoglutarate reductase; Short=LKR; EC=1.5.1.8; Includes: RecName: Full=Saccharopine dehydrogenase; EC=1.5.1.9; AltName: Full=cAt-SDH; Short=SDH;	SubName: Full=Alpha-aminoadipic semialdehyde synthase {ECO:0000313|EMBL:EMT26845.1, ECO:0000313|EnsemblPlants:EMT26845};	Lysine-ketoglutarate reductase/saccharopine dehydrogenase	GO:0005737,cytoplasm; GO:0047131,saccharopine dehydrogenase (NAD+, L-glutamate-forming) activity; GO:0047130,saccharopine dehydrogenase (NADP+, L-lysine-forming) activity; GO:0004753,saccharopine dehydrogenase activity; GO:0006091,generation of precursor metabolites and energy; GO:0033512,L-lysine catabolic process to acetyl-CoA via saccharopine; GO:0019878,lysine biosynthetic process via aminoad…	--
TRINITY_DN101877_c0_g1_i1.path1	3.84	10.08	6.57	21.88	19.34	18.6	20	65	35	105	114	100	3.209	1.682	3.2882e-06	1.88323e-05	up	1A	513213172	513213500	+	TRINITY_DN101877_c0_g1_i1	--	--	--	--	--	--	--	Domain of unknown function (DUF4666)
TRINITY_DN10188_c0_g1_i2.path1	0	0	0	1.5	1.78	2.44	0	0	0	11	16	20	99.454	6.636	2.08554e-06	1.23273e-05	up	3A	18606292	18606792	-	TRINITY_DN10188_c0_g1_i2	--	--	--	--	--	--	--	--
TRINITY_DN10188_c0_g1_i2.path2	0	0	0	1.78	1	1.47	0	0	0	13	9	12	72.818	6.186	2.31568e-05	0.000116133	up	3D	343087011	343087631	+	TRINITY_DN10188_c0_g1_i2	--	--	--	--	--	--	--	--
TRINITY_DN101889_c0_g1_i1.path1	86.11	115.01	172.84	20.08	17.07	14.62	428	708	879	92	96	75	0.15	-2.738	5.80281e-20	1.29001e-18	down	5A	20472443	20473597	-	TRINITY_DN101889_c0_g1_i1	--	--	--	--	--	--	--	--
TRINITY_DN10189_c0_g1_i9.path2	0.39	0.48	0.71	1.21	1.39	2.04	12	18	22	34	48	64	3.278	1.713	0.000301732	0.00122654	up	1D	63237832	63244573	+	TRINITY_DN10189_c0_g1_i9	--	--	--	--	--	--	--	--
TRINITY_DN10189_c0_g1_i9.path3	1.54	2.02	1.54	3.89	4.38	6.37	47	76	48	109	151	200	3.216	1.685	3.52695e-07	2.33355e-06	up	1A	66169728	66176643	+	TRINITY_DN10189_c0_g1_i9	--	--	--	--	--	--	--	--
TRINITY_DN1019_c0_g1_i1.path1	0.04	0	0	0.34	0.14	0.58	1	0	0	8	4	15	30.549	4.933	0.00129294	0.00457257	up	2A	328660410	328663683	+	TRINITY_DN1019_c0_g1_i1	--	K01785 aldose 1-epimerase [EC:5.1.3.3] | (RefSeq) LOC109731786; aldose 1-epimerase-like (A)	aldose 1-epimerase-like [Aegilops tauschii subsp. tauschii]	--	RecName: Full=Aldose 1-epimerase {ECO:0000256|PIRNR:PIRNR005096}; EC=5.1.3.3 {ECO:0000256|PIRNR:PIRNR005096}; AltName: Full=Galactose mutarotase {ECO:0000256|PIRNR:PIRNR005096};	Predicted mutarotase	GO:0004034,aldose 1-epimerase activity; GO:0030246,carbohydrate binding; GO:0019318,hexose metabolic process	Aldose 1-epimerase
TRINITY_DN1019_c0_g1_i1.path2	0	0	0	0.69	0.71	0.08	0	0	0	16	20	2	76.458	6.257	4.36873e-05	0.000208581	up	2D	405791158	405794420	-	TRINITY_DN1019_c0_g1_i1	--	K01785 aldose 1-epimerase [EC:5.1.3.3] | (RefSeq) LOC109731786; aldose 1-epimerase-like (A)	predicted protein [Hordeum vulgare subsp. vulgare]	--	RecName: Full=Aldose 1-epimerase {ECO:0000256|PIRNR:PIRNR005096}; EC=5.1.3.3 {ECO:0000256|PIRNR:PIRNR005096}; AltName: Full=Galactose mutarotase {ECO:0000256|PIRNR:PIRNR005096};	Predicted mutarotase	GO:0004034,aldose 1-epimerase activity; GO:0030246,carbohydrate binding; GO:0019318,hexose metabolic process	Aldose 1-epimerase
TRINITY_DN1019_c0_g2_i1.path1	0	0	0	0.09	0.15	0.21	0	0	0	2	4	5	23.191	4.536	0.0178241	0.0452279	up	6A	295758880	295763489	-	TRINITY_DN1019_c0_g2_i1	--	K01785 aldose 1-epimerase [EC:5.1.3.3] | (RefSeq) LOC109765784; aldose 1-epimerase-like (A)	aldose 1-epimerase-like [Aegilops tauschii subsp. tauschii]	--	RecName: Full=Aldose 1-epimerase {ECO:0000256|PIRNR:PIRNR005096}; EC=5.1.3.3 {ECO:0000256|PIRNR:PIRNR005096}; AltName: Full=Galactose mutarotase {ECO:0000256|PIRNR:PIRNR005096};	Predicted mutarotase	GO:0004034,aldose 1-epimerase activity; GO:0030246,carbohydrate binding; GO:0019318,hexose metabolic process	Aldose 1-epimerase
TRINITY_DN101902_c0_g1_i1.path1	0.55	0.74	0.54	4.95	5.49	7.08	3	5	3	25	34	40	10.664	3.415	2.3039e-07	1.56253e-06	up	2C	35661631	35661976	+	TRINITY_DN101902_c0_g1_i1	--	K00951 GTP pyrophosphokinase [EC:2.7.6.5] | (RefSeq) LOC109771701; probable GTP diphosphokinase RSH3, chloroplastic isoform X1 (A)	probable GTP diphosphokinase RSH3, chloroplastic isoform X2 [Aegilops tauschii subsp. tauschii]	--	SubName: Full=Uncharacterized protein {ECO:0000313|EnsemblPlants:TRIAE_CS42_2DS_TGACv1_179769_AA0609090.3};	--	--	--
TRINITY_DN10191_c0_g1_i3.path1	6.44	5.2	4.13	1.89	1.75	1.24	166	166	109	45	51	33	0.338	-1.565	6.74576e-07	4.28414e-06	down	4C	106507154	106508781	-	TRINITY_DN10191_c0_g1_i3	--	--	--	--	--	--	--	--
TRINITY_DN10191_c1_g1_i1.path1	117.65	94.25	76.06	9.44	14.16	6.65	514	510	340	38	70	30	0.115	-3.126	2.36701e-26	7.96343e-25	down	2C	211165728	211166003	+	TRINITY_DN10191_c1_g1_i1	--	--	--	--	--	--	--	--
TRINITY_DN101919_c0_g1_i1.path1	12.28	11.81	12.01	1.48	2.76	2.83	63	75	63	7	16	15	0.218	-2.198	7.21516e-07	4.56245e-06	down	1C	450454345	450454668	+	TRINITY_DN101919_c0_g1_i1	--	--	--	--	--	--	--	--
TRINITY_DN101922_c0_g1_i1.path1	0	0	0	0.96	1.3	0.86	0	0	0	3	5	3	22.653	4.502	0.0185286	0.0466938	up	6C	400654395	400654608	-	TRINITY_DN101922_c0_g1_i1	--	--	--	--	--	--	--	--
TRINITY_DN101923_c0_g1_i1.path1	0	0.14	0.17	5.07	5.05	4.36	0	1	1	27	33	26	50.239	5.651	1.00949e-06	6.25684e-06	up	7A	37474153	37474517	-	TRINITY_DN101923_c0_g1_i1	--	--	hypothetical protein OsI_27537 [Oryza sativa Indica Group]	RecName: Full=Pectinesterase inhibitor 28 {ECO:0000305}; AltName: Full=Pectin methylesterase inhibitor 28 {ECO:0000303|PubMed:26874295}; Short=OsPMEI28 {ECO:0000303|PubMed:26874295}; Flags: Precursor;	SubName: Full=Uncharacterized protein {ECO:0000313|EnsemblPlants:OBART08G00600.1};	--	GO:0048046,apoplast; GO:0004857,enzyme inhibitor activity; GO:0046910,pectinesterase inhibitor activity; GO:0040008,regulation of growth	--
TRINITY_DN101926_c0_g1_i1.path1	3.22	3.9	2.42	0.54	0.33	0.36	26	39	20	4	3	3	0.14	-2.836	6.03811e-05	0.000281304	down	5A	393352647	393353156	-	TRINITY_DN101926_c0_g1_i1	--	--	--	--	--	--	--	--
TRINITY_DN101927_c0_g1_i1.path1	0.59	2.87	2.9	6.44	4.98	8.05	2	12	10	20	19	28	3.381	1.757	0.00811488	0.0229898	up	6C	94096507	94096719	-	TRINITY_DN101927_c0_g1_i1	--	--	--	--	--	--	--	--
TRINITY_DN101931_c0_g1_i1.path1	0.98	0.61	1.27	9.17	4.69	14.8	9	7	12	78	49	141	11.403	3.511	6.3114e-11	6.5429e-10	up	2C	85953439	85954021	+	TRINITY_DN101931_c0_g1_i1	--	--	--	--	--	--	--	--
TRINITY_DN101935_c0_g1_i1.path1	15.04	10.28	9.72	1.51	0.41	1.35	65	55	43	6	2	6	0.101	-3.309	2.40567e-08	1.85792e-07	down	Chr00	61295261	61295533	+	TRINITY_DN101935_c0_g1_i1	--	--	--	--	--	--	--	--
TRINITY_DN101937_c0_g1_i1.path1	0	0	0	2.97	2.98	2.45	0	0	0	13	16	12	85.55	6.419	5.74015e-06	3.17449e-05	up	7A	315114503	315114802	-	TRINITY_DN101937_c0_g1_i1	--	--	predicted protein, partial [Hordeum vulgare subsp. vulgare]	--	SubName: Full=Predicted protein {ECO:0000313|EMBL:BAK01627.1}; Flags: Fragment;	--	--	--
TRINITY_DN101937_c0_g1_i1.path2	0	0	0	0.46	4.09	1.63	0	0	0	2	22	8	62.678	5.97	0.0001661	0.000712257	up	7D	90246632	90246931	+	TRINITY_DN101937_c0_g1_i1	--	--	predicted protein, partial [Hordeum vulgare subsp. vulgare]	--	SubName: Full=Predicted protein {ECO:0000313|EMBL:BAK01627.1}; Flags: Fragment;	--	--	--
TRINITY_DN10194_c2_g1_i1.path1	0	0	0	239.83	220.44	223.85	0	0	0	1634	1844	1708	10919.6	13.415	3.65068e-29	1.43811e-27	up	7C	555201107	555201573	+	TRINITY_DN10194_c2_g1_i1	--	--	--	--	--	--	--	--
TRINITY_DN101946_c0_g1_i1.path1	0.57	0.76	1.66	0.1	0	0	6	10	18	1	0	0	0.036	-4.8	0.0013551	0.0047703	down	4A	32423584	32424253	-	TRINITY_DN101946_c0_g1_i1	--	--	--	--	--	--	--	--
TRINITY_DN101948_c0_g1_i1.path1	1.74	1.33	0.94	5.35	1.54	3.56	18	17	10	51	18	38	2.883	1.528	0.006217	0.0182137	up	3A	341465939	341472304	-	TRINITY_DN101948_c0_g1_i1	--	K10761 tRNA(His) guanylyltransferase [EC:2.7.7.79] | (RefSeq) tRNA(His) guanylyltransferase 1-like (A)	PREDICTED: tRNA(His) guanylyltransferase 1-like isoform X2 [Brachypodium distachyon]	RecName: Full=tRNA(His) guanylyltransferase 2; EC=2.7.7.79;	SubName: Full=Uncharacterized protein {ECO:0000313|EnsemblPlants:HORVU3Hr1G032740.20};	Uncharacterized conserved protein	GO:0005654,nucleoplasm; GO:0005525,GTP binding; GO:0000287,magnesium ion binding; GO:0008193,tRNA guanylyltransferase activity; GO:0006400,tRNA modification; GO:0008033,tRNA processing	tRNAHis guanylyltransferase
TRINITY_DN10195_c0_g1_i3.path1	5.76	5.51	3.64	1.63	2.35	1.97	65	77	42	17	30	23	0.443	-1.176	0.00368447	0.0115236	down	4A	393657208	393658685	-	TRINITY_DN10195_c0_g1_i3	--	--	uncharacterized protein At1g27050 [Aegilops tauschii subsp. tauschii]	RecName: Full=Uncharacterized protein At1g27050;	SubName: Full=Uncharacterized protein {ECO:0000313|EnsemblPlants:TRIAE_CS42_3AL_TGACv1_194961_AA0642780.1};	Transcription factor HEX, contains HOX and HALZ domains	GO:0003700,DNA-binding transcription factor activity; GO:0003723,RNA binding; GO:0006351,transcription, DNA-templated	--
TRINITY_DN10195_c0_g1_i3.path2	4.52	5.58	3.46	1.73	2.11	1.37	51	78	40	18	27	16	0.423	-1.243	0.00284851	0.00920908	down	3D	372809028	372810512	-	TRINITY_DN10195_c0_g1_i3	--	--	uncharacterized protein At1g27050 [Aegilops tauschii subsp. tauschii]	RecName: Full=Uncharacterized protein At1g27050;	SubName: Full=Uncharacterized protein {ECO:0000313|EnsemblPlants:TRIAE_CS42_3AL_TGACv1_194961_AA0642780.1};	Transcription factor HEX, contains HOX and HALZ domains	GO:0003700,DNA-binding transcription factor activity; GO:0003723,RNA binding; GO:0006351,transcription, DNA-templated	RNA recognition motif. (a.k.a. RRM, RBD, or RNP domain)
TRINITY_DN101951_c0_g1_i1.path1	2.33	5.65	6.49	0.39	1.27	1.39	13	39	37	2	8	8	0.236	-2.085	0.00233827	0.00773566	down	5D	497953816	497954167	-	TRINITY_DN101951_c0_g1_i1	--	K00052 3-isopropylmalate dehydrogenase [EC:1.1.1.85] | (RefSeq) 3-isopropylmalate dehydrogenase, chloroplastic-like (A)	3-isopropylmalate dehydrogenase, chloroplastic [Setaria italica]	RecName: Full=3-isopropylmalate dehydrogenase, chloroplastic; Short=3-IPM-DH; Short=IMDH; EC=1.1.1.85; AltName: Full=Beta-IPM dehydrogenase; Flags: Precursor;	RecName: Full=3-isopropylmalate dehydrogenase {ECO:0000256|RuleBase:RU004445}; EC=1.1.1.85 {ECO:0000256|RuleBase:RU004445};	3-isopropylmalate dehydrogenase	GO:0009507,chloroplast; GO:0003862,3-isopropylmalate dehydrogenase activity; GO:0000287,magnesium ion binding; GO:0051287,NAD binding; GO:0009098,leucine biosynthetic process	--
TRINITY_DN101954_c0_g1_i1.path1	11.54	9.64	8.69	1.55	2.1	1.71	170	176	131	21	35	26	0.198	-2.34	4.76776e-13	6.10306e-12	down	6C	390099127	390100347	-	TRINITY_DN101954_c0_g1_i1	--	--	--	--	--	--	--	--
TRINITY_DN101959_c0_g1_i1.path2	0.98	1.58	2.27	0.4	0.22	0.12	8	16	19	3	2	1	0.161	-2.633	0.00574333	0.016989	down	6D	156460959	156461475	-	TRINITY_DN101959_c0_g1_i1	--	--	predicted protein [Hordeum vulgare subsp. vulgare]	RecName: Full=Type I inositol polyphosphate 5-phosphatase 5 {ECO:0000305}; Short=At5PTase5 {ECO:0000305}; EC=3.1.3.- {ECO:0000305}; AltName: Full=Protein BRISTLED 1 {ECO:0000303|PubMed:11041890}; AltName: Full=Protein DEFORMED ROOT HAIRS 4 {ECO:0000303|PubMed:15863435};	SubName: Full=Uncharacterized protein {ECO:0000313|EnsemblPlants:HORVU6Hr1G075060.24};	Inositol polyphosphate 5-phosphatase and related proteins	GO:0016787,hydrolase activity; GO:0009932,cell tip growth; GO:0046856,phosphatidylinositol dephosphorylation; GO:0010053,root epidermal cell differentiation; GO:0048765,root hair cell differentiation; GO:0048766,root hair initiation	--
TRINITY_DN101967_c0_g1_i1.path1	1.39	1.12	1.35	0	0.18	0	7	7	7	0	1	0	0.059	-4.084	0.0107991	0.0294518	down	4C	433759397	433759715	-	TRINITY_DN101967_c0_g1_i1	--	--	--	--	--	--	--	--
TRINITY_DN101979_c0_g1_i1.path1	11.98	7.05	12.55	0.74	0.61	0.83	70	51	75	4	4	5	0.075	-3.738	1.69981e-10	1.67988e-09	down	4D	338408428	338408796	+	TRINITY_DN101979_c0_g1_i1	--	--	--	--	--	--	--	--
TRINITY_DN10199_c0_g1_i1.path1	9.48	6.47	4.57	2.46	2.6	1.29	71	60	35	17	22	10	0.337	-1.57	0.000790198	0.00293773	down	7A	96077663	96078135	-	TRINITY_DN10199_c0_g1_i1	--	--	--	--	--	--	--	--
TRINITY_DN10199_c0_g1_i1.path2	5.35	6.38	4.71	1.6	1.89	0.78	40	59	36	11	16	6	0.283	-1.823	0.000244754	0.00101445	down	7D	298274550	298275021	+	TRINITY_DN10199_c0_g1_i1	--	--	--	--	--	--	--	--
TRINITY_DN101992_c0_g1_i1.path1	3.27	2.54	1.97	0.96	0.11	0.24	26	25	16	7	1	2	0.178	-2.488	0.00179596	0.00612587	down	6A	159630071	159630572	-	TRINITY_DN101992_c0_g1_i1	--	--	--	--	--	--	--	--
TRINITY_DN101999_c0_g1_i1.path1	0	0	0	2.72	0.91	2.43	0	0	0	17	7	17	89.625	6.486	7.06915e-06	3.85227e-05	up	6A	297293681	297294108	-	TRINITY_DN101999_c0_g1_i1	--	--	--	--	--	--	--	--
TRINITY_DN10200_c0_g1_i3.path1	72.27	65.8	66.38	14.16	16.41	10.64	2923	3296	2747	528	751	444	0.219	-2.191	3.58159e-29	1.41269e-27	down	5A	484966112	484970862	+	TRINITY_DN10200_c0_g1_i3	--	K08193 MFS transporter, ACS family, solute carrier family 17 (sodium-dependent inorganic phosphate cotransporter), other | (RefSeq) probable anion transporter 4, chloroplastic (A)	PREDICTED: probable anion transporter 4, chloroplastic [Brachypodium distachyon]	RecName: Full=Probable anion transporter 4, chloroplastic; AltName: Full=Phosphate transporter 4;4; Flags: Precursor;	SubName: Full=Uncharacterized protein {ECO:0000313|EMBL:KQJ91627.1, ECO:0000313|EnsemblPlants:BRADI4G38740.1};	Permease of the major facilitator superfamily	GO:0009706,chloroplast inner membrane; GO:0016021,integral component of membrane; GO:0009536,plastid; GO:0005315,inorganic phosphate transmembrane transporter activity; GO:0015229,L-ascorbic acid transmembrane transporter activity; GO:0098656,anion transmembrane transport; GO:0010028,xanthophyll cycle	Major Facilitator Superfamily
TRINITY_DN10200_c0_g1_i3.path2	66.95	63.36	59.48	14.67	19.34	13.95	2604	3052	2367	526	851	560	0.276	-1.856	3.93335e-22	1.01522e-20	down	5D	433226508	433230835	+	TRINITY_DN10200_c0_g1_i3	--	K08193 MFS transporter, ACS family, solute carrier family 17 (sodium-dependent inorganic phosphate cotransporter), other | (RefSeq) probable anion transporter 4, chloroplastic (A)	PREDICTED: probable anion transporter 4, chloroplastic [Brachypodium distachyon]	RecName: Full=Probable anion transporter 4, chloroplastic; AltName: Full=Phosphate transporter 4;4; Flags: Precursor;	SubName: Full=Uncharacterized protein {ECO:0000313|EMBL:KQJ91627.1, ECO:0000313|EnsemblPlants:BRADI4G38740.1};	Permease of the major facilitator superfamily	GO:0009706,chloroplast inner membrane; GO:0016021,integral component of membrane; GO:0009536,plastid; GO:0005315,inorganic phosphate transmembrane transporter activity; GO:0015229,L-ascorbic acid transmembrane transporter activity; GO:0098656,anion transmembrane transport; GO:0010028,xanthophyll cycle	Major Facilitator Superfamily
TRINITY_DN10200_c0_g4_i1.path1	34.15	29.57	27.11	11.14	17.71	11.95	346	371	281	104	203	125	0.492	-1.023	5.32698e-05	0.000250442	down	7C	616627126	616627765	-	TRINITY_DN10200_c0_g4_i1	--	--	--	--	--	--	--	--
TRINITY_DN10202_c0_g1_i3.path1	1.56	2.08	1.98	8.48	14.3	6.59	17	28	22	85	176	74	5.655	2.499	6.37463e-11	6.60477e-10	up	4C	501047340	501048102	+	TRINITY_DN10202_c0_g1_i3	--	--	protein PYRICULARIA ORYZAE RESISTANCE 21-like [Aegilops tauschii subsp. tauschii]	RecName: Full=Protein PYRICULARIA ORYZAE RESISTANCE 21 {ECO:0000303|PubMed:19696351}; Short=Pi21 {ECO:0000303|PubMed:19696351};	SubName: Full=Uncharacterized protein {ECO:0000313|EnsemblPlants:TRIAE_CS42_5DL_TGACv1_436075_AA1457700.1};	--	GO:0046872,metal ion binding; GO:0006952,defense response; GO:1900150,regulation of defense response to fungus; GO:0009623,response to parasitic fungus	Heavy-metal-associated domain
TRINITY_DN102031_c0_g1_i1.path1	6.06	7.99	11.23	21.12	15.65	19.32	38	62	72	122	111	125	2.436	1.285	0.000152646	0.000659055	up	7C	165388825	165395029	-	TRINITY_DN102031_c0_g1_i1	--	--	--	--	--	--	--	--
TRINITY_DN102046_c0_g1_i1.path1	0	0	0	0.63	0.61	0.78	0	0	0	5	6	7	38.089	5.251	0.00155757	0.00539896	up	1C	403958950	403959623	+	TRINITY_DN102046_c0_g1_i1	--	--	--	--	--	--	--	--
TRINITY_DN10205_c0_g1_i1.path1	2.24	2.09	1.99	3.65	4.46	3.94	32	37	29	48	72	58	2.099	1.07	0.00324725	0.0103198	up	7A	48666090	48667858	+	TRINITY_DN10205_c0_g1_i1	--	--	--	--	--	--	--	--
TRINITY_DN10206_c0_g2_i2.path2	3.52	5.19	3.35	6.71	9.68	5.77	74	135	72	130	230	125	2.009	1.006	0.000501711	0.00194869	up	6A	14018419	14020666	+	TRINITY_DN10206_c0_g2_i2	--	--	hypothetical protein TRIUR3_31162 [Triticum urartu]	RecName: Full=F-box protein At4g00755;	SubName: Full=Uncharacterized protein {ECO:0000313|EnsemblPlants:TRIAE_CS42_6BS_TGACv1_513211_AA1634630.2};	--	--	F-box-like
TRINITY_DN102060_c0_g1_i1.path2	2.17	3.63	4.54	0	0.41	0.6	14	29	30	0	3	4	0.111	-3.17	0.000187084	0.000794046	down	7A	321408768	321409175	-	TRINITY_DN102060_c0_g1_i1	--	--	--	--	--	--	--	--
TRINITY_DN102062_c0_g1_i1.path1	4.2	4.18	6.71	7.14	12.63	11.4	30	37	49	47	102	84	2.272	1.184	0.00254624	0.00834131	up	5D	486639958	486640408	-	TRINITY_DN102062_c0_g1_i1	--	--	--	--	--	--	--	--
TRINITY_DN102069_c0_g1_i1.path2	1.96	2.22	0.96	0.21	0.17	0.19	10	14	5	1	1	1	0.124	-3.016	0.0135345	0.0357084	down	2D	355966783	355967104	+	TRINITY_DN102069_c0_g1_i1	--	--	--	--	--	--	--	--
TRINITY_DN102070_c0_g1_i1.path1	3.95	4.78	0.55	0	0.75	0.27	14	21	2	0	3	1	0.127	-2.98	0.0141073	0.0370077	down	7C	15963730	15964034	+	TRINITY_DN102070_c0_g1_i1	--	--	--	--	--	--	--	--
TRINITY_DN102073_c0_g1_i1.path1	6.38	6.4	4.53	1.26	1.2	2.43	33	41	24	6	7	13	0.317	-1.659	0.003808	0.0118594	down	6C	433832208	433832534	-	TRINITY_DN102073_c0_g1_i1	--	K04733 interleukin-1 receptor-associated kinase 4 [EC:2.7.11.1] | (RefSeq) wall-associated receptor kinase 3-like (A)	Wall-associated receptor kinase 5 [Triticum urartu]	RecName: Full=Putative wall-associated receptor kinase-like 16; EC=2.7.11.-; Flags: Precursor;	SubName: Full=Wall-associated receptor kinase 5 {ECO:0000313|EMBL:EMS62262.1, ECO:0000313|EnsemblPlants:TRIUR3_34330-P1};	Serine/threonine protein kinase	GO:0016021,integral component of membrane; GO:0005886,plasma membrane; GO:0005524,ATP binding; GO:0004674,protein serine/threonine kinase activity; GO:0007166,cell surface receptor signaling pathway	Protein kinase domain
TRINITY_DN102073_c0_g1_i1.path3	2.32	3.12	4.72	1.05	0	0.75	12	20	25	5	0	4	0.19	-2.395	0.00589812	0.0173878	down	6A	13699357	13699683	+	TRINITY_DN102073_c0_g1_i1	--	K04733 interleukin-1 receptor-associated kinase 4 [EC:2.7.11.1] | (RefSeq) wall-associated receptor kinase 3-like (A)	Wall-associated receptor kinase 5 [Triticum urartu]	RecName: Full=Putative wall-associated receptor kinase-like 16; EC=2.7.11.-; Flags: Precursor;	SubName: Full=Wall-associated receptor kinase 5 {ECO:0000313|EMBL:EMS62262.1, ECO:0000313|EnsemblPlants:TRIUR3_34330-P1};	Serine/threonine protein kinase	GO:0016021,integral component of membrane; GO:0005886,plasma membrane; GO:0005524,ATP binding; GO:0004674,protein serine/threonine kinase activity; GO:0007166,cell surface receptor signaling pathway	Protein kinase domain
TRINITY_DN102079_c0_g1_i1.path1	3.07	4.95	7.34	18.13	18.43	14.86	20	40	49	109	136	100	3.641	1.864	2.22726e-07	1.51331e-06	up	5C	136669465	136669876	-	TRINITY_DN102079_c0_g1_i1	--	K22382 WD repeat-containing protein 26 | (RefSeq) LOC109787003; WD repeat-containing protein 26-like (A)	WD repeat-containing protein 26 [Triticum urartu]	RecName: Full=WD repeat-containing protein 26 homolog {ECO:0000305}; Short=AtWDR26 {ECO:0000303|PubMed:26706055};	SubName: Full=Uncharacterized protein {ECO:0000313|EnsemblPlants:TRIAE_CS42_5BS_TGACv1_423712_AA1382250.1};	WD40 repeat-containing protein	GO:0005737,cytoplasm; GO:0009737,response to abscisic acid; GO:0009733,response to auxin; GO:0009723,response to ethylene; GO:0009416,response to light stimulus; GO:0006970,response to osmotic stress	--
TRINITY_DN10208_c0_g1_i1.path1	27.4	22.21	25.64	5.73	8.89	5.05	752	755	720	145	276	143	0.283	-1.819	1.74118e-13	2.3267e-12	down	6A	396298175	396301378	+	TRINITY_DN10208_c0_g1_i1	--	K22857 EEF1A lysine methyltransferase 4 [EC:2.1.1.-] | (RefSeq) EEF1A lysine methyltransferase 4 (A)	PREDICTED: methyltransferase-like protein 13 [Brachypodium distachyon]	RecName: Full=Probable thiol methyltransferase 2; EC=2.1.1.9; AltName: Full=Protein HARMLESS TO OZONE LAYER 3; Short=AtHOL3;	SubName: Full=Uncharacterized protein {ECO:0000313|EnsemblPlants:TRIAE_CS42_2BS_TGACv1_147278_AA0480950.1};	Predicted spermine/spermidine synthase	GO:0009507,chloroplast; GO:0009941,chloroplast envelope; GO:0018708,thiol S-methyltransferase activity	Methyltransferase domain
TRINITY_DN10208_c0_g1_i1.path2	23.3	19.34	24.15	3.26	5.05	3.15	644	662	683	83	158	90	0.187	-2.422	1.12751e-21	2.82636e-20	down	7C	678148678	678151892	+	TRINITY_DN10208_c0_g1_i1	--	K22857 EEF1A lysine methyltransferase 4 [EC:2.1.1.-] | (RefSeq) LOC109758059; methyltransferase-like protein 13 (A)	methyltransferase-like protein 13 [Aegilops tauschii subsp. tauschii]	RecName: Full=Probable thiol methyltransferase 2; EC=2.1.1.9; AltName: Full=Protein HARMLESS TO OZONE LAYER 3; Short=AtHOL3;	SubName: Full=Uncharacterized protein {ECO:0000313|EnsemblPlants:TRIAE_CS42_2BS_TGACv1_147278_AA0480950.1};	Predicted spermine/spermidine synthase	GO:0009507,chloroplast; GO:0009941,chloroplast envelope; GO:0018708,thiol S-methyltransferase activity	Methyltransferase domain
TRINITY_DN102080_c0_g1_i1.path1	7.8	5.7	4.36	0.2	0.99	0.18	42	38	24	1	6	1	0.086	-3.54	3.0449e-06	1.75327e-05	down	3A	356397258	356397597	+	TRINITY_DN102080_c0_g1_i1	--	K07198 5'-AMP-activated protein kinase, catalytic alpha subunit [EC:2.7.11.11] | (RefSeq) CBL-interacting protein kinase 5 (A)	predicted protein [Hordeum vulgare subsp. vulgare]	RecName: Full=CBL-interacting protein kinase 5; EC=2.7.11.1; AltName: Full=OsCIPK05;	SubName: Full=CIPK5 {ECO:0000313|EMBL:JAF49257.1};	Serine/threonine protein kinase	GO:0005829,cytosol; GO:0005524,ATP binding; GO:0004674,protein serine/threonine kinase activity; GO:0035556,intracellular signal transduction; GO:0018105,peptidyl-serine phosphorylation; GO:0018107,peptidyl-threonine phosphorylation	NAF domain
TRINITY_DN102080_c0_g1_i1.path2	6.5	4.95	5.08	0.6	0.16	0.72	35	33	28	3	1	4	0.098	-3.352	5.55959e-06	3.0814e-05	down	3D	20449329	20449668	+	TRINITY_DN102080_c0_g1_i1	--	K07198 5'-AMP-activated protein kinase, catalytic alpha subunit [EC:2.7.11.11] | (RefSeq) CBL-interacting protein kinase 5 (A)	predicted protein [Hordeum vulgare subsp. vulgare]	RecName: Full=CBL-interacting protein kinase 5; EC=2.7.11.1; AltName: Full=OsCIPK05;	SubName: Full=CIPK5 {ECO:0000313|EMBL:JAF49257.1};	Serine/threonine protein kinase	GO:0005829,cytosol; GO:0005524,ATP binding; GO:0004674,protein serine/threonine kinase activity; GO:0035556,intracellular signal transduction; GO:0018105,peptidyl-serine phosphorylation; GO:0018107,peptidyl-threonine phosphorylation	NAF domain
TRINITY_DN102084_c0_g1_i1.path1	0	0.6	0	5.38	2.19	2.64	0	3	0	20	10	11	17.262	4.11	0.000498053	0.00193626	up	4A	170185371	170185625	+	TRINITY_DN102084_c0_g1_i1	--	--	--	--	--	--	--	--
TRINITY_DN1021_c0_g2_i3.path1	7.99	8.6	9.89	308.83	258.51	437.63	90	120	114	3208	3297	5091	42.484	5.409	8.45104e-83	3.0504e-80	up	1C	83313862	83314692	+	TRINITY_DN1021_c0_g2_i3	--	--	hypothetical protein TRIUR3_34300 [Triticum urartu]	--	SubName: Full=Uncharacterized protein {ECO:0000313|EnsemblPlants:TRIAE_CS42_1AL_TGACv1_000743_AA0018220.1};	--	GO:0046872,metal ion binding; GO:0030001,metal ion transport	Heavy-metal-associated domain
TRINITY_DN102109_c0_g1_i1.path1	0	0.25	0	1.18	0.96	2.7	0	2	0	7	7	18	20.37	4.348	0.00173165	0.00593586	up	1A	280055963	280056370	-	TRINITY_DN102109_c0_g1_i1	--	--	--	--	--	--	--	--
TRINITY_DN102125_c0_g1_i1.path1	0	0	0	5.59	3.5	4.03	0	0	0	26	20	21	142.41	7.154	8.76285e-08	6.28159e-07	up	3C	524117544	524117862	+	TRINITY_DN102125_c0_g1_i1	--	--	uncharacterized protein LOC109758150 [Aegilops tauschii subsp. tauschii]	--	SubName: Full=Uncharacterized protein {ECO:0000313|EnsemblPlants:TRIAE_CS42_4DS_TGACv1_361827_AA1173300.1};	--	--	MuDR family transposase
TRINITY_DN102127_c0_g1_i1.path3	9.25	6.92	7.5	2.94	4.98	1.31	41	38	34	12	25	6	0.421	-1.248	0.0179239	0.0454339	down	1A	137137656	137138447	-	TRINITY_DN102127_c0_g1_i1	--	--	--	--	--	--	--	--
TRINITY_DN102133_c0_g1_i1.path1	0.22	0	0.21	0.78	1.14	0.77	3	0	3	10	18	11	7.065	2.821	0.00361034	0.0113214	up	1D	310053711	310054588	+	TRINITY_DN102133_c0_g1_i1	--	--	--	--	--	--	--	--
TRINITY_DN102137_c0_g1_i1.path1	41.68	30.21	31.61	5.94	3.58	4.13	411	369	319	54	40	42	0.144	-2.798	1.47847e-21	3.67743e-20	down	4A	399993933	399994719	+	TRINITY_DN102137_c0_g1_i1	--	--	--	--	--	--	--	--
TRINITY_DN102148_c0_g1_i1.path1	7.49	6.41	4.99	1.23	1.1	0.88	66	70	45	10	11	8	0.186	-2.426	2.54659e-07	1.71712e-06	down	7C	609799605	609800267	+	TRINITY_DN102148_c0_g1_i1	--	--	--	--	--	--	--	--
TRINITY_DN102149_c0_g1_i1.path1	1.71	1.21	0.42	11.62	12.49	19.29	8	7	2	50	66	93	14.637	3.872	2.28293e-12	2.72841e-11	up	6A	269208122	269208416	+	TRINITY_DN102149_c0_g1_i1	--	--	--	--	--	--	--	--
TRINITY_DN102149_c0_g1_i1.path2	1.09	0.88	0	4.74	4.83	8.47	5	5	0	20	25	40	10.298	3.364	8.50063e-06	4.57188e-05	up	6D	232258504	232258792	+	TRINITY_DN102149_c0_g1_i1	--	--	--	--	--	--	--	--
TRINITY_DN102151_c0_g1_i1.path1	2.35	3.41	2.52	16.31	18.26	13.65	10	18	11	64	88	60	6.346	2.666	1.37059e-10	1.36948e-09	up	6C	83837682	83837950	-	TRINITY_DN102151_c0_g1_i1	--	--	--	--	--	--	--	--
TRINITY_DN102158_c0_g1_i1.path2	1.85	5.23	3.92	0.33	0.27	0	6	21	13	1	1	0	0.059	-4.074	0.00211697	0.00708613	down	6A	293627406	293627610	-	TRINITY_DN102158_c0_g1_i1	--	--	--	--	--	--	--	--
TRINITY_DN10216_c1_g1_i5.path1	33.06	26.45	24.05	8.17	12.84	7.97	1326	1314	987	302	583	330	0.378	-1.403	2.91173e-09	2.51698e-08	down	3D	196171045	196174092	-	TRINITY_DN10216_c1_g1_i5	--	--	--	--	--	--	--	--
TRINITY_DN10216_c2_g1_i7.path3	0.17	0.19	0.24	1.13	0.7	1.32	9	12	13	54	41	71	5.812	2.539	2.30583e-07	1.56371e-06	up	7C	327201225	327205301	+	TRINITY_DN10216_c2_g1_i7	--	K22909 zinc finger CCCH domain-containing protein 13 | (RefSeq) zinc finger CCCH domain-containing protein 38 isoform X1 (A)	uncharacterized protein LOC109782176 isoform X3 [Aegilops tauschii subsp. tauschii]	RecName: Full=Zinc finger CCCH domain-containing protein 55; Short=OsC3H55;	SubName: Full=Uncharacterized protein {ECO:0000313|EnsemblPlants:TRIAE_CS42_3B_TGACv1_223995_AA0790660.1};	--	GO:0003677,DNA binding; GO:0046872,metal ion binding	--
TRINITY_DN102161_c0_g1_i1.path1	0.87	2.2	2.78	5.51	12.92	7.68	7	22	23	41	118	64	4.852	2.279	2.14518e-06	1.26509e-05	up	5C	130295893	130297703	-	TRINITY_DN102161_c0_g1_i1	--	--	--	--	--	--	--	--
TRINITY_DN102166_c0_g1_i1.path1	3.16	2.78	1.12	8.72	6.6	8.35	11	12	4	28	26	30	3.716	1.894	0.0010267	0.00371985	up	2C	511314198	511314417	-	TRINITY_DN102166_c0_g1_i1	--	--	--	--	--	--	--	--
TRINITY_DN102167_c0_g1_i1.path1	9.68	14.59	10.01	20.84	20.12	21.78	68	127	72	135	160	158	2.027	1.019	0.000281963	0.00115399	up	5A	466340865	466341782	+	TRINITY_DN102167_c0_g1_i1	--	K03124 transcription initiation factor TFIIB | (RefSeq) transcription initiation factor IIB (A)	uncharacterized protein A4U43_C04F8350 [Asparagus officinalis]	RecName: Full=Transcription initiation factor IIB; AltName: Full=General transcription factor TFIIB;	SubName: Full=Transcription initiation factor IIB {ECO:0000313|EMBL:EMT25381.1, ECO:0000313|EnsemblPlants:EMT25381};	Transcription initiation factor TFIIB	GO:0005634,nucleus; GO:0046872,metal ion binding; GO:0017025,TBP-class protein binding; GO:0070897,transcription preinitiation complex assembly; GO:0006355,regulation of transcription, DNA-templated	Transcription factor TFIIB repeat
TRINITY_DN102170_c0_g1_i1.path1	3.72	6.18	4.91	0.24	0.97	0.42	17	35	23	1	5	2	0.123	-3.021	0.000131467	0.000574243	down	5C	53903881	53904169	+	TRINITY_DN102170_c0_g1_i1	--	--	--	--	--	--	--	--
TRINITY_DN102172_c0_g1_i1.path2	4.73	4.77	2.31	1.65	1.19	0.82	28	35	14	9	8	5	0.338	-1.565	0.0125349	0.0334452	down	7D	486439855	486440228	+	TRINITY_DN102172_c0_g1_i1	--	--	--	--	--	--	--	--
TRINITY_DN102176_c0_g1_i1.path2	0.18	0	0	0.98	0.96	0.87	1	0	0	5	6	5	17.201	4.104	0.012978	0.0344533	up	4A	427742870	427743457	-	TRINITY_DN102176_c0_g1_i1	--	--	--	--	--	--	--	--
TRINITY_DN102181_c0_g1_i1.path1	2.03	1.09	1.76	0.16	0.53	0.22	27	18	24	2	8	3	0.206	-2.28	0.00181082	0.00616977	down	3C	423674493	423675332	+	TRINITY_DN102181_c0_g1_i1	--	--	--	--	--	--	--	--
TRINITY_DN102183_c0_g1_i1.path1	0	0.15	0	1.42	1.49	1.81	0	1	0	7	9	10	28.17	4.816	0.0013888	0.00487309	up	4D	222286460	222286797	-	TRINITY_DN102183_c0_g1_i1	--	--	--	--	--	--	--	--
TRINITY_DN102186_c0_g1_i1.path3	1.83	3.25	4.65	11.92	10.68	5.68	10	22	26	60	66	32	3.119	1.641	0.000465848	0.00182278	up	4C	480819261	480819605	-	TRINITY_DN102186_c0_g1_i1	--	--	Protein binding protein [Zea mays]	--	SubName: Full=Protein binding protein {ECO:0000313|EMBL:ONM08412.1};	--	GO:0016021,integral component of membrane	--
TRINITY_DN102193_c0_g1_i1.path2	3.16	3.19	2.01	0.34	0.56	1.07	20	25	13	2	4	7	0.267	-1.906	0.0110217	0.029973	down	5D	67276063	67276462	-	TRINITY_DN102193_c0_g1_i1	--	--	--	--	--	--	--	--
TRINITY_DN102196_c0_g1_i1.path2	11.72	12.02	16.09	53.43	51.07	37.27	74	94	104	311	365	243	3.865	1.95	8.23905e-14	1.13534e-12	up	4A	316162239	316162637	-	TRINITY_DN102196_c0_g1_i1	--	--	--	--	--	--	--	--
TRINITY_DN102199_c0_g1_i1.path1	0.66	0.4	0.16	1.07	3.06	1.12	4	3	1	6	21	7	4.71	2.236	0.0199562	0.0496891	up	4C	160461224	160461606	+	TRINITY_DN102199_c0_g1_i1	--	--	--	--	--	--	--	--
TRINITY_DN10220_c0_g1_i1.path1	2.64	4.26	2.71	11.75	14.97	10.9	19	38	20	78	122	81	4.28	2.098	4.21239e-09	3.57364e-08	up	6C	523858985	523859611	+	TRINITY_DN10220_c0_g1_i1	--	--	PREDICTED: phosphate transporter PHO1-2 isoform X2 [Brachypodium distachyon]	RecName: Full=Phosphate transporter PHO1-2; AltName: Full=Protein PHO1-2; Short=OsPHO1;2;	SubName: Full=Uncharacterized protein {ECO:0000313|EnsemblPlants:HORVU6Hr1G089130.27};	Predicted small molecule transporter	GO:0016021,integral component of membrane; GO:0005886,plasma membrane; GO:0005802,trans-Golgi network; GO:0000822,inositol hexakisphosphate binding; GO:0015114,phosphate ion transmembrane transporter activity; GO:0016036,cellular response to phosphate starvation; GO:0048016,inositol phosphate-mediated signaling; GO:0006817,phosphate ion transport; GO:0006799,polyphosphate biosynthetic process	EXS family
TRINITY_DN102200_c0_g1_i1.path1	10.01	1.15	1.12	0	0	0.28	35	5	4	0	0	1	0.027	-5.222	0.000757141	0.00282725	down	2C	572798373	572798682	-	TRINITY_DN102200_c0_g1_i1	--	--	--	--	--	--	--	--
TRINITY_DN10221_c0_g1_i1.path1	22.87	19.88	17.67	90.52	61.79	106.79	105	113	83	383	321	506	4.797	2.262	1.76329e-14	2.58064e-13	up	1D	304271672	304271961	+	TRINITY_DN10221_c0_g1_i1	--	--	PREDICTED: uncharacterized protein LOC100843646 [Brachypodium distachyon]	--	SubName: Full=Uncharacterized protein {ECO:0000313|EMBL:KQK06567.1, ECO:0000313|EnsemblPlants:BRADI2G27020.1};	--	GO:0005516,calmodulin binding	--
TRINITY_DN102213_c0_g1_i1.path1	0	0	0	5.23	8.76	5.21	0	0	0	17	35	19	145.04	7.18	7.66302e-08	5.53235e-07	up	3A	207942141	207942363	+	TRINITY_DN102213_c0_g1_i1	--	--	--	--	--	--	--	--
TRINITY_DN102213_c0_g1_i1.path2	0	0	0	1.76	1.43	1.31	0	0	0	6	6	5	35.729	5.159	0.00216548	0.00722926	up	3D	173240489	173240722	-	TRINITY_DN102213_c0_g1_i1	--	--	--	--	--	--	--	--
TRINITY_DN102213_c0_g1_i1.path3	0.27	0	0	6.74	1.67	7.59	1	0	0	23	7	29	67.116	6.069	1.44597e-05	7.50338e-05	up	5A	281445081	281445314	-	TRINITY_DN102213_c0_g1_i1	--	--	--	--	--	--	--	--
TRINITY_DN102225_c0_g1_i1.path1	6.72	7.48	9.4	3.15	3.53	1.76	37	51	53	16	22	10	0.387	-1.37	0.00300249	0.00963861	down	2C	73504533	73504880	-	TRINITY_DN102225_c0_g1_i1	--	--	--	--	--	--	--	--
TRINITY_DN102233_c0_g1_i1.path2	0.31	2.71	1.19	0	0	0	1	11	4	0	0	0	0.043	-4.523	0.0174601	0.0444352	down	7C	152157412	152157618	-	TRINITY_DN102233_c0_g1_i1	--	--	--	--	--	--	--	--
TRINITY_DN102240_c1_g1_i1.path1	0.79	3.4	0.51	5.14	5.12	4.59	3	16	2	18	22	18	3.461	1.791	0.0141076	0.0370077	up	7A	491949508	491949747	+	TRINITY_DN102240_c1_g1_i1	--	--	--	--	--	--	--	--
TRINITY_DN102287_c0_g1_i1.path1	23.69	14.35	12.95	0.61	0	1.91	84	63	47	2	0	7	0.055	-4.184	1.12436e-09	1.01903e-08	down	4C	527262000	527262223	-	TRINITY_DN102287_c0_g1_i1	--	--	--	--	--	--	--	--
TRINITY_DN102289_c0_g1_i1.path1	3.81	9.67	8.52	39.29	18.05	54.61	14	44	32	133	75	207	5.75	2.524	4.05866e-08	3.0444e-07	up	7C	179477038	179477269	-	TRINITY_DN102289_c0_g1_i1	--	--	--	--	--	--	--	--
TRINITY_DN10230_c0_g1_i5.path1	1.66	2.25	2.31	10.42	9.83	10.87	35	59	50	203	235	237	5.514	2.463	4.27159e-18	8.36752e-17	up	5D	185778629	185782295	+	TRINITY_DN10230_c0_g1_i5	--	K11827 AP-2 complex subunit sigma-1 | (RefSeq) AP-2 complex subunit sigma (A)	PREDICTED: AP-2 complex subunit sigma [Fragaria vesca subsp. vesca]	RecName: Full=AP-2 complex subunit sigma; AltName: Full=Clathrin assembly protein 2 sigma small chain; AltName: Full=Clathrin coat assembly protein AP17; AltName: Full=Clathrin coat-associated protein AP17; AltName: Full=Plasma membrane adaptor AP-2 17 kDa protein; AltName: Full=Sigma2-adaptin;	RecName: Full=AP complex subunit sigma {ECO:0000256|PIRNR:PIRNR015588};	Clathrin adaptor complex, small subunit	GO:0005905,clathrin-coated pit; GO:0005886,plasma membrane; GO:0008565,protein transporter activity; GO:0006897,endocytosis	Clathrin adaptor complex small chain
TRINITY_DN10230_c0_g1_i5.path2	1.51	1.91	2.31	11.19	10.83	12.52	32	50	50	218	259	273	6.648	2.733	1.31086e-20	3.06488e-19	up	5A	201820055	201823726	+	TRINITY_DN10230_c0_g1_i5	--	K11827 AP-2 complex subunit sigma-1 | (RefSeq) AP-2 complex subunit sigma (A)	PREDICTED: AP-2 complex subunit sigma [Fragaria vesca subsp. vesca]	RecName: Full=AP-2 complex subunit sigma; AltName: Full=Clathrin assembly protein 2 sigma small chain; AltName: Full=Clathrin coat assembly protein AP17; AltName: Full=Clathrin coat-associated protein AP17; AltName: Full=Plasma membrane adaptor AP-2 17 kDa protein; AltName: Full=Sigma2-adaptin;	RecName: Full=AP complex subunit sigma {ECO:0000256|PIRNR:PIRNR015588};	Clathrin adaptor complex, small subunit	GO:0005905,clathrin-coated pit; GO:0005886,plasma membrane; GO:0008565,protein transporter activity; GO:0006897,endocytosis	Clathrin adaptor complex small chain
TRINITY_DN10230_c1_g2_i3.path1	10.36	9.54	6.75	3.75	3.94	3.02	93	106	62	31	40	28	0.441	-1.181	0.000715592	0.00268697	down	4C	73791676	73795030	-	TRINITY_DN10230_c1_g2_i3	--	--	--	--	--	--	--	--
TRINITY_DN102300_c0_g1_i1.path1	12.22	15.32	8.38	1.97	3.45	1.26	47	73	33	7	15	5	0.205	-2.289	1.27657e-05	6.68581e-05	down	3A	389246519	389246761	+	TRINITY_DN102300_c0_g1_i1	--	--	--	--	--	--	--	--
TRINITY_DN102317_c0_g1_i1.path1	2.17	3.36	1.95	0	0.29	0.16	13	25	12	0	2	1	0.07	-3.83	0.000606475	0.00231306	down	1D	247562098	247562476	+	TRINITY_DN102317_c0_g1_i1	--	--	uncharacterized protein LOC109752551 [Aegilops tauschii subsp. tauschii]	--	SubName: Full=Uncharacterized protein {ECO:0000313|EnsemblPlants:TRIAE_CS42_1BL_TGACv1_033455_AA0139580.1};	--	--	--
TRINITY_DN102343_c0_g1_i1.path2	7.32	13.31	12.23	2.65	4.32	1.48	24	54	41	8	16	5	0.28	-1.839	0.000892546	0.00327935	down	3A	11772699	11772905	+	TRINITY_DN102343_c0_g1_i1	--	--	--	--	--	--	--	--
TRINITY_DN102354_c0_g1_i1.path1	2.92	1.46	1.09	0	0	0.27	21	13	8	0	0	2	0.056	-4.161	0.00159525	0.00551481	down	6C	575063424	575065806	+	TRINITY_DN102354_c0_g1_i1	--	--	hypothetical protein TRIUR3_35199 [Triticum urartu]	--	SubName: Full=Uncharacterized protein {ECO:0000313|EMBL:EMS56314.1, ECO:0000313|EnsemblPlants:TRIUR3_35199-P1};	--	--	--
TRINITY_DN102356_c0_g1_i1.path1	0.45	1	0.99	5.4	1.7	3.61	4	11	9	44	17	33	4.795	2.262	0.000296014	0.00120582	up	1A	120152385	120152943	-	TRINITY_DN102356_c0_g1_i1	--	--	--	--	--	--	--	--
TRINITY_DN10236_c0_g1_i1.path1	18.46	18.47	11.24	54.18	57.47	57.6	159	197	99	430	560	512	3.897	1.962	1.28383e-15	2.06738e-14	up	6C	606759801	606760790	+	TRINITY_DN10236_c0_g1_i1	--	--	--	--	--	--	--	--
TRINITY_DN102364_c0_g1_i1.path1	3.07	3.72	1.97	0.21	0.42	0.09	32	48	21	2	5	1	0.092	-3.442	4.23804e-06	2.39221e-05	down	3A	400794809	400795466	+	TRINITY_DN102364_c0_g1_i1	--	--	hypothetical protein PAHAL_G01830 [Panicum hallii]	--	SubName: Full=Uncharacterized protein {ECO:0000313|EMBL:KQK88724.1, ECO:0000313|EnsemblPlants:Si038087m};	--	--	--
TRINITY_DN102364_c0_g1_i1.path2	6.28	3.82	4.44	0.42	0.17	0	65	49	47	4	2	0	0.042	-4.561	1.55339e-09	1.38496e-08	down	1C	442487455	442488108	-	TRINITY_DN102364_c0_g1_i1	--	--	hypothetical protein SETIT_038087mg [Setaria italica]	--	SubName: Full=Uncharacterized protein {ECO:0000313|EMBL:KQK88724.1, ECO:0000313|EnsemblPlants:Si038087m};	--	--	--
TRINITY_DN102368_c0_g1_i1.path1	21.24	23.12	25.09	111.23	87.33	140.84	115	155	139	555	535	787	5.45	2.446	8.11014e-19	1.66723e-17	up	6C	137997923	137998264	+	TRINITY_DN102368_c0_g1_i1	--	K03549 KUP system potassium uptake protein | (RefSeq) potassium transporter 24-like (A)	Potassium transporter 8 [Zea mays]	RecName: Full=Potassium transporter 24; AltName: Full=OsHAK24;	RecName: Full=Potassium transporter {ECO:0000256|RuleBase:RU321113};	--	GO:0016021,integral component of membrane; GO:0005886,plasma membrane; GO:0015079,potassium ion transmembrane transporter activity	--
TRINITY_DN102374_c0_g1_i1.path1	47.34	51.59	47.15	16.39	16.89	21.17	260	351	265	83	105	120	0.414	-1.273	8.11271e-07	5.09506e-06	down	7C	139817377	139817723	-	TRINITY_DN102374_c0_g1_i1	--	--	--	--	--	--	--	--
TRINITY_DN102375_c0_g1_i1.path1	0	0	0	1.47	2.19	1.31	0	0	0	6	11	6	47.124	5.558	0.000443146	0.00174215	up	7A	402989041	402989320	+	TRINITY_DN102375_c0_g1_i1	--	K23618 acyl-activating enzyme 11/12 [EC:6.2.1.2 6.2.1.-] | (RefSeq) butyrate--CoA ligase AAE11, peroxisomal-like (A)	2-succinylbenzoate--CoA ligase [Triticum urartu]	RecName: Full=Probable acyl-activating enzyme 4; EC=6.2.1.-; AltName: Full=AMP-binding protein 4; Short=AtAMPBP4;	SubName: Full=Uncharacterized protein {ECO:0000313|EnsemblPlants:HORVU2Hr1G120190.4};	Acyl-CoA synthetase	GO:0016874,ligase activity; GO:0006631,fatty acid metabolic process	AMP-binding enzyme
TRINITY_DN102380_c0_g1_i1.path1	1.24	0.17	1.01	5.62	4.03	3.01	6	1	5	25	22	15	5.755	2.525	0.00079954	0.00296962	up	7C	235844142	235844446	+	TRINITY_DN102380_c0_g1_i1	--	--	--	--	--	--	--	--
TRINITY_DN102392_c0_g1_i1.path1	0.41	1.21	0.93	6.65	4.57	9.89	3	11	7	45	38	75	9.233	3.207	1.77853e-08	1.39545e-07	up	4C	6715614	6716077	-	TRINITY_DN102392_c0_g1_i1	--	--	predicted protein [Hordeum vulgare subsp. vulgare]	--	SubName: Full=Uncharacterized protein {ECO:0000313|EnsemblPlants:TRIAE_CS42_4AL_TGACv1_288877_AA0960360.1};	--	--	Importin-beta N-terminal domain
TRINITY_DN1024_c0_g1_i5.path1	7.14	6.34	6.69	14.68	12.58	13.6	142	156	136	269	283	279	2.23	1.157	1.33238e-06	8.10806e-06	up	4C	459934324	459941404	-	TRINITY_DN1024_c0_g1_i5	--	K08496 golgi SNAP receptor complex member 2 | (RefSeq) membrin-11 (A)	membrin-11 [Sorghum bicolor]	RecName: Full=Membrin-11; Short=AtMEMB11; AltName: Full=27 kDa Golgi SNARE protein; AltName: Full=Golgi SNAP receptor complex member 2-1;	RecName: Full=Membrin {ECO:0000256|PIRNR:PIRNR028865};	Golgi SNAP receptor complex member	GO:0005829,cytosol; GO:0005789,endoplasmic reticulum membrane; GO:0012507,ER to Golgi transport vesicle membrane; GO:0005794,Golgi apparatus; GO:0000139,Golgi membrane; GO:0016021,integral component of membrane; GO:0031902,late endosome membrane; GO:0031201,SNARE complex; GO:0005484,SNAP receptor activity; GO:0000149,SNARE binding; GO:0006888,ER to Golgi vesicle-mediated transport; GO:0006896,Gol…	Snare region anchored in the vesicle membrane C-terminus
TRINITY_DN10240_c0_g1_i12.path2	1.17	1.47	0.63	0.28	0.04	0.16	49	76	27	11	2	7	0.164	-2.612	1.82089e-05	9.27833e-05	down	3A	157548288	157551831	-	TRINITY_DN10240_c0_g1_i12	--	--	--	--	--	--	--	--
TRINITY_DN102402_c0_g1_i1.path1	1.72	1.49	1.16	0	0	0	13	14	9	0	0	0	0.018	-5.802	8.7892e-05	0.000396692	down	4C	483352516	483352993	-	TRINITY_DN102402_c0_g1_i1	--	--	--	--	--	--	--	--
TRINITY_DN10241_c0_g2_i1.path1	1.17	1.22	1.14	0.26	0.6	0.09	24	31	24	5	14	2	0.295	-1.76	0.00760587	0.0217109	down	1A	291316497	291317791	+	TRINITY_DN10241_c0_g2_i1	--	--	--	--	--	--	--	--
TRINITY_DN102416_c0_g1_i1.path1	2.62	8.77	6.29	17.24	15.82	29.24	13	54	32	79	89	150	3.972	1.99	7.07042e-06	3.85274e-05	up	7A	352993769	352995984	+	TRINITY_DN102416_c0_g1_i1	--	K13456 RPM1-interacting protein 4 | (RefSeq) RPM1-interacting protein 4 (A)	PREDICTED: RPM1-interacting protein 4 [Brachypodium distachyon]	RecName: Full=RPM1-interacting protein 4;	SubName: Full=Uncharacterized protein {ECO:0000313|EMBL:KQJ99083.1, ECO:0000313|EnsemblPlants:BRADI3G40950.1};	--	GO:0012505,endomembrane system; GO:0019897,extrinsic component of plasma membrane; GO:0016020,membrane; GO:0005886,plasma membrane; GO:0010204,defense response signaling pathway, resistance gene-independent; GO:0009816,defense response to bacterium, incompatible interaction; GO:0034051,negative regulation of plant-type hypersensitive response; GO:0009626,plant-type hypersensitive response; GO:000…	Cleavage site for pathogenic type III effector avirulence factor Avr
TRINITY_DN10243_c0_g1_i6.path1	0.11	0.49	0.17	323.4	438.5	317.78	3	17	5	8375	13942	9216	1479.07	10.53	3.18586e-178	1.7452e-174	up	5A	12965551	12968316	-	TRINITY_DN10243_c0_g1_i6	--	K00826 branched-chain amino acid aminotransferase [EC:2.6.1.42] | (RefSeq) branched-chain-amino-acid aminotransferase 3, chloroplastic (A)	PREDICTED: branched-chain-amino-acid aminotransferase 2, chloroplastic isoform X1 [Brachypodium distachyon]	RecName: Full=Branched-chain-amino-acid aminotransferase 3, chloroplastic {ECO:0000303|PubMed:12068099}; Short=Atbcat-3; EC=2.6.1.42; EC=2.6.1.88; Flags: Precursor;	RecName: Full=Branched-chain-amino-acid aminotransferase {ECO:0000256|RuleBase:RU004517}; EC=2.6.1.42 {ECO:0000256|RuleBase:RU004517};	Branched chain aminotransferase BCAT1, pyridoxal phosphate enzymes type IV superfamily	GO:0009507,chloroplast; GO:0009570,chloroplast stroma; GO:0052656,L-isoleucine transaminase activity; GO:0052654,L-leucine transaminase activity; GO:0052655,L-valine transaminase activity; GO:0009097,isoleucine biosynthetic process; GO:0009098,leucine biosynthetic process; GO:0009099,valine biosynthetic process	Amino-transferase class IV
TRINITY_DN102435_c0_g1_i1.path1	0.15	0.48	1.3	3.06	2.1	3.74	1	4	9	19	16	26	5.093	2.349	0.00208834	0.00700211	up	3D	373330833	373331258	+	TRINITY_DN102435_c0_g1_i1	--	K13457 disease resistance protein RPM1 | (RefSeq) disease resistance protein RPM1-like (A)	unnamed protein product [Triticum aestivum]	RecName: Full=Disease resistance protein RPM1; AltName: Full=Resistance to Pseudomonas syringae protein 3;	SubName: Full=Uncharacterized protein {ECO:0000313|EnsemblPlants:TRIUR3_20535-P1};	Apoptotic ATPase	GO:0012505,endomembrane system; GO:0019897,extrinsic component of plasma membrane; GO:0005886,plasma membrane; GO:0043531,ADP binding; GO:0005524,ATP binding; GO:0000166,nucleotide binding; GO:0009626,plant-type hypersensitive response; GO:0007165,signal transduction	Leucine Rich repeats (2 copies)
TRINITY_DN102435_c0_g1_i1.path2	0.15	0.12	0.43	1.92	1.17	3	1	1	3	12	9	21	9.912	3.309	0.00083739	0.00309735	up	3C	607091334	607091761	+	TRINITY_DN102435_c0_g1_i1	--	K13457 disease resistance protein RPM1 | (RefSeq) disease resistance protein RPM1-like (A)	hypothetical protein BRADI_4g14697v3 [Brachypodium distachyon]	RecName: Full=Disease resistance protein RPM1; AltName: Full=Resistance to Pseudomonas syringae protein 3;	SubName: Full=Uncharacterized protein {ECO:0000313|EnsemblPlants:TRIAE_CS42_U_TGACv1_641487_AA2096200.1};	Apoptotic ATPase	GO:0012505,endomembrane system; GO:0019897,extrinsic component of plasma membrane; GO:0005886,plasma membrane; GO:0043531,ADP binding; GO:0005524,ATP binding; GO:0000166,nucleotide binding; GO:0009626,plant-type hypersensitive response; GO:0007165,signal transduction	Leucine rich repeat
TRINITY_DN102439_c0_g1_i1.path1	18.75	22.9	26.57	59.77	48.06	43.72	160	242	232	470	464	385	2.423	1.277	1.02928e-07	7.30741e-07	up	7A	450750330	450750868	-	TRINITY_DN102439_c0_g1_i1	--	--	--	--	--	--	--	--
TRINITY_DN10244_c0_g1_i2.path1	0.06	0	0.12	6.51	11.68	8.12	1	0	2	98	216	137	170.118	7.41	1.25149e-16	2.18904e-15	up	3C	583823774	583824805	+	TRINITY_DN10244_c0_g1_i2	--	K19038 E3 ubiquitin-protein ligase ATL41 [EC:2.3.2.27] | (RefSeq) RING-H2 finger protein ATL44-like (A)	unnamed protein product [Triticum aestivum]	RecName: Full=E3 ubiquitin-protein ligase ATL59; EC=2.3.2.27 {ECO:0000269|PubMed:15644464, ECO:0000269|PubMed:16339806}; AltName: Full=RING-H2 finger protein ATL59; AltName: Full=RING-type E3 ubiquitin transferase ATL59 {ECO:0000305};	SubName: Full=Uncharacterized protein {ECO:0000313|EnsemblPlants:HORVU3Hr1G087720.1};	FOG: Predicted E3 ubiquitin ligase	GO:0016021,integral component of membrane; GO:0046872,metal ion binding; GO:0004842,ubiquitin-protein transferase activity; GO:0016567,protein ubiquitination	Ring finger domain
TRINITY_DN102440_c0_g1_i1.path1	94.67	89.3	74.98	22.85	32.36	19.16	517	604	419	115	200	108	0.313	-1.674	2.12564e-12	2.54926e-11	down	5C	16024242	16024756	+	TRINITY_DN102440_c0_g1_i1	--	--	uncharacterized protein LOC101786854 [Setaria italica]	--	SubName: Full=Uncharacterized protein {ECO:0000313|EMBL:JAF23682.1};	--	--	Protein of unknown function (DUF1997)
TRINITY_DN102446_c0_g1_i1.path1	53.46	50.22	56.23	5.91	5.67	7.91	275	320	296	28	33	42	0.135	-2.894	1.67407e-22	4.42515e-21	down	Chr00	73196676	73197854	-	TRINITY_DN102446_c0_g1_i1	--	K04733 interleukin-1 receptor-associated kinase 4 [EC:2.7.11.1] | (RefSeq) LOC109754232; putative disease resistance RPP13-like protein 1 (A)	Putative disease resistance protein RGA4 [Triticum urartu]	RecName: Full=Putative disease resistance RPP13-like protein 1;	SubName: Full=Uncharacterized protein {ECO:0000313|EnsemblPlants:TRIAE_CS42_1BS_TGACv1_049695_AA0159850.1};	Apoptotic ATPase	GO:0005886,plasma membrane; GO:0043531,ADP binding; GO:0005524,ATP binding; GO:0009626,plant-type hypersensitive response; GO:0007165,signal transduction	NB-ARC domain
TRINITY_DN102448_c0_g1_i1.path1	0.8	0.78	0.31	17.4	32.59	31.84	5	6	2	100	230	205	47.89	5.582	5.45083e-26	1.79855e-24	up	6C	594070907	594071300	+	TRINITY_DN102448_c0_g1_i1	--	--	--	--	--	--	--	--
TRINITY_DN10246_c0_g1_i1.path1	9.54	11.74	9.63	16.29	24.46	19.85	61	93	63	96	177	131	2.16	1.111	0.00013952	0.000606802	up	2D	29968280	29969150	-	TRINITY_DN10246_c0_g1_i1	--	K23490 cytochrome b5 | (RefSeq) metal-nicotianamine transporter YSL3-like (A)	hypothetical protein BRADI_5g08260v3 [Brachypodium distachyon]	RecName: Full=Probable metal-nicotianamine transporter YSL6; AltName: Full=Protein YELLOW STRIPE LIKE 6; Short=OsYSL6;	SubName: Full=Uncharacterized protein {ECO:0000313|EMBL:KQJ82293.1};	--	GO:0016021,integral component of membrane; GO:0005774,vacuolar membrane; GO:0022857,transmembrane transporter activity	OPT oligopeptide transporter protein
TRINITY_DN102487_c0_g1_i1.path1	3.29	4.38	4.55	9.04	10.27	11.64	17	28	24	43	60	62	2.802	1.487	0.000263011	0.00108342	up	6A	38559199	38559524	-	TRINITY_DN102487_c0_g1_i1	--	--	--	--	--	--	--	--
TRINITY_DN10249_c0_g1_i1.path2	3.38	4.02	3.06	1.34	1.6	0.78	282	415	261	103	151	67	0.386	-1.373	2.51367e-07	1.69615e-06	down	7C	693303197	693314657	+	TRINITY_DN10249_c0_g1_i1	--	K15710 E3 ubiquitin-protein ligase SHPRH [EC:3.6.4.- 2.3.2.27] | (RefSeq) LOC109771850; E3 ubiquitin-protein ligase SHPRH isoform X1 (A)	E3 ubiquitin-protein ligase SHPRH isoform X1 [Aegilops tauschii subsp. tauschii]	RecName: Full=DNA repair protein RAD5A {ECO:0000305}; EC=3.6.4.- {ECO:0000305}; AltName: Full=Putative SWI/SNF-related matrix-associated actin-dependent regulator of chromatin subfamily A member 3-like 2 {ECO:0000305}; Short=SMARCA3-like protein 2 {ECO:0000305}; AltName: Full=RAD5 homolog A {ECO:0000303|PubMed:18310306}; Short=AtRAD5a {ECO:0000303|PubMed:18310306};	SubName: Full=Uncharacterized protein {ECO:0000313|EnsemblPlants:TRIAE_CS42_2DS_TGACv1_179236_AA0605520.1};	DEAD box-containing helicase-like transcription factor/DNA repair protein	GO:0005634,nucleus; GO:0005524,ATP binding; GO:0004386,helicase activity; GO:0003676,nucleic acid binding; GO:0008270,zinc ion binding; GO:0016569,covalent chromatin modification; GO:0009294,DNA mediated transformation; GO:0000724,double-strand break repair via homologous recombination; GO:0045003,double-strand break repair via synthesis-dependent strand annealing	SNF2 family N-terminal domain
TRINITY_DN10249_c0_g1_i1.path3	1.89	2.33	1.95	0.63	0.64	0.37	157	240	166	48	60	32	0.289	-1.792	6.82076e-10	6.32274e-09	down	5D	457928623	457940798	+	TRINITY_DN10249_c0_g1_i1	--	K15710 E3 ubiquitin-protein ligase SHPRH [EC:3.6.4.- 2.3.2.27] | (RefSeq) LOC109771850; E3 ubiquitin-protein ligase SHPRH isoform X1 (A)	E3 ubiquitin-protein ligase SHPRH isoform X1 [Aegilops tauschii subsp. tauschii]	RecName: Full=DNA repair protein RAD5A {ECO:0000305}; EC=3.6.4.- {ECO:0000305}; AltName: Full=Putative SWI/SNF-related matrix-associated actin-dependent regulator of chromatin subfamily A member 3-like 2 {ECO:0000305}; Short=SMARCA3-like protein 2 {ECO:0000305}; AltName: Full=RAD5 homolog A {ECO:0000303|PubMed:18310306}; Short=AtRAD5a {ECO:0000303|PubMed:18310306};	SubName: Full=Uncharacterized protein {ECO:0000313|EnsemblPlants:TRIAE_CS42_2DS_TGACv1_179236_AA0605520.1};	DEAD box-containing helicase-like transcription factor/DNA repair protein	GO:0005634,nucleus; GO:0005524,ATP binding; GO:0004386,helicase activity; GO:0003676,nucleic acid binding; GO:0008270,zinc ion binding; GO:0016569,covalent chromatin modification; GO:0009294,DNA mediated transformation; GO:0000724,double-strand break repair via homologous recombination; GO:0045003,double-strand break repair via synthesis-dependent strand annealing	SNF2 family N-terminal domain
TRINITY_DN102493_c0_g1_i1.path1	0.28	0.22	0	2.41	1.47	1.34	1	1	0	8	6	5	11.32	3.501	0.0161567	0.0416219	up	4C	547617836	547618063	-	TRINITY_DN102493_c0_g1_i1	--	--	--	--	--	--	--	--
TRINITY_DN102510_c0_g1_i1.path1	0	0	0	0.44	0.45	0.2	0	0	0	4	5	2	22.585	4.497	0.0194041	0.0485155	up	3D	125099752	125100374	+	TRINITY_DN102510_c0_g1_i1	--	--	--	--	--	--	--	--
TRINITY_DN102512_c0_g1_i1.path1	0.31	0.49	0	1.16	1.89	1.48	2	4	0	7	14	10	6.188	2.63	0.010967	0.0298435	up	2C	400830258	400830670	-	TRINITY_DN102512_c0_g1_i1	--	--	--	--	--	--	--	--
TRINITY_DN102522_c0_g1_i1.path1	4.77	8.75	3.95	12.15	12.66	13.34	26	59	22	61	78	75	2.422	1.276	0.000869242	0.0032013	up	3C	610825393	610825736	+	TRINITY_DN102522_c0_g1_i1	--	--	--	--	--	--	--	--
TRINITY_DN102524_c0_g1_i1.path2	8.15	11.23	11.46	38.15	49.33	36.95	41	70	59	177	281	192	4.414	2.142	1.25353e-14	1.85737e-13	up	7A	445894374	445894691	-	TRINITY_DN102524_c0_g1_i1	--	K00627 pyruvate dehydrogenase E2 component (dihydrolipoamide acetyltransferase) [EC:2.3.1.12] | (RefSeq) LOC109766151; dihydrolipoyllysine-residue acetyltransferase component 2 of pyruvate dehydrogenase complex, mitochondrial-like isoform X1 (A)	predicted protein [Hordeum vulgare subsp. vulgare]	--	SubName: Full=Uncharacterized protein {ECO:0000313|EnsemblPlants:HORVU7Hr1G001330.3};	--	GO:0016746,transferase activity, transferring acyl groups; GO:0008152,metabolic process	2-oxoacid dehydrogenases acyltransferase (catalytic domain)
TRINITY_DN10254_c0_g1_i1.path1	3.79	2.47	3.06	1.63	1.68	0.71	114	92	94	45	57	22	0.462	-1.114	0.00280509	0.00908486	down	4D	13050791	13053025	+	TRINITY_DN10254_c0_g1_i1	--	K01426 amidase [EC:3.5.1.4] | (RefSeq) LOC109752462; putative amidase C869.01 (A)	putative amidase C869.01 [Aegilops tauschii subsp. tauschii]	RecName: Full=Probable amidase At4g34880 {ECO:0000305}; EC=3.5.1.4 {ECO:0000250|UniProtKB:Q9FR37};	SubName: Full=Uncharacterized protein {ECO:0000313|EnsemblPlants:TRIUR3_22260-P1};	Amidases	GO:0004040,amidase activity	Amidase
TRINITY_DN102544_c0_g1_i1.path1	4.56	4.66	5.64	0.66	1.61	0.29	15	19	19	2	6	1	0.189	-2.405	0.0038137	0.011874	down	5C	509205843	509206050	-	TRINITY_DN102544_c0_g1_i1	--	--	--	--	--	--	--	--
TRINITY_DN102547_c0_g1_i1.path1	56.73	42.23	29.34	5.2	9.11	4.28	308	284	163	26	56	24	0.159	-2.657	1.51516e-14	2.23125e-13	down	1C	136797654	136797996	-	TRINITY_DN102547_c0_g1_i1	--	--	--	--	--	--	--	--
TRINITY_DN10255_c0_g1_i1.path2	25.09	29.15	19.73	62.24	46.23	61.8	164	236	132	375	342	417	2.562	1.357	1.12956e-07	7.98042e-07	up	7D	70905627	70906279	+	TRINITY_DN10255_c0_g1_i1	--	K00521 ferric-chelate reductase [EC:1.16.1.7] | (RefSeq) ferric reduction oxidase 7, chloroplastic-like (A)	PREDICTED: NAC domain-containing protein 53-like [Brachypodium distachyon]	RecName: Full=NAC domain-containing protein 78 {ECO:0000303|PubMed:15029955}; Short=ANAC078 {ECO:0000303|PubMed:15029955}; AltName: Full=Protein NTM1-like 11 {ECO:0000303|PubMed:17158162};	SubName: Full=Uncharacterized protein {ECO:0000313|EMBL:KQJ94670.1, ECO:0000313|EnsemblPlants:BRADI3G12470.1};	--	GO:0005737,cytoplasm; GO:0016021,integral component of membrane; GO:0005634,nucleus; GO:0003677,DNA binding; GO:0003700,DNA-binding transcription factor activity; GO:0045893,positive regulation of transcription, DNA-templated; GO:0009962,regulation of flavonoid biosynthetic process; GO:0009644,response to high light intensity; GO:0006351,transcription, DNA-templated	No apical meristem (NAM) protein
TRINITY_DN102553_c0_g1_i1.path1	0	0	0	0.56	1.36	1.24	0	0	0	2	6	5	26.831	4.746	0.00988832	0.0272941	up	1C	427986465	427986710	+	TRINITY_DN102553_c0_g1_i1	--	K04733 interleukin-1 receptor-associated kinase 4 [EC:2.7.11.1] | (RefSeq) LEAF RUST 10 DISEASE-RESISTANCE LOCUS RECEPTOR-LIKE PROTEIN KINASE-like 2.4 isoform X1 (A)	LEAF RUST 10 DISEASE-RESISTANCE LOCUS RECEPTOR-LIKE PROTEIN KINASE-like 2.5 [Aegilops tauschii subsp. tauschii]	RecName: Full=LEAF RUST 10 DISEASE-RESISTANCE LOCUS RECEPTOR-LIKE PROTEIN KINASE-like 2.1 {ECO:0000303|PubMed:12805585}; EC=2.7.11.1; AltName: Full=Probable receptor-like serine/threonine-protein kinase LRK10L-2.1 {ECO:0000305}; Flags: Precursor;	SubName: Full=Uncharacterized protein {ECO:0000313|EnsemblPlants:TRIAE_CS42_3AS_TGACv1_211751_AA0693670.1};	Serine/threonine protein kinase	GO:0016021,integral component of membrane; GO:0005524,ATP binding; GO:0004674,protein serine/threonine kinase activity	Protein tyrosine kinase
TRINITY_DN102553_c0_g1_i1.path2	0	0.21	0	5.29	7.94	15.67	0	1	0	19	35	63	128.762	7.009	9.74011e-08	6.93514e-07	up	3A	411528551	411528796	+	TRINITY_DN102553_c0_g1_i1	--	K04733 interleukin-1 receptor-associated kinase 4 [EC:2.7.11.1] | (RefSeq) LEAF RUST 10 DISEASE-RESISTANCE LOCUS RECEPTOR-LIKE PROTEIN KINASE-like 2.4 isoform X1 (A)	LEAF RUST 10 DISEASE-RESISTANCE LOCUS RECEPTOR-LIKE PROTEIN KINASE-like 2.5 [Aegilops tauschii subsp. tauschii]	RecName: Full=LEAF RUST 10 DISEASE-RESISTANCE LOCUS RECEPTOR-LIKE PROTEIN KINASE-like 2.8 {ECO:0000303|PubMed:12805585}; EC=2.7.11.1; AltName: Full=Probable receptor-like serine/threonine-protein kinase LRK10L-2.8 {ECO:0000305}; Flags: Precursor;	SubName: Full=Uncharacterized protein {ECO:0000313|EnsemblPlants:TRIAE_CS42_3AS_TGACv1_211751_AA0693670.1};	Serine/threonine protein kinase	GO:0016021,integral component of membrane; GO:0005524,ATP binding; GO:0030247,polysaccharide binding; GO:0004674,protein serine/threonine kinase activity	Protein tyrosine kinase
TRINITY_DN102558_c0_g1_i1.path1	1.4	1.89	2.74	6.94	5.51	7.4	9	15	18	41	40	49	3.63	1.86	0.000112015	0.000495222	up	3D	349211591	349211995	+	TRINITY_DN102558_c0_g1_i1	--	--	--	--	--	--	--	--
TRINITY_DN102559_c0_g1_i1.path1	0	1.17	0	7.46	8.16	31.74	0	8	0	38	51	181	48.571	5.602	0.00140709	0.00493023	up	3C	600176523	600176871	+	TRINITY_DN102559_c0_g1_i1	--	--	hypothetical protein PAHAL_E01310 [Panicum hallii]	--	SubName: Full=Uncharacterized protein {ECO:0000313|EnsemblPlants:OPUNC01G32820.1};	--	GO:0004252,serine-type endopeptidase activity	--
TRINITY_DN102568_c0_g1_i1.path1	0	0	0	25.2	19.57	24.19	0	0	0	107	102	115	687.958	9.426	1.62195e-14	2.38202e-13	up	4A	375654499	375654789	-	TRINITY_DN102568_c0_g1_i1	--	K13420 LRR receptor-like serine/threonine-protein kinase FLS2 [EC:2.7.11.1] | (RefSeq) LRR receptor-like serine/threonine-protein kinase FLS2 (A)	leucine-rich repeat receptor-like serine/threonine-protein kinase BAM3 [Aegilops tauschii subsp. tauschii]	RecName: Full=Leucine-rich repeat receptor-like serine/threonine-protein kinase BAM3; EC=2.7.11.1; AltName: Full=Protein BARELY ANY MERISTEM 3; Flags: Precursor;	SubName: Full=Uncharacterized protein {ECO:0000313|EnsemblPlants:TRIAE_CS42_1DL_TGACv1_061176_AA0187790.1};	--	GO:0016021,integral component of membrane; GO:0005886,plasma membrane; GO:0005524,ATP binding; GO:0004674,protein serine/threonine kinase activity; GO:0030154,cell differentiation; GO:0048437,floral organ development; GO:0010075,regulation of meristem growth	Leucine Rich repeats (2 copies)
TRINITY_DN102568_c0_g1_i1.path2	0	0	0	7.77	3.84	7.36	0	0	0	33	20	35	190.255	7.572	9.21218e-09	7.46895e-08	up	3C	600695920	600696210	-	TRINITY_DN102568_c0_g1_i1	--	K13420 LRR receptor-like serine/threonine-protein kinase FLS2 [EC:2.7.11.1] | (RefSeq) LRR receptor-like serine/threonine-protein kinase FLS2 (A)	leucine-rich repeat receptor-like serine/threonine-protein kinase BAM3 [Aegilops tauschii subsp. tauschii]	RecName: Full=Leucine-rich repeat receptor-like serine/threonine-protein kinase BAM3; EC=2.7.11.1; AltName: Full=Protein BARELY ANY MERISTEM 3; Flags: Precursor;	SubName: Full=Uncharacterized protein {ECO:0000313|EnsemblPlants:TRIAE_CS42_1DL_TGACv1_061176_AA0187790.1};	--	GO:0016021,integral component of membrane; GO:0005886,plasma membrane; GO:0005524,ATP binding; GO:0004674,protein serine/threonine kinase activity; GO:0030154,cell differentiation; GO:0048437,floral organ development; GO:0010075,regulation of meristem growth	Leucine Rich repeats (2 copies)
TRINITY_DN102568_c0_g1_i1.path3	0	0	0	5.42	4.22	5.89	0	0	0	23	22	28	155.436	7.28	4.04578e-08	3.03572e-07	up	3D	369770687	369770977	-	TRINITY_DN102568_c0_g1_i1	--	K13420 LRR receptor-like serine/threonine-protein kinase FLS2 [EC:2.7.11.1] | (RefSeq) LRR receptor-like serine/threonine-protein kinase FLS2 (A)	leucine-rich repeat receptor-like serine/threonine-protein kinase BAM3 [Aegilops tauschii subsp. tauschii]	RecName: Full=Leucine-rich repeat receptor-like serine/threonine-protein kinase BAM3; EC=2.7.11.1; AltName: Full=Protein BARELY ANY MERISTEM 3; Flags: Precursor;	SubName: Full=Uncharacterized protein {ECO:0000313|EnsemblPlants:TRIAE_CS42_1DL_TGACv1_061176_AA0187790.1};	--	GO:0016021,integral component of membrane; GO:0005886,plasma membrane; GO:0005524,ATP binding; GO:0004674,protein serine/threonine kinase activity; GO:0030154,cell differentiation; GO:0048437,floral organ development; GO:0010075,regulation of meristem growth	Leucine Rich repeats (2 copies)
TRINITY_DN10257_c0_g1_i1.path1	4.43	8.13	8.8	22.68	18.47	18.92	29	66	59	137	137	128	3.082	1.624	8.33805e-07	5.22637e-06	up	3C	49514772	49515633	-	TRINITY_DN10257_c0_g1_i1	--	--	hypothetical protein TRIUR3_27708 [Triticum urartu]	--	SubName: Full=Uncharacterized protein {ECO:0000313|EnsemblPlants:TRIAE_CS42_5BS_TGACv1_423822_AA1383760.1};	--	--	--
TRINITY_DN102573_c0_g1_i1.path1	0	0.08	0.1	1.23	0.73	0.7	0	1	1	11	8	7	15.443	3.949	0.0038983	0.0121042	up	4D	111796429	111797043	+	TRINITY_DN102573_c0_g1_i1	--	K13447 respiratory burst oxidase [EC:1.6.3.- 1.11.1.-] | (RefSeq) respiratory burst oxidase homolog protein B (A)	PREDICTED: respiratory burst oxidase homolog protein B [Brachypodium distachyon]	RecName: Full=Respiratory burst oxidase homolog protein B; EC=1.11.1.-; EC=1.6.3.-; AltName: Full=NADPH oxidase RBOHB; AltName: Full=StRBOHB;	SubName: Full=Uncharacterized protein {ECO:0000313|EMBL:KQJ88319.1, ECO:0000313|EnsemblPlants:BRADI4G17020.1};	Ferric reductase, NADH/NADPH oxidase and related proteins	GO:0016021,integral component of membrane; GO:0005886,plasma membrane; GO:0005509,calcium ion binding; GO:0016174,NAD(P)H oxidase activity; GO:0004601,peroxidase activity; GO:0009408,response to heat; GO:0009845,seed germination	--
TRINITY_DN102573_c0_g1_i1.path2	0	0	0	0.89	0.45	1.19	0	0	0	8	5	12	54.431	5.766	0.00021991	0.000920244	up	4A	109817614	109818228	+	TRINITY_DN102573_c0_g1_i1	--	K13447 respiratory burst oxidase [EC:1.6.3.- 1.11.1.-] | (RefSeq) respiratory burst oxidase homolog protein B (A)	PREDICTED: respiratory burst oxidase homolog protein B [Brachypodium distachyon]	RecName: Full=Respiratory burst oxidase homolog protein B; EC=1.11.1.-; EC=1.6.3.-; AltName: Full=NADPH oxidase RBOHB; AltName: Full=StRBOHB;	SubName: Full=Uncharacterized protein {ECO:0000313|EMBL:KQJ88319.1, ECO:0000313|EnsemblPlants:BRADI4G17020.1};	Ferric reductase, NADH/NADPH oxidase and related proteins	GO:0016021,integral component of membrane; GO:0005886,plasma membrane; GO:0005509,calcium ion binding; GO:0016174,NAD(P)H oxidase activity; GO:0004601,peroxidase activity; GO:0009408,response to heat; GO:0009845,seed germination	--
TRINITY_DN10259_c0_g1_i2.path1	58.37	65.62	92.67	9.44	10.65	10.72	1409	1962	2289	210	291	267	0.156	-2.683	1.71646e-26	5.82953e-25	down	6A	431232749	431236540	-	TRINITY_DN10259_c0_g1_i2	--	K13811 3'-phosphoadenosine 5'-phosphosulfate synthase [EC:2.7.7.4 2.7.1.25] | (RefSeq) LOC109732641; ATP sulfurylase 2-like (A)	predicted protein [Hordeum vulgare subsp. vulgare]	RecName: Full=ATP sulfurylase 2; EC=2.7.7.4; Flags: Precursor;	SubName: Full=Predicted protein {ECO:0000313|EMBL:BAJ87231.1};	ATP sulfurylase (sulfate adenylyltransferase)	GO:0009507,chloroplast; GO:0009570,chloroplast stroma; GO:0005829,cytosol; GO:0004020,adenylylsulfate kinase activity; GO:0005524,ATP binding; GO:0004781,sulfate adenylyltransferase (ATP) activity; GO:0009970,cellular response to sulfate starvation; GO:0070814,hydrogen sulfide biosynthetic process; GO:0000103,sulfate assimilation	ATP-sulfurylase
TRINITY_DN10259_c0_g1_i2.path2	22.87	24.42	32.72	12.94	12.07	11.39	539	713	789	281	322	277	0.496	-1.011	2.00674e-05	0.000101608	down	5D	481192236	481196071	-	TRINITY_DN10259_c0_g1_i2	--	K13811 3'-phosphoadenosine 5'-phosphosulfate synthase [EC:2.7.7.4 2.7.1.25] | (RefSeq) LOC109732641; ATP sulfurylase 2-like (A)	ATP sulfurylase 2-like [Aegilops tauschii subsp. tauschii]	RecName: Full=ATP sulfurylase 2; EC=2.7.7.4; Flags: Precursor;	SubName: Full=Uncharacterized protein {ECO:0000313|EnsemblPlants:TRIAE_CS42_2BS_TGACv1_146556_AA0468210.2};	ATP sulfurylase (sulfate adenylyltransferase)	GO:0009507,chloroplast; GO:0009570,chloroplast stroma; GO:0005829,cytosol; GO:0004020,adenylylsulfate kinase activity; GO:0005524,ATP binding; GO:0004781,sulfate adenylyltransferase (ATP) activity; GO:0009970,cellular response to sulfate starvation; GO:0070814,hydrogen sulfide biosynthetic process; GO:0000103,sulfate assimilation	ATP-sulfurylase
TRINITY_DN102592_c0_g1_i1.path1	4.39	3.78	4.57	1.27	1.03	0.85	15	16	16	4	4	3	0.269	-1.895	0.0151046	0.0392636	down	3D	169863900	169864115	+	TRINITY_DN102592_c0_g1_i1	--	--	--	--	--	--	--	--
TRINITY_DN1026_c1_g2_i1.path1	7	6.68	6.52	12.06	14.07	12.88	170	201	162	270	387	323	2.126	1.088	1.17927e-06	7.2388e-06	up	7D	381046378	381048347	-	TRINITY_DN1026_c1_g2_i1	--	--	hypothetical protein BRADI_1g39260v3 [Brachypodium distachyon]	RecName: Full=BTB/POZ domain-containing protein POB1; AltName: Full=POZ/BTB CONTAINING-PROTEIN 1; Short=AtPOB1;	SubName: Full=Uncharacterized protein {ECO:0000313|EMBL:KQK18219.1};	--	GO:0031463,Cul3-RING ubiquitin ligase complex; GO:0005634,nucleus; GO:0046982,protein heterodimerization activity; GO:0042803,protein homodimerization activity; GO:0016567,protein ubiquitination; GO:0010114,response to red light	BTB And C-terminal Kelch
TRINITY_DN102600_c0_g1_i1.path1	4.18	5.69	7.53	0.24	0	0.64	19	32	35	1	0	3	0.055	-4.183	8.0496e-06	4.34713e-05	down	2C	256173092	256173938	+	TRINITY_DN102600_c0_g1_i1	--	--	--	--	--	--	--	--
TRINITY_DN102606_c0_g1_i1.path1	0	0	0	39.84	37.22	41.65	0	0	0	211	242	247	1477.45	10.529	3.30551e-18	6.54252e-17	up	4A	401885084	401885446	-	TRINITY_DN102606_c0_g1_i1	--	--	--	--	--	--	--	--
TRINITY_DN10262_c0_g1_i2.path1	2.54	4.19	3.28	7.28	8.09	7.19	25	51	33	66	90	73	2.477	1.308	0.000172782	0.000738224	up	7A	355787433	355788053	+	TRINITY_DN10262_c0_g1_i2	--	K17943 pumilio RNA-binding family | (RefSeq) LOC109770436; pumilio homolog 5-like isoform X1 (A)	pumilio homolog 5-like isoform X2 [Aegilops tauschii subsp. tauschii]	RecName: Full=Pumilio homolog 6, chloroplastic; Short=APUM-6; Short=AtPUM6; Flags: Precursor;	SubName: Full=Uncharacterized protein {ECO:0000313|EnsemblPlants:TRIAE_CS42_7BS_TGACv1_592123_AA1931230.1};	Translational repressor Pumilio/PUF3 and related RNA-binding proteins (Puf superfamily)	GO:0009507,chloroplast; GO:0003729,mRNA binding; GO:0006417,regulation of translation	--
TRINITY_DN10262_c0_g1_i2.path2	2.65	6.91	2.09	8.07	9	7.11	26	84	21	73	100	72	2.299	1.201	0.00400772	0.012408	up	7D	52343233	52343852	-	TRINITY_DN10262_c0_g1_i2	--	--	--	--	--	--	--	--
TRINITY_DN102626_c0_g1_i1.path1	4.36	10.36	5.44	0.53	1.5	0.7	18	53	23	2	7	3	0.151	-2.724	0.000124145	0.000544354	down	7C	633512730	633512990	+	TRINITY_DN102626_c0_g1_i1	--	--	--	--	--	--	--	--
TRINITY_DN10263_c0_g1_i2.path2	3.21	4.53	4.39	10.96	8.64	8.23	20	35	28	63	61	53	2.51	1.328	0.000510266	0.00197928	up	2A	185120689	185121082	-	TRINITY_DN10263_c0_g1_i2	--	--	--	--	--	--	--	--
TRINITY_DN102641_c0_g1_i1.path1	1.79	2.09	1.95	0	0	0	9	13	10	0	0	0	0.02	-5.628	0.000192634	0.000815485	down	5D	289915737	289916053	-	TRINITY_DN102641_c0_g1_i1	--	--	--	--	--	--	--	--
TRINITY_DN102642_c0_g1_i1.path1	4.61	5.77	4.96	0.75	1.22	0.89	20	31	22	3	6	4	0.207	-2.275	0.000856888	0.00316006	down	2A	351130007	351130280	+	TRINITY_DN102642_c0_g1_i1	--	--	--	--	--	--	--	--
TRINITY_DN102644_c0_g1_i1.path1	0.51	0.33	0.6	0	0	0	5	4	6	0	0	0	0.042	-4.586	0.0107496	0.0293317	down	3A	380179815	380180430	+	TRINITY_DN102644_c0_g1_i1	--	--	--	--	--	--	--	--
TRINITY_DN102650_c0_g1_i1.path2	2.16	5.45	4.22	12.3	6.92	19.09	8	25	16	42	29	73	3.653	1.869	0.000482075	0.00188079	up	2A	362188923	362189277	-	TRINITY_DN102650_c0_g1_i1	--	K00512 steroid 17alpha-monooxygenase / 17alpha-hydroxyprogesterone deacetylase [EC:1.14.14.19 1.14.14.32] | (RefSeq) LOC109735932; indole-2-monooxygenase-like isoform X1 (A)	indole-2-monooxygenase-like [Aegilops tauschii subsp. tauschii]	RecName: Full=indole-2-monooxygenase; EC=1.14.13.137; AltName: Full=Cytochrome P450 71C4; AltName: Full=Protein benzoxazineless 2;	SubName: Full=Uncharacterized protein {ECO:0000313|EnsemblPlants:TRIAE_CS42_6BS_TGACv1_513854_AA1650770.1};	Cytochrome P450 CYP2 subfamily	GO:0016021,integral component of membrane; GO:0020037,heme binding; GO:0036190,indole-2-monooxygenase activity; GO:0005506,iron ion binding	Cytochrome P450
TRINITY_DN102660_c0_g1_i1.path1	3.37	4.72	1.1	6.59	8.15	5.45	15	26	5	27	41	25	2.414	1.272	0.020064	0.0499147	up	6A	4649510	4649790	-	TRINITY_DN102660_c0_g1_i1	--	--	--	--	--	--	--	--
TRINITY_DN102668_c0_g1_i1.path1	21.28	13.7	10.14	0.15	0.83	0.26	158	126	77	1	7	2	0.031	-5.002	1.42055e-16	2.47177e-15	down	6A	85151628	85152096	-	TRINITY_DN102668_c0_g1_i1	--	--	--	--	--	--	--	--
TRINITY_DN102675_c0_g1_i1.path2	0.33	0.62	0.43	2.13	2.5	1.58	3	7	4	18	26	15	4.92	2.299	0.000973584	0.00354576	up	7D	56978560	56979139	+	TRINITY_DN102675_c0_g1_i1	--	--	--	--	--	--	--	--
TRINITY_DN102680_c0_g1_i1.path2	0.31	0.08	0.3	1.33	0.45	1.49	3	1	3	12	5	15	5.368	2.424	0.013932	0.0366139	up	7D	40320018	40320634	-	TRINITY_DN102680_c0_g1_i1	--	--	--	--	--	--	--	--
TRINITY_DN102683_c0_g1_i1.path1	0.62	1	1.82	67.87	54.55	65.42	3	6	9	302	298	326	60.49	5.919	3.32058e-42	2.4581e-40	up	4C	368178982	368179286	-	TRINITY_DN102683_c0_g1_i1	--	--	--	--	--	--	--	--
TRINITY_DN102683_c0_g1_i1.path2	3.91	7.48	8.85	113.42	113.11	127.59	19	45	44	508	622	640	19.29	4.27	3.19598e-46	2.75324e-44	up	4D	200716135	200716441	-	TRINITY_DN102683_c0_g1_i1	--	--	--	--	--	--	--	--
TRINITY_DN102683_c0_g1_i1.path3	8.05	11.33	11.7	145.6	94.14	175.01	39	68	58	650	516	875	14.915	3.899	4.6142e-35	2.45542e-33	up	4A	193230804	193231109	-	TRINITY_DN102683_c0_g1_i1	--	--	--	--	--	--	--	--
TRINITY_DN10270_c0_g1_i5.path1	0.43	0.55	0.51	2.31	2.95	1.62	14	22	17	69	108	54	4.992	2.32	5.45622e-09	4.5681e-08	up	6A	328700354	328702397	+	TRINITY_DN10270_c0_g1_i5	--	K04422 mitogen-activated protein kinase kinase kinase 13 [EC:2.7.11.25] | (RefSeq) serine/threonine-protein kinase EDR1 isoform X1 (A)	PREDICTED: leucine-rich repeat extensin-like protein 1 [Brachypodium distachyon]	--	SubName: Full=Uncharacterized protein {ECO:0000313|EMBL:KQK01288.1, ECO:0000313|EnsemblPlants:BRADI3G54940.1};	--	--	PB1 domain
TRINITY_DN10270_c0_g1_i5.path2	0.99	1.69	1.63	12.47	15.98	9.85	32	68	54	373	587	330	9.66	3.272	6.80185e-32	3.07935e-30	up	6D	289053561	289055611	+	TRINITY_DN10270_c0_g1_i5	--	K04422 mitogen-activated protein kinase kinase kinase 13 [EC:2.7.11.25] | (RefSeq) serine/threonine-protein kinase EDR1 isoform X1 (A)	PREDICTED: leucine-rich repeat extensin-like protein 1 [Brachypodium distachyon]	--	SubName: Full=Uncharacterized protein {ECO:0000313|EMBL:KQK01288.1, ECO:0000313|EnsemblPlants:BRADI3G54940.1};	--	--	PB1 domain
TRINITY_DN102700_c0_g1_i1.path1	0.42	0.57	1.1	6.08	7.18	4.89	3	5	8	40	58	36	9.532	3.253	1.1368e-08	9.11129e-08	up	3D	341994045	341994495	-	TRINITY_DN102700_c0_g1_i1	--	--	--	--	--	--	--	--
TRINITY_DN102703_c0_g1_i1.path1	5.74	7.46	6.86	13.56	16.79	20.07	67	108	82	146	222	242	2.796	1.483	3.56032e-07	2.35446e-06	up	4A	299511772	299512509	-	TRINITY_DN102703_c0_g1_i1	--	K19613 leucine-rich repeat protein SHOC2 | (Kazusa) Lj0g3v0304799.1; - (A)	Lysyl-tRNA synthetase [Triticum urartu]	RecName: Full=Receptor-like protein 11 {ECO:0000303|PubMed:18434605}; Short=AtRLP11 {ECO:0000303|PubMed:18434605}; Flags: Precursor;	RecName: Full=Lysine--tRNA ligase {ECO:0000256|RuleBase:RU003748}; EC=6.1.1.6 {ECO:0000256|RuleBase:RU003748}; AltName: Full=Lysyl-tRNA synthetase {ECO:0000256|RuleBase:RU003748};	FOG: Leucine rich repeat	GO:0016021,integral component of membrane	--
TRINITY_DN102706_c0_g1_i1.path1	0.65	0.61	0.11	2.47	1.72	2.62	6	7	1	21	18	25	5.543	2.471	0.000592016	0.00226338	up	6C	921443	922025	+	TRINITY_DN102706_c0_g1_i1	--	--	--	--	--	--	--	--
TRINITY_DN102711_c0_g1_i1.path1	21.76	17.36	19.98	0.28	1.62	0.51	83	82	78	1	7	2	0.046	-4.438	2.28975e-13	3.01859e-12	down	4C	75924520	75924760	+	TRINITY_DN102711_c0_g1_i1	--	--	--	--	--	--	--	--
TRINITY_DN102716_c0_g1_i1.path1	0	0	0	1.33	1.09	1.43	0	0	0	10	10	12	67.956	6.087	3.59191e-05	0.000174126	up	1A	517662850	517663882	+	TRINITY_DN102716_c0_g1_i1	--	--	--	--	--	--	--	--
TRINITY_DN102722_c0_g1_i1.path1	0	0.74	0.45	35.39	41.21	60.76	0	4	2	142	203	273	123.396	6.947	3.25345e-24	9.64898e-23	up	3D	437788500	437788774	-	TRINITY_DN102722_c0_g1_i1	--	--	--	--	--	--	--	--
TRINITY_DN102726_c0_g1_i1.path1	0.72	2.32	1.4	0	0.21	0	3	12	6	0	1	0	0.063	-4	0.0153376	0.039785	down	7C	318155401	318155664	+	TRINITY_DN102726_c0_g1_i1	--	--	--	--	--	--	--	--
TRINITY_DN102728_c0_g1_i1.path1	0	0	0	0.63	0.39	0.7	0	0	0	4	3	5	25.819	4.69	0.0111034	0.030152	up	5D	498824372	498937469	+	TRINITY_DN102728_c0_g1_i1	--	K04733 interleukin-1 receptor-associated kinase 4 [EC:2.7.11.1] | (RefSeq) LOC109782205; putative receptor-like protein kinase At4g00960 isoform X1 (A)	putative receptor-like protein kinase At4g00960 isoform X2 [Aegilops tauschii subsp. tauschii]	RecName: Full=Cysteine-rich receptor-like protein kinase 10; Short=Cysteine-rich RLK10; EC=2.7.11.-; AltName: Full=Receptor-like protein kinase 4; Flags: Precursor;	SubName: Full=Uncharacterized protein {ECO:0000313|EnsemblPlants:HORVU5Hr1G001000.5};	--	GO:0016021,integral component of membrane; GO:0005886,plasma membrane; GO:0005524,ATP binding; GO:0004674,protein serine/threonine kinase activity; GO:0042742,defense response to bacterium; GO:0006468,protein phosphorylation	Protein kinase domain
TRINITY_DN10274_c0_g1_i2.path1	2.07	2.28	2.94	0.2	0.33	0.73	11	15	16	1	2	4	0.195	-2.362	0.00975347	0.0269691	down	2D	358753089	358756002	+	TRINITY_DN10274_c0_g1_i2	--	--	--	--	--	--	--	--
TRINITY_DN102750_c0_g1_i1.path1	47.52	45.14	48.08	101.9	110.67	80.43	170	200	176	336	448	297	2.269	1.182	7.6697e-08	5.53675e-07	up	5C	473207833	473208058	+	TRINITY_DN102750_c0_g1_i1	--	--	--	--	--	--	--	--
TRINITY_DN102756_c0_g1_i1.path1	0.6	0	0	2.26	2.37	2.02	2	0	0	7	9	7	12.936	3.693	0.00922971	0.0257204	up	3C	604935513	604935724	+	TRINITY_DN102756_c0_g1_i1	--	--	--	--	--	--	--	--
TRINITY_DN102781_c0_g1_i1.path1	2.82	1.61	2.49	14.02	8.32	12.59	41	29	37	188	137	189	5.592	2.483	2.67813e-12	3.18316e-11	up	6C	230155749	230156667	+	TRINITY_DN102781_c0_g1_i1	--	K09286 EREBP-like factor | (RefSeq) LOC109785342; dehydration-responsive element-binding protein 2C-like (A)	ethylene-responsive transcription factor ERF010-like [Aegilops tauschii subsp. tauschii]	--	SubName: Full=AP2-containing protein {ECO:0000313|EMBL:ABE02627.1}; SubName: Full=Putative AP2 protein {ECO:0000313|EMBL:ABE02643.1};	--	GO:0005634,nucleus; GO:0003677,DNA binding; GO:0003700,DNA-binding transcription factor activity; GO:0006351,transcription, DNA-templated	--
TRINITY_DN10279_c0_g1_i1.path1	6.28	5.37	3.83	2.65	2.57	1.79	136	144	85	53	63	40	0.495	-1.014	0.00140967	0.00493834	down	5D	385049212	385050580	+	TRINITY_DN10279_c0_g1_i1	--	K15121 solute carrier family 25, member 44 | (RefSeq) LOC109773860; solute carrier family 25 member 44-like (A)	hypothetical protein TRIUR3_26455 [Triticum urartu]	--	SubName: Full=Uncharacterized protein {ECO:0000313|EMBL:EMS59337.1, ECO:0000313|EnsemblPlants:TRIUR3_26455-P1};	Predicted mitochondrial carrier protein	GO:0016021,integral component of membrane	--
TRINITY_DN1028_c0_g1_i3.path1	43.04	43.03	48.75	3.54	6.41	4.05	1133	1403	1313	86	191	110	0.113	-3.142	1.21726e-36	6.98876e-35	down	7C	24833465	24838142	-	TRINITY_DN1028_c0_g1_i3	--	K12448 UDP-arabinose 4-epimerase [EC:5.1.3.5] | (RefSeq) probable UDP-arabinose 4-epimerase 1 (A)	metal tolerance protein 4 [Sorghum bicolor]	RecName: Full=Metal tolerance protein 4; Short=OsMTP4;	SubName: Full=Uncharacterized protein {ECO:0000313|EMBL:EER92593.1};	Mitochondrial Fe2+ transporter MMT1 and related transporters (cation diffusion facilitator superfamily)	GO:0016021,integral component of membrane; GO:0005774,vacuolar membrane; GO:0008324,cation transmembrane transporter activity	Cation efflux family
TRINITY_DN10280_c0_g1_i1.path1	0	0.52	0	244.75	342.46	341.84	0	7	0	2471	4245	3865	1979.72	10.951	1.74664e-19	3.75735e-18	up	2D	331202927	331203815	-	TRINITY_DN10280_c0_g1_i1	--	K21407 adipocyte plasma membrane-associated protein | (RefSeq) LOC109787019; protein STRICTOSIDINE SYNTHASE-LIKE 4-like (A)	predicted protein, partial [Hordeum vulgare subsp. vulgare]	RecName: Full=Protein STRICTOSIDINE SYNTHASE-LIKE 10 {ECO:0000303|PubMed:10777701}; Short=AtSSL10 {ECO:0000303|PubMed:10777701}; AltName: Full=Strictosidine synthase 8; Short=AtSS8; Flags: Precursor;	SubName: Full=Predicted protein {ECO:0000313|EMBL:BAJ95754.1}; Flags: Fragment;	Predicted alkaloid synthase/Surface mucin Hemomucin	GO:0005783,endoplasmic reticulum; GO:0016020,membrane; GO:0009505,plant-type cell wall; GO:0005886,plasma membrane; GO:0009506,plasmodesma; GO:0005773,vacuole; GO:0016788,hydrolase activity, acting on ester bonds; GO:0009058,biosynthetic process	Strictosidine synthase
TRINITY_DN10280_c0_g1_i1.path2	0.09	0.37	0.27	63.83	76.72	91.45	1	5	3	637	940	1022	341.278	8.415	4.44838e-53	5.00309e-51	up	6A	367679728	367680623	-	TRINITY_DN10280_c0_g1_i1	--	K21407 adipocyte plasma membrane-associated protein | (RefSeq) LOC109787019; protein STRICTOSIDINE SYNTHASE-LIKE 4-like (A)	predicted protein, partial [Hordeum vulgare subsp. vulgare]	RecName: Full=Protein STRICTOSIDINE SYNTHASE-LIKE 10 {ECO:0000303|PubMed:10777701}; Short=AtSSL10 {ECO:0000303|PubMed:10777701}; AltName: Full=Strictosidine synthase 8; Short=AtSS8; Flags: Precursor;	SubName: Full=Predicted protein {ECO:0000313|EMBL:BAJ95754.1}; Flags: Fragment;	Predicted alkaloid synthase/Surface mucin Hemomucin	GO:0005783,endoplasmic reticulum; GO:0016020,membrane; GO:0009505,plant-type cell wall; GO:0005886,plasma membrane; GO:0009506,plasmodesma; GO:0005773,vacuole; GO:0016788,hydrolase activity, acting on ester bonds; GO:0009058,biosynthetic process	Strictosidine synthase
TRINITY_DN102800_c0_g1_i1.path1	0.86	0.63	0.76	1.36	1.45	2.87	11	10	10	16	21	38	2.848	1.51	0.0119939	0.0322106	up	1D	224792696	224793504	+	TRINITY_DN102800_c0_g1_i1	--	K04733 interleukin-1 receptor-associated kinase 4 [EC:2.7.11.1] | (RefSeq) probable receptor-like protein kinase At1g33260 (A)	probable receptor-like protein kinase At4g10390 [Aegilops tauschii subsp. tauschii]	RecName: Full=Probable receptor-like protein kinase At4g10390; EC=2.7.11.1;	SubName: Full=Uncharacterized protein {ECO:0000313|EnsemblPlants:TRIAE_CS42_1BL_TGACv1_030840_AA0102030.1};	Serine/threonine protein kinase	GO:0005524,ATP binding; GO:0004674,protein serine/threonine kinase activity; GO:0009611,response to wounding	--
TRINITY_DN102802_c0_g1_i1.path1	3.4	3.66	2.43	5.65	10.2	7.9	15	20	11	23	51	36	2.766	1.468	0.00259646	0.00848852	up	2D	484968798	484969076	-	TRINITY_DN102802_c0_g1_i1	--	--	--	--	--	--	--	--
TRINITY_DN102803_c0_g1_i1.path1	0	0.42	0.34	7.66	5.02	11.51	0	3	2	41	33	69	35.012	5.13	5.28063e-10	4.95515e-09	up	2C	105932417	105932783	-	TRINITY_DN102803_c0_g1_i1	--	K04733 interleukin-1 receptor-associated kinase 4 [EC:2.7.11.1] | (RAP-DB) Os07g0668500; Protein kinase, catalytic domain domain containing protein. (A)	hypothetical protein BRADI_1g25727v3 [Brachypodium distachyon]	--	SubName: Full=Uncharacterized protein {ECO:0000313|EMBL:KQK15909.1};	--	GO:0016021,integral component of membrane	Salt stress response/antifungal
TRINITY_DN10281_c0_g1_i1.path1	8.33	8.04	8.14	23.76	25.27	19.99	46	55	46	121	158	114	3.084	1.625	1.68556e-08	1.32473e-07	up	5C	592321603	592321951	-	TRINITY_DN10281_c0_g1_i1	--	K13899 cystatin-C | (RefSeq) LOC109743164; cysteine proteinase inhibitor 8-like (A)	cystatin precursor [Dactylis glomerata]	RecName: Full=Cysteine proteinase inhibitor 8; AltName: Full=Oryzacystatin VIII; Short=OC-VIII; AltName: Full=Oryzacystatin-8; Flags: Precursor;	RecName: Full=Cysteine proteinase inhibitor {ECO:0000256|RuleBase:RU362130};	--	GO:0005576,extracellular region; GO:0004869,cysteine-type endopeptidase inhibitor activity; GO:0002020,protease binding; GO:0006952,defense response; GO:2000117,negative regulation of cysteine-type endopeptidase activity	Aspartic acid proteinase inhibitor
TRINITY_DN10283_c0_g1_i4.path1	7.18	7.22	8.81	2.94	3.54	2.96	310	386	389	117	173	132	0.445	-1.168	1.29633e-06	7.9047e-06	down	6D	255236781	255242061	+	TRINITY_DN10283_c0_g1_i4	--	K08853 AP2-associated kinase [EC:2.7.11.1] | (RefSeq) LOC109781445; probable serine/threonine-protein kinase DDB_G0276461 (A)	probable serine/threonine-protein kinase DDB_G0276461 [Aegilops tauschii subsp. tauschii]	RecName: Full=CBL-interacting protein kinase 22; EC=2.7.11.1; AltName: Full=OsCIPK22;	SubName: Full=Uncharacterized protein {ECO:0000313|EnsemblPlants:TRIUR3_34041-P1};	ARK protein kinase family	GO:0005622,intracellular; GO:0005524,ATP binding; GO:0004674,protein serine/threonine kinase activity; GO:0035556,intracellular signal transduction; GO:0018105,peptidyl-serine phosphorylation; GO:0018107,peptidyl-threonine phosphorylation	Protein kinase domain
TRINITY_DN10283_c0_g1_i4.path2	8.12	8.02	9.87	2.13	2.34	3.06	344	421	428	83	112	134	0.32	-1.642	2.46428e-09	2.14702e-08	down	6A	293711601	293716822	+	TRINITY_DN10283_c0_g1_i4	--	K08853 AP2-associated kinase [EC:2.7.11.1] | (RefSeq) LOC109781445; probable serine/threonine-protein kinase DDB_G0276461 (A)	probable serine/threonine-protein kinase DDB_G0276461 [Aegilops tauschii subsp. tauschii]	RecName: Full=CBL-interacting protein kinase 22; EC=2.7.11.1; AltName: Full=OsCIPK22;	SubName: Full=Uncharacterized protein {ECO:0000313|EnsemblPlants:TRIUR3_34041-P1};	ARK protein kinase family	GO:0005622,intracellular; GO:0005524,ATP binding; GO:0004674,protein serine/threonine kinase activity; GO:0035556,intracellular signal transduction; GO:0018105,peptidyl-serine phosphorylation; GO:0018107,peptidyl-threonine phosphorylation	Protein kinase domain
TRINITY_DN102834_c0_g1_i1.path2	2.87	1.57	3.1	6	5.61	5.06	28	19	31	54	62	51	2.418	1.274	0.00212595	0.00711388	up	3A	268639180	268639796	-	TRINITY_DN102834_c0_g1_i1	--	--	--	--	--	--	--	--
TRINITY_DN102835_c0_g1_i1.path1	9.74	7.16	6.98	1.17	0.76	0.84	45	41	33	5	4	4	0.126	-2.984	1.30458e-06	7.95224e-06	down	1D	296014918	296015209	-	TRINITY_DN102835_c0_g1_i1	--	K07305 peptide-methionine (R)-S-oxide reductase [EC:1.8.4.12] | (RefSeq) uncharacterized mitochondrial protein AtMg00810-like (A)	PREDICTED: uncharacterized mitochondrial protein AtMg00810-like isoform X2 [Brachypodium distachyon]	RecName: Full=Retrovirus-related Pol polyprotein from transposon RE2; AltName: Full=Retro element 2 {ECO:0000303|PubMed:10689195}; Short=AtRE2 {ECO:0000303|PubMed:10689195}; Includes: RecName: Full=Protease RE2; EC=3.4.23.-; Includes: RecName: Full=Reverse transcriptase RE2; EC=2.7.7.49; Includes: RecName: Full=Endonuclease RE2;	SubName: Full=Uncharacterized protein {ECO:0000313|EnsemblPlants:TRIAE_CS42_4BL_TGACv1_321247_AA1057850.1};	FOG: Transposon-encoded proteins with TYA, reverse transcriptase, integrase domains in various combinations	GO:0004190,aspartic-type endopeptidase activity; GO:0004519,endonuclease activity; GO:0046872,metal ion binding; GO:0003676,nucleic acid binding; GO:0003964,RNA-directed DNA polymerase activity; GO:0015074,DNA integration; GO:0006310,DNA recombination	--
TRINITY_DN102836_c0_g1_i1.path1	77.64	62.52	76.68	25.65	22.33	21.32	381	380	385	116	124	108	0.349	-1.519	5.61922e-10	5.25445e-09	down	3D	312969856	312970165	-	TRINITY_DN102836_c0_g1_i1	--	--	--	--	--	--	--	--
TRINITY_DN102839_c0_g1_i1.path1	0.59	0.8	1.35	7.07	2.97	5.36	3	5	7	33	17	28	6.187	2.629	0.000102576	0.000457095	up	7C	484606536	484606855	-	TRINITY_DN102839_c0_g1_i1	--	--	--	--	--	--	--	--
TRINITY_DN102842_c0_g1_i1.path1	11.55	8.53	6.73	0.8	0.87	0.95	47	43	28	3	4	4	0.108	-3.212	7.8781e-07	4.95742e-06	down	7D	510738493	510738749	-	TRINITY_DN102842_c0_g1_i1	--	--	--	--	--	--	--	--
TRINITY_DN102847_c0_g1_i1.path1	0	0	0	0.9	0.85	0.8	0	0	0	6	7	6	39.842	5.316	0.00116725	0.00416972	up	6C	182839577	182840035	-	TRINITY_DN102847_c0_g1_i1	--	--	--	--	--	--	--	--
TRINITY_DN102849_c0_g1_i1.path1	8.28	5.98	2.55	0.47	0.77	0.63	38	34	12	2	4	3	0.125	-3.005	9.98556e-05	0.000446083	down	6C	593456590	593456879	-	TRINITY_DN102849_c0_g1_i1	--	--	--	--	--	--	--	--
TRINITY_DN10286_c0_g1_i2.path1	0.45	0.67	0.98	1.46	1.4	1.74	13	24	29	39	46	52	2.421	1.276	0.00478423	0.0144738	up	7A	381145021	381147586	-	TRINITY_DN10286_c0_g1_i2	--	K00430 peroxidase [EC:1.11.1.7] | (RefSeq) peroxidase 1-like (A)	PREDICTED: peroxidase 1-like [Brachypodium distachyon]	RecName: Full=Peroxidase 1; EC=1.11.1.7; Flags: Precursor;	RecName: Full=Peroxidase {ECO:0000256|RuleBase:RU362060, ECO:0000256|SAAS:SAAS00709852}; EC=1.11.1.7 {ECO:0000256|RuleBase:RU362060, ECO:0000256|SAAS:SAAS00709852};	--	GO:0005576,extracellular region; GO:0009505,plant-type cell wall; GO:0009506,plasmodesma; GO:0020037,heme binding; GO:0046872,metal ion binding; GO:0004601,peroxidase activity; GO:0042744,hydrogen peroxide catabolic process; GO:0009664,plant-type cell wall organization; GO:0006979,response to oxidative stress	Peroxidase
TRINITY_DN102869_c0_g1_i1.path1	0.84	0	0.62	1.83	3.35	3.47	4	0	3	8	18	17	6.733	2.751	0.00343629	0.0108417	up	5D	282057680	282057979	-	TRINITY_DN102869_c0_g1_i1	--	--	hypothetical protein PAHAL_H00782, partial [Panicum hallii]	--	SubName: Full=Uncharacterized protein {ECO:0000313|EnsemblPlants:OGLUM11G03190.3};	--	--	--
TRINITY_DN102878_c0_g1_i1.path1	13.3	13.53	9.25	2.22	2.83	1.36	104	131	74	16	25	11	0.194	-2.363	1.18186e-09	1.06855e-08	down	4D	413984893	413985486	-	TRINITY_DN102878_c0_g1_i1	--	--	hypothetical protein PAHAL_I03732 [Panicum hallii]	--	--	--	--	--
TRINITY_DN10288_c0_g1_i1.path2	1.68	0.98	1.46	0.2	0.49	0.18	18	13	16	2	6	2	0.234	-2.096	0.0113881	0.0308306	down	3D	56575110	56575787	-	TRINITY_DN10288_c0_g1_i1	--	--	--	--	--	--	--	--
TRINITY_DN102881_c0_g1_i1.path1	0	0.53	0.43	2.13	1.54	1.9	0	3	2	9	8	9	6.307	2.657	0.0156821	0.0405619	up	5A	128786680	128786969	-	TRINITY_DN102881_c0_g1_i1	--	--	--	--	--	--	--	--
TRINITY_DN102882_c0_g1_i1.path1	2.06	2.72	2.97	9.89	10.65	9.15	19	31	28	84	111	87	4.197	2.069	2.50679e-09	2.18205e-08	up	6C	519497945	519498526	+	TRINITY_DN102882_c0_g1_i1	--	--	--	--	--	--	--	--
TRINITY_DN102885_c0_g1_i1.path1	0	0.21	0	7.2	12.67	11.57	0	1	0	25	54	45	131.957	7.044	3.78348e-08	2.85016e-07	up	6A	238200465	238200702	-	TRINITY_DN102885_c0_g1_i1	--	--	--	--	--	--	--	--
TRINITY_DN1029_c0_g1_i2.path1	0.19	0	0.14	2.95	1.89	0.69	4	0	3	57	45	15	18.522	4.211	1.55534e-07	1.07954e-06	up	6D	224868738	224870063	+	TRINITY_DN1029_c0_g1_i2	--	--	--	--	--	--	--	--
TRINITY_DN10290_c1_g1_i1.path1	0	0.64	0	12.67	7.98	22.37	0	3	0	44	34	87	68.982	6.108	9.67002e-10	8.8269e-09	up	7C	74171532	74171769	+	TRINITY_DN10290_c1_g1_i1	--	--	--	--	--	--	--	--
TRINITY_DN102910_c0_g1_i1.path1	1.46	3.35	2.63	6.2	5.74	9.98	13	37	24	51	58	92	3.307	1.726	0.000105264	0.000467911	up	1A	380391795	380392358	+	TRINITY_DN102910_c0_g1_i1	--	--	--	--	--	--	--	--
TRINITY_DN102918_c0_g1_i1.path3	20.39	19.48	12.35	25.55	34.51	37	71	84	44	82	136	133	2.072	1.051	0.00125128	0.00443858	up	1A	285505261	285505480	+	TRINITY_DN102918_c0_g1_i1	--	--	--	--	--	--	--	--
TRINITY_DN10293_c0_g1_i1.path1	8.46	9.13	6.72	19.95	19.96	17.28	246	329	200	535	657	519	2.589	1.372	1.87523e-11	2.05086e-10	up	5C	566172903	566177514	-	TRINITY_DN10293_c0_g1_i1	--	--	myosin heavy chain, embryonic smooth muscle isoform [Aegilops tauschii subsp. tauschii]	RecName: Full=Uncharacterized protein At3g49055;	SubName: Full=Uncharacterized protein {ECO:0000313|EnsemblPlants:TRIAE_CS42_5DL_TGACv1_435445_AA1450730.2};	--	--	--
TRINITY_DN10293_c0_g1_i1.path2	2.37	2.75	2.86	8.92	9.85	8.97	69	99	85	239	324	269	3.818	1.933	3.85668e-15	5.97592e-14	up	5D	428870207	428874750	-	TRINITY_DN10293_c0_g1_i1	--	--	myosin heavy chain, embryonic smooth muscle isoform [Aegilops tauschii subsp. tauschii]	RecName: Full=Uncharacterized protein At3g49055;	SubName: Full=Uncharacterized protein {ECO:0000313|EnsemblPlants:TRIAE_CS42_5DL_TGACv1_435445_AA1450730.2};	--	--	--
TRINITY_DN102934_c0_g1_i1.path1	28.1	40.12	26.37	2.93	6.56	1.96	125	221	120	12	33	9	0.133	-2.912	2.98681e-13	3.89234e-12	down	6C	105185794	105186074	-	TRINITY_DN102934_c0_g1_i1	--	--	--	--	--	--	--	--
TRINITY_DN102936_c0_g1_i1.path1	16.43	21.71	15.17	8.81	5.42	8.04	91	149	86	45	34	46	0.463	-1.112	0.00115773	0.00413844	down	1C	432838795	432839144	+	TRINITY_DN102936_c0_g1_i1	--	K04730 interleukin-1 receptor-associated kinase 1 [EC:2.7.11.1] | (RefSeq) LOC109738587; receptor kinase-like protein Xa21 (A)	PREDICTED: probable LRR receptor-like serine/threonine-protein kinase At3g47570 [Oryza sativa Japonica Group]	RecName: Full=Putative receptor-like protein kinase At3g47110; EC=2.7.11.1; Flags: Precursor;	SubName: Full=Uncharacterized protein {ECO:0000313|EnsemblPlants:TRIUR3_04293-P1};	--	GO:0016021,integral component of membrane; GO:0005886,plasma membrane; GO:0005524,ATP binding; GO:0004674,protein serine/threonine kinase activity	Protein tyrosine kinase
TRINITY_DN102937_c0_g1_i1.path1	84.29	71.96	61.11	27.1	23.5	28.1	523	553	388	155	165	180	0.401	-1.32	4.37681e-08	3.26726e-07	down	6D	265563695	265565025	-	TRINITY_DN102937_c0_g1_i1	--	K04733 interleukin-1 receptor-associated kinase 4 [EC:2.7.11.1] | (RefSeq) probable serine/threonine-protein kinase PBL19 isoform X3 (A)	hypothetical protein BRADI_1g60212v3, partial [Brachypodium distachyon]	--	SubName: Full=Uncharacterized protein {ECO:0000313|EMBL:KQK21326.1}; Flags: Fragment;	--	--	--
TRINITY_DN102956_c0_g1_i1.path1	5.23	5.16	6.81	0.88	1.23	0.34	45	55	60	7	12	3	0.154	-2.697	4.97429e-07	3.2218e-06	down	4C	33591294	33591837	-	TRINITY_DN102956_c0_g1_i1	--	--	--	--	--	--	--	--
TRINITY_DN102958_c0_g1_i1.path1	2.42	2.1	1.63	0	0.16	0.36	13	14	9	0	1	2	0.098	-3.358	0.0042242	0.0129957	down	4C	534148397	534148736	+	TRINITY_DN102958_c0_g1_i1	--	--	--	--	--	--	--	--
TRINITY_DN102965_c0_g1_i1.path1	6.96	3.12	3.78	0	0	0	27	15	15	0	0	0	0.011	-6.509	3.08425e-06	1.7745e-05	down	2D	349907859	349908103	+	TRINITY_DN102965_c0_g1_i1	--	--	--	--	--	--	--	--
TRINITY_DN102968_c0_g1_i1.path1	0	0.14	0.5	2.41	2.12	1.33	0	1	3	13	14	8	9.934	3.312	0.00230018	0.00762216	up	6C	142854489	142854857	-	TRINITY_DN102968_c0_g1_i1	--	K03006 DNA-directed RNA polymerase II subunit RPB1 [EC:2.7.7.6] | (RefSeq) LOW QUALITY PROTEIN: DNA-directed RNA polymerase II subunit 1-like (A)	uncharacterized protein LOC111776361 [Cucurbita pepo subsp. pepo]	RecName: Full=Retrovirus-related Pol polyprotein from transposon TNT 1-94; Includes: RecName: Full=Protease; EC=3.4.23.-; Includes: RecName: Full=Reverse transcriptase; EC=2.7.7.49; Includes: RecName: Full=Endonuclease;	SubName: Full=Uncharacterized protein {ECO:0000313|EnsemblPlants:TRIAE_CS42_5BL_TGACv1_404276_AA1293550.1};	FOG: Transposon-encoded proteins with TYA, reverse transcriptase, integrase domains in various combinations	GO:0004190,aspartic-type endopeptidase activity; GO:0004519,endonuclease activity; GO:0003676,nucleic acid binding; GO:0003964,RNA-directed DNA polymerase activity; GO:0008270,zinc ion binding; GO:0015074,DNA integration	--
TRINITY_DN102978_c0_g1_i1.path1	1.22	1.31	0.79	2.87	5.39	3.94	6	8	4	13	30	20	4.041	2.015	0.0023283	0.00770596	up	3C	591230361	591230671	-	TRINITY_DN102978_c0_g1_i1	--	--	--	--	--	--	--	--
TRINITY_DN102983_c0_g1_i1.path1	4.03	7.6	5.69	14.34	7.52	12.81	18	42	26	59	38	59	2.217	1.148	0.00853998	0.0240159	up	7C	418283220	418283501	-	TRINITY_DN102983_c0_g1_i1	--	--	--	--	--	--	--	--
TRINITY_DN102988_c0_g1_i1.path2	0.53	1.07	0.77	6.02	1.17	4.1	2	5	3	21	5	16	5.237	2.389	0.00693871	0.0200263	up	5D	333331278	333331516	+	TRINITY_DN102988_c0_g1_i1	--	--	--	--	--	--	--	--
TRINITY_DN1030_c0_g1_i11.path1	18.17	17.95	15.25	4.38	7.74	3.36	1972	2413	1694	438	951	377	0.326	-1.619	4.20301e-10	3.98945e-09	down	4C	500483674	500494156	-	TRINITY_DN1030_c0_g1_i11	--	--	--	--	--	--	--	--
TRINITY_DN103005_c0_g1_i1.path1	0.98	3.76	1.68	3.72	7.14	5.93	4	19	7	14	33	25	2.891	1.531	0.0157494	0.0407101	up	5C	89748118	89748375	+	TRINITY_DN103005_c0_g1_i1	--	--	--	--	--	--	--	--
TRINITY_DN103008_c0_g1_i1.path1	24.23	9.41	17.38	27.62	47.43	30.31	79	38	58	83	175	102	2.244	1.166	0.00239856	0.00791319	up	6C	19579909	19580114	+	TRINITY_DN103008_c0_g1_i1	--	--	--	--	--	--	--	--
TRINITY_DN10301_c0_g1_i5.path1	8.3	7	8.11	32.42	33.18	37.45	314	328	314	1131	1421	1463	4.861	2.281	1.11802e-24	3.41027e-23	up	6D	34735912	34738302	-	TRINITY_DN10301_c0_g1_i5	--	K04733 interleukin-1 receptor-associated kinase 4 [EC:2.7.11.1] | (RefSeq) LOC109787390; U-box domain-containing protein 12-like (A)	U-box domain-containing protein 4 [Triticum urartu]	RecName: Full=U-box domain-containing protein 4; EC=2.3.2.27; AltName: Full=Plant U-box protein 4; Short=OsPUB4; AltName: Full=RING-type E3 ubiquitin transferase PUB4 {ECO:0000305};	RecName: Full=RING-type E3 ubiquitin transferase {ECO:0000256|SAAS:SAAS00702733}; EC=2.3.2.27 {ECO:0000256|SAAS:SAAS00702733};	FOG: Armadillo/beta-catenin-like repeats	GO:0005737,cytoplasm; GO:0005634,nucleus; GO:0004842,ubiquitin-protein transferase activity; GO:0009814,defense response, incompatible interaction; GO:0016567,protein ubiquitination	--
TRINITY_DN10301_c0_g1_i5.path2	15.19	18.2	15.24	36.87	37.1	43.08	575	853	590	1286	1589	1683	2.674	1.419	1.15097e-11	1.28482e-10	up	6A	65646114	65648504	-	TRINITY_DN10301_c0_g1_i5	--	K04733 interleukin-1 receptor-associated kinase 4 [EC:2.7.11.1] | (RefSeq) LOC109787390; U-box domain-containing protein 12-like (A)	U-box domain-containing protein 4 [Triticum urartu]	RecName: Full=U-box domain-containing protein 4; EC=2.3.2.27; AltName: Full=Plant U-box protein 4; Short=OsPUB4; AltName: Full=RING-type E3 ubiquitin transferase PUB4 {ECO:0000305};	RecName: Full=RING-type E3 ubiquitin transferase {ECO:0000256|SAAS:SAAS00702733}; EC=2.3.2.27 {ECO:0000256|SAAS:SAAS00702733};	FOG: Armadillo/beta-catenin-like repeats	GO:0005737,cytoplasm; GO:0005634,nucleus; GO:0004842,ubiquitin-protein transferase activity; GO:0009814,defense response, incompatible interaction; GO:0016567,protein ubiquitination	--
TRINITY_DN10301_c1_g1_i3.path1	0.86	0.98	0.43	5.95	6.13	5.54	29	41	15	185	234	193	8.526	3.092	1.73183e-22	4.56875e-21	up	3D	375725389	375729615	-	TRINITY_DN10301_c1_g1_i3	--	--	unnamed protein product [Triticum aestivum]	--	SubName: Full=Uncharacterized protein {ECO:0000313|EnsemblPlants:TRIAE_CS42_3AS_TGACv1_210908_AA0681280.2};	--	GO:0016021,integral component of membrane; GO:0016760,cellulose synthase (UDP-forming) activity; GO:0071555,cell wall organization; GO:0030244,cellulose biosynthetic process	--
TRINITY_DN10302_c0_g1_i5.path1	4.8	4.82	4	0.38	0.85	0.7	300	373	256	22	60	45	0.157	-2.669	2.67233e-18	5.31981e-17	down	1A	55549917	55555843	+	TRINITY_DN10302_c0_g1_i5	--	--	--	--	--	--	--	--
TRINITY_DN103031_c0_g1_i1.path1	1.01	1.64	2.31	10.26	13.14	7.36	6	12	14	56	88	45	6.716	2.748	4.75791e-09	4.0145e-08	up	5C	433901111	433903951	-	TRINITY_DN103031_c0_g1_i1	--	--	--	--	--	--	--	--
TRINITY_DN10304_c2_g1_i1.path1	1.02	1.37	0.83	0	0	0	6	10	5	0	0	0	0.031	-4.994	0.00271974	0.00884158	down	6C	552880281	552880651	-	TRINITY_DN10304_c2_g1_i1	--	--	--	--	--	--	--	--
TRINITY_DN103040_c0_g1_i1.path1	0.22	0.53	0.42	549.28	621.77	592.69	1	3	2	2332	3241	2818	1633.81	10.674	2.75039e-65	4.83264e-63	up	6D	277866058	277866348	+	TRINITY_DN103040_c0_g1_i1	--	K14157 alpha-aminoadipic semialdehyde synthase [EC:1.5.1.8 1.5.1.9] | (RefSeq) LOC109771574; alpha-aminoadipic semialdehyde synthase isoform X1 (A)	saccharopine dehydrogenase-like protein [Hordeum vulgare]	RecName: Full=Alpha-aminoadipic semialdehyde synthase; AltName: Full=cAt-LKR/SDH; Short=LKR/SDH; Includes: RecName: Full=Lysine ketoglutarate reductase; Short=LKR; EC=1.5.1.8; Includes: RecName: Full=Saccharopine dehydrogenase; EC=1.5.1.9; AltName: Full=cAt-SDH; Short=SDH;	SubName: Full=Uncharacterized protein {ECO:0000313|EnsemblPlants:HORVU6Hr1G083050.27};	Lysine-ketoglutarate reductase/saccharopine dehydrogenase	GO:0005737,cytoplasm; GO:0047131,saccharopine dehydrogenase (NAD+, L-glutamate-forming) activity; GO:0047130,saccharopine dehydrogenase (NADP+, L-lysine-forming) activity; GO:0004753,saccharopine dehydrogenase activity; GO:0006091,generation of precursor metabolites and energy; GO:0033512,L-lysine catabolic process to acetyl-CoA via saccharopine; GO:0019878,lysine biosynthetic process via aminoad…	Saccharopine dehydrogenase C-terminal domain
TRINITY_DN103050_c0_g1_i1.path1	2.09	2.53	4.25	0	0	0	12	18	25	0	0	0	0.012	-6.442	4.21511e-06	2.37985e-05	down	6C	239993348	239993710	-	TRINITY_DN103050_c0_g1_i1	--	--	--	--	--	--	--	--
TRINITY_DN103056_c0_g1_i1.path1	5.47	6.4	3.21	0	1.21	0.53	20	29	12	0	5	2	0.132	-2.924	0.000989498	0.00359865	down	1D	461254256	461254486	-	TRINITY_DN103056_c0_g1_i1	--	--	predicted protein [Hordeum vulgare subsp. vulgare]	RecName: Full=TLC domain-containing protein At5g14285 {ECO:0000305};	SubName: Full=Predicted protein {ECO:0000313|EMBL:BAJ84855.1, ECO:0000313|EnsemblPlants:HORVU7Hr1G091060.1};	--	GO:0016021,integral component of membrane	--
TRINITY_DN103056_c0_g1_i1.path2	14.77	18.11	14.7	2.97	0.24	0	54	82	55	10	1	0	0.069	-3.853	1.47975e-08	1.17025e-07	down	4A	340861338	340861568	-	TRINITY_DN103056_c0_g1_i1	--	--	predicted protein [Hordeum vulgare subsp. vulgare]	RecName: Full=TLC domain-containing protein At5g14285 {ECO:0000305};	SubName: Full=Predicted protein {ECO:0000313|EMBL:BAJ84855.1, ECO:0000313|EnsemblPlants:HORVU7Hr1G091060.1};	--	GO:0016021,integral component of membrane	--
TRINITY_DN10306_c0_g2_i1.path1	0	0.17	0.1	1.14	0.84	0.92	0	2	1	10	9	9	11.285	3.496	0.00386396	0.0120128	up	4D	256234840	256238360	+	TRINITY_DN10306_c0_g2_i1	--	--	--	--	--	--	--	--
TRINITY_DN103063_c0_g1_i1.path1	63.17	103.8	133.23	31.02	51.13	14.39	285	580	615	129	261	67	0.341	-1.55	2.86216e-05	0.000141235	down	4C	419556589	419556873	+	TRINITY_DN103063_c0_g1_i1	--	--	--	--	--	--	--	--
TRINITY_DN103071_c0_g1_i1.path1	0.9	0.81	0.29	0	0	0	9	10	3	0	0	0	0.03	-5.065	0.00244427	0.00804604	down	2A	397605964	397606828	-	TRINITY_DN103071_c0_g1_i1	--	K03164 DNA topoisomerase II [EC:5.99.1.3] | (RefSeq) LOC109783779; DNA topoisomerase 2-like (A)	DNA topoisomerase 2-like isoform X2 [Aegilops tauschii subsp. tauschii]	--	SubName: Full=DNA topoisomerase 2 {ECO:0000313|EMBL:EMS48024.1, ECO:0000313|EnsemblPlants:TRIUR3_35351-P1};	--	GO:0005524,ATP binding; GO:0003677,DNA binding; GO:0003918,DNA topoisomerase type II (ATP-hydrolyzing) activity; GO:0006265,DNA topological change	--
TRINITY_DN10309_c0_g1_i2.path1	0.71	0.25	0.5	3.41	2.15	1.77	14	6	10	62	48	36	5.531	2.468	2.28521e-06	1.34088e-05	up	4C	504844656	504849115	+	TRINITY_DN10309_c0_g1_i2	--	K08850 aurora kinase, other [EC:2.7.11.1] | (RefSeq) serine/threonine-protein kinase Aurora-3 (A)	Serine/threonine-protein kinase Aurora-3 [Triticum urartu]	--	SubName: Full=Serine/threonine-protein kinase Aurora-3 {ECO:0000313|EMBL:EMS56051.1, ECO:0000313|EnsemblPlants:TRIUR3_20762-P1};	--	GO:0005524,ATP binding; GO:0004674,protein serine/threonine kinase activity; GO:0007059,chromosome segregation; GO:0000226,microtubule cytoskeleton organization; GO:0000278,mitotic cell cycle; GO:0032465,regulation of cytokinesis	--
TRINITY_DN1031_c0_g2_i1.path1	0.11	0	0	0.93	0.47	0.52	1	0	0	8	5	5	19.686	4.299	0.00782664	0.0222708	up	5C	586131515	586132106	+	TRINITY_DN1031_c0_g2_i1	--	--	--	--	--	--	--	--
TRINITY_DN10311_c0_g2_i3.path1	5.34	4.94	4.03	1.93	2.13	1.88	333	381	257	111	150	121	0.457	-1.13	1.41182e-06	8.5596e-06	down	1D	137837516	137841540	-	TRINITY_DN10311_c0_g2_i3	--	--	--	--	--	--	--	--
TRINITY_DN10311_c0_g2_i3.path2	4.37	4.21	3.39	1.05	1.41	1.12	272	324	216	60	99	72	0.329	-1.604	4.2947e-10	4.07233e-09	down	1A	144671904	144675922	-	TRINITY_DN10311_c0_g2_i3	--	--	--	--	--	--	--	--
TRINITY_DN103112_c0_g1_i1.path1	148.91	169.47	150.37	15.95	14.54	14.38	1023	1442	1057	101	113	102	0.105	-3.249	2.15394e-55	2.64624e-53	down	1C	428064629	428065062	-	TRINITY_DN103112_c0_g1_i1	--	K15406 wax-ester synthase / diacylglycerol O-acyltransferase [EC:2.3.1.75 2.3.1.20] | (RefSeq) O-acyltransferase WSD1 (A)	O-acyltransferase WSD1-like isoform X2 [Aegilops tauschii subsp. tauschii]	RecName: Full=O-acyltransferase WSD1; AltName: Full=Diacylglycerol O-acyltransferase; Short=DGAT; EC=2.3.1.20; AltName: Full=Long-chain-alcohol O-fatty-acyltransferase; EC=2.3.1.75; AltName: Full=Wax synthase; Short=WS;	SubName: Full=Uncharacterized protein {ECO:0000313|EnsemblPlants:TRIAE_CS42_3AS_TGACv1_210771_AA0678590.4};	--	GO:0005783,endoplasmic reticulum; GO:0005789,endoplasmic reticulum membrane; GO:0016021,integral component of membrane; GO:0005886,plasma membrane; GO:0102966,arachidoyl-CoA:1-dodecanol O-acyltransferase activity; GO:0004144,diacylglycerol O-acyltransferase activity; GO:0047196,long-chain-alcohol O-fatty-acyltransferase activity; GO:0103095,wax ester synthase activity; GO:0019432,triglyceride bio…	Wax ester synthase-like Acyl-CoA acyltransferase domain
TRINITY_DN10312_c0_g1_i7.path1	0.29	0.48	0.54	0.64	0.95	0.89	13	27	25	27	49	42	2.108	1.076	0.0193435	0.048399	up	7A	401137030	401142010	-	TRINITY_DN10312_c0_g1_i7	--	K14413 beta-1,3-galactosyltransferase [EC:2.4.1.-] | (RefSeq) LOC109750253; beta-1,3-galactosyltransferase GALT1 (A)	Beta-1,3-galactosyltransferase 15 [Triticum urartu]	RecName: Full=Beta-1,3-galactosyltransferase GALT1 {ECO:0000305}; EC=2.4.1.- {ECO:0000269|PubMed:17630273}; AltName: Full=Beta-1,3-galactosyltransferase 15 {ECO:0000305}; AltName: Full=Galactosyltransferase 1 {ECO:0000303|PubMed:17630273};	SubName: Full=Beta-1,3-galactosyltransferase 15 {ECO:0000313|EMBL:EMS45685.1, ECO:0000313|EnsemblPlants:TRIUR3_33894-P1};	Galactosyltransferases	GO:0005794,Golgi apparatus; GO:0000139,Golgi membrane; GO:0016021,integral component of membrane; GO:0030246,carbohydrate binding; GO:0010488,UDP-galactose:N-glycan beta-1,3-galactosyltransferase activity; GO:0010493,Lewis a epitope biosynthetic process; GO:0006486,protein glycosylation	Galactosyltransferase
TRINITY_DN103122_c0_g1_i1.path1	2.3	1.71	2.94	0.19	0	0.34	13	12	17	1	0	2	0.083	-3.587	0.00161683	0.00557965	down	4C	524172978	524173334	+	TRINITY_DN103122_c0_g1_i1	--	--	protein trichome birefringence-like 33 [Aegilops tauschii subsp. tauschii]	RecName: Full=Protein trichome birefringence-like 32;	SubName: Full=Uncharacterized protein {ECO:0000313|EnsemblPlants:TRIAE_CS42_5DL_TGACv1_433096_AA1401750.3};	--	GO:0005794,Golgi apparatus; GO:0016021,integral component of membrane; GO:1990538,xylan O-acetyltransferase activity; GO:0009834,plant-type secondary cell wall biogenesis; GO:1990937,xylan acetylation	--
TRINITY_DN103138_c0_g1_i1.path1	1.19	1.44	1.16	0	0	0	4	6	4	0	0	0	0.046	-4.427	0.0164278	0.0422223	down	4C	527262177	527262389	-	TRINITY_DN103138_c0_g1_i1	--	--	--	--	SubName: Full=Uncharacterized protein {ECO:0000313|EnsemblPlants:TRIAE_CS42_6AL_TGACv1_471757_AA1513870.1};	--	--	--
TRINITY_DN10314_c0_g1_i1.path1	157.74	147.84	167.99	24.12	20.47	25.02	5583	6481	6084	787	820	914	0.162	-2.625	5.08538e-35	2.69844e-33	down	7D	560193	563390	+	TRINITY_DN10314_c0_g1_i1	--	--	PREDICTED: protein REVEILLE 2-like isoform X2 [Brachypodium distachyon]	--	SubName: Full=Uncharacterized protein {ECO:0000313|EMBL:KQK16640.1, ECO:0000313|EnsemblPlants:BRADI1G29680.2};	--	GO:0005634,nucleus; GO:0003677,DNA binding; GO:0006355,regulation of transcription, DNA-templated; GO:0006351,transcription, DNA-templated	--
TRINITY_DN10314_c0_g1_i1.path2	44.39	28.8	18.56	3.76	1.91	0	1564	1257	669	122	76	0	0.065	-3.948	0.0169047	0.0432725	down	Chr00	142104163	142107356	+	TRINITY_DN10314_c0_g1_i1	--	--	PREDICTED: protein REVEILLE 2-like isoform X2 [Brachypodium distachyon]	--	SubName: Full=Uncharacterized protein {ECO:0000313|EMBL:KQK16640.1, ECO:0000313|EnsemblPlants:BRADI1G29680.2};	--	GO:0005634,nucleus; GO:0003677,DNA binding; GO:0006355,regulation of transcription, DNA-templated; GO:0006351,transcription, DNA-templated	--
TRINITY_DN10314_c1_g1_i1.path1	22.18	16.09	12.1	3.31	1.85	2.8	138	124	77	19	13	18	0.174	-2.526	5.62706e-10	5.26124e-09	down	7D	560930	561322	-	TRINITY_DN10314_c1_g1_i1	--	--	--	--	--	--	--	--
TRINITY_DN103142_c0_g1_i1.path1	0.29	0	0	37.3	61.54	66.61	1	0	0	117	237	234	630.628	9.301	3.24545e-14	4.62767e-13	up	7D	388907209	388907423	-	TRINITY_DN103142_c0_g1_i1	--	--	uncharacterized protein LOC109738133 [Aegilops tauschii subsp. tauschii]	--	SubName: Full=Uncharacterized protein {ECO:0000313|EnsemblPlants:TRIAE_CS42_7BL_TGACv1_579821_AA1910330.1};	--	GO:0016021,integral component of membrane; GO:0030246,carbohydrate binding	--
TRINITY_DN10315_c0_g2_i1.path1	1.88	1.47	1.15	0.57	0.21	0.46	32	31	20	9	4	8	0.301	-1.731	0.00542714	0.0161682	down	3C	4462300	4463374	-	TRINITY_DN10315_c0_g2_i1	--	--	--	--	--	--	--	--
TRINITY_DN10315_c0_g3_i9.path1	0	0	0	0.33	0.4	0.42	0	0	0	31	47	45	257.691	8.009	3.36979e-10	3.23118e-09	up	1D	292241422	292248235	-	TRINITY_DN10315_c0_g3_i9	--	K19027 zinc finger FYVE domain-containing protein 26 | (RefSeq) uncharacterized protein LOC103652610 isoform X1 (A)	retrotransposon protein, putative, unclassified [Oryza sativa Japonica Group]	--	SubName: Full=Uncharacterized protein {ECO:0000313|EnsemblPlants:TRIAE_CS42_6BL_TGACv1_503610_AA1628160.1};	FOG: Reverse transcriptase	--	Reverse transcriptase (RNA-dependent DNA polymerase)
TRINITY_DN103151_c0_g1_i1.path1	2.24	0.57	1.51	0	0	0	16	5	11	0	0	0	0.019	-5.715	0.000211303	0.000887976	down	2C	539629134	539629584	+	TRINITY_DN103151_c0_g1_i1	--	K19861 benzyl alcohol O-benzoyltransferase [EC:2.3.1.196 2.3.1.232] | (RefSeq) LOC109745430; benzyl alcohol O-benzoyltransferase-like (A)	benzyl alcohol O-benzoyltransferase-like [Aegilops tauschii subsp. tauschii]	RecName: Full=(Z)-3-hexen-1-ol acetyltransferase; EC=2.3.1.195;	SubName: Full=Uncharacterized protein {ECO:0000313|EnsemblPlants:HORVU3Hr1G001030.1};	--	GO:0102165,(Z)-3-hexen-1-ol acetyltransferase activity; GO:0010327,acetyl CoA:(Z)-3-hexen-1-ol acetyltransferase activity; GO:0010597,green leaf volatile biosynthetic process	Transferase family
TRINITY_DN103156_c0_g1_i1.path1	2.17	0.19	0.94	0	0	0	9	1	4	0	0	0	0.043	-4.549	0.0172385	0.0439926	down	7C	205600206	205600467	+	TRINITY_DN103156_c0_g1_i1	--	--	--	--	--	--	--	--
TRINITY_DN10316_c0_g1_i2.path1	4.12	3.69	2.38	1.82	1.52	0.81	201	223	119	82	84	41	0.443	-1.176	0.000301602	0.00122607	down	6A	172937117	172940200	+	TRINITY_DN10316_c0_g1_i2	--	--	--	--	--	--	--	--
TRINITY_DN103165_c0_g1_i1.path1	2.86	1.49	2.2	0.22	0.18	0.4	14	9	11	1	1	2	0.135	-2.894	0.00767381	0.021884	down	3C	50155755	50156233	-	TRINITY_DN103165_c0_g1_i1	--	--	--	--	--	--	--	--
TRINITY_DN103166_c0_g1_i1.path1	4.81	5.3	4.56	12.66	13.54	13.57	33	45	32	80	105	96	2.99	1.58	1.15367e-06	7.09049e-06	up	4C	482916801	482917233	+	TRINITY_DN103166_c0_g1_i1	--	--	--	--	--	--	--	--
TRINITY_DN10317_c0_g2_i2.path1	7.7	6.14	5.44	0.83	1.73	1.2	354	350	256	35	90	57	0.215	-2.22	2.21847e-13	2.92835e-12	down	5D	320280489	320284240	-	TRINITY_DN10317_c0_g2_i2	--	--	predicted protein [Hordeum vulgare subsp. vulgare]	--	SubName: Full=Uncharacterized protein {ECO:0000313|EnsemblPlants:HORVU5Hr1G080980.2};	--	GO:0003824,catalytic activity	--
TRINITY_DN10317_c0_g2_i2.path2	1.96	1.32	0.91	0.54	0.9	0.36	90	75	43	23	47	17	0.469	-1.093	0.01193	0.0320667	down	5A	352840921	352844739	-	TRINITY_DN10317_c0_g2_i2	--	--	predicted protein [Hordeum vulgare subsp. vulgare]	--	SubName: Full=Uncharacterized protein {ECO:0000313|EnsemblPlants:HORVU5Hr1G080980.2};	--	GO:0003824,catalytic activity	--
TRINITY_DN10317_c0_g3_i1.path1	12.96	5.9	7.14	2.05	1.87	0	55	31	31	8	9	0	0.159	-2.648	0.000118103	0.000519869	down	4C	47899781	47900048	+	TRINITY_DN10317_c0_g3_i1	--	--	--	--	--	--	--	--
TRINITY_DN10318_c0_g1_i9.path1	8.47	7.12	6.25	1.93	3.24	1.46	462	481	349	97	200	82	0.329	-1.605	1.16503e-08	9.32478e-08	down	2A	419549041	419553322	-	TRINITY_DN10318_c0_g1_i9	--	--	--	--	--	--	--	--
TRINITY_DN103190_c0_g1_i1.path1	2.26	2.02	0.74	0.14	0.44	0.24	18	20	6	1	4	2	0.184	-2.44	0.00949273	0.026346	down	6C	522314188	522315565	-	TRINITY_DN103190_c0_g1_i1	--	--	--	--	--	--	--	--
TRINITY_DN103192_c0_g1_i1.path1	5.76	15.45	5.63	63.85	97.11	61.4	28	93	28	286	534	308	9.101	3.186	5.24689e-20	1.1709e-18	up	3D	414898737	414899043	-	TRINITY_DN103192_c0_g1_i1	--	--	--	--	--	--	--	--
TRINITY_DN103206_c0_g1_i1.path1	13.13	6.36	8.18	4.98	4.06	2.7	80	48	51	28	28	17	0.459	-1.122	0.0105476	0.0288564	down	1D	471388787	471389171	-	TRINITY_DN103206_c0_g1_i1	--	--	--	--	--	--	--	--
TRINITY_DN103206_c0_g1_i1.path2	4.43	3.71	2.41	0.89	1.02	0.16	27	28	15	5	7	1	0.212	-2.241	0.00220883	0.00735526	down	4C	357200545	357200929	-	TRINITY_DN103206_c0_g1_i1	--	--	--	--	--	--	--	--
TRINITY_DN103208_c0_g1_i1.path1	0	0.22	0	2.67	0.97	0.79	0	1	0	9	4	3	17.544	4.133	0.0141812	0.0371714	up	2A	15271547	15271777	-	TRINITY_DN103208_c0_g1_i1	--	--	--	--	--	--	--	--
TRINITY_DN103208_c0_g1_i1.path2	0	0	0	0.59	1.45	1.59	0	0	0	2	6	6	29.124	4.864	0.00701757	0.0202194	up	2D	295382131	295382361	+	TRINITY_DN103208_c0_g1_i1	--	--	--	--	--	--	--	--
TRINITY_DN10322_c1_g1_i1.path1	7.11	8.13	5.98	3.26	3.04	2.14	331	469	285	140	160	103	0.435	-1.202	3.13706e-07	2.08969e-06	down	5A	63094354	63097295	-	TRINITY_DN10322_c1_g1_i1	--	--	--	--	--	--	--	--
TRINITY_DN10322_c1_g1_i1.path2	8.88	7.88	7.76	1.09	0.97	0.69	414	455	370	47	51	33	0.122	-3.038	4.10727e-31	1.79068e-29	down	7D	12564453	12567396	-	TRINITY_DN10322_c1_g1_i1	--	--	--	--	--	--	--	--
TRINITY_DN10322_c1_g3_i1.path1	3.19	2.72	2.85	0.3	0.64	0.18	35	37	32	3	8	2	0.14	-2.834	1.26857e-05	6.64728e-05	down	1C	272963687	272964474	-	TRINITY_DN10322_c1_g3_i1	--	--	--	--	--	--	--	--
TRINITY_DN10322_c2_g2_i1.path1	3.2	3.76	3.6	1.49	1.52	1.55	112	163	129	48	60	56	0.475	-1.075	0.000218096	0.000913434	down	3A	10271612	10282252	-	TRINITY_DN10322_c2_g2_i1	--	--	--	--	--	--	--	--
TRINITY_DN10322_c2_g2_i1.path2	4.59	5.81	5.47	1.41	1.65	1.58	155	243	189	44	63	55	0.322	-1.634	5.14675e-09	4.32066e-08	down	3D	350052401	350127255	+	TRINITY_DN10322_c2_g2_i1	--	--	--	--	--	--	--	--
TRINITY_DN10322_c3_g1_i1.path2	0.3	1.92	0.58	6.14	6.06	4.33	1	8	2	19	23	15	6.302	2.656	0.000693745	0.00261167	up	4A	21506102	21506552	+	TRINITY_DN10322_c3_g1_i1	--	--	--	--	--	--	--	--
TRINITY_DN103220_c0_g1_i1.path1	14.04	11.33	8.34	1.65	2.68	2.39	74	74	45	8	16	13	0.221	-2.176	1.92261e-06	1.14205e-05	down	2C	190441115	190442038	-	TRINITY_DN103220_c0_g1_i1	--	--	--	--	--	--	--	--
TRINITY_DN103228_c0_g1_i1.path1	47.05	57.07	46.63	7.67	16.4	13.48	213	320	216	32	84	63	0.276	-1.855	1.44236e-09	1.29091e-08	down	6A	292127979	292128264	+	TRINITY_DN103228_c0_g1_i1	--	--	--	--	SubName: Full=Uncharacterized protein {ECO:0000313|EnsemblPlants:HORVU6Hr1G053730.30};	--	--	--
TRINITY_DN103232_c0_g1_i1.path1	2.59	2.85	1.38	0	0.83	0	11	15	6	0	4	0	0.138	-2.855	0.0192133	0.0481162	down	4C	14277750	14278109	-	TRINITY_DN103232_c0_g1_i1	--	--	--	--	--	--	--	--
TRINITY_DN103233_c0_g1_i1.path1	14.82	11.97	11.25	30.6	27.34	43.92	103	103	80	196	215	315	2.998	1.584	2.31487e-07	1.56917e-06	up	4A	203353864	203354302	+	TRINITY_DN103233_c0_g1_i1	--	--	--	--	--	--	--	--
TRINITY_DN103239_c0_g1_i1.path1	58.42	59.44	59.8	18.35	22.42	18.05	442	557	463	128	192	141	0.363	-1.462	1.55879e-11	1.71932e-10	down	5C	182177811	182178288	-	TRINITY_DN103239_c0_g1_i1	--	--	--	--	--	--	--	--
TRINITY_DN103245_c0_g1_i1.path2	10.28	17.79	8.85	88.73	91.1	158.94	42	90	37	334	421	670	10.402	3.379	1.67972e-22	4.43881e-21	up	7D	396491183	396491440	-	TRINITY_DN103245_c0_g1_i1	--	--	--	--	--	--	--	--
TRINITY_DN103246_c0_g1_i1.path2	8.01	8.44	7.17	1.45	2.56	4.53	36	47	33	6	13	21	0.408	-1.294	0.0151423	0.0393428	down	1D	450134689	450134972	+	TRINITY_DN103246_c0_g1_i1	--	--	--	--	--	--	--	--
TRINITY_DN10325_c0_g1_i1.path1	3.48	3.25	2.76	1.4	1.07	0.64	184	213	149	68	64	35	0.354	-1.496	9.24667e-07	5.76061e-06	down	5D	188073255	188076759	+	TRINITY_DN10325_c0_g1_i1	--	K02872 large subunit ribosomal protein L13Ae | (RefSeq) 60S ribosomal protein L13a-4 (A)	PREDICTED: 60S ribosomal protein L13a-4 [Brachypodium distachyon]	RecName: Full=60S ribosomal protein L13a-2;	SubName: Full=Uncharacterized protein {ECO:0000313|EnsemblPlants:OGLUM03G34300.1};	60S ribosomal protein L13a	GO:0005829,cytosol; GO:0022625,cytosolic large ribosomal subunit; GO:0022626,cytosolic ribosome; GO:0016020,membrane; GO:0009506,plasmodesma; GO:0042788,polysomal ribosome; GO:0003729,mRNA binding; GO:0003735,structural constituent of ribosome; GO:0006412,translation	--
TRINITY_DN103251_c0_g1_i1.path2	0	1.43	0.43	7.46	2.74	4.94	0	8	2	31	14	23	8.723	3.125	0.000173735	0.000741987	up	3A	385965109	385965393	+	TRINITY_DN103251_c0_g1_i1	--	--	unnamed protein product [Triticum aestivum]	--	SubName: Full=Uncharacterized protein {ECO:0000313|EMBL:CDM81161.1};	--	GO:0016021,integral component of membrane; GO:0005524,ATP binding; GO:0004674,protein serine/threonine kinase activity	--
TRINITY_DN10326_c0_g1_i2.path1	3.27	3.15	3.16	0.25	0.47	0.36	98	117	97	7	16	11	0.125	-3.002	2.50839e-13	3.29516e-12	down	6D	24940186	24945136	-	TRINITY_DN10326_c0_g1_i2	--	K04733 interleukin-1 receptor-associated kinase 4 [EC:2.7.11.1] | (RefSeq) probable L-type lectin-domain containing receptor kinase S.5 (A)	PREDICTED: probable L-type lectin-domain containing receptor kinase S.5 [Brachypodium distachyon]	RecName: Full=Probable L-type lectin-domain containing receptor kinase S.5; Short=LecRK-S.5; EC=2.7.11.1; Flags: Precursor;	SubName: Full=Uncharacterized protein {ECO:0000313|EMBL:KQK20348.1};	--	GO:0016021,integral component of membrane; GO:0005886,plasma membrane; GO:0005524,ATP binding; GO:0030246,carbohydrate binding; GO:0004674,protein serine/threonine kinase activity	--
TRINITY_DN10326_c0_g1_i2.path2	2.34	2.37	2.19	0.22	0.35	0.23	70	88	67	6	12	7	0.128	-2.969	1.29885e-10	1.30129e-09	down	6A	57803646	57808601	-	TRINITY_DN10326_c0_g1_i2	--	--	--	--	--	--	--	--
TRINITY_DN10326_c1_g1_i3.path1	8.2	7.61	8.78	1.64	2.45	2.14	260	299	285	48	88	70	0.279	-1.843	1.40065e-11	1.54966e-10	down	2D	10940976	10943786	+	TRINITY_DN10326_c1_g1_i3	--	K03671 thioredoxin 1 | (RefSeq) thioredoxin M3, chloroplastic-like (A)	predicted protein [Hordeum vulgare subsp. vulgare]	RecName: Full=Thioredoxin M3, chloroplastic; Short=OsTrxm3; AltName: Full=OsTrx11; Flags: Precursor;	SubName: Full=Uncharacterized protein {ECO:0000313|EnsemblPlants:HORVU2Hr1G075240.6};	Thioredoxin-like protein	GO:0009507,chloroplast; GO:0005737,cytoplasm; GO:0008047,enzyme activator activity; GO:0016671,oxidoreductase activity, acting on a sulfur group of donors, disulfide as acceptor; GO:0015035,protein disulfide oxidoreductase activity; GO:0047134,protein-disulfide reductase activity; GO:0004791,thioredoxin-disulfide reductase activity; GO:0045454,cell redox homeostasis; GO:0034599,cellular response …	Thioredoxin
TRINITY_DN10326_c1_g1_i3.path2	6.84	6.08	6.53	1.3	2.26	2.81	217	239	212	38	81	92	0.365	-1.454	8.4504e-06	4.54644e-05	down	2A	312676832	312680636	-	TRINITY_DN10326_c1_g1_i3	--	K03671 thioredoxin 1 | (RefSeq) thioredoxin M3, chloroplastic-like (A)	predicted protein [Hordeum vulgare subsp. vulgare]	RecName: Full=Thioredoxin M3, chloroplastic; Short=OsTrxm3; AltName: Full=OsTrx11; Flags: Precursor;	SubName: Full=Uncharacterized protein {ECO:0000313|EnsemblPlants:HORVU2Hr1G075240.6};	Thioredoxin-like protein	GO:0009507,chloroplast; GO:0005737,cytoplasm; GO:0008047,enzyme activator activity; GO:0016671,oxidoreductase activity, acting on a sulfur group of donors, disulfide as acceptor; GO:0015035,protein disulfide oxidoreductase activity; GO:0047134,protein-disulfide reductase activity; GO:0004791,thioredoxin-disulfide reductase activity; GO:0045454,cell redox homeostasis; GO:0034599,cellular response …	Thioredoxin
TRINITY_DN103260_c0_g1_i1.path1	0.31	0	0	1.36	1.94	2.74	1	0	0	4	7	9	21.698	4.439	0.00526559	0.0157479	up	6D	276422353	276422553	+	TRINITY_DN103260_c0_g1_i1	--	--	hypothetical protein OsJ_08617 [Oryza sativa Japonica Group]	--	SubName: Full=Uncharacterized protein {ECO:0000313|EMBL:EEE57920.1};	--	--	--
TRINITY_DN10327_c0_g1_i4.path1	4.5	4.72	4.03	1.21	0.97	0.94	177	230	162	44	43	38	0.258	-1.957	6.29285e-12	7.21435e-11	down	3D	376640378	376644745	+	TRINITY_DN10327_c0_g1_i4	--	K05349 beta-glucosidase [EC:3.2.1.21] | (RefSeq) beta-glucosidase BoGH3B-like (A)	unnamed protein product [Triticum aestivum]	RecName: Full=Beta-xylosidase/alpha-L-arabinofuranosidase 2 {ECO:0000303|PubMed:17615411, ECO:0000312|EMBL:ABQ45228.1}; AltName: Full=Xylan 1,4-beta-xylosidase/Alpha-L-arabinofuranosidase 2; Short=MsXyl2 {ECO:0000303|PubMed:17615411}; Includes: RecName: Full=Beta-xylosidase; EC=3.2.1.37; AltName: Full=1,4-beta-D-xylan xylohydrolase {ECO:0000250|UniProtKB:P48792}; AltName: Full=Xylan 1,4-beta-xylo…	SubName: Full=Uncharacterized protein {ECO:0000313|EMBL:CDM84404.1};	--	GO:0005578,NA; GO:0046556,alpha-L-arabinofuranosidase activity; GO:0009044,xylan 1,4-beta-xylosidase activity; GO:0045493,xylan catabolic process	Glycosyl hydrolase family 3 N terminal domain
TRINITY_DN103273_c0_g1_i1.path1	5.98	5.37	4.98	12.27	14.1	12.89	27	30	23	51	72	60	2.649	1.405	0.000169166	0.000724238	up	2A	318011802	318012086	-	TRINITY_DN103273_c0_g1_i1	--	--	--	--	--	--	--	--
TRINITY_DN103277_c0_g1_i1.path1	0.57	0.69	1.12	5.27	3.54	3.88	2	3	4	17	14	14	5.842	2.546	0.0017829	0.00608914	up	2D	379986254	379986474	+	TRINITY_DN103277_c0_g1_i1	--	--	--	--	--	--	--	--
TRINITY_DN10328_c0_g2_i1.path1	7.39	5.73	6	1.56	1.86	1.64	401	385	333	78	114	92	0.291	-1.783	7.72356e-13	9.67263e-12	down	3D	441279294	441283385	-	TRINITY_DN10328_c0_g2_i1	--	--	--	--	--	--	--	--
TRINITY_DN103284_c0_g1_i1.path1	0	0	0	2.79	2.72	2.24	0	0	0	10	12	9	64.719	6.016	4.84811e-05	0.000229633	up	7D	326759017	326759262	+	TRINITY_DN103284_c0_g1_i1	--	--	--	--	--	--	--	--
TRINITY_DN10329_c0_g1_i3.path1	21.2	17.3	17.16	6.46	7.9	5.02	548	554	454	154	231	134	0.379	-1.4	1.48036e-09	1.32327e-08	down	4C	80254051	80256903	-	TRINITY_DN10329_c0_g1_i3	--	--	--	--	--	--	--	--
TRINITY_DN103298_c0_g1_i1.path2	0.21	0.34	0.62	2.08	1.88	1.65	1	2	3	9	10	8	5.194	2.377	0.018783	0.0472339	up	1D	469848174	469848470	-	TRINITY_DN103298_c0_g1_i1	--	--	--	--	--	--	--	--
TRINITY_DN1033_c0_g1_i2.path1	12.69	14.29	14.01	53.52	41.3	70.44	386	538	436	1500	1421	2211	4.513	2.174	1.94064e-16	3.33498e-15	up	7C	38356190	38360319	-	TRINITY_DN1033_c0_g1_i2	--	K01736 chorismate synthase [EC:4.2.3.5] | (RefSeq) LOC109766559; chorismate synthase 2, chloroplastic (A)	chorismate synthase [Hordeum vulgare subsp. vulgare]	RecName: Full=Chorismate synthase 1, chloroplastic; EC=4.2.3.5; AltName: Full=5-enolpyruvylshikimate-3-phosphate phospholyase 1; Flags: Precursor;	RecName: Full=Chorismate synthase {ECO:0000256|RuleBase:RU000605}; EC=4.2.3.5 {ECO:0000256|RuleBase:RU000605};	Chorismate synthase	GO:0009507,chloroplast; GO:0005829,cytosol; GO:0004107,chorismate synthase activity; GO:0010181,FMN binding; GO:0009073,aromatic amino acid family biosynthetic process; GO:0009423,chorismate biosynthetic process	Chorismate synthase
TRINITY_DN1033_c0_g1_i2.path2	8.96	11.56	10.31	24.01	22.3	31.92	271	433	319	669	763	996	2.833	1.503	2.268e-09	1.98391e-08	up	5A	21838707	21842880	-	TRINITY_DN1033_c0_g1_i2	--	K01736 chorismate synthase [EC:4.2.3.5] | (RefSeq) LOC109766559; chorismate synthase 2, chloroplastic (A)	chorismate synthase [Hordeum vulgare subsp. vulgare]	RecName: Full=Chorismate synthase 1, chloroplastic; EC=4.2.3.5; AltName: Full=5-enolpyruvylshikimate-3-phosphate phospholyase 1; Flags: Precursor;	RecName: Full=Chorismate synthase {ECO:0000256|RuleBase:RU000605}; EC=4.2.3.5 {ECO:0000256|RuleBase:RU000605};	Chorismate synthase	GO:0009507,chloroplast; GO:0005829,cytosol; GO:0004107,chorismate synthase activity; GO:0010181,FMN binding; GO:0009073,aromatic amino acid family biosynthetic process; GO:0009423,chorismate biosynthetic process	Chorismate synthase
TRINITY_DN10330_c0_g1_i1.path1	1.46	1.8	1.25	0.46	0.42	0.51	86	131	75	25	28	31	0.342	-1.547	1.11143e-05	5.87577e-05	down	1C	27713846	27720738	+	TRINITY_DN10330_c0_g1_i1	--	K13457 disease resistance protein RPM1 | (RefSeq) disease resistance protein RPM1-like (A)	PREDICTED: disease resistance protein RPP13-like [Brachypodium distachyon]	RecName: Full=Disease resistance protein RPP13; AltName: Full=Resistance to Peronospora parasitica protein 13;	SubName: Full=Uncharacterized protein {ECO:0000313|EMBL:KQJ87182.1, ECO:0000313|EnsemblPlants:BRADI4G09597.1};	Apoptotic ATPase	GO:0005737,cytoplasm; GO:0005886,plasma membrane; GO:0043531,ADP binding; GO:0005524,ATP binding; GO:0009814,defense response, incompatible interaction; GO:0009626,plant-type hypersensitive response; GO:0007165,signal transduction	NB-ARC domain
TRINITY_DN103301_c0_g1_i1.path1	8.19	5.88	5.34	81.58	76.74	82.02	45	40	30	413	477	465	13.723	3.779	8.0502e-44	6.32637e-42	up	4D	205911874	205912220	+	TRINITY_DN103301_c0_g1_i1	--	--	--	--	--	--	--	--
TRINITY_DN103306_c0_g1_i1.path2	18.76	19.42	20.68	34.79	41.09	46.76	117	150	132	200	290	301	2.308	1.207	3.90013e-06	2.2122e-05	up	6A	229304625	229319906	+	TRINITY_DN103306_c0_g1_i1	--	--	protein FAR1-RELATED SEQUENCE 5-like [Aegilops tauschii subsp. tauschii]	--	SubName: Full=Uncharacterized protein {ECO:0000313|EnsemblPlants:TRIAE_CS42_5AL_TGACv1_375991_AA1230190.1};	--	GO:0006355,regulation of transcription, DNA-templated	--
TRINITY_DN103326_c0_g1_i1.path1	10.88	10.93	10.77	176.11	197.39	129.61	82	102	83	1223	1683	1008	16.807	4.071	6.38708e-78	1.88824e-75	up	6A	336238522	336238997	+	TRINITY_DN103326_c0_g1_i1	--	K03521 electron transfer flavoprotein beta subunit | (RefSeq) LOC109785963; electron transfer flavoprotein subunit beta, mitochondrial (A)	electron transfer flavoprotein subunit beta, mitochondrial [Aegilops tauschii subsp. tauschii]	--	SubName: Full=Uncharacterized protein {ECO:0000313|EnsemblPlants:TRIAE_CS42_6BL_TGACv1_501430_AA1617460.2};	--	GO:0009055,electron transfer activity	--
TRINITY_DN103331_c0_g1_i1.path1	14.71	10.83	12.05	1.41	3.44	0.84	68	62	57	6	18	4	0.165	-2.598	4.63246e-07	3.01276e-06	down	1A	440246892	440247183	+	TRINITY_DN103331_c0_g1_i1	--	--	--	--	--	--	--	--
TRINITY_DN103335_c0_g1_i1.path1	2.74	1.06	1.82	0.36	0.39	0.21	25	12	17	3	4	2	0.185	-2.438	0.00313933	0.0100233	down	3C	120744170	120744746	-	TRINITY_DN103335_c0_g1_i1	--	--	--	--	--	--	--	--
TRINITY_DN103337_c0_g1_i1.path1	11.12	15.22	13.07	25.7	24.21	25.92	69	117	83	147	170	166	2.123	1.086	5.55487e-05	0.000260406	up	6A	176633722	176634113	+	TRINITY_DN103337_c0_g1_i1	--	--	--	--	--	--	--	--
TRINITY_DN10334_c0_g1_i5.path1	3.82	5.59	2.73	0.88	1.71	0.44	85	154	62	18	43	10	0.272	-1.881	2.36299e-05	0.00011834	down	7C	634561119	634562755	-	TRINITY_DN10334_c0_g1_i5	--	--	--	--	--	--	--	--
TRINITY_DN103345_c0_g1_i1.path1	14.93	19.1	15.49	39.38	45.07	50.08	65	103	69	158	222	225	3.013	1.591	7.22118e-09	5.94424e-08	up	1C	29280413	29280687	-	TRINITY_DN103345_c0_g1_i1	--	--	--	--	--	--	--	--
TRINITY_DN103355_c0_g1_i1.path1	0.12	0	0.12	7.46	3.2	7.71	1	0	1	57	30	66	91.766	6.52	8.8587e-09	7.20558e-08	up	3D	287050980	287051503	+	TRINITY_DN103355_c0_g1_i1	--	--	unnamed protein product [Triticum aestivum]	--	SubName: Full=Uncharacterized protein {ECO:0000313|EMBL:CDM82603.1, ECO:0000313|EnsemblPlants:TRIAE_CS42_3B_TGACv1_222108_AA0757430.1};	--	GO:0005634,nucleus; GO:0003700,DNA-binding transcription factor activity; GO:0043565,sequence-specific DNA binding; GO:0006351,transcription, DNA-templated	--
TRINITY_DN103355_c0_g1_i1.path2	0	0	0	17.66	11.83	22.19	0	0	0	135	111	190	940.641	9.878	1.2342e-15	1.9916e-14	up	3A	77248887	77249410	-	TRINITY_DN103355_c0_g1_i1	--	--	unnamed protein product [Triticum aestivum]	--	SubName: Full=Uncharacterized protein {ECO:0000313|EMBL:CDM82603.1, ECO:0000313|EnsemblPlants:TRIAE_CS42_3B_TGACv1_222108_AA0757430.1};	--	GO:0005634,nucleus; GO:0003700,DNA-binding transcription factor activity; GO:0043565,sequence-specific DNA binding; GO:0006351,transcription, DNA-templated	--
TRINITY_DN103356_c0_g1_i1.path1	8.58	8.82	5.72	41.46	29.46	48.17	44	56	30	196	171	255	5.766	2.528	1.60726e-14	2.36232e-13	up	5C	527745481	527747776	+	TRINITY_DN103356_c0_g1_i1	--	--	Cellulose synthase-like protein E6 [Dichanthelium oligosanthes]	RecName: Full=Cellulose synthase-like protein E1; EC=2.4.1.-; AltName: Full=OsCslE1;	SubName: Full=Cellulose synthase-like protein E6 {ECO:0000313|EMBL:OEL33359.1};	--	GO:0005794,Golgi apparatus; GO:0000139,Golgi membrane; GO:0016021,integral component of membrane; GO:0005886,plasma membrane; GO:0016760,cellulose synthase (UDP-forming) activity; GO:0016759,cellulose synthase activity; GO:0071555,cell wall organization; GO:0030244,cellulose biosynthetic process; GO:0009833,plant-type primary cell wall biogenesis	--
TRINITY_DN103359_c0_g1_i1.path1	0	0.16	0	7.45	12.14	4.75	0	1	0	35	70	25	134.649	7.073	3.67886e-08	2.77646e-07	up	3C	578567101	578637268	-	TRINITY_DN103359_c0_g1_i1	--	K22845 phlorizin synthase [EC:2.4.1.357] | (RefSeq) LOC109780444; anthocyanidin 5,3-O-glucosyltransferase-like (A)	anthocyanidin 5,3-O-glucosyltransferase-like [Aegilops tauschii subsp. tauschii]	RecName: Full=UDP-glycosyltransferase 88F3 {ECO:0000303|Ref.1}; EC=2.4.1.- {ECO:0000305}; AltName: Full=UDP-glucose:chalcone 2'-O-glucosyltransferase {ECO:0000305};	RecName: Full=Glycosyltransferase {ECO:0000256|RuleBase:RU362057}; EC=2.4.1.- {ECO:0000256|RuleBase:RU362057};	UDP-glucuronosyl and UDP-glucosyl transferase	GO:0016758,transferase activity, transferring hexosyl groups; GO:0008152,metabolic process	--
TRINITY_DN10337_c0_g1_i8.path2	8.95	10.87	6.75	3.36	4.85	2.49	101	152	78	35	62	29	0.441	-1.181	0.000539197	0.00208067	down	5A	26092577	26093415	+	TRINITY_DN10337_c0_g1_i8	--	--	--	--	--	--	--	--
TRINITY_DN10337_c0_g1_i8.path4	3.76	3.69	2.19	1.07	1.35	1.48	42	51	25	11	17	17	0.449	-1.154	0.0177138	0.0449936	down	1A	362610266	362611096	+	TRINITY_DN10337_c0_g1_i8	--	--	--	--	--	--	--	--
TRINITY_DN103372_c0_g1_i1.path1	0.56	3.82	2.72	436.92	148.05	171.75	2	17	10	1447	602	637	116.089	6.859	2.17233e-18	4.35144e-17	up	2A	413844398	413844789	+	TRINITY_DN103372_c0_g1_i1	--	--	--	--	--	--	--	--
TRINITY_DN103377_c0_g1_i1.path1	2.67	2.84	5.91	38.77	46.63	49.89	19	25	43	254	375	366	13.053	3.706	3.23967e-27	1.14365e-25	up	7C	576065083	576065531	+	TRINITY_DN103377_c0_g1_i1	--	K00469 inositol oxygenase [EC:1.13.99.1] | (RefSeq) probable inositol oxygenase (A)	hypothetical protein SETIT_006965mg [Setaria italica]	RecName: Full=Probable inositol oxygenase; EC=1.13.99.1; AltName: Full=Myo-inositol oxygenase; Short=MI oxygenase;	SubName: Full=Uncharacterized protein {ECO:0000313|EMBL:KQL11730.1, ECO:0000313|EnsemblPlants:Si007282m};	--	GO:0005737,cytoplasm; GO:0050113,inositol oxygenase activity; GO:0005506,iron ion binding; GO:0019310,inositol catabolic process; GO:0019853,L-ascorbic acid biosynthetic process	Myo-inositol oxygenase
TRINITY_DN103384_c0_g1_i1.path1	3.56	2.21	1.6	0.3	0	0	13	10	6	1	0	0	0.043	-4.542	0.00280545	0.00908531	down	4A	200012042	200012272	-	TRINITY_DN103384_c0_g1_i1	--	--	--	--	--	--	--	--
TRINITY_DN103398_c0_g1_i1.path2	2.81	4.72	4.34	12.69	18.82	12.01	12	25	19	50	91	53	3.994	1.998	1.39666e-06	8.47265e-06	up	6A	144068771	144069040	-	TRINITY_DN103398_c0_g1_i1	--	--	--	--	--	--	--	--
TRINITY_DN103399_c0_g1_i1.path1	3.4	1.45	0.98	0.22	0.18	0	17	9	5	1	1	0	0.073	-3.784	0.00636929	0.0185955	down	5A	136203758	136204073	+	TRINITY_DN103399_c0_g1_i1	--	K12818 ATP-dependent RNA helicase DHX8/PRP22 [EC:3.6.4.13] | (RefSeq) LOC109781846; pre-mRNA-splicing factor ATP-dependent RNA helicase DEAH10 (A)	pre-mRNA-splicing factor ATP-dependent RNA helicase DEAH10 [Aegilops tauschii subsp. tauschii]	RecName: Full=Pre-mRNA-splicing factor ATP-dependent RNA helicase DEAH10; EC=3.6.4.13; AltName: Full=DEAH RNA helicase homolog PRP22 {ECO:0000303|PubMed:23771891}; AltName: Full=Protein ROOT INITIATION DEFECTIVE 1 {ECO:0000303|PubMed:23771891};	SubName: Full=ATP-dependent RNA helicase DHX8 {ECO:0000313|EMBL:EMT25274.1, ECO:0000313|EnsemblPlants:EMT25274};	DEAH-box RNA helicase	GO:0005737,cytoplasm; GO:0005730,nucleolus; GO:0005634,nucleus; GO:0005681,spliceosomal complex; GO:0005524,ATP binding; GO:0004004,ATP-dependent RNA helicase activity; GO:0003723,RNA binding; GO:0006397,mRNA processing; GO:0043484,regulation of RNA splicing; GO:0006396,RNA processing; GO:0008380,RNA splicing	--
TRINITY_DN1034_c0_g1_i1.path1	21.89	24.78	18.71	4.58	5.07	2.72	607	851	531	117	159	78	0.206	-2.28	2.14965e-21	5.29033e-20	down	5A	98514843	98517670	-	TRINITY_DN1034_c0_g1_i1	--	K08991 crossover junction endonuclease MUS81 [EC:3.1.22.-] | (RefSeq) hypothetical protein (A)	suppressor protein SRP40 [Aegilops tauschii subsp. tauschii]	--	SubName: Full=Uncharacterized protein {ECO:0000313|EnsemblPlants:TRIAE_CS42_5AS_TGACv1_393298_AA1270850.2};	Nucleolar GTPase/ATPase p130	--	SRP40, C-terminal domain
TRINITY_DN1034_c0_g1_i1.path2	16.35	21.22	17.58	6.06	6.51	3.5	448	720	493	153	202	99	0.316	-1.66	9.72915e-12	1.09305e-10	down	5D	67833703	67836500	-	TRINITY_DN1034_c0_g1_i1	--	K08991 crossover junction endonuclease MUS81 [EC:3.1.22.-] | (RefSeq) hypothetical protein (A)	suppressor protein SRP40 [Aegilops tauschii subsp. tauschii]	--	SubName: Full=Uncharacterized protein {ECO:0000313|EnsemblPlants:TRIAE_CS42_5AS_TGACv1_393298_AA1270850.2};	Nucleolar GTPase/ATPase p130	--	SRP40, C-terminal domain
TRINITY_DN103401_c0_g1_i1.path1	5.3	9.21	5.58	0	0	0	26	56	28	0	0	0	0.006	-7.371	1.54198e-08	1.21713e-07	down	6A	241765008	241771482	-	TRINITY_DN103401_c0_g1_i1	--	--	--	--	--	--	--	--
TRINITY_DN103401_c0_g1_i1.path2	6.13	5.94	5	0	0	0	30	36	25	0	0	0	0.007	-7.138	5.26375e-08	3.88482e-07	down	6D	208671391	208677858	-	TRINITY_DN103401_c0_g1_i1	--	--	--	--	--	--	--	--
TRINITY_DN103405_c0_g1_i1.path1	2.48	1.8	5.33	0	0.44	0	10	9	22	0	2	0	0.052	-4.266	0.0015957	0.00551593	down	7D	523508333	523508587	-	TRINITY_DN103405_c0_g1_i1	--	--	--	--	--	--	--	--
TRINITY_DN103407_c0_g1_i1.path1	31.65	32.54	28.78	13.41	11.23	6.83	274	349	255	107	110	61	0.367	-1.447	4.18419e-08	3.13226e-07	down	2C	325163050	325163596	+	TRINITY_DN103407_c0_g1_i1	--	--	--	--	--	--	--	--
TRINITY_DN103408_c0_g1_i1.path1	0	0.19	0	4.64	2.31	2.07	0	1	0	18	11	9	41.431	5.373	0.000174203	0.000743816	up	2C	70583239	70583504	+	TRINITY_DN103408_c0_g1_i1	--	--	--	--	--	--	--	--
TRINITY_DN103410_c0_g1_i1.path1	8.94	9.91	11.99	2.3	2.81	1.76	59	81	81	14	21	12	0.243	-2.042	8.28548e-07	5.19621e-06	down	4D	228530732	228531148	-	TRINITY_DN103410_c0_g1_i1	--	K08286 protein-serine/threonine kinase [EC:2.7.11.-] | (RefSeq) receptor-like protein kinase 5 (A)	predicted protein [Hordeum vulgare subsp. vulgare]	RecName: Full=Receptor protein-tyrosine kinase CEPR2 {ECO:0000303|PubMed:25324386}; EC=2.7.10.1 {ECO:0000255|PROSITE-ProRule:PRU10027}; AltName: Full=Protein C-TERMINALLY ENCODED PEPTIDE RECEPTOR 2 {ECO:0000303|PubMed:25324386}; Flags: Precursor;	SubName: Full=Predicted protein {ECO:0000313|EnsemblPlants:HORVU4Hr1G015740.2};	--	GO:0016021,integral component of membrane; GO:0005886,plasma membrane; GO:0005524,ATP binding; GO:0042277,peptide binding; GO:0017046,peptide hormone binding; GO:0001653,peptide receptor activity; GO:0004674,protein serine/threonine kinase activity; GO:0004714,transmembrane receptor protein tyrosine kinase activity; GO:1902025,nitrate import; GO:2000280,regulation of root development; GO:0048831,…	Leucine Rich repeats (2 copies)
TRINITY_DN103412_c0_g1_i1.path1	9.46	6.85	7.62	1.21	1.48	1.62	68	61	56	8	12	12	0.198	-2.334	4.76621e-07	3.09413e-06	down	7C	433343972	433344425	+	TRINITY_DN103412_c0_g1_i1	--	--	uncharacterized protein LOC109785565 [Aegilops tauschii subsp. tauschii]	--	SubName: Full=Uncharacterized protein {ECO:0000313|EnsemblPlants:TRIAE_CS42_7AL_TGACv1_556357_AA1761590.1};	--	--	--
TRINITY_DN10342_c0_g1_i1.path1	1.44	1.94	1.47	0.39	0.48	0.23	24	40	25	6	9	4	0.248	-2.01	0.000882014	0.00324411	down	6C	51427455	51428507	+	TRINITY_DN10342_c0_g1_i1	--	--	--	--	--	--	--	--
TRINITY_DN10342_c1_g1_i1.path1	9.13	9.02	6.84	1.81	2.43	1.45	219	268	168	40	66	36	0.25	-2.002	3.08203e-12	3.64508e-11	down	4A	430004579	430006193	-	TRINITY_DN10342_c1_g1_i1	--	--	--	--	--	--	--	--
TRINITY_DN10342_c1_g1_i1.path2	5.52	5.51	7.04	0.18	0.56	0.82	131	162	171	4	15	20	0.097	-3.37	4.26296e-15	6.57809e-14	down	1A	329821731	329823329	-	TRINITY_DN10342_c1_g1_i1	--	--	--	--	--	--	--	--
TRINITY_DN10342_c1_g1_i1.path3	4.08	4	0.9	0.05	0	0.45	97	118	22	1	0	11	0.067	-3.904	0.00991416	0.0273565	down	Chr00	12394843	12396816	-	TRINITY_DN10342_c1_g1_i1	--	--	--	--	--	--	--	--
TRINITY_DN103426_c0_g1_i1.path1	0.53	1.28	1.03	4.57	8.37	11.73	2	6	4	16	36	46	9.717	3.281	2.22202e-06	1.30684e-05	up	5A	103368774	103369013	-	TRINITY_DN103426_c0_g1_i1	--	--	--	--	--	--	--	--
TRINITY_DN103433_c0_g1_i1.path1	1.2	3.1	1.64	10.16	10.19	11.87	5	16	7	39	48	51	5.951	2.573	5.36134e-07	3.45591e-06	up	7C	646316179	646316441	+	TRINITY_DN103433_c0_g1_i1	--	--	ARM REPEAT PROTEIN INTERACTING WITH ABF2-like [Aegilops tauschii subsp. tauschii]	--	SubName: Full=Uncharacterized protein {ECO:0000313|EnsemblPlants:TRIAE_CS42_4DL_TGACv1_342519_AA1115740.1};	FOG: Armadillo/beta-catenin-like repeats	--	--
TRINITY_DN103435_c0_g1_i1.path1	3.41	4.46	3.67	0.76	0.83	0.68	29	47	32	6	8	6	0.217	-2.205	9.04943e-05	0.000407706	down	4D	315478171	315478708	+	TRINITY_DN103435_c0_g1_i1	--	K21866 ion channel POLLUX/CASTOR | (RefSeq) probable ion channel CASTOR isoform X1 (A)	hypothetical protein CQW23_35624 [Capsicum baccatum]	RecName: Full=Ion channel CASTOR;	SubName: Full=Uncharacterized protein {ECO:0000313|EMBL:PHT24694.1};	--	GO:0016021,integral component of membrane; GO:0031965,nuclear membrane; GO:0006811,ion transport	Castor and Pollux, part of voltage-gated ion channel
TRINITY_DN103442_c0_g1_i1.path1	5.04	6	4.93	1.15	1.41	0	19	28	19	4	6	0	0.172	-2.538	0.00139322	0.00488676	down	5D	486736452	486736770	-	TRINITY_DN103442_c0_g1_i1	--	K01426 amidase [EC:3.5.1.4] | (RefSeq) amidase 1 (A)	PREDICTED: amidase 1 [Brachypodium distachyon]	--	SubName: Full=Uncharacterized protein {ECO:0000313|EnsemblPlants:TRIAE_CS42_2AL_TGACv1_092977_AA0268390.1};	--	GO:0005829,cytosol; GO:0005654,nucleoplasm; GO:0004040,amidase activity; GO:0043864,indoleacetamide hydrolase activity; GO:0009684,indoleacetic acid biosynthetic process	--
TRINITY_DN103446_c0_g1_i1.path1	2.9	4.46	3.09	0	0	0.77	11	21	12	0	0	3	0.084	-3.575	0.00214524	0.00717069	down	7D	240612453	240612692	+	TRINITY_DN103446_c0_g1_i1	--	--	--	--	--	--	--	--
TRINITY_DN10345_c0_g2_i3.path1	12.06	11.66	8.88	2.77	4.39	1.59	345	413	260	73	142	47	0.29	-1.785	6.31025e-09	5.23372e-08	down	2C	217848793	217850991	+	TRINITY_DN10345_c0_g2_i3	--	--	--	--	--	--	--	--
TRINITY_DN103452_c0_g1_i1.path1	0	0	0	4.41	6.36	3.33	0	0	0	13	23	11	95.987	6.585	2.5634e-06	1.49282e-05	up	3D	329999429	329999630	+	TRINITY_DN103452_c0_g1_i1	--	K08241 jasmonate O-methyltransferase [EC:2.1.1.141] | (RefSeq) 3,7-dimethylxanthine N-methyltransferase-like (A)	predicted protein [Hordeum vulgare subsp. vulgare]	RecName: Full=Probable caffeine synthase 2; EC=2.1.1.160;	SubName: Full=Predicted protein {ECO:0000313|EMBL:BAJ87645.1, ECO:0000313|EnsemblPlants:HORVU3Hr1G065790.1};	--	GO:0102741,paraxanthine:S-adenosyl-L-methionine 3-N-methyltransferase activity; GO:0102740,theobromine:S-adenosyl-L-methionine 1-N-methyltransferase activity; GO:0009820,alkaloid metabolic process	--
TRINITY_DN103452_c0_g1_i1.path2	0.96	1.8	0.94	6.23	5.08	3.71	3	7	3	18	18	12	4.394	2.136	0.00432176	0.0132516	up	3C	534515053	534515364	-	TRINITY_DN103452_c0_g1_i1	--	K08241 jasmonate O-methyltransferase [EC:2.1.1.141] | (RefSeq) 3,7-dimethylxanthine N-methyltransferase-like (A)	predicted protein [Hordeum vulgare subsp. vulgare]	RecName: Full=Theobromine synthase 2; EC=2.1.1.159;	SubName: Full=Predicted protein {ECO:0000313|EMBL:BAJ90456.1};	--	GO:0008168,methyltransferase activity; GO:0009820,alkaloid metabolic process	--
TRINITY_DN103455_c0_g1_i1.path1	4.67	1.6	3.6	1.23	0.5	0.27	33	14	26	8	4	2	0.214	-2.223	0.00288209	0.00930504	down	7C	433340674	433341119	+	TRINITY_DN103455_c0_g1_i1	--	--	--	--	--	--	--	--
TRINITY_DN103467_c0_g1_i1.path1	1.82	4.04	2.22	0	0.2	0	8	22	10	0	1	0	0.033	-4.936	0.000709013	0.00266437	down	6A	401803607	401803884	+	TRINITY_DN103467_c0_g1_i1	--	--	--	--	--	--	--	--
TRINITY_DN103482_c0_g1_i1.path1	267.02	213.21	227	83.16	86.9	64.06	1268	1254	1103	364	467	314	0.36	-1.473	9.83452e-13	1.21933e-11	down	5C	9023849	9024148	+	TRINITY_DN103482_c0_g1_i1	--	--	transcription factor RAU1, partial [Oryza sativa]	RecName: Full=Transcription factor bHLH130; AltName: Full=Basic helix-loop-helix protein 130; Short=AtbHLH130; Short=bHLH 130; AltName: Full=Transcription factor EN 69; AltName: Full=bHLH transcription factor bHLH130;	SubName: Full=Uncharacterized protein {ECO:0000313|EnsemblPlants:HORVU7Hr1G050530.5};	--	GO:0005634,nucleus; GO:0001046,core promoter sequence-specific DNA binding; GO:0003700,DNA-binding transcription factor activity; GO:0046983,protein dimerization activity; GO:0001228,DNA-binding transcription activator activity, RNA polymerase II-specific; GO:0048573,photoperiodism, flowering; GO:0006355,regulation of transcription, DNA-templated; GO:0006366,transcription by RNA polymerase II	--
TRINITY_DN103488_c0_g1_i1.path1	7.19	12.23	6.53	45.7	37.22	47.52	28	59	26	164	164	191	5.576	2.479	3.87698e-14	5.49618e-13	up	5D	494625889	494626134	+	TRINITY_DN103488_c0_g1_i1	--	K08342 cysteine protease ATG4 [EC:3.4.22.-] | (RefSeq) cysteine protease ATG4B-like (A)	PREDICTED: cysteine protease ATG4B-like [Brachypodium distachyon]	RecName: Full=Cysteine protease ATG4; EC=3.4.22.-; AltName: Full=Autophagy-related protein 4;	RecName: Full=Cysteine protease {ECO:0000256|RuleBase:RU363115}; EC=3.4.22.- {ECO:0000256|RuleBase:RU363115};	--	GO:0005737,cytoplasm; GO:0008234,cysteine-type peptidase activity; GO:0006914,autophagy; GO:0015031,protein transport	--
TRINITY_DN10349_c0_g2_i10.path1	25.25	22.56	22.13	4.16	4.36	2.71	921	1019	826	140	180	102	0.174	-2.52	6.15467e-30	2.53496e-28	down	1A	294341205	294344654	+	TRINITY_DN10349_c0_g2_i10	--	--	--	--	--	--	--	--
TRINITY_DN10349_c0_g3_i1.path1	24.59	30.77	24.59	8.11	8.44	4.95	260	403	266	79	101	54	0.293	-1.772	6.04418e-12	6.94294e-11	down	6C	568057774	568058558	+	TRINITY_DN10349_c0_g3_i1	--	--	--	--	--	--	--	--
TRINITY_DN10351_c1_g1_i1.path1	4.49	4.29	2.65	1.41	2.3	1.06	131	155	79	38	76	32	0.457	-1.13	0.00129051	0.00456432	down	2C	164469472	164471315	-	TRINITY_DN10351_c1_g1_i1	--	--	--	--	--	--	--	--
TRINITY_DN10351_c1_g2_i1.path1	3.59	3.13	2.65	1.11	0.94	0.38	176	190	133	50	52	19	0.278	-1.848	1.15518e-07	8.15031e-07	down	2C	164471295	164474510	-	TRINITY_DN10351_c1_g2_i1	--	--	--	--	--	--	--	--
TRINITY_DN10353_c0_g1_i1.path1	2.17	7.88	7.26	60.14	45.97	80.71	14	63	48	358	336	538	12.076	3.594	2.89448e-20	6.58399e-19	up	7A	63972902	63973430	-	TRINITY_DN10353_c0_g1_i1	--	--	--	--	--	--	--	--
TRINITY_DN10353_c0_g1_i1.path2	0	0.73	0.88	7.36	4.66	10.52	0	6	6	45	35	72	15.466	3.951	3.30338e-09	2.8391e-08	up	7D	329669339	329669878	+	TRINITY_DN10353_c0_g1_i1	--	--	--	--	--	--	--	--
TRINITY_DN103530_c0_g1_i1.path1	3.1	1.19	1.75	0	0	0.16	19	9	11	0	0	1	0.031	-5.011	0.000575838	0.00220869	down	1A	238848578	238848964	-	TRINITY_DN103530_c0_g1_i1	--	--	--	--	--	--	--	--
TRINITY_DN103537_c0_g1_i1.path1	31.47	30.53	22.72	4.84	11.62	7.74	134	161	99	19	56	34	0.316	-1.661	3.31664e-06	1.89801e-05	down	7D	507361503	507361771	+	TRINITY_DN103537_c0_g1_i1	--	--	--	--	--	--	--	--
TRINITY_DN103537_c0_g1_i1.path2	38.75	31.48	38.1	2.8	3.32	2.28	165	166	166	11	16	10	0.085	-3.562	2.8609e-21	6.98903e-20	down	7A	423510496	423510764	+	TRINITY_DN103537_c0_g1_i1	--	--	--	--	--	--	--	--
TRINITY_DN10354_c3_g1_i1.path1	25.27	21.15	23.43	5.24	5.42	1.98	136	141	129	26	33	11	0.195	-2.36	1.50513e-10	1.49717e-09	down	3D	13168537	13168876	-	TRINITY_DN10354_c3_g1_i1	--	--	--	--	--	--	--	--
TRINITY_DN10355_c0_g1_i10.path3	1.52	1.96	2.14	0.66	0.75	0.52	45	72	65	18	25	16	0.374	-1.419	0.000551933	0.00212506	down	3C	297180483	297184571	-	TRINITY_DN10355_c0_g1_i10	--	--	--	--	--	--	--	--
TRINITY_DN103571_c0_g1_i1.path1	0	0	0	4.61	13.81	2.66	0	0	0	31	114	20	320.407	8.324	2.83881e-10	2.73981e-09	up	2D	363486910	363487370	-	TRINITY_DN103571_c0_g1_i1	--	--	PREDICTED: putative invertase inhibitor [Brachypodium distachyon]	--	SubName: Full=Uncharacterized protein {ECO:0000313|EnsemblPlants:HORVU2Hr1G105200.1};	--	GO:0004857,enzyme inhibitor activity	Plant invertase/pectin methylesterase inhibitor
TRINITY_DN103572_c0_g1_i1.path1	0	2.43	1.76	12.08	15.68	26.81	0	10	6	37	59	92	14.415	3.85	1.01262e-09	9.2252e-09	up	6C	131040714	131040923	+	TRINITY_DN103572_c0_g1_i1	--	--	--	--	--	--	--	--
TRINITY_DN10358_c1_g2_i1.path1	6.54	7.54	10.65	23.97	13.2	17.79	21	30	35	71	48	59	2.435	1.284	0.00201159	0.00677723	up	4A	323038286	323038488	+	TRINITY_DN10358_c1_g2_i1	--	K04733 interleukin-1 receptor-associated kinase 4 [EC:2.7.11.1] | (RefSeq) LOC109748424; wall-associated receptor kinase 2-like (A)	PREDICTED: wall-associated receptor kinase 2-like [Brachypodium distachyon]	RecName: Full=Receptor-like protein kinase THESEUS 1; EC=2.7.11.-; Flags: Precursor;	SubName: Full=Uncharacterized protein {ECO:0000313|EnsemblPlants:TRIAE_CS42_1BS_TGACv1_050175_AA0168560.1};	Serine/threonine protein kinase	GO:0016021,integral component of membrane; GO:0005886,plasma membrane; GO:0009506,plasmodesma; GO:0005524,ATP binding; GO:0004672,protein kinase activity; GO:0004674,protein serine/threonine kinase activity; GO:0046777,protein autophosphorylation	Protein tyrosine kinase
TRINITY_DN103585_c0_g1_i1.path2	1.97	6.35	2.47	7.01	7.94	8.98	7	28	9	23	32	33	2.463	1.301	0.0199929	0.0497645	up	5A	405946276	405946500	+	TRINITY_DN103585_c0_g1_i1	--	--	--	--	--	--	--	--
TRINITY_DN103585_c0_g1_i1.path3	8.63	14.38	12.78	49.52	47.96	49.34	31	64	47	164	195	183	4.515	2.175	1.96237e-13	2.6047e-12	up	5C	475463603	475463829	+	TRINITY_DN103585_c0_g1_i1	--	--	--	--	--	--	--	--
TRINITY_DN103586_c0_g1_i1.path1	56.59	45.24	36.02	6.12	9.47	7.83	301	298	196	30	57	43	0.188	-2.412	1.20665e-15	1.94849e-14	down	6C	436829181	436829691	+	TRINITY_DN103586_c0_g1_i1	--	K07466 replication factor A1 | (RefSeq) replication protein A 70 kDa DNA-binding subunit B (A)	PREDICTED: replication protein A 70 kDa DNA-binding subunit B isoform X7 [Brachypodium distachyon]	--	SubName: Full=Uncharacterized protein {ECO:0000313|EnsemblPlants:BRADI4G18320.1};	--	--	--
TRINITY_DN1036_c0_g1_i4.path1	8	8.42	7.16	16.57	15.68	13.7	572	746	524	1092	1269	1011	2.138	1.097	1.51566e-09	1.35301e-08	up	1D	340884075	340894362	+	TRINITY_DN1036_c0_g1_i4	--	K11838 ubiquitin carboxyl-terminal hydrolase 7 [EC:3.4.19.12] | (RefSeq) hypothetical protein (A)	MATH domain-containing protein At5g43560-like isoform X2 [Aegilops tauschii subsp. tauschii]	RecName: Full=TNF receptor-associated factor homolog 1b {ECO:0000305}; AltName: Full=Protein MUTANT SNC1-ENHANCING 13 {ECO:0000303|PubMed:26867179};	SubName: Full=Uncharacterized protein {ECO:0000313|EnsemblPlants:TRIAE_CS42_1BL_TGACv1_031004_AA0105520.1};	--	GO:0005737,cytoplasm; GO:0005829,cytosol; GO:0005886,plasma membrane; GO:1905037,autophagosome organization; GO:0045087,innate immune response	MATH domain
TRINITY_DN103600_c0_g1_i1.path1	2.96	4.61	5.16	1.38	0.93	1.64	14	27	25	6	5	8	0.341	-1.55	0.019024	0.0477374	down	7C	6481328	6481626	-	TRINITY_DN103600_c0_g1_i1	--	--	--	--	--	--	--	--
TRINITY_DN103602_c0_g1_i1.path1	0	0	0	0.8	0.92	0.57	0	0	0	5	7	4	33.035	5.046	0.00332395	0.0105319	up	6C	417292885	417293311	-	TRINITY_DN103602_c0_g1_i1	--	K00696 sucrose-phosphate synthase [EC:2.4.1.14] | (RefSeq) LOC109780026; probable sucrose-phosphate synthase 2 (A)	probable sucrose-phosphate synthase 2 [Aegilops tauschii subsp. tauschii]	RecName: Full=Probable sucrose-phosphate synthase 2; EC=2.4.1.14; AltName: Full=Sucrose phosphate synthase 2F; Short=OsSPS2F; AltName: Full=UDP-glucose-fructose-phosphate glucosyltransferase;	SubName: Full=Uncharacterized protein {ECO:0000313|EnsemblPlants:HORVU6Hr1G028330.3};	Glycosyltransferase	GO:0016157,sucrose synthase activity; GO:0046524,sucrose-phosphate synthase activity; GO:0005986,sucrose biosynthetic process	--
TRINITY_DN103609_c0_g1_i1.path1	7.8	5	5.67	1.74	2.12	1.16	39	31	29	8	12	6	0.296	-1.756	0.00165002	0.00568177	down	7C	423316298	423316613	-	TRINITY_DN103609_c0_g1_i1	--	--	--	--	--	--	--	--
TRINITY_DN103612_c0_g1_i1.path1	43.98	49.83	42.27	18.98	22.12	19.07	181	254	178	72	103	81	0.487	-1.039	3.67173e-05	0.000177727	down	7C	614512504	614512763	-	TRINITY_DN103612_c0_g1_i1	--	--	--	--	--	--	--	--
TRINITY_DN10362_c0_g1_i1.path1	0.42	0.85	0.37	32.94	32.87	45.89	11	28	10	803	984	1253	75.353	6.236	1.67107e-72	3.98002e-70	up	7A	36985804	36989118	+	TRINITY_DN10362_c0_g1_i1	--	K01184 polygalacturonase [EC:3.2.1.15] | (RefSeq) polygalacturonase At1g48100 (A)	predicted protein [Hordeum vulgare subsp. vulgare]	RecName: Full=Probable polygalacturonase; Short=PG {ECO:0000250|UniProtKB:Q7M1E7}; EC=3.2.1.15; AltName: Full=Pectinase {ECO:0000250|UniProtKB:Q7M1E7};	SubName: Full=Predicted protein {ECO:0000313|EMBL:BAJ97036.1};	--	GO:0016021,integral component of membrane; GO:0004650,polygalacturonase activity; GO:0005975,carbohydrate metabolic process	Glycosyl hydrolases family 28
TRINITY_DN103623_c0_g1_i1.path3	0	0	0	1.02	0.18	0.4	0	0	0	9	2	4	32.854	5.038	0.00468173	0.0142089	up	1A	448810253	448810858	+	TRINITY_DN103623_c0_g1_i1	--	K01051 pectinesterase [EC:3.1.1.11] | (RefSeq) LOC109784381; pectinesterase-like (A)	pectinesterase-like [Aegilops tauschii subsp. tauschii]	RecName: Full=Probable pectinesterase/pectinesterase inhibitor 41; Includes: RecName: Full=Pectinesterase inhibitor 41; AltName: Full=Pectin methylesterase inhibitor 41; Includes: RecName: Full=Pectinesterase 41; Short=PE 41; EC=3.1.1.11; AltName: Full=AtPMEpcrB; AltName: Full=Pectin methylesterase 41; Short=AtPME41; Flags: Precursor;	SubName: Full=Pectinesterase {ECO:0000313|EnsemblPlants:HORVU1Hr1G059010.2};	--	GO:0071944,cell periphery; GO:0005618,cell wall; GO:0005576,extracellular region; GO:0045330,aspartyl esterase activity; GO:0030599,pectinesterase activity; GO:0046910,pectinesterase inhibitor activity; GO:0042545,cell wall modification; GO:0045490,pectin catabolic process; GO:0009741,response to brassinosteroid; GO:0009409,response to cold; GO:0009620,response to fungus	Plant invertase/pectin methylesterase inhibitor
TRINITY_DN103627_c0_g1_i1.path1	5.11	4.61	5.59	41.45	58.49	45.17	17	19	19	127	220	155	10.428	3.382	4.16229e-23	1.15224e-21	up	4C	107697176	107698915	-	TRINITY_DN103627_c0_g1_i1	--	--	--	--	--	--	--	--
TRINITY_DN103628_c0_g1_i1.path1	8.92	6.03	5.87	2.37	0.8	1.94	49	41	33	12	5	11	0.269	-1.895	0.000593138	0.0022673	down	2A	268517136	268517482	+	TRINITY_DN103628_c0_g1_i1	--	--	--	--	SubName: Full=Uncharacterized protein {ECO:0000313|EnsemblPlants:TRIAE_CS42_5AL_TGACv1_373969_AA1185780.1};	--	--	--
TRINITY_DN103636_c0_g1_i1.path1	3.66	3.88	6.26	0.5	0.61	0.67	16	21	28	2	3	3	0.14	-2.832	0.000392346	0.00156049	down	6C	27921595	27921870	+	TRINITY_DN103636_c0_g1_i1	--	--	--	--	--	--	--	--
TRINITY_DN10364_c0_g2_i1.path2	0.04	0	0.04	0.48	0.31	0.21	1	0	1	10	8	5	12.982	3.698	0.00798969	0.0226779	up	5D	86029504	86124631	+	TRINITY_DN10364_c0_g2_i1	--	--	uncharacterized protein LOC109780737 [Aegilops tauschii subsp. tauschii]	--	SubName: Full=Uncharacterized protein {ECO:0000313|EnsemblPlants:TRIAE_CS42_5DS_TGACv1_458102_AA1492040.1};	--	--	--
TRINITY_DN103644_c0_g1_i1.path1	4.93	6.16	6.73	15.34	14.8	17.4	53	82	74	152	180	193	2.948	1.56	6.00795e-08	4.39747e-07	up	4C	216670765	216671443	+	TRINITY_DN103644_c0_g1_i1	--	--	--	--	--	--	--	--
TRINITY_DN103646_c0_g1_i1.path1	3.55	3.58	2.17	0	1.57	0	16	20	10	0	8	0	0.187	-2.422	0.0196091	0.0489663	down	6C	14277623	14277907	+	TRINITY_DN103646_c0_g1_i1	--	--	--	--	--	--	--	--
TRINITY_DN103657_c0_g1_i1.path1	13.33	13.46	18.51	0.82	1.2	0.44	88	110	125	5	9	3	0.059	-4.073	4.18369e-16	6.98845e-15	down	4C	168560345	168563445	+	TRINITY_DN103657_c0_g1_i1	--	--	--	--	--	--	--	--
TRINITY_DN10366_c0_g1_i4.path1	1.53	1.96	1.93	12.23	11.14	10.3	77	122	99	566	633	534	6.81	2.768	1.18543e-34	6.12274e-33	up	7D	325435782	325441965	+	TRINITY_DN10366_c0_g1_i4	--	K23518 O-acetyl-ADP-ribose deacetylase [EC:3.1.1.106] | (RefSeq) uncharacterized protein LOC112034050 (A)	protein GDAP2 homolog isoform X1 [Aegilops tauschii subsp. tauschii]	--	SubName: Full=Uncharacterized protein {ECO:0000313|EnsemblPlants:TRIAE_CS42_1AL_TGACv1_000919_AA0021850.3};	Hismacro and SEC14 domain-containing proteins	--	Macro domain
TRINITY_DN10366_c0_g1_i4.path2	1.71	1.64	2.41	5.1	4.07	4.17	86	102	124	236	231	216	2.526	1.337	1.65702e-06	9.94267e-06	up	4C	317283740	317292658	+	TRINITY_DN10366_c0_g1_i4	--	--	ganglioside-induced differentiation-associated protein 2-like isoform X3 [Aegilops tauschii subsp. tauschii]	--	SubName: Full=Uncharacterized protein {ECO:0000313|EnsemblPlants:ORUFI10G12090.1};	Hismacro and SEC14 domain-containing proteins	--	--
TRINITY_DN10366_c0_g3_i1.path2	9.36	5.96	7.54	2.36	3.21	1.53	142	112	117	33	55	24	0.336	-1.574	9.26031e-06	4.95414e-05	down	1A	409473046	409476570	+	TRINITY_DN10366_c0_g3_i1	--	--	--	--	--	--	--	--
TRINITY_DN103668_c0_g1_i1.path1	0.2	0	0.2	0.87	3.56	2.73	1	0	1	4	20	14	20.925	4.387	0.000896608	0.00329284	up	3D	375723136	375723449	-	TRINITY_DN103668_c0_g1_i1	--	--	--	--	--	--	--	--
TRINITY_DN10367_c0_g1_i1.path2	1.46	1.58	1.84	0.04	0.06	0.21	41	55	53	1	2	6	0.071	-3.821	1.34285e-08	1.06755e-07	down	6A	43103344	43107524	+	TRINITY_DN10367_c0_g1_i1	--	--	--	--	SubName: Full=Uncharacterized protein {ECO:0000313|EMBL:EMT11734.1, ECO:0000313|EnsemblPlants:EMT11734};	--	--	--
TRINITY_DN10369_c0_g1_i4.path1	7.87	8.4	8.23	2.81	4	2.29	370	489	396	122	213	111	0.404	-1.307	5.46221e-08	4.02109e-07	down	4A	338467202	338475920	-	TRINITY_DN10369_c0_g1_i4	--	K12591 exosome complex exonuclease RRP6 [EC:3.1.13.-] | (RefSeq) LOC109779078; protein RRP6-like 1 (A)	protein RRP6-like 1 [Aegilops tauschii subsp. tauschii]	RecName: Full=Protein RRP6-like 2 {ECO:0000303|PubMed:18285452}; Short=AtRRP6L2 {ECO:0000303|PubMed:18285452};	SubName: Full=Uncharacterized protein {ECO:0000313|EnsemblPlants:TRIAE_CS42_4DL_TGACv1_344003_AA1142370.2};	Exosome 3'-5' exoribonuclease complex, subunit PM/SCL-100 (Rrp6)	GO:0005737,cytoplasm; GO:0005829,cytosol; GO:0000176,nuclear exosome (RNase complex); GO:0005730,nucleolus; GO:0005634,nucleus; GO:0008408,3'-5' exonuclease activity; GO:0003676,nucleic acid binding; GO:0000166,nucleotide binding; GO:0043633,polyadenylation-dependent RNA catabolic process; GO:1902466,positive regulation of histone H3-K27 trimethylation; GO:0080188,RNA-directed DNA methylation; GO…	3'-5' exonuclease
TRINITY_DN10369_c0_g1_i4.path2	9.52	9.81	11.88	4.52	5.15	3.25	448	572	572	196	274	158	0.448	-1.158	8.41331e-07	5.26963e-06	down	1D	459186504	459192984	-	TRINITY_DN10369_c0_g1_i4	--	K12591 exosome complex exonuclease RRP6 [EC:3.1.13.-] | (RefSeq) LOC109779078; protein RRP6-like 1 (A)	protein RRP6-like 1 [Aegilops tauschii subsp. tauschii]	RecName: Full=Protein RRP6-like 2 {ECO:0000303|PubMed:18285452}; Short=AtRRP6L2 {ECO:0000303|PubMed:18285452};	SubName: Full=Uncharacterized protein {ECO:0000313|EnsemblPlants:TRIAE_CS42_4DL_TGACv1_344003_AA1142370.2};	Exosome 3'-5' exoribonuclease complex, subunit PM/SCL-100 (Rrp6)	GO:0005737,cytoplasm; GO:0005829,cytosol; GO:0000176,nuclear exosome (RNase complex); GO:0005730,nucleolus; GO:0005634,nucleus; GO:0008408,3'-5' exonuclease activity; GO:0003676,nucleic acid binding; GO:0000166,nucleotide binding; GO:0043633,polyadenylation-dependent RNA catabolic process; GO:1902466,positive regulation of histone H3-K27 trimethylation; GO:0080188,RNA-directed DNA methylation; GO…	3'-5' exonuclease
TRINITY_DN103694_c0_g1_i1.path1	3.34	3.73	1.76	0	0.68	0	13	18	7	0	3	0	0.089	-3.492	0.00448674	0.0136918	down	1A	151992707	151992952	+	TRINITY_DN103694_c0_g1_i1	--	--	--	--	--	--	--	--
TRINITY_DN10370_c0_g1_i1.path1	2.8	5.86	3.06	40.8	26.67	43.47	17	44	19	228	183	272	10.528	3.396	6.78691e-21	1.62101e-19	up	5A	112955669	112956051	+	TRINITY_DN10370_c0_g1_i1	--	--	--	--	--	--	--	--
TRINITY_DN10370_c0_g2_i1.path1	0.34	1.94	0.67	5.84	4.45	7.98	3	21	6	47	44	72	6.877	2.782	8.74833e-07	5.46844e-06	up	4C	26546778	26547948	+	TRINITY_DN10370_c0_g2_i1	--	--	--	--	--	--	--	--
TRINITY_DN103706_c0_g1_i1.path1	11.38	12.38	9.31	3.53	6.98	1.8	49	66	41	14	34	8	0.404	-1.309	0.00657451	0.0191197	down	2D	495176803	495177074	+	TRINITY_DN103706_c0_g1_i1	--	--	--	--	--	--	--	--
TRINITY_DN103719_c0_g1_i1.path1	0	0	0	1.02	1.66	2.12	0	0	0	3	6	7	33.642	5.072	0.00329091	0.0104407	up	4D	350107726	350107927	-	TRINITY_DN103719_c0_g1_i1	--	--	--	--	--	--	--	--
TRINITY_DN103719_c0_g1_i1.path2	1.28	1.81	3.13	36.18	21.54	35.42	4	7	10	104	76	114	16.617	4.055	1.87411e-16	3.2254e-15	up	4A	427454190	427454386	-	TRINITY_DN103719_c0_g1_i1	--	--	--	--	--	--	--	--
TRINITY_DN10372_c0_g2_i1.path1	7.78	6.34	4.47	2.78	2.83	1.24	97	98	57	32	40	16	0.4	-1.322	0.00080964	0.00300389	down	6C	418076355	418077142	-	TRINITY_DN10372_c0_g2_i1	--	--	--	--	--	--	--	--
TRINITY_DN10372_c3_g1_i1.path1	3.71	3.57	4.57	8.49	10.05	8.02	73	87	92	154	224	163	2.452	1.294	1.62368e-06	9.75895e-06	up	6C	342065322	342066565	+	TRINITY_DN10372_c3_g1_i1	--	--	--	--	--	--	--	--
TRINITY_DN103722_c0_g1_i1.path1	0	0	0	1.84	0.53	0.48	0	0	0	17	6	5	60.241	5.913	0.00014534	0.000630376	up	4D	300136080	300136713	+	TRINITY_DN103722_c0_g1_i1	--	--	--	--	--	--	--	Borrelia burgdorferi BBR25 lipoprotein
TRINITY_DN103732_c0_g1_i1.path1	36.62	21.22	20.22	5.46	2.22	3.52	131	94	74	18	9	13	0.156	-2.681	2.74805e-09	2.38213e-08	down	5C	158545433	158545658	-	TRINITY_DN103732_c0_g1_i1	--	--	--	--	--	--	--	--
TRINITY_DN103738_c0_g1_i1.path1	0.91	1.76	1.96	33.58	27.99	48.86	5	12	11	170	174	277	26.611	4.734	9.40501e-28	3.42527e-26	up	6A	209216343	209216689	-	TRINITY_DN103738_c0_g1_i1	--	K01179 endoglucanase [EC:3.2.1.4] | (RefSeq) endoglucanase 11-like (A)	endoglucanase 21-like [Aegilops tauschii subsp. tauschii]	RecName: Full=Endoglucanase 7; EC=3.2.1.4; AltName: Full=Endo-1,4-beta glucanase 7; AltName: Full=OsGLU10; Flags: Precursor;	SubName: Full=Uncharacterized protein {ECO:0000313|EnsemblPlants:HORVU0Hr1G023830.1};	--	GO:0005576,extracellular region; GO:0008810,cellulase activity; GO:0071555,cell wall organization; GO:0030245,cellulose catabolic process	Glycosyl hydrolase family 9
TRINITY_DN103741_c0_g1_i1.path1	5.39	3.87	6.14	0	0.53	0	18	16	21	0	2	0	0.04	-4.646	0.000227349	0.000948432	down	7C	24837567	24837777	+	TRINITY_DN103741_c0_g1_i1	--	--	--	--	--	--	--	--
TRINITY_DN103743_c0_g1_i1.path1	12.16	10.87	9.34	2.59	2.3	1.47	56	62	44	11	12	7	0.214	-2.224	2.95388e-06	1.70423e-05	down	4C	490497123	490497413	+	TRINITY_DN103743_c0_g1_i1	--	--	--	--	--	--	--	--
TRINITY_DN103744_c0_g1_i1.path1	0	0	0.79	0.59	2.15	5.49	0	0	3	2	9	21	12.119	3.599	0.00683221	0.0197648	up	2A	28871705	28871938	-	TRINITY_DN103744_c0_g1_i1	--	--	--	--	--	--	--	--
TRINITY_DN103744_c0_g1_i1.path2	0	1.74	0.26	16.4	12.64	23.8	0	8	1	56	53	91	27.97	4.806	3.63754e-12	4.26579e-11	up	2D	275450030	275450263	-	TRINITY_DN103744_c0_g1_i1	--	--	--	--	--	--	--	--
TRINITY_DN10375_c0_g1_i16.path1	3.39	3.41	2.84	1.45	1.47	0.7	229	285	196	90	112	49	0.406	-1.301	5.06833e-06	2.82679e-05	down	3A	111216248	111222268	-	TRINITY_DN10375_c0_g1_i16	--	--	--	--	--	--	--	--
TRINITY_DN103756_c0_g1_i1.path1	6.46	7.96	8.68	29.1	34.84	31.15	40	61	55	166	244	199	4.522	2.177	6.88532e-15	1.04527e-13	up	4C	68321598	68321988	+	TRINITY_DN103756_c0_g1_i1	--	--	--	--	--	--	--	--
TRINITY_DN103759_c0_g1_i1.path2	0	0	0	0.33	0.54	0.3	0	0	0	4	8	4	32.63	5.028	0.00365736	0.0114515	up	5A	430659384	430660287	-	TRINITY_DN103759_c0_g1_i1	--	K16084 ent-cassa-12,15-diene 11-hydroxylase / oryzalexin D synthase [EC:1.14.13.145 1.14.13.193] | (RAP-DB) Os02g0569400; Cytochrome P450 family protein. (A)	cytochrome P450 76M5-like [Aegilops tauschii subsp. tauschii]	RecName: Full=Cytochrome P450 76M5 {ECO:0000305}; EC=1.14.13.192 {ECO:0000269|PubMed:22215681};	SubName: Full=Uncharacterized protein {ECO:0000313|EnsemblPlants:TRIAE_CS42_5AL_TGACv1_374155_AA1191910.1};	Cytochrome P450 CYP2 subfamily	GO:0016021,integral component of membrane; GO:0016020,membrane; GO:0102597,3alpha-hydroxy-ent-sandaracopimardiene 9-beta-monooxygenase activity; GO:0020037,heme binding; GO:0005506,iron ion binding; GO:0004497,monooxygenase activity; GO:0016709,oxidoreductase activity, acting on paired donors, with incorporation or reduction of molecular oxygen, NAD(P)H as one donor, and incorporation of one atom…	Cytochrome P450
TRINITY_DN10376_c0_g1_i1.path1	8.83	7.88	9.53	46.87	37.15	49.28	38	42	42	186	181	219	5.629	2.493	4.76758e-16	7.93107e-15	up	1C	62292252	62293133	-	TRINITY_DN10376_c0_g1_i1	--	--	uncharacterized protein LOC109766512 [Aegilops tauschii subsp. tauschii]	--	SubName: Full=Uncharacterized protein {ECO:0000313|EnsemblPlants:TRIAE_CS42_1AL_TGACv1_001479_AA0031080.6};	--	--	--
TRINITY_DN10376_c0_g1_i1.path2	1.39	3.56	1.82	10.58	9.24	13.5	6	19	8	42	45	60	5.447	2.446	1.38082e-06	8.38368e-06	up	1D	249813772	249814714	+	TRINITY_DN10376_c0_g1_i1	--	--	uncharacterized protein LOC109766512 [Aegilops tauschii subsp. tauschii]	--	SubName: Full=Uncharacterized protein {ECO:0000313|EnsemblPlants:HORVU1Hr1G053340.2};	--	--	--
TRINITY_DN103762_c0_g1_i1.path1	4.38	3.54	2.25	0.25	1.22	0.45	19	19	10	1	6	2	0.211	-2.245	0.00941507	0.0261623	down	4C	510911466	510911845	+	TRINITY_DN103762_c0_g1_i1	--	--	--	RecName: Full=40S ribosomal protein S12;	--	--	GO:0005840,ribosome; GO:0003735,structural constituent of ribosome; GO:0006412,translation	--
TRINITY_DN10377_c0_g1_i2.path1	0.74	0.47	0.6	2.14	1.89	1.6	18	14	15	48	52	40	3.413	1.771	6.8438e-05	0.000315603	up	4A	403479642	403481175	-	TRINITY_DN10377_c0_g1_i2	--	--	predicted protein [Hordeum vulgare subsp. vulgare]	--	SubName: Full=Uncharacterized protein {ECO:0000313|EnsemblPlants:TRIAE_CS42_3AL_TGACv1_197360_AA0665990.1};	--	--	Protein of unknown function (DUF295)
TRINITY_DN103774_c0_g1_i1.path1	3.01	1.73	1.89	8.39	4.94	5.83	14	10	9	36	26	28	3.18	1.669	0.00208293	0.00698648	up	7C	655631858	655632151	-	TRINITY_DN103774_c0_g1_i1	--	--	--	--	--	--	--	--
TRINITY_DN103777_c0_g1_i1.path1	6.5	5.77	5.08	1.94	0.14	2.52	40	44	32	11	1	16	0.298	-1.749	0.00753907	0.0215394	down	5A	80078459	80078847	-	TRINITY_DN103777_c0_g1_i1	--	K01188 beta-glucosidase [EC:3.2.1.21] | (RefSeq) beta-glucosidase 11-like (A)	PREDICTED: zinc finger MYM-type protein 1-like [Brachypodium distachyon]	--	SubName: Full=Uncharacterized protein {ECO:0000313|EnsemblPlants:TRIUR3_24064-P1};	--	--	--
TRINITY_DN103785_c0_g1_i1.path1	6.09	6.55	4.25	0	0.26	0	21	28	15	0	1	0	0.02	-5.653	3.04583e-05	0.000149632	down	Chr00	61296201	61296418	+	TRINITY_DN103785_c0_g1_i1	--	--	--	--	--	--	--	--
TRINITY_DN103791_c0_g1_i1.path1	4.31	4.1	3.28	0.1	0.85	0.37	45	53	35	1	10	4	0.127	-2.973	1.64537e-06	9.8791e-06	down	1A	489708431	489709089	+	TRINITY_DN103791_c0_g1_i1	--	K04733 interleukin-1 receptor-associated kinase 4 [EC:2.7.11.1] | (RefSeq) probable L-type lectin-domain containing receptor kinase VI.1 (A)	PREDICTED: lectin-domain containing receptor kinase VI.3-like [Oryza brachyantha]	RecName: Full=L-type lectin-domain containing receptor kinase V.9; Short=LecRK-V.9; EC=2.7.11.1; Flags: Precursor;	SubName: Full=Uncharacterized protein {ECO:0000313|EnsemblPlants:OB10G23900.1};	--	GO:0016021,integral component of membrane; GO:0005886,plasma membrane; GO:0005524,ATP binding; GO:0030246,carbohydrate binding; GO:0004674,protein serine/threonine kinase activity	Legume lectin domain
TRINITY_DN103791_c0_g1_i1.path2	14.19	13.24	11.9	0.52	1.69	2.88	148	171	127	5	20	31	0.147	-2.765	3.64681e-10	3.48389e-09	down	1D	337361905	337362563	+	TRINITY_DN103791_c0_g1_i1	--	K04733 interleukin-1 receptor-associated kinase 4 [EC:2.7.11.1] | (RefSeq) L-type lectin-domain containing receptor kinase IV.2-like (A)	LOW QUALITY PROTEIN: L-type lectin-domain containing receptor kinase S.4-like [Setaria italica]	RecName: Full=L-type lectin-domain containing receptor kinase V.9; Short=LecRK-V.9; EC=2.7.11.1; Flags: Precursor;	SubName: Full=Uncharacterized protein {ECO:0000313|EnsemblPlants:TRIAE_CS42_1AL_TGACv1_000118_AA0003950.1};	--	GO:0016021,integral component of membrane; GO:0005886,plasma membrane; GO:0005524,ATP binding; GO:0030246,carbohydrate binding; GO:0004674,protein serine/threonine kinase activity	Legume lectin domain
TRINITY_DN103797_c0_g1_i1.path1	9.37	5.62	10.73	0.29	1.89	0.26	35	26	41	1	8	1	0.105	-3.253	1.50864e-05	7.80164e-05	down	6C	38467223	38467542	+	TRINITY_DN103797_c0_g1_i1	--	--	--	--	--	--	--	--
TRINITY_DN103806_c0_g1_i1.path1	4.56	5.52	6.91	15.59	8.87	14.58	20	30	31	63	44	66	2.537	1.343	0.00143869	0.00503092	up	4D	405142385	405142661	-	TRINITY_DN103806_c0_g1_i1	--	--	--	--	--	--	--	--
TRINITY_DN103808_c0_g1_i1.path1	4.17	1.87	2.94	0	1.02	0.22	18	10	13	0	5	1	0.156	-2.684	0.00870306	0.0244155	down	4A	229773322	229773594	-	TRINITY_DN103808_c0_g1_i1	--	--	--	--	--	--	--	--
TRINITY_DN10381_c1_g1_i1.path1	11.86	7.4	10.43	5.61	2.95	3.24	110	85	99	48	31	31	0.431	-1.215	0.00136986	0.00481503	down	1D	197906552	197907137	-	TRINITY_DN10381_c1_g1_i1	--	--	--	--	--	--	--	--
TRINITY_DN10382_c0_g2_i2.path1	0.27	0.48	0.32	0.68	1.11	1.13	9	20	11	21	42	39	3.018	1.593	0.0020979	0.00703037	up	2D	392787501	392789746	-	TRINITY_DN10382_c0_g2_i2	--	K14638 solute carrier family 15 (peptide/histidine transporter), member 3/4 | (RefSeq) LOC109744276; protein NRT1/ PTR FAMILY 4.6-like (A)	Nitrate transporter 1.2 [Triticum urartu]	RecName: Full=Protein NRT1/ PTR FAMILY 4.3; Short=AtNPF4.3; AltName: Full=Nitrate transporter 1.14;	SubName: Full=Nitrate transporter 1.2 {ECO:0000313|EMBL:EMS65849.1, ECO:0000313|EnsemblPlants:TRIUR3_34481-P1};	H+/oligopeptide symporter	GO:0016021,integral component of membrane; GO:0005886,plasma membrane; GO:0022857,transmembrane transporter activity; GO:0006857,oligopeptide transport; GO:0009624,response to nematode	--
TRINITY_DN10382_c2_g1_i3.path1	7.73	6.93	6.28	0.93	1.02	0.58	154	171	128	17	23	12	0.132	-2.924	8.5815e-17	1.5193e-15	down	2D	392847704	392850572	-	TRINITY_DN10382_c2_g1_i3	--	--	--	--	--	--	--	--
TRINITY_DN10382_c2_g1_i3.path2	1.99	1.69	1.1	0	0.27	0	39	41	22	0	6	0	0.065	-3.942	4.94844e-06	2.76389e-05	down	2A	344089345	344092185	+	TRINITY_DN10382_c2_g1_i3	--	--	--	--	--	--	--	--
TRINITY_DN10383_c0_g1_i18.path1	1.55	1.29	1.16	0.5	0.56	0.27	141	145	108	42	58	25	0.361	-1.471	8.95086e-06	4.80044e-05	down	1D	126338528	126347751	-	TRINITY_DN10383_c0_g1_i18	--	--	--	--	--	--	--	--
TRINITY_DN10383_c2_g1_i1.path1	2.35	1.03	1.24	0.32	0.17	0.09	24	13	13	3	2	1	0.136	-2.882	0.00178868	0.00610506	down	6D	75967652	75968297	-	TRINITY_DN10383_c2_g1_i1	--	--	--	--	--	--	--	--
TRINITY_DN103832_c0_g1_i1.path2	0	0	0	1.25	1.22	1.56	0	0	0	5	6	7	38.089	5.251	0.00155757	0.00539896	up	3A	312296054	312296327	+	TRINITY_DN103832_c0_g1_i1	--	--	--	--	--	--	--	--
TRINITY_DN103844_c0_g1_i1.path1	4.4	5.79	3.84	0.5	0.2	1.79	19	31	17	2	1	8	0.203	-2.301	0.00387369	0.0120386	down	4D	166589133	166589405	-	TRINITY_DN103844_c0_g1_i1	--	--	--	--	--	--	--	--
TRINITY_DN10385_c0_g1_i1.path1	4.33	5.71	4.72	1.3	1.33	1.35	112	183	125	31	39	36	0.297	-1.75	1.80587e-08	1.41546e-07	down	2D	389355612	389357245	+	TRINITY_DN10385_c0_g1_i1	--	--	--	--	--	--	--	--
TRINITY_DN103851_c0_g1_i1.path1	2.85	1.76	1.47	0	0.15	0	17	13	9	0	1	0	0.032	-4.974	0.000590555	0.00225835	down	4D	246200408	246200969	-	TRINITY_DN103851_c0_g1_i1	--	--	--	--	--	--	--	--
TRINITY_DN103855_c0_g1_i1.path1	0	0.44	0	3.73	3.16	3.86	0	4	0	25	26	29	24.663	4.624	1.06969e-06	6.60226e-06	up	6D	140876403	140876862	-	TRINITY_DN103855_c0_g1_i1	--	--	--	--	--	--	--	--
TRINITY_DN10386_c0_g1_i4.path1	1.99	2.51	2.11	7.59	6.47	10.25	104	163	113	366	383	554	4.118	2.042	3.15565e-13	4.1049e-12	up	3A	333585006	333590404	+	TRINITY_DN10386_c0_g1_i4	--	--	probable folate-biopterin transporter 4 isoform X2 [Aegilops tauschii subsp. tauschii]	RecName: Full=Probable folate-biopterin transporter 4;	SubName: Full=Uncharacterized protein {ECO:0000313|EnsemblPlants:HORVU3Hr1G033490.1};	--	GO:0016021,integral component of membrane	BT1 family
TRINITY_DN10386_c0_g1_i4.path2	1.24	1.74	1.72	9.57	7.17	10.55	65	113	92	462	425	570	6.452	2.69	4.75513e-22	1.2209e-20	up	3D	44042717	44048200	+	TRINITY_DN10386_c0_g1_i4	--	--	hypothetical protein BRADI_2g08527v3 [Brachypodium distachyon]	RecName: Full=Probable folate-biopterin transporter 4;	SubName: Full=Uncharacterized protein {ECO:0000313|EnsemblPlants:HORVU3Hr1G033490.1};	--	GO:0016021,integral component of membrane	BT1 family
TRINITY_DN103864_c0_g1_i1.path1	7.86	3.51	6.37	0.36	0	0	47	26	39	2	0	0	0.02	-5.635	1.2915e-06	7.87682e-06	down	6D	297098547	297099213	-	TRINITY_DN103864_c0_g1_i1	--	--	predicted protein, partial [Hordeum vulgare subsp. vulgare]	--	SubName: Full=Uncharacterized protein {ECO:0000313|EnsemblPlants:HORVU6Hr1G093680.16};	--	--	--
TRINITY_DN103869_c0_g1_i1.path1	4.41	3.89	4.31	0.45	1.36	0.6	43	47	43	4	15	6	0.21	-2.251	3.50357e-05	0.000170243	down	6A	83654370	83654985	-	TRINITY_DN103869_c0_g1_i1	--	--	--	--	--	--	--	--
TRINITY_DN10387_c0_g1_i4.path1	8.68	9.32	8.75	0.76	2.21	1.17	497	661	513	40	143	69	0.169	-2.565	3.83516e-16	6.42008e-15	down	4C	494280845	494284537	-	TRINITY_DN10387_c0_g1_i4	--	K17964 leucine-rich PPR motif-containing protein, mitochondrial | (RefSeq) pentatricopeptide repeat-containing protein At3g22470, mitochondrial-like (A)	predicted protein [Hordeum vulgare subsp. vulgare]	RecName: Full=Pentatricopeptide repeat-containing protein At4g31850, chloroplastic; AltName: Full=Protein PROTON GRADIENT REGULATION 3; Flags: Precursor;	SubName: Full=Uncharacterized protein {ECO:0000313|EnsemblPlants:HORVU4Hr1G011420.3};	FOG: PPR repeat	GO:0009507,chloroplast; GO:0043231,intracellular membrane-bounded organelle; GO:0004519,endonuclease activity; GO:0003723,RNA binding; GO:0009451,RNA modification	PPR repeat family
TRINITY_DN10387_c0_g1_i4.path2	11.01	13.59	11.67	0.7	2.34	0.59	631	964	684	37	152	35	0.108	-3.212	8.77985e-18	1.68305e-16	down	4D	277000153	277003846	-	TRINITY_DN10387_c0_g1_i4	--	K17964 leucine-rich PPR motif-containing protein, mitochondrial | (RefSeq) protein Rf1, mitochondrial-like (A)	pentatricopeptide repeat-containing protein At4g31850, chloroplastic [Aegilops tauschii subsp. tauschii]	RecName: Full=Pentatricopeptide repeat-containing protein At4g31850, chloroplastic; AltName: Full=Protein PROTON GRADIENT REGULATION 3; Flags: Precursor;	SubName: Full=Uncharacterized protein {ECO:0000313|EnsemblPlants:TRIAE_CS42_4DS_TGACv1_361126_AA1161650.1};	FOG: PPR repeat	GO:0009507,chloroplast; GO:0043231,intracellular membrane-bounded organelle; GO:0004519,endonuclease activity; GO:0003723,RNA binding; GO:0009451,RNA modification	PPR repeat family
TRINITY_DN10387_c0_g1_i4.path3	17.66	18.57	18.48	0.44	1.27	0.41	1006	1310	1077	23	82	24	0.042	-4.571	2.29753e-44	1.84129e-42	down	4A	280854492	280858164	-	TRINITY_DN10387_c0_g1_i4	--	K17964 leucine-rich PPR motif-containing protein, mitochondrial | (RefSeq) hypothetical protein (A)	predicted protein [Hordeum vulgare subsp. vulgare]	RecName: Full=Pentatricopeptide repeat-containing protein At4g31850, chloroplastic; AltName: Full=Protein PROTON GRADIENT REGULATION 3; Flags: Precursor;	SubName: Full=Uncharacterized protein {ECO:0000313|EnsemblPlants:HORVU4Hr1G011420.4};	FOG: PPR repeat	GO:0009507,chloroplast; GO:0043231,intracellular membrane-bounded organelle; GO:0004519,endonuclease activity; GO:0003723,RNA binding; GO:0009451,RNA modification	PPR repeat family
TRINITY_DN103877_c0_g1_i1.path1	0.45	0.54	0.66	2.68	3.97	3.7	2	3	3	11	20	17	6.93	2.793	0.000726734	0.00272463	up	2D	355131961	355132241	+	TRINITY_DN103877_c0_g1_i1	--	--	--	--	--	--	--	--
TRINITY_DN103888_c0_g1_i1.path1	0	0	0	0.51	3.09	1.58	0	0	0	2	15	7	47.744	5.577	0.000680382	0.00256697	up	1C	132357159	132357429	-	TRINITY_DN103888_c0_g1_i1	--	--	PR17d precursor [Hordeum vulgare subsp. vulgare]	RecName: Full=Basic secretory protease {ECO:0000303|PubMed:22773449}; EC=3.4.24.- {ECO:0000269|PubMed:22773449}; AltName: Full=Boswellia basic secretory protease {ECO:0000303|PubMed:22773449}; Short=BBSP {ECO:0000303|PubMed:22773449}; Flags: Fragments;	SubName: Full=PR17d {ECO:0000313|EMBL:ABV22584.1, ECO:0000313|EnsemblPlants:HORVU1Hr1G043920.1}; SubName: Full=Predicted protein {ECO:0000313|EMBL:BAK03040.1};	--	GO:0046872,metal ion binding; GO:0008237,metallopeptidase activity	--
TRINITY_DN103890_c0_g1_i1.path1	1.55	3.76	6.25	0.63	1.54	0.75	8	24	33	3	9	4	0.276	-1.86	0.0143574	0.0375719	down	3D	322645323	322645648	+	TRINITY_DN103890_c0_g1_i1	--	--	--	--	--	--	--	--
TRINITY_DN103891_c0_g1_i1.path1	9.25	10.88	7.28	25.76	21.87	35.48	46	67	37	118	123	182	3.4	1.765	1.82974e-07	1.25753e-06	up	2C	532401464	532401777	+	TRINITY_DN103891_c0_g1_i1	--	--	--	--	--	--	--	--
TRINITY_DN103892_c0_g1_i1.path1	0.4	0.64	0	1.51	2.81	2.12	2	4	0	7	16	11	6.755	2.756	0.00664361	0.0192999	up	6D	248804698	248805015	+	TRINITY_DN103892_c0_g1_i1	--	--	--	--	--	--	--	--
TRINITY_DN103897_c0_g1_i1.path1	15.31	9.21	14.14	0.6	0.49	1.08	55	41	52	2	2	4	0.062	-4.02	6.17659e-09	5.12891e-08	down	5D	105611404	105611630	-	TRINITY_DN103897_c0_g1_i1	--	K13420 LRR receptor-like serine/threonine-protein kinase FLS2 [EC:2.7.11.1] | (RefSeq) hypothetical protein (A)	probable LRR receptor-like serine/threonine-protein kinase At3g47570 isoform X1 [Aegilops tauschii subsp. tauschii]	RecName: Full=LRR receptor-like serine/threonine-protein kinase EFR; EC=2.7.11.1; AltName: Full=Elongation factor Tu receptor; Short=EF-Tu receptor; Flags: Precursor;	SubName: Full=Uncharacterized protein {ECO:0000313|EnsemblPlants:TRIAE_CS42_7DL_TGACv1_602658_AA1964320.1};	--	GO:0012505,endomembrane system; GO:0016021,integral component of membrane; GO:0005886,plasma membrane; GO:0005524,ATP binding; GO:0004674,protein serine/threonine kinase activity; GO:0019199,transmembrane receptor protein kinase activity; GO:0010204,defense response signaling pathway, resistance gene-independent; GO:0016045,detection of bacterium; GO:0002764,immune response-regulating signaling p…	--
TRINITY_DN103897_c0_g1_i1.path3	16.92	12.75	17.64	0.92	1.74	0	60	56	64	3	7	0	0.061	-4.025	5.78839e-10	5.40612e-09	down	5C	135373209	135373432	-	TRINITY_DN103897_c0_g1_i1	--	K13420 LRR receptor-like serine/threonine-protein kinase FLS2 [EC:2.7.11.1] | (RefSeq) hypothetical protein (A)	probable LRR receptor-like serine/threonine-protein kinase At3g47570 isoform X1 [Aegilops tauschii subsp. tauschii]	RecName: Full=LRR receptor-like serine/threonine-protein kinase EFR; EC=2.7.11.1; AltName: Full=Elongation factor Tu receptor; Short=EF-Tu receptor; Flags: Precursor;	SubName: Full=Uncharacterized protein {ECO:0000313|EnsemblPlants:TRIAE_CS42_7DL_TGACv1_602658_AA1964320.1};	--	GO:0012505,endomembrane system; GO:0016021,integral component of membrane; GO:0005886,plasma membrane; GO:0005524,ATP binding; GO:0004674,protein serine/threonine kinase activity; GO:0019199,transmembrane receptor protein kinase activity; GO:0010204,defense response signaling pathway, resistance gene-independent; GO:0016045,detection of bacterium; GO:0002764,immune response-regulating signaling p…	--
TRINITY_DN1039_c0_g2_i2.path1	0.93	1.55	1.94	2.47	2.86	2.86	29	60	62	71	101	92	2.033	1.024	0.00436486	0.0133661	up	2D	325845352	325848890	-	TRINITY_DN1039_c0_g2_i2	--	K20783 arabinosyltransferase [EC:2.4.2.-] | (RefSeq) arabinosyltransferase RRA2-like (A)	PREDICTED: arabinosyltransferase RRA2-like [Brachypodium distachyon]	RecName: Full=Arabinosyltransferase RRA3 {ECO:0000305}; EC=2.4.2.- {ECO:0000305}; AltName: Full=Protein REDUCED RESIDUAL ARABINOSE 3 {ECO:0000303|PubMed:21680836};	RecName: Full=Glycosyltransferase {ECO:0000256|RuleBase:RU363055}; EC=2.4.2.- {ECO:0000256|RuleBase:RU363055};	--	GO:0005768,endosome; GO:0005794,Golgi apparatus; GO:0000139,Golgi membrane; GO:0016021,integral component of membrane; GO:0005802,trans-Golgi network; GO:0016757,transferase activity, transferring glycosyl groups; GO:0042546,cell wall biogenesis; GO:0071555,cell wall organization; GO:0080147,root hair cell development	Nucleotide-diphospho-sugar transferase
TRINITY_DN103904_c0_g1_i1.path1	1.4	3.1	3.41	16.09	31	18.6	8	22	20	85	201	110	9.026	3.174	8.85177e-15	1.32912e-13	up	5C	470433594	470433955	+	TRINITY_DN103904_c0_g1_i1	--	K01087 trehalose 6-phosphate phosphatase [EC:3.1.3.12] | (RefSeq) LOC109775940; probable trehalose-phosphate phosphatase 7 (A)	Trehalose-phosphate phosphatase [Triticum urartu]	RecName: Full=Probable trehalose-phosphate phosphatase 6; Short=OsTPP6; EC=3.1.3.12; AltName: Full=Trehalose 6-phosphate phosphatase;	RecName: Full=Trehalose 6-phosphate phosphatase {ECO:0000256|RuleBase:RU361117}; EC=3.1.3.12 {ECO:0000256|RuleBase:RU361117};	Trehalose-6-phosphate synthase component TPS1 and related subunits	GO:0004805,trehalose-phosphatase activity; GO:0005992,trehalose biosynthetic process	Trehalose-phosphatase
TRINITY_DN10391_c0_g2_i2.path1	2.51	1.91	1.62	6.82	7.68	4.86	71	67	47	178	246	142	3.495	1.805	3.48958e-10	3.34019e-09	up	4D	310868912	310872001	+	TRINITY_DN10391_c0_g2_i2	--	K01102 pyruvate dehydrogenase phosphatase [EC:3.1.3.43] | (RefSeq) LOC109752989; probable protein phosphatase 2C 36 (A)	probable protein phosphatase 2C 36 [Aegilops tauschii subsp. tauschii]	RecName: Full=Probable protein phosphatase 2C 36; Short=OsPP2C36; EC=3.1.3.16;	SubName: Full=Uncharacterized protein {ECO:0000313|EnsemblPlants:TRIAE_CS42_4AL_TGACv1_290422_AA0985210.1};	Protein phosphatase 2C/pyruvate dehydrogenase (lipoamide) phosphatase	GO:0046872,metal ion binding; GO:0004722,protein serine/threonine phosphatase activity	--
TRINITY_DN10391_c0_g2_i2.path2	1.94	2.25	2.1	9.52	9.38	9.9	55	79	61	249	301	290	5.055	2.338	4.63971e-20	1.03964e-18	up	4A	315769741	315772826	+	TRINITY_DN10391_c0_g2_i2	--	--	--	--	--	--	--	--
TRINITY_DN103916_c0_g1_i1.path1	7.3	13.95	13.89	0.42	0.68	0.74	38	90	74	2	4	4	0.058	-4.105	6.97131e-11	7.19658e-10	down	7C	646440189	646440517	-	TRINITY_DN103916_c0_g1_i1	--	--	--	--	--	--	--	--
TRINITY_DN103923_c0_g1_i1.path3	5.71	5.24	3.65	33.74	26.96	26.12	29	33	19	158	155	137	6.537	2.709	4.72652e-17	8.57505e-16	up	2C	60808456	60808776	+	TRINITY_DN103923_c0_g1_i1	--	--	--	--	--	--	--	--
TRINITY_DN103925_c0_g1_i1.path1	0	0	0	1.1	0.9	0.74	0	0	0	4	4	3	23.055	4.527	0.0171423	0.0437891	up	Chr00	73896489	73896737	+	TRINITY_DN103925_c0_g1_i1	--	--	--	--	--	--	--	--
TRINITY_DN103927_c0_g1_i1.path1	1.1	4.1	4.75	23.25	32.99	18.83	5	23	22	97	169	88	8.137	3.024	1.95001e-12	2.34588e-11	up	6C	68159309	68159594	+	TRINITY_DN103927_c0_g1_i1	--	--	--	--	--	--	--	--
TRINITY_DN103942_c0_g1_i1.path1	2.04	1.24	0.83	3.7	5.87	4.45	12	9	5	20	39	27	3.775	1.916	0.000925228	0.00338767	up	1C	235254229	235254599	+	TRINITY_DN103942_c0_g1_i1	--	--	--	--	--	--	--	--
TRINITY_DN103956_c0_g1_i1.path1	1.43	1.54	1.16	6.98	2.53	3.46	6	8	5	27	12	15	3.421	1.775	0.0109097	0.0297134	up	7D	60002350	60002614	+	TRINITY_DN103956_c0_g1_i1	--	--	--	--	--	--	--	--
TRINITY_DN103957_c0_g1_i1.path1	0	0	0	1.08	3.28	2.64	0	0	0	4	15	11	61.4	5.94	0.000102478	0.000456702	up	3D	343793642	343793896	+	TRINITY_DN103957_c0_g1_i1	--	--	--	--	--	--	--	--
TRINITY_DN10396_c2_g2_i1.path1	0.59	0.05	0.17	0	0	0	10	1	3	0	0	0	0.043	-4.547	0.0182783	0.0461904	down	2A	89370470	89371547	+	TRINITY_DN10396_c2_g2_i1	--	--	--	--	--	--	--	--
TRINITY_DN103966_c0_g1_i1.path3	5.6	7.54	7.45	27.18	27.23	22.16	36	60	49	161	198	147	4.064	2.023	9.39381e-13	1.16718e-11	up	3C	458998310	458998877	-	TRINITY_DN103966_c0_g1_i1	--	--	--	--	--	--	--	--
TRINITY_DN10397_c0_g1_i1.path1	0	0.3	0	1.23	0.61	1.76	0	6	0	18	11	29	12.779	3.676	0.000215117	0.000902419	up	1A	240773565	240774570	+	TRINITY_DN10397_c0_g1_i1	--	--	hypothetical protein TRIUR3_29795 [Triticum urartu]	--	SubName: Full=Uncharacterized protein {ECO:0000313|EMBL:EMS58436.1, ECO:0000313|EnsemblPlants:TRIUR3_29795-P1};	--	--	--
TRINITY_DN103975_c0_g1_i1.path2	5.3	6.78	5.93	12.05	14.16	9.39	41	65	47	86	124	75	2.156	1.108	0.000378312	0.00151015	up	2D	54092068	54092556	+	TRINITY_DN103975_c0_g1_i1	--	--	--	--	--	--	--	--
TRINITY_DN103986_c0_g1_i1.path1	0.2	0.49	0.6	3.09	1.44	1.77	1	3	3	14	8	9	5.288	2.403	0.0124074	0.033163	up	5A	124628107	124628417	-	TRINITY_DN103986_c0_g1_i1	--	K13459 disease resistance protein RPS2 | (RefSeq) disease resistance protein RPS2-like (A)	hypothetical protein BRADI_5g01205v3 [Brachypodium distachyon]	--	SubName: Full=Uncharacterized protein {ECO:0000313|EMBL:KQJ81515.1}; Flags: Fragment;	--	GO:0043531,ADP binding	--
TRINITY_DN103989_c0_g1_i1.path1	1.76	0.47	0	9.76	6.91	6.44	9	3	0	46	40	34	11.572	3.533	2.6298e-07	1.76964e-06	up	2A	173669571	173669893	+	TRINITY_DN103989_c0_g1_i1	--	--	--	--	--	--	--	--
TRINITY_DN10399_c0_g1_i1.path1	5.47	6.83	5.35	24.29	20.95	30.2	33	51	33	135	143	188	4.763	2.252	4.20701e-12	4.9009e-11	up	2C	488808228	488812988	+	TRINITY_DN10399_c0_g1_i1	--	--	--	--	--	--	--	--
TRINITY_DN1040_c0_g1_i1.path1	0	0	0	4.36	4.54	10.83	0	0	0	125	160	348	1373.25	10.423	7.88109e-17	1.40143e-15	up	6A	423681536	423683502	-	TRINITY_DN1040_c0_g1_i1	--	--	--	--	--	--	--	--
TRINITY_DN1040_c0_g1_i1.path2	0	0.21	0.06	42.84	39.55	76.76	0	8	2	1220	1383	2448	652.788	9.35	6.78719e-23	1.84166e-21	up	4A	356482909	356484860	+	TRINITY_DN1040_c0_g1_i1	--	--	--	--	--	--	--	--
TRINITY_DN1040_c0_g1_i1.path3	0	0	0	1.99	1.56	3.36	0	0	0	57	55	108	475.694	8.894	2.0056e-12	2.40995e-11	up	5D	407016670	407018635	+	TRINITY_DN1040_c0_g1_i1	--	--	--	--	--	--	--	--
TRINITY_DN10400_c0_g1_i6.path1	1.04	0.98	0.6	2.47	2.91	4.96	37	43	22	81	117	182	4.463	2.158	4.89602e-08	3.62924e-07	up	5D	286849970	286853540	-	TRINITY_DN10400_c0_g1_i6	--	--	uncharacterized protein LOC109787150 [Aegilops tauschii subsp. tauschii]	--	SubName: Full=Uncharacterized protein {ECO:0000313|EnsemblPlants:TRIAE_CS42_5AL_TGACv1_374029_AA1188270.1};	Predicted transporter ADD1 (major facilitator superfamily)	GO:0016021,integral component of membrane; GO:0005215,transporter activity; GO:0055085,transmembrane transport	Major Facilitator Superfamily
TRINITY_DN104007_c0_g1_i1.path1	85.88	92.61	85.64	427.36	282.74	494.99	295	394	301	1353	1099	1755	5.102	2.351	1.10543e-18	2.24915e-17	up	3C	1378988	1379204	-	TRINITY_DN104007_c0_g1_i1	--	--	--	--	--	--	--	--
TRINITY_DN104013_c0_g1_i1.path1	0	0.85	2.05	5.4	1.85	5.08	0	4	8	19	8	20	4.689	2.229	0.0128789	0.034226	up	1A	472270593	472270833	-	TRINITY_DN104013_c0_g1_i1	--	--	--	--	--	--	--	--
TRINITY_DN104016_c0_g1_i1.path1	3.48	2.34	4.25	0	0	0	12	10	15	0	0	0	0.017	-5.887	6.52293e-05	0.000301928	down	5C	555513339	555513766	+	TRINITY_DN104016_c0_g1_i1	--	K12309 beta-galactosidase [EC:3.2.1.23] | (RefSeq) beta-galactosidase 2 isoform X1 (A)	PREDICTED: beta-galactosidase 12-like isoform X2 [Brachypodium distachyon]	RecName: Full=Beta-galactosidase 12; Short=Lactase 12; EC=3.2.1.23; Flags: Precursor;	RecName: Full=Beta-galactosidase {ECO:0000256|RuleBase:RU000675}; EC=3.2.1.23 {ECO:0000256|RuleBase:RU000675};	Beta-galactosidase	GO:0048046,apoplast; GO:0005618,cell wall; GO:0005773,vacuole; GO:0004565,beta-galactosidase activity; GO:0030246,carbohydrate binding; GO:0005975,carbohydrate metabolic process	--
TRINITY_DN10402_c0_g1_i3.path1	2.53	3	3.32	0.8	0.92	0.73	161	236	216	47	66	48	0.303	-1.723	8.83884e-10	8.10314e-09	down	6D	281276068	281282791	+	TRINITY_DN10402_c0_g1_i3	--	K13172 serine/arginine repetitive matrix protein 2 | (RefSeq) uncharacterized protein LOC111450450 isoform X1 (A)	serine/arginine repetitive matrix protein 2-like [Aegilops tauschii subsp. tauschii]	RecName: Full=AUGMIN subunit 8 {ECO:0000303|PubMed:22505726}; AltName: Full=QWRF motif-containing protein 8 {ECO:0000303|PubMed:20978221}; AltName: Full=ROP1 enhancer 2 {ECO:0000303|PubMed:23735294};	SubName: Full=Uncharacterized protein {ECO:0000313|EnsemblPlants:HORVU6Hr1G084700.3};	--	GO:0005874,microtubule; GO:0007049,cell cycle; GO:0051301,cell division	QWRF family
TRINITY_DN104023_c0_g1_i1.path1	0.75	0.6	0.85	3.24	1.76	3.98	6	6	7	24	16	33	4.57	2.192	0.00073975	0.00276752	up	3C	539383837	539384343	-	TRINITY_DN104023_c0_g1_i1	--	--	--	--	--	--	--	--
TRINITY_DN10404_c0_g1_i1.path2	0.11	0.11	0.09	0.64	0.23	0.49	5	6	4	27	12	23	5.001	2.322	0.00104018	0.00376343	up	5A	455478015	455483520	+	TRINITY_DN10404_c0_g1_i1	--	--	predicted protein [Hordeum vulgare subsp. vulgare]	--	SubName: Full=Predicted protein {ECO:0000313|EMBL:BAJ93136.1, ECO:0000313|EnsemblPlants:HORVU5Hr1G077150.1};	Uncharacterized conserved protein	--	Chromosome segregation during meiosis
TRINITY_DN10404_c0_g1_i1.path3	0	0	0.02	0.12	0.23	0.04	0	0	1	5	12	2	19.282	4.269	0.0102841	0.0282335	up	5C	543144647	543149739	+	TRINITY_DN10404_c0_g1_i1	--	--	predicted protein [Hordeum vulgare subsp. vulgare]	--	SubName: Full=Predicted protein {ECO:0000313|EMBL:BAJ93136.1, ECO:0000313|EnsemblPlants:HORVU5Hr1G077150.1};	Uncharacterized conserved protein	--	Chromosome segregation during meiosis
TRINITY_DN10404_c0_g2_i3.path1	2.04	2.42	2.59	6.93	6.24	8.77	117	172	152	366	405	519	3.458	1.79	1.93236e-11	2.11136e-10	up	7D	58771830	58776747	+	TRINITY_DN10404_c0_g2_i3	--	--	predicted protein [Hordeum vulgare subsp. vulgare]	--	SubName: Full=Uncharacterized protein {ECO:0000313|EnsemblPlants:TRIAE_CS42_U_TGACv1_641537_AA2097400.5};	Uncharacterized conserved protein	--	Domain of unknown function (DUF4210)
TRINITY_DN10405_c0_g1_i1.path1	0.11	0.43	0.26	1.33	0.85	2.38	2	10	5	23	18	46	6.412	2.681	0.000109285	0.000484283	up	3C	4748909	4750093	-	TRINITY_DN10405_c0_g1_i1	--	K14638 solute carrier family 15 (peptide/histidine transporter), member 3/4 | (RefSeq) LOC109786637; protein NRT1/ PTR FAMILY 8.1-like (A)	predicted protein, partial [Hordeum vulgare subsp. vulgare]	RecName: Full=Protein NRT1/ PTR FAMILY 8.2; Short=AtNPF8.2; AltName: Full=Peptide transporter PTR5;	SubName: Full=Uncharacterized protein {ECO:0000313|EnsemblPlants:HORVU3Hr1G010570.8};	H+/oligopeptide symporter	GO:0016021,integral component of membrane; GO:0005886,plasma membrane; GO:0042936,NA; GO:0022857,transmembrane transporter activity; GO:0042938,dipeptide transport; GO:0009860,pollen tube growth; GO:0015031,protein transport	POT family
TRINITY_DN10405_c0_g1_i1.path2	0.21	0.3	0.16	1.1	1.46	1.45	4	7	3	19	31	28	6.576	2.717	3.34197e-05	0.000162926	up	Chr00	194640329	194641513	+	TRINITY_DN10405_c0_g1_i1	--	K14638 solute carrier family 15 (peptide/histidine transporter), member 3/4 | (RefSeq) LOC109786637; protein NRT1/ PTR FAMILY 8.1-like (A)	predicted protein, partial [Hordeum vulgare subsp. vulgare]	RecName: Full=Protein NRT1/ PTR FAMILY 8.2; Short=AtNPF8.2; AltName: Full=Peptide transporter PTR5;	SubName: Full=Uncharacterized protein {ECO:0000313|EnsemblPlants:HORVU3Hr1G010570.8};	H+/oligopeptide symporter	GO:0016021,integral component of membrane; GO:0005886,plasma membrane; GO:0042936,NA; GO:0022857,transmembrane transporter activity; GO:0042938,dipeptide transport; GO:0009860,pollen tube growth; GO:0015031,protein transport	POT family
TRINITY_DN104051_c0_g1_i1.path1	1.31	1.17	0.77	9.69	12.88	10.82	10	11	6	68	111	85	11.332	3.502	1.2925e-15	2.08099e-14	up	6D	202115443	202115923	+	TRINITY_DN104051_c0_g1_i1	--	--	--	--	--	--	--	--
TRINITY_DN10406_c0_g2_i4.path1	4.9	3.81	4.18	1.15	1.24	1.12	157	151	137	34	45	37	0.299	-1.743	1.54322e-08	1.21782e-07	down	7C	212431452	212435241	+	TRINITY_DN10406_c0_g2_i4	--	--	--	--	--	--	--	--
TRINITY_DN104062_c0_g1_i1.path1	1.55	1.07	1.52	0	0.2	0	7	6	7	0	1	0	0.061	-4.025	0.0128918	0.0342535	down	4C	355472488	355472772	-	TRINITY_DN104062_c0_g1_i1	--	--	--	--	--	--	--	--
TRINITY_DN104065_c0_g1_i1.path1	3.6	4.3	1.41	0.78	0.89	0.42	25	37	10	5	7	3	0.247	-2.018	0.00476114	0.0144133	down	4A	410779274	410779712	+	TRINITY_DN104065_c0_g1_i1	--	--	--	--	--	--	--	--
TRINITY_DN104066_c0_g1_i1.path1	7.22	8.08	9.21	2.56	2.21	2.28	49	68	64	16	17	16	0.315	-1.668	7.43382e-05	0.000340234	down	Chr00	163193777	163194381	-	TRINITY_DN104066_c0_g1_i1	--	--	--	--	--	--	--	--
TRINITY_DN104070_c0_g1_i1.path1	0	0	0	0.57	1.16	0.64	0	0	0	4	10	5	38.56	5.269	0.00155471	0.00539026	up	3C	511912276	511912756	-	TRINITY_DN104070_c0_g1_i1	--	--	--	--	--	--	--	--
TRINITY_DN10408_c0_g1_i1.path1	5.61	6.27	5.58	42.46	34.68	46.16	52	72	53	363	364	442	7.843	2.971	2.83185e-28	1.06552e-26	up	4C	355076858	355078072	+	TRINITY_DN10408_c0_g1_i1	--	K15103 solute carrier family 25 (mitochondrial uncoupling protein), member 8/9 | (RefSeq) LOC109757779; mitochondrial uncoupling protein 1-like (A)	mitochondrial uncoupling protein 1-like [Aegilops tauschii subsp. tauschii]	RecName: Full=Mitochondrial uncoupling protein 1; Short=AtPUMP1;	SubName: Full=Uncharacterized protein {ECO:0000313|EnsemblPlants:TRIAE_CS42_4DS_TGACv1_361915_AA1174250.3};	Mitochondrial fatty acid anion carrier protein/Uncoupling protein	GO:0009507,chloroplast; GO:0016021,integral component of membrane; GO:0005743,mitochondrial inner membrane; GO:0005739,mitochondrion; GO:0009506,plasmodesma; GO:0005774,vacuolar membrane; GO:0017077,oxidative phosphorylation uncoupler activity; GO:1990542,mitochondrial transmembrane transport; GO:0006839,mitochondrial transport; GO:0009853,photorespiration	Mitochondrial carrier protein
TRINITY_DN104080_c0_g1_i1.path1	63.17	52.6	53.81	13.8	11.82	11.26	288	297	251	58	61	53	0.238	-2.071	4.2429e-15	6.55041e-14	down	6A	330902120	330902407	-	TRINITY_DN104080_c0_g1_i1	--	--	--	--	--	--	--	--
TRINITY_DN104089_c0_g1_i1.path1	2.4	3.39	5.08	17.57	22.44	31.18	12	21	26	81	127	161	7.302	2.868	3.66168e-12	4.29301e-11	up	4D	302923531	302923846	+	TRINITY_DN104089_c0_g1_i1	--	K14674 TAG lipase / steryl ester hydrolase / phospholipase A2 / LPA acyltransferase [EC:3.1.1.3 3.1.1.13 3.1.1.4 2.3.1.51] | (RefSeq) LOC109784727; triacylglycerol lipase SDP1-like (A)	Triacylglycerol lipase SDP1 [Triticum urartu]	RecName: Full=Triacylglycerol lipase SDP1; EC=3.1.1.3; AltName: Full=Protein SUGAR-DEPENDENT 1;	RecName: Full=Patatin {ECO:0000256|RuleBase:RU361262}; EC=3.1.1.- {ECO:0000256|RuleBase:RU361262};	Predicted esterase of the alpha-beta hydrolase superfamily	GO:0016021,integral component of membrane; GO:0012511,monolayer-surrounded lipid storage body; GO:0004806,triglyceride lipase activity; GO:0006071,glycerol metabolic process; GO:0019433,triglyceride catabolic process; GO:0006641,triglyceride metabolic process	--
TRINITY_DN104089_c0_g1_i1.path2	3.2	4.04	3.32	31.45	39.75	50.36	16	25	17	145	225	260	12.837	3.682	4.99292e-25	1.55299e-23	up	4A	307482108	307482423	+	TRINITY_DN104089_c0_g1_i1	--	K14674 TAG lipase / steryl ester hydrolase / phospholipase A2 / LPA acyltransferase [EC:3.1.1.3 3.1.1.13 3.1.1.4 2.3.1.51] | (RefSeq) LOC109784727; triacylglycerol lipase SDP1-like (A)	Triacylglycerol lipase SDP1 [Triticum urartu]	RecName: Full=Triacylglycerol lipase SDP1; EC=3.1.1.3; AltName: Full=Protein SUGAR-DEPENDENT 1;	RecName: Full=Patatin {ECO:0000256|RuleBase:RU361262}; EC=3.1.1.- {ECO:0000256|RuleBase:RU361262};	Predicted esterase of the alpha-beta hydrolase superfamily	GO:0016021,integral component of membrane; GO:0012511,monolayer-surrounded lipid storage body; GO:0004806,triglyceride lipase activity; GO:0006071,glycerol metabolic process; GO:0019433,triglyceride catabolic process; GO:0006641,triglyceride metabolic process	--
TRINITY_DN104089_c0_g1_i1.path3	0.39	0	0.57	1.68	4.28	2.44	2	0	3	8	25	13	9.883	3.305	0.000876179	0.0032243	up	4C	522359818	522360143	+	TRINITY_DN104089_c0_g1_i1	--	K14674 TAG lipase / steryl ester hydrolase / phospholipase A2 / LPA acyltransferase [EC:3.1.1.3 3.1.1.13 3.1.1.4 2.3.1.51] | (RefSeq) LOC109784727; triacylglycerol lipase SDP1-like (A)	Triacylglycerol lipase SDP1 [Triticum urartu]	RecName: Full=Triacylglycerol lipase SDP1; EC=3.1.1.3; AltName: Full=Protein SUGAR-DEPENDENT 1;	RecName: Full=Patatin {ECO:0000256|RuleBase:RU361262}; EC=3.1.1.- {ECO:0000256|RuleBase:RU361262};	Predicted esterase of the alpha-beta hydrolase superfamily	GO:0016021,integral component of membrane; GO:0012511,monolayer-surrounded lipid storage body; GO:0004806,triglyceride lipase activity; GO:0006071,glycerol metabolic process; GO:0019433,triglyceride catabolic process; GO:0006641,triglyceride metabolic process	--
TRINITY_DN104092_c0_g1_i1.path2	0	0	0	1.07	0.65	3.83	0	0	0	4	3	16	51.146	5.677	0.000573862	0.00220202	up	4A	430347310	430347565	+	TRINITY_DN104092_c0_g1_i1	--	--	--	--	--	--	--	--
TRINITY_DN104093_c0_g1_i1.path2	40.99	37.73	31.38	71.37	77.05	81.18	157	179	123	252	334	321	2.309	1.207	5.14273e-07	3.32443e-06	up	2D	421301126	421301367	-	TRINITY_DN104093_c0_g1_i1	--	--	--	--	--	--	--	--
TRINITY_DN104095_c0_g1_i1.path1	2.07	2.74	2.76	9.82	11.83	9.87	11	18	15	48	71	54	4.561	2.189	2.43116e-07	1.64417e-06	up	5D	331390687	331391021	+	TRINITY_DN104095_c0_g1_i1	--	--	--	--	--	--	--	--
TRINITY_DN104095_c0_g1_i1.path2	3.02	3.5	2.76	12.69	9	10.78	16	23	15	62	54	59	3.851	1.945	2.55324e-06	1.48746e-05	up	5A	366403611	366403945	+	TRINITY_DN104095_c0_g1_i1	--	--	--	--	--	--	--	--
TRINITY_DN10410_c0_g1_i3.path1	393.46	374.27	400.46	162.52	167.09	183.91	8981	10581	9353	3419	4316	4333	0.485	-1.044	1.45114e-07	1.01135e-06	down	4C	514030790	514033184	-	TRINITY_DN10410_c0_g1_i3	--	K13348 protein Mpv17 | (RefSeq) uncharacterized LOC100846887 (A)	PREDICTED: uncharacterized protein LOC100846887 [Brachypodium distachyon]	--	SubName: Full=Uncharacterized protein {ECO:0000313|EMBL:KQK14324.1, ECO:0000313|EnsemblPlants:BRADI1G15450.1};	Peroxisomal membrane protein MPV17 and related proteins	GO:0005737,cytoplasm; GO:0016021,integral component of membrane	Mpv17 / PMP22 family
TRINITY_DN104106_c0_g1_i1.path1	3.02	6.35	3.99	31.32	16.69	28.99	20	52	27	191	125	198	6.412	2.681	7.71474e-13	9.66418e-12	up	1A	425847081	425847498	+	TRINITY_DN104106_c0_g1_i1	--	K01061 carboxymethylenebutenolidase [EC:3.1.1.45] | (RefSeq) endo-1,3;1,4-beta-D-glucanase-like (A)	predicted protein [Hordeum vulgare subsp. vulgare]	--	SubName: Full=Uncharacterized protein {ECO:0000313|EnsemblPlants:HORVU1Hr1G062110.4};	Predicted hydrolase related to dienelactone hydrolase	--	--
TRINITY_DN104107_c0_g1_i1.path1	7.96	5.36	5.02	18.71	21.83	15.1	48	40	31	104	149	94	3.321	1.732	1.11916e-07	7.91115e-07	up	5C	535452852	535453232	-	TRINITY_DN104107_c0_g1_i1	--	--	--	--	--	--	--	--
TRINITY_DN10412_c1_g1_i2.path1	0	0.53	0.39	1.01	4.33	4.88	0	5	3	7	37	38	12.196	3.608	3.30728e-05	0.000161404	up	2A	436911146	436911622	+	TRINITY_DN10412_c1_g1_i2	--	--	--	--	--	--	--	--
TRINITY_DN104129_c0_g1_i1.path1	4.25	5.67	2.7	15.23	9.21	12.57	20	33	13	66	49	61	3.242	1.697	7.47366e-05	0.00034194	up	6D	205737752	205738048	-	TRINITY_DN104129_c0_g1_i1	--	--	--	--	--	--	--	--
TRINITY_DN104129_c0_g1_i1.path2	4.04	6.7	3.12	19.62	10.53	13.39	19	39	15	85	56	65	3.459	1.79	2.30874e-05	0.000115804	up	6A	238606819	238607115	-	TRINITY_DN104129_c0_g1_i1	--	--	--	--	--	--	--	--
TRINITY_DN104142_c0_g1_i1.path1	0	0	0	15.42	18.74	16.94	0	0	0	65	97	80	504.533	8.979	3.57976e-13	4.632e-12	up	4A	375653501	375653789	+	TRINITY_DN104142_c0_g1_i1	--	--	--	--	--	--	--	--
TRINITY_DN104142_c0_g1_i1.path2	0	0	0	1.44	1.76	4.71	0	0	0	6	9	22	80.258	6.327	2.10916e-05	0.000106412	up	3C	600694925	600695210	+	TRINITY_DN104142_c0_g1_i1	--	K00924 kinase [EC:2.7.1.-] | (RefSeq) receptor protein kinase CLAVATA1 (A)	Leucine-rich repeat receptor-like serine/threonine-protein kinase BAM1 [Dichanthelium oligosanthes]	RecName: Full=Leucine-rich repeat receptor-like serine/threonine-protein kinase BAM3; EC=2.7.11.1; AltName: Full=Protein BARELY ANY MERISTEM 3; Flags: Precursor;	SubName: Full=Uncharacterized protein {ECO:0000313|EnsemblPlants:HORVU1Hr1G095340.5};	--	GO:0016021,integral component of membrane; GO:0005886,plasma membrane; GO:0005524,ATP binding; GO:0004674,protein serine/threonine kinase activity; GO:0030154,cell differentiation; GO:0048437,floral organ development; GO:0010075,regulation of meristem growth	--
TRINITY_DN104142_c0_g1_i1.path3	0	0	0	3.08	0.77	5.72	0	0	0	13	4	27	98.444	6.621	8.29211e-06	4.46644e-05	up	3D	369769689	369769977	+	TRINITY_DN104142_c0_g1_i1	--	--	--	--	--	--	--	--
TRINITY_DN104144_c0_g1_i1.path1	45.95	41.13	39.29	4.33	14.56	4.6	184	204	161	16	66	19	0.202	-2.308	5.65895e-09	4.72552e-08	down	7C	378506930	378507182	+	TRINITY_DN104144_c0_g1_i1	--	--	--	--	--	--	--	--
TRINITY_DN104150_c0_g1_i1.path1	3.65	4.28	2.32	0	0	0	20	29	13	0	0	0	0.011	-6.557	1.84487e-06	1.09891e-05	down	2A	394482579	394482924	+	TRINITY_DN104150_c0_g1_i1	--	--	--	--	--	--	--	--
TRINITY_DN104152_c0_g1_i1.path1	9.67	9.27	5.32	0.66	2.94	1.17	32	38	18	2	11	4	0.219	-2.19	0.00108733	0.00391379	down	1C	106442551	106443593	-	TRINITY_DN104152_c0_g1_i1	--	--	--	--	--	--	--	--
TRINITY_DN104158_c0_g1_i1.path1	7	2.6	5.18	1.23	1	0.55	37	17	28	6	6	3	0.202	-2.304	0.000829814	0.0030725	down	4D	402067072	402067405	-	TRINITY_DN104158_c0_g1_i1	--	--	--	--	--	--	--	--
TRINITY_DN10416_c0_g3_i1.path1	1.99	1.47	1.43	0.76	0.41	0.11	34	31	25	12	8	2	0.28	-1.835	0.0037822	0.0117917	down	6A	85420543	85422004	-	TRINITY_DN10416_c0_g3_i1	--	--	--	--	--	--	--	--
TRINITY_DN104161_c0_g1_i1.path1	2.88	2.99	7.84	0	1.64	0	14	18	39	0	9	0	0.129	-2.955	0.00226389	0.00751683	down	3D	325580926	325581232	-	TRINITY_DN104161_c0_g1_i1	--	--	--	--	--	--	--	--
TRINITY_DN104163_c0_g1_i1.path1	7.36	8.42	7.19	0.33	0.54	0.59	24	34	24	1	2	2	0.071	-3.813	8.15987e-06	4.40132e-05	down	1C	100476186	100476391	+	TRINITY_DN104163_c0_g1_i1	--	K12598 ATP-dependent RNA helicase DOB1 [EC:3.6.4.13] | (RefSeq) DExH-box ATP-dependent RNA helicase DExH10-like (A)	P0650D04.15 [Oryza sativa Japonica Group]	--	SubName: Full=p0650D04.15 protein {ECO:0000313|EMBL:CAI44611.1};	FOG: Reverse transcriptase	GO:0003676,nucleic acid binding; GO:0003964,RNA-directed DNA polymerase activity; GO:0008270,zinc ion binding	--
TRINITY_DN10417_c0_g2_i1.path1	13.82	10.36	7.14	3.43	5.93	3.44	70	65	37	16	34	18	0.45	-1.153	0.00818549	0.0231581	down	2A	355361882	355362201	+	TRINITY_DN10417_c0_g2_i1	--	--	--	--	--	--	--	--
TRINITY_DN10419_c0_g1_i27.path1	3.73	3.63	3.48	9.68	6.82	7.83	176	212	168	421	364	381	2.47	1.304	4.10433e-08	3.07718e-07	up	1C	319691561	319694647	+	TRINITY_DN10419_c0_g1_i27	--	--	--	--	--	--	--	--
TRINITY_DN10419_c0_g1_i27.path2	1.94	1.67	1.44	6.9	4.05	4.61	91	97	69	298	215	223	3.384	1.759	1.07343e-09	9.75059e-09	up	3C	226887608	226890674	+	TRINITY_DN10419_c0_g1_i27	--	--	--	--	--	--	--	--
TRINITY_DN104192_c0_g1_i1.path1	0	0.33	0.2	2.21	0.9	7.11	0	2	1	10	5	36	21.784	4.445	0.00021237	0.000892139	up	3C	17361020	17361329	+	TRINITY_DN104192_c0_g1_i1	--	K19891 glucan endo-1,3-beta-glucosidase 1/2/3 [EC:3.2.1.39] | (RefSeq) glucan endo-1,3-beta-glucosidase 3-like (A)	beta 1,3 glucanase [Zea mays subsp. parviglumis]	RecName: Full=Glucan endo-1,3-beta-glucosidase, acidic isoform; EC=3.2.1.39; AltName: Full=(1->3)-beta-glucan endohydrolase; Short=(1->3)-beta-glucanase; AltName: Full=Beta-1,3-endoglucanase; Flags: Precursor;	SubName: Full=Beta 1,3 glucanase {ECO:0000313|EMBL:ACJ62655.1};	--	GO:0005615,extracellular space; GO:0042973,glucan endo-1,3-beta-D-glucosidase activity; GO:0005975,carbohydrate metabolic process; GO:0006952,defense response	--
TRINITY_DN104199_c0_g1_i1.path1	0	0	0	6.29	11.66	7.17	0	0	0	29	66	37	269.276	8.073	2.6601e-10	2.57507e-09	up	3C	513594934	513595249	+	TRINITY_DN104199_c0_g1_i1	--	--	uncharacterized protein LOC110431725 [Sorghum bicolor]	--	SubName: Full=Uncharacterized protein {ECO:0000313|EMBL:KQK11889.1}; Flags: Fragment;	--	--	--
TRINITY_DN104208_c0_g1_i1.path1	0.23	0	0	5.23	4.47	3.78	1	0	0	21	22	17	64.551	6.012	7.37501e-06	4.00699e-05	up	7C	465397270	465397544	-	TRINITY_DN104208_c0_g1_i1	--	--	--	--	--	--	--	--
TRINITY_DN104209_c0_g1_i1.path1	0	0	0	0.63	3.3	1.69	0	0	0	7	45	21	145.273	7.183	2.36064e-07	1.59949e-06	up	2D	514187083	514187843	+	TRINITY_DN104209_c0_g1_i1	--	--	--	--	--	--	--	--
TRINITY_DN104214_c0_g1_i1.path1	0	0	0	0.97	0.79	4.93	0	0	0	3	3	17	51.237	5.679	0.000661764	0.00250281	up	2A	105991309	105991519	-	TRINITY_DN104214_c0_g1_i1	--	--	--	--	--	--	--	--
TRINITY_DN104226_c0_g1_i1.path1	39.19	24.38	32.44	8.36	8.14	8.71	183	141	155	36	43	42	0.288	-1.796	4.12912e-08	3.09377e-07	down	4A	294760728	294761022	-	TRINITY_DN104226_c0_g1_i1	--	--	--	--	--	--	--	--
TRINITY_DN104243_c0_g1_i1.path1	2.04	2.01	2.86	11.84	11.84	12.64	23	28	33	123	151	147	5.799	2.536	1.89775e-14	2.76916e-13	up	1A	459431787	459432498	+	TRINITY_DN104243_c0_g1_i1	--	--	--	--	--	--	--	--
TRINITY_DN104245_c0_g1_i1.path1	2.39	6.43	3.89	1.44	0.94	0.26	9	30	15	5	4	1	0.223	-2.168	0.00963648	0.02669	down	1A	277727335	277727572	+	TRINITY_DN104245_c0_g1_i1	--	--	--	--	--	--	--	--
TRINITY_DN10425_c0_g1_i1.path2	0.25	0.38	0.43	1.13	1.96	2.65	9	17	16	38	81	100	6.12	2.613	4.79975e-08	3.56242e-07	up	1D	337543642	337545950	+	TRINITY_DN10425_c0_g1_i1	--	--	--	--	--	--	--	Leukemia-associated protein 7
TRINITY_DN10425_c0_g1_i1.path3	0.11	0	0	0.15	0.32	0.53	4	0	0	5	13	20	10.724	3.423	0.00330615	0.0104841	up	7C	688208565	688210853	+	TRINITY_DN10425_c0_g1_i1	--	--	--	--	--	--	--	Leukemia-associated protein 7
TRINITY_DN10425_c1_g1_i2.path1	1.15	0.31	0.07	15.66	17.01	25.31	15	5	1	189	252	342	42.957	5.425	1.10553e-09	1.00256e-08	up	2C	510752554	510753724	-	TRINITY_DN10425_c1_g1_i2	--	K23490 cytochrome b5 | (RefSeq) metal-nicotianamine transporter YSL3-like (A)	putative metal-nicotianamine transporter YSL9 [Triticum urartu]	RecName: Full=Probable metal-nicotianamine transporter YSL9; AltName: Full=Protein YELLOW STRIPE LIKE 9; Short=OsYSL9;	SubName: Full=Putative iron(III)-phytosiderophore uptake mediator (Yellow stripe like transporter) {ECO:0000313|EMBL:CCJ47186.1}; Flags: Fragment;	--	GO:0016021,integral component of membrane; GO:0005886,plasma membrane; GO:0051980,iron-nicotianamine transmembrane transporter activity; GO:0010039,response to iron ion; GO:0048316,seed development	OPT oligopeptide transporter protein
TRINITY_DN10425_c1_g1_i2.path2	0.15	0.43	0.67	2.4	3.92	3.77	2	7	9	29	58	51	8.85	3.146	6.56315e-08	4.77688e-07	up	2D	377918335	377919507	+	TRINITY_DN10425_c1_g1_i2	--	K23490 cytochrome b5 | (RefSeq) metal-nicotianamine transporter YSL3-like (A)	PREDICTED: probable metal-nicotianamine transporter YSL9 isoform X2 [Brachypodium distachyon]	RecName: Full=Probable metal-nicotianamine transporter YSL9; AltName: Full=Protein YELLOW STRIPE LIKE 9; Short=OsYSL9;	SubName: Full=Putative iron(III)-phytosiderophore uptake mediator (Yellow stripe like transporter) {ECO:0000313|EMBL:CCJ47186.1}; Flags: Fragment;	--	GO:0016021,integral component of membrane; GO:0005886,plasma membrane; GO:0051980,iron-nicotianamine transmembrane transporter activity; GO:0010039,response to iron ion; GO:0048316,seed development	OPT oligopeptide transporter protein
TRINITY_DN10425_c1_g1_i2.path3	0.53	0.19	0.15	11.77	11.75	19.09	7	3	2	142	174	258	56.395	5.817	1.06015e-26	3.64709e-25	up	2A	360948746	360949918	-	TRINITY_DN10425_c1_g1_i2	--	K23490 cytochrome b5 | (RefSeq) metal-nicotianamine transporter YSL3-like (A)	putative metal-nicotianamine transporter YSL9 [Triticum urartu]	RecName: Full=Probable metal-nicotianamine transporter YSL9; AltName: Full=Protein YELLOW STRIPE LIKE 9; Short=OsYSL9;	SubName: Full=Putative iron(III)-phytosiderophore uptake mediator (Yellow stripe like transporter) {ECO:0000313|EMBL:CCJ47186.1}; Flags: Fragment;	--	GO:0016021,integral component of membrane; GO:0005886,plasma membrane; GO:0051980,iron-nicotianamine transmembrane transporter activity; GO:0010039,response to iron ion; GO:0048316,seed development	OPT oligopeptide transporter protein
TRINITY_DN104252_c0_g1_i1.path1	2.38	1.71	1.03	3.44	5.37	7.68	9	8	4	12	23	30	3.637	1.863	0.00507162	0.0152378	up	6A	301650208	301650446	+	TRINITY_DN104252_c0_g1_i1	--	--	--	--	--	--	--	--
TRINITY_DN104256_c0_g1_i1.path1	6.38	6.58	9.47	2.87	2.33	1.71	29	37	44	12	12	8	0.333	-1.587	0.00243429	0.00801773	down	5C	556326442	556326728	-	TRINITY_DN104256_c0_g1_i1	--	--	--	--	--	--	--	--
TRINITY_DN104258_c0_g1_i1.path1	3.84	3.88	4.32	0.42	0.68	0	20	25	23	2	4	0	0.099	-3.335	0.000121888	0.000535241	down	4D	386214341	386214669	+	TRINITY_DN104258_c0_g1_i1	--	--	--	--	--	--	--	--
TRINITY_DN104264_c0_g1_i1.path1	3.03	2.24	1.23	4.66	11.17	6.61	12	11	5	17	50	27	3.799	1.925	0.00102974	0.00372985	up	6A	422942374	422946573	-	TRINITY_DN104264_c0_g1_i1	--	K00103 L-gulonolactone oxidase [EC:1.1.3.8] | (RefSeq) L-gulonolactone oxidase 3 (A)	PREDICTED: L-gulonolactone oxidase 3 [Brachypodium distachyon]	RecName: Full=L-gulonolactone oxidase 3 {ECO:0000303|PubMed:20622436}; Short=AtGulLO3 {ECO:0000303|PubMed:20622436}; EC=1.1.3.8 {ECO:0000269|PubMed:20622436}; Flags: Precursor;	SubName: Full=Uncharacterized protein {ECO:0000313|EMBL:EMT30185.1, ECO:0000313|EnsemblPlants:EMT30185};	D-arabinono-1, 4-lactone oxidase	GO:0016020,membrane; GO:0005773,vacuole; GO:0003885,D-arabinono-1,4-lactone oxidase activity; GO:0050660,flavin adenine dinucleotide binding; GO:0050105,L-gulonolactone oxidase activity; GO:0019853,L-ascorbic acid biosynthetic process	--
TRINITY_DN10427_c0_g1_i5.path1	5.68	4.82	4.6	1.75	1.64	1.49	303	318	251	86	99	82	0.354	-1.497	1.17304e-09	1.06081e-08	down	2C	390198602	390207031	-	TRINITY_DN10427_c0_g1_i5	--	K05539 tRNA-dihydrouridine synthase A [EC:1.-.-.-] | (RefSeq) uncharacterized protein LOC109743975 (A)	uncharacterized protein LOC109743975 [Aegilops tauschii subsp. tauschii]	--	SubName: Full=Uncharacterized protein {ECO:0000313|EnsemblPlants:HORVU2Hr1G065180.7};	tRNA-dihydrouridine synthase	GO:0050660,flavin adenine dinucleotide binding; GO:0017150,tRNA dihydrouridine synthase activity	Dihydrouridine synthase (Dus)
TRINITY_DN10427_c0_g2_i1.path2	5.67	8.37	7.42	2.35	1.6	3.04	47	86	63	18	15	26	0.362	-1.467	0.000672817	0.00254152	down	2D	50485978	50486501	+	TRINITY_DN10427_c0_g2_i1	--	K05539 tRNA-dihydrouridine synthase A [EC:1.-.-.-] | (RefSeq) tRNA-dihydrouridine(20/20a) synthase-like (A)	hypothetical protein PAHAL_C03680 [Panicum hallii]	--	RecName: Full=tRNA-dihydrouridine synthase {ECO:0000256|PIRNR:PIRNR006621}; EC=1.3.1.- {ECO:0000256|PIRNR:PIRNR006621};	tRNA-dihydrouridine synthase	GO:0050660,flavin adenine dinucleotide binding; GO:0017150,tRNA dihydrouridine synthase activity	--
TRINITY_DN10427_c0_g2_i1.path3	5.76	6.21	5.28	1.3	2.44	1.51	48	64	45	10	23	13	0.336	-1.574	0.00042974	0.00169352	down	2A	267917245	267917770	-	TRINITY_DN10427_c0_g2_i1	--	K05539 tRNA-dihydrouridine synthase A [EC:1.-.-.-] | (RefSeq) tRNA-dihydrouridine(20/20a) synthase-like (A)	hypothetical protein PAHAL_C03680 [Panicum hallii]	--	RecName: Full=tRNA-dihydrouridine synthase {ECO:0000256|PIRNR:PIRNR006621}; EC=1.3.1.- {ECO:0000256|PIRNR:PIRNR006621};	tRNA-dihydrouridine synthase	GO:0050660,flavin adenine dinucleotide binding; GO:0017150,tRNA dihydrouridine synthase activity	--
TRINITY_DN10427_c0_g3_i1.path1	13.3	13.61	12.66	3.23	4.15	2	116	147	113	26	41	18	0.258	-1.954	7.74257e-09	6.34987e-08	down	2A	267913561	267914598	-	TRINITY_DN10427_c0_g3_i1	--	K05539 tRNA-dihydrouridine synthase A [EC:1.-.-.-] | (RefSeq) uncharacterized protein LOC109743975 (A)	uncharacterized protein LOC109743975 [Aegilops tauschii subsp. tauschii]	--	SubName: Full=Uncharacterized protein {ECO:0000313|EnsemblPlants:HORVU2Hr1G065180.16};	tRNA-dihydrouridine synthase	GO:0017150,tRNA dihydrouridine synthase activity	--
TRINITY_DN104271_c0_g1_i1.path2	7.48	4.25	0.54	0.3	0.24	0	27	19	2	1	1	0	0.048	-4.375	0.00147853	0.00515513	down	6A	25686044	25686271	+	TRINITY_DN104271_c0_g1_i1	--	--	--	--	--	--	--	--
TRINITY_DN104284_c0_g1_i1.path2	3.35	2.5	3.02	17.35	17.32	14.99	13	12	12	62	76	60	6.163	2.624	5.90741e-10	5.51119e-09	up	1D	283155515	283155759	+	TRINITY_DN104284_c0_g1_i1	--	--	--	--	--	--	--	--
TRINITY_DN104284_c0_g1_i1.path3	14.32	11.36	12.25	50.51	44.98	45.84	56	55	49	182	199	185	4.104	2.037	2.70461e-13	3.54243e-12	up	1C	12817708	12817954	-	TRINITY_DN104284_c0_g1_i1	--	--	--	--	--	--	--	--
TRINITY_DN104285_c0_g1_i1.path2	0	0.22	0	2.67	1.45	2.12	0	1	0	9	6	8	25.293	4.661	0.00249402	0.00819041	up	6A	250064235	250064465	-	TRINITY_DN104285_c0_g1_i1	--	--	--	--	--	--	--	--
TRINITY_DN10429_c0_g1_i2.path1	0.83	1.02	0.69	0.27	0.29	0.07	46	70	39	14	18	4	0.268	-1.898	0.000178589	0.000760953	down	6A	321066664	321072635	+	TRINITY_DN10429_c0_g1_i2	--	K02350 DNA polymerase zeta [EC:2.7.7.7] | (RefSeq) DNA polymerase zeta catalytic subunit (A)	uncharacterized protein LOC109755650 [Aegilops tauschii subsp. tauschii]	RecName: Full=Zinc finger protein VAR3, chloroplastic {ECO:0000305}; AltName: Full=Organelle Zinc finger 1 {ECO:0000303|PubMed:25768119}; AltName: Full=Protein VARIEGATED 3 {ECO:0000303|PubMed:15340011}; Flags: Precursor;	SubName: Full=Uncharacterized protein {ECO:0000313|EnsemblPlants:TRIAE_CS42_6BL_TGACv1_499742_AA1590740.4};	RNA-binding Ran Zn-finger protein and related proteins	GO:0009507,chloroplast; GO:0009570,chloroplast stroma; GO:0046872,metal ion binding; GO:1900871,chloroplast mRNA modification; GO:0009658,chloroplast organization; GO:0006397,mRNA processing	Zn-finger in Ran binding protein and others
TRINITY_DN10429_c0_g1_i2.path2	1.63	1.78	1.06	0.49	0.78	0.07	90	122	60	25	49	4	0.321	-1.64	0.00162048	0.00559082	down	6D	283093842	283099814	+	TRINITY_DN10429_c0_g1_i2	--	K02350 DNA polymerase zeta [EC:2.7.7.7] | (RefSeq) LOW QUALITY PROTEIN: DNA polymerase zeta catalytic subunit (A)	uncharacterized protein LOC109755650 [Aegilops tauschii subsp. tauschii]	RecName: Full=Zinc finger protein VAR3, chloroplastic {ECO:0000305}; AltName: Full=Organelle Zinc finger 1 {ECO:0000303|PubMed:25768119}; AltName: Full=Protein VARIEGATED 3 {ECO:0000303|PubMed:15340011}; Flags: Precursor;	SubName: Full=Uncharacterized protein {ECO:0000313|EnsemblPlants:TRIAE_CS42_6BL_TGACv1_499742_AA1590740.4};	RNA-binding Ran Zn-finger protein and related proteins	GO:0009507,chloroplast; GO:0009570,chloroplast stroma; GO:0046872,metal ion binding; GO:1900871,chloroplast mRNA modification; GO:0009658,chloroplast organization; GO:0006397,mRNA processing	Zn-finger in Ran binding protein and others
TRINITY_DN104293_c0_g1_i1.path1	0.28	0.67	0	1.8	0.73	2.15	2	6	0	12	6	16	5.502	2.46	0.0145216	0.0379418	up	4D	278435012	278435467	-	TRINITY_DN104293_c0_g1_i1	--	K00809 deoxyhypusine synthase [EC:2.5.1.46] | (RefSeq) dhs2; deoxyhypusine synthase 2 (A)	putative Deoxyhypusine synthase [Oryza sativa Japonica Group]	RecName: Full=Deoxyhypusine synthase; EC=2.5.1.46;	SubName: Full=Putative Deoxyhypusine synthase {ECO:0000313|EMBL:BAD33630.1};	Deoxyhypusine synthase	GO:0034038,deoxyhypusine synthase activity; GO:0008612,peptidyl-lysine modification to peptidyl-hypusine	--
TRINITY_DN1043_c0_g1_i6.path1	17.01	18.17	16	43.79	45.13	49.18	610	807	587	1447	1831	1820	2.987	1.579	1.66087e-15	2.65252e-14	up	6C	352842943	352847659	+	TRINITY_DN1043_c0_g1_i6	--	K14502 protein brassinosteroid insensitive 2 [EC:2.7.11.1] | (RefSeq) shaggy-related protein kinase eta (A)	PREDICTED: shaggy-related protein kinase eta [Oryza brachyantha]	RecName: Full=Shaggy-related protein kinase GSK4 {ECO:0000305}; EC=2.7.11.1 {ECO:0000305}; AltName: Full=Glycogen synthase kinase3-like protein 4 {ECO:0000305}; Short=OsGSK4 {ECO:0000305}; AltName: Full=Shaggy-related protein kinase etha homolog {ECO:0000305}; Short=OsKETHA {ECO:0000303|PubMed:22570626}; Short=SKETHA {ECO:0000303|PubMed:22570626};	SubName: Full=Uncharacterized protein {ECO:0000313|EnsemblPlants:OPUNC02G09020.1};	Glycogen synthase kinase-3	GO:0005524,ATP binding; GO:0004674,protein serine/threonine kinase activity; GO:0009742,brassinosteroid mediated signaling pathway	Protein kinase domain
TRINITY_DN104309_c0_g1_i1.path1	4.98	5.24	3.7	1.29	1.82	0.84	46	60	35	11	19	8	0.31	-1.689	0.000421844	0.00166579	down	2D	517917511	517918094	+	TRINITY_DN104309_c0_g1_i1	--	--	--	--	--	--	--	--
TRINITY_DN10432_c1_g1_i1.path1	0.7	0.76	0.23	3.17	3.83	3.51	6	8	2	25	37	31	6.863	2.779	6.9371e-06	3.78518e-05	up	1C	103909093	103909632	+	TRINITY_DN10432_c1_g1_i1	--	--	--	--	--	--	--	--
TRINITY_DN10432_c1_g4_i1.path1	1.17	1.06	1	3.26	3.17	1.99	16	18	14	41	49	28	2.828	1.5	0.00106332	0.00383657	up	1C	103908250	103909112	-	TRINITY_DN10432_c1_g4_i1	--	--	--	--	--	--	--	--
TRINITY_DN104333_c0_g1_i1.path2	0.57	0.34	0.41	1.69	1.5	3.15	4	3	3	11	12	23	5.436	2.443	0.00281609	0.00911597	up	2A	244103677	244104123	+	TRINITY_DN104333_c0_g1_i1	--	K02641 ferredoxin--NADP+ reductase [EC:1.18.1.2] | (RefSeq) ferredoxin--NADP reductase, root isozyme, chloroplastic (A)	--	RecName: Full=Ferredoxin--NADP reductase, root isozyme 2, chloroplastic; EC=1.18.1.2; AltName: Full=Root FNR 2; Short=AtRFNR2; Flags: Precursor;	--	NADP/FAD dependent oxidoreductase	GO:0009507,chloroplast; GO:0005507,copper ion binding; GO:0004324,ferredoxin-NADP+ reductase activity; GO:0015979,photosynthesis	--
TRINITY_DN104346_c0_g1_i1.path1	0.78	0.84	1.01	2.53	3.2	3.51	3	4	4	9	14	14	3.905	1.965	0.0160169	0.0413177	up	6A	242074025	242074268	+	TRINITY_DN104346_c0_g1_i1	--	--	--	--	--	--	--	--
TRINITY_DN104359_c0_g1_i1.path2	0.35	0.14	0	6.27	2.94	3.56	2	1	0	33	19	21	28.948	4.855	2.61772e-06	1.52264e-05	up	7D	359309024	359309567	-	TRINITY_DN104359_c0_g1_i1	--	--	--	--	--	--	--	--
TRINITY_DN104369_c0_g1_i1.path1	0	0	0	5.67	2.81	3.52	0	0	0	23	14	16	113.362	6.825	7.32176e-07	4.62671e-06	up	1C	108975115	108975392	-	TRINITY_DN104369_c0_g1_i1	--	--	--	--	--	--	--	--
TRINITY_DN10437_c0_g1_i2.path1	2.12	6.89	5.81	8.69	18.42	25.95	36	145	101	136	354	455	4.049	2.017	3.42589e-06	1.95848e-05	up	1D	40384559	40385631	-	TRINITY_DN10437_c0_g1_i2	--	K13993 HSP20 family protein | (RefSeq) LOC109786126; small heat shock protein, chloroplastic-like (A)	heat shock protein 20, partial [Triticum aestivum]	RecName: Full=Small heat shock protein, chloroplastic; Flags: Precursor;	SubName: Full=Heat shock protein 20 {ECO:0000313|EMBL:CAJ19349.1}; Flags: Fragment;	--	GO:0009507,chloroplast	--
TRINITY_DN104377_c0_g1_i1.path1	0	0	0	4.35	2.53	4.07	0	0	0	21	15	22	124.499	6.96	3.21121e-07	2.13648e-06	up	5C	546701582	546701912	+	TRINITY_DN104377_c0_g1_i1	--	--	--	--	--	--	--	--
TRINITY_DN104379_c0_g1_i1.path1	0.84	0.34	0.62	2.73	2.97	2.03	4	2	3	12	16	10	4.755	2.25	0.00819427	0.0231802	up	7A	417921359	417921659	+	TRINITY_DN104379_c0_g1_i1	--	--	--	--	--	--	--	--
TRINITY_DN104382_c0_g1_i1.path1	1.41	0.49	1.97	0	0	0	7	3	10	0	0	0	0.03	-5.044	0.00295232	0.00950148	down	3A	89526366	89526679	-	TRINITY_DN104382_c0_g1_i1	--	--	--	--	--	--	--	--
TRINITY_DN10439_c0_g1_i5.path1	5.31	7.37	6.74	24.44	16.27	23.13	248	426	322	1051	859	1114	3.646	1.866	1.13686e-13	1.54623e-12	up	2D	285597602	285602633	+	TRINITY_DN10439_c0_g1_i5	--	K10352 myosin heavy chain | (RefSeq) filament-like plant protein 3 (A)	filament-like plant protein 3 isoform X1 [Aegilops tauschii subsp. tauschii]	RecName: Full=Filament-like plant protein 3; Short=AtFPP3;	SubName: Full=Uncharacterized protein {ECO:0000313|EnsemblPlants:TRIAE_CS42_2DS_TGACv1_178469_AA0596030.1};	--	GO:0031410,cytoplasmic vesicle; GO:0030674,protein binding, bridging; GO:0060178,regulation of exocyst localization	Filament-like plant protein, long coiled-coil
TRINITY_DN10439_c0_g1_i5.path2	3.85	4.71	5.09	19.53	16.04	23.44	179	271	242	837	844	1125	4.81	2.266	1.45517e-18	2.94592e-17	up	2A	25325599	25330787	-	TRINITY_DN10439_c0_g1_i5	--	K10352 myosin heavy chain | (RefSeq) filament-like plant protein 3 (A)	filament-like plant protein 3 isoform X1 [Aegilops tauschii subsp. tauschii]	RecName: Full=Filament-like plant protein 3; Short=AtFPP3;	SubName: Full=Uncharacterized protein {ECO:0000313|EnsemblPlants:TRIAE_CS42_2DS_TGACv1_178469_AA0596030.1};	--	GO:0031410,cytoplasmic vesicle; GO:0030674,protein binding, bridging; GO:0060178,regulation of exocyst localization	Filament-like plant protein, long coiled-coil
TRINITY_DN1044_c0_g1_i3.path1	13.12	14.01	15.2	49.51	66.15	67.85	264	349	313	918	1506	1409	4.79	2.26	3.00078e-22	7.81017e-21	up	2D	408706144	408708865	-	TRINITY_DN1044_c0_g1_i3	--	K02183 calmodulin | (RefSeq) family of serine hydrolases 3-like (A)	esterase AGAP003155 [Aegilops tauschii subsp. tauschii]	RecName: Full=Rhodanese-like domain-containing protein 6; AltName: Full=Sulfurtransferase 6; Short=AtStr6;	SubName: Full=Uncharacterized protein {ECO:0000313|EnsemblPlants:TRIAE_CS42_2BL_TGACv1_131618_AA0429920.1};	Phospholipase/carboxyhydrolase	--	Serine hydrolase (FSH1)
TRINITY_DN10440_c0_g2_i1.path1	2.88	2.22	2.41	0.31	0.37	0.27	41	39	35	4	6	4	0.139	-2.847	2.67134e-06	1.55151e-05	down	5D	263006262	263020281	-	TRINITY_DN10440_c0_g2_i1	--	--	--	--	--	--	--	--
TRINITY_DN104407_c0_g1_i1.path1	5.62	5.22	8.82	2.03	2.11	1.48	33	38	53	11	14	9	0.31	-1.69	0.000973186	0.00354445	down	1A	490779526	490779896	+	TRINITY_DN104407_c0_g1_i1	--	K05391 cyclic nucleotide gated channel, plant | (RefSeq) LOC109763486; cyclic nucleotide-gated ion channel 4-like (A)	cyclic nucleotide-gated ion channel 4, partial [Hordeum vulgare subsp. vulgare]	RecName: Full=Cyclic nucleotide-gated ion channel 4; Short=AtCNGC4; AltName: Full=Cyclic nucleotide- and calmodulin-regulated ion channel 4; Short=AtHLM1;	SubName: Full=Uncharacterized protein {ECO:0000313|EnsemblPlants:HORVU1Hr1G066020.1};	K+-channel ERG and related proteins, contain PAS/PAC sensor domain	GO:0005887,integral component of plasma membrane; GO:0016020,membrane; GO:0005516,calmodulin binding; GO:0030552,cAMP binding; GO:0008324,cation transmembrane transporter activity; GO:0030553,cGMP binding; GO:0005249,voltage-gated potassium channel activity; GO:0009626,plant-type hypersensitive response; GO:0042391,regulation of membrane potential	--
TRINITY_DN10441_c0_g1_i1.path1	1.42	1.28	1.3	0.09	0.07	0.24	17	19	16	1	1	3	0.113	-3.146	0.000786719	0.00292561	down	5C	372019500	372020257	+	TRINITY_DN10441_c0_g1_i1	--	--	--	--	--	--	--	--
TRINITY_DN104445_c0_g1_i1.path1	3.78	1.99	2.96	0.41	0.5	0.18	20	13	16	2	3	1	0.136	-2.875	0.00165426	0.00569533	down	7C	647534882	647535215	-	TRINITY_DN104445_c0_g1_i1	--	--	--	--	--	--	--	--
TRINITY_DN10445_c0_g1_i17.path1	10.46	10.48	8.83	1.51	3.39	1.09	278	345	240	37	102	30	0.218	-2.197	1.03002e-10	1.04216e-09	down	2C	226914241	226916098	+	TRINITY_DN10445_c0_g1_i17	--	--	--	--	--	--	--	--
TRINITY_DN10446_c0_g1_i6.path1	0.18	0.58	0.32	2.43	1.1	5.51	7	28	13	88	49	223	9.687	3.276	6.60218e-09	5.46465e-08	up	1A	260494593	260498027	+	TRINITY_DN10446_c0_g1_i6	--	K00750 glycogenin [EC:2.4.1.186] | (RefSeq) putative glucuronosyltransferase PGSIP8 (A)	predicted protein, partial [Hordeum vulgare subsp. vulgare]	RecName: Full=Putative glucuronosyltransferase PGSIP8; EC=2.4.1.-; AltName: Full=Glycogenin-like protein 8; AltName: Full=Plant glycogenin-like starch initiation protein 8;	SubName: Full=Predicted protein {ECO:0000313|EMBL:BAJ85686.1}; Flags: Fragment;	Glycosyl transferase, family 8 - glycogenin	GO:0016021,integral component of membrane; GO:0046872,metal ion binding; GO:0016757,transferase activity, transferring glycosyl groups; GO:0006486,protein glycosylation	--
TRINITY_DN10446_c1_g1_i3.path1	1.35	2.18	1.65	15.86	17.78	17.1	12	24	15	130	179	157	10.759	3.427	5.57601e-23	1.52591e-21	up	2D	374917837	374918398	+	TRINITY_DN10446_c1_g1_i3	--	--	--	--	--	--	--	--
TRINITY_DN104471_c0_g1_i1.path1	0.43	0.17	0.21	1.4	1.9	1.46	2	1	1	6	10	7	6.521	2.705	0.0190345	0.0477478	up	2A	387101109	387101801	-	TRINITY_DN104471_c0_g1_i1	--	K04733 interleukin-1 receptor-associated kinase 4 [EC:2.7.11.1] | (RefSeq) probable LRR receptor-like serine/threonine-protein kinase At1g56130 (A)	hypothetical protein BRADI_5g21870v3 [Brachypodium distachyon]	RecName: Full=Probable LRR receptor-like serine/threonine-protein kinase At1g56140; EC=2.7.11.1; Flags: Precursor;	SubName: Full=Uncharacterized protein {ECO:0000313|EnsemblPlants:HORVU7Hr1G006940.13};	--	GO:0016021,integral component of membrane; GO:0005886,plasma membrane; GO:0005524,ATP binding; GO:0004674,protein serine/threonine kinase activity	Leucine rich repeat
TRINITY_DN104471_c0_g1_i1.path3	1.07	2.43	0.42	6.29	3.61	5.62	5	14	2	27	19	27	4.368	2.127	0.00156036	0.00540702	up	2C	537018770	537019475	-	TRINITY_DN104471_c0_g1_i1	--	K04733 interleukin-1 receptor-associated kinase 4 [EC:2.7.11.1] | (RefSeq) probable LRR receptor-like serine/threonine-protein kinase At1g56130 (A)	PREDICTED: probable LRR receptor-like serine/threonine-protein kinase At1g56130 [Brachypodium distachyon]	RecName: Full=Probable LRR receptor-like serine/threonine-protein kinase At1g56140; EC=2.7.11.1; Flags: Precursor;	SubName: Full=Uncharacterized protein {ECO:0000313|EnsemblPlants:HORVU7Hr1G006940.13};	--	GO:0016021,integral component of membrane; GO:0005886,plasma membrane; GO:0005524,ATP binding; GO:0004674,protein serine/threonine kinase activity	Leucine rich repeat
TRINITY_DN104484_c0_g1_i1.path1	1.1	0.67	0.4	5.08	3.77	2.53	8	6	3	34	31	19	5.726	2.518	6.85761e-05	0.00031613	up	5C	510621430	510621888	-	TRINITY_DN104484_c0_g1_i1	--	--	--	--	--	--	--	--
TRINITY_DN104489_c0_g1_i1.path1	4.97	2.45	1.35	0	0	0.27	18	11	5	0	0	1	0.036	-4.777	0.00149765	0.00521378	down	4C	543615754	543615982	+	TRINITY_DN104489_c0_g1_i1	--	--	--	--	--	--	--	--
TRINITY_DN10449_c0_g1_i12.path1	18.91	17.8	21.12	3.14	3.48	3.43	470	548	537	72	98	88	0.191	-2.389	6.03354e-23	1.64724e-21	down	3C	295792391	295819393	+	TRINITY_DN10449_c0_g1_i12	--	--	unnamed protein product [Triticum aestivum]	RecName: Full=Protein LOW PSII ACCUMULATION 1, chloroplastic; Flags: Precursor;	SubName: Full=Uncharacterized protein {ECO:0000313|EMBL:CDM81838.1, ECO:0000313|EnsemblPlants:TRIAE_CS42_3B_TGACv1_226150_AA0814280.1};	--	GO:0009507,chloroplast; GO:0009535,chloroplast thylakoid membrane; GO:0016021,integral component of membrane	Protein of unknown function (DUF3493)
TRINITY_DN104490_c0_g1_i1.path1	54.23	35.21	68.66	21.23	18.61	19.32	291	234	377	105	113	107	0.407	-1.298	2.57726e-05	0.000128264	down	7C	640802927	640803265	-	TRINITY_DN104490_c0_g1_i1	--	--	--	--	--	--	--	--
TRINITY_DN104492_c0_g1_i1.path1	0.47	0.57	1.62	15.15	16.31	14.9	2	3	7	59	78	65	19.324	4.272	6.55162e-14	9.10626e-13	up	2C	515754911	515755177	-	TRINITY_DN104492_c0_g1_i1	--	K00432 glutathione peroxidase [EC:1.11.1.9] | (RefSeq) probable phospholipid hydroperoxide glutathione peroxidase (A)	putative glutathione peroxidase [Zea mays]	RecName: Full=Probable phospholipid hydroperoxide glutathione peroxidase; Short=PHGPx; EC=1.11.1.12; AltName: Full=Salt-associated protein;	SubName: Full=Glutathione peroxidase {ECO:0000313|EnsemblPlants:HORVU6Hr1G063830.1};	--	GO:0005737,cytoplasm; GO:0004602,glutathione peroxidase activity; GO:0047066,phospholipid-hydroperoxide glutathione peroxidase activity; GO:0006979,response to oxidative stress	--
TRINITY_DN1045_c0_g2_i1.path2	5.55	5.88	5.79	11	11.45	10.51	179	235	191	327	418	350	2.103	1.073	4.66092e-07	3.03e-06	up	6C	493306742	493312523	+	TRINITY_DN1045_c0_g2_i1	--	K00908 calcium/calmodulin-dependent protein kinase kinase 1 [EC:2.7.11.17] | (RefSeq) serine/threonine-protein kinase GRIK1 (A)	PREDICTED: serine/threonine-protein kinase GRIK1-like [Brachypodium distachyon]	RecName: Full=Serine/threonine-protein kinase GRIK1; EC=2.7.11.1; AltName: Full=Protein GEMINIVIRUS REP INTERACTING KINASE 1; Short=Protein GRIK1; AltName: Full=SnRK1-activating protein kinase 2; Short=AtSnAK2;	SubName: Full=Uncharacterized protein {ECO:0000313|EMBL:KQK13614.1, ECO:0000313|EnsemblPlants:BRADI1G11340.1};	Ca2+/calmodulin-dependent protein kinase kinase beta and related serine/threonine protein kinases	GO:0005737,cytoplasm; GO:0005622,intracellular; GO:0005634,nucleus; GO:0005524,ATP binding; GO:0016301,kinase activity; GO:0004674,protein serine/threonine kinase activity; GO:0035556,intracellular signal transduction; GO:0018105,peptidyl-serine phosphorylation; GO:0018107,peptidyl-threonine phosphorylation; GO:0046777,protein autophosphorylation; GO:0006468,protein phosphorylation; GO:0009615,re…	Protein kinase domain
TRINITY_DN104504_c0_g1_i1.path1	1.75	1.77	1	2.54	4.91	4.82	12	15	7	16	38	34	3.022	1.596	0.00431889	0.0132441	up	4A	458013442	458013873	+	TRINITY_DN104504_c0_g1_i1	--	--	--	--	--	--	--	--
TRINITY_DN10451_c0_g1_i2.path1	0.2	1.59	0.39	30.26	16.63	36.86	2	20	4	283	191	386	43.782	5.452	6.45587e-11	6.68449e-10	up	6A	275892212	275892852	-	TRINITY_DN10451_c0_g1_i2	--	--	hypothetical protein TRIUR3_13998 [Triticum urartu]	--	SubName: Full=Uncharacterized protein {ECO:0000313|EnsemblPlants:TRIAE_CS42_5BS_TGACv1_423248_AA1372220.1};	--	--	--
TRINITY_DN10451_c0_g1_i2.path2	1.79	3.85	1.07	42.25	26.77	52.06	18	48	11	392	305	541	20.333	4.346	6.61694e-28	2.42886e-26	up	6D	238468957	238469592	-	TRINITY_DN10451_c0_g1_i2	--	--	hypothetical protein TRIUR3_13998 [Triticum urartu]	--	SubName: Full=Uncharacterized protein {ECO:0000313|EnsemblPlants:TRIAE_CS42_5BS_TGACv1_423248_AA1372220.1};	--	--	--
TRINITY_DN104530_c0_g1_i1.path1	6.73	3.07	4.57	0	0.52	0	23	13	16	0	2	0	0.042	-4.58	0.000349682	0.00140575	down	6C	535350430	535350645	-	TRINITY_DN104530_c0_g1_i1	--	--	--	--	--	--	--	--
TRINITY_DN104530_c0_g1_i1.path2	10.87	6.41	5.17	0.32	0	0	37	27	18	1	0	0	0.015	-6.048	5.73484e-06	3.17174e-05	down	6A	318836281	318836495	+	TRINITY_DN104530_c0_g1_i1	--	--	--	--	--	--	--	--
TRINITY_DN104530_c0_g1_i1.path3	10.87	9.25	6.6	0	0.26	0	37	39	23	0	1	0	0.013	-6.297	1.36716e-06	8.3051e-06	down	6D	281102428	281102642	+	TRINITY_DN104530_c0_g1_i1	--	--	--	--	--	--	--	--
TRINITY_DN104532_c0_g1_i1.path1	0	0	0	0.24	0.78	1.39	0	0	0	2	8	13	48.835	5.61	0.000623914	0.00237335	up	5C	590659815	590660385	-	TRINITY_DN104532_c0_g1_i1	--	--	--	--	--	--	--	--
[truncated: 31,803 more rows]
