# Supplementary material for: Metabolome and Transcriptome Analyses Reveal the Differences in the Molecular Mechanisms of Oat Leaves Responding to Salt and Alkali Stress Conditions
Source: MDPI journal article supplement (doi:10.3390/agronomy13061441), 2023-05-23
Supplement: s1 [file s1 › Supplementary Table S4.xlsx]

## Sheet: Sheet1
Supplementary Table S4 Differentially expressed genes in oat leaves at salinity vs ck
ID	CK1L_fpkm	CK2L_fpkm	CK3L_fpkm	Y1L_fpkm	Y2L_fpkm	Y3L_fpkm	CK1L_count	CK2L_count	CK3L_count	Y1L_count	Y2L_count	Y3L_count	FoldChange	log2FoldChange	pvalue	padj	regulated	chr	start	end	strand	gene_name	gene_description	KEGG	NR	Swissprot	Tremble	KOG	GO	Pfam
TRINITY_DN100_c0_g1_i3.path1	11.98	11.66	10.23	4.49	5.85	8.7	278	335	243	103	169	243	0.47	-1.089	4.68775e-06	7.76999e-05	down	2D	465849787	465851252	+	TRINITY_DN100_c0_g1_i3	--	--	PREDICTED: ocs element-binding factor 1-like [Brachypodium distachyon]	RecName: Full=bZIP transcription factor 11 {ECO:0000305}; Short=AtbZIP11 {ECO:0000303|PubMed:11906833}; AltName: Full=G-box-binding factor 6 {ECO:0000303|Ref.3}; AltName: Full=bZIP transcription factor ATB2 {ECO:0000303|PubMed:9620274};	SubName: Full=Uncharacterized protein {ECO:0000313|EnsemblPlants:TRIAE_CS42_6BS_TGACv1_513373_AA1639310.1};	--	GO:0005634,nucleus; GO:0003700,DNA-binding transcription factor activity; GO:0046982,protein heterodimerization activity; GO:0043565,sequence-specific DNA binding; GO:0017148,negative regulation of translation; GO:0045893,positive regulation of transcription, DNA-templated; GO:0009744,response to sucrose; GO:0080149,sucrose induced translational repression; GO:0006351,transcription, DNA-templated	bZIP transcription factor
TRINITY_DN100_c1_g1_i1.path1	139.49	129.14	121	87.44	71.38	61.44	1316	1509	1168	815	838	698	0.477	-1.066	2.07949e-08	5.72734e-07	down	5D	431213901	431214496	+	TRINITY_DN100_c1_g1_i1	--	K22912 5-amino-6-(5-phospho-D-ribitylamino)uracil phosphatase [EC:3.1.3.104] | (RefSeq) uncharacterized protein LOC109761794 (A)	uncharacterized protein LOC109761794 [Aegilops tauschii subsp. tauschii]	RecName: Full=5-amino-6-(5-phospho-D-ribitylamino)uracil phosphatase, chloroplastic {ECO:0000303|PubMed:27490826}; Short=AtPyrP2 {ECO:0000303|PubMed:27490826}; EC=3.1.3.104 {ECO:0000269|PubMed:27490826}; AltName: Full=5-amino-6-ribitylamino-2,4(1H,3H)-pyrimidinedione 5'-phosphate phosphatase {ECO:0000305|PubMed:27490826}; Short=ARPP phosphatase {ECO:0000305|PubMed:27490826}; AltName: Full=Haloaci…	SubName: Full=Uncharacterized protein {ECO:0000313|EnsemblPlants:TRIAE_CS42_4AL_TGACv1_288978_AA0962570.3};	Predicted haloacid-halidohydrolase and related hydrolases	GO:0009507,chloroplast; GO:0005737,cytoplasm; GO:0016791,phosphatase activity; GO:0043621,protein self-association; GO:0006468,protein phosphorylation; GO:0009231,riboflavin biosynthetic process	--
TRINITY_DN100_c1_g1_i1.path2	97.18	84.93	87.67	51.9	48.9	44.15	923	999	852	487	578	505	0.452	-1.145	1.79878e-10	7.24852e-09	down	5A	482500281	482500880	+	TRINITY_DN100_c1_g1_i1	--	K22912 5-amino-6-(5-phospho-D-ribitylamino)uracil phosphatase [EC:3.1.3.104] | (RefSeq) uncharacterized protein LOC109761794 (A)	uncharacterized protein LOC109761794 [Aegilops tauschii subsp. tauschii]	RecName: Full=5-amino-6-(5-phospho-D-ribitylamino)uracil phosphatase, chloroplastic {ECO:0000303|PubMed:27490826}; Short=AtPyrP2 {ECO:0000303|PubMed:27490826}; EC=3.1.3.104 {ECO:0000269|PubMed:27490826}; AltName: Full=5-amino-6-ribitylamino-2,4(1H,3H)-pyrimidinedione 5'-phosphate phosphatase {ECO:0000305|PubMed:27490826}; Short=ARPP phosphatase {ECO:0000305|PubMed:27490826}; AltName: Full=Haloaci…	SubName: Full=Uncharacterized protein {ECO:0000313|EnsemblPlants:TRIAE_CS42_4AL_TGACv1_288978_AA0962570.3};	Predicted haloacid-halidohydrolase and related hydrolases	GO:0009507,chloroplast; GO:0005737,cytoplasm; GO:0016791,phosphatase activity; GO:0043621,protein self-association; GO:0006468,protein phosphorylation; GO:0009231,riboflavin biosynthetic process	--
TRINITY_DN10002_c0_g1_i2.path1	1.03	0.97	0.96	6.34	10.39	8.93	18	21	17	109	225	187	7.308	2.869	6.17275e-17	6.25644e-15	up	2D	364308707	364310725	+	TRINITY_DN10002_c0_g1_i2	--	--	uncharacterized protein LOC109765515 isoform X2 [Aegilops tauschii subsp. tauschii]	RecName: Full=Protein MARD1 {ECO:0000303|PubMed:15159630}; AltName: Full=Mediator of ABA-regulated dormancy1 {ECO:0000303|PubMed:15159630}; AltName: Full=Senescence-associated protein SAG102 {ECO:0000303|PubMed:11402199};	SubName: Full=Uncharacterized protein {ECO:0000313|EnsemblPlants:TRIAE_CS42_2BL_TGACv1_129310_AA0377810.1};	--	GO:0010494,cytoplasmic stress granule; GO:0000932,P-body; GO:0046872,metal ion binding; GO:0009737,response to abscisic acid; GO:0010162,seed dormancy process	--
TRINITY_DN10002_c0_g1_i2.path2	0.64	0.19	0.51	2.53	2.57	2.8	11	4	9	43	55	58	5.021	2.328	9.24631e-06	0.000141823	up	2A	375339688	375341704	-	TRINITY_DN10002_c0_g1_i2	--	--	uncharacterized protein LOC109765515 isoform X2 [Aegilops tauschii subsp. tauschii]	RecName: Full=Protein MARD1 {ECO:0000303|PubMed:15159630}; AltName: Full=Mediator of ABA-regulated dormancy1 {ECO:0000303|PubMed:15159630}; AltName: Full=Senescence-associated protein SAG102 {ECO:0000303|PubMed:11402199};	SubName: Full=Uncharacterized protein {ECO:0000313|EnsemblPlants:TRIAE_CS42_2BL_TGACv1_129310_AA0377810.1};	--	GO:0010494,cytoplasmic stress granule; GO:0000932,P-body; GO:0046872,metal ion binding; GO:0009737,response to abscisic acid; GO:0010162,seed dormancy process	--
TRINITY_DN100023_c0_g1_i1.path2	6.52	3.92	5	2.2	2.36	3.5	51	38	40	17	23	33	0.437	-1.194	0.00534683	0.0309774	down	Chr00	121978061	121983376	-	TRINITY_DN100023_c0_g1_i1	--	K16616 actin-related protein 8, plant | (RefSeq) LOC109753568; actin-related protein 8 (A)	hypothetical protein LR48_Vigan05g055200 [Vigna angularis]	RecName: Full=Actin-related protein 8; AltName: Full=F-box protein ARP8;	SubName: Full=Uncharacterized protein {ECO:0000313|EMBL:KOM42948.1};	--	GO:0005737,cytoplasm; GO:0005730,nucleolus; GO:0005524,ATP binding	--
TRINITY_DN10007_c0_g1_i1.path1	0.42	0.73	0.58	1.5	1.18	1.91	23	50	33	82	81	127	2.213	1.146	0.000891083	0.00722933	up	5D	454272555	454276963	-	TRINITY_DN10007_c0_g1_i1	--	K20474 RAD50-interacting protein 1 | (RefSeq) LOC109770198; RINT1-like protein MAG2L (A)	hypothetical protein TRIUR3_14501 [Triticum urartu]	RecName: Full=RINT1-like protein MAG2L {ECO:0000305}; AltName: Full=Protein MAIGO 2 homolog {ECO:0000305}; AltName: Full=Protein MAIGO 2-like {ECO:0000303|PubMed:23025793};	SubName: Full=Uncharacterized protein {ECO:0000313|EnsemblPlants:TRIAE_CS42_2AS_TGACv1_114583_AA0368180.1};	ER to golgi transport protein/RAD50-interacting protein 1	GO:0030142,COPI-coated Golgi to ER transport vesicle; GO:0030134,COPII-coated ER to Golgi transport vesicle; GO:0005783,endoplasmic reticulum; GO:0005789,endoplasmic reticulum membrane; GO:0048193,Golgi vesicle transport; GO:0015031,protein transport	RINT-1 / TIP-1 family
TRINITY_DN10008_c0_g1_i1.path2	119.25	182.06	182.58	75.61	52.6	81.39	4768	9016	7470	2987	2617	3919	0.362	-1.464	8.3116e-13	4.86977e-11	down	6C	537283267	537286767	-	TRINITY_DN10008_c0_g1_i1	--	K16055 trehalose 6-phosphate synthase/phosphatase [EC:2.4.1.15 3.1.3.12] | (RefSeq) probable alpha,alpha-trehalose-phosphate synthase [UDP-forming] 11 (A)	PREDICTED: probable alpha,alpha-trehalose-phosphate synthase [UDP-forming]	RecName: Full=Probable alpha,alpha-trehalose-phosphate synthase [UDP-forming] 11; EC=2.4.1.15; AltName: Full=Trehalose-6-phosphate synthase 11; Short=AtTPS11;	SubName: Full=Uncharacterized protein {ECO:0000313|EMBL:KQK01090.1, ECO:0000313|EnsemblPlants:BRADI3G53790.1};	Trehalose-6-phosphate synthase component TPS1 and related subunits	GO:0005829,cytosol; GO:0005739,mitochondrion; GO:0016791,phosphatase activity; GO:0016757,transferase activity, transferring glycosyl groups; GO:0005992,trehalose biosynthetic process; GO:0070413,trehalose metabolism in response to stress	Glycosyltransferase family 20
TRINITY_DN100082_c0_g1_i1.path1	12.18	9.98	7.65	24.13	26.85	32.81	70	71	45	137	192	227	2.363	1.241	4.52694e-06	7.52644e-05	up	4A	420987736	420988098	-	TRINITY_DN100082_c0_g1_i1	--	--	--	--	--	--	--	--
TRINITY_DN100134_c0_g1_i1.path2	5.58	5.38	6.86	16.94	12.15	13.45	31	37	39	93	84	90	2.004	1.003	0.00320753	0.0206015	up	5A	369540948	369541298	-	TRINITY_DN100134_c0_g1_i1	--	--	--	--	--	--	--	--
TRINITY_DN100139_c0_g1_i1.path1	36.15	19.89	30.48	4.53	5.27	7.44	226	154	195	28	41	56	0.166	-2.59	1.18501e-16	1.17504e-14	down	7C	662445148	662445542	+	TRINITY_DN100139_c0_g1_i1	--	--	--	--	--	--	--	--
TRINITY_DN100139_c0_g1_i1.path2	45.92	36.69	58.34	9.13	13.74	23.8	290	287	377	57	108	181	0.273	-1.871	3.27371e-10	1.26688e-08	down	6A	375226147	375226545	+	TRINITY_DN100139_c0_g1_i1	--	--	--	--	--	--	--	--
TRINITY_DN100153_c0_g1_i1.path1	2.24	2.22	3.2	0.35	0	0	13	16	19	2	0	0	0.034	-4.883	7.89099e-05	0.000922747	down	2C	104655314	104656023	+	TRINITY_DN100153_c0_g1_i1	--	K19891 glucan endo-1,3-beta-glucosidase 1/2/3 [EC:3.2.1.39] | (RefSeq) glucan endo-1,3-beta-glucosidase 3 isoform X1 (A)	PREDICTED: glucan endo-1,3-beta-glucosidase 3-like [Brachypodium distachyon]	RecName: Full=Glucan endo-1,3-beta-glucosidase 12; EC=3.2.1.39; AltName: Full=(1->3)-beta-glucan endohydrolase 12; Short=(1->3)-beta-glucanase 12; AltName: Full=Beta-1,3-endoglucanase 12; Short=Beta-1,3-glucanase 12; Flags: Precursor;	SubName: Full=Uncharacterized protein {ECO:0000313|EMBL:KQK15882.1, ECO:0000313|EnsemblPlants:BRADI1G25517.1};	--	GO:0031225,anchored component of membrane; GO:0046658,anchored component of plasma membrane; GO:0005618,cell wall; GO:0005576,extracellular region; GO:0042973,glucan endo-1,3-beta-D-glucosidase activity; GO:0004553,hydrolase activity, hydrolyzing O-glycosyl compounds; GO:0030247,polysaccharide binding; GO:0005975,carbohydrate metabolic process; GO:0071555,cell wall organization; GO:0006952,defens…	X8 domain
TRINITY_DN100155_c0_g1_i1.path2	5.95	6.27	6.07	12.05	19.77	32.46	23	30	24	46	95	151	2.925	1.548	8.88277e-05	0.00102046	up	1A	345686397	345686640	-	TRINITY_DN100155_c0_g1_i1	--	--	--	--	--	--	--	--
TRINITY_DN100195_c0_g1_i1.path1	3.16	3.04	2.99	0.72	1.56	0.76	31	37	30	7	19	9	0.282	-1.825	0.000519423	0.00458902	down	Chr00	30186186	30186805	+	TRINITY_DN100195_c0_g1_i1	--	--	--	--	--	--	--	--
TRINITY_DN100261_c0_g1_i1.path1	6.1	4.51	5.96	1.54	2.18	2.95	36	33	36	9	16	21	0.338	-1.565	0.00120115	0.00923425	down	6D	275091353	275091725	+	TRINITY_DN100261_c0_g1_i1	--	--	--	--	--	--	--	--
TRINITY_DN10030_c0_g1_i3.path1	0	0.11	0.04	0.18	0.14	1.89	0	3	1	4	4	51	11.443	3.516	0.00356376	0.0224185	up	3D	341473214	341476343	-	TRINITY_DN10030_c0_g1_i3	--	K14487 auxin responsive GH3 gene family | (RefSeq) probable indole-3-acetic acid-amido synthetase GH3.2 (A)	PREDICTED: probable indole-3-acetic acid-amido synthetase GH3.2 [Brachypodium distachyon]	RecName: Full=Probable indole-3-acetic acid-amido synthetase GH3.2; EC=6.3.2.-; AltName: Full=Auxin-responsive GH3-like protein 2; Short=OsGH3-2;	SubName: Full=Uncharacterized protein {ECO:0000313|EMBL:KQK09904.1, ECO:0000313|EnsemblPlants:BRADI2G50840.1};	--	GO:0016874,ligase activity; GO:0009733,response to auxin; GO:0009416,response to light stimulus	GH3 auxin-responsive promoter
TRINITY_DN10030_c0_g1_i3.path2	0	0	0	0.32	0.07	2.11	0	0	0	7	2	57	88.177	6.462	0.00462744	0.0276321	up	3A	20722537	20725559	+	TRINITY_DN10030_c0_g1_i3	--	K14487 auxin responsive GH3 gene family | (RAP-DB) Os01g0764800; Similar to Nt-gh3 deduced protein. (A)	hypothetical protein OsJ_03565 [Oryza sativa Japonica Group]	RecName: Full=Probable indole-3-acetic acid-amido synthetase GH3.2; EC=6.3.2.-; AltName: Full=Auxin-responsive GH3-like protein 2; Short=OsGH3-2;	SubName: Full=Uncharacterized protein {ECO:0000313|EMBL:EAZ13648.1};	--	GO:0016874,ligase activity; GO:0009733,response to auxin; GO:0009416,response to light stimulus	GH3 auxin-responsive promoter
TRINITY_DN100308_c0_g1_i1.path1	0.38	0.31	0.64	1.5	1.9	1.14	7	7	12	27	43	25	2.871	1.522	0.00908031	0.0470501	up	4C	521960239	521961387	-	TRINITY_DN100308_c0_g1_i1	--	--	hypothetical protein BRADI_1g04503v3 [Brachypodium distachyon]	--	SubName: Full=Uncharacterized protein {ECO:0000313|EMBL:EMT22166.1, ECO:0000313|EnsemblPlants:EMT22166};	--	--	--
TRINITY_DN100318_c0_g1_i1.path1	1.16	1.01	0.68	0.46	0.37	0.68	48	52	29	19	19	34	0.444	-1.17	0.00659099	0.0366367	down	2D	205568455	205571077	+	TRINITY_DN100318_c0_g1_i1	--	--	--	--	--	--	--	--
TRINITY_DN100321_c0_g1_i1.path1	0	0.14	0.33	3.09	0.82	1.83	0	1	2	18	6	13	10.207	3.352	0.00567146	0.0324675	up	4A	397705793	397706164	+	TRINITY_DN100321_c0_g1_i1	--	--	--	--	--	--	--	--
TRINITY_DN100329_c0_g1_i1.path1	48.96	47.73	55.39	20.35	28.4	38.8	241	291	279	99	174	230	0.48	-1.059	1.3505e-05	0.00019873	down	7C	476517889	476518199	-	TRINITY_DN100329_c0_g1_i1	--	--	--	--	--	--	--	NinF protein
TRINITY_DN100353_c0_g1_i1.path1	5.09	3.89	6.54	0.54	1.08	0.89	19	18	25	2	5	4	0.137	-2.87	8.9257e-05	0.00102426	down	4A	356962328	356962563	+	TRINITY_DN100353_c0_g1_i1	--	--	--	--	--	--	--	--
TRINITY_DN100358_c0_g1_i1.path1	2.7	4.36	2.36	11.21	10.5	7.78	19	38	17	78	92	66	2.648	1.405	0.000290669	0.00280514	up	1C	171325632	171327040	-	TRINITY_DN100358_c0_g1_i1	--	--	--	--	--	--	--	--
TRINITY_DN10037_c1_g1_i1.path1	0.5	1.75	0.65	8.29	9.54	12.21	3	13	4	49	71	88	8.48	3.084	3.41913e-09	1.10955e-07	up	1D	281922273	281922736	-	TRINITY_DN10037_c1_g1_i1	--	K00521 ferric-chelate reductase [EC:1.16.1.7] | (RefSeq) ferric reduction oxidase 7, chloroplastic-like (A)	predicted protein [Hordeum vulgare subsp. vulgare]	RecName: Full=NAC domain-containing protein 48 {ECO:0000303|PubMed:15029955}; Short=ONAC048 {ECO:0000303|PubMed:15029955}; AltName: Full=OsNAC6 {ECO:0000303|PubMed:10660065}; AltName: Full=Protein STRESS-RESPONSIVE NAC 2 {ECO:0000303|PubMed:18273684};	SubName: Full=Predicted protein {ECO:0000313|EMBL:BAJ97015.1};	--	GO:0005634,nucleus; GO:0043565,sequence-specific DNA binding; GO:1901002,positive regulation of response to salt stress; GO:1902584,positive regulation of response to water deprivation; GO:0045893,positive regulation of transcription, DNA-templated; GO:1900150,regulation of defense response to fungus; GO:0040008,regulation of growth; GO:0009409,response to cold; GO:0048364,root development; GO:00…	No apical meristem (NAM) protein
TRINITY_DN10037_c1_g1_i1.path2	1	0.27	0.65	5.92	3.89	9.71	6	2	4	35	29	70	8.587	3.102	2.19261e-06	3.94718e-05	up	1A	289156370	289156833	-	TRINITY_DN10037_c1_g1_i1	--	K00521 ferric-chelate reductase [EC:1.16.1.7] | (RefSeq) ferric reduction oxidase 7, chloroplastic-like (A)	predicted protein [Hordeum vulgare subsp. vulgare]	RecName: Full=NAC domain-containing protein 48 {ECO:0000303|PubMed:15029955}; Short=ONAC048 {ECO:0000303|PubMed:15029955}; AltName: Full=OsNAC6 {ECO:0000303|PubMed:10660065}; AltName: Full=Protein STRESS-RESPONSIVE NAC 2 {ECO:0000303|PubMed:18273684};	SubName: Full=Uncharacterized protein {ECO:0000313|EnsemblPlants:HORVU1Hr1G063740.5};	--	GO:0005634,nucleus; GO:0043565,sequence-specific DNA binding; GO:1901002,positive regulation of response to salt stress; GO:1902584,positive regulation of response to water deprivation; GO:0045893,positive regulation of transcription, DNA-templated; GO:1900150,regulation of defense response to fungus; GO:0040008,regulation of growth; GO:0009409,response to cold; GO:0048364,root development; GO:00…	No apical meristem (NAM) protein
TRINITY_DN10037_c1_g1_i1.path3	9.02	10.8	8.49	34.51	40.69	57.18	54	80	52	204	303	412	3.91	1.967	1.18589e-14	9.25187e-13	up	1C	15873075	15873563	+	TRINITY_DN10037_c1_g1_i1	--	K00521 ferric-chelate reductase [EC:1.16.1.7] | (RefSeq) ferric reduction oxidase 7, chloroplastic-like (A)	predicted protein [Hordeum vulgare subsp. vulgare]	RecName: Full=NAC domain-containing protein 48 {ECO:0000303|PubMed:15029955}; Short=ONAC048 {ECO:0000303|PubMed:15029955}; AltName: Full=OsNAC6 {ECO:0000303|PubMed:10660065}; AltName: Full=Protein STRESS-RESPONSIVE NAC 2 {ECO:0000303|PubMed:18273684};	SubName: Full=Uncharacterized protein {ECO:0000313|EnsemblPlants:HORVU1Hr1G063740.5};	--	GO:0005634,nucleus; GO:0043565,sequence-specific DNA binding; GO:1901002,positive regulation of response to salt stress; GO:1902584,positive regulation of response to water deprivation; GO:0045893,positive regulation of transcription, DNA-templated; GO:1900150,regulation of defense response to fungus; GO:0040008,regulation of growth; GO:0009409,response to cold; GO:0048364,root development; GO:00…	No apical meristem (NAM) protein
TRINITY_DN10038_c0_g1_i7.path1	27.96	28.22	41.85	10.43	10.72	10.45	1180	1475	1807	435	563	531	0.269	-1.894	1.02993e-19	1.37034e-17	down	5A	3627532	3631804	-	TRINITY_DN10038_c0_g1_i7	--	K17469 sulfate transporter 2, low-affinity | (RefSeq) LOC109772858; low affinity sulfate transporter 3-like (A)	predicted protein [Hordeum vulgare subsp. vulgare]	RecName: Full=Low affinity sulfate transporter 3;	SubName: Full=Uncharacterized protein {ECO:0000313|EnsemblPlants:TRIAE_CS42_4AS_TGACv1_306580_AA1010500.1};	Sulfate/bicarbonate/oxalate exchanger SAT-1 and related transporters (SLC26 family)	GO:0016021,integral component of membrane; GO:0008271,secondary active sulfate transmembrane transporter activity	Sulfate permease family
TRINITY_DN10038_c0_g1_i7.path2	14.23	16.42	20.29	6.56	5.98	8.66	602	860	878	274	315	441	0.346	-1.529	1.52305e-13	9.92475e-12	down	1D	447862852	447867156	+	TRINITY_DN10038_c0_g1_i7	--	K17469 sulfate transporter 2, low-affinity | (RefSeq) LOC109772858; low affinity sulfate transporter 3-like (A)	predicted protein [Hordeum vulgare subsp. vulgare]	RecName: Full=Low affinity sulfate transporter 3;	SubName: Full=Uncharacterized protein {ECO:0000313|EnsemblPlants:TRIAE_CS42_4AS_TGACv1_306580_AA1010500.1};	Sulfate/bicarbonate/oxalate exchanger SAT-1 and related transporters (SLC26 family)	GO:0016021,integral component of membrane; GO:0008271,secondary active sulfate transmembrane transporter activity	Sulfate permease family
TRINITY_DN100383_c0_g1_i1.path2	4.88	6.26	5.63	15.93	10.87	15.65	22	35	26	71	61	85	2.117	1.082	0.0032721	0.0209236	up	6D	36826461	36826745	+	TRINITY_DN100383_c0_g1_i1	--	--	hypothetical protein PAHAL_A00978 [Panicum hallii]	--	SubName: Full=Uncharacterized protein {ECO:0000313|EMBL:JAD89178.1};	--	GO:0016021,integral component of membrane; GO:0005524,ATP binding; GO:0004672,protein kinase activity	--
TRINITY_DN10041_c0_g1_i1.path1	0.62	1.4	1.07	3.34	2.55	3.21	25	70	44	133	128	156	2.471	1.305	4.54703e-05	0.000573701	up	5A	415556696	415560968	-	TRINITY_DN10041_c0_g1_i1	--	K12175 COP9 signalosome complex subunit 1 | (RefSeq) probable methyltransferase PMT15 (A)	putative methyltransferase PMT2 [Triticum urartu]	RecName: Full=Probable methyltransferase PMT2; EC=2.1.1.-;	SubName: Full=Uncharacterized protein {ECO:0000313|EnsemblPlants:TRIAE_CS42_5AL_TGACv1_374351_AA1197740.1};	--	GO:0005737,cytoplasm; GO:0005768,endosome; GO:0005794,Golgi apparatus; GO:0000139,Golgi membrane; GO:0016021,integral component of membrane; GO:0016020,membrane; GO:0005802,trans-Golgi network; GO:0008757,S-adenosylmethionine-dependent methyltransferase activity; GO:0032259,methylation	Putative S-adenosyl-L-methionine-dependent methyltransferase
TRINITY_DN100432_c0_g1_i1.path1	2.03	1.76	1.56	4.26	5.6	5.67	14	15	11	29	48	47	2.447	1.291	0.00695826	0.0382281	up	4A	377167644	377168078	+	TRINITY_DN100432_c0_g1_i1	--	--	--	--	--	--	--	--
TRINITY_DN100444_c0_g1_i1.path2	3.63	2.76	2.5	9.29	8.75	11.52	17	16	12	43	51	65	2.797	1.484	0.000747177	0.00624388	up	7A	52760412	52760707	+	TRINITY_DN100444_c0_g1_i1	--	--	--	--	--	--	--	--
TRINITY_DN100450_c0_g1_i1.path3	57.88	49.5	50.49	11.34	10.5	13.44	372	394	332	72	84	104	0.187	-2.418	1.80827e-28	4.90102e-26	down	4D	246939046	246945862	+	TRINITY_DN100450_c0_g1_i1	--	--	PREDICTED: uncharacterized protein LOC100833124 [Brachypodium distachyon]	--	SubName: Full=Uncharacterized protein {ECO:0000313|EnsemblPlants:BRADI1G14307.1};	--	GO:0005524,ATP binding; GO:0016301,kinase activity	--
TRINITY_DN100467_c0_g1_i1.path1	9.26	7.09	4.18	23.56	14.5	19.72	39	37	18	98	76	100	2.372	1.246	0.000773219	0.00642482	up	4D	231021036	231021301	-	TRINITY_DN100467_c0_g1_i1	--	--	--	--	--	--	--	--
TRINITY_DN100493_c0_g1_i1.path1	0.46	0.19	0	8.17	4.26	4.98	2	1	0	35	23	26	23.062	4.527	1.12932e-05	0.000169489	up	7C	1965273	1965665	+	TRINITY_DN100493_c0_g1_i1	--	--	--	--	--	--	--	--
TRINITY_DN100517_c0_g1_i1.path1	0	0.18	0	1.77	2.46	3.09	0	1	0	8	14	17	28.211	4.818	0.00100741	0.00798803	up	5D	79808196	79808484	-	TRINITY_DN100517_c0_g1_i1	--	--	--	--	--	--	--	--
TRINITY_DN10053_c0_g4_i1.path1	0.86	1.29	0.9	7.03	7.11	7.2	14	26	15	113	144	141	5.861	2.551	1.2538e-13	8.29582e-12	up	7A	427612645	427614837	+	TRINITY_DN10053_c0_g4_i1	--	K10251 17beta-estradiol 17-dehydrogenase / very-long-chain 3-oxoacyl-CoA reductase [EC:1.1.1.62 1.1.1.330] | (RefSeq) LOC109743960; very-long-chain 3-oxoacyl-CoA reductase 1-like (A)	very-long-chain 3-oxoacyl-CoA reductase 1-like [Aegilops tauschii subsp. tauschii]	RecName: Full=Very-long-chain 3-oxoacyl-CoA reductase 1; EC=1.1.1.330; AltName: Full=Beta-ketoacyl reductase 1; Short=AtKCR1; AltName: Full=Protein GLOSSY 8; Short=gl8At;	SubName: Full=Uncharacterized protein {ECO:0000313|EnsemblPlants:TRIAE_CS42_7DS_TGACv1_622265_AA2036720.1};	--	GO:0005783,endoplasmic reticulum; GO:0005789,endoplasmic reticulum membrane; GO:0016021,integral component of membrane; GO:0016020,membrane; GO:0102339,3-oxo-arachidoyl-CoA reductase activity; GO:0102340,3-oxo-behenoyl-CoA reductase activity; GO:0102342,3-oxo-cerotoyl-CoA reductase activity; GO:0102341,3-oxo-lignoceroyl-CoA reductase activity; GO:0018454,acetoacetyl-CoA reductase activity; GO:004…	short chain dehydrogenase
TRINITY_DN100535_c0_g1_i1.path1	3.56	3.79	2.37	0.16	0.52	2.42	22	29	15	1	4	18	0.266	-1.908	0.00871527	0.0455749	down	7C	318156106	318156495	+	TRINITY_DN100535_c0_g1_i1	--	--	--	--	--	--	--	--
TRINITY_DN100540_c0_g1_i1.path1	130.75	106.28	103.26	73.08	74.65	49.72	594	598	480	328	422	272	0.491	-1.026	4.20308e-06	7.03999e-05	down	5C	499296954	499297240	-	TRINITY_DN100540_c0_g1_i1	--	--	hypothetical protein BRADI_4g30740v3 [Brachypodium distachyon]	--	RecName: Full=WAT1-related protein {ECO:0000256|RuleBase:RU363077};	--	GO:0016021,integral component of membrane; GO:0022857,transmembrane transporter activity	--
TRINITY_DN100558_c0_g1_i1.path2	5.41	9.72	3.82	30.45	23.45	24.73	18	40	13	100	97	99	3.491	1.803	2.08595e-06	3.77187e-05	up	6D	182527823	182528032	+	TRINITY_DN100558_c0_g1_i1	--	K14638 solute carrier family 15 (peptide/histidine transporter), member 3/4 | (RefSeq) hypothetical protein (A)	PREDICTED: MACPF domain-containing protein At1g14780-like isoform X1 [Brachypodium distachyon]	RecName: Full=MACPF domain-containing protein At1g14780;	SubName: Full=Uncharacterized protein {ECO:0000313|EMBL:KQK02019.1, ECO:0000313|EnsemblPlants:BRADI3G59900.1};	--	GO:0009626,plant-type hypersensitive response	--
TRINITY_DN100558_c0_g1_i1.path3	2.11	6.32	2.35	28.93	21.27	18.99	7	26	8	95	88	76	5.38	2.427	6.80974e-08	1.69615e-06	up	6A	211582175	211582384	+	TRINITY_DN100558_c0_g1_i1	--	K14638 solute carrier family 15 (peptide/histidine transporter), member 3/4 | (RefSeq) hypothetical protein (A)	PREDICTED: MACPF domain-containing protein At1g14780-like isoform X1 [Brachypodium distachyon]	RecName: Full=MACPF domain-containing protein At1g14780;	SubName: Full=Uncharacterized protein {ECO:0000313|EMBL:KQK02019.1, ECO:0000313|EnsemblPlants:BRADI3G59900.1};	--	GO:0009626,plant-type hypersensitive response	--
TRINITY_DN10061_c0_g1_i1.path3	0.07	0.02	0.11	0.28	0.31	0.51	3	1	5	12	17	27	4.679	2.226	0.00796589	0.042519	up	4C	31476572	31479335	-	TRINITY_DN10061_c0_g1_i1	--	K15631 molybdenum cofactor sulfurtransferase [EC:2.8.1.9] | (RefSeq) molybdenum cofactor sulfurase-like (A)	uncharacterized protein LOC109761692 [Aegilops tauschii subsp. tauschii]	RecName: Full=Molybdenum cofactor sulfurase {ECO:0000255|HAMAP-Rule:MF_03050}; Short=MCS {ECO:0000255|HAMAP-Rule:MF_03050}; Short=MOS {ECO:0000255|HAMAP-Rule:MF_03050}; Short=MoCo sulfurase {ECO:0000255|HAMAP-Rule:MF_03050}; EC=2.8.1.9 {ECO:0000255|HAMAP-Rule:MF_03050}; AltName: Full=Molybdenum cofactor sulfurase-like protein 3 {ECO:0000255|HAMAP-Rule:MF_03050}; AltName: Full=Molybdenum cofactor …	SubName: Full=Uncharacterized protein {ECO:0000313|EnsemblPlants:TRIAE_CS42_5DS_TGACv1_457952_AA1490990.2};	Molybdenum cofactor sulfurase	GO:0008265,Mo-molybdopterin cofactor sulfurase activity; GO:0102867,molybdenum cofactor sulfurtransferase activity; GO:0030151,molybdenum ion binding; GO:0030170,pyridoxal phosphate binding; GO:0006777,Mo-molybdopterin cofactor biosynthetic process	--
TRINITY_DN100643_c0_g1_i1.path1	230.86	212.42	185.73	68.15	63.51	58.72	888	1012	731	259	304	272	0.255	-1.971	3.60695e-27	8.5699e-25	down	3C	577995495	577995737	+	TRINITY_DN100643_c0_g1_i1	--	--	--	--	--	--	--	--
TRINITY_DN100658_c0_g1_i1.path1	0.68	0.24	0.19	1.97	1.09	2.26	7	3	2	20	14	28	4.068	2.024	0.00855415	0.0449121	up	3C	105041152	105041801	-	TRINITY_DN100658_c0_g1_i1	--	--	PREDICTED: uncharacterized protein LOC4345264 [Oryza sativa Japonica Group]	--	SubName: Full=Uncharacterized protein {ECO:0000313|EnsemblPlants:TRIAE_CS42_U_TGACv1_641052_AA2083430.1};	--	GO:0004190,aspartic-type endopeptidase activity	--
TRINITY_DN100695_c0_g1_i1.path1	4.3	5.21	2.89	9.25	14.47	10.72	16	24	11	34	67	48	2.352	1.234	0.00659802	0.0366702	up	4D	270111827	270112061	-	TRINITY_DN100695_c0_g1_i1	--	--	--	--	--	--	--	--
TRINITY_DN100762_c0_g1_i1.path1	0.95	1.28	0.93	6.71	6.6	4.2	3	5	3	21	26	16	4.694	2.231	0.00311108	0.0200941	up	6C	606415595	606415794	-	TRINITY_DN100762_c0_g1_i1	--	--	--	--	--	--	--	--
TRINITY_DN100795_c0_g1_i1.path1	2.92	5.01	8.21	1.11	0.15	0.91	16	34	46	6	1	6	0.109	-3.203	3.54747e-06	6.08105e-05	down	2A	357019878	357020223	+	TRINITY_DN100795_c0_g1_i1	--	--	--	--	--	--	--	--
TRINITY_DN100795_c0_g1_i1.path2	2.39	1.64	4.86	1.49	0	0.31	13	11	27	8	0	2	0.161	-2.634	0.00345207	0.0218496	down	2D	381811981	381812323	-	TRINITY_DN100795_c0_g1_i1	--	--	predicted protein [Hordeum vulgare subsp. vulgare]	--	SubName: Full=Uncharacterized protein {ECO:0000313|EnsemblPlants:HORVU2Hr1G090690.2};	--	--	--
TRINITY_DN1008_c0_g2_i2.path1	6.49	9.29	6.37	20.85	17.67	15.77	215	381	216	682	728	629	2.077	1.055	4.7233e-07	9.92097e-06	up	4A	82964851	82971440	+	TRINITY_DN1008_c0_g2_i2	--	K00600 glycine hydroxymethyltransferase [EC:2.1.2.1] | (RefSeq) LOC109770763; serine hydroxymethyltransferase 4 (A)	hypothetical protein BRADI_4g19470v3 [Brachypodium distachyon]	RecName: Full=Serine hydroxymethyltransferase 4; Short=AtSHMT4; EC=2.1.2.1; AltName: Full=Glycine hydroxymethyltransferase 4; AltName: Full=Serine methylase 4;	RecName: Full=Serine hydroxymethyltransferase {ECO:0000256|RuleBase:RU000585}; EC=2.1.2.1 {ECO:0000256|RuleBase:RU000585};	Glycine/serine hydroxymethyltransferase	GO:0005829,cytosol; GO:0016020,membrane; GO:0005886,plasma membrane; GO:0009506,plasmodesma; GO:0004372,glycine hydroxymethyltransferase activity; GO:0030170,pyridoxal phosphate binding; GO:0007623,circadian rhythm; GO:0019264,glycine biosynthetic process from serine; GO:0046686,response to cadmium ion; GO:0035999,tetrahydrofolate interconversion	Serine hydroxymethyltransferase
TRINITY_DN10081_c0_g1_i2.path1	0.78	0.92	0.77	3.83	2.66	2.11	48	70	48	232	203	156	2.949	1.56	1.97563e-07	4.50742e-06	up	7C	695118114	695121984	+	TRINITY_DN10081_c0_g1_i2	--	--	--	--	--	--	--	--
TRINITY_DN10081_c0_g2_i1.path1	4.28	4.22	3.55	10.88	8.39	10	86	105	73	216	210	242	2.044	1.031	1.84364e-05	0.000262074	up	1A	241653225	241654494	+	TRINITY_DN10081_c0_g2_i1	--	--	--	--	--	--	--	--
TRINITY_DN10081_c0_g2_i1.path2	3.53	4.02	3.55	12.34	10.39	7.77	71	100	73	245	260	188	2.326	1.218	5.00112e-06	8.22236e-05	up	1D	232178306	232179575	+	TRINITY_DN10081_c0_g2_i1	--	--	--	--	--	--	--	--
TRINITY_DN100817_c0_g1_i1.path1	8.5	8.5	6.5	2.99	4.01	3.99	46	57	36	16	27	26	0.395	-1.339	0.00103044	0.00812922	down	1D	284633157	284633498	-	TRINITY_DN100817_c0_g1_i1	--	--	--	--	--	--	--	--
TRINITY_DN100843_c0_g1_i1.path1	7.36	12.63	15.75	3.66	2.82	7.18	63	134	138	31	30	74	0.316	-1.663	1.04868e-05	0.000158524	down	5C	166676780	166677320	-	TRINITY_DN100843_c0_g1_i1	--	--	--	--	--	--	--	--
TRINITY_DN100851_c0_g1_i1.path1	0.78	0.21	0.51	20.79	11.28	19	3	1	2	79	54	88	29.543	4.885	8.5196e-12	4.31457e-10	up	3A	21590756	21590998	-	TRINITY_DN100851_c0_g1_i1	--	--	hypothetical protein BRADI_2g48735v3 [Brachypodium distachyon]	--	SubName: Full=Uncharacterized protein {ECO:0000313|EMBL:KQK09558.1};	--	--	--
TRINITY_DN100867_c0_g1_i1.path1	1.85	3.48	6.02	14.35	11.14	17.15	6	14	20	46	45	67	3.122	1.643	0.000805987	0.0066529	up	5A	326672296	326672500	-	TRINITY_DN100867_c0_g1_i1	--	--	--	--	--	--	--	--
TRINITY_DN10090_c0_g2_i12.path1	7.03	5.86	4.85	3.17	3.74	3.55	92	95	65	41	61	56	0.498	-1.006	0.00122433	0.00938269	down	5C	291688803	291689888	+	TRINITY_DN10090_c0_g2_i12	--	K07517 Delta3-Delta2-enoyl-CoA isomerase [EC:5.3.3.8] | (RefSeq) uncharacterized protein LOC18427060 (A)	uncharacterized protein LOC8076292 [Sorghum bicolor]	--	SubName: Full=Uncharacterized protein {ECO:0000313|EnsemblPlants:TRIAE_CS42_4DS_TGACv1_361580_AA1170350.2};	--	--	Myb/SANT-like DNA-binding domain
TRINITY_DN100921_c0_g1_i1.path1	9.58	13.8	4.3	0.26	2.29	2.58	37	66	17	1	11	12	0.16	-2.642	1.91812e-05	0.000271134	down	1A	365331578	365331821	-	TRINITY_DN100921_c0_g1_i1	--	--	--	--	--	--	--	--
TRINITY_DN10094_c0_g1_i2.path1	2.04	4.26	5.16	7.5	8.89	13.29	24	62	62	87	130	188	2.151	1.105	0.00160137	0.0116915	up	7A	405705333	405706074	-	TRINITY_DN10094_c0_g1_i2	--	K05894 12-oxophytodienoic acid reductase [EC:1.3.1.42] | (RefSeq) LOC109742120; 12-oxophytodienoate reductase 1-like (A)	predicted protein [Hordeum vulgare subsp. vulgare]	RecName: Full=12-oxophytodienoate reductase 1; EC=1.3.1.42; AltName: Full=12-oxophytodienoate-10,11-reductase 1; Short=OPDA-reductase 1; Short=OsOPR1;	SubName: Full=Uncharacterized protein {ECO:0000313|EnsemblPlants:TRIAE_CS42_7DS_TGACv1_622140_AA2033640.1};	NADH:flavin oxidoreductase/12-oxophytodienoate reductase	GO:0005622,intracellular; GO:0016629,12-oxophytodienoate reductase activity; GO:0010181,FMN binding; GO:0006952,defense response; GO:0009695,jasmonic acid biosynthetic process; GO:0031408,oxylipin biosynthetic process	--
TRINITY_DN100944_c0_g1_i1.path1	34.65	44.82	48.55	61.77	104	170.87	113	181	162	199	422	671	2.177	1.122	0.000115886	0.00127871	up	5A	5806993	5807198	-	TRINITY_DN100944_c0_g1_i1	--	--	--	--	--	--	--	--
TRINITY_DN101_c0_g1_i4.path1	0.11	0	0	11.06	8.86	5.26	2	0	0	207	209	120	220.094	7.782	4.26013e-13	2.6001e-11	up	4D	272433756	272435132	+	TRINITY_DN101_c0_g1_i4	--	--	--	--	--	--	--	--
TRINITY_DN101037_c0_g1_i1.path1	37.74	25.73	25.54	10.89	13.14	12.3	270	228	187	77	117	106	0.344	-1.541	1.01293e-09	3.62648e-08	down	1D	323810764	323811289	+	TRINITY_DN101037_c0_g1_i1	--	K14652 3,4-dihydroxy 2-butanone 4-phosphate synthase / GTP cyclohydrolase II [EC:4.1.99.12 3.5.4.25] | (RefSeq) LOC109749705; probable monofunctional riboflavin biosynthesis protein RIBA 3, chloroplastic isoform X1 (A)	probable monofunctional riboflavin biosynthesis protein RIBA 3, chloroplastic isoform X2 [Aegilops tauschii subsp. tauschii]	RecName: Full=Probable monofunctional riboflavin biosynthesis protein RIBA 3, chloroplastic; Includes: RecName: Full=Inactive 3,4-dihydroxy-2-butanone 4-phosphate synthase; Short=DHBP synthase; Includes: RecName: Full=GTP cyclohydrolase-2; EC=3.5.4.25; AltName: Full=GTP cyclohydrolase II; Flags: Precursor;	SubName: Full=Uncharacterized protein {ECO:0000313|EnsemblPlants:HORVU1Hr1G072180.7};	Bifunctional GTP cyclohydrolase II/3,4-dihydroxy-2butanone-4-phosphate synthase	GO:0009507,chloroplast; GO:0005737,cytoplasm; GO:0008686,3,4-dihydroxy-2-butanone-4-phosphate synthase activity; GO:0005525,GTP binding; GO:0003935,GTP cyclohydrolase II activity; GO:0046872,metal ion binding; GO:0009231,riboflavin biosynthetic process	GTP cyclohydrolase II
TRINITY_DN101037_c0_g1_i1.path2	33.48	32.8	52.98	21.13	29.15	9.65	239	290	387	149	259	83	0.425	-1.234	0.000268581	0.00262095	down	1A	329856333	329856853	+	TRINITY_DN101037_c0_g1_i1	--	K14652 3,4-dihydroxy 2-butanone 4-phosphate synthase / GTP cyclohydrolase II [EC:4.1.99.12 3.5.4.25] | (RefSeq) LOC109749705; probable monofunctional riboflavin biosynthesis protein RIBA 3, chloroplastic isoform X1 (A)	probable monofunctional riboflavin biosynthesis protein RIBA 3, chloroplastic isoform X2 [Aegilops tauschii subsp. tauschii]	RecName: Full=Probable monofunctional riboflavin biosynthesis protein RIBA 3, chloroplastic; Includes: RecName: Full=Inactive 3,4-dihydroxy-2-butanone 4-phosphate synthase; Short=DHBP synthase; Includes: RecName: Full=GTP cyclohydrolase-2; EC=3.5.4.25; AltName: Full=GTP cyclohydrolase II; Flags: Precursor;	SubName: Full=Uncharacterized protein {ECO:0000313|EnsemblPlants:HORVU1Hr1G072180.7};	Bifunctional GTP cyclohydrolase II/3,4-dihydroxy-2butanone-4-phosphate synthase	GO:0009507,chloroplast; GO:0005737,cytoplasm; GO:0008686,3,4-dihydroxy-2-butanone-4-phosphate synthase activity; GO:0005525,GTP binding; GO:0003935,GTP cyclohydrolase II activity; GO:0046872,metal ion binding; GO:0009231,riboflavin biosynthetic process	GTP cyclohydrolase II
TRINITY_DN101041_c0_g1_i1.path1	12.73	14.68	9.99	4.37	5.84	9.81	56	80	45	19	32	52	0.45	-1.153	0.00263356	0.0175776	down	3A	353996744	353997021	-	TRINITY_DN101041_c0_g1_i1	--	--	PREDICTED: serine/threonine-protein kinase HT1-like [Brachypodium distachyon]	--	SubName: Full=Uncharacterized protein {ECO:0000313|EnsemblPlants:HORVU3Hr1G026870.4};	--	GO:0005524,ATP binding; GO:0004672,protein kinase activity	TMC domain
TRINITY_DN101041_c0_g1_i1.path2	9.54	12.66	9.55	4.83	2.92	6.79	42	69	43	21	16	36	0.382	-1.388	0.000829753	0.00681181	down	3C	79953770	79954047	+	TRINITY_DN101041_c0_g1_i1	--	--	PREDICTED: serine/threonine-protein kinase HT1-like [Brachypodium distachyon]	--	SubName: Full=Uncharacterized protein {ECO:0000313|EnsemblPlants:HORVU3Hr1G026870.4};	--	GO:0005524,ATP binding; GO:0004672,protein kinase activity	--
TRINITY_DN10105_c0_g1_i1.path1	7.15	5.52	4.33	2.53	2.58	3.53	229	219	142	80	103	136	0.426	-1.229	1.85565e-06	3.4085e-05	down	7A	324387834	324391648	+	TRINITY_DN10105_c0_g1_i1	--	--	--	--	--	--	--	--
TRINITY_DN101056_c0_g1_i1.path1	0.46	1.1	1.23	0	0.27	0.09	4	12	11	0	3	1	0.117	-3.1	0.00886758	0.0461964	down	7A	142820355	142820908	-	TRINITY_DN101056_c0_g1_i1	--	--	--	--	--	--	--	--
TRINITY_DN101056_c0_g1_i1.path2	1.48	2.11	2.11	0.58	0.09	0.95	13	23	19	5	1	10	0.232	-2.106	0.00472833	0.0280989	down	1D	231162292	231162846	-	TRINITY_DN101056_c0_g1_i1	--	--	--	--	--	--	--	--
TRINITY_DN101074_c0_g1_i1.path1	8.11	5.19	4.1	21.22	23.36	15.32	29	23	15	75	104	66	2.93	1.551	9.95494e-05	0.0011237	up	2C	440251741	440251966	-	TRINITY_DN101074_c0_g1_i1	--	--	UDP-glycosyltransferase 85A2 [Triticum urartu]	--	RecName: Full=Glycosyltransferase {ECO:0000256|RuleBase:RU362057}; EC=2.4.1.- {ECO:0000256|RuleBase:RU362057};	--	GO:0016758,transferase activity, transferring hexosyl groups; GO:0008152,metabolic process	--
TRINITY_DN101112_c0_g1_i1.path1	32.21	22	23.61	89.96	63.71	62.75	104	88	78	287	256	244	2.346	1.23	3.86907e-06	6.55556e-05	up	7D	316171149	316171352	-	TRINITY_DN101112_c0_g1_i1	--	--	--	--	--	--	--	--
TRINITY_DN101134_c0_g1_i1.path1	10.83	12.32	5.1	1.92	1.72	2.04	137	193	66	24	27	31	0.17	-2.556	6.80338e-13	4.03783e-11	down	1C	191883244	191884042	+	TRINITY_DN101134_c0_g1_i1	--	--	predicted protein [Hordeum vulgare subsp. vulgare]	--	SubName: Full=Uncharacterized protein {ECO:0000313|EnsemblPlants:HORVU3Hr1G049440.1};	--	--	--
TRINITY_DN101162_c0_g1_i1.path1	6.36	8.07	8.14	2.76	1.34	3.27	42	66	55	18	11	26	0.271	-1.885	1.18031e-05	0.000176273	down	1A	445767742	445769026	-	TRINITY_DN101162_c0_g1_i1	--	--	--	--	--	--	--	--
TRINITY_DN101186_c0_g1_i1.path1	14.7	10.63	8.36	4.66	6.52	6.56	67	60	39	21	37	36	0.445	-1.168	0.00254804	0.0171224	down	6C	267878891	267879178	+	TRINITY_DN101186_c0_g1_i1	--	--	--	--	--	--	--	--
TRINITY_DN10119_c0_g1_i3.path1	3.09	3.35	1.83	1.44	1.47	1.69	76	102	46	35	45	50	0.47	-1.09	0.00139618	0.0104256	down	5D	394286888	394288905	+	TRINITY_DN10119_c0_g1_i3	--	K00927 phosphoglycerate kinase [EC:2.7.2.3] | (RefSeq) uncharacterized protein LOC109779783 isoform X1 (A)	uncharacterized protein LOC109779783 isoform X1 [Aegilops tauschii subsp. tauschii]	RecName: Full=Phosphoglycerate kinase 2, chloroplastic; EC=2.7.2.3; Flags: Precursor;	RecName: Full=Phosphoglycerate kinase {ECO:0000256|RuleBase:RU000532}; EC=2.7.2.3 {ECO:0000256|RuleBase:RU000532};	3-phosphoglycerate kinase	GO:0009507,chloroplast; GO:0009570,chloroplast stroma; GO:0016020,membrane; GO:0005739,mitochondrion; GO:0009536,plastid; GO:0009579,thylakoid; GO:0005524,ATP binding; GO:0004618,phosphoglycerate kinase activity; GO:0004672,protein kinase activity; GO:0006096,glycolytic process; GO:0019253,reductive pentose-phosphate cycle; GO:0050691,regulation of defense response to virus by host; GO:0046686,re…	Phosphoglycerate kinase
TRINITY_DN10123_c0_g2_i1.path1	1.27	1.43	1.19	0.48	0.98	0.71	43	60	41	16	41	29	0.473	-1.081	0.00790114	0.0422504	down	3D	116393841	116396533	+	TRINITY_DN10123_c0_g2_i1	--	--	--	--	SubName: Full=Uncharacterized protein {ECO:0000313|EnsemblPlants:TRIUR3_14159-P1};	--	GO:0003676,nucleic acid binding; GO:0008270,zinc ion binding	--
TRINITY_DN10127_c0_g2_i1.path1	4.36	5.18	3.59	1.2	1.42	2.46	165	243	139	45	67	112	0.325	-1.623	8.70004e-09	2.5849e-07	down	2A	399501225	399503617	+	TRINITY_DN10127_c0_g2_i1	--	--	--	--	--	--	--	--
TRINITY_DN10127_c0_g2_i1.path2	2.09	2.3	1.5	0.51	0.66	1.58	79	108	58	19	31	72	0.389	-1.361	0.000513649	0.00454349	down	1A	18138819	18141211	-	TRINITY_DN10127_c0_g2_i1	--	--	--	--	--	--	--	--
TRINITY_DN10127_c0_g5_i2.path1	23.53	17.8	12.91	7.04	8.61	10.19	301	282	169	89	137	157	0.401	-1.319	2.53685e-07	5.64783e-06	down	6A	426046517	426047923	+	TRINITY_DN10127_c0_g5_i2	--	--	--	--	--	--	--	--
TRINITY_DN101270_c0_g1_i1.path1	3.05	3.61	2.58	10.49	8.32	14.68	15	22	13	51	51	87	3.026	1.598	0.000170613	0.00178082	up	5C	303876205	303880194	+	TRINITY_DN101270_c0_g1_i1	--	--	--	--	--	--	--	--
TRINITY_DN101283_c0_g1_i1.path1	0.26	0.43	0.17	1.52	3.05	1.98	3	6	2	17	43	27	6.361	2.669	0.000220437	0.00221951	up	2A	37752658	37755025	+	TRINITY_DN101283_c0_g1_i1	--	--	--	--	--	--	--	--
TRINITY_DN101303_c0_g1_i1.path1	72.94	32.87	26.41	12.36	12.56	8.25	448	250	166	75	96	61	0.212	-2.236	5.13567e-11	2.26809e-09	down	7A	478237077	478237464	+	TRINITY_DN101303_c0_g1_i1	--	--	--	--	--	--	--	--
TRINITY_DN10132_c0_g1_i4.path1	3.42	3.2	3.57	11.87	11.55	10.04	75	87	80	257	315	265	2.767	1.468	8.57966e-10	3.1051e-08	up	7A	318458958	318460533	+	TRINITY_DN10132_c0_g1_i4	--	K09338 homeobox-leucine zipper protein | (RAP-DB) Os08g0481400, HOMEOBOX_GENE_20, HOX20; Similar to HAHB-7 (Fragment). (A)	PREDICTED: homeobox-leucine zipper protein HOX20 [Oryza sativa Japonica Group]	RecName: Full=Homeobox-leucine zipper protein HOX20; AltName: Full=HD-ZIP protein HOX20; AltName: Full=Homeodomain transcription factor HOX20; AltName: Full=OsHox20;	SubName: Full=Uncharacterized protein {ECO:0000313|EnsemblPlants:OPUNC08G16250.1};	Transcription factor HEX, contains HOX and HALZ domains	GO:0005634,nucleus; GO:0003700,DNA-binding transcription factor activity; GO:0043565,sequence-specific DNA binding; GO:0006351,transcription, DNA-templated	Homeobox domain
TRINITY_DN10132_c1_g1_i3.path1	0.18	0.66	0.18	3.79	6.91	4.71	2	9	2	41	94	62	12.358	3.627	1.59961e-09	5.5242e-08	up	1D	449498133	449499184	-	TRINITY_DN10132_c1_g1_i3	--	K09338 homeobox-leucine zipper protein | (RefSeq) homeobox-leucine zipper protein ATHB-16 (A)	predicted protein [Hordeum vulgare subsp. vulgare]	RecName: Full=Homeobox-leucine zipper protein HOX13; AltName: Full=HD-ZIP protein HOX13; AltName: Full=Homeodomain transcription factor HOX13; AltName: Full=OsHox13;	SubName: Full=Uncharacterized protein {ECO:0000313|EnsemblPlants:HORVU4Hr1G078410.4};	Transcription factor HEX, contains HOX and HALZ domains	GO:0005634,nucleus; GO:0003700,DNA-binding transcription factor activity; GO:0043565,sequence-specific DNA binding; GO:0006351,transcription, DNA-templated	Homeobox domain
TRINITY_DN10134_c0_g2_i1.path2	0.78	2.5	1.89	8.43	6.07	4.02	4	16	10	43	39	25	3.015	1.592	0.00574302	0.0328027	up	7D	507319025	507319350	+	TRINITY_DN10134_c0_g2_i1	--	--	--	--	--	--	--	--
TRINITY_DN101362_c0_g1_i1.path1	18.37	7.99	10.85	6.33	6.16	3.69	91	49	55	31	38	22	0.367	-1.447	0.000551386	0.00482712	down	7D	395102958	395103348	+	TRINITY_DN101362_c0_g1_i1	--	--	--	--	--	--	--	--
TRINITY_DN10137_c1_g1_i1.path1	16.59	15.36	15.57	4.28	6.86	7.36	204	234	196	52	105	109	0.327	-1.611	2.03553e-10	8.13091e-09	down	6C	180126423	180128320	+	TRINITY_DN10137_c1_g1_i1	--	K08065 nuclear transcription Y subunit beta | (RefSeq) nuclear transcription factor Y subunit B-1-like (A)	Nuclear transcription factor Y subunit B-8 [Glycine soja]	--	SubName: Full=Nuclear transcription factor Y subunit B-8 {ECO:0000313|EMBL:KHN31648.1};	--	GO:0046982,protein heterodimerization activity	--
TRINITY_DN101373_c0_g1_i1.path2	7.9	6.74	11.91	4.8	4.71	4.31	35	37	54	21	26	23	0.435	-1.2	0.00594571	0.0337288	down	1D	141918830	141919109	+	TRINITY_DN101373_c0_g1_i1	--	--	--	--	--	--	--	--
TRINITY_DN101407_c0_g1_i1.path1	29.71	20.52	18.71	10.51	11.79	10.7	166	142	107	58	82	72	0.404	-1.309	3.97396e-06	6.70688e-05	down	3C	326313490	326313842	-	TRINITY_DN101407_c0_g1_i1	--	--	--	--	--	--	--	--
TRINITY_DN101422_c0_g1_i1.path1	6.58	8.66	6.43	0.18	0.7	1.15	38	62	38	1	5	8	0.08	-3.638	5.98626e-10	2.21583e-08	down	2C	2244686	2245050	-	TRINITY_DN101422_c0_g1_i1	--	--	--	--	--	--	--	--
TRINITY_DN101432_c0_g1_i1.path1	21.97	14.99	19.8	5.86	6.43	9.33	129	109	119	34	47	66	0.318	-1.652	9.99203e-08	2.42041e-06	down	6A	402395966	402396336	-	TRINITY_DN101432_c0_g1_i1	--	--	--	--	--	--	--	--
TRINITY_DN101478_c0_g1_i1.path1	0.82	1.23	0	2.97	3.48	3.02	7	13	0	25	37	31	3.9	1.964	0.00399606	0.0245449	up	7A	6726258	6726796	-	TRINITY_DN101478_c0_g1_i1	--	--	--	--	--	--	--	Reverse transcriptase-like
TRINITY_DN10148_c0_g2_i5.path1	7.68	8.64	8.21	3.15	3.51	7.39	244	340	267	99	139	283	0.476	-1.072	8.38784e-05	0.000971378	down	Chr00	24700892	24703905	-	TRINITY_DN10148_c0_g2_i5	--	K14510 serine/threonine-protein kinase CTR1 [EC:2.7.11.1] | (RefSeq) serine/threonine-protein kinase EDR1-like isoform X1 (A)	RGS domain-containing serine/threonine-protein kinase A-like isoform X2 [Aegilops tauschii subsp. tauschii]	--	SubName: Full=Uncharacterized protein {ECO:0000313|EnsemblPlants:HORVU4Hr1G029350.4};	Tyrosine kinase specific for activated (GTP-bound) p21cdc42Hs	GO:0006355,regulation of transcription, DNA-templated	PAS fold
TRINITY_DN10149_c0_g2_i1.path2	0.69	0.91	0.71	2.49	2.5	1.82	39	64	41	139	176	124	2.491	1.317	1.10127e-05	0.000165687	up	1A	335893552	335905278	-	TRINITY_DN10149_c0_g2_i1	--	K01191 alpha-mannosidase [EC:3.2.1.24] | (RefSeq) LOC109775477; alpha-mannosidase-like (A)	alpha-mannosidase-like [Aegilops tauschii subsp. tauschii]	RecName: Full=Alpha-mannosidase {ECO:0000303|PubMed:4973951}; Short=JBM {ECO:0000303|PubMed:24295789}; Short=Jbalpha-man {ECO:0000303|PubMed:21924285}; EC=3.2.1.24 {ECO:0000269|PubMed:1156387, ECO:0000269|PubMed:12325362, ECO:0000269|PubMed:4973951, ECO:0000269|PubMed:5145}; Contains: RecName: Full=Alpha-mannosidase, heavy subunit {ECO:0000303|PubMed:24221485}; Contains: RecName: Full=Alpha-manno…	RecName: Full=Alpha-mannosidase {ECO:0000256|RuleBase:RU361199}; EC=3.2.1.- {ECO:0000256|RuleBase:RU361199};	Glycosyl hydrolase, family 38 - alpha-mannosidase	GO:0000326,protein storage vacuole; GO:0004559,alpha-mannosidase activity; GO:0030246,carbohydrate binding; GO:0046872,metal ion binding; GO:0006013,mannose metabolic process	--
TRINITY_DN101533_c0_g1_i1.path1	4.35	3.89	3.53	1.15	2.74	1.67	65	72	54	17	51	30	0.402	-1.315	0.000769866	0.00640059	down	3C	407207989	407208933	+	TRINITY_DN101533_c0_g1_i1	--	--	--	--	--	--	--	--
TRINITY_DN101549_c0_g1_i1.path1	2.23	2.07	2.18	0.45	0.27	1.3	20	23	20	4	3	14	0.258	-1.954	0.00371645	0.0231895	down	2C	173564187	173565293	-	TRINITY_DN101549_c0_g1_i1	--	--	--	--	--	--	--	--
TRINITY_DN101579_c0_g1_i1.path3	3.33	2.11	3.4	0	0.47	0.84	23	18	24	0	4	7	0.126	-2.984	9.9603e-05	0.00112407	down	3D	326608815	326609250	-	TRINITY_DN101579_c0_g1_i1	--	--	--	--	--	--	--	--
TRINITY_DN101594_c0_g1_i1.path1	14.01	15.79	13.69	7.83	10.43	5.82	96	134	96	53	89	48	0.47	-1.089	0.000409252	0.00376949	down	3C	380619628	380620060	-	TRINITY_DN101594_c0_g1_i1	--	--	--	--	--	--	--	--
TRINITY_DN10168_c0_g1_i3.path1	3.73	3.14	2.97	9.19	8.92	9.13	146	152	119	355	434	430	2.33	1.22	3.32087e-09	1.08297e-07	up	6A	240484686	240491243	-	TRINITY_DN10168_c0_g1_i3	--	K00876 uridine kinase [EC:2.7.1.48] | (RefSeq) LOC109766944; uridine-cytidine kinase C-like (A)	predicted protein [Hordeum vulgare subsp. vulgare]	RecName: Full=Uridine kinase-like protein 1, chloroplastic; Includes: RecName: Full=Uridine kinase; Short=UK; EC=2.7.1.48; Includes: RecName: Full=Putative uracil phosphoribosyltransferase; Short=UPRTase; EC=2.4.2.9; AltName: Full=UMP pyrophosphorylase; Flags: Precursor;	SubName: Full=Predicted protein {ECO:0000313|EMBL:BAJ98691.1, ECO:0000313|EnsemblPlants:HORVU6Hr1G069280.2};	Armadillo/beta-Catenin/plakoglobin	GO:0009507,chloroplast; GO:0005737,cytoplasm; GO:0005829,cytosol; GO:0005524,ATP binding; GO:0005525,GTP binding; GO:0004845,uracil phosphoribosyltransferase activity; GO:0004849,uridine kinase activity; GO:0044211,CTP salvage; GO:0006206,pyrimidine nucleobase metabolic process; GO:2000904,regulation of starch metabolic process; GO:0044206,UMP salvage	Phosphoribulokinase / Uridine kinase family
TRINITY_DN101704_c0_g1_i1.path1	0.58	1.29	1.85	4.27	4.21	3.99	4	11	13	29	36	33	2.804	1.488	0.00885919	0.0461625	up	6D	201910665	201911098	+	TRINITY_DN101704_c0_g1_i1	--	--	--	--	--	--	--	--
TRINITY_DN10173_c0_g1_i2.path1	3.18	3.57	4	9.05	7.14	11.08	171	238	220	481	478	718	2.117	1.082	2.95501e-07	6.48995e-06	up	4A	109812888	109819642	-	TRINITY_DN10173_c0_g1_i2	--	K13447 respiratory burst oxidase [EC:1.6.3.- 1.11.1.-] | (RefSeq) LOC109750361; respiratory burst oxidase homolog protein B-like (A)	respiratory burst oxidase homolog protein B-like [Aegilops tauschii subsp. tauschii]	RecName: Full=Respiratory burst oxidase homolog protein C; EC=1.11.1.-; EC=1.6.3.-; AltName: Full=NADPH oxidase RBOHC; AltName: Full=StRBOHC;	SubName: Full=Uncharacterized protein {ECO:0000313|EnsemblPlants:TRIAE_CS42_4BL_TGACv1_321503_AA1061470.2};	Ferric reductase, NADH/NADPH oxidase and related proteins	GO:0016021,integral component of membrane; GO:0005509,calcium ion binding; GO:0050664,oxidoreductase activity, acting on NAD(P)H, oxygen as acceptor; GO:0004601,peroxidase activity	Ferric reductase NAD binding domain
TRINITY_DN10177_c0_g1_i1.path1	1.09	1.59	1.9	4.43	2.38	5.68	33	60	59	133	90	208	2.263	1.178	0.000652382	0.00556288	up	7D	82516142	82522352	-	TRINITY_DN10177_c0_g1_i1	--	K12126 phytochrome-interacting factor 3 | (RefSeq) transcription factor PIF3 (A)	PREDICTED: transcription factor BIM2-like isoform X1 [Brachypodium distachyon]	RecName: Full=Transcription factor BIM2; AltName: Full=BES1-interacting Myc-like protein 2; AltName: Full=Basic helix-loop-helix protein 102; Short=AtbHLH102; Short=bHLH 102; AltName: Full=Transcription factor EN 125; AltName: Full=bHLH transcription factor bHLH102;	SubName: Full=Uncharacterized protein {ECO:0000313|EMBL:KQJ98764.1, ECO:0000313|EnsemblPlants:BRADI3G38970.1};	--	GO:0005634,nucleus; GO:0003700,DNA-binding transcription factor activity; GO:0046983,protein dimerization activity; GO:0043565,sequence-specific DNA binding; GO:0006351,transcription, DNA-templated	Helix-loop-helix DNA-binding domain
TRINITY_DN10177_c0_g1_i1.path2	1.14	1.32	1.75	3.86	2.1	4.33	35	50	55	117	80	160	2.031	1.022	0.00284039	0.0186905	up	5C	75434219	75439443	-	TRINITY_DN10177_c0_g1_i1	--	K16189 phytochrome-interacting factor 4 | (RefSeq) transcription factor PIF1-like (A)	PREDICTED: transcription factor BIM2-like isoform X1 [Brachypodium distachyon]	RecName: Full=Transcription factor BIM2; AltName: Full=BES1-interacting Myc-like protein 2; AltName: Full=Basic helix-loop-helix protein 102; Short=AtbHLH102; Short=bHLH 102; AltName: Full=Transcription factor EN 125; AltName: Full=bHLH transcription factor bHLH102;	SubName: Full=Uncharacterized protein {ECO:0000313|EMBL:KQJ98764.1, ECO:0000313|EnsemblPlants:BRADI3G38970.1};	--	GO:0005634,nucleus; GO:0003700,DNA-binding transcription factor activity; GO:0046983,protein dimerization activity; GO:0043565,sequence-specific DNA binding; GO:0006351,transcription, DNA-templated	Helix-loop-helix DNA-binding domain
TRINITY_DN101778_c0_g1_i1.path1	90.12	110.06	100.47	51.8	60.23	59.04	398	602	454	226	331	314	0.479	-1.062	9.93097e-09	2.9198e-07	down	2D	337035484	337035762	-	TRINITY_DN101778_c0_g1_i1	--	K22733 magnesium transporter | (RefSeq) uncharacterized protein LOC102612526 (A)	predicted protein, partial [Hordeum vulgare subsp. vulgare]	RecName: Full=Pentatricopeptide repeat-containing protein At3g57430, chloroplastic; AltName: Full=Protein ORGANELLE TRANSCRIPT PROCESSING 84 {ECO:0000303|PubMed:19934379}; Flags: Precursor;	SubName: Full=Uncharacterized protein {ECO:0000313|EnsemblPlants:HORVU0Hr1G001760.1};	FOG: PPR repeat	GO:0009507,chloroplast; GO:0004519,endonuclease activity; GO:0003723,RNA binding; GO:0008270,zinc ion binding; GO:0031425,chloroplast RNA processing; GO:0006397,mRNA processing; GO:0009451,RNA modification	--
TRINITY_DN101778_c0_g1_i1.path3	29.85	32.14	33.02	14.05	22.5	15.76	129	172	146	60	121	82	0.465	-1.103	5.49884e-05	0.000675848	down	2C	560174526	560174798	-	TRINITY_DN101778_c0_g1_i1	--	K22733 magnesium transporter | (RefSeq) uncharacterized protein LOC102612526 (A)	predicted protein, partial [Hordeum vulgare subsp. vulgare]	RecName: Full=Pentatricopeptide repeat-containing protein At3g57430, chloroplastic; AltName: Full=Protein ORGANELLE TRANSCRIPT PROCESSING 84 {ECO:0000303|PubMed:19934379}; Flags: Precursor;	SubName: Full=Uncharacterized protein {ECO:0000313|EnsemblPlants:HORVU0Hr1G001760.1};	FOG: PPR repeat	GO:0009507,chloroplast; GO:0004519,endonuclease activity; GO:0003723,RNA binding; GO:0008270,zinc ion binding; GO:0031425,chloroplast RNA processing; GO:0006397,mRNA processing; GO:0009451,RNA modification	PPR repeat
TRINITY_DN10178_c0_g2_i5.path1	2.23	2.1	1.54	0.68	0.97	0.98	89	104	63	27	48	47	0.378	-1.403	1.86643e-05	0.0002648	down	7A	431930287	431935632	+	TRINITY_DN10178_c0_g2_i5	--	--	--	--	--	--	--	--
TRINITY_DN10181_c0_g1_i4.path1	6.57	5.33	3.89	2.86	2.62	3.16	228	229	138	98	113	132	0.46	-1.119	7.96947e-06	0.000124615	down	1D	350539197	350547012	-	TRINITY_DN10181_c0_g1_i4	--	K04077 chaperonin GroEL | (RefSeq) LOC109765736; chaperonin CPN60-like 2, mitochondrial (A)	chaperonin CPN60-like 2, mitochondrial [Aegilops tauschii subsp. tauschii]	RecName: Full=Chaperonin CPN60-like 2, mitochondrial; AltName: Full=HSP60-like 2; Flags: Precursor;	SubName: Full=Uncharacterized protein {ECO:0000313|EnsemblPlants:TRIAE_CS42_1DL_TGACv1_063075_AA0223600.1};	Mitochondrial chaperonin, Cpn60/Hsp60p	GO:0005829,cytosol; GO:0005739,mitochondrion; GO:0005774,vacuolar membrane; GO:0005524,ATP binding; GO:0044183,protein binding involved in protein folding; GO:0051082,unfolded protein binding; GO:0006458,'de novo' protein folding; GO:0061077,chaperone-mediated protein folding; GO:0045041,protein import into mitochondrial intermembrane space; GO:0042026,protein refolding; GO:0046686,response to ca…	TCP-1/cpn60 chaperonin family
TRINITY_DN10181_c0_g1_i4.path2	13.85	12.22	9.92	4.92	3.98	4.96	487	532	357	171	174	210	0.324	-1.628	1.69225e-15	1.46553e-13	down	1A	365021647	365026894	-	TRINITY_DN10181_c0_g1_i4	--	--	--	--	--	--	--	--
TRINITY_DN10182_c0_g1_i7.path1	0.83	0.88	0.78	1.87	2.3	1.98	23	30	22	51	79	66	2.086	1.061	0.00487249	0.0287668	up	7C	93537262	93539089	-	TRINITY_DN10182_c0_g1_i7	--	--	putative F-box/LRR-repeat/kelch-repeat protein At1g11620 [Aegilops tauschii subsp. tauschii]	--	SubName: Full=Uncharacterized protein {ECO:0000313|EnsemblPlants:TRIAE_CS42_4BL_TGACv1_320801_AA1049090.1};	--	--	F-box domain
TRINITY_DN10185_c0_g1_i1.path1	0.95	0.79	1.11	5.63	5.19	5.73	32	33	38	187	217	232	4.888	2.289	5.36255e-16	4.92379e-14	up	7C	529885198	529888124	+	TRINITY_DN10185_c0_g1_i1	--	--	predicted protein [Hordeum vulgare subsp. vulgare]	RecName: Full=F-box protein At5g39450;	SubName: Full=Predicted protein {ECO:0000313|EMBL:BAK01799.1};	--	--	F-box domain
TRINITY_DN10185_c0_g1_i1.path2	0.15	0.17	0.26	1.66	1.51	2.35	5	7	9	55	63	95	7.976	2.996	1.52315e-09	5.28508e-08	up	7D	359097303	359100235	+	TRINITY_DN10185_c0_g1_i1	--	--	predicted protein [Hordeum vulgare subsp. vulgare]	RecName: Full=F-box protein At5g39450;	SubName: Full=Uncharacterized protein {ECO:0000313|EnsemblPlants:TRIAE_CS42_U_TGACv1_641214_AA2088520.1};	--	--	F-box domain
TRINITY_DN10185_c0_g1_i1.path3	0.42	0.41	0.38	2.65	2.96	3.58	14	17	13	88	124	145	6.423	2.683	3.07568e-13	1.92867e-11	up	7A	36308046	36310987	-	TRINITY_DN10185_c0_g1_i1	--	--	--	--	--	--	--	--
TRINITY_DN101871_c0_g1_i1.path1	0.12	0.09	0	14.09	5.36	28.19	1	1	0	121	58	295	186.484	7.543	1.32979e-11	6.52668e-10	up	6D	277862617	277863311	+	TRINITY_DN101871_c0_g1_i1	--	K14157 alpha-aminoadipic semialdehyde synthase [EC:1.5.1.8 1.5.1.9] | (RefSeq) alpha-aminoadipic semialdehyde synthase (A)	Alpha-aminoadipic semialdehyde synthase [Triticum urartu]	RecName: Full=Alpha-aminoadipic semialdehyde synthase; AltName: Full=cAt-LKR/SDH; Short=LKR/SDH; Includes: RecName: Full=Lysine ketoglutarate reductase; Short=LKR; EC=1.5.1.8; Includes: RecName: Full=Saccharopine dehydrogenase; EC=1.5.1.9; AltName: Full=cAt-SDH; Short=SDH;	SubName: Full=Alpha-aminoadipic semialdehyde synthase {ECO:0000313|EMBL:EMT26845.1, ECO:0000313|EnsemblPlants:EMT26845};	Lysine-ketoglutarate reductase/saccharopine dehydrogenase	GO:0005737,cytoplasm; GO:0047131,saccharopine dehydrogenase (NAD+, L-glutamate-forming) activity; GO:0047130,saccharopine dehydrogenase (NADP+, L-lysine-forming) activity; GO:0004753,saccharopine dehydrogenase activity; GO:0006091,generation of precursor metabolites and energy; GO:0033512,L-lysine catabolic process to acetyl-CoA via saccharopine; GO:0019878,lysine biosynthetic process via aminoad…	--
TRINITY_DN10191_c1_g1_i1.path1	117.65	94.25	76.06	25.02	32.19	64.05	514	510	340	108	175	337	0.35	-1.515	5.01359e-08	1.28193e-06	down	2C	211165728	211166003	+	TRINITY_DN10191_c1_g1_i1	--	--	--	--	--	--	--	--
TRINITY_DN101935_c0_g1_i1.path1	15.04	10.28	9.72	0.47	3.35	4.42	65	55	43	2	18	23	0.199	-2.328	5.24164e-06	8.585e-05	down	Chr00	61295261	61295533	+	TRINITY_DN101935_c0_g1_i1	--	--	--	--	--	--	--	--
TRINITY_DN10194_c2_g1_i1.path1	0	0	0	22.32	7.17	31.12	0	0	0	163	66	277	726.654	9.505	5.5317e-11	2.42398e-09	up	7C	555201107	555201573	+	TRINITY_DN10194_c2_g1_i1	--	--	--	--	--	--	--	--
TRINITY_DN101954_c0_g1_i1.path1	11.54	9.64	8.69	3.37	3.82	6.37	170	176	131	49	70	113	0.379	-1.398	6.81967e-07	1.39013e-05	down	6C	390099127	390100347	-	TRINITY_DN101954_c0_g1_i1	--	--	--	--	--	--	--	--
TRINITY_DN101979_c0_g1_i1.path1	11.98	7.05	12.55	1.21	2.61	3.7	70	51	75	7	19	26	0.199	-2.326	1.86823e-07	4.28977e-06	down	4D	338408428	338408796	+	TRINITY_DN101979_c0_g1_i1	--	--	--	--	--	--	--	--
TRINITY_DN10199_c0_g1_i1.path1	9.48	6.47	4.57	2.16	2.68	2.66	71	60	35	16	25	24	0.309	-1.692	5.35593e-05	0.000660836	down	7A	96077663	96078135	-	TRINITY_DN10199_c0_g1_i1	--	--	--	--	--	--	--	--
TRINITY_DN10200_c0_g1_i3.path1	72.27	65.8	66.38	34.11	39.54	40.35	2923	3296	2747	1363	1990	1965	0.468	-1.096	1.51164e-12	8.56196e-11	down	5A	484966112	484970862	+	TRINITY_DN10200_c0_g1_i3	--	K08193 MFS transporter, ACS family, solute carrier family 17 (sodium-dependent inorganic phosphate cotransporter), other | (RefSeq) probable anion transporter 4, chloroplastic (A)	PREDICTED: probable anion transporter 4, chloroplastic [Brachypodium distachyon]	RecName: Full=Probable anion transporter 4, chloroplastic; AltName: Full=Phosphate transporter 4;4; Flags: Precursor;	SubName: Full=Uncharacterized protein {ECO:0000313|EMBL:KQJ91627.1, ECO:0000313|EnsemblPlants:BRADI4G38740.1};	Permease of the major facilitator superfamily	GO:0009706,chloroplast inner membrane; GO:0016021,integral component of membrane; GO:0009536,plastid; GO:0005315,inorganic phosphate transmembrane transporter activity; GO:0015229,L-ascorbic acid transmembrane transporter activity; GO:0098656,anion transmembrane transport; GO:0010028,xanthophyll cycle	Major Facilitator Superfamily
TRINITY_DN102001_c0_g1_i1.path1	8.36	3.88	4.52	1.8	2.72	1.92	47	27	26	10	19	13	0.325	-1.621	0.0018693	0.0133022	down	7C	459764237	459764591	-	TRINITY_DN102001_c0_g1_i1	--	--	--	--	--	--	--	--
TRINITY_DN102054_c0_g1_i1.path1	508.54	329.43	252.71	142.33	197.67	184.74	2423	1944	1232	670	1172	1060	0.405	-1.304	1.78192e-08	4.97517e-07	down	5C	554835152	554835452	-	TRINITY_DN102054_c0_g1_i1	--	--	--	--	--	--	--	--
TRINITY_DN102073_c0_g1_i1.path2	10.05	10.45	16.24	8.21	4.04	7.22	52	67	86	42	26	45	0.439	-1.188	0.00197266	0.0139059	down	2D	432859890	432860216	-	TRINITY_DN102073_c0_g1_i1	--	K04733 interleukin-1 receptor-associated kinase 4 [EC:2.7.11.1] | (RefSeq) wall-associated receptor kinase 3-like (A)	Wall-associated receptor kinase 5 [Triticum urartu]	RecName: Full=Putative wall-associated receptor kinase-like 16; EC=2.7.11.-; Flags: Precursor;	SubName: Full=Wall-associated receptor kinase 5 {ECO:0000313|EMBL:EMS62262.1, ECO:0000313|EnsemblPlants:TRIUR3_34330-P1};	Serine/threonine protein kinase	GO:0016021,integral component of membrane; GO:0005886,plasma membrane; GO:0005524,ATP binding; GO:0004674,protein serine/threonine kinase activity; GO:0007166,cell surface receptor signaling pathway	Protein kinase domain
TRINITY_DN102073_c0_g1_i1.path3	2.32	3.12	4.72	0.39	0.16	0.16	12	20	25	2	1	1	0.056	-4.153	1.78676e-05	0.000254734	down	6A	13699357	13699683	+	TRINITY_DN102073_c0_g1_i1	--	K04733 interleukin-1 receptor-associated kinase 4 [EC:2.7.11.1] | (RefSeq) wall-associated receptor kinase 3-like (A)	Wall-associated receptor kinase 5 [Triticum urartu]	RecName: Full=Putative wall-associated receptor kinase-like 16; EC=2.7.11.-; Flags: Precursor;	SubName: Full=Wall-associated receptor kinase 5 {ECO:0000313|EMBL:EMS62262.1, ECO:0000313|EnsemblPlants:TRIUR3_34330-P1};	Serine/threonine protein kinase	GO:0016021,integral component of membrane; GO:0005886,plasma membrane; GO:0005524,ATP binding; GO:0004674,protein serine/threonine kinase activity; GO:0007166,cell surface receptor signaling pathway	Protein kinase domain
TRINITY_DN10208_c0_g1_i1.path2	23.3	19.34	24.15	11.98	12.44	12.59	644	662	683	327	428	419	0.464	-1.108	4.4201e-09	1.39602e-07	down	7C	678148678	678151892	+	TRINITY_DN10208_c0_g1_i1	--	K22857 EEF1A lysine methyltransferase 4 [EC:2.1.1.-] | (RefSeq) LOC109758059; methyltransferase-like protein 13 (A)	methyltransferase-like protein 13 [Aegilops tauschii subsp. tauschii]	RecName: Full=Probable thiol methyltransferase 2; EC=2.1.1.9; AltName: Full=Protein HARMLESS TO OZONE LAYER 3; Short=AtHOL3;	SubName: Full=Uncharacterized protein {ECO:0000313|EnsemblPlants:TRIAE_CS42_2BS_TGACv1_147278_AA0480950.1};	Predicted spermine/spermidine synthase	GO:0009507,chloroplast; GO:0009941,chloroplast envelope; GO:0018708,thiol S-methyltransferase activity	Methyltransferase domain
TRINITY_DN102080_c0_g1_i1.path1	7.8	5.7	4.36	0.56	2.54	1.39	42	38	24	3	17	9	0.217	-2.207	0.000107448	0.00119847	down	3A	356397258	356397597	+	TRINITY_DN102080_c0_g1_i1	--	K07198 5'-AMP-activated protein kinase, catalytic alpha subunit [EC:2.7.11.11] | (RefSeq) CBL-interacting protein kinase 5 (A)	predicted protein [Hordeum vulgare subsp. vulgare]	RecName: Full=CBL-interacting protein kinase 5; EC=2.7.11.1; AltName: Full=OsCIPK05;	SubName: Full=CIPK5 {ECO:0000313|EMBL:JAF49257.1};	Serine/threonine protein kinase	GO:0005829,cytosol; GO:0005524,ATP binding; GO:0004674,protein serine/threonine kinase activity; GO:0035556,intracellular signal transduction; GO:0018105,peptidyl-serine phosphorylation; GO:0018107,peptidyl-threonine phosphorylation	NAF domain
TRINITY_DN1021_c0_g2_i3.path1	7.99	8.6	9.89	41.67	22.82	37.65	90	120	114	464	320	511	3.226	1.69	2.70561e-11	1.2595e-09	up	1C	83313862	83314692	+	TRINITY_DN1021_c0_g2_i3	--	--	hypothetical protein TRIUR3_34300 [Triticum urartu]	--	SubName: Full=Uncharacterized protein {ECO:0000313|EnsemblPlants:TRIAE_CS42_1AL_TGACv1_000743_AA0018220.1};	--	GO:0046872,metal ion binding; GO:0030001,metal ion transport	Heavy-metal-associated domain
TRINITY_DN102137_c0_g1_i1.path1	41.68	30.21	31.61	20.53	17.36	19.28	411	369	319	200	213	229	0.463	-1.11	2.35558e-07	5.27798e-06	down	4A	399993933	399994719	+	TRINITY_DN102137_c0_g1_i1	--	--	--	--	--	--	--	--
TRINITY_DN102161_c0_g1_i1.path1	0.87	2.2	2.78	10.78	7.57	10.18	7	22	23	86	76	99	4.064	2.023	1.44397e-06	2.72271e-05	up	5C	130295893	130297703	-	TRINITY_DN102161_c0_g1_i1	--	--	--	--	--	--	--	--
TRINITY_DN102234_c0_g1_i1.path1	9.65	4.02	6.39	3.15	1.13	3.49	62	32	42	20	9	27	0.32	-1.646	0.000983394	0.00783237	down	4C	280262033	280269392	+	TRINITY_DN102234_c0_g1_i1	--	--	--	--	--	--	--	--
TRINITY_DN10224_c0_g1_i1.path1	0.24	0.19	0.28	1.1	2.43	1.02	5	5	6	23	64	26	5.527	2.466	0.000125802	0.00137322	up	5A	45307309	45308751	+	TRINITY_DN10224_c0_g1_i1	--	--	PREDICTED: outer envelope pore protein 16-2, chloroplastic isoform X2 [Brachypodium distachyon]	RecName: Full=Outer envelope pore protein 16-2, chloroplastic; AltName: Full=Chloroplastic outer envelope pore protein of 16 kDa 2; Short=AtOEP16-2; Short=OEP16-2; AltName: Full=Outer plastid envelope protein 16-S; Short=AtOEP16-S; Short=Seeds outer plastid envelope protein 16;	SubName: Full=Uncharacterized protein {ECO:0000313|EMBL:KQK22019.1, ECO:0000313|EnsemblPlants:BRADI1G64590.1};	--	GO:0031359,integral component of chloroplast outer membrane; GO:0031305,integral component of mitochondrial inner membrane; GO:0005744,TIM23 mitochondrial import inner membrane translocase complex; GO:0009527,plastid outer membrane; GO:0046930,pore complex; GO:0015171,amino acid transmembrane transporter activity; GO:0015288,porin activity; GO:0015266,NA; GO:0042803,protein homodimerization activ…	--
TRINITY_DN102287_c0_g1_i1.path1	23.69	14.35	12.95	5.99	8.39	11.94	84	63	47	21	37	51	0.433	-1.206	0.00183384	0.0130861	down	4C	527262000	527262223	-	TRINITY_DN102287_c0_g1_i1	--	--	--	--	--	--	--	--
TRINITY_DN10230_c0_g1_i5.path1	1.66	2.25	2.31	4.5	5.82	4.87	35	59	50	94	153	124	2.056	1.04	0.000614829	0.00530135	up	5D	185778629	185782295	+	TRINITY_DN10230_c0_g1_i5	--	K11827 AP-2 complex subunit sigma-1 | (RefSeq) AP-2 complex subunit sigma (A)	PREDICTED: AP-2 complex subunit sigma [Fragaria vesca subsp. vesca]	RecName: Full=AP-2 complex subunit sigma; AltName: Full=Clathrin assembly protein 2 sigma small chain; AltName: Full=Clathrin coat assembly protein AP17; AltName: Full=Clathrin coat-associated protein AP17; AltName: Full=Plasma membrane adaptor AP-2 17 kDa protein; AltName: Full=Sigma2-adaptin;	RecName: Full=AP complex subunit sigma {ECO:0000256|PIRNR:PIRNR015588};	Clathrin adaptor complex, small subunit	GO:0005905,clathrin-coated pit; GO:0005886,plasma membrane; GO:0008565,protein transporter activity; GO:0006897,endocytosis	Clathrin adaptor complex small chain
TRINITY_DN10230_c0_g1_i5.path2	1.51	1.91	2.31	5.32	4.79	4.79	32	50	50	111	126	122	2.181	1.125	0.000260097	0.00255348	up	5A	201820055	201823726	+	TRINITY_DN10230_c0_g1_i5	--	K11827 AP-2 complex subunit sigma-1 | (RefSeq) AP-2 complex subunit sigma (A)	PREDICTED: AP-2 complex subunit sigma [Fragaria vesca subsp. vesca]	RecName: Full=AP-2 complex subunit sigma; AltName: Full=Clathrin assembly protein 2 sigma small chain; AltName: Full=Clathrin coat assembly protein AP17; AltName: Full=Clathrin coat-associated protein AP17; AltName: Full=Plasma membrane adaptor AP-2 17 kDa protein; AltName: Full=Sigma2-adaptin;	RecName: Full=AP complex subunit sigma {ECO:0000256|PIRNR:PIRNR015588};	Clathrin adaptor complex, small subunit	GO:0005905,clathrin-coated pit; GO:0005886,plasma membrane; GO:0008565,protein transporter activity; GO:0006897,endocytosis	Clathrin adaptor complex small chain
TRINITY_DN10237_c0_g2_i3.path2	0.81	1.16	1.44	2.56	3.79	3.55	26	46	47	81	151	137	2.439	1.286	9.61471e-05	0.00109237	up	1D	212312690	212317017	-	TRINITY_DN10237_c0_g2_i3	--	K13157 U11/U12 small nuclear ribonucleoprotein 65 kDa protein | (RefSeq) LOC109760500; U11/U12 small nuclear ribonucleoprotein 65 kDa protein-like (A)	U11/U12 small nuclear ribonucleoprotein 65 kDa protein-like [Aegilops tauschii subsp. tauschii]	RecName: Full=U11/U12 small nuclear ribonucleoprotein 65 kDa protein; Short=U11/U12 snRNP 65 kDa protein; Short=U11/U12-65K;	SubName: Full=Uncharacterized protein {ECO:0000313|EnsemblPlants:TRIAE_CS42_1BL_TGACv1_030738_AA0099580.1};	Spliceosomal protein snRNP-U1A/U2B	GO:0005634,nucleus; GO:0005689,U12-type spliceosomal complex; GO:0097157,pre-mRNA intronic binding; GO:0030626,U12 snRNA binding; GO:0010229,inflorescence development; GO:0000398,mRNA splicing, via spliceosome	RNA recognition motif. (a.k.a. RRM, RBD, or RNP domain)
TRINITY_DN10240_c0_g1_i12.path2	1.17	1.47	0.63	0.31	0.48	0.61	49	76	27	13	25	31	0.366	-1.451	0.00097759	0.00779292	down	3A	157548288	157551831	-	TRINITY_DN10240_c0_g1_i12	--	--	--	--	--	--	--	--
TRINITY_DN10243_c0_g1_i6.path1	0.11	0.49	0.17	58.58	41.76	42.2	3	17	5	1626	1460	1428	150.447	7.233	1.62673e-87	1.48803e-83	up	5A	12965551	12968316	-	TRINITY_DN10243_c0_g1_i6	--	K00826 branched-chain amino acid aminotransferase [EC:2.6.1.42] | (RefSeq) branched-chain-amino-acid aminotransferase 3, chloroplastic (A)	PREDICTED: branched-chain-amino-acid aminotransferase 2, chloroplastic isoform X1 [Brachypodium distachyon]	RecName: Full=Branched-chain-amino-acid aminotransferase 3, chloroplastic {ECO:0000303|PubMed:12068099}; Short=Atbcat-3; EC=2.6.1.42; EC=2.6.1.88; Flags: Precursor;	RecName: Full=Branched-chain-amino-acid aminotransferase {ECO:0000256|RuleBase:RU004517}; EC=2.6.1.42 {ECO:0000256|RuleBase:RU004517};	Branched chain aminotransferase BCAT1, pyridoxal phosphate enzymes type IV superfamily	GO:0009507,chloroplast; GO:0009570,chloroplast stroma; GO:0052656,L-isoleucine transaminase activity; GO:0052654,L-leucine transaminase activity; GO:0052655,L-valine transaminase activity; GO:0009097,isoleucine biosynthetic process; GO:0009098,leucine biosynthetic process; GO:0009099,valine biosynthetic process	Amino-transferase class IV
TRINITY_DN102435_c0_g1_i1.path1	0.15	0.48	1.3	6.3	4.53	4.06	1	4	9	42	38	33	6.484	2.697	4.60506e-05	0.000580323	up	3D	373330833	373331258	+	TRINITY_DN102435_c0_g1_i1	--	K13457 disease resistance protein RPM1 | (RefSeq) disease resistance protein RPM1-like (A)	unnamed protein product [Triticum aestivum]	RecName: Full=Disease resistance protein RPM1; AltName: Full=Resistance to Pseudomonas syringae protein 3;	SubName: Full=Uncharacterized protein {ECO:0000313|EnsemblPlants:TRIUR3_20535-P1};	Apoptotic ATPase	GO:0012505,endomembrane system; GO:0019897,extrinsic component of plasma membrane; GO:0005886,plasma membrane; GO:0043531,ADP binding; GO:0005524,ATP binding; GO:0000166,nucleotide binding; GO:0009626,plant-type hypersensitive response; GO:0007165,signal transduction	Leucine Rich repeats (2 copies)
TRINITY_DN10244_c0_g1_i2.path1	0.06	0	0.12	2.17	0.05	4.02	1	0	2	35	1	79	28.067	4.811	0.00690474	0.0379777	up	3C	583823774	583824805	+	TRINITY_DN10244_c0_g1_i2	--	K19038 E3 ubiquitin-protein ligase ATL41 [EC:2.3.2.27] | (RefSeq) RING-H2 finger protein ATL44-like (A)	unnamed protein product [Triticum aestivum]	RecName: Full=E3 ubiquitin-protein ligase ATL59; EC=2.3.2.27 {ECO:0000269|PubMed:15644464, ECO:0000269|PubMed:16339806}; AltName: Full=RING-H2 finger protein ATL59; AltName: Full=RING-type E3 ubiquitin transferase ATL59 {ECO:0000305};	SubName: Full=Uncharacterized protein {ECO:0000313|EnsemblPlants:HORVU3Hr1G087720.1};	FOG: Predicted E3 ubiquitin ligase	GO:0016021,integral component of membrane; GO:0046872,metal ion binding; GO:0004842,ubiquitin-protein transferase activity; GO:0016567,protein ubiquitination	Ring finger domain
TRINITY_DN102490_c0_g1_i1.path1	9.83	12.31	7.64	28.62	28.53	20.65	49	76	39	141	177	124	2.215	1.148	0.000128672	0.00140079	up	7D	434001030	434001430	+	TRINITY_DN102490_c0_g1_i1	--	--	PREDICTED: uncharacterized protein LOC4341964 isoform X2 [Oryza sativa Japonica Group]	--	SubName: Full=Predicted protein {ECO:0000313|EnsemblPlants:HORVU7Hr1G097200.5};	--	GO:0016020,membrane; GO:0008375,acetylglucosaminyltransferase activity	--
TRINITY_DN10252_c0_g1_i3.path1	10.74	14	9.03	31.33	28.97	21.32	179	289	154	516	601	428	2.056	1.04	6.4732e-06	0.000103542	up	1D	435537133	435539615	-	TRINITY_DN10252_c0_g1_i3	--	K00861 riboflavin kinase [EC:2.7.1.26] | (RefSeq) uncharacterized protein LOC112289639 (A)	uncharacterized protein LOC109775689 [Aegilops tauschii subsp. tauschii]	--	SubName: Full=Uncharacterized protein {ECO:0000313|EnsemblPlants:TRIAE_CS42_4DL_TGACv1_342473_AA1114490.1};	--	GO:0009570,chloroplast stroma; GO:0009505,plant-type cell wall	--
TRINITY_DN10252_c0_g1_i3.path2	6.97	10.04	5.46	22.85	23.6	18.45	116	207	93	376	489	370	2.456	1.296	8.04606e-08	1.98317e-06	up	5A	15293328	15295809	+	TRINITY_DN10252_c0_g1_i3	--	K00861 riboflavin kinase [EC:2.7.1.26] | (RefSeq) uncharacterized protein LOC112289639 (A)	uncharacterized protein LOC109775689 [Aegilops tauschii subsp. tauschii]	--	SubName: Full=Uncharacterized protein {ECO:0000313|EnsemblPlants:TRIAE_CS42_4DL_TGACv1_342473_AA1114490.1};	--	GO:0009570,chloroplast stroma; GO:0009505,plant-type cell wall	--
TRINITY_DN102547_c0_g1_i1.path1	56.73	42.23	29.34	24.05	27.53	15.75	308	284	163	129	186	103	0.447	-1.163	5.20255e-05	0.000644301	down	1C	136797654	136797996	-	TRINITY_DN102547_c0_g1_i1	--	--	--	--	--	--	--	--
TRINITY_DN102558_c0_g1_i1.path1	1.4	1.89	2.74	7.26	9.4	9.2	9	15	18	46	75	71	3.596	1.847	2.7162e-05	0.000367546	up	3D	349211591	349211995	+	TRINITY_DN102558_c0_g1_i1	--	--	--	--	--	--	--	--
TRINITY_DN10258_c0_g1_i1.path1	12.6	20.24	12.69	36.23	44.14	52.32	518	1031	534	1472	2259	2591	2.458	1.297	5.11929e-11	2.26223e-09	up	1D	354107620	354113571	-	TRINITY_DN10258_c0_g1_i1	--	K01148 poly(A)-specific ribonuclease [EC:3.1.13.4] | (RefSeq) uncharacterized protein LOC100193495 (A)	CRM-domain containing factor CFM3, chloroplastic/mitochondrial [Aegilops tauschii subsp. tauschii]	RecName: Full=CRM-domain containing factor CFM3, chloroplastic/mitochondrial {ECO:0000305}; AltName: Full=Protein CRM FAMILY MEMBER 3 {ECO:0000303|PubMed:18799595}; Short=ZmCFM3 {ECO:0000303|PubMed:18799595}; Flags: Precursor;	SubName: Full=Uncharacterized protein {ECO:0000313|EnsemblPlants:TRIAE_CS42_1BL_TGACv1_031808_AA0120970.1};	Poly(A)-specific exoribonuclease PARN	GO:0009507,chloroplast; GO:0009570,chloroplast stroma; GO:0030529,NA; GO:0005739,mitochondrion; GO:0003723,RNA binding; GO:0000373,Group II intron splicing; GO:0006397,mRNA processing	CRS1 / YhbY (CRM) domain
TRINITY_DN10259_c0_g1_i2.path1	58.37	65.62	92.67	38.87	37.65	44.41	1409	1962	2289	927	1131	1291	0.465	-1.105	5.32002e-08	1.35319e-06	down	6A	431232749	431236540	-	TRINITY_DN10259_c0_g1_i2	--	K13811 3'-phosphoadenosine 5'-phosphosulfate synthase [EC:2.7.7.4 2.7.1.25] | (RefSeq) LOC109732641; ATP sulfurylase 2-like (A)	predicted protein [Hordeum vulgare subsp. vulgare]	RecName: Full=ATP sulfurylase 2; EC=2.7.7.4; Flags: Precursor;	SubName: Full=Predicted protein {ECO:0000313|EMBL:BAJ87231.1};	ATP sulfurylase (sulfate adenylyltransferase)	GO:0009507,chloroplast; GO:0009570,chloroplast stroma; GO:0005829,cytosol; GO:0004020,adenylylsulfate kinase activity; GO:0005524,ATP binding; GO:0004781,sulfate adenylyltransferase (ATP) activity; GO:0009970,cellular response to sulfate starvation; GO:0070814,hydrogen sulfide biosynthetic process; GO:0000103,sulfate assimilation	ATP-sulfurylase
TRINITY_DN102606_c0_g1_i1.path1	0	0	0	7.22	5.03	8.53	0	0	0	41	36	59	195.545	7.611	2.7322e-09	9.05933e-08	up	4A	401885084	401885446	-	TRINITY_DN102606_c0_g1_i1	--	--	--	--	--	--	--	--
TRINITY_DN102668_c0_g1_i1.path1	21.28	13.7	10.14	3.14	8.44	7.49	158	126	77	23	78	67	0.358	-1.484	5.47086e-05	0.000672861	down	6A	85151628	85152096	-	TRINITY_DN102668_c0_g1_i1	--	--	--	--	--	--	--	--
TRINITY_DN102675_c0_g1_i1.path2	0.33	0.62	0.43	3.31	2.01	1.72	3	7	4	30	23	19	4.314	2.109	0.00269884	0.0179202	up	7D	56978560	56979139	+	TRINITY_DN102675_c0_g1_i1	--	--	--	--	--	--	--	--
TRINITY_DN102683_c0_g1_i1.path2	3.91	7.48	8.85	27.29	20.67	28.88	19	45	44	131	125	169	3.168	1.663	6.12357e-07	1.25876e-05	up	4D	200716135	200716441	-	TRINITY_DN102683_c0_g1_i1	--	--	--	--	--	--	--	--
TRINITY_DN10270_c0_g1_i5.path1	0.43	0.55	0.51	3.97	3.8	2.9	14	22	17	127	153	113	6.025	2.591	5.22105e-13	3.14721e-11	up	6A	328700354	328702397	+	TRINITY_DN10270_c0_g1_i5	--	K04422 mitogen-activated protein kinase kinase kinase 13 [EC:2.7.11.25] | (RefSeq) serine/threonine-protein kinase EDR1 isoform X1 (A)	PREDICTED: leucine-rich repeat extensin-like protein 1 [Brachypodium distachyon]	--	SubName: Full=Uncharacterized protein {ECO:0000313|EMBL:KQK01288.1, ECO:0000313|EnsemblPlants:BRADI3G54940.1};	--	--	PB1 domain
TRINITY_DN10270_c0_g1_i5.path2	0.99	1.69	1.63	4.12	3.14	5.29	32	68	54	132	127	207	2.432	1.282	2.99874e-05	0.000400017	up	6D	289053561	289055611	+	TRINITY_DN10270_c0_g1_i5	--	K04422 mitogen-activated protein kinase kinase kinase 13 [EC:2.7.11.25] | (RefSeq) serine/threonine-protein kinase EDR1 isoform X1 (A)	PREDICTED: leucine-rich repeat extensin-like protein 1 [Brachypodium distachyon]	--	SubName: Full=Uncharacterized protein {ECO:0000313|EMBL:KQK01288.1, ECO:0000313|EnsemblPlants:BRADI3G54940.1};	--	--	PB1 domain
TRINITY_DN102700_c0_g1_i1.path1	0.42	0.57	1.1	2.84	4.5	7.79	3	5	8	20	40	67	6.047	2.596	3.86009e-05	0.000497336	up	3D	341994045	341994495	-	TRINITY_DN102700_c0_g1_i1	--	--	--	--	--	--	--	--
TRINITY_DN102711_c0_g1_i1.path1	21.76	17.36	19.98	3.98	10.53	7.18	83	82	78	15	50	33	0.311	-1.683	8.23497e-06	0.000127973	down	4C	75924520	75924760	+	TRINITY_DN102711_c0_g1_i1	--	--	--	--	--	--	--	--
TRINITY_DN1028_c0_g1_i3.path1	43.04	43.03	48.75	26.34	22.74	24.07	1133	1403	1313	685	745	763	0.455	-1.136	4.37838e-11	1.95967e-09	down	7C	24833465	24838142	-	TRINITY_DN1028_c0_g1_i3	--	K12448 UDP-arabinose 4-epimerase [EC:5.1.3.5] | (RefSeq) probable UDP-arabinose 4-epimerase 1 (A)	metal tolerance protein 4 [Sorghum bicolor]	RecName: Full=Metal tolerance protein 4; Short=OsMTP4;	SubName: Full=Uncharacterized protein {ECO:0000313|EMBL:EER92593.1};	Mitochondrial Fe2+ transporter MMT1 and related transporters (cation diffusion facilitator superfamily)	GO:0016021,integral component of membrane; GO:0005774,vacuolar membrane; GO:0008324,cation transmembrane transporter activity	Cation efflux family
TRINITY_DN10280_c0_g1_i1.path1	0	0.52	0	21.99	4.11	23.96	0	7	0	238	56	316	81.932	6.356	0.000105499	0.00117867	up	2D	331202927	331203815	-	TRINITY_DN10280_c0_g1_i1	--	K21407 adipocyte plasma membrane-associated protein | (RefSeq) LOC109787019; protein STRICTOSIDINE SYNTHASE-LIKE 4-like (A)	predicted protein, partial [Hordeum vulgare subsp. vulgare]	RecName: Full=Protein STRICTOSIDINE SYNTHASE-LIKE 10 {ECO:0000303|PubMed:10777701}; Short=AtSSL10 {ECO:0000303|PubMed:10777701}; AltName: Full=Strictosidine synthase 8; Short=AtSS8; Flags: Precursor;	SubName: Full=Predicted protein {ECO:0000313|EMBL:BAJ95754.1}; Flags: Fragment;	Predicted alkaloid synthase/Surface mucin Hemomucin	GO:0005783,endoplasmic reticulum; GO:0016020,membrane; GO:0009505,plant-type cell wall; GO:0005886,plasma membrane; GO:0009506,plasmodesma; GO:0005773,vacuole; GO:0016788,hydrolase activity, acting on ester bonds; GO:0009058,biosynthetic process	Strictosidine synthase
TRINITY_DN10280_c0_g1_i1.path2	0.09	0.37	0.27	9.07	2.38	6.9	1	5	3	97	32	90	20.424	4.352	1.94427e-10	7.7791e-09	up	6A	367679728	367680623	-	TRINITY_DN10280_c0_g1_i1	--	K21407 adipocyte plasma membrane-associated protein | (RefSeq) LOC109787019; protein STRICTOSIDINE SYNTHASE-LIKE 4-like (A)	predicted protein, partial [Hordeum vulgare subsp. vulgare]	RecName: Full=Protein STRICTOSIDINE SYNTHASE-LIKE 10 {ECO:0000303|PubMed:10777701}; Short=AtSSL10 {ECO:0000303|PubMed:10777701}; AltName: Full=Strictosidine synthase 8; Short=AtSS8; Flags: Precursor;	SubName: Full=Predicted protein {ECO:0000313|EMBL:BAJ95754.1}; Flags: Fragment;	Predicted alkaloid synthase/Surface mucin Hemomucin	GO:0005783,endoplasmic reticulum; GO:0016020,membrane; GO:0009505,plant-type cell wall; GO:0005886,plasma membrane; GO:0009506,plasmodesma; GO:0005773,vacuole; GO:0016788,hydrolase activity, acting on ester bonds; GO:0009058,biosynthetic process	Strictosidine synthase
TRINITY_DN102800_c0_g1_i1.path2	1.49	1.2	1.76	0.32	0.44	0.65	19	19	23	4	7	10	0.265	-1.914	0.0028988	0.0190065	down	1A	234042209	234043014	+	TRINITY_DN102800_c0_g1_i1	--	K04733 interleukin-1 receptor-associated kinase 4 [EC:2.7.11.1] | (RefSeq) probable receptor-like protein kinase At1g33260 (A)	probable receptor-like protein kinase At4g10390 [Aegilops tauschii subsp. tauschii]	RecName: Full=Probable receptor-like protein kinase At4g10390; EC=2.7.11.1;	SubName: Full=Uncharacterized protein {ECO:0000313|EnsemblPlants:TRIAE_CS42_1BL_TGACv1_030840_AA0102030.1};	Serine/threonine protein kinase	GO:0005524,ATP binding; GO:0004674,protein serine/threonine kinase activity; GO:0009611,response to wounding	--
TRINITY_DN10281_c0_g1_i1.path1	8.33	8.04	8.14	28.95	22.55	21.49	46	55	46	158	155	143	2.511	1.328	4.21111e-06	7.04699e-05	up	5C	592321603	592321951	-	TRINITY_DN10281_c0_g1_i1	--	K13899 cystatin-C | (RefSeq) LOC109743164; cysteine proteinase inhibitor 8-like (A)	cystatin precursor [Dactylis glomerata]	RecName: Full=Cysteine proteinase inhibitor 8; AltName: Full=Oryzacystatin VIII; Short=OC-VIII; AltName: Full=Oryzacystatin-8; Flags: Precursor;	RecName: Full=Cysteine proteinase inhibitor {ECO:0000256|RuleBase:RU362130};	--	GO:0005576,extracellular region; GO:0004869,cysteine-type endopeptidase inhibitor activity; GO:0002020,protease binding; GO:0006952,defense response; GO:2000117,negative regulation of cysteine-type endopeptidase activity	Aspartic acid proteinase inhibitor
TRINITY_DN102836_c0_g1_i1.path1	77.64	62.52	76.68	26.81	43.56	50.94	381	380	385	130	266	301	0.467	-1.1	4.33621e-06	7.24308e-05	down	3D	312969856	312970165	-	TRINITY_DN102836_c0_g1_i1	--	--	--	--	--	--	--	--
TRINITY_DN102857_c0_g1_i1.path1	0	0.38	0.12	1.93	1.05	1.78	0	4	1	16	11	18	7.656	2.937	0.00433782	0.0262196	up	4A	225088445	225088975	-	TRINITY_DN102857_c0_g1_i1	--	--	--	--	--	--	--	--
TRINITY_DN102878_c0_g1_i1.path1	13.3	13.53	9.25	3.62	5.65	6.37	104	131	74	28	55	60	0.367	-1.448	4.89251e-06	8.06371e-05	down	4D	413984893	413985486	-	TRINITY_DN102878_c0_g1_i1	--	--	hypothetical protein PAHAL_I03732 [Panicum hallii]	--	--	--	--	--
TRINITY_DN1029_c0_g1_i2.path1	0.19	0	0.14	1.64	1.95	1.19	4	0	3	34	51	30	12.774	3.675	1.52123e-06	2.85441e-05	up	6D	224868738	224870063	+	TRINITY_DN1029_c0_g1_i2	--	--	--	--	--	--	--	--
TRINITY_DN102910_c0_g1_i1.path1	1.46	3.35	2.63	7.94	5.67	6.88	13	37	24	70	63	74	2.309	1.207	0.00257934	0.0172931	up	1A	380391795	380392358	+	TRINITY_DN102910_c0_g1_i1	--	--	--	--	--	--	--	--
TRINITY_DN102968_c0_g1_i1.path1	0	0.14	0.5	10.4	11.14	14.93	0	1	3	60	81	105	48.387	5.597	6.79106e-12	3.48257e-10	up	6C	142854489	142854857	-	TRINITY_DN102968_c0_g1_i1	--	K03006 DNA-directed RNA polymerase II subunit RPB1 [EC:2.7.7.6] | (RefSeq) LOW QUALITY PROTEIN: DNA-directed RNA polymerase II subunit 1-like (A)	uncharacterized protein LOC111776361 [Cucurbita pepo subsp. pepo]	RecName: Full=Retrovirus-related Pol polyprotein from transposon TNT 1-94; Includes: RecName: Full=Protease; EC=3.4.23.-; Includes: RecName: Full=Reverse transcriptase; EC=2.7.7.49; Includes: RecName: Full=Endonuclease;	SubName: Full=Uncharacterized protein {ECO:0000313|EnsemblPlants:TRIAE_CS42_5BL_TGACv1_404276_AA1293550.1};	FOG: Transposon-encoded proteins with TYA, reverse transcriptase, integrase domains in various combinations	GO:0004190,aspartic-type endopeptidase activity; GO:0004519,endonuclease activity; GO:0003676,nucleic acid binding; GO:0003964,RNA-directed DNA polymerase activity; GO:0008270,zinc ion binding; GO:0015074,DNA integration	--
TRINITY_DN10298_c0_g2_i1.path1	0.77	1.19	1.16	3.62	2.76	2.79	11	21	17	51	49	48	2.464	1.301	0.00358636	0.0225392	up	4A	277489150	277490144	+	TRINITY_DN10298_c0_g2_i1	--	--	--	--	--	--	--	--
TRINITY_DN102996_c0_g1_i1.path1	98.91	65.84	83.14	45.35	31.55	25.92	393	324	338	178	156	124	0.349	-1.521	8.0932e-09	2.43025e-07	down	7D	88573052	88573302	+	TRINITY_DN102996_c0_g1_i1	--	--	--	--	--	--	--	--
TRINITY_DN10302_c0_g1_i5.path1	4.8	4.82	4	2.07	2.11	2.55	300	373	256	128	164	192	0.415	-1.267	4.71483e-10	1.77483e-08	down	1A	55549917	55555843	+	TRINITY_DN10302_c0_g1_i5	--	--	--	--	--	--	--	--
TRINITY_DN103031_c0_g1_i1.path1	1.01	1.64	2.31	10.94	8.82	5.19	6	12	14	64	65	37	4.25	2.087	4.48859e-05	0.000568288	up	5C	433901111	433903951	-	TRINITY_DN103031_c0_g1_i1	--	--	--	--	--	--	--	--
TRINITY_DN103040_c0_g1_i1.path1	0.22	0.53	0.42	107.67	57.22	80.4	1	3	2	490	328	446	173.405	7.438	1.30195e-30	4.31111e-28	up	6D	277866058	277866348	+	TRINITY_DN103040_c0_g1_i1	--	K14157 alpha-aminoadipic semialdehyde synthase [EC:1.5.1.8 1.5.1.9] | (RefSeq) LOC109771574; alpha-aminoadipic semialdehyde synthase isoform X1 (A)	saccharopine dehydrogenase-like protein [Hordeum vulgare]	RecName: Full=Alpha-aminoadipic semialdehyde synthase; AltName: Full=cAt-LKR/SDH; Short=LKR/SDH; Includes: RecName: Full=Lysine ketoglutarate reductase; Short=LKR; EC=1.5.1.8; Includes: RecName: Full=Saccharopine dehydrogenase; EC=1.5.1.9; AltName: Full=cAt-SDH; Short=SDH;	SubName: Full=Uncharacterized protein {ECO:0000313|EnsemblPlants:HORVU6Hr1G083050.27};	Lysine-ketoglutarate reductase/saccharopine dehydrogenase	GO:0005737,cytoplasm; GO:0047131,saccharopine dehydrogenase (NAD+, L-glutamate-forming) activity; GO:0047130,saccharopine dehydrogenase (NADP+, L-lysine-forming) activity; GO:0004753,saccharopine dehydrogenase activity; GO:0006091,generation of precursor metabolites and energy; GO:0033512,L-lysine catabolic process to acetyl-CoA via saccharopine; GO:0019878,lysine biosynthetic process via aminoad…	Saccharopine dehydrogenase C-terminal domain
TRINITY_DN103056_c0_g1_i1.path2	14.77	18.11	14.7	9.13	10.11	8.4	54	82	55	33	46	37	0.491	-1.027	0.00276824	0.0183063	down	4A	340861338	340861568	-	TRINITY_DN103056_c0_g1_i1	--	--	predicted protein [Hordeum vulgare subsp. vulgare]	RecName: Full=TLC domain-containing protein At5g14285 {ECO:0000305};	SubName: Full=Predicted protein {ECO:0000313|EMBL:BAJ84855.1, ECO:0000313|EnsemblPlants:HORVU7Hr1G091060.1};	--	GO:0016021,integral component of membrane	--
TRINITY_DN10306_c0_g2_i1.path1	0	0.17	0.1	0.96	1.02	1.14	0	2	1	9	12	13	9.266	3.212	0.00815508	0.0432697	up	4D	256234840	256238360	+	TRINITY_DN10306_c0_g2_i1	--	--	--	--	--	--	--	--
TRINITY_DN103086_c0_g1_i1.path2	5.85	5.69	6.31	15.64	12.54	18.57	39	47	43	103	104	149	2.191	1.131	0.000206355	0.00209484	up	2A	168008023	168008443	-	TRINITY_DN103086_c0_g1_i1	--	--	--	--	--	--	--	--
TRINITY_DN103112_c0_g1_i1.path1	148.91	169.47	150.37	47.59	45.5	70.95	1023	1442	1057	323	389	587	0.292	-1.774	6.65989e-22	1.06411e-19	down	1C	428064629	428065062	-	TRINITY_DN103112_c0_g1_i1	--	K15406 wax-ester synthase / diacylglycerol O-acyltransferase [EC:2.3.1.75 2.3.1.20] | (RefSeq) O-acyltransferase WSD1 (A)	O-acyltransferase WSD1-like isoform X2 [Aegilops tauschii subsp. tauschii]	RecName: Full=O-acyltransferase WSD1; AltName: Full=Diacylglycerol O-acyltransferase; Short=DGAT; EC=2.3.1.20; AltName: Full=Long-chain-alcohol O-fatty-acyltransferase; EC=2.3.1.75; AltName: Full=Wax synthase; Short=WS;	SubName: Full=Uncharacterized protein {ECO:0000313|EnsemblPlants:TRIAE_CS42_3AS_TGACv1_210771_AA0678590.4};	--	GO:0005783,endoplasmic reticulum; GO:0005789,endoplasmic reticulum membrane; GO:0016021,integral component of membrane; GO:0005886,plasma membrane; GO:0102966,arachidoyl-CoA:1-dodecanol O-acyltransferase activity; GO:0004144,diacylglycerol O-acyltransferase activity; GO:0047196,long-chain-alcohol O-fatty-acyltransferase activity; GO:0103095,wax ester synthase activity; GO:0019432,triglyceride bio…	Wax ester synthase-like Acyl-CoA acyltransferase domain
TRINITY_DN10314_c0_g1_i1.path1	157.74	147.84	167.99	53.68	48.77	54.2	5583	6481	6084	1877	2148	2310	0.277	-1.852	3.00791e-32	1.11734e-29	down	7D	560193	563390	+	TRINITY_DN10314_c0_g1_i1	--	--	PREDICTED: protein REVEILLE 2-like isoform X2 [Brachypodium distachyon]	--	SubName: Full=Uncharacterized protein {ECO:0000313|EMBL:KQK16640.1, ECO:0000313|EnsemblPlants:BRADI1G29680.2};	--	GO:0005634,nucleus; GO:0003677,DNA binding; GO:0006355,regulation of transcription, DNA-templated; GO:0006351,transcription, DNA-templated	--
TRINITY_DN10314_c0_g1_i1.path2	44.39	28.8	18.56	10.37	8.39	7.16	1564	1257	669	361	368	304	0.24	-2.061	6.26053e-15	5.06791e-13	down	Chr00	142104163	142107356	+	TRINITY_DN10314_c0_g1_i1	--	--	PREDICTED: protein REVEILLE 2-like isoform X2 [Brachypodium distachyon]	--	SubName: Full=Uncharacterized protein {ECO:0000313|EMBL:KQK16640.1, ECO:0000313|EnsemblPlants:BRADI1G29680.2};	--	GO:0005634,nucleus; GO:0003677,DNA binding; GO:0006355,regulation of transcription, DNA-templated; GO:0006351,transcription, DNA-templated	--
TRINITY_DN10314_c1_g1_i1.path1	22.18	16.09	12.1	7	5.3	7.34	138	124	77	43	41	55	0.327	-1.612	4.53063e-07	9.54916e-06	down	7D	560930	561322	-	TRINITY_DN10314_c1_g1_i1	--	--	--	--	--	--	--	--
TRINITY_DN10317_c0_g2_i2.path1	7.7	6.14	5.44	4	2.95	3.7	354	350	256	182	169	205	0.464	-1.107	6.11733e-07	1.25783e-05	down	5D	320280489	320284240	-	TRINITY_DN10317_c0_g2_i2	--	--	predicted protein [Hordeum vulgare subsp. vulgare]	--	SubName: Full=Uncharacterized protein {ECO:0000313|EnsemblPlants:HORVU5Hr1G080980.2};	--	GO:0003824,catalytic activity	--
TRINITY_DN103192_c0_g1_i1.path1	5.76	15.45	5.63	29.99	43.49	53.83	28	93	28	144	263	315	3.99	1.996	5.7038e-09	1.76341e-07	up	3D	414898737	414899043	-	TRINITY_DN103192_c0_g1_i1	--	--	--	--	--	--	--	--
TRINITY_DN103206_c0_g1_i1.path1	13.13	6.36	8.18	4.48	4.62	3.54	80	48	51	27	35	26	0.385	-1.378	0.000650288	0.00554762	down	1D	471388787	471389171	-	TRINITY_DN103206_c0_g1_i1	--	--	--	--	--	--	--	--
TRINITY_DN10322_c1_g1_i1.path1	7.11	8.13	5.98	2.52	3.28	4.76	331	469	285	116	190	267	0.417	-1.261	4.59607e-08	1.18428e-06	down	5A	63094354	63097295	-	TRINITY_DN10322_c1_g1_i1	--	--	--	--	--	--	--	--
TRINITY_DN10322_c1_g1_i1.path2	8.88	7.88	7.76	2.09	2.22	3.72	414	455	370	96	129	209	0.273	-1.872	3.985e-16	3.69605e-14	down	7D	12564453	12567396	-	TRINITY_DN10322_c1_g1_i1	--	--	--	--	--	--	--	--
TRINITY_DN10325_c0_g1_i1.path2	0.36	0.55	0.57	1.59	1.12	1.16	19	36	31	83	74	74	2.195	1.134	0.0023411	0.0159768	up	5A	203733710	203737219	+	TRINITY_DN10325_c0_g1_i1	--	K02872 large subunit ribosomal protein L13Ae | (RefSeq) 60S ribosomal protein L13a-4 (A)	60S ribosomal protein L13a-1 [Zea mays]	RecName: Full=60S ribosomal protein L13a-2;	SubName: Full=Uncharacterized protein {ECO:0000313|EnsemblPlants:OGLUM03G34300.1};	60S ribosomal protein L13a	GO:0005829,cytosol; GO:0022625,cytosolic large ribosomal subunit; GO:0022626,cytosolic ribosome; GO:0016020,membrane; GO:0009506,plasmodesma; GO:0042788,polysomal ribosome; GO:0003729,mRNA binding; GO:0003735,structural constituent of ribosome; GO:0006412,translation	--
TRINITY_DN10326_c1_g1_i3.path1	8.2	7.61	8.78	5.14	4.16	4.11	260	299	285	161	164	157	0.457	-1.129	3.78239e-07	8.11558e-06	down	2D	10940976	10943786	+	TRINITY_DN10326_c1_g1_i3	--	K03671 thioredoxin 1 | (RefSeq) thioredoxin M3, chloroplastic-like (A)	predicted protein [Hordeum vulgare subsp. vulgare]	RecName: Full=Thioredoxin M3, chloroplastic; Short=OsTrxm3; AltName: Full=OsTrx11; Flags: Precursor;	SubName: Full=Uncharacterized protein {ECO:0000313|EnsemblPlants:HORVU2Hr1G075240.6};	Thioredoxin-like protein	GO:0009507,chloroplast; GO:0005737,cytoplasm; GO:0008047,enzyme activator activity; GO:0016671,oxidoreductase activity, acting on a sulfur group of donors, disulfide as acceptor; GO:0015035,protein disulfide oxidoreductase activity; GO:0047134,protein-disulfide reductase activity; GO:0004791,thioredoxin-disulfide reductase activity; GO:0045454,cell redox homeostasis; GO:0034599,cellular response …	Thioredoxin
TRINITY_DN10326_c1_g1_i3.path2	6.84	6.08	6.53	4.02	2.99	3.9	217	239	212	126	118	149	0.469	-1.092	1.90743e-06	3.49133e-05	down	2A	312676832	312680636	-	TRINITY_DN10326_c1_g1_i3	--	K03671 thioredoxin 1 | (RefSeq) thioredoxin M3, chloroplastic-like (A)	predicted protein [Hordeum vulgare subsp. vulgare]	RecName: Full=Thioredoxin M3, chloroplastic; Short=OsTrxm3; AltName: Full=OsTrx11; Flags: Precursor;	SubName: Full=Uncharacterized protein {ECO:0000313|EnsemblPlants:HORVU2Hr1G075240.6};	Thioredoxin-like protein	GO:0009507,chloroplast; GO:0005737,cytoplasm; GO:0008047,enzyme activator activity; GO:0016671,oxidoreductase activity, acting on a sulfur group of donors, disulfide as acceptor; GO:0015035,protein disulfide oxidoreductase activity; GO:0047134,protein-disulfide reductase activity; GO:0004791,thioredoxin-disulfide reductase activity; GO:0045454,cell redox homeostasis; GO:0034599,cellular response …	Thioredoxin
TRINITY_DN10328_c0_g2_i1.path1	7.39	5.73	6	2.63	3.33	3.87	401	385	333	141	225	253	0.431	-1.215	1.69969e-08	4.76557e-07	down	3D	441279294	441283385	-	TRINITY_DN10328_c0_g2_i1	--	--	--	--	--	--	--	--
TRINITY_DN103301_c0_g1_i1.path1	8.19	5.88	5.34	18.61	9.8	28.88	45	40	30	101	67	191	2.451	1.294	0.000645836	0.00551542	up	4D	205911874	205912220	+	TRINITY_DN103301_c0_g1_i1	--	--	--	--	--	--	--	--
TRINITY_DN103326_c0_g1_i1.path1	10.88	10.93	10.77	49.17	24.74	25.79	82	102	83	366	232	234	2.585	1.37	3.1016e-06	5.39767e-05	up	6A	336238522	336238997	+	TRINITY_DN103326_c0_g1_i1	--	K03521 electron transfer flavoprotein beta subunit | (RefSeq) LOC109785963; electron transfer flavoprotein subunit beta, mitochondrial (A)	electron transfer flavoprotein subunit beta, mitochondrial [Aegilops tauschii subsp. tauschii]	--	SubName: Full=Uncharacterized protein {ECO:0000313|EnsemblPlants:TRIAE_CS42_6BL_TGACv1_501430_AA1617460.2};	--	GO:0009055,electron transfer activity	--
TRINITY_DN10334_c0_g1_i5.path1	3.82	5.59	2.73	1.18	1.45	3.74	85	154	62	26	40	100	0.438	-1.19	0.00240945	0.0163457	down	7C	634561119	634562755	-	TRINITY_DN10334_c0_g1_i5	--	--	--	--	--	--	--	--
TRINITY_DN103401_c0_g1_i1.path1	5.3	9.21	5.58	1.86	0.66	3.05	26	56	28	9	4	18	0.23	-2.12	0.000147977	0.00158062	down	6A	241765008	241771482	-	TRINITY_DN103401_c0_g1_i1	--	--	--	--	--	--	--	--
TRINITY_DN103401_c0_g1_i1.path2	6.13	5.94	5	0.62	0.66	2.55	30	36	25	3	4	15	0.188	-2.415	7.93019e-05	0.000926398	down	6D	208671391	208677858	-	TRINITY_DN103401_c0_g1_i1	--	--	--	--	--	--	--	--
TRINITY_DN103410_c0_g1_i1.path1	8.94	9.91	11.99	4.45	5.84	7.04	59	81	81	29	48	56	0.471	-1.086	0.0012601	0.00960652	down	4D	228530732	228531148	-	TRINITY_DN103410_c0_g1_i1	--	K08286 protein-serine/threonine kinase [EC:2.7.11.-] | (RefSeq) receptor-like protein kinase 5 (A)	predicted protein [Hordeum vulgare subsp. vulgare]	RecName: Full=Receptor protein-tyrosine kinase CEPR2 {ECO:0000303|PubMed:25324386}; EC=2.7.10.1 {ECO:0000255|PROSITE-ProRule:PRU10027}; AltName: Full=Protein C-TERMINALLY ENCODED PEPTIDE RECEPTOR 2 {ECO:0000303|PubMed:25324386}; Flags: Precursor;	SubName: Full=Predicted protein {ECO:0000313|EnsemblPlants:HORVU4Hr1G015740.2};	--	GO:0016021,integral component of membrane; GO:0005886,plasma membrane; GO:0005524,ATP binding; GO:0042277,peptide binding; GO:0017046,peptide hormone binding; GO:0001653,peptide receptor activity; GO:0004674,protein serine/threonine kinase activity; GO:0004714,transmembrane receptor protein tyrosine kinase activity; GO:1902025,nitrate import; GO:2000280,regulation of root development; GO:0048831,…	Leucine Rich repeats (2 copies)
TRINITY_DN103412_c0_g1_i1.path1	9.46	6.85	7.62	4.51	5.7	3.7	68	61	56	32	51	32	0.491	-1.025	0.00496726	0.029239	down	7C	433343972	433344425	+	TRINITY_DN103412_c0_g1_i1	--	--	uncharacterized protein LOC109785565 [Aegilops tauschii subsp. tauschii]	--	SubName: Full=Uncharacterized protein {ECO:0000313|EnsemblPlants:TRIAE_CS42_7AL_TGACv1_556357_AA1761590.1};	--	--	--
TRINITY_DN10342_c1_g1_i1.path1	9.13	9.02	6.84	4.26	4.69	4.39	219	268	168	101	140	127	0.451	-1.149	4.67207e-07	9.82464e-06	down	4A	430004579	430006193	-	TRINITY_DN10342_c1_g1_i1	--	--	--	--	--	--	--	--
TRINITY_DN103429_c0_g1_i1.path1	1.12	1.71	1.61	0.06	0.28	0.93	19	36	28	1	6	19	0.239	-2.063	0.00193158	0.0136624	down	5C	547691039	547692110	-	TRINITY_DN103429_c0_g1_i1	--	--	--	--	--	--	--	--
TRINITY_DN103435_c0_g1_i1.path1	3.41	4.46	3.67	1.55	1.98	2.05	29	47	32	13	21	21	0.408	-1.295	0.00419502	0.0255291	down	4D	315478171	315478708	+	TRINITY_DN103435_c0_g1_i1	--	K21866 ion channel POLLUX/CASTOR | (RefSeq) probable ion channel CASTOR isoform X1 (A)	hypothetical protein CQW23_35624 [Capsicum baccatum]	RecName: Full=Ion channel CASTOR;	SubName: Full=Uncharacterized protein {ECO:0000313|EMBL:PHT24694.1};	--	GO:0016021,integral component of membrane; GO:0031965,nuclear membrane; GO:0006811,ion transport	Castor and Pollux, part of voltage-gated ion channel
TRINITY_DN103455_c0_g1_i1.path1	4.67	1.6	3.6	1.58	0	0.71	33	14	26	11	0	6	0.187	-2.418	0.00163407	0.011889	down	7C	433340674	433341119	+	TRINITY_DN103455_c0_g1_i1	--	--	--	--	--	--	--	--
TRINITY_DN103464_c0_g1_i1.path1	18.68	17.52	22.82	4.73	11.26	12.09	68	79	85	17	51	53	0.399	-1.324	0.000378835	0.00352572	down	5A	390765462	390765691	+	TRINITY_DN103464_c0_g1_i1	--	--	--	--	--	--	--	--
TRINITY_DN103482_c0_g1_i1.path1	267.02	213.21	227	95.49	108.81	78.51	1268	1254	1103	448	643	449	0.337	-1.568	3.80854e-15	3.17432e-13	down	5C	9023849	9024148	+	TRINITY_DN103482_c0_g1_i1	--	--	transcription factor RAU1, partial [Oryza sativa]	RecName: Full=Transcription factor bHLH130; AltName: Full=Basic helix-loop-helix protein 130; Short=AtbHLH130; Short=bHLH 130; AltName: Full=Transcription factor EN 69; AltName: Full=bHLH transcription factor bHLH130;	SubName: Full=Uncharacterized protein {ECO:0000313|EnsemblPlants:HORVU7Hr1G050530.5};	--	GO:0005634,nucleus; GO:0001046,core promoter sequence-specific DNA binding; GO:0003700,DNA-binding transcription factor activity; GO:0046983,protein dimerization activity; GO:0001228,DNA-binding transcription activator activity, RNA polymerase II-specific; GO:0048573,photoperiodism, flowering; GO:0006355,regulation of transcription, DNA-templated; GO:0006366,transcription by RNA polymerase II	--
TRINITY_DN10349_c0_g2_i10.path1	25.25	22.56	22.13	12.85	13.51	13.71	921	1019	826	463	613	602	0.481	-1.055	2.21117e-10	8.77978e-09	down	1A	294341205	294344654	+	TRINITY_DN10349_c0_g2_i10	--	--	--	--	--	--	--	--
TRINITY_DN10353_c0_g1_i1.path1	2.17	7.88	7.26	28.21	17.42	29.19	14	63	48	180	140	227	3.605	1.85	4.83048e-07	1.01316e-05	up	7A	63972902	63973430	-	TRINITY_DN10353_c0_g1_i1	--	--	--	--	--	--	--	--
TRINITY_DN103537_c0_g1_i1.path2	38.75	31.48	38.1	17.11	21.7	17.55	165	166	166	72	115	90	0.438	-1.191	4.30927e-06	7.20302e-05	down	7A	423510496	423510764	+	TRINITY_DN103537_c0_g1_i1	--	--	--	--	--	--	--	--
TRINITY_DN103585_c0_g1_i1.path3	8.63	14.38	12.78	27.89	26.84	30.97	31	64	47	99	120	134	2.007	1.005	0.000960767	0.00768393	up	5C	475463603	475463829	+	TRINITY_DN103585_c0_g1_i1	--	--	--	--	--	--	--	--
TRINITY_DN103593_c0_g1_i1.path1	7.46	5.68	3.48	14.33	14.86	10.7	88	83	42	167	218	152	2.04	1.028	0.000695815	0.0058737	up	2C	115094464	115095208	+	TRINITY_DN103593_c0_g1_i1	--	--	--	--	--	--	--	--
TRINITY_DN103609_c0_g1_i1.path1	7.8	5	5.67	1.62	2.73	0.66	39	31	29	8	17	4	0.232	-2.11	0.000235401	0.00234532	down	7C	423316298	423316613	-	TRINITY_DN103609_c0_g1_i1	--	--	--	--	--	--	--	--
TRINITY_DN10362_c0_g1_i1.path1	0.42	0.85	0.37	3.6	1.61	4.43	11	28	10	94	53	141	4.875	2.285	3.96669e-07	8.46787e-06	up	7A	36985804	36989118	+	TRINITY_DN10362_c0_g1_i1	--	K01184 polygalacturonase [EC:3.2.1.15] | (RefSeq) polygalacturonase At1g48100 (A)	predicted protein [Hordeum vulgare subsp. vulgare]	RecName: Full=Probable polygalacturonase; Short=PG {ECO:0000250|UniProtKB:Q7M1E7}; EC=3.2.1.15; AltName: Full=Pectinase {ECO:0000250|UniProtKB:Q7M1E7};	SubName: Full=Predicted protein {ECO:0000313|EMBL:BAJ97036.1};	--	GO:0016021,integral component of membrane; GO:0004650,polygalacturonase activity; GO:0005975,carbohydrate metabolic process	Glycosyl hydrolases family 28
TRINITY_DN103627_c0_g1_i1.path1	5.11	4.61	5.59	16.75	15.96	18.24	17	19	19	55	66	73	2.796	1.483	0.000202521	0.00206066	up	4C	107697176	107698915	-	TRINITY_DN103627_c0_g1_i1	--	--	--	--	--	--	--	--
TRINITY_DN103636_c0_g1_i1.path1	3.66	3.88	6.26	1.62	1.47	0.76	16	21	28	7	8	4	0.233	-2.1	0.00136484	0.0102376	down	6C	27921595	27921870	+	TRINITY_DN103636_c0_g1_i1	--	--	--	--	--	--	--	--
TRINITY_DN10364_c0_g2_i1.path1	0.75	0.89	1.25	2.54	2.44	2.89	17	25	29	57	69	79	2.284	1.191	0.00205568	0.0143846	up	5A	118898013	119037875	+	TRINITY_DN10364_c0_g2_i1	--	--	uncharacterized protein LOC109780737 [Aegilops tauschii subsp. tauschii]	--	SubName: Full=Uncharacterized protein {ECO:0000313|EnsemblPlants:TRIAE_CS42_5DS_TGACv1_458102_AA1492040.1};	--	--	--
TRINITY_DN103657_c0_g1_i1.path1	13.33	13.46	18.51	4.29	7.91	6.79	88	110	125	28	65	54	0.353	-1.504	4.35912e-06	7.2714e-05	down	4C	168560345	168563445	+	TRINITY_DN103657_c0_g1_i1	--	--	--	--	--	--	--	--
TRINITY_DN10366_c0_g3_i1.path2	9.36	5.96	7.54	5.14	4.35	3.5	142	112	117	77	82	64	0.477	-1.067	0.000387351	0.0035972	down	1A	409473046	409476570	+	TRINITY_DN10366_c0_g3_i1	--	--	--	--	--	--	--	--
TRINITY_DN103669_c0_g1_i1.path1	0.18	0.59	0	5.03	1.92	4.59	1	4	0	27	13	30	11.9	3.573	0.000165442	0.00173451	up	2C	503570033	503570375	-	TRINITY_DN103669_c0_g1_i1	--	--	--	--	--	--	--	--
TRINITY_DN103732_c0_g1_i1.path1	36.62	21.22	20.22	9.9	14.15	11.37	131	94	74	35	63	49	0.384	-1.382	4.53419e-05	0.000572675	down	5C	158545433	158545658	-	TRINITY_DN103732_c0_g1_i1	--	--	--	--	--	--	--	--
TRINITY_DN103738_c0_g1_i1.path1	0.91	1.76	1.96	9.95	3.66	7.41	5	12	11	54	25	49	3.777	1.917	0.000625462	0.00537215	up	6A	209216343	209216689	-	TRINITY_DN103738_c0_g1_i1	--	K01179 endoglucanase [EC:3.2.1.4] | (RefSeq) endoglucanase 11-like (A)	endoglucanase 21-like [Aegilops tauschii subsp. tauschii]	RecName: Full=Endoglucanase 7; EC=3.2.1.4; AltName: Full=Endo-1,4-beta glucanase 7; AltName: Full=OsGLU10; Flags: Precursor;	SubName: Full=Uncharacterized protein {ECO:0000313|EnsemblPlants:HORVU0Hr1G023830.1};	--	GO:0005576,extracellular region; GO:0008810,cellulase activity; GO:0071555,cell wall organization; GO:0030245,cellulose catabolic process	Glycosyl hydrolase family 9
TRINITY_DN103741_c0_g1_i1.path1	5.39	3.87	6.14	0.91	1.2	1.49	18	16	21	3	5	6	0.197	-2.347	0.000971827	0.0077529	down	7C	24837567	24837777	+	TRINITY_DN103741_c0_g1_i1	--	--	--	--	--	--	--	--
TRINITY_DN103756_c0_g1_i1.path1	6.46	7.96	8.68	26.49	25.06	15.03	40	61	55	162	193	112	2.44	1.287	5.56966e-05	0.000683747	up	4C	68321598	68321988	+	TRINITY_DN103756_c0_g1_i1	--	--	--	--	--	--	--	--
TRINITY_DN103791_c0_g1_i1.path2	14.19	13.24	11.9	4.37	7.55	5.65	148	171	127	45	98	71	0.378	-1.402	5.64247e-07	1.16806e-05	down	1D	337361905	337362563	+	TRINITY_DN103791_c0_g1_i1	--	K04733 interleukin-1 receptor-associated kinase 4 [EC:2.7.11.1] | (RefSeq) L-type lectin-domain containing receptor kinase IV.2-like (A)	LOW QUALITY PROTEIN: L-type lectin-domain containing receptor kinase S.4-like [Setaria italica]	RecName: Full=L-type lectin-domain containing receptor kinase V.9; Short=LecRK-V.9; EC=2.7.11.1; Flags: Precursor;	SubName: Full=Uncharacterized protein {ECO:0000313|EnsemblPlants:TRIAE_CS42_1AL_TGACv1_000118_AA0003950.1};	--	GO:0016021,integral component of membrane; GO:0005886,plasma membrane; GO:0005524,ATP binding; GO:0030246,carbohydrate binding; GO:0004674,protein serine/threonine kinase activity	Legume lectin domain
TRINITY_DN103797_c0_g1_i1.path1	9.37	5.62	10.73	2.44	3.23	4.22	35	26	41	9	15	19	0.321	-1.638	0.00123323	0.00944098	down	6C	38467223	38467542	+	TRINITY_DN103797_c0_g1_i1	--	--	--	--	--	--	--	--
TRINITY_DN10381_c1_g1_i1.path1	11.86	7.4	10.43	3.82	4.5	8.5	110	85	99	35	52	95	0.47	-1.088	0.00161324	0.011762	down	1D	197906552	197907137	-	TRINITY_DN10381_c1_g1_i1	--	--	--	--	--	--	--	--
TRINITY_DN103840_c0_g1_i1.path1	0.13	0.91	0.37	3.31	2.73	1.88	1	9	3	26	27	18	4.679	2.226	0.00303757	0.0197412	up	6A	415674318	415674820	-	TRINITY_DN103840_c0_g1_i1	--	--	--	--	--	--	--	--
TRINITY_DN10385_c0_g1_i1.path1	4.33	5.71	4.72	1.17	1.55	3.47	112	183	125	30	50	108	0.349	-1.517	6.71256e-06	0.000107085	down	2D	389355612	389357245	+	TRINITY_DN10385_c0_g1_i1	--	--	--	--	--	--	--	--
TRINITY_DN103864_c0_g1_i1.path1	7.86	3.51	6.37	1.01	0.27	0.83	47	26	39	6	2	6	0.097	-3.361	9.92797e-08	2.40569e-06	down	6D	297098547	297099213	-	TRINITY_DN103864_c0_g1_i1	--	--	predicted protein, partial [Hordeum vulgare subsp. vulgare]	--	SubName: Full=Uncharacterized protein {ECO:0000313|EnsemblPlants:HORVU6Hr1G093680.16};	--	--	--
TRINITY_DN10388_c0_g1_i1.path1	0.18	0.11	0.13	0.87	0.66	0.56	4	3	3	19	18	15	4.19	2.067	0.00978684	0.0498797	up	6A	53237201	53240115	+	TRINITY_DN10388_c0_g1_i1	--	K17345 tetraspanin-5 | (RefSeq) hypothetical protein (A)	predicted protein [Hordeum vulgare subsp. vulgare]	RecName: Full=Tetraspanin-2;	SubName: Full=Uncharacterized protein {ECO:0000313|EnsemblPlants:HORVU6Hr1G039610.1};	--	GO:0016021,integral component of membrane	Tetraspanin family
TRINITY_DN103891_c0_g1_i1.path1	9.25	10.88	7.28	30.14	33.95	21.38	46	67	37	148	210	128	2.648	1.405	4.20404e-06	7.03999e-05	up	2C	532401464	532401777	+	TRINITY_DN103891_c0_g1_i1	--	--	--	--	--	--	--	--
TRINITY_DN103897_c0_g1_i1.path1	15.31	9.21	14.14	3.66	6.49	7.16	55	41	52	13	29	31	0.376	-1.411	0.000971975	0.00775323	down	5D	105611404	105611630	-	TRINITY_DN103897_c0_g1_i1	--	K13420 LRR receptor-like serine/threonine-protein kinase FLS2 [EC:2.7.11.1] | (RefSeq) hypothetical protein (A)	probable LRR receptor-like serine/threonine-protein kinase At3g47570 isoform X1 [Aegilops tauschii subsp. tauschii]	RecName: Full=LRR receptor-like serine/threonine-protein kinase EFR; EC=2.7.11.1; AltName: Full=Elongation factor Tu receptor; Short=EF-Tu receptor; Flags: Precursor;	SubName: Full=Uncharacterized protein {ECO:0000313|EnsemblPlants:TRIAE_CS42_7DL_TGACv1_602658_AA1964320.1};	--	GO:0012505,endomembrane system; GO:0016021,integral component of membrane; GO:0005886,plasma membrane; GO:0005524,ATP binding; GO:0004674,protein serine/threonine kinase activity; GO:0019199,transmembrane receptor protein kinase activity; GO:0010204,defense response signaling pathway, resistance gene-independent; GO:0016045,detection of bacterium; GO:0002764,immune response-regulating signaling p…	--
TRINITY_DN103904_c0_g1_i1.path1	1.4	3.1	3.41	6.01	5.89	11.01	8	22	20	34	42	76	2.402	1.264	0.00842391	0.0443836	up	5C	470433594	470433955	+	TRINITY_DN103904_c0_g1_i1	--	K01087 trehalose 6-phosphate phosphatase [EC:3.1.3.12] | (RefSeq) LOC109775940; probable trehalose-phosphate phosphatase 7 (A)	Trehalose-phosphate phosphatase [Triticum urartu]	RecName: Full=Probable trehalose-phosphate phosphatase 6; Short=OsTPP6; EC=3.1.3.12; AltName: Full=Trehalose 6-phosphate phosphatase;	RecName: Full=Trehalose 6-phosphate phosphatase {ECO:0000256|RuleBase:RU361117}; EC=3.1.3.12 {ECO:0000256|RuleBase:RU361117};	Trehalose-6-phosphate synthase component TPS1 and related subunits	GO:0004805,trehalose-phosphatase activity; GO:0005992,trehalose biosynthetic process	Trehalose-phosphatase
TRINITY_DN103940_c0_g1_i1.path1	5.51	5.49	5.56	14.13	15.94	11.89	30	37	31	76	108	78	2.142	1.099	0.00135044	0.0101525	up	5C	570502688	570503139	-	TRINITY_DN103940_c0_g1_i1	--	--	--	--	--	--	--	--
TRINITY_DN103993_c0_g1_i1.path1	1.01	1.22	0.98	5.35	3.84	5.85	4	6	4	21	19	28	3.917	1.97	0.00454098	0.0272135	up	1C	277112432	277113800	-	TRINITY_DN103993_c0_g1_i1	--	--	hypothetical protein BRADI_5g08980v3 [Brachypodium distachyon]	--	SubName: Full=Uncharacterized protein {ECO:0000313|EnsemblPlants:HORVU2Hr1G072140.8};	--	GO:0009041,uridylate kinase activity; GO:0006221,pyrimidine nucleotide biosynthetic process	--
TRINITY_DN1040_c0_g1_i1.path1	0	0	0	0.94	0.9	0.85	0	0	0	29	35	32	138.764	7.116	5.53049e-08	1.40137e-06	up	6A	423681536	423683502	-	TRINITY_DN1040_c0_g1_i1	--	--	--	--	--	--	--	--
TRINITY_DN1040_c0_g1_i1.path2	0	0.21	0.06	8.32	7.2	11.72	0	8	2	254	277	436	77.996	6.285	1.71175e-32	6.55832e-30	up	4A	356482909	356484860	+	TRINITY_DN1040_c0_g1_i1	--	--	--	--	--	--	--	--
TRINITY_DN104007_c0_g1_i1.path1	85.88	92.61	85.64	284.36	239.56	209.35	295	394	301	965	1024	866	2.346	1.23	1.88581e-10	7.56587e-09	up	3C	1378988	1379204	-	TRINITY_DN104007_c0_g1_i1	--	--	--	--	--	--	--	--
TRINITY_DN10402_c0_g1_i3.path1	2.53	3	3.32	1.18	1.44	1.69	161	236	216	74	114	129	0.407	-1.295	1.1239e-07	2.68689e-06	down	6D	281276068	281282791	+	TRINITY_DN10402_c0_g1_i3	--	K13172 serine/arginine repetitive matrix protein 2 | (RefSeq) uncharacterized protein LOC111450450 isoform X1 (A)	serine/arginine repetitive matrix protein 2-like [Aegilops tauschii subsp. tauschii]	RecName: Full=AUGMIN subunit 8 {ECO:0000303|PubMed:22505726}; AltName: Full=QWRF motif-containing protein 8 {ECO:0000303|PubMed:20978221}; AltName: Full=ROP1 enhancer 2 {ECO:0000303|PubMed:23735294};	SubName: Full=Uncharacterized protein {ECO:0000313|EnsemblPlants:HORVU6Hr1G084700.3};	--	GO:0005874,microtubule; GO:0007049,cell cycle; GO:0051301,cell division	QWRF family
TRINITY_DN10405_c0_g1_i1.path1	0.11	0.43	0.26	1.83	0.99	0.71	2	10	5	34	23	16	3.709	1.891	0.00791197	0.0422859	up	3C	4748909	4750093	-	TRINITY_DN10405_c0_g1_i1	--	K14638 solute carrier family 15 (peptide/histidine transporter), member 3/4 | (RefSeq) LOC109786637; protein NRT1/ PTR FAMILY 8.1-like (A)	predicted protein, partial [Hordeum vulgare subsp. vulgare]	RecName: Full=Protein NRT1/ PTR FAMILY 8.2; Short=AtNPF8.2; AltName: Full=Peptide transporter PTR5;	SubName: Full=Uncharacterized protein {ECO:0000313|EnsemblPlants:HORVU3Hr1G010570.8};	H+/oligopeptide symporter	GO:0016021,integral component of membrane; GO:0005886,plasma membrane; GO:0042936,NA; GO:0022857,transmembrane transporter activity; GO:0042938,dipeptide transport; GO:0009860,pollen tube growth; GO:0015031,protein transport	POT family
TRINITY_DN10405_c0_g1_i1.path2	0.21	0.3	0.16	1.13	1.2	0.89	4	7	3	21	28	20	4.04	2.014	0.00394318	0.0242955	up	Chr00	194640329	194641513	+	TRINITY_DN10405_c0_g1_i1	--	K14638 solute carrier family 15 (peptide/histidine transporter), member 3/4 | (RefSeq) LOC109786637; protein NRT1/ PTR FAMILY 8.1-like (A)	predicted protein, partial [Hordeum vulgare subsp. vulgare]	RecName: Full=Protein NRT1/ PTR FAMILY 8.2; Short=AtNPF8.2; AltName: Full=Peptide transporter PTR5;	SubName: Full=Uncharacterized protein {ECO:0000313|EnsemblPlants:HORVU3Hr1G010570.8};	H+/oligopeptide symporter	GO:0016021,integral component of membrane; GO:0005886,plasma membrane; GO:0042936,NA; GO:0022857,transmembrane transporter activity; GO:0042938,dipeptide transport; GO:0009860,pollen tube growth; GO:0015031,protein transport	POT family
TRINITY_DN104095_c0_g1_i1.path1	2.07	2.74	2.76	6.68	7.43	7.36	11	18	15	35	49	47	2.38	1.251	0.00660292	0.0366918	up	5D	331390687	331391021	+	TRINITY_DN104095_c0_g1_i1	--	--	--	--	--	--	--	--
TRINITY_DN10410_c0_g1_i3.path1	393.46	374.27	400.46	161.37	173.77	150.79	8981	10581	9353	3639	4936	4145	0.35	-1.515	2.37324e-21	3.60314e-19	down	4C	514030790	514033184	-	TRINITY_DN10410_c0_g1_i3	--	K13348 protein Mpv17 | (RefSeq) uncharacterized LOC100846887 (A)	PREDICTED: uncharacterized protein LOC100846887 [Brachypodium distachyon]	--	SubName: Full=Uncharacterized protein {ECO:0000313|EMBL:KQK14324.1, ECO:0000313|EnsemblPlants:BRADI1G15450.1};	Peroxisomal membrane protein MPV17 and related proteins	GO:0005737,cytoplasm; GO:0016021,integral component of membrane	Mpv17 / PMP22 family
TRINITY_DN104107_c0_g1_i1.path1	7.96	5.36	5.02	19.64	15.06	14.04	48	40	31	117	113	102	2.246	1.168	0.000433315	0.00395578	up	5C	535452852	535453232	-	TRINITY_DN104107_c0_g1_i1	--	--	--	--	--	--	--	--
TRINITY_DN10411_c0_g1_i1.path1	10.31	14.3	8.74	27.7	36.71	23.86	188	323	163	499	833	524	2.254	1.173	5.7656e-07	1.19254e-05	up	4A	406954688	406957458	+	TRINITY_DN10411_c0_g1_i1	--	--	uncharacterized protein LOC109765611 [Aegilops tauschii subsp. tauschii]	--	SubName: Full=Uncharacterized protein {ECO:0000313|EnsemblPlants:TRIAE_CS42_6DL_TGACv1_526500_AA1685510.1};	--	--	Protein of unknown function (DUF3531)
TRINITY_DN10412_c1_g1_i2.path2	3.54	3.28	2.43	9.29	10.32	5.22	27	31	19	70	98	48	2.285	1.192	0.00343798	0.0217881	up	7D	427403620	427404338	+	TRINITY_DN10412_c1_g1_i2	--	--	--	--	--	--	--	--
TRINITY_DN104134_c0_g1_i1.path1	176.2	157.97	171.94	82.56	84.82	88.98	661	734	660	306	396	402	0.425	-1.235	2.2917e-12	1.26283e-10	down	2D	364978951	364979187	+	TRINITY_DN104134_c0_g1_i1	--	--	pentatricopeptide repeat-containing protein At5g13770, chloroplastic [Aegilops tauschii subsp. tauschii]	--	SubName: Full=Uncharacterized protein {ECO:0000313|EnsemblPlants:TRIAE_CS42_2BL_TGACv1_129547_AA0388100.1};	--	GO:0009658,chloroplast organization	--
TRINITY_DN104134_c0_g1_i1.path2	224.08	204.03	188.39	82.53	92.64	98.87	830	936	714	302	427	441	0.373	-1.421	1.3322e-16	1.31564e-14	down	2A	374118566	374118799	-	TRINITY_DN104134_c0_g1_i1	--	--	pentatricopeptide repeat-containing protein At5g13770, chloroplastic [Aegilops tauschii subsp. tauschii]	--	SubName: Full=Uncharacterized protein {ECO:0000313|EnsemblPlants:TRIAE_CS42_2BL_TGACv1_129547_AA0388100.1};	--	GO:0009658,chloroplast organization	--
TRINITY_DN104134_c0_g1_i1.path3	125.55	78.55	92.48	43.17	48.62	68.84	471	365	355	160	227	311	0.451	-1.148	1.54598e-06	2.89196e-05	down	2C	525153619	525153855	-	TRINITY_DN104134_c0_g1_i1	--	--	pentatricopeptide repeat-containing protein At5g13770, chloroplastic [Aegilops tauschii subsp. tauschii]	--	SubName: Full=Uncharacterized protein {ECO:0000313|EnsemblPlants:TRIAE_CS42_2BL_TGACv1_129547_AA0388100.1};	--	GO:0009658,chloroplast organization	--
TRINITY_DN104150_c0_g1_i1.path1	3.65	4.28	2.32	0	1.32	1.82	20	29	13	0	9	12	0.262	-1.934	0.00867733	0.0454122	down	2A	394482579	394482924	+	TRINITY_DN104150_c0_g1_i1	--	--	--	--	--	--	--	--
TRINITY_DN10417_c0_g1_i1.path1	2.4	3.42	2.8	6.95	9.66	6.37	21	37	25	60	105	67	2.255	1.173	0.0017884	0.0128068	up	2C	503612836	503613387	+	TRINITY_DN10417_c0_g1_i1	--	--	--	--	--	--	--	--
TRINITY_DN1042_c0_g1_i6.path2	17.19	19.48	20.14	9.98	9.44	12.6	1126	1581	1350	646	770	994	0.471	-1.086	1.37549e-10	5.63272e-09	down	1A	328849208	328856215	+	TRINITY_DN1042_c0_g1_i6	--	K15728 phosphatidate phosphatase LPIN [EC:3.1.3.4] | (RefSeq) LOC109762329; phosphatidate phosphatase PAH1 (A)	phosphatidate phosphatase PAH1 [Aegilops tauschii subsp. tauschii]	RecName: Full=Phosphatidate phosphatase PAH1; EC=3.1.3.4; AltName: Full=Phosphatidic acid phosphohydrolase 1; Short=AtPAH1;	SubName: Full=Uncharacterized protein {ECO:0000313|EnsemblPlants:TRIAE_CS42_1AL_TGACv1_003232_AA0048820.5};	Protein involved in plasmid maintenance/nuclear protein involved in lipid metabolism	GO:0005829,cytosol; GO:0000139,Golgi membrane; GO:0032586,protein storage vacuole membrane; GO:0008195,phosphatidate phosphatase activity; GO:0016036,cellular response to phosphate starvation; GO:0019375,galactolipid biosynthetic process; GO:0006886,intracellular protein transport; GO:0006629,lipid metabolic process; GO:0008654,phospholipid biosynthetic process	LNS2 (Lipin/Ned1/Smp2)
TRINITY_DN104226_c0_g1_i1.path1	39.19	24.38	32.44	14.96	21.34	16.36	183	141	155	69	124	92	0.461	-1.116	8.26091e-05	0.000958803	down	4A	294760728	294761022	-	TRINITY_DN104226_c0_g1_i1	--	--	--	--	--	--	--	--
TRINITY_DN10425_c1_g1_i2.path1	1.15	0.31	0.07	4.87	2.89	5.2	15	5	1	63	47	82	7.214	2.851	1.06793e-06	2.08066e-05	up	2C	510752554	510753724	-	TRINITY_DN10425_c1_g1_i2	--	K23490 cytochrome b5 | (RefSeq) metal-nicotianamine transporter YSL3-like (A)	putative metal-nicotianamine transporter YSL9 [Triticum urartu]	RecName: Full=Probable metal-nicotianamine transporter YSL9; AltName: Full=Protein YELLOW STRIPE LIKE 9; Short=OsYSL9;	SubName: Full=Putative iron(III)-phytosiderophore uptake mediator (Yellow stripe like transporter) {ECO:0000313|EMBL:CCJ47186.1}; Flags: Fragment;	--	GO:0016021,integral component of membrane; GO:0005886,plasma membrane; GO:0051980,iron-nicotianamine transmembrane transporter activity; GO:0010039,response to iron ion; GO:0048316,seed development	OPT oligopeptide transporter protein
TRINITY_DN10425_c1_g1_i2.path2	0.15	0.43	0.67	3.09	3.13	3.3	2	7	9	40	51	52	6.336	2.664	2.6674e-06	4.71492e-05	up	2D	377918335	377919507	+	TRINITY_DN10425_c1_g1_i2	--	K23490 cytochrome b5 | (RefSeq) metal-nicotianamine transporter YSL3-like (A)	PREDICTED: probable metal-nicotianamine transporter YSL9 isoform X2 [Brachypodium distachyon]	RecName: Full=Probable metal-nicotianamine transporter YSL9; AltName: Full=Protein YELLOW STRIPE LIKE 9; Short=OsYSL9;	SubName: Full=Putative iron(III)-phytosiderophore uptake mediator (Yellow stripe like transporter) {ECO:0000313|EMBL:CCJ47186.1}; Flags: Fragment;	--	GO:0016021,integral component of membrane; GO:0005886,plasma membrane; GO:0051980,iron-nicotianamine transmembrane transporter activity; GO:0010039,response to iron ion; GO:0048316,seed development	OPT oligopeptide transporter protein
TRINITY_DN10425_c1_g1_i2.path3	0.53	0.19	0.15	2.63	4.17	5.14	7	3	2	34	68	81	11.745	3.554	5.37538e-09	1.66963e-07	up	2A	360948746	360949918	-	TRINITY_DN10425_c1_g1_i2	--	K23490 cytochrome b5 | (RefSeq) metal-nicotianamine transporter YSL3-like (A)	putative metal-nicotianamine transporter YSL9 [Triticum urartu]	RecName: Full=Probable metal-nicotianamine transporter YSL9; AltName: Full=Protein YELLOW STRIPE LIKE 9; Short=OsYSL9;	SubName: Full=Putative iron(III)-phytosiderophore uptake mediator (Yellow stripe like transporter) {ECO:0000313|EMBL:CCJ47186.1}; Flags: Fragment;	--	GO:0016021,integral component of membrane; GO:0005886,plasma membrane; GO:0051980,iron-nicotianamine transmembrane transporter activity; GO:0010039,response to iron ion; GO:0048316,seed development	OPT oligopeptide transporter protein
TRINITY_DN104256_c0_g1_i1.path1	6.38	6.58	9.47	2.67	2.65	1.28	29	37	44	12	15	7	0.247	-2.016	0.000101747	0.00114339	down	5C	556326442	556326728	-	TRINITY_DN104256_c0_g1_i1	--	--	--	--	--	--	--	--
TRINITY_DN104258_c0_g1_i1.path1	3.84	3.88	4.32	1.55	0.15	2.07	20	25	23	8	1	13	0.258	-1.957	0.00407307	0.0249154	down	4D	386214341	386214669	+	TRINITY_DN104258_c0_g1_i1	--	--	--	--	--	--	--	--
TRINITY_DN10426_c0_g1_i4.path2	0.71	1.74	1.18	3.04	2.66	2.96	30	91	51	127	140	151	2.01	1.007	0.00144364	0.0107231	up	6A	277826062	277840955	-	TRINITY_DN10426_c0_g1_i4	--	K12489 Arf-GAP with coiled-coil, ANK repeat and PH domain-containing protein | (RefSeq) LOC109766119; ADP-ribosylation factor GTPase-activating protein AGD2-like (A)	ADP-ribosylation factor GTPase-activating protein AGD2-like [Aegilops tauschii subsp. tauschii]	RecName: Full=ADP-ribosylation factor GTPase-activating protein AGD2; Short=ARF GAP AGD2; AltName: Full=Protein ARF-GAP DOMAIN 2; Short=AtAGD2;	SubName: Full=Uncharacterized protein {ECO:0000313|EnsemblPlants:TRIAE_CS42_6AL_TGACv1_473057_AA1528320.1};	Putative GTPase activating proteins (GAPs)	GO:0005737,cytoplasm; GO:0005096,GTPase activator activity; GO:0046872,metal ion binding	BAR domain of APPL family
TRINITY_DN104264_c0_g1_i1.path1	3.03	2.24	1.23	7.16	8.93	6.5	12	11	5	28	44	31	2.95	1.561	0.00501831	0.0294755	up	6A	422942374	422946573	-	TRINITY_DN104264_c0_g1_i1	--	K00103 L-gulonolactone oxidase [EC:1.1.3.8] | (RefSeq) L-gulonolactone oxidase 3 (A)	PREDICTED: L-gulonolactone oxidase 3 [Brachypodium distachyon]	RecName: Full=L-gulonolactone oxidase 3 {ECO:0000303|PubMed:20622436}; Short=AtGulLO3 {ECO:0000303|PubMed:20622436}; EC=1.1.3.8 {ECO:0000269|PubMed:20622436}; Flags: Precursor;	SubName: Full=Uncharacterized protein {ECO:0000313|EMBL:EMT30185.1, ECO:0000313|EnsemblPlants:EMT30185};	D-arabinono-1, 4-lactone oxidase	GO:0016020,membrane; GO:0005773,vacuole; GO:0003885,D-arabinono-1,4-lactone oxidase activity; GO:0050660,flavin adenine dinucleotide binding; GO:0050105,L-gulonolactone oxidase activity; GO:0019853,L-ascorbic acid biosynthetic process	--
TRINITY_DN104284_c0_g1_i1.path2	3.35	2.5	3.02	12.79	8.08	7.49	13	12	12	49	39	35	2.698	1.432	0.0043557	0.0263082	up	1D	283155515	283155759	+	TRINITY_DN104284_c0_g1_i1	--	--	--	--	--	--	--	--
TRINITY_DN104387_c0_g1_i1.path1	5.25	3.36	2.83	0.73	0.87	1.95	29	23	16	4	6	13	0.261	-1.936	0.00234791	0.0160188	down	2C	187767314	187767770	+	TRINITY_DN104387_c0_g1_i1	--	K01662 1-deoxy-D-xylulose-5-phosphate synthase [EC:2.2.1.7] | (RefSeq) probable 1-deoxy-D-xylulose-5-phosphate synthase 2, chloroplastic (A)	PREDICTED: probable 1-deoxy-D-xylulose-5-phosphate synthase 2, chloroplastic [Brachypodium distachyon]	RecName: Full=Probable 1-deoxy-D-xylulose-5-phosphate synthase 2, chloroplastic; Short=1-deoxyxylulose-5-phosphate synthase; Short=DXP synthase; Short=DXPS; EC=2.2.1.7; Flags: Precursor;	SubName: Full=Uncharacterized protein {ECO:0000313|EnsemblPlants:HORVU1Hr1G084900.2};	Transketolase	GO:0009507,chloroplast; GO:0008661,1-deoxy-D-xylulose-5-phosphate synthase activity; GO:0046872,metal ion binding; GO:0052865,1-deoxy-D-xylulose 5-phosphate biosynthetic process; GO:0016114,terpenoid biosynthetic process; GO:0009228,thiamine biosynthetic process	Transketolase, C-terminal domain
TRINITY_DN104392_c0_g1_i1.path1	14.1	6.64	8.33	1.19	2.6	3.17	48	28	29	4	11	13	0.202	-2.305	3.78942e-05	0.000489766	down	2A	442405310	442405524	+	TRINITY_DN104392_c0_g1_i1	--	--	--	--	--	--	--	--
TRINITY_DN104392_c0_g1_i1.path2	19.58	9.58	12.75	4.5	4.77	6.16	66	40	44	15	20	25	0.308	-1.697	0.000109067	0.0012128	down	7D	433469308	433469520	+	TRINITY_DN104392_c0_g1_i1	--	--	--	--	--	--	--	--
TRINITY_DN104406_c0_g1_i1.path1	8.54	6.61	5.91	22.88	17.73	22.02	48	46	34	127	124	149	2.502	1.323	1.08941e-05	0.000164071	up	4D	361469146	361469500	+	TRINITY_DN104406_c0_g1_i1	--	--	--	--	--	--	--	--
TRINITY_DN104486_c0_g1_i1.path1	18.18	11.1	18	7.79	4.5	6.78	78	59	79	33	24	35	0.335	-1.579	3.28625e-05	0.000433383	down	5C	421978360	421978630	+	TRINITY_DN104486_c0_g1_i1	--	--	--	--	--	--	--	--
TRINITY_DN104489_c0_g1_i1.path1	4.97	2.45	1.35	0.28	0.44	0.46	18	11	5	1	2	2	0.115	-3.12	0.00270162	0.017937	down	4C	543615754	543615982	+	TRINITY_DN104489_c0_g1_i1	--	--	--	--	--	--	--	--
TRINITY_DN10451_c0_g1_i2.path1	0.2	1.59	0.39	12.37	6.73	3.85	2	20	4	124	85	47	8.884	3.151	6.09714e-08	1.53269e-06	up	6A	275892212	275892852	-	TRINITY_DN10451_c0_g1_i2	--	--	hypothetical protein TRIUR3_13998 [Triticum urartu]	--	SubName: Full=Uncharacterized protein {ECO:0000313|EnsemblPlants:TRIAE_CS42_5BS_TGACv1_423248_AA1372220.1};	--	--	--
TRINITY_DN10451_c0_g1_i2.path2	1.79	3.85	1.07	15.99	9.26	7.67	18	48	11	159	116	93	4.176	2.062	1.15012e-06	2.22306e-05	up	6D	238468957	238469592	-	TRINITY_DN10451_c0_g1_i2	--	--	hypothetical protein TRIUR3_13998 [Triticum urartu]	--	SubName: Full=Uncharacterized protein {ECO:0000313|EnsemblPlants:TRIAE_CS42_5BS_TGACv1_423248_AA1372220.1};	--	--	--
TRINITY_DN104530_c0_g1_i1.path2	10.87	6.41	5.17	0.3	0.94	1.95	37	27	18	1	4	8	0.121	-3.043	1.20993e-05	0.000180219	down	6A	318836281	318836495	+	TRINITY_DN104530_c0_g1_i1	--	--	--	--	--	--	--	--
TRINITY_DN104556_c0_g1_i1.path1	5.46	10.41	6.84	18.14	16.16	27.59	25	59	32	82	92	152	2.274	1.185	0.000571405	0.00497677	up	2A	385771218	385771506	+	TRINITY_DN104556_c0_g1_i1	--	--	--	--	--	--	--	--
TRINITY_DN104592_c0_g1_i1.path1	9.71	10.93	16.84	5.81	6.37	7.61	71	99	126	42	58	67	0.44	-1.183	0.000273181	0.00265804	down	7C	627860697	627861479	-	TRINITY_DN104592_c0_g1_i1	--	K22935 D-ribulokinase [EC:2.7.1.47] | (RefSeq) xylulose kinase isoform X1 (A)	Xylulose kinase [Triticum urartu]	RecName: Full=D-ribulose kinase {ECO:0000305|PubMed:27223615}; Short=D-ribulokinase {ECO:0000305}; EC=2.7.1.47 {ECO:0000269|PubMed:27223615}; AltName: Full=Inactive Xylulose kinase 1 {ECO:0000303|PubMed:16920870}; Short=Atxk-1 {ECO:0000303|PubMed:16920870}; Flags: Precursor;	SubName: Full=Xylulose kinase {ECO:0000313|EMBL:EMS67371.1, ECO:0000313|EnsemblPlants:TRIUR3_25819-P1};	--	GO:0009507,chloroplast; GO:0005737,cytoplasm; GO:0009536,plastid; GO:0005524,ATP binding; GO:0019150,D-ribulokinase activity; GO:0016773,phosphotransferase activity, alcohol group as acceptor; GO:0016310,phosphorylation	FGGY family of carbohydrate kinases, N-terminal domain
TRINITY_DN10463_c0_g3_i1.path1	3.96	3.55	4.39	1.08	1.25	1.92	89	99	101	24	35	52	0.299	-1.744	1.28888e-07	3.05337e-06	down	3A	119071417	119072837	-	TRINITY_DN10463_c0_g3_i1	--	--	--	--	--	--	--	--
TRINITY_DN10463_c0_g3_i1.path2	5.65	4.92	4.61	2.29	2.79	2.81	127	137	106	51	78	76	0.438	-1.191	1.14515e-05	0.000171582	down	3D	252471715	252473135	-	TRINITY_DN10463_c0_g3_i1	--	--	--	--	--	--	--	--
TRINITY_DN104637_c0_g1_i1.path1	4.51	2.37	1.54	0.23	0.18	0.75	20	13	7	1	1	4	0.116	-3.108	0.00136549	0.0102403	down	1A	376399188	376399467	+	TRINITY_DN104637_c0_g1_i1	--	--	--	--	--	--	--	--
TRINITY_DN104653_c0_g1_i1.path1	0	0.9	1.09	27.32	14.09	30.5	0	4	4	97	63	132	29.577	4.886	3.96241e-14	2.82342e-12	up	1A	345625423	345625649	-	TRINITY_DN104653_c0_g1_i1	--	--	--	--	--	--	--	--
TRINITY_DN104653_c0_g1_i1.path2	1.65	2.88	0.54	36.98	36.42	24.86	6	13	2	133	165	109	16.136	4.012	7.33091e-18	8.17788e-16	up	1D	336042384	336042613	-	TRINITY_DN104653_c0_g1_i1	--	--	--	--	--	--	--	--
TRINITY_DN104670_c0_g1_i1.path1	6.18	10.17	12.52	2.46	2.66	1.65	28	57	58	11	15	9	0.197	-2.344	1.72629e-06	3.19899e-05	down	7D	15808221	15810611	-	TRINITY_DN104670_c0_g1_i1	--	--	MACPF domain-containing protein At1g14780-like isoform X2 [Aegilops tauschii subsp. tauschii]	--	SubName: Full=Uncharacterized protein {ECO:0000313|EMBL:EMT08819.1, ECO:0000313|EnsemblPlants:EMT08819};	--	--	--
TRINITY_DN104672_c0_g1_i1.path1	5.83	4.09	3.45	11.17	13.8	9.55	38	33	23	72	112	75	2.194	1.133	0.00181757	0.0129878	up	3A	12895124	12895535	+	TRINITY_DN104672_c0_g1_i1	--	--	--	--	--	--	--	--
TRINITY_DN10470_c0_g1_i2.path1	0.47	0.79	0.72	0.31	0.16	0.03	14	29	22	9	6	1	0.209	-2.259	0.00178492	0.0127857	down	7A	394733399	394735277	-	TRINITY_DN10470_c0_g1_i2	--	K22312 hydroxyjasmonate sulfotransferase [EC:2.8.2.39] | (RefSeq) LOC109739421; flavonol sulfotransferase-like (A)	flavonol sulfotransferase-like [Aegilops tauschii subsp. tauschii]	RecName: Full=Cytosolic sulfotransferase 5; Short=AtSOT5; EC=2.8.2.-; AltName: Full=Flavonoid 7-sulfotransferase 3a; Short=AtST3a;	RecName: Full=Sulfotransferase {ECO:0000256|RuleBase:RU361155}; EC=2.8.2.- {ECO:0000256|RuleBase:RU361155};	Sulfotransferase	GO:0005737,cytoplasm; GO:1990135,flavonoid sulfotransferase activity; GO:0008146,sulfotransferase activity; GO:0009812,flavonoid metabolic process	--
TRINITY_DN104750_c0_g1_i1.path1	5.81	3.32	1.66	0	1.17	1.41	24	17	7	0	6	7	0.205	-2.284	0.00724507	0.0394896	down	7D	408988887	408989147	+	TRINITY_DN104750_c0_g1_i1	--	--	--	--	--	--	--	--
TRINITY_DN10476_c0_g1_i1.path1	1.3	0.63	0.25	2.37	6.48	5.83	5	3	1	9	31	27	5.727	2.518	0.00231026	0.0158062	up	5D	383118878	383119120	+	TRINITY_DN10476_c0_g1_i1	--	--	--	--	--	--	--	--
TRINITY_DN10476_c0_g1_i1.path2	2.34	5.04	1.78	24.74	23.82	20.08	9	24	7	94	114	93	6.274	2.649	2.4798e-10	9.77743e-09	up	5A	425319760	425320002	+	TRINITY_DN10476_c0_g1_i1	--	--	--	--	--	--	--	--
TRINITY_DN104762_c0_g1_i1.path2	11.39	15.39	18.42	8.81	4.99	10.49	55	92	91	42	30	61	0.446	-1.165	0.00115549	0.00894125	down	2A	434969360	434969664	+	TRINITY_DN104762_c0_g1_i1	--	--	--	--	SubName: Full=Uncharacterized protein {ECO:0000313|EnsemblPlants:HORVU7Hr1G095010.10};	--	GO:0005509,calcium ion binding	--
TRINITY_DN104764_c0_g1_i1.path1	11.86	8.2	5.46	3.6	6.12	2.67	70	60	33	21	45	19	0.415	-1.268	0.00408411	0.0249683	down	2A	394483182	394483617	-	TRINITY_DN104764_c0_g1_i1	--	--	--	--	--	--	--	--
TRINITY_DN10477_c1_g1_i6.path1	6.82	6.89	5.66	18.28	18.35	17.33	199	249	169	527	666	609	2.35	1.233	5.11545e-11	2.26189e-09	up	5D	372581238	372584861	-	TRINITY_DN10477_c1_g1_i6	--	--	--	--	--	--	--	--
TRINITY_DN104787_c0_g1_i1.path1	2.21	1.78	1.57	9.34	5.96	8.49	11	11	8	46	37	51	3.601	1.848	0.000239393	0.00237895	up	5D	490422176	490422490	-	TRINITY_DN104787_c0_g1_i1	--	--	--	--	--	--	--	--
TRINITY_DN10483_c0_g1_i1.path1	15.61	14.78	15.84	8.35	9.53	8.22	104	122	108	55	79	66	0.475	-1.073	0.000115673	0.00127694	down	3C	373609958	373613298	+	TRINITY_DN10483_c0_g1_i1	--	--	--	--	--	--	--	--
TRINITY_DN104887_c0_g1_i1.path2	208.48	190.69	184.51	123.21	91.96	121.67	858	972	777	501	471	603	0.484	-1.048	5.08146e-09	1.58506e-07	down	3C	635809075	635809334	+	TRINITY_DN104887_c0_g1_i1	--	--	--	--	--	--	--	--
TRINITY_DN104901_c0_g1_i1.path1	0	0.25	0	2.82	2.49	4.11	0	1	0	9	10	16	25.568	4.676	0.00167469	0.0121339	up	3D	186208041	186208244	+	TRINITY_DN104901_c0_g1_i1	--	--	--	--	--	--	--	--
TRINITY_DN104943_c0_g1_i1.path1	44.59	44.26	39.34	23.82	23.64	15.94	144	177	130	76	95	62	0.418	-1.258	4.28841e-06	7.17143e-05	down	6A	377723829	377724032	-	TRINITY_DN104943_c0_g1_i1	--	--	--	--	--	--	--	--
TRINITY_DN104948_c0_g1_i1.path1	3.65	2.11	8.16	1.06	0.42	0.65	14	10	32	4	2	3	0.124	-3.013	0.000285651	0.00276357	down	6D	292866340	292866581	-	TRINITY_DN104948_c0_g1_i1	--	--	--	--	--	--	--	--
TRINITY_DN10496_c0_g1_i2.path1	2.81	3.9	2.12	8.82	9.95	7.8	92	158	71	285	405	307	2.552	1.352	5.66007e-08	1.43074e-06	up	6A	294465154	294470184	+	TRINITY_DN10496_c0_g1_i2	--	--	PREDICTED: uncharacterized protein LOC100844800 isoform X2 [Brachypodium distachyon]	--	SubName: Full=Uncharacterized protein {ECO:0000313|EMBL:KQK00067.1, ECO:0000313|EnsemblPlants:BRADI3G47140.1};	--	GO:0016021,integral component of membrane	Intermediate filament protein
TRINITY_DN105001_c0_g1_i1.path1	49.85	61.77	67.53	882.47	974.27	630.95	202	310	280	3533	4913	3079	11.747	3.554	8.91396e-61	2.41598e-57	up	5C	59625549	59625804	+	TRINITY_DN105001_c0_g1_i1	--	--	hypothetical protein BRADI_1g14170v3 [Brachypodium distachyon]	--	SubName: Full=Uncharacterized protein {ECO:0000313|EMBL:KQK14070.1, ECO:0000313|EnsemblPlants:BRADI1G14170.2};	--	--	--
TRINITY_DN105019_c0_g1_i1.path1	2.07	0.98	2.02	0.35	0.14	0.57	12	7	12	2	1	4	0.173	-2.535	0.00925965	0.0477662	down	4C	215336680	215337137	-	TRINITY_DN105019_c0_g1_i1	--	--	hypothetical protein BRADI_3g19020v3 [Brachypodium distachyon]	--	SubName: Full=Uncharacterized protein {ECO:0000313|EMBL:KQJ95790.1};	--	GO:0005524,ATP binding; GO:0004672,protein kinase activity	--
TRINITY_DN10503_c0_g1_i1.path1	1.67	2.33	2.64	1	1.45	1.2	37	64	60	22	40	32	0.463	-1.111	0.00425205	0.0257989	down	3D	294123495	294125627	+	TRINITY_DN10503_c0_g1_i1	--	--	protein CHUP1, chloroplastic-like isoform X1 [Aegilops tauschii subsp. tauschii]	RecName: Full=Protein CHUP1, chloroplastic; AltName: Full=Protein CHLOROPLAST UNUSUAL POSITIONING 1;	SubName: Full=Uncharacterized protein {ECO:0000313|EnsemblPlants:TRIAE_CS42_3DL_TGACv1_251638_AA0883400.1};	--	GO:0009507,chloroplast; GO:0009707,chloroplast outer membrane; GO:0009902,chloroplast relocation	--
TRINITY_DN10503_c0_g1_i1.path2	1.8	2.1	1.58	0.64	1.19	0.52	40	58	36	14	33	14	0.366	-1.449	0.00142006	0.0105759	down	3A	69312307	69314211	-	TRINITY_DN10503_c0_g1_i1	--	--	protein CHUP1, chloroplastic-like isoform X2 [Aegilops tauschii subsp. tauschii]	RecName: Full=Protein CHUP1, chloroplastic; AltName: Full=Protein CHLOROPLAST UNUSUAL POSITIONING 1;	SubName: Full=Uncharacterized protein {ECO:0000313|EnsemblPlants:TRIAE_CS42_3B_TGACv1_225220_AA0806240.2};	--	GO:0009507,chloroplast; GO:0009707,chloroplast outer membrane; GO:0009902,chloroplast relocation	--
TRINITY_DN105034_c0_g1_i1.path1	3.27	1.76	2.4	14.06	12.69	8.37	12	8	9	51	58	37	4.031	2.011	9.00333e-05	0.00103172	up	2A	393520441	393520672	+	TRINITY_DN105034_c0_g1_i1	--	--	--	--	--	--	--	--
TRINITY_DN105038_c0_g1_i1.path1	78.9	82.96	101.17	10.53	17.33	35.6	311	405	408	41	85	169	0.199	-2.326	4.81883e-14	3.394e-12	down	3C	592742949	592743197	-	TRINITY_DN105038_c0_g1_i1	--	K01188 beta-glucosidase [EC:3.2.1.21] | (RefSeq) cyanidin 3-O-glucoside 7-O-glucosyltransferase (acyl-glucose)-like (A)	Beta-glucosidase 5 [Triticum urartu]	RecName: Full=Beta-glucosidase 22; Short=Os5bglu22; EC=3.2.1.21; Flags: Precursor;	SubName: Full=Uncharacterized protein {ECO:0000313|EnsemblPlants:HORVU3Hr1G079730.2};	Beta-glucosidase, lactase phlorizinhydrolase, and related proteins	GO:0008422,beta-glucosidase activity; GO:0102483,scopolin beta-glucosidase activity; GO:0005975,carbohydrate metabolic process; GO:1901657,glycosyl compound metabolic process	--
TRINITY_DN10505_c0_g1_i6.path1	1.19	1.1	1.12	6.06	4.84	4.9	28	32	27	141	142	139	3.912	1.968	3.9778e-10	1.51374e-08	up	3A	55934517	55939287	+	TRINITY_DN10505_c0_g1_i6	--	K09060 plant G-box-binding factor | (RefSeq) G-box-binding factor 3-like (A)	PREDICTED: G-box-binding factor 3-like [Brachypodium distachyon]	RecName: Full=Common plant regulatory factor 1; Short=CPRF-1;	SubName: Full=Uncharacterized protein {ECO:0000313|EnsemblPlants:BRADI2G45567.1};	--	GO:0005634,nucleus; GO:0003677,DNA binding; GO:0003700,DNA-binding transcription factor activity; GO:0006351,transcription, DNA-templated	G-box binding protein MFMR
TRINITY_DN105055_c0_g1_i1.path2	19.6	10.15	8	7.99	4	7.29	67	43	28	27	17	30	0.427	-1.228	0.00778296	0.0417742	down	5A	475942122	475942922	+	TRINITY_DN105055_c0_g1_i1	--	--	BTB/POZ domain-containing protein POB1 [Zea mays]	RecName: Full=BTB/POZ domain-containing protein POB1; AltName: Full=POZ/BTB CONTAINING-PROTEIN 1; Short=AtPOB1;	SubName: Full=BTB/POZ domain-containing protein POB1 {ECO:0000313|EMBL:AQK69996.1};	--	GO:0031463,Cul3-RING ubiquitin ligase complex; GO:0005634,nucleus; GO:0046982,protein heterodimerization activity; GO:0042803,protein homodimerization activity; GO:0016567,protein ubiquitination; GO:0010114,response to red light	BTB/POZ domain
TRINITY_DN10506_c0_g1_i15.path1	8.42	8.76	7.9	2.88	3.53	4.08	228	294	219	77	119	133	0.351	-1.509	1.46811e-11	7.12903e-10	down	6A	404527952	404532432	+	TRINITY_DN10506_c0_g1_i15	--	K16818 phospholipase A1 [EC:3.1.1.32] | (RefSeq) phospholipase A(1) DAD1, chloroplastic-like (A)	PREDICTED: lipase-like [Brachypodium distachyon]	RecName: Full=Phospholipase A(1) DAD1, chloroplastic; EC=3.1.1.32; AltName: Full=Phospholipase A1-Ibeta1; AltName: Full=Protein DEFECTIVE IN ANTHER DEHISCENCE 1; Short=AtDAD1; Flags: Precursor;	SubName: Full=Uncharacterized protein {ECO:0000313|EnsemblPlants:HORVU2Hr1G020330.17};	Predicted lipase	GO:0009507,chloroplast; GO:0052740,1-acyl-2-lysophosphatidylserine acylhydrolase activity; GO:0008970,phospholipase A1 activity; GO:0052739,phosphatidylserine 1-acylhydrolase activity; GO:0016042,lipid catabolic process	Lipase (class 3)
TRINITY_DN10506_c0_g2_i1.path1	2.84	3.35	3.2	15.27	15.11	10.17	13	19	15	69	86	56	3.648	1.867	9.5366e-06	0.000145847	up	7C	144693941	144694229	+	TRINITY_DN10506_c0_g2_i1	--	--	--	--	--	--	--	--
TRINITY_DN10506_c1_g1_i2.path1	0.89	1.88	1.22	5.06	4.24	5.12	10	26	14	56	59	69	3.02	1.595	0.000194266	0.00198967	up	7C	144695307	144696240	-	TRINITY_DN10506_c1_g1_i2	--	--	--	--	--	--	--	--
TRINITY_DN105079_c0_g1_i1.path1	12.63	5.78	5.76	43.06	25.55	31.48	60	34	28	202	151	180	3.496	1.806	1.87459e-07	4.30304e-06	up	4D	231020550	231020849	-	TRINITY_DN105079_c0_g1_i1	--	--	--	--	--	--	--	--
TRINITY_DN10510_c0_g3_i1.path1	2.02	4.7	4.6	12.02	9.9	9.67	9	26	21	53	55	52	2.34	1.226	0.00586565	0.0333677	up	2C	457820824	457821105	-	TRINITY_DN10510_c0_g3_i1	--	K13617 protein phosphatase methylesterase 1 [EC:3.1.1.89] | (RefSeq) AI714808; uncharacterized protein LOC100283464 (A)	probable protein phosphatase methylesterase 1 isoform X3 [Setaria italica]	--	SubName: Full=Protein phosphatase methylesterase 1 {ECO:0000313|EnsemblPlants:TRIAE_CS42_2DL_TGACv1_158200_AA0512240.1};	--	GO:0051723,protein methylesterase activity; GO:0006482,protein demethylation	--
TRINITY_DN105177_c0_g1_i1.path1	9.99	5.85	8.05	4.8	4.41	2.49	40	29	33	19	22	12	0.413	-1.277	0.0093502	0.048118	down	1A	362392301	362392553	+	TRINITY_DN105177_c0_g1_i1	--	--	--	--	--	--	--	--
TRINITY_DN105179_c0_g1_i1.path2	4.29	7.85	6.15	23.73	7.35	22.08	15	34	22	82	32	93	2.42	1.275	0.00563509	0.032307	up	5A	437054686	437054906	-	TRINITY_DN105179_c0_g1_i1	--	--	--	--	--	--	--	--
TRINITY_DN10520_c0_g1_i1.path1	3.25	1.89	2.16	6.84	6.27	5.94	25	18	17	52	60	55	2.206	1.141	0.00653774	0.0363987	up	2D	491011243	491011728	-	TRINITY_DN10520_c0_g1_i1	--	--	--	--	--	--	--	--
TRINITY_DN10524_c0_g1_i6.path1	2.61	2.61	2.33	0.77	0.97	0.88	113	140	103	33	52	46	0.293	-1.771	1.06036e-09	3.7815e-08	down	4A	414795186	414802136	+	TRINITY_DN10524_c0_g1_i6	--	K01392 thimet oligopeptidase [EC:3.4.24.15] | (RefSeq) LOC109754044; probable thimet oligopeptidase (A)	unnamed protein product [Triticum aestivum]	RecName: Full=Probable thimet oligopeptidase; EC=3.4.24.15; AltName: Full=Zincin-like metalloproteases-like protein 1;	SubName: Full=Uncharacterized protein {ECO:0000313|EnsemblPlants:HORVU3Hr1G088910.4};	Metalloendopeptidase family - saccharolysin & thimet oligopeptidase	GO:0005737,cytoplasm; GO:0046872,metal ion binding; GO:0004222,metalloendopeptidase activity; GO:0006518,peptide metabolic process	Peptidase family M3
TRINITY_DN10524_c0_g1_i6.path2	8.68	7.08	6.72	2.8	3.89	2.88	380	384	301	121	212	152	0.36	-1.475	9.24392e-11	3.89218e-09	down	4D	340233315	340240301	+	TRINITY_DN10524_c0_g1_i6	--	K01392 thimet oligopeptidase [EC:3.4.24.15] | (RefSeq) LOC109754044; probable thimet oligopeptidase (A)	unnamed protein product [Triticum aestivum]	RecName: Full=Probable thimet oligopeptidase; EC=3.4.24.15; AltName: Full=Zincin-like metalloproteases-like protein 1;	SubName: Full=Uncharacterized protein {ECO:0000313|EnsemblPlants:HORVU3Hr1G088910.10};	Metalloendopeptidase family - saccharolysin & thimet oligopeptidase	GO:0005737,cytoplasm; GO:0046872,metal ion binding; GO:0004222,metalloendopeptidase activity; GO:0006518,peptide metabolic process	Peptidase family M3
TRINITY_DN10528_c0_g1_i2.path1	0.23	0.32	0.13	1.32	1.66	1.22	7	12	4	39	62	44	5.144	2.363	9.76605e-06	0.000148797	up	6D	208834984	208837796	-	TRINITY_DN10528_c0_g1_i2	--	K19600 tubby-related protein 1 | (RefSeq) tubby-like F-box protein 6 (A)	predicted protein [Hordeum vulgare subsp. vulgare]	RecName: Full=Tubby-like F-box protein 5; Short=OsTLP5; AltName: Full=Tubby-like F-box protein 8; Short=OsTLP8;	RecName: Full=Tubby-like F-box protein {ECO:0000256|RuleBase:RU361125};	Tub family proteins	GO:0035091,phosphatidylinositol binding	Tub family
TRINITY_DN105295_c0_g1_i1.path1	1.89	1.14	1.15	7.4	5.68	10.57	8	6	5	31	30	54	4.754	2.249	0.000119565	0.00131317	up	5C	602207753	602208020	-	TRINITY_DN105295_c0_g1_i1	--	--	--	--	--	--	--	--
TRINITY_DN10533_c0_g1_i4.path1	0.04	0.09	0.04	1.02	0.8	1.9	2	6	2	54	53	122	18.306	4.194	2.30113e-11	1.07945e-09	up	2D	434762696	434766067	+	TRINITY_DN10533_c0_g1_i4	--	K01537 Ca2+-transporting ATPase [EC:3.6.3.8] | (RefSeq) LOC109750849; putative calcium-transporting ATPase 13, plasma membrane-type (A)	putative calcium-transporting ATPase 13, plasma membrane-type [Aegilops tauschii subsp. tauschii]	RecName: Full=Calcium-transporting ATPase 7, plasma membrane-type {ECO:0000305}; Short=OsACA7 {ECO:0000303|PubMed:24286292}; EC=3.6.3.8 {ECO:0000305}; AltName: Full=Ca(2+)-ATPase isoform 7 {ECO:0000305};	RecName: Full=Calcium-transporting ATPase {ECO:0000256|RuleBase:RU361146}; EC=3.6.3.8 {ECO:0000256|RuleBase:RU361146};	Calcium transporting ATPase	GO:0000139,Golgi membrane; GO:0016021,integral component of membrane; GO:0005524,ATP binding; GO:0005388,calcium-transporting ATPase activity; GO:0005516,calmodulin binding; GO:0046872,metal ion binding	Cation transporting ATPase, C-terminus
TRINITY_DN105333_c0_g1_i1.path1	1.68	4.44	2.1	11.63	11.92	9.14	7	23	9	48	62	46	3.341	1.74	0.000348044	0.00327666	up	4A	299907701	299907964	-	TRINITY_DN105333_c0_g1_i1	--	--	--	--	--	--	--	--
TRINITY_DN105333_c0_g1_i1.path2	5.85	5.67	7.32	22.74	26.14	14.77	25	30	32	96	139	76	2.863	1.518	3.45928e-05	0.0004531	up	4D	297935722	297935991	-	TRINITY_DN105333_c0_g1_i1	--	--	--	--	--	--	--	--
TRINITY_DN10534_c0_g1_i5.path1	3.44	3.94	4.59	2.15	2.16	1.96	115	163	157	71	90	79	0.44	-1.184	8.53861e-06	0.000132215	down	3C	547719631	547725740	-	TRINITY_DN10534_c0_g1_i5	--	K14411 RNA-binding protein Musashi | (RefSeq) protein gar2 (A)	protein IQ-DOMAIN 31-like isoform X2 [Aegilops tauschii subsp. tauschii]	RecName: Full=Protein IQ-DOMAIN 31;	SubName: Full=Uncharacterized protein {ECO:0000313|EnsemblPlants:TRIAE_CS42_3AL_TGACv1_193835_AA0620490.1};	--	GO:0005829,cytosol; GO:0005875,microtubule associated complex; GO:0005886,plasma membrane	IQ calmodulin-binding motif
TRINITY_DN105360_c0_g1_i1.path1	6.12	6.53	11.11	4.2	3.69	4.54	28	37	52	19	21	25	0.436	-1.199	0.00810497	0.0430635	down	1A	502651230	502651518	-	TRINITY_DN105360_c0_g1_i1	--	--	--	--	--	--	--	--
TRINITY_DN105373_c0_g1_i1.path1	35.01	21.64	16.84	6.37	7.91	9.08	128	98	63	23	36	40	0.268	-1.899	1.23981e-07	2.93998e-06	down	1C	54420090	54420320	+	TRINITY_DN105373_c0_g1_i1	--	--	--	--	--	--	--	--
TRINITY_DN10538_c0_g1_i4.path1	16.54	19.61	13.43	61.89	50.07	42.58	171	251	142	632	644	530	2.645	1.403	2.39102e-10	9.45799e-09	up	4A	346576461	346577113	-	TRINITY_DN10538_c0_g1_i4	--	K11817 indole-3-acetaldehyde oxidase [EC:1.2.3.7] | (RefSeq) LOC109752661; probable aldehyde oxidase 2 (A)	probable aldehyde oxidase 2 [Aegilops tauschii subsp. tauschii]	RecName: Full=Indole-3-acetaldehyde oxidase; Short=IAA oxidase; EC=1.2.3.7; AltName: Full=Aldehyde oxidase-2; Short=ZmAO-2;	SubName: Full=Putative aldehyde oxidase 2 {ECO:0000313|EMBL:EMT00715.1, ECO:0000313|EnsemblPlants:EMT00715};	Xanthine dehydrogenase	GO:0005737,cytoplasm; GO:0051537,2 iron, 2 sulfur cluster binding; GO:0009055,electron transfer activity; GO:0071949,FAD binding; GO:0050302,indole-3-acetaldehyde oxidase activity; GO:0005506,iron ion binding; GO:0043546,molybdopterin cofactor binding; GO:0016614,oxidoreductase activity, acting on CH-OH group of donors; GO:0009688,abscisic acid biosynthetic process; GO:0009851,auxin biosynthetic …	--
TRINITY_DN10538_c0_g2_i1.path2	13.05	12.01	12.5	1.59	0.63	1.73	50	57	49	6	3	8	0.087	-3.527	3.33909e-11	1.52815e-09	down	4D	295103630	295103871	-	TRINITY_DN10538_c0_g2_i1	--	K11817 indole-3-acetaldehyde oxidase [EC:1.2.3.7] | (RefSeq) LOC109752661; probable aldehyde oxidase 2 (A)	probable aldehyde oxidase 2 [Aegilops tauschii subsp. tauschii]	RecName: Full=Probable aldehyde oxidase 1; Short=AO-1; EC=1.2.3.1;	SubName: Full=Uncharacterized protein {ECO:0000313|EnsemblPlants:HORVU5Hr1G103920.1};	--	GO:0005829,cytosol; GO:0051537,2 iron, 2 sulfur cluster binding; GO:0004031,aldehyde oxidase activity; GO:0009055,electron transfer activity; GO:0050660,flavin adenine dinucleotide binding; GO:0102797,geranial:oxygen oxidoreductase activity; GO:0102798,heptaldehyde:oxygen oxidoreductase activity; GO:0005506,iron ion binding; GO:0016614,oxidoreductase activity, acting on CH-OH group of donors; GO:…	--
TRINITY_DN105406_c0_g1_i1.path1	18.77	23.26	35.65	10.17	8.5	26.56	71	109	138	38	40	121	0.477	-1.068	0.00657561	0.0365679	down	5D	353290143	353290381	-	TRINITY_DN105406_c0_g1_i1	--	--	--	--	--	--	--	--
TRINITY_DN10541_c0_g1_i1.path3	1.29	0.47	1.15	5.82	5.28	7.61	11	5	10	49	56	78	5.435	2.442	9.09592e-07	1.80388e-05	up	5C	236096054	236106955	+	TRINITY_DN10541_c0_g1_i1	--	--	--	--	--	--	--	--
TRINITY_DN10542_c0_g1_i3.path1	0.16	0.38	0.34	0.87	1.59	1.42	8	24	18	44	101	87	3.689	1.883	1.60573e-05	0.000231538	up	6D	245858213	245866755	+	TRINITY_DN10542_c0_g1_i3	--	K00962 polyribonucleotide nucleotidyltransferase [EC:2.7.7.8] | (RefSeq) polyribonucleotide nucleotidyltransferase 2, mitochondrial (A)	hypothetical protein BRADI_3g48860v3 [Brachypodium distachyon]	RecName: Full=Polyribonucleotide nucleotidyltransferase 2, mitochondrial; EC=2.7.7.8; AltName: Full=Polynucleotide phosphorylase 2; Short=PNPase 2; Flags: Precursor;	SubName: Full=Uncharacterized protein {ECO:0000313|EMBL:KQK00360.1, ECO:0000313|EnsemblPlants:BRADI3G48860.1};	Predicted RNA-binding polyribonucleotide nucleotidyltransferase	GO:0005739,mitochondrion; GO:0004527,exonuclease activity; GO:0004654,polyribonucleotide nucleotidyltransferase activity; GO:0003723,RNA binding; GO:0006402,mRNA catabolic process; GO:0006397,mRNA processing; GO:0006364,rRNA processing; GO:0008033,tRNA processing	--
TRINITY_DN105441_c0_g1_i1.path1	10.28	19.36	9.3	283.32	329.52	208.57	54	126	50	1471	2155	1320	17.959	4.167	5.68579e-58	1.09495e-54	up	2D	492766179	492766677	+	TRINITY_DN105441_c0_g1_i1	--	K05337 ferredoxin | (RefSeq) hypothetical protein (A)	uncharacterized protein LOC109745074 [Aegilops tauschii subsp. tauschii]	RecName: Full=Chaperone protein dnaJ C76, chloroplastic {ECO:0000305}; Short=atDjC76 {ECO:0000303|PubMed:23894646}; AltName: Full=AtDjC17 {ECO:0000303|PubMed:25339971}; AltName: Full=AtJ17 {ECO:0000305}; Flags: Precursor;	SubName: Full=Uncharacterized protein {ECO:0000313|EnsemblPlants:TRIAE_CS42_7AS_TGACv1_571064_AA1844090.1};	Molecular chaperone (DnaJ superfamily)	GO:0009507,chloroplast	4Fe-4S single cluster domain of Ferredoxin I
TRINITY_DN105444_c0_g1_i1.path1	0.46	1.3	1.13	4.67	3.71	5.17	2	7	5	20	20	27	3.891	1.96	0.0057135	0.032662	up	3C	622184008	622184281	-	TRINITY_DN105444_c0_g1_i1	--	--	--	--	--	--	--	--
TRINITY_DN10552_c0_g1_i2.path1	0.19	0.33	0.31	0.92	0.7	0.88	9	19	15	43	41	50	2.53	1.339	0.00427673	0.0259315	up	5C	581347234	581354769	-	TRINITY_DN10552_c0_g1_i2	--	K02603 origin recognition complex subunit 1 | (RefSeq) origin of replication complex subunit 1 (A)	PREDICTED: origin of replication complex subunit 1 [Brachypodium distachyon]	RecName: Full=Origin of replication complex subunit 1 {ECO:0000303|PubMed:10996242}; Short=OsORC1 {ECO:0000303|PubMed:10996242};	SubName: Full=Uncharacterized protein {ECO:0000313|EMBL:KQK19227.1, ECO:0000313|EnsemblPlants:BRADI1G47050.1};	Origin recognition complex, subunit 1, and related proteins	GO:0005634,nucleus; GO:0005524,ATP binding; GO:0003682,chromatin binding; GO:0003677,DNA binding; GO:0046872,metal ion binding; GO:0006260,DNA replication; GO:0006355,regulation of transcription, DNA-templated; GO:0009744,response to sucrose; GO:0006351,transcription, DNA-templated	ATPase family associated with various cellular activities (AAA)
TRINITY_DN10553_c0_g1_i10.path1	0.3	0.59	0.42	1.47	1.35	2.09	9	22	13	44	51	76	3.136	1.649	0.000247353	0.00244874	up	5A	4608149	4613492	-	TRINITY_DN10553_c0_g1_i10	--	K01246 DNA-3-methyladenine glycosylase I [EC:3.2.2.20] | (RefSeq) uncharacterized protein LOC4331957 (A)	methyltransferase-like protein 2 isoform X2 [Aegilops tauschii subsp. tauschii]	RecName: Full=Methyltransferase-like protein 2; EC=2.1.1.-;	SubName: Full=Uncharacterized protein {ECO:0000313|EnsemblPlants:HORVU4Hr1G070650.49};	Transcriptional activator, adenine-specific DNA methyltransferase	GO:0005634,nucleus; GO:0003676,nucleic acid binding; GO:0009007,site-specific DNA-methyltransferase (adenine-specific) activity	--
TRINITY_DN105590_c0_g1_i1.path1	36.97	72.35	87.12	17.29	12.41	27.2	158	383	381	73	66	140	0.24	-2.06	1.01193e-10	4.23395e-09	down	6D	291138836	291139105	-	TRINITY_DN105590_c0_g1_i1	--	--	--	--	--	--	--	--
TRINITY_DN10560_c0_g1_i4.path1	1.44	1.29	0.57	3.18	3.34	3.1	27	30	11	59	78	70	2.466	1.302	0.00128333	0.009745	up	6A	402108085	402111029	+	TRINITY_DN10560_c0_g1_i4	--	K17428 large subunit ribosomal protein L47 | (RefSeq) 39S ribosomal protein L47, mitochondrial (A)	PREDICTED: 39S ribosomal protein L47, mitochondrial [Brachypodium distachyon]	--	SubName: Full=Uncharacterized protein {ECO:0000313|EMBL:KQK19665.1, ECO:0000313|EnsemblPlants:BRADI1G49670.1};	Mitochondrial/chloroplast ribosomal protein L4/L29	GO:0005762,mitochondrial large ribosomal subunit; GO:0003735,structural constituent of ribosome; GO:0032543,mitochondrial translation	Mitochondrial 39-S ribosomal protein L47 (MRP-L47)
TRINITY_DN105622_c0_g1_i1.path1	18.88	18.61	18.63	8.45	11.38	7.39	104	127	105	46	78	49	0.41	-1.285	1.63363e-05	0.000235098	down	1D	302707256	302707603	-	TRINITY_DN105622_c0_g1_i1	--	--	--	--	--	--	--	--
TRINITY_DN105622_c0_g1_i1.path2	12.53	10.41	9.05	6.06	7.29	5.43	69	71	51	33	50	36	0.497	-1.009	0.0040036	0.024585	down	Chr00	61782240	61782587	+	TRINITY_DN105622_c0_g1_i1	--	--	--	--	--	--	--	--
TRINITY_DN10564_c1_g1_i8.path1	2	2.35	1.33	0.67	1.06	1.52	91	132	62	30	60	83	0.481	-1.055	0.0018466	0.0131657	down	2C	244161436	244166446	-	TRINITY_DN10564_c1_g1_i8	--	--	hypothetical protein TRIUR3_24959 [Triticum urartu]	--	SubName: Full=Uncharacterized protein {ECO:0000313|EnsemblPlants:HORVU4Hr1G047800.1};	--	--	--
TRINITY_DN105640_c0_g1_i1.path1	11.53	14.47	11.47	118.6	90.38	80.82	54	84	55	549	527	456	6.536	2.708	1.85315e-28	5.00412e-26	up	2C	432385237	432385532	-	TRINITY_DN105640_c0_g1_i1	--	K00700 1,4-alpha-glucan branching enzyme [EC:2.4.1.18] | (RefSeq) 1,4-alpha-glucan-branching enzyme 2, chloroplastic/amyloplastic-like (A)	hypothetical protein OsJ_14706 [Oryza sativa Japonica Group]	RecName: Full=1,4-alpha-glucan-branching enzyme 1, chloroplastic/amyloplastic; EC=2.4.1.18; AltName: Full=Starch branching enzyme I; Flags: Precursor;	SubName: Full=Uncharacterized protein {ECO:0000313|EMBL:EEE60949.1};	1,4-alpha-glucan branching enzyme/starch branching enzyme II	GO:0009501,amyloplast; GO:0009507,chloroplast; GO:0003844,1,4-alpha-glucan branching enzyme activity; GO:0102752,1,4-alpha-glucan branching enzyme activity (using a glucosylated glycogenin as primer for glycogen synthesis); GO:0043169,cation binding; GO:0004553,hydrolase activity, hydrolyzing O-glycosyl compounds; GO:0009793,embryo development ending in seed dormancy; GO:0005978,glycogen biosynth…	--
TRINITY_DN105711_c0_g1_i1.path1	1.37	2.69	1.73	7.15	6.78	5.54	7	17	9	36	43	34	2.825	1.498	0.00400651	0.0245961	up	6C	221799259	221799580	+	TRINITY_DN105711_c0_g1_i1	--	--	--	--	--	--	--	--
TRINITY_DN10573_c0_g1_i5.path1	0.07	0.19	0.12	2.36	1.4	0.93	3	10	5	98	73	47	10.333	3.369	1.61837e-09	5.58634e-08	up	6A	311193278	311195927	+	TRINITY_DN10573_c0_g1_i5	--	K15333 tRNA guanosine-2'-O-methyltransferase [EC:2.1.1.34] | (RefSeq) uncharacterized protein LOC104224633 (A)	Subtilisin-like protease [Triticum urartu]	RecName: Full=Subtilisin-like protease SBT1.4 {ECO:0000303|PubMed:16193095}; EC=3.4.21.- {ECO:0000255|PROSITE-ProRule:PRU10082}; AltName: Full=Subtilase subfamily 1 member 4 {ECO:0000303|PubMed:16193095}; Short=AtSBT1.4 {ECO:0000303|PubMed:16193095}; Flags: Precursor;	SubName: Full=Subtilisin-like protease {ECO:0000313|EMBL:EMS50580.1, ECO:0000313|EnsemblPlants:TRIUR3_06802-P1};	--	GO:0048046,apoplast; GO:0009505,plant-type cell wall; GO:0005774,vacuolar membrane; GO:0005773,vacuole; GO:0004252,serine-type endopeptidase activity; GO:0010150,leaf senescence; GO:0010223,secondary shoot formation	--
TRINITY_DN105732_c0_g1_i1.path1	2.49	4.42	5.19	18.96	13.06	16.52	15	33	32	113	98	120	3.357	1.747	1.1784e-06	2.27291e-05	up	2C	559122765	559123145	+	TRINITY_DN105732_c0_g1_i1	--	--	predicted protein [Hordeum vulgare subsp. vulgare]	--	SubName: Full=Predicted protein {ECO:0000313|EMBL:BAK00831.1};	--	--	--
TRINITY_DN105759_c0_g1_i1.path1	4.57	2.87	1.49	0.77	0.2	0.21	18	14	6	3	1	1	0.108	-3.206	0.00153445	0.0112877	down	6C	557603170	557603418	-	TRINITY_DN105759_c0_g1_i1	--	--	--	--	--	--	--	--
TRINITY_DN10579_c0_g1_i6.path2	1.28	2.21	1.13	3.98	3.12	5.2	51	109	46	157	155	250	2.239	1.163	8.27831e-05	0.000960365	up	3A	364136002	364139653	-	TRINITY_DN10579_c0_g1_i6	--	K14326 regulator of nonsense transcripts 1 [EC:3.6.4.-] | (RefSeq) uncharacterized protein LOC111904613 (A)	uncharacterized protein LOC109777098 [Aegilops tauschii subsp. tauschii]	--	SubName: Full=Uncharacterized protein {ECO:0000313|EnsemblPlants:TRIAE_CS42_3B_TGACv1_224031_AA0791250.3};	--	GO:0003677,DNA binding; GO:0046983,protein dimerization activity	Protein of unknown function (DUF 659)
TRINITY_DN105858_c0_g1_i1.path2	1.57	2.54	1.54	14.32	7.58	12.53	5	10	5	45	30	48	5.076	2.344	4.2954e-05	0.000546097	up	7C	579439985	579440185	+	TRINITY_DN105858_c0_g1_i1	--	--	--	--	--	--	--	--
TRINITY_DN105883_c0_g1_i1.path1	11.61	10.31	8.85	6.11	4.29	4.05	50	55	39	26	23	21	0.394	-1.343	0.00102655	0.00810292	down	2A	334502787	334503058	+	TRINITY_DN105883_c0_g1_i1	--	--	--	--	--	--	--	--
TRINITY_DN105904_c0_g1_i1.path2	16.79	21.31	12.24	5.67	5.78	10.4	63	99	47	21	27	47	0.365	-1.455	0.000111341	0.00123527	down	1D	461069396	461069632	+	TRINITY_DN105904_c0_g1_i1	--	--	--	--	--	--	--	--
TRINITY_DN105966_c0_g1_i1.path1	6.68	7.6	8.31	24.59	21.72	20.93	22	31	28	80	89	83	2.504	1.324	0.000175443	0.00182576	up	4D	346015006	346015213	-	TRINITY_DN105966_c0_g1_i1	--	--	--	--	--	--	--	--
TRINITY_DN10597_c0_g1_i3.path1	0	0.08	0.05	6.07	2.55	7.83	0	2	1	119	63	187	99.413	6.635	8.71434e-13	5.08869e-11	up	6A	234267635	234270269	+	TRINITY_DN10597_c0_g1_i3	--	K14638 solute carrier family 15 (peptide/histidine transporter), member 3/4 | (RefSeq) LOC109748183; protein NRT1/ PTR FAMILY 7.3-like (A)	protein NRT1/ PTR FAMILY 7.3-like [Aegilops tauschii subsp. tauschii]	RecName: Full=Protein NRT1/ PTR FAMILY 7.2; Short=AtNPF7.2; AltName: Full=Nitrate transporter 1.8;	SubName: Full=Uncharacterized protein {ECO:0000313|EnsemblPlants:TRIAE_CS42_6AL_TGACv1_472741_AA1525480.1};	H+/oligopeptide symporter	GO:0016021,integral component of membrane; GO:0005886,plasma membrane; GO:0015112,nitrate transmembrane transporter activity; GO:0015293,symporter activity; GO:0042128,nitrate assimilation; GO:0046686,response to cadmium ion; GO:0010167,response to nitrate	POT family
TRINITY_DN10597_c0_g1_i3.path2	0.25	0.2	0.25	5.97	3.56	10.92	5	5	5	117	88	261	24.283	4.602	1.66013e-18	1.96899e-16	up	6C	113568392	113571512	-	TRINITY_DN10597_c0_g1_i3	--	K14638 solute carrier family 15 (peptide/histidine transporter), member 3/4 | (RefSeq) LOC109748183; protein NRT1/ PTR FAMILY 7.3-like (A)	protein NRT1/ PTR FAMILY 7.3-like [Aegilops tauschii subsp. tauschii]	RecName: Full=Protein NRT1/ PTR FAMILY 7.2; Short=AtNPF7.2; AltName: Full=Nitrate transporter 1.8;	SubName: Full=Uncharacterized protein {ECO:0000313|EnsemblPlants:TRIAE_CS42_6AL_TGACv1_472741_AA1525480.1};	H+/oligopeptide symporter	GO:0016021,integral component of membrane; GO:0005886,plasma membrane; GO:0015112,nitrate transmembrane transporter activity; GO:0015293,symporter activity; GO:0042128,nitrate assimilation; GO:0046686,response to cadmium ion; GO:0010167,response to nitrate	POT family
TRINITY_DN105973_c0_g1_i1.path1	2.82	1.59	2.21	0.29	0.45	0	10	7	8	1	2	0	0.095	-3.402	0.00619465	0.0348519	down	6C	415653416	415672335	-	TRINITY_DN105973_c0_g1_i1	--	--	--	--	--	--	--	--
TRINITY_DN105992_c0_g1_i1.path3	93.35	98.37	99.23	4.28	14.73	11.24	331	432	360	15	65	48	0.088	-3.499	3.2e-32	1.18269e-29	down	7D	403072716	403163004	+	TRINITY_DN105992_c0_g1_i1	--	--	--	--	--	--	--	--
TRINITY_DN106061_c0_g1_i1.path1	283.33	195.86	149.14	36.26	60.44	64.04	1036	887	558	131	275	282	0.215	-2.217	1.09758e-18	1.31456e-16	down	4D	377054417	377054647	-	TRINITY_DN106061_c0_g1_i1	--	--	--	--	--	--	--	--
TRINITY_DN106064_c0_g1_i1.path1	129.86	343.12	348.15	843.4	694.51	717.67	444	1453	1218	2849	2955	2955	2.315	1.211	0.0063868	0.0357215	up	1D	407093534	407093749	+	TRINITY_DN106064_c0_g1_i1	--	--	--	--	--	--	--	--
TRINITY_DN10612_c0_g1_i14.path1	1.6	1.4	2.02	3.99	2.53	5.7	109	118	141	269	215	469	2.017	1.013	0.000336154	0.00318192	up	4C	216769207	216774326	+	TRINITY_DN10612_c0_g1_i14	--	--	hypothetical protein BRADI_2g25687v3 [Brachypodium distachyon]	--	--	--	--	--
TRINITY_DN10613_c0_g2_i1.path1	1.5	1.76	2.4	7.73	4.28	6.12	11	16	18	56	39	54	2.677	1.421	0.00232366	0.0158845	up	4A	405171773	405172235	+	TRINITY_DN10613_c0_g2_i1	--	K14638 solute carrier family 15 (peptide/histidine transporter), member 3/4 | (RefSeq) LOC109743876; protein NRT1/ PTR FAMILY 5.10-like (A)	predicted protein [Hordeum vulgare subsp. vulgare]	RecName: Full=Protein NRT1/ PTR FAMILY 5.10; Short=AtNPF5.10;	SubName: Full=Putative proton-dependent oligopeptide or low-affinity nitrate transporter {ECO:0000313|EMBL:CCJ47225.1}; Flags: Fragment;	H+/oligopeptide symporter	GO:0016021,integral component of membrane; GO:0022857,transmembrane transporter activity; GO:0006857,oligopeptide transport	--
TRINITY_DN10613_c1_g1_i1.path1	0.47	0.57	0.46	5.73	3.41	4.89	2	3	2	24	18	25	7.804	2.964	0.000320689	0.0030537	up	4A	405170547	405170917	+	TRINITY_DN10613_c1_g1_i1	--	K14638 solute carrier family 15 (peptide/histidine transporter), member 3/4 | (RefSeq) LOC109743876; protein NRT1/ PTR FAMILY 5.10-like (A)	unnamed protein product [Triticum aestivum]	RecName: Full=Protein NRT1/ PTR FAMILY 5.13; Short=AtNPF5.13; AltName: Full=Nitrate transporter 1.16;	SubName: Full=Uncharacterized protein {ECO:0000313|EnsemblPlants:HORVU3Hr1G082460.7};	H+/oligopeptide symporter	GO:0016021,integral component of membrane; GO:0022857,transmembrane transporter activity; GO:0006857,oligopeptide transport	POT family
TRINITY_DN10613_c2_g1_i1.path1	3.09	2.71	3.15	11.02	8.21	6.03	23	25	24	81	76	54	2.384	1.253	0.00174282	0.0125345	up	1D	331376852	331377321	-	TRINITY_DN10613_c2_g1_i1	--	--	--	--	--	--	--	--
TRINITY_DN10616_c0_g2_i1.path1	2.28	1.64	2.26	8.47	7.66	6.5	64	57	65	235	268	220	3.091	1.628	1.78178e-09	6.11007e-08	up	3D	367149082	367150856	-	TRINITY_DN10616_c0_g2_i1	--	K20665 jasmonoyl-L-amino acid 12-hydroxylase [EC:1.14.14.48] | (RefSeq) cytochrome P450 94B3-like (A)	cytochrome P450 94B3-like [Aegilops tauschii subsp. tauschii]	RecName: Full=Cytochrome P450 94C1 {ECO:0000305}; EC=1.14.14.49 {ECO:0000269|PubMed:22215670, ECO:0000269|PubMed:26164240}; AltName: Full=12-hydroxyjasmonoyl-L-amino acid 12-hydroxylase {ECO:0000303|PubMed:22215670};	SubName: Full=Uncharacterized protein {ECO:0000313|EnsemblPlants:TRIAE_CS42_3AL_TGACv1_196255_AA0658840.1};	Cytochrome P450 CYP4/CYP19/CYP26 subfamilies	GO:0005789,endoplasmic reticulum membrane; GO:0016021,integral component of membrane; GO:0043231,intracellular membrane-bounded organelle; GO:0018685,alkane 1-monooxygenase activity; GO:0020037,heme binding; GO:0005506,iron ion binding; GO:0009611,response to wounding	Cytochrome P450
TRINITY_DN10616_c0_g2_i1.path2	0	0	0	0.82	1.22	0.82	0	0	0	23	43	28	134.49	7.071	8.44282e-08	2.07189e-06	up	4A	373149844	373151632	-	TRINITY_DN10616_c0_g2_i1	--	--	--	--	--	--	--	--
TRINITY_DN106160_c0_g1_i1.path2	2.6	3.63	6.24	1.44	1.33	1.38	11	19	27	6	7	7	0.277	-1.854	0.00597872	0.033874	down	5D	22338604	22338870	-	TRINITY_DN106160_c0_g1_i1	--	--	--	--	--	--	--	--
TRINITY_DN106173_c0_g1_i1.path1	2.12	2.71	3.11	7.7	8.11	6.76	12	19	18	43	57	46	2.39	1.257	0.00468038	0.0278641	up	1D	362558748	362559204	+	TRINITY_DN106173_c0_g1_i1	--	--	uncharacterized protein LOC109760183 isoform X2 [Aegilops tauschii subsp. tauschii]	--	SubName: Full=Uncharacterized protein {ECO:0000313|EnsemblPlants:TRIAE_CS42_5DL_TGACv1_435270_AA1448130.1};	--	--	--
TRINITY_DN106174_c0_g1_i1.path1	7.08	10.2	11.61	2.05	3.86	2.31	28	50	47	8	19	11	0.241	-2.052	3.11086e-05	0.000413383	down	Chr00	61295866	61296115	-	TRINITY_DN106174_c0_g1_i1	--	--	--	--	--	--	--	--
TRINITY_DN106204_c0_g1_i1.path1	19.34	15.03	8.85	6.94	5.31	12	79	76	37	28	27	59	0.469	-1.091	0.00649276	0.036203	down	1C	100475442	100475699	-	TRINITY_DN106204_c0_g1_i1	--	K16578 CLIP-associating protein 1/2 | (RefSeq) CLIP-associated protein-like (A)	uncharacterized protein LOC109766200 [Aegilops tauschii subsp. tauschii]	RecName: Full=Putative ribonuclease H protein At1g65750; EC=3.1.26.4;	SubName: Full=Uncharacterized protein {ECO:0000313|EnsemblPlants:TRIAE_CS42_6DL_TGACv1_526396_AA1682230.1};	FOG: Reverse transcriptase	GO:0046872,metal ion binding; GO:0003676,nucleic acid binding; GO:0004523,RNA-DNA hybrid ribonuclease activity	--
TRINITY_DN106240_c0_g1_i1.path1	49.72	71.85	48.32	152.91	188.72	112.45	181	324	180	550	855	493	2.278	1.188	7.88608e-07	1.58412e-05	up	6C	587321614	587322324	-	TRINITY_DN106240_c0_g1_i1	--	--	--	--	--	--	--	--
TRINITY_DN106256_c0_g1_i1.path1	4.28	3.45	2.46	8.92	8.09	12.33	17	17	10	35	40	59	2.416	1.273	0.00664386	0.0368896	up	1D	449260295	449260545	-	TRINITY_DN106256_c0_g1_i1	--	--	--	--	--	--	--	--
TRINITY_DN106260_c0_g1_i1.path1	0.84	2.49	1.37	75.88	38.36	32.64	3	11	5	267	170	140	25.964	4.698	4.57667e-22	7.37701e-20	up	7C	692406818	692407042	+	TRINITY_DN106260_c0_g1_i1	--	--	--	--	--	--	--	--
TRINITY_DN106369_c0_g1_i1.path1	26.14	17.44	14.9	6.8	8.9	8.74	144	119	84	37	61	58	0.353	-1.504	1.63882e-06	3.04786e-05	down	6C	436828410	436828757	-	TRINITY_DN106369_c0_g1_i1	--	--	--	--	--	--	--	--
TRINITY_DN10644_c0_g1_i2.path1	0	0	0	1.82	0.64	1.85	0	0	0	25	11	31	97.664	6.61	1.79461e-06	3.31135e-05	up	5D	149497937	149498813	+	TRINITY_DN10644_c0_g1_i2	--	--	uncharacterized protein LOC109767758 [Aegilops tauschii subsp. tauschii]	--	SubName: Full=Uncharacterized protein {ECO:0000313|EMBL:EMT31811.1, ECO:0000313|EnsemblPlants:EMT31811};	--	--	--
TRINITY_DN10645_c0_g1_i1.path1	3.9	4.96	4.73	22.95	20.97	29.91	33	52	41	192	221	305	4.542	2.183	5.02261e-16	4.62326e-14	up	4C	502980627	502981283	-	TRINITY_DN10645_c0_g1_i1	--	--	predicted protein [Hordeum vulgare subsp. vulgare]	--	SubName: Full=Predicted protein {ECO:0000313|EMBL:BAJ95445.1};	--	--	--
TRINITY_DN106452_c0_g1_i1.path1	0	0	0	1.08	0.11	2.24	0	0	0	23	3	58	118.252	6.886	0.000636772	0.00544691	up	3C	583821251	583822607	+	TRINITY_DN106452_c0_g1_i1	--	--	--	--	--	--	--	--
TRINITY_DN10647_c0_g1_i1.path1	1.08	1.38	1.7	4.85	4.18	5.81	44	70	71	196	213	286	2.983	1.577	3.38651e-09	1.09996e-07	up	2A	397110183	397117075	+	TRINITY_DN10647_c0_g1_i1	--	--	--	--	--	--	--	--
TRINITY_DN106470_c0_g1_i1.path2	74.46	64.75	77.58	44.22	40.55	36.79	363	391	387	213	246	216	0.471	-1.087	2.20288e-07	4.97699e-06	down	5D	21794436	21794856	-	TRINITY_DN106470_c0_g1_i1	--	--	--	--	--	--	--	--
TRINITY_DN106496_c0_g1_i1.path1	1.37	2.25	0.94	4.16	2.86	4.29	30	61	21	90	78	113	2.086	1.061	0.0033631	0.021397	up	5C	554041613	554042995	-	TRINITY_DN106496_c0_g1_i1	--	--	--	--	--	--	--	--
TRINITY_DN106513_c0_g1_i1.path1	4.72	4.52	4.89	17.9	8.03	10.22	86	102	91	322	182	224	2.153	1.106	0.000234517	0.00233875	up	5A	431185050	431186199	+	TRINITY_DN106513_c0_g1_i1	--	--	--	--	--	--	--	--
TRINITY_DN106569_c0_g1_i1.path1	4.26	5.24	5.07	2.06	1.49	2.38	46	70	56	22	20	31	0.34	-1.555	5.53936e-05	0.000680485	down	1C	328444056	328444737	+	TRINITY_DN106569_c0_g1_i1	--	--	--	--	--	--	--	--
TRINITY_DN106574_c0_g1_i1.path1	2.92	2.17	2.69	1.57	1.47	1.47	51	47	48	27	32	31	0.487	-1.039	0.0069794	0.0383241	down	6A	423035038	423036140	+	TRINITY_DN106574_c0_g1_i1	--	--	--	--	--	--	--	--
TRINITY_DN10658_c0_g1_i1.path1	28.77	31.56	25.37	108.26	72.88	63.63	92	125	83	342	290	245	2.418	1.274	1.33154e-06	2.53687e-05	up	5C	522317297	522317498	+	TRINITY_DN10658_c0_g1_i1	--	--	--	--	--	--	--	--
TRINITY_DN106594_c0_g1_i1.path1	0.76	5.89	0.98	21.65	18	24.04	3	29	4	85	89	115	6.927	2.792	4.28486e-08	1.10877e-06	up	4C	454409595	454409845	+	TRINITY_DN106594_c0_g1_i1	--	--	--	--	--	--	--	--
TRINITY_DN106615_c0_g1_i1.path1	12.72	8.75	15.3	0.81	1.08	0.44	95	81	117	6	10	4	0.053	-4.233	7.77966e-19	9.5043e-17	down	1A	433838552	433839023	+	TRINITY_DN106615_c0_g1_i1	--	--	--	--	--	--	--	--
TRINITY_DN106617_c0_g1_i1.path1	0.13	0.32	0.32	2.12	1	1.19	2	6	5	32	19	22	4.691	2.23	0.00196786	0.0138761	up	7A	410160845	410161810	-	TRINITY_DN106617_c0_g1_i1	--	--	--	--	--	--	--	--
TRINITY_DN10665_c0_g1_i2.path1	2.52	4.11	5.22	1	0.69	0.96	59	119	125	23	20	27	0.185	-2.433	1.10798e-10	4.60688e-09	down	4A	266975978	266977564	-	TRINITY_DN10665_c0_g1_i2	--	K12817 pre-mRNA-splicing factor 18 | (RefSeq) pre-mRNA-splicing factor 18 (A)	hypothetical protein PAHAL_I02121 [Panicum hallii]	--	SubName: Full=Uncharacterized protein {ECO:0000313|EMBL:KQK13656.1, ECO:0000313|EnsemblPlants:BRADI1G11630.1};	U5 snRNP-associated RNA splicing factor	GO:0071021,U2-type post-spliceosomal complex; GO:0046540,U4/U6 x U5 tri-snRNP complex; GO:0005682,U5 snRNP; GO:0000350,generation of catalytic spliceosome for second transesterification step; GO:0071048,nuclear retention of unspliced pre-mRNA at the site of transcription	Prp18 domain
TRINITY_DN106654_c0_g1_i1.path1	68.02	59.89	61.31	27.63	24.06	25.59	309	337	285	124	136	140	0.343	-1.545	3.25391e-13	2.02826e-11	down	3D	456251533	456252361	+	TRINITY_DN106654_c0_g1_i1	--	--	--	--	--	--	--	--
TRINITY_DN106655_c0_g1_i1.path1	3.48	1.98	6.79	1.03	1.48	1.53	17	12	34	5	9	9	0.274	-1.865	0.00546567	0.0315112	down	5C	30638223	30638531	+	TRINITY_DN106655_c0_g1_i1	--	--	retrotransposon protein, putative, unclassified [Oryza sativa Japonica Group]	--	SubName: Full=Uncharacterized protein {ECO:0000313|EnsemblPlants:TRIAE_CS42_6AL_TGACv1_473058_AA1528330.1};	--	--	--
TRINITY_DN106660_c0_g1_i1.path1	5.59	5.3	13.18	1.48	3.71	3.33	46	54	111	12	38	33	0.295	-1.763	0.00011698	0.00128884	down	4A	402103473	402104240	+	TRINITY_DN106660_c0_g1_i1	--	--	unnamed protein product [Triticum aestivum]	--	SubName: Full=Uncharacterized protein {ECO:0000313|EMBL:CDM85095.1, ECO:0000313|EnsemblPlants:TRIAE_CS42_3B_TGACv1_221162_AA0732340.1};	--	GO:0009570,chloroplast stroma; GO:0009535,chloroplast thylakoid membrane	--
TRINITY_DN106660_c0_g1_i1.path2	31.59	33.25	65.66	12.42	14.84	12.01	260	339	553	101	152	119	0.251	-1.997	1.06087e-11	5.27758e-10	down	4D	328931078	328931852	+	TRINITY_DN106660_c0_g1_i1	--	--	unnamed protein product [Triticum aestivum]	--	SubName: Full=Uncharacterized protein {ECO:0000313|EMBL:CDM85095.1, ECO:0000313|EnsemblPlants:TRIAE_CS42_3B_TGACv1_221162_AA0732340.1};	--	GO:0009570,chloroplast stroma; GO:0009535,chloroplast thylakoid membrane	--
TRINITY_DN106669_c0_g1_i1.path1	0.33	0.67	1.63	5.07	7.39	2.78	2	5	10	30	55	20	4.894	2.291	0.00067848	0.00574592	up	6C	99973443	99973905	+	TRINITY_DN106669_c0_g1_i1	--	--	predicted protein [Hordeum vulgare subsp. vulgare]	RecName: Full=Transcription factor bHLH63; AltName: Full=Basic helix-loop-helix protein 63; Short=AtbHLH63; Short=bHLH 63; AltName: Full=Protein CRYPTOCHROME INTERACTING BASIC-HELIX-LOOP-HELIX 1; AltName: Full=Transcription factor EN 84; AltName: Full=bHLH transcription factor bHLH063;	SubName: Full=Uncharacterized protein {ECO:0000313|EnsemblPlants:HORVU6Hr1G068980.10};	--	GO:0005634,nucleus; GO:0003677,DNA binding; GO:0003700,DNA-binding transcription factor activity; GO:0046983,protein dimerization activity; GO:0009908,flower development; GO:0009911,positive regulation of flower development; GO:0009637,response to blue light; GO:0006351,transcription, DNA-templated	--
TRINITY_DN106690_c0_g1_i1.path1	31.06	36.26	22.77	8.07	13.16	17.78	148	214	111	38	78	102	0.365	-1.455	9.58316e-07	1.88873e-05	down	6A	398657494	398657794	-	TRINITY_DN106690_c0_g1_i1	--	--	--	--	--	--	--	--
TRINITY_DN106704_c0_g1_i1.path1	20.38	19.98	17.82	6.54	6.82	10.3	322	391	288	102	134	196	0.34	-1.555	1.37731e-12	7.8314e-11	down	4D	338661357	338662595	-	TRINITY_DN106704_c0_g1_i1	--	K14509 ethylene receptor [EC:2.7.13.-] | (RefSeq) ethylene receptor 3 (A)	hypothetical protein BRADI_2g37383v3, partial [Brachypodium distachyon]	RecName: Full=Protein FAR1-RELATED SEQUENCE 11;	SubName: Full=Uncharacterized protein {ECO:0000313|EMBL:KQK07741.1};	--	GO:0005634,nucleus; GO:0008270,zinc ion binding; GO:0006355,regulation of transcription, DNA-templated	--
TRINITY_DN106709_c0_g1_i1.path1	8.96	7.67	2.11	2.73	1.74	1.35	83	88	20	25	20	15	0.264	-1.923	0.000105062	0.00117486	down	3A	610213	610797	+	TRINITY_DN106709_c0_g1_i1	--	--	--	--	--	--	--	--
TRINITY_DN10671_c0_g1_i2.path3	0.46	0.6	0.54	2.01	1.15	1.61	10	16	12	43	31	42	2.496	1.319	0.00830251	0.0438837	up	3D	438294533	438300552	+	TRINITY_DN10671_c0_g1_i2	--	K09510 DnaJ homolog subfamily B member 4 | (RefSeq) LOC109736603; dnaJ homolog subfamily B member 13-like (A)	dnaJ homolog subfamily B member 13-like [Aegilops tauschii subsp. tauschii]	RecName: Full=DnaJ protein ERDJ3B; AltName: Full=Chaperone protein dnaJ 19; Short=AtDjB19; Short=AtJ19; AltName: Full=Endoplasmic reticulum dnaJ domain-containing protein 3B; Short=AtERdj3B; AltName: Full=Protein SCJ1 homolog ERDJ3B; Flags: Precursor;	SubName: Full=Uncharacterized protein {ECO:0000313|EnsemblPlants:TRIAE_CS42_1DS_TGACv1_080822_AA0254130.1};	Molecular chaperone (DnaJ superfamily)	GO:0005783,endoplasmic reticulum; GO:0005788,endoplasmic reticulum lumen; GO:0005886,plasma membrane; GO:0051082,unfolded protein binding; GO:0052033,pathogen-associated molecular pattern dependent induction by symbiont of host innate immune response; GO:0006457,protein folding	DnaJ C terminal domain
TRINITY_DN106714_c0_g1_i1.path1	11.67	9.57	7.79	18	34.24	38.92	63	64	43	96	230	253	2.635	1.398	7.94961e-06	0.000124365	up	2A	379001664	379002004	+	TRINITY_DN106714_c0_g1_i1	--	--	--	--	--	--	--	--
TRINITY_DN106762_c0_g1_i1.path1	8.46	12.85	9.72	27.02	29.45	21.07	51	96	60	161	221	153	2.115	1.081	0.000115696	0.001277	up	7C	469739681	469740151	-	TRINITY_DN106762_c0_g1_i1	--	K09647 mitochondrial inner membrane protease subunit 1 [EC:3.4.21.-] | (RefSeq) LOC109761425; mitochondrial inner membrane protease subunit 1 (A)	mitochondrial inner membrane protease subunit 1 [Aegilops tauschii subsp. tauschii]	--	SubName: Full=Uncharacterized protein {ECO:0000313|EnsemblPlants:TRIAE_CS42_6AS_TGACv1_486914_AA1566450.1};	Mitochondrial inner membrane protease, subunit IMP1	GO:0016020,membrane; GO:0008236,serine-type peptidase activity	Peptidase S24-like
TRINITY_DN106777_c0_g1_i1.path1	28.82	37.23	27.72	103.15	69.48	62.42	125	200	123	442	375	326	2.124	1.087	1.21355e-05	0.000180685	up	5D	18638801	18639074	-	TRINITY_DN106777_c0_g1_i1	--	--	Uncharacterized protein TCM_026785 [Theobroma cacao]	--	SubName: Full=Uncharacterized protein {ECO:0000313|EMBL:EOY11684.1};	--	GO:0016021,integral component of membrane	--
TRINITY_DN106777_c0_g1_i1.path2	23.06	26.99	22.98	86.11	71.15	50.54	100	145	102	369	384	264	2.413	1.271	6.23954e-07	1.28044e-05	up	5A	48526517	48526790	-	TRINITY_DN106777_c0_g1_i1	--	--	Uncharacterized protein TCM_026785 [Theobroma cacao]	--	SubName: Full=Uncharacterized protein {ECO:0000313|EMBL:EOY11684.1};	--	GO:0016021,integral component of membrane	--
TRINITY_DN10679_c0_g2_i1.path1	10.72	10.72	6.74	4.39	4.82	4.45	84	104	54	34	47	42	0.41	-1.285	0.000110845	0.00123089	down	6A	55622691	55623295	+	TRINITY_DN10679_c0_g2_i1	--	--	--	--	--	--	--	--
TRINITY_DN1068_c2_g1_i1.path1	0.96	1.12	1.26	0.11	0	0.27	9	13	12	1	0	3	0.093	-3.433	0.00166168	0.0120599	down	7C	581308842	581310110	+	TRINITY_DN1068_c2_g1_i1	--	K12309 beta-galactosidase [EC:3.2.1.23] | (RefSeq) beta-galactosidase 2 (A)	Beta-galactosidase [Zea mays]	RecName: Full=Beta-galactosidase 9; Short=Lactase 9; EC=3.2.1.23; Flags: Precursor;	SubName: Full=Beta-galactosidase {ECO:0000313|EMBL:AQL04121.1};	Beta-galactosidase	GO:0048046,apoplast; GO:0005618,cell wall; GO:0005773,vacuole; GO:0004565,beta-galactosidase activity; GO:0005975,carbohydrate metabolic process	--
TRINITY_DN1068_c2_g1_i1.path2	3	3.98	4.5	1.52	0.43	2.31	28	46	43	14	5	26	0.306	-1.71	0.00125548	0.00957927	down	7D	398719180	398720369	+	TRINITY_DN1068_c2_g1_i1	--	K12309 beta-galactosidase [EC:3.2.1.23] | (RefSeq) beta-galactosidase 2 (A)	PREDICTED: beta-galactosidase 9 [Brachypodium distachyon]	RecName: Full=Beta-galactosidase 9; Short=Lactase 9; EC=3.2.1.23; Flags: Precursor;	RecName: Full=Beta-galactosidase {ECO:0000256|RuleBase:RU000675}; EC=3.2.1.23 {ECO:0000256|RuleBase:RU000675};	Beta-galactosidase	GO:0048046,apoplast; GO:0005618,cell wall; GO:0005773,vacuole; GO:0004565,beta-galactosidase activity; GO:0005975,carbohydrate metabolic process	--
TRINITY_DN10681_c0_g1_i1.path1	3.39	1.29	2.14	9.08	4.96	8.11	17	8	11	45	31	49	2.733	1.451	0.0056147	0.0322106	up	3D	432408101	432408417	-	TRINITY_DN10681_c0_g1_i1	--	--	--	--	--	--	--	--
TRINITY_DN10682_c0_g1_i1.path2	0.19	0.38	0.28	0.63	0.9	0.99	10	25	15	33	59	63	2.486	1.314	0.00370926	0.0231565	up	7A	317089802	317102450	+	TRINITY_DN10682_c0_g1_i1	--	K18626 trichohyalin | (RefSeq) uncharacterized protein LOC107963072 (A)	DnaJ homolog subfamily B member 14 [Triticum urartu]	RecName: Full=DnaJ protein P58IPK homolog B {ECO:0000305}; Short=OsP58B {ECO:0000303|PubMed:24153418}; AltName: Full=Chaperone protein dnaJ C15 {ECO:0000305}; Short=OsDjC15 {ECO:0000303|PubMed:23160806}; Flags: Precursor;	SubName: Full=Uncharacterized protein {ECO:0000313|EnsemblPlants:TRIAE_CS42_4BS_TGACv1_328836_AA1094290.2};	--	GO:0005788,endoplasmic reticulum lumen	Domain of unknown function (DUF3444)
TRINITY_DN106829_c0_g1_i1.path1	4.16	6.94	11.37	20.47	23.16	15.88	15	31	42	73	104	69	2.226	1.155	0.00442583	0.0266413	up	4C	123058972	123059199	+	TRINITY_DN106829_c0_g1_i1	--	--	--	--	--	--	--	--
TRINITY_DN10683_c0_g1_i10.path3	0.94	0.67	1.29	2.78	1.86	2.95	33	29	46	96	81	124	2.18	1.125	0.00168214	0.0121744	up	2A	351602827	351605033	-	TRINITY_DN10683_c0_g1_i10	--	--	--	--	--	--	--	--
TRINITY_DN106859_c0_g1_i1.path1	1.48	0.56	1.02	0.18	0.14	0.29	17	8	12	2	2	4	0.165	-2.602	0.00396245	0.0243794	down	7C	459762806	459763530	-	TRINITY_DN106859_c0_g1_i1	--	--	hypothetical protein TRIUR3_07640 [Triticum urartu]	--	SubName: Full=Uncharacterized protein {ECO:0000313|EnsemblPlants:TRIAE_CS42_7AS_TGACv1_569641_AA1820980.1};	--	--	--
TRINITY_DN10693_c0_g1_i1.path1	0.86	0.76	0.55	11.53	2.49	23.12	20	22	13	265	72	648	14.072	3.815	4.42307e-06	7.36631e-05	up	3D	332874961	332880229	-	TRINITY_DN10693_c0_g1_i1	--	K14664 IAA-amino acid hydrolase [EC:3.5.1.-] | (RefSeq) LOC109751618; IAA-amino acid hydrolase ILR1-like 2 (A)	IAA-amino acid hydrolase ILR1-like 2 [Aegilops tauschii subsp. tauschii]	RecName: Full=IAA-amino acid hydrolase ILR1-like 2; EC=3.5.1.-; Flags: Precursor;	SubName: Full=Uncharacterized protein {ECO:0000313|EnsemblPlants:HORVU3Hr1G066450.8};	--	GO:0005788,endoplasmic reticulum lumen; GO:0016787,hydrolase activity; GO:0008152,metabolic process	Peptidase family M20/M25/M40
TRINITY_DN10693_c0_g1_i1.path2	0.3	0.48	0.63	2.34	0.55	4.94	7	14	15	54	16	139	4.528	2.179	0.000291193	0.00280939	up	3A	29425096	29428400	+	TRINITY_DN10693_c0_g1_i1	--	K14664 IAA-amino acid hydrolase [EC:3.5.1.-] | (RefSeq) LOC109751618; IAA-amino acid hydrolase ILR1-like 2 (A)	IAA-amino acid hydrolase ILR1-like 2 [Aegilops tauschii subsp. tauschii]	RecName: Full=IAA-amino acid hydrolase ILR1-like 2; EC=3.5.1.-; Flags: Precursor;	SubName: Full=Uncharacterized protein {ECO:0000313|EnsemblPlants:HORVU3Hr1G066450.8};	--	GO:0005788,endoplasmic reticulum lumen; GO:0016787,hydrolase activity; GO:0008152,metabolic process	Peptidase family M20/M25/M40
TRINITY_DN10694_c0_g1_i3.path1	2.48	4.23	2.72	24.94	24.21	22.99	104	220	117	1034	1264	1162	6.461	2.692	1.77364e-38	9.90787e-36	up	2C	28224548	28230678	-	TRINITY_DN10694_c0_g1_i3	--	K04733 interleukin-1 receptor-associated kinase 4 [EC:2.7.11.1] | (RefSeq) protein STRUBBELIG-RECEPTOR FAMILY 6-like (A)	PREDICTED: protein STRUBBELIG-RECEPTOR FAMILY 7 isoform X2 [Brachypodium distachyon]	RecName: Full=Protein STRUBBELIG-RECEPTOR FAMILY 7; AltName: Full=Leucine-rich repeat receptor kinase-like protein SRF7; Flags: Precursor;	SubName: Full=Uncharacterized protein {ECO:0000313|EMBL:KQK15154.1, ECO:0000313|EnsemblPlants:BRADI1G21040.1};	--	GO:0005829,cytosol; GO:0016021,integral component of membrane; GO:0005634,nucleus; GO:0005886,plasma membrane; GO:0005524,ATP binding; GO:0004675,transmembrane receptor protein serine/threonine kinase activity; GO:0007166,cell surface receptor signaling pathway; GO:0006468,protein phosphorylation	Protein kinase domain
TRINITY_DN10695_c0_g2_i3.path1	10.6	11.49	11.48	4.94	7.45	5.12	239	321	265	110	209	139	0.441	-1.182	6.12898e-07	1.25951e-05	down	2D	307747835	307753481	+	TRINITY_DN10695_c0_g2_i3	--	K01082 3'(2'), 5'-bisphosphate nucleotidase [EC:3.1.3.7] | (RefSeq) LOC109764221; putative PAP-specific phosphatase, mitochondrial (A)	putative PAP-specific phosphatase, mitochondrial [Aegilops tauschii subsp. tauschii]	RecName: Full=Putative PAP-specific phosphatase, mitochondrial; EC=3.1.3.7; AltName: Full=3'(2'),5'-bisphosphate nucleotidase; AltName: Full=3'(2'),5-bisphosphonucleoside 3'(2')-phosphohydrolase; AltName: Full=DPNPase; Flags: Precursor;	SubName: Full=Uncharacterized protein {ECO:0000313|EnsemblPlants:TRIAE_CS42_2BS_TGACv1_146181_AA0457580.1};	Salt-sensitive 3'-phosphoadenosine-5'-phosphatase HAL2/SAL1	GO:0009507,chloroplast; GO:0005739,mitochondrion; GO:0008441,3'(2'),5'-bisphosphate nucleotidase activity; GO:0046872,metal ion binding; GO:0046854,phosphatidylinositol phosphorylation	Inositol monophosphatase family
TRINITY_DN106960_c0_g1_i1.path1	1.47	1.52	0.96	5.37	5.64	3.66	18	23	12	65	86	54	3.157	1.659	7.98888e-05	0.000932406	up	4C	450055009	450055782	+	TRINITY_DN106960_c0_g1_i1	--	--	--	--	--	--	--	--
TRINITY_DN106963_c0_g1_i1.path1	11.71	6.96	6.91	1.79	1.78	3.85	53	39	32	8	10	21	0.243	-2.043	4.46495e-05	0.000565491	down	1A	464338658	464338943	+	TRINITY_DN106963_c0_g1_i1	--	--	--	--	--	--	--	--
TRINITY_DN106971_c0_g1_i1.path1	6.47	11.45	12.65	1.87	2.72	3.58	21	46	42	6	11	14	0.225	-2.153	4.96078e-05	0.000618546	down	Chr00	61290620	61290824	+	TRINITY_DN106971_c0_g1_i1	--	--	--	--	--	--	--	--
TRINITY_DN10700_c0_g1_i9.path1	1.1	1.24	0.4	4.73	6.42	5.57	35	49	13	149	255	214	5.173	2.371	9.73918e-13	5.64294e-11	up	6A	14026460	14029020	+	TRINITY_DN10700_c0_g1_i9	--	--	--	--	--	--	--	--
TRINITY_DN107009_c0_g1_i1.path1	2.72	2.69	1.99	7.43	6.5	4.12	40	49	30	108	119	73	2.071	1.05	0.00268087	0.0178251	up	3C	67366566	67367494	+	TRINITY_DN107009_c0_g1_i1	--	K00615 transketolase [EC:2.2.1.1] | (RefSeq) plastid transketolase (A)	hypothetical protein TSUD_00700 [Trifolium subterraneum]	RecName: Full=Transketolase, chloroplastic; Short=TK; EC=2.2.1.1;	--	--	GO:0009535,chloroplast thylakoid membrane; GO:0005509,calcium ion binding; GO:0050897,cobalt ion binding; GO:0030145,manganese ion binding; GO:0004802,transketolase activity; GO:0019253,reductive pentose-phosphate cycle	--
TRINITY_DN10702_c3_g1_i1.path1	11.38	13.54	11.7	53.64	50.53	49.72	38	56	40	177	210	200	3.537	1.823	1.05338e-11	5.24389e-10	up	4C	1262378	1262588	+	TRINITY_DN10702_c3_g1_i1	--	K00924 kinase [EC:2.7.1.-] | (RefSeq) receptor-like protein kinase HSL1 (A)	PREDICTED: receptor-like protein kinase HAIKU2 [Brachypodium distachyon]	RecName: Full=Receptor-like protein kinase HAIKU2; EC=2.7.11.1; Flags: Precursor;	SubName: Full=Uncharacterized protein {ECO:0000313|EMBL:KQJ85665.1, ECO:0000313|EnsemblPlants:BRADI4G00900.1};	--	GO:0016021,integral component of membrane; GO:0005524,ATP binding; GO:0004674,protein serine/threonine kinase activity; GO:0009960,endosperm development	--
TRINITY_DN10708_c0_g1_i4.path1	3.04	2.49	2.66	1.4	1.7	1.38	66	67	59	30	46	36	0.461	-1.116	0.00136576	0.0102413	down	4C	260811261	260813800	-	TRINITY_DN10708_c0_g1_i4	--	K22883 L-ornithine N5-acetyltransferase [EC:2.3.1.-] | (RefSeq) probable acetyltransferase NATA1-like (A)	PREDICTED: probable acetyltransferase NATA1-like [Brachypodium distachyon]	--	SubName: Full=Uncharacterized protein {ECO:0000313|EMBL:KQK23617.1, ECO:0000313|EnsemblPlants:BRADI1G74950.1};	--	GO:0009507,chloroplast; GO:0008080,N-acetyltransferase activity; GO:0006591,ornithine metabolic process	--
TRINITY_DN107120_c0_g1_i1.path1	39.12	32.87	28.61	17.75	21.59	18.41	667	694	499	299	458	378	0.484	-1.046	8.05797e-08	1.98477e-06	down	1C	148326296	148327823	-	TRINITY_DN107120_c0_g1_i1	--	--	uncharacterized protein LOC109771339 isoform X2 [Aegilops tauschii subsp. tauschii]	--	SubName: Full=Uncharacterized protein {ECO:0000313|EnsemblPlants:TRIAE_CS42_2DL_TGACv1_160100_AA0546780.1};	--	--	--
TRINITY_DN10713_c1_g1_i1.path2	0.21	0.09	0.14	0.72	0.57	0.68	6	3	4	20	20	23	3.813	1.931	0.00757409	0.0408689	up	4D	242414552	242416330	-	TRINITY_DN10713_c1_g1_i1	--	--	--	--	--	--	--	--
TRINITY_DN107149_c0_g1_i1.path2	1.35	6.04	3.37	10	8.18	13.67	9	50	23	66	68	110	2.473	1.306	0.00273573	0.0181207	up	5A	317907177	317907598	-	TRINITY_DN107149_c0_g1_i1	--	--	predicted protein [Hordeum vulgare subsp. vulgare]	RecName: Full=NDR1/HIN1-like protein 10 {ECO:0000303|PubMed:14666423}; Short=AtNHL10 {ECO:0000305}; AltName: Full=Protein YELLOW-LEAF-SPECIFIC GENE 9 {ECO:0000303|PubMed:11230571};	SubName: Full=Uncharacterized protein {ECO:0000313|EnsemblPlants:TRIAE_CS42_6BS_TGACv1_513131_AA1631180.1};	--	GO:0046658,anchored component of plasma membrane; GO:0009507,chloroplast; GO:0016021,integral component of membrane; GO:0009506,plasmodesma; GO:0004871,NA; GO:0051607,defense response to virus; GO:0010150,leaf senescence; GO:0051707,response to other organism	--
TRINITY_DN10719_c0_g1_i1.path2	0.89	0.96	0.41	3.43	2.25	4.04	21	28	10	80	66	115	3.6	1.848	4.98749e-06	8.20363e-05	up	5A	153546043	153547534	-	TRINITY_DN10719_c0_g1_i1	--	K13525 transitional endoplasmic reticulum ATPase | (RefSeq) pco097024a; Cell division control protein 48 homolog D (A)	Cell division control protein 48 homolog D [Zea mays]	RecName: Full=Cell division control protein 48 homolog D; Short=AtCDC48d; AltName: Full=Transitional endoplasmic reticulum ATPase D;	SubName: Full=Uncharacterized protein {ECO:0000313|EnsemblPlants:HORVU0Hr1G038060.1};	AAA+-type ATPase	GO:0005856,cytoskeleton; GO:0005829,cytosol; GO:0005794,Golgi apparatus; GO:0005730,nucleolus; GO:0005654,nucleoplasm; GO:0009524,phragmoplast; GO:0005886,plasma membrane; GO:0005524,ATP binding; GO:0016787,hydrolase activity; GO:0007049,cell cycle; GO:0051301,cell division; GO:0045732,positive regulation of protein catabolic process; GO:0015031,protein transport; GO:0046686,response to cadmium i…	--
TRINITY_DN107203_c0_g1_i1.path1	2.45	4.42	2.95	18.13	18.18	13	13	29	16	95	120	83	4.235	2.082	5.66981e-08	1.4327e-06	up	6A	426970149	426970483	-	TRINITY_DN107203_c0_g1_i1	--	--	--	--	--	--	--	--
TRINITY_DN107203_c0_g1_i1.path2	0.38	0.61	0.18	2.87	1.98	2.67	2	4	1	15	13	17	5.319	2.411	0.00824006	0.0436177	up	6A	381528062	381528395	-	TRINITY_DN107203_c0_g1_i1	--	--	--	--	--	--	--	--
TRINITY_DN107209_c0_g1_i1.path1	11.38	7.18	11.5	4.24	4.31	5.21	87	68	90	32	41	48	0.382	-1.388	5.57206e-05	0.000683927	down	1A	422358143	422360781	+	TRINITY_DN107209_c0_g1_i1	--	--	--	--	--	--	--	--
TRINITY_DN10721_c0_g1_i1.path1	109.79	85.6	121.64	44.54	37.58	51.62	756	730	857	303	322	428	0.351	-1.511	3.5323e-13	2.18874e-11	down	1D	454052010	454053567	-	TRINITY_DN10721_c0_g1_i1	--	K08681 5'-phosphate synthase pdxT subunit [EC:4.3.3.6] | (RefSeq) probable pyridoxal 5'-phosphate synthase subunit PDX2 (A)	PREDICTED: probable pyridoxal 5'-phosphate synthase subunit PDX2 [Brachypodium distachyon]	RecName: Full=Probable pyridoxal 5'-phosphate synthase subunit PDX2; Short=AtPDX2; EC=4.3.3.6 {ECO:0000269|PubMed:17468224}; AltName: Full=Protein EMBRYO DEFECTIVE 2407; AltName: Full=Pyridoxal 5'-phosphate synthase glutaminase subunit; EC=3.5.1.2 {ECO:0000269|PubMed:17468224};	SubName: Full=Uncharacterized protein {ECO:0000313|EnsemblPlants:HORVU4Hr1G075840.6};	Imidazoleglycerol-phosphate synthase subunit H-like	GO:0005829,cytosol; GO:1903600,glutaminase complex; GO:0004359,glutaminase activity; GO:0046982,protein heterodimerization activity; GO:0036381,pyridoxal 5'-phosphate synthase (glutamine hydrolysing) activity; GO:0006541,glutamine metabolic process; GO:0042823,pyridoxal phosphate biosynthetic process; GO:0008614,pyridoxine metabolic process; GO:0042819,vitamin B6 biosynthetic process	SNO glutamine amidotransferase family
TRINITY_DN10721_c0_g1_i1.path2	95.05	79.8	93.75	41.99	34.04	38.56	653	679	659	285	291	319	0.357	-1.486	1.27392e-14	9.84419e-13	down	4A	333660137	333661692	-	TRINITY_DN10721_c0_g1_i1	--	K08681 5'-phosphate synthase pdxT subunit [EC:4.3.3.6] | (RefSeq) probable pyridoxal 5'-phosphate synthase subunit PDX2 (A)	PREDICTED: probable pyridoxal 5'-phosphate synthase subunit PDX2 [Brachypodium distachyon]	RecName: Full=Probable pyridoxal 5'-phosphate synthase subunit PDX2; Short=AtPDX2; EC=4.3.3.6 {ECO:0000269|PubMed:17468224}; AltName: Full=Protein EMBRYO DEFECTIVE 2407; AltName: Full=Pyridoxal 5'-phosphate synthase glutaminase subunit; EC=3.5.1.2 {ECO:0000269|PubMed:17468224};	SubName: Full=Uncharacterized protein {ECO:0000313|EnsemblPlants:HORVU4Hr1G075840.8};	Imidazoleglycerol-phosphate synthase subunit H-like	GO:0005829,cytosol; GO:1903600,glutaminase complex; GO:0004359,glutaminase activity; GO:0046982,protein heterodimerization activity; GO:0036381,pyridoxal 5'-phosphate synthase (glutamine hydrolysing) activity; GO:0006541,glutamine metabolic process; GO:0042823,pyridoxal phosphate biosynthetic process; GO:0008614,pyridoxine metabolic process; GO:0042819,vitamin B6 biosynthetic process	SNO glutamine amidotransferase family
TRINITY_DN107210_c0_g1_i1.path2	3	2.42	1.95	0.51	0.27	0.69	18	18	12	3	2	5	0.166	-2.594	0.00108632	0.00849861	down	4D	317443749	317444127	+	TRINITY_DN107210_c0_g1_i1	--	--	--	--	--	--	--	--
TRINITY_DN10726_c0_g1_i1.path1	1.99	5.94	5.92	14.51	9.86	19.67	26	96	79	187	160	309	2.642	1.401	6.06585e-05	0.000734678	up	6A	374801711	374802534	+	TRINITY_DN10726_c0_g1_i1	--	--	uncharacterized protein LOC109772429 [Aegilops tauschii subsp. tauschii]	--	SubName: Full=Uncharacterized protein {ECO:0000313|EnsemblPlants:TRIAE_CS42_2DS_TGACv1_178366_AA0594650.1};	--	--	--
TRINITY_DN107280_c0_g1_i1.path1	10.41	12	15.05	5.59	8.53	7.23	98	140	145	52	100	82	0.479	-1.061	0.00025452	0.00250714	down	7C	571400740	571401334	+	TRINITY_DN107280_c0_g1_i1	--	--	--	--	--	--	--	--
TRINITY_DN107304_c0_g1_i1.path1	22.01	24.81	35.18	72.65	57.95	70.74	192	268	314	626	629	743	2.049	1.035	3.63557e-06	6.2146e-05	up	2C	125345344	125345894	-	TRINITY_DN107304_c0_g1_i1	--	--	--	--	--	--	--	--
TRINITY_DN107335_c0_g1_i1.path1	2.74	3.82	4.62	13.34	14.99	12.81	11	19	19	53	75	62	3.099	1.632	0.000109473	0.00121676	up	Chr00	80140274	80140527	-	TRINITY_DN107335_c0_g1_i1	--	--	--	--	--	--	--	--
TRINITY_DN107422_c0_g1_i1.path1	11.98	7.91	4.26	250.26	119.04	161.45	44	36	16	908	544	714	18.644	4.221	1.66661e-39	9.75686e-37	up	4D	324756401	324756632	-	TRINITY_DN107422_c0_g1_i1	--	--	--	--	--	--	--	--
TRINITY_DN107422_c0_g1_i1.path2	25.6	28.14	18.63	284.71	150.11	145.39	94	128	70	1033	686	643	6.816	2.769	1.06549e-23	1.94442e-21	up	4A	397774568	397774799	-	TRINITY_DN107422_c0_g1_i1	--	--	--	--	--	--	--	--
TRINITY_DN107519_c0_g1_i1.path1	22.58	14.96	13.85	3.89	7.57	5.63	223	183	140	38	93	67	0.282	-1.829	1.84729e-09	6.32286e-08	down	2C	490868458	490869081	-	TRINITY_DN107519_c0_g1_i1	--	--	--	--	--	--	--	--
TRINITY_DN10752_c0_g1_i1.path1	0	0.6	0	40.34	30.01	76.48	0	5	0	270	253	624	194.536	7.604	8.75477e-13	5.1049e-11	up	1A	310730417	310730844	-	TRINITY_DN10752_c0_g1_i1	--	K03265 peptide chain release factor subunit 1 | (RefSeq) eukaryotic peptide chain release factor subunit 1-2 (A)	Eukaryotic peptide chain release factor subunit 1-2 [Triticum urartu]	RecName: Full=Eukaryotic peptide chain release factor subunit 1-2; Short=Eukaryotic release factor 1-2; Short=eRF1-2; AltName: Full=Omnipotent suppressor protein 1 homolog 2; Short=SUP1 homolog 2;	SubName: Full=Uncharacterized protein {ECO:0000313|EnsemblPlants:TRIAE_CS42_1BL_TGACv1_030290_AA0085570.1};	Peptide chain release factor 1 (eRF1)	GO:0005829,cytosol; GO:0005886,plasma membrane; GO:0003747,translation release factor activity; GO:0040008,regulation of growth; GO:0006415,translational termination	eRF1 domain 2
TRINITY_DN10752_c0_g1_i1.path2	3.54	4.89	4.76	16.14	6.64	27.46	24	41	33	108	56	224	3.141	1.651	7.48917e-05	0.000881251	up	1A	442522690	442523117	-	TRINITY_DN10752_c0_g1_i1	--	K03265 peptide chain release factor subunit 1 | (RefSeq) LOC109737585; eukaryotic peptide chain release factor subunit 1-2-like (A)	Eukaryotic peptide chain release factor subunit 1-2 [Triticum urartu]	RecName: Full=Eukaryotic peptide chain release factor subunit 1-2; Short=Eukaryotic release factor 1-2; Short=eRF1-2; AltName: Full=Omnipotent suppressor protein 1 homolog 2; Short=SUP1 homolog 2;	SubName: Full=Uncharacterized protein {ECO:0000313|EnsemblPlants:TRIAE_CS42_1BL_TGACv1_030290_AA0085570.1};	Peptide chain release factor 1 (eRF1)	GO:0005829,cytosol; GO:0005886,plasma membrane; GO:0003747,translation release factor activity; GO:0040008,regulation of growth; GO:0006415,translational termination	eRF1 domain 2
TRINITY_DN107544_c0_g1_i1.path1	8.05	8.13	8.61	26.49	26.9	28.22	32	40	35	104	133	135	2.768	1.469	1.22672e-06	2.35431e-05	up	3A	12892472	12892722	-	TRINITY_DN107544_c0_g1_i1	--	--	--	--	--	--	--	--
TRINITY_DN10755_c0_g2_i1.path1	8.81	7.3	6.34	28.51	25.62	18.77	76	78	56	243	275	195	2.752	1.461	9.39452e-08	2.28703e-06	up	4C	194204648	194205543	-	TRINITY_DN10755_c0_g2_i1	--	K10696 E3 ubiquitin-protein ligase BRE1 [EC:2.3.2.27] | (RefSeq) LOC109766382; E3 ubiquitin-protein ligase BRE1-like 2 (A)	E3 ubiquitin-protein ligase BRE1-like 2 isoform X3 [Sorghum bicolor]	RecName: Full=E3 ubiquitin-protein ligase BRE1-like 2; EC=2.3.2.27 {ECO:0000250|UniProtKB:Q9C895}; AltName: Full=RING-type E3 ubiquitin transferase BRE1-like 2 {ECO:0000305};	SubName: Full=Uncharacterized protein {ECO:0000313|EnsemblPlants:TRIAE_CS42_3DL_TGACv1_250968_AA0875700.1};	E3 ubiquitin ligase involved in syntaxin degradation	GO:0005634,nucleus; GO:0046872,metal ion binding; GO:0042803,protein homodimerization activity; GO:0004842,ubiquitin-protein transferase activity; GO:0033523,histone H2B ubiquitination; GO:0010390,histone monoubiquitination; GO:0045087,innate immune response; GO:0009965,leaf morphogenesis; GO:0010162,seed dormancy process; GO:0010228,vegetative to reproductive phase transition of meristem	Zinc finger, C3HC4 type (RING finger)
TRINITY_DN107564_c0_g1_i1.path1	36.1	39.06	33.81	22.58	26.39	14.99	144	193	138	89	131	72	0.498	-1.006	0.000290448	0.00280368	down	6C	70140500	70140751	-	TRINITY_DN107564_c0_g1_i1	--	--	--	--	--	--	--	--
TRINITY_DN107571_c0_g1_i1.path1	0.62	0.75	0.3	0.63	5.25	9.56	2	3	1	2	21	37	7.586	2.923	0.00404592	0.0247887	up	4C	90361962	90362164	-	TRINITY_DN107571_c0_g1_i1	--	--	--	--	--	--	--	--
TRINITY_DN107576_c0_g1_i1.path1	7.52	4.79	3.67	0.44	0.35	0.36	52	41	26	3	3	3	0.06	-4.057	1.76095e-09	6.04431e-08	down	Chr00	61286481	61286917	+	TRINITY_DN107576_c0_g1_i1	--	K11153 retinol dehydrogenase 12 [EC:1.1.1.300] | (RefSeq) short-chain dehydrogenase TIC 32, chloroplastic-like (A)	PREDICTED: short-chain dehydrogenase TIC 32, chloroplastic-like [Malus domestica]	RecName: Full=Short-chain dehydrogenase TIC 32, chloroplastic; EC=1.1.1.-; AltName: Full=Translocon at the inner envelope membrane of chloroplasts 32; Short=AtTIC32;	SubName: Full=Uncharacterized protein {ECO:0000313|EnsemblPlants:HORVU3Hr1G013970.8};	Dehydrogenases with different specificities (related to short-chain alcohol dehydrogenases)	GO:0009507,chloroplast; GO:0009941,chloroplast envelope; GO:0009706,chloroplast inner membrane; GO:0005886,plasma membrane; GO:0016491,oxidoreductase activity; GO:0015031,protein transport	--
TRINITY_DN107609_c0_g1_i1.path1	0.88	0.9	0.62	2.34	3.14	2.32	11	14	8	29	49	35	2.748	1.459	0.00464665	0.0277287	up	7C	115275908	115276700	-	TRINITY_DN107609_c0_g1_i1	--	--	predicted protein [Hordeum vulgare subsp. vulgare]	--	SubName: Full=Uncharacterized protein {ECO:0000313|EnsemblPlants:HORVU2Hr1G080770.4};	--	GO:0016021,integral component of membrane; GO:0005524,ATP binding; GO:0004672,protein kinase activity	--
TRINITY_DN107621_c0_g1_i1.path2	0.8	1.29	1.82	4.03	6.4	6.83	3	6	7	15	30	31	3.71	1.891	0.00500215	0.0294037	up	4A	351897651	351897888	-	TRINITY_DN107621_c0_g1_i1	--	--	--	--	--	--	--	--
TRINITY_DN107637_c0_g1_i1.path1	7.42	5.74	4.88	3.23	3.73	3.42	144	138	97	62	90	80	0.486	-1.042	0.000166931	0.00174661	down	4C	447177052	447178277	+	TRINITY_DN107637_c0_g1_i1	--	K14963 COMPASS component SWD3 | (RefSeq) protein JINGUBANG-like (A)	protein JINGUBANG-like [Aegilops tauschii subsp. tauschii]	RecName: Full=Protein JINGUBANG {ECO:0000303|PubMed:27468890};	SubName: Full=Uncharacterized protein {ECO:0000313|EnsemblPlants:TRIAE_CS42_4BS_TGACv1_327835_AA1075650.1};	FOG: WD40 repeat	GO:0005737,cytoplasm; GO:0005634,nucleus; GO:0009846,pollen germination	WD domain, G-beta repeat
TRINITY_DN107655_c0_g1_i1.path1	23.87	21.33	21.45	13.82	9.85	15.47	187	207	172	107	96	146	0.491	-1.027	2.49338e-05	0.000341116	down	4A	282618525	282619146	-	TRINITY_DN107655_c0_g1_i1	--	--	--	--	--	--	--	--
TRINITY_DN10766_c0_g1_i1.path1	83.47	108.77	124.1	34.72	37.32	32.48	399	644	607	164	222	187	0.278	-1.849	1.47146e-17	1.59763e-15	down	2C	506648331	506648632	+	TRINITY_DN10766_c0_g1_i1	--	K10666 E3 ubiquitin-protein ligase RNF5 [EC:2.3.2.27] | (RefSeq) LOC109732108; E3 ubiquitin-protein ligase RMA1H1-like (A)	E3 ubiquitin-protein ligase RMA1H1-like [Aegilops tauschii subsp. tauschii]	--	SubName: Full=RING finger protein 185 {ECO:0000313|EMBL:EMT31923.1, ECO:0000313|EnsemblPlants:EMT31923};	--	GO:0016021,integral component of membrane; GO:0046872,metal ion binding	--
TRINITY_DN107684_c0_g1_i1.path1	59.44	44.46	50.3	3.52	3.31	1.07	462	428	400	27	32	10	0.043	-4.542	8.26643e-47	7.9596e-44	down	6D	258007097	258007689	+	TRINITY_DN107684_c0_g1_i1	--	--	--	--	--	--	--	--
TRINITY_DN107692_c0_g1_i1.path1	1.12	1.21	1.31	0.54	0.21	0.58	21	28	25	10	5	13	0.303	-1.721	0.00322539	0.0206845	down	3C	330732229	330733410	+	TRINITY_DN107692_c0_g1_i1	--	--	--	--	--	--	--	--
TRINITY_DN107699_c0_g1_i1.path1	0	0.08	0	1.17	0.39	5.75	0	1	0	12	5	72	61.912	5.952	3.58678e-05	0.000467208	up	3C	14638275	14638931	+	TRINITY_DN107699_c0_g1_i1	--	--	protein NEN4-like [Aegilops tauschii subsp. tauschii]	RecName: Full=Protein NEN1 {ECO:0000303|PubMed:25081480}; AltName: Full=NAC45/NAC86-dependent exonuclease-domain protein 1 {ECO:0000303|PubMed:25081480}; EC=3.1.11.-;	SubName: Full=Exonuclease, putative {ECO:0000313|EMBL:CCG48001.1, ECO:0000313|EnsemblPlants:TRIAE_CS42_3DS_TGACv1_273595_AA0932360.1};	--	GO:0005737,cytoplasm; GO:0005634,nucleus; GO:0008408,3'-5' exonuclease activity; GO:0046872,metal ion binding; GO:0003676,nucleic acid binding	--
TRINITY_DN10770_c0_g1_i12.path1	1.2	1.48	0.94	2.83	2.39	3.52	40	61	32	93	99	141	2.023	1.016	0.00112381	0.00873679	up	1C	193407309	193410015	-	TRINITY_DN10770_c0_g1_i12	--	--	--	--	--	--	--	--
TRINITY_DN107718_c0_g1_i1.path2	171.51	189.48	217.18	81.73	117.8	88.85	771	1055	999	363	659	481	0.42	-1.253	9.55096e-10	3.43792e-08	down	3A	5617325	5617608	-	TRINITY_DN107718_c0_g1_i1	--	--	--	--	--	--	--	--
TRINITY_DN107770_c0_g1_i1.path1	0	1.27	0.22	8.42	4.88	4.11	0	7	1	37	27	22	9.474	3.244	9.27204e-05	0.0010587	up	6A	309246410	309246690	+	TRINITY_DN107770_c0_g1_i1	--	--	--	--	--	--	--	--
TRINITY_DN107799_c0_g1_i1.path1	2.88	3.6	1.28	12.47	18.54	9.58	11	17	5	47	88	44	4.444	2.152	1.87254e-05	0.000265512	up	4C	527436028	527436885	+	TRINITY_DN107799_c0_g1_i1	--	--	--	--	--	--	--	--
TRINITY_DN107807_c0_g1_i1.path1	1.44	3.78	2.29	4.29	6.66	8.31	16	52	26	47	92	111	2.146	1.102	0.00587127	0.033387	up	7C	421047910	421048610	+	TRINITY_DN107807_c0_g1_i1	--	--	--	--	--	--	--	--
TRINITY_DN107818_c0_g1_i1.path1	3.38	2.73	1.7	9.81	12.17	8.5	31	31	16	89	139	94	3.317	1.73	1.76206e-06	3.25621e-05	up	4C	214390301	214390880	-	TRINITY_DN107818_c0_g1_i1	--	--	--	--	--	--	--	--
TRINITY_DN107882_c0_g1_i1.path1	1.52	1.94	1.48	7.42	5.48	8.18	12	19	12	58	54	78	3.571	1.836	1.85365e-05	0.000263292	up	2D	84157573	84158072	+	TRINITY_DN107882_c0_g1_i1	--	--	--	--	--	--	--	--
TRINITY_DN107891_c0_g1_i1.path1	7.34	7.28	14.35	2.73	2.91	3.24	79	97	158	29	39	42	0.255	-1.973	4.10965e-08	1.06797e-06	down	3C	86872434	86879421	+	TRINITY_DN107891_c0_g1_i1	--	K01206 alpha-L-fucosidase [EC:3.2.1.51] | (RefSeq) alpha-L-fucosidase 3 (A)	hypothetical protein BRADI_2g45280v3 [Brachypodium distachyon]	RecName: Full=GDSL esterase/lipase At1g28600; EC=3.1.1.-; AltName: Full=Extracellular lipase At1g28600; Flags: Precursor;	SubName: Full=Uncharacterized protein {ECO:0000313|EnsemblPlants:TRIAE_CS42_3B_TGACv1_222744_AA0769900.1};	--	GO:0005618,cell wall; GO:0005576,extracellular region; GO:0016788,hydrolase activity, acting on ester bonds; GO:0016042,lipid catabolic process	--
TRINITY_DN10799_c0_g1_i1.path4	1.57	2.11	2.55	5.81	5.45	7.66	9	15	15	33	39	53	2.54	1.345	0.00558105	0.0320477	up	4A	426531506	426533690	+	TRINITY_DN10799_c0_g1_i1	--	K10773 endonuclease III [EC:4.2.99.18] | (RefSeq) putative DNA glycosylase At3g47830 (A)	PREDICTED: uncharacterized protein LOC100841571 [Brachypodium distachyon]	RecName: Full=Protein ROS1; EC=3.2.2.-; AltName: Full=DEMETER-like protein 1; AltName: Full=Repressor of silencing 1;	SubName: Full=Uncharacterized protein {ECO:0000313|EMBL:KQJ86995.1, ECO:0000313|EnsemblPlants:BRADI4G08870.1};	--	GO:0005730,nucleolus; GO:0005634,nucleus; GO:0051539,4 iron, 4 sulfur cluster binding; GO:0003677,DNA binding; GO:0019104,DNA N-glycosylase activity; GO:0003906,DNA-(apurinic or apyrimidinic site) endonuclease activity; GO:0046872,metal ion binding; GO:0006284,base-excision repair; GO:0006342,chromatin silencing; GO:0050832,defense response to fungus; GO:0080111,DNA demethylation; GO:0006306,DNA …	HhH-GPD superfamily base excision DNA repair protein
TRINITY_DN108019_c0_g1_i1.path1	6.85	7.33	8.15	1.31	2.08	6.31	37	49	45	7	14	41	0.36	-1.474	0.00358951	0.022557	down	7A	471176448	471176788	+	TRINITY_DN108019_c0_g1_i1	--	--	--	--	--	--	--	--
TRINITY_DN10802_c0_g1_i1.path1	0	0.2	0	3	1.98	4.1	0	1	0	12	10	20	30.834	4.946	0.000636685	0.00544681	up	5D	427047181	427047775	+	TRINITY_DN10802_c0_g1_i1	--	K15631 molybdenum cofactor sulfurtransferase [EC:2.8.1.9] | (RAP-DB) Os06g0670000; Similar to Molybdenum cofactor sulfurase. (A)	MOSC domain-containing protein 2, mitochondrial [Triticum urartu]	RecName: Full=Molybdenum cofactor sulfurase {ECO:0000255|HAMAP-Rule:MF_03050}; Short=MCS {ECO:0000255|HAMAP-Rule:MF_03050}; Short=MOS {ECO:0000255|HAMAP-Rule:MF_03050}; Short=MoCo sulfurase {ECO:0000255|HAMAP-Rule:MF_03050}; EC=2.8.1.9 {ECO:0000255|HAMAP-Rule:MF_03050}; AltName: Full=Molybdenum cofactor sulfurase-like protein 3 {ECO:0000255|HAMAP-Rule:MF_03050}; AltName: Full=Molybdenum cofactor …	SubName: Full=Uncharacterized protein {ECO:0000313|EnsemblPlants:TRIAE_CS42_5AL_TGACv1_375555_AA1223640.1};	Uncharacterized Fe-S protein	GO:0008265,Mo-molybdopterin cofactor sulfurase activity; GO:0102867,molybdenum cofactor sulfurtransferase activity; GO:0030151,molybdenum ion binding; GO:0030170,pyridoxal phosphate binding; GO:0006777,Mo-molybdopterin cofactor biosynthetic process	MOSC domain
TRINITY_DN10802_c0_g1_i1.path2	0	0	0	3.5	4.36	1.23	0	0	0	14	22	6	61.72	5.948	6.35098e-05	0.000763025	up	5A	477450888	477451487	+	TRINITY_DN10802_c0_g1_i1	--	K15631 molybdenum cofactor sulfurtransferase [EC:2.8.1.9] | (RAP-DB) Os06g0670000; Similar to Molybdenum cofactor sulfurase. (A)	MOSC domain-containing protein 2, mitochondrial [Triticum urartu]	RecName: Full=Molybdenum cofactor sulfurase {ECO:0000255|HAMAP-Rule:MF_03050}; Short=MCS {ECO:0000255|HAMAP-Rule:MF_03050}; Short=MOS {ECO:0000255|HAMAP-Rule:MF_03050}; Short=MoCo sulfurase {ECO:0000255|HAMAP-Rule:MF_03050}; EC=2.8.1.9 {ECO:0000255|HAMAP-Rule:MF_03050}; AltName: Full=Molybdenum cofactor sulfurase-like protein 3 {ECO:0000255|HAMAP-Rule:MF_03050}; AltName: Full=Molybdenum cofactor …	SubName: Full=Uncharacterized protein {ECO:0000313|EnsemblPlants:TRIAE_CS42_5AL_TGACv1_375555_AA1223640.1};	Uncharacterized Fe-S protein	GO:0008265,Mo-molybdopterin cofactor sulfurase activity; GO:0102867,molybdenum cofactor sulfurtransferase activity; GO:0030151,molybdenum ion binding; GO:0030170,pyridoxal phosphate binding; GO:0006777,Mo-molybdopterin cofactor biosynthetic process	MOSC domain
TRINITY_DN108027_c0_g1_i1.path1	0.83	0.5	1.42	6.09	1.25	3.36	8	6	14	58	15	39	3.243	1.697	0.00760756	0.0410163	up	5A	426001363	426001971	-	TRINITY_DN108027_c0_g1_i1	--	K20623 typhasterol/6-deoxotyphasterol 2alpha-hydroxylase | (RefSeq) LOC109739623; cytochrome P450 71A1-like (A)	cytochrome P450 71A1-like [Aegilops tauschii subsp. tauschii]	RecName: Full=Flavonoid 3'-monooxygenase; EC=1.14.13.21; AltName: Full=Cytochrome P450 75B2; AltName: Full=Flavonoid 3'-hydroxylase;	SubName: Full=Flavonoid 3'-monooxygenase {ECO:0000313|EMBL:EMT01785.1, ECO:0000313|EnsemblPlants:EMT01785};	Cytochrome P450 CYP2 subfamily	GO:0005789,endoplasmic reticulum membrane; GO:0016021,integral component of membrane; GO:0016711,flavonoid 3'-monooxygenase activity; GO:0020037,heme binding; GO:0005506,iron ion binding; GO:0009813,flavonoid biosynthetic process	--
TRINITY_DN108034_c0_g1_i1.path1	5.04	4.15	6.9	2.04	1.84	4.04	55	56	77	22	25	53	0.407	-1.296	0.00127447	0.00969488	down	1D	279186423	279187375	-	TRINITY_DN108034_c0_g1_i1	--	--	--	--	--	--	--	--
TRINITY_DN108036_c0_g1_i1.path1	0.7	4.89	2.28	0.47	0.28	0.48	6	52	20	4	3	5	0.132	-2.919	0.00016806	0.00175617	down	3C	33455574	33456115	+	TRINITY_DN108036_c0_g1_i1	--	--	uncharacterized protein LOC109787186 isoform X3 [Aegilops tauschii subsp. tauschii]	--	SubName: Full=Uncharacterized protein {ECO:0000313|EMBL:EMT21119.1, ECO:0000313|EnsemblPlants:EMT21119};	--	--	--
TRINITY_DN108037_c0_g1_i1.path1	1.18	1.37	3.45	0	0.42	1.09	9	13	27	0	4	10	0.208	-2.263	0.00850808	0.0447406	down	3A	220598597	220599079	-	TRINITY_DN108037_c0_g1_i1	--	K04733 interleukin-1 receptor-associated kinase 4 [EC:2.7.11.1] | (RefSeq) probable LRR receptor-like serine/threonine-protein kinase RFK1 (A)	uncharacterized protein LOC109749325 [Aegilops tauschii subsp. tauschii]	RecName: Full=Retrovirus-related Pol polyprotein from transposon RE1; AltName: Full=Retro element 1 {ECO:0000303|PubMed:10689195}; Short=AtRE1 {ECO:0000303|PubMed:10689195}; Includes: RecName: Full=Protease RE1; EC=3.4.23.-; Includes: RecName: Full=Reverse transcriptase RE1; EC=2.7.7.49; Includes: RecName: Full=Endonuclease RE1;	SubName: Full=Uncharacterized protein {ECO:0000313|EnsemblPlants:TRIAE_CS42_2BS_TGACv1_146468_AA0465810.1};	FOG: Transposon-encoded proteins with TYA, reverse transcriptase, integrase domains in various combinations	GO:0004190,aspartic-type endopeptidase activity; GO:0004519,endonuclease activity; GO:0046872,metal ion binding; GO:0003676,nucleic acid binding; GO:0003964,RNA-directed DNA polymerase activity; GO:0015074,DNA integration; GO:0006310,DNA recombination	--
TRINITY_DN10806_c1_g2_i8.path2	0.12	0.21	0.35	0.08	0.04	0.02	9	20	27	6	4	2	0.175	-2.516	0.00120308	0.00924694	down	7D	5562449	5567495	+	TRINITY_DN10806_c1_g2_i8	--	--	--	--	--	--	--	--
TRINITY_DN108064_c0_g1_i1.path1	3.35	4.79	2.27	0.26	0	1.28	13	23	9	1	0	6	0.124	-3.009	0.00160773	0.0117312	down	3C	373613397	373613641	+	TRINITY_DN108064_c0_g1_i1	--	--	--	--	--	--	--	--
TRINITY_DN108080_c0_g1_i1.path1	0.56	5.55	4.72	9.22	8.06	21.76	3	37	26	49	54	141	2.97	1.57	0.00342169	0.0217094	up	2C	363106131	363106470	+	TRINITY_DN108080_c0_g1_i1	--	--	--	--	--	--	--	--
TRINITY_DN108098_c0_g1_i1.path1	2.87	6.85	3.85	31.79	29.94	39.17	24	71	33	263	312	395	6.217	2.636	1.60826e-20	2.28083e-18	up	2C	432389336	432389864	+	TRINITY_DN108098_c0_g1_i1	--	--	--	--	--	--	--	--
TRINITY_DN1081_c0_g1_i14.path1	0.24	0.49	0.59	3.46	3.13	2.56	7	18	18	101	115	91	5.802	2.537	4.60664e-10	1.73589e-08	up	5C	480339309	480341176	+	TRINITY_DN1081_c0_g1_i14	--	--	ELF4-like protein [Hordeum vulgare]	RecName: Full=Protein ELF4-LIKE 3;	SubName: Full=ELF4-like protein {ECO:0000313|EMBL:ACK56114.1};	--	GO:0005634,nucleus; GO:0042803,protein homodimerization activity; GO:0042753,positive regulation of circadian rhythm; GO:0048511,rhythmic process	Protein of unknown function (DUF1313)
TRINITY_DN108120_c0_g1_i1.path1	0.22	0.53	0.43	24.42	20.39	17.97	3	9	6	330	347	296	44.247	5.468	2.31969e-38	1.286e-35	up	2C	114937655	114938608	-	TRINITY_DN108120_c0_g1_i1	--	K13993 HSP20 family protein | (RefSeq) LOC109767066; 18.8 kDa class V heat shock protein (A)	18.8 kDa class V heat shock protein [Aegilops tauschii subsp. tauschii]	RecName: Full=18.8 kDa class V heat shock protein; AltName: Full=18.8 kDa heat shock protein; Short=OsHsp18.8;	SubName: Full=Uncharacterized protein {ECO:0000313|EnsemblPlants:TRIAE_CS42_2DS_TGACv1_177836_AA0585560.1};	Molecular chaperone (small heat-shock protein Hsp26/Hsp42)	GO:0005737,cytoplasm; GO:0009408,response to heat	--
TRINITY_DN108136_c0_g1_i1.path1	2.17	3.23	3.36	22.64	14.9	23.88	39	72	62	403	334	518	5.858	2.55	1.59233e-22	2.66501e-20	up	1A	342606169	342607397	+	TRINITY_DN108136_c0_g1_i1	--	--	--	--	--	--	--	--
TRINITY_DN10817_c0_g1_i2.path1	10.11	15.65	5.72	62	58.02	49.13	121	232	70	733	864	708	4.588	2.198	1.28285e-16	1.27033e-14	up	5D	47277958	47280799	+	TRINITY_DN10817_c0_g1_i2	--	K19892 glucan endo-1,3-beta-glucosidase 4 [EC:3.2.1.39] | (RefSeq) LOC109735056; glucan endo-1,3-beta-glucosidase 12-like (A)	predicted protein [Hordeum vulgare subsp. vulgare]	RecName: Full=Glucan endo-1,3-beta-glucosidase 4; EC=3.2.1.39; AltName: Full=(1->3)-beta-glucan endohydrolase 4; Short=(1->3)-beta-glucanase 4; AltName: Full=Beta-1,3-endoglucanase 4; Short=Beta-1,3-glucanase 4; Flags: Precursor;	SubName: Full=Uncharacterized protein {ECO:0000313|EnsemblPlants:HORVU4Hr1G068960.6};	--	GO:0031225,anchored component of membrane; GO:0046658,anchored component of plasma membrane; GO:0005886,plasma membrane; GO:0042973,glucan endo-1,3-beta-D-glucosidase activity; GO:0004553,hydrolase activity, hydrolyzing O-glycosyl compounds; GO:0030247,polysaccharide binding; GO:0005975,carbohydrate metabolic process; GO:0006952,defense response	Glycosyl hydrolases family 17
TRINITY_DN10817_c0_g1_i2.path2	2.2	5.27	2.98	27.21	28.21	32.11	26	77	36	317	414	456	7.006	2.809	4.2145e-25	8.68769e-23	up	5A	76425145	76427883	+	TRINITY_DN10817_c0_g1_i2	--	--	--	--	--	--	--	--
TRINITY_DN108201_c0_g1_i1.path1	4.58	5.48	5.87	14.87	15.74	11.93	29	43	38	93	124	91	2.253	1.172	0.000366408	0.00342357	up	7C	575619068	575619467	-	TRINITY_DN108201_c0_g1_i1	--	--	--	--	--	--	--	--
TRINITY_DN10822_c0_g1_i5.path1	0.33	0.6	0.31	1.6	2.21	1.83	19	42	18	90	156	125	3.826	1.936	3.1539e-08	8.38356e-07	up	3C	15695319	15700231	-	TRINITY_DN10822_c0_g1_i5	--	--	hypothetical protein BRADI_2g01330v3 [Brachypodium distachyon]	--	SubName: Full=Uncharacterized protein {ECO:0000313|EnsemblPlants:HORVU3Hr1G002670.31};	--	GO:0000124,SAGA complex; GO:0003712,transcription coregulator activity	--
TRINITY_DN10822_c1_g1_i1.path1	1.05	0.89	0.36	5.13	5.67	3.82	20	21	7	97	135	88	5.431	2.441	2.04399e-09	6.93451e-08	up	3C	15694188	15695395	+	TRINITY_DN10822_c1_g1_i1	--	--	PREDICTED: uncharacterized protein LOC100843036 isoform X1 [Brachypodium distachyon]	--	SubName: Full=Uncharacterized protein {ECO:0000313|EnsemblPlants:BRADI2G01330.1};	--	GO:0000124,SAGA complex; GO:0003712,transcription coregulator activity	--
TRINITY_DN108301_c0_g1_i1.path1	0.4	0.85	0.73	0.05	0.12	0.33	8	21	15	1	3	8	0.214	-2.225	0.00768243	0.0413529	down	7D	523564933	523566384	+	TRINITY_DN108301_c0_g1_i1	--	--	hypothetical protein BRADI_1g43840v3 [Brachypodium distachyon]	--	SubName: Full=Uncharacterized protein {ECO:0000313|EMBL:KQK18648.1};	--	GO:0005634,nucleus; GO:0043565,sequence-specific DNA binding; GO:0000077,DNA damage checkpoint; GO:0040020,regulation of meiotic nuclear division; GO:0006355,regulation of transcription, DNA-templated; GO:0010332,response to gamma radiation; GO:0006351,transcription, DNA-templated	--
TRINITY_DN10831_c0_g1_i4.path1	0.42	0.38	0.43	1.46	1.23	1.13	15	17	16	52	55	49	2.613	1.386	0.00149494	0.0110414	up	7C	74910853	74914664	+	TRINITY_DN10831_c0_g1_i4	--	--	predicted protein [Hordeum vulgare subsp. vulgare]	--	SubName: Full=Predicted protein {ECO:0000313|EMBL:BAJ99519.1};	Uncharacterized conserved membrane protein	GO:0016021,integral component of membrane	Cytochrome B561, N terminal
TRINITY_DN108313_c0_g1_i1.path1	0.8	1.4	1.83	5.69	7.53	9.45	6	13	14	42	70	85	4.684	2.228	1.9007e-06	3.48338e-05	up	6C	458882772	458883243	+	TRINITY_DN108313_c0_g1_i1	--	K19613 leucine-rich repeat protein SHOC2 | (RefSeq) receptor-like protein 2 (A)	receptor-like protein 2 [Aegilops tauschii subsp. tauschii]	RecName: Full=Receptor-like protein 2 {ECO:0000303|PubMed:18434605}; Short=AtRLP2 {ECO:0000303|PubMed:18434605}; Flags: Precursor;	SubName: Full=Uncharacterized protein {ECO:0000313|EnsemblPlants:TRIAE_CS42_6DS_TGACv1_543572_AA1741600.1};	FOG: Leucine rich repeat	GO:0016021,integral component of membrane; GO:0005886,plasma membrane	Leucine Rich repeats (2 copies)
TRINITY_DN10832_c0_g1_i4.path1	1.42	1.38	0.79	2.97	2.78	2.92	49	59	28	101	119	121	2.031	1.022	0.0010573	0.0083156	up	5D	312557311	312561185	-	TRINITY_DN10832_c0_g1_i4	--	K03514 non-canonical poly(A) RNA polymerase PAPD5/7 [EC:2.7.7.19] | (RefSeq) protein HESO1-like (A)	uncharacterized protein LOC109753437 isoform X2 [Aegilops tauschii subsp. tauschii]	--	SubName: Full=Uncharacterized protein {ECO:0000313|EnsemblPlants:TRIAE_CS42_5BL_TGACv1_404201_AA1289850.1};	DNA polymerase sigma	--	Cid1 family poly A polymerase
TRINITY_DN10834_c0_g2_i8.path1	2.68	5	3.43	11.1	8.56	13.62	68	157	89	278	270	416	2.509	1.327	2.53035e-07	5.63678e-06	up	4D	268470250	268473001	-	TRINITY_DN10834_c0_g2_i8	--	K08051 pleckstrin homology domain containing family A member 8 | (RefSeq) glycolipid transfer protein (A)	PREDICTED: ACD11 homolog protein [Brachypodium distachyon]	RecName: Full=ACD11 homolog protein {ECO:0000303|PubMed:18657186}; AltName: Full=Probable ceramide-1-phosphate transfer protein {ECO:0000305};	SubName: Full=Uncharacterized protein {ECO:0000313|EMBL:KQK13606.1};	Uncharacterized conserved protein	GO:0005737,cytoplasm; GO:0005634,nucleus; GO:0120013,intermembrane lipid transfer activity	Glycolipid transfer protein (GLTP)
TRINITY_DN10834_c0_g2_i8.path2	1.8	3.1	2.66	6.45	4.07	8.07	47	100	71	166	132	253	2.047	1.034	0.000578253	0.00502625	up	4A	270110562	270113172	-	TRINITY_DN10834_c0_g2_i8	--	K08051 pleckstrin homology domain containing family A member 8 | (RefSeq) glycolipid transfer protein (A)	PREDICTED: ACD11 homolog protein [Brachypodium distachyon]	RecName: Full=ACD11 homolog protein {ECO:0000303|PubMed:18657186}; AltName: Full=Probable ceramide-1-phosphate transfer protein {ECO:0000305};	SubName: Full=Uncharacterized protein {ECO:0000313|EMBL:KQK13606.1};	Uncharacterized conserved protein	GO:0005737,cytoplasm; GO:0005634,nucleus; GO:0120013,intermembrane lipid transfer activity	Glycolipid transfer protein (GLTP)
TRINITY_DN108350_c0_g1_i1.path1	5.83	7.21	7.13	4.15	2.86	4.47	64	98	80	45	39	59	0.475	-1.074	0.000856013	0.00699756	down	6C	498453280	498453972	+	TRINITY_DN108350_c0_g1_i1	--	--	--	--	--	--	--	--
TRINITY_DN10837_c0_g1_i1.path1	2.27	1.53	2.84	0.58	0.71	0.21	36	30	46	9	14	4	0.189	-2.4	1.92347e-05	0.000271733	down	3D	349181692	349182871	-	TRINITY_DN10837_c0_g1_i1	--	K03695 ATP-dependent Clp protease ATP-binding subunit ClpB | (RefSeq) chaperone protein ClpB1-like (A)	heat shock protein, partial [Triticum turgidum subsp. durum]	RecName: Full=Chaperone protein ClpB1; AltName: Full=ATP-dependent Clp protease ATP-binding subunit ClpB homolog 1; AltName: Full=Casein lytic proteinase B1; AltName: Full=Heat shock protein 101;	SubName: Full=Heat shock protein {ECO:0000313|EMBL:ALV82276.1}; Flags: Fragment;	Chaperone HSP104 and related ATP-dependent Clp proteases	GO:0005829,cytosol; GO:0005634,nucleus; GO:0005524,ATP binding; GO:0034605,cellular response to heat; GO:0019538,protein metabolic process	AAA domain (Cdc48 subfamily)
TRINITY_DN108377_c0_g1_i1.path1	0.24	0.38	0.46	1.56	1.81	2.36	2	4	4	13	19	24	4.42	2.144	0.00678117	0.0374718	up	4C	47185724	47186256	+	TRINITY_DN108377_c0_g1_i1	--	--	--	--	--	--	--	--
TRINITY_DN10840_c0_g2_i3.path1	5.95	6.65	3.51	16.47	13.22	17.28	169	234	102	462	467	591	2.46	1.299	1.5517e-08	4.40124e-07	up	3D	306380706	306385407	+	TRINITY_DN10840_c0_g2_i3	--	--	--	--	--	--	--	--
TRINITY_DN10840_c0_g2_i3.path2	4.76	7.35	2.79	19.07	16.3	17.49	135	258	81	534	575	597	3.017	1.593	8.54843e-10	3.09533e-08	up	3A	57266628	57271390	-	TRINITY_DN10840_c0_g2_i3	--	--	--	--	--	--	--	--
TRINITY_DN10840_c0_g3_i1.path1	0	0	0.3	32.75	17.33	19.96	0	0	1	105	70	78	192.656	7.59	1.11623e-09	3.95759e-08	up	1D	361371348	361371552	+	TRINITY_DN10840_c0_g3_i1	--	K14497 protein phosphatase 2C [EC:3.1.3.16] | (RefSeq) LOC109763521; probable protein phosphatase 2C 8 (A)	probable protein phosphatase 2C 8 [Aegilops tauschii subsp. tauschii]	RecName: Full=Probable protein phosphatase 2C 8; Short=OsPP2C08; EC=3.1.3.16;	SubName: Full=Uncharacterized protein {ECO:0000313|EnsemblPlants:TRIAE_CS42_3B_TGACv1_222632_AA0768310.1};	Serine/threonine protein phosphatase	GO:0046872,metal ion binding; GO:0004722,protein serine/threonine phosphatase activity	--
TRINITY_DN10840_c1_g1_i1.path1	0	0	0	7.99	2.9	7.67	0	0	0	59	27	69	226.591	7.824	1.24287e-09	4.36429e-08	up	1A	378037645	378038116	-	TRINITY_DN10840_c1_g1_i1	--	K14497 protein phosphatase 2C [EC:3.1.3.16] | (RAP-DB) Os05g0572700; Similar to protein phosphatase 2C ABI1. (A)	Os05g0572700 [Oryza sativa Japonica Group]	RecName: Full=Probable protein phosphatase 2C 51; Short=OsPP2C51; EC=3.1.3.16;	SubName: Full=Os05g0572700 protein {ECO:0000313|EMBL:BAS95442.1};	Serine/threonine protein phosphatase	GO:0046872,metal ion binding; GO:0004722,protein serine/threonine phosphatase activity	Protein phosphatase 2C
TRINITY_DN108413_c0_g1_i1.path1	3.12	3.74	2.73	1.63	1.82	1.43	29	43	26	15	21	16	0.43	-1.218	0.0094878	0.0486921	down	5C	110900399	110900985	-	TRINITY_DN108413_c0_g1_i1	--	--	protein GLUTAMINE DUMPER 3 [Setaria italica]	RecName: Full=Protein GLUTAMINE DUMPER 3; AltName: Full=Protein LESS SUSCEPTIBLE TO BSCTV 1; Short=Protein LBS1;	SubName: Full=Uncharacterized protein {ECO:0000313|EnsemblPlants:HORVU4Hr1G013760.1};	--	GO:0016021,integral component of membrane; GO:0006865,amino acid transport; GO:0019048,modulation by virus of host morphology or physiology; GO:0080143,regulation of amino acid export; GO:0009615,response to virus; GO:0032940,secretion by cell	--
TRINITY_DN10843_c0_g1_i2.path2	16.74	15.75	9.65	46	48.79	32.29	273	318	161	741	990	634	2.57	1.362	1.42824e-08	4.07792e-07	up	5D	393577214	393578330	+	TRINITY_DN10843_c0_g1_i2	--	K09338 homeobox-leucine zipper protein | (RefSeq) LOC109733231; homeobox-leucine zipper protein HOX4-like (A)	homeobox-leucine zipper protein HOX4-like [Aegilops tauschii subsp. tauschii]	RecName: Full=Homeobox-leucine zipper protein HOX4; AltName: Full=HD-ZIP protein HOX4; AltName: Full=Homeodomain transcription factor HOX4; AltName: Full=OsHox4;	SubName: Full=Uncharacterized protein {ECO:0000313|EnsemblPlants:TRIAE_CS42_5BL_TGACv1_405891_AA1337090.2};	Transcription factor HEX, contains HOX and HALZ domains	GO:0005634,nucleus; GO:0003700,DNA-binding transcription factor activity; GO:0043565,sequence-specific DNA binding; GO:0006351,transcription, DNA-templated	Homeobox associated leucine zipper
TRINITY_DN10843_c1_g1_i1.path1	0.16	0.55	0.15	5.26	4.39	4.32	3	13	3	99	104	99	13.27	3.73	3.10416e-14	2.23362e-12	up	1D	449497073	449498275	-	TRINITY_DN10843_c1_g1_i1	--	K09338 homeobox-leucine zipper protein | (RefSeq) homeobox-leucine zipper protein ATHB-16 (A)	homeobox-leucine zipper protein HOX13-like [Aegilops tauschii subsp. tauschii]	RecName: Full=Homeobox-leucine zipper protein HOX13; AltName: Full=HD-ZIP protein HOX13; AltName: Full=Homeodomain transcription factor HOX13; AltName: Full=OsHox13;	SubName: Full=Uncharacterized protein {ECO:0000313|EnsemblPlants:TRIAE_CS42_4AL_TGACv1_288479_AA0949810.1};	Transcription factor HEX, contains HOX and HALZ domains	GO:0005634,nucleus; GO:0003700,DNA-binding transcription factor activity; GO:0043565,sequence-specific DNA binding; GO:0006351,transcription, DNA-templated	Homeobox associated leucine zipper
TRINITY_DN10843_c1_g1_i1.path2	0.31	0.21	0.15	3.34	4.46	4.22	6	5	3	63	106	97	15.025	3.909	9.20127e-14	6.18878e-12	up	3D	463109985	463111191	-	TRINITY_DN10843_c1_g1_i1	--	K09338 homeobox-leucine zipper protein | (RefSeq) homeobox-leucine zipper protein ATHB-16 (A)	homeobox-leucine zipper protein HOX13-like [Aegilops tauschii subsp. tauschii]	RecName: Full=Homeobox-leucine zipper protein HOX13; AltName: Full=HD-ZIP protein HOX13; AltName: Full=Homeodomain transcription factor HOX13; AltName: Full=OsHox13;	SubName: Full=Uncharacterized protein {ECO:0000313|EnsemblPlants:TRIAE_CS42_4AL_TGACv1_288479_AA0949810.1};	Transcription factor HEX, contains HOX and HALZ domains	GO:0005634,nucleus; GO:0003700,DNA-binding transcription factor activity; GO:0043565,sequence-specific DNA binding; GO:0006351,transcription, DNA-templated	Homeobox associated leucine zipper
TRINITY_DN108458_c0_g1_i1.path1	0.15	0.12	0	1.21	1.68	1.73	1	1	0	8	14	14	14.346	3.843	0.00419787	0.02554	up	7C	66841863	66842286	-	TRINITY_DN108458_c0_g1_i1	--	--	--	--	--	--	--	--
TRINITY_DN108466_c0_g1_i1.path1	24.06	23.28	19.38	5.76	3.1	9.3	131	157	108	31	21	61	0.226	-2.144	2.71733e-10	1.06508e-08	down	7C	286036345	286036866	+	TRINITY_DN108466_c0_g1_i1	--	--	--	--	--	--	--	--
TRINITY_DN108483_c0_g1_i1.path1	8.19	18.42	15.44	2.96	2.19	6.8	42	117	81	15	14	42	0.236	-2.08	1.9598e-06	3.572e-05	down	3C	522782191	522782514	+	TRINITY_DN108483_c0_g1_i1	--	--	hypothetical protein TAA_ctg0382b.00050.1 [Triticum aestivum]	--	SubName: Full=Uncharacterized protein {ECO:0000313|EMBL:CBH32547.1, ECO:0000313|EnsemblPlants:TRIAE_CS42_3B_TGACv1_220588_AA0709790.1};	--	GO:0003824,catalytic activity	--
TRINITY_DN108489_c0_g1_i1.path1	41.36	41.09	42.63	18.78	18.13	18.94	165	203	174	74	90	91	0.375	-1.416	3.49032e-09	1.12867e-07	down	6C	39415636	39415887	-	TRINITY_DN108489_c0_g1_i1	--	--	--	--	--	--	--	--
TRINITY_DN108493_c0_g1_i1.path1	5.15	4.99	5.48	23.05	21.34	24.71	45	54	49	199	232	260	3.716	1.894	1.13807e-13	7.55058e-12	up	4D	389035397	389035948	-	TRINITY_DN108493_c0_g1_i1	--	--	--	--	--	--	--	--
TRINITY_DN108519_c0_g1_i1.path1	2.36	3.46	1.98	7.98	7.6	5.98	21	38	18	70	84	64	2.336	1.224	0.00139068	0.010392	up	1C	151697900	151698460	+	TRINITY_DN108519_c0_g1_i1	--	--	--	--	--	--	--	--
TRINITY_DN10854_c0_g1_i7.path1	5.98	4.51	4.24	0.8	1.01	0.68	196	183	142	26	41	27	0.143	-2.805	2.89278e-20	4.02454e-18	down	6C	139811985	139816563	-	TRINITY_DN10854_c0_g1_i7	--	--	--	--	--	--	--	--
TRINITY_DN108551_c0_g1_i1.path1	15.91	15.56	10.07	4.08	4.86	6.7	71	86	46	18	27	36	0.318	-1.655	1.0263e-05	0.000155456	down	5C	592886997	592887278	-	TRINITY_DN108551_c0_g1_i1	--	--	--	--	--	--	--	--
TRINITY_DN108559_c0_g1_i2.path1	32.84	30.49	40.88	23.27	17.01	20.31	380	437	484	266	245	283	0.486	-1.042	1.84716e-06	3.39631e-05	down	4D	219145019	219145749	-	TRINITY_DN108559_c0_g1_i2	--	--	--	--	--	--	--	--
TRINITY_DN108606_c0_g1_i1.path1	0.33	0.4	0.38	2.3	1.38	1.1	6	9	7	41	31	24	3.621	1.857	0.00190838	0.0135231	up	1C	14855095	14856236	-	TRINITY_DN108606_c0_g1_i1	--	--	--	--	--	--	--	--
TRINITY_DN108644_c0_g1_i1.path1	0.15	0.6	1.02	6.67	2.53	8.7	1	5	7	44	21	70	8.289	3.051	6.68529e-06	0.000106677	up	6A	306727985	306728406	-	TRINITY_DN108644_c0_g1_i1	--	--	--	--	--	--	--	--
TRINITY_DN108651_c0_g1_i1.path1	0.71	0	0.46	3.37	2.1	11.83	3	0	2	14	11	60	12.452	3.638	0.000167299	0.00175022	up	4D	380875381	380875646	-	TRINITY_DN108651_c0_g1_i1	--	--	--	--	--	--	--	--
TRINITY_DN10873_c0_g2_i1.path1	2.86	11.25	11.05	109.27	16.52	208.41	25	122	99	945	180	2197	10.883	3.444	0.00066558	0.00565612	up	5D	497681381	497682023	+	TRINITY_DN10873_c0_g2_i1	--	K20769 fatty acid omega-hydroxylase [EC:1.14.-.-] | (RefSeq) cytochrome P450 94A2-like (A)	unnamed protein product [Triticum aestivum]	RecName: Full=Subtilisin-chymotrypsin inhibitor-2A; Short=CI-2A;	SubName: Full=Uncharacterized protein {ECO:0000313|EMBL:CDM81428.1};	--	GO:0004867,serine-type endopeptidase inhibitor activity; GO:0009611,response to wounding	Potato inhibitor I family
TRINITY_DN108743_c0_g1_i1.path1	16.53	9.53	15	4.18	9.17	5.72	84	60	78	21	58	35	0.392	-1.35	0.000540992	0.00475147	down	6A	336860386	336860939	+	TRINITY_DN108743_c0_g1_i1	--	K04733 interleukin-1 receptor-associated kinase 4 [EC:2.7.11.1] | (RefSeq) LOC109749708; cysteine-rich receptor-like protein kinase 10 isoform X1 (A)	cysteine-rich receptor-like protein kinase 10 isoform X1 [Aegilops tauschii subsp. tauschii]	RecName: Full=Putative serine/threonine-protein kinase receptor; EC=2.7.11.1; AltName: Full=S-receptor kinase; Short=SRK; Flags: Precursor;	SubName: Full=Uncharacterized protein {ECO:0000313|EnsemblPlants:TRIAE_CS42_1BL_TGACv1_030828_AA0101690.1};	--	GO:0016021,integral component of membrane; GO:0005886,plasma membrane; GO:0009506,plasmodesma; GO:0005773,vacuole; GO:0005524,ATP binding; GO:0042802,identical protein binding; GO:0004674,protein serine/threonine kinase activity; GO:0031625,ubiquitin protein ligase binding; GO:0060320,rejection of self pollen	Protein kinase domain
TRINITY_DN108748_c0_g1_i1.path1	0	0	0	6.1	2.13	5.61	0	0	0	25	11	28	93.752	6.551	2.4051e-06	4.29559e-05	up	5D	58317672	58317933	-	TRINITY_DN108748_c0_g1_i1	--	--	--	--	--	--	--	--
TRINITY_DN108748_c0_g1_i1.path2	0.24	0.2	0	3.95	3.53	8.71	1	1	0	16	18	43	30.213	4.917	5.41108e-05	0.000666741	up	5A	88023688	88023946	-	TRINITY_DN108748_c0_g1_i1	--	--	--	--	--	--	--	--
TRINITY_DN108761_c0_g1_i1.path2	1.96	5.54	8.46	0.66	0.66	2.44	12	42	53	4	5	18	0.194	-2.365	0.000249033	0.00246303	down	2D	299207890	299208363	+	TRINITY_DN108761_c0_g1_i1	--	K04733 interleukin-1 receptor-associated kinase 4 [EC:2.7.11.1] | (RefSeq) LOC109766241; cysteine-rich receptor-like protein kinase 6 (A)	predicted protein [Hordeum vulgare subsp. vulgare]	RecName: Full=Cysteine-rich receptor-like protein kinase 6 {ECO:0000305}; Short=Cysteine-rich RLK6 {ECO:0000305}; EC=2.7.11.- {ECO:0000305}; Flags: Precursor;	SubName: Full=Uncharacterized protein {ECO:0000313|EnsemblPlants:HORVU2Hr1G044520.7};	--	GO:0016021,integral component of membrane; GO:0005886,plasma membrane; GO:0005524,ATP binding; GO:0004672,protein kinase activity; GO:0004674,protein serine/threonine kinase activity; GO:0042742,defense response to bacterium	--
TRINITY_DN108766_c0_g1_i1.path1	1.95	2.1	2.63	0.38	0.75	0.92	21	28	29	4	10	12	0.258	-1.952	0.000827577	0.006797	down	4D	271580443	271581123	+	TRINITY_DN108766_c0_g1_i1	--	--	--	--	--	--	--	--
TRINITY_DN108775_c0_g1_i1.path1	9.83	5.1	7.55	0	1.32	1.55	42	27	33	0	7	8	0.11	-3.187	1.24773e-06	2.3865e-05	down	4A	408891229	408891498	+	TRINITY_DN108775_c0_g1_i1	--	--	gibberellin 20 oxidase 2-like [Aegilops tauschii subsp. tauschii]	--	SubName: Full=Uncharacterized protein {ECO:0000313|EnsemblPlants:TRIAE_CS42_3DL_TGACv1_249609_AA0852340.1};	--	GO:0046872,metal ion binding; GO:0016491,oxidoreductase activity	--
TRINITY_DN108775_c0_g1_i1.path2	5.44	2.1	4.16	0	0	1.18	23	11	18	0	0	6	0.084	-3.569	0.000259391	0.00254826	down	4D	334508519	334508785	-	TRINITY_DN108775_c0_g1_i1	--	--	gibberellin 20 oxidase 2-like [Aegilops tauschii subsp. tauschii]	--	SubName: Full=Uncharacterized protein {ECO:0000313|EnsemblPlants:TRIAE_CS42_3DL_TGACv1_249609_AA0852340.1};	--	GO:0046872,metal ion binding; GO:0016491,oxidoreductase activity	--
TRINITY_DN108775_c0_g1_i1.path3	7.25	4.35	2.74	0	0.94	0	31	23	12	0	5	0	0.059	-4.078	1.76278e-05	0.000251704	down	3C	631336255	631336524	+	TRINITY_DN108775_c0_g1_i1	--	--	gibberellin 20 oxidase 2-like [Aegilops tauschii subsp. tauschii]	--	SubName: Full=Uncharacterized protein {ECO:0000313|EnsemblPlants:TRIAE_CS42_3DL_TGACv1_249609_AA0852340.1};	--	GO:0046872,metal ion binding; GO:0016491,oxidoreductase activity	--
TRINITY_DN108784_c0_g1_i1.path2	2.29	6.92	1.4	37.61	20.44	67.18	8	30	5	130	89	283	9.724	3.282	4.02014e-12	2.1349e-10	up	2D	61849040	61849358	-	TRINITY_DN108784_c0_g1_i1	--	K00512 steroid 17alpha-monooxygenase / 17alpha-hydroxyprogesterone deacetylase [EC:1.14.14.19 1.14.14.32] | (RefSeq) isoflavone 2'-hydroxylase (A)	isoflavone 2'-hydroxylase-like [Aegilops tauschii subsp. tauschii]	RecName: Full=Cytochrome P450 81E8 {ECO:0000303|PubMed:14617078}; EC=1.14.13.- {ECO:0000305};	SubName: Full=Uncharacterized protein {ECO:0000313|EnsemblPlants:TRIAE_CS42_2DL_TGACv1_160509_AA0551280.1};	Cytochrome P450 CYP2 subfamily	GO:0016021,integral component of membrane; GO:0020037,heme binding; GO:0005506,iron ion binding; GO:0004497,monooxygenase activity; GO:0016705,oxidoreductase activity, acting on paired donors, with incorporation or reduction of molecular oxygen	Cytochrome P450
TRINITY_DN108784_c0_g1_i1.path3	1.43	0.92	0.84	45.72	13.55	70.97	5	4	3	158	59	299	34.007	5.088	1.65563e-17	1.78172e-15	up	2A	256685844	256686162	+	TRINITY_DN108784_c0_g1_i1	--	K00512 steroid 17alpha-monooxygenase / 17alpha-hydroxyprogesterone deacetylase [EC:1.14.14.19 1.14.14.32] | (RefSeq) isoflavone 2'-hydroxylase (A)	isoflavone 2'-hydroxylase-like [Aegilops tauschii subsp. tauschii]	RecName: Full=Cytochrome P450 81E8 {ECO:0000303|PubMed:14617078}; EC=1.14.13.- {ECO:0000305};	SubName: Full=Uncharacterized protein {ECO:0000313|EnsemblPlants:TRIAE_CS42_2DL_TGACv1_160509_AA0551280.1};	Cytochrome P450 CYP2 subfamily	GO:0016021,integral component of membrane; GO:0020037,heme binding; GO:0005506,iron ion binding; GO:0004497,monooxygenase activity; GO:0016705,oxidoreductase activity, acting on paired donors, with incorporation or reduction of molecular oxygen	Cytochrome P450
TRINITY_DN108809_c0_g1_i1.path1	0.51	0.74	0.7	5.16	3.36	2.45	5	9	7	50	41	29	4.75	2.248	9.97856e-05	0.00112584	up	5D	435748835	435749551	-	TRINITY_DN108809_c0_g1_i1	--	--	--	--	--	--	--	--
TRINITY_DN10883_c0_g1_i1.path2	5.15	6.01	4.7	2.93	1.87	2.96	137	198	128	77	62	95	0.41	-1.286	1.41114e-06	2.66905e-05	down	1A	377572445	377576830	+	TRINITY_DN10883_c0_g1_i1	--	K09060 plant G-box-binding factor | (RefSeq) LOC109736901; common plant regulatory factor 1-like (A)	common plant regulatory factor 1-like [Aegilops tauschii subsp. tauschii]	RecName: Full=Common plant regulatory factor 1; Short=CPRF-1;	SubName: Full=Uncharacterized protein {ECO:0000313|EnsemblPlants:HORVU1Hr1G090030.9};	--	GO:0005634,nucleus; GO:0003677,DNA binding; GO:0003700,DNA-binding transcription factor activity; GO:0006351,transcription, DNA-templated	G-box binding protein MFMR
TRINITY_DN108839_c0_g1_i1.path1	5.72	4.54	4.81	14.94	10.41	15.18	57	56	49	147	129	182	2.254	1.172	4.46345e-05	0.000565399	up	1C	134174438	134175066	-	TRINITY_DN108839_c0_g1_i1	--	--	--	--	--	--	--	--
TRINITY_DN108851_c0_g1_i1.path1	3.33	3.77	3.1	1.69	1.07	1.11	20	28	19	10	8	8	0.317	-1.657	0.0051132	0.0298865	down	4D	400804081	400804459	+	TRINITY_DN108851_c0_g1_i1	--	--	--	--	--	--	--	--
TRINITY_DN108875_c0_g1_i1.path1	121.07	92.69	93.06	45.83	61.95	63.95	1583	1501	1245	592	1008	1007	0.469	-1.092	8.37113e-09	2.50037e-07	down	5C	133109173	133110215	+	TRINITY_DN108875_c0_g1_i1	--	--	--	--	--	--	--	--
TRINITY_DN108932_c0_g1_i1.path2	2.56	3.26	3.65	2.09	1.11	1.06	26	41	38	21	14	13	0.375	-1.415	0.00390823	0.0241208	down	7D	337187844	337188485	-	TRINITY_DN108932_c0_g1_i1	--	K04733 interleukin-1 receptor-associated kinase 4 [EC:2.7.11.1] | (RefSeq) U-box domain-containing protein 33-like (A)	U-box domain-containing protein 8 [Aegilops tauschii subsp. tauschii]	RecName: Full=U-box domain-containing protein 8; EC=2.3.2.27; AltName: Full=Plant U-box protein 8; AltName: Full=RING-type E3 ubiquitin transferase PUB8 {ECO:0000305};	RecName: Full=RING-type E3 ubiquitin transferase {ECO:0000256|SAAS:SAAS00702733}; EC=2.3.2.27 {ECO:0000256|SAAS:SAAS00702733};	FOG: Armadillo/beta-catenin-like repeats	GO:0005737,cytoplasm; GO:0005634,nucleus; GO:0004842,ubiquitin-protein transferase activity; GO:0016567,protein ubiquitination	--
TRINITY_DN108933_c0_g1_i1.path1	0	0.06	0.08	0.6	0.82	0.92	0	2	2	15	26	28	13.691	3.775	0.000103111	0.0011557	up	Chr00	41309110	41310710	-	TRINITY_DN108933_c0_g1_i1	--	--	hypothetical protein OsJ_34475 [Oryza sativa Japonica Group]	--	SubName: Full=Uncharacterized protein {ECO:0000313|EMBL:EAZ18935.1};	--	--	--
TRINITY_DN10894_c0_g1_i2.path2	2.34	1.32	2.12	0.81	1.06	0.72	105	73	97	36	59	39	0.378	-1.404	6.01213e-05	0.00072938	down	1A	262355693	262359940	-	TRINITY_DN10894_c0_g1_i2	--	--	uncharacterized protein LOC109741651 isoform X2 [Aegilops tauschii subsp. tauschii]	--	SubName: Full=Uncharacterized protein {ECO:0000313|EnsemblPlants:HORVU1Hr1G056170.1};	--	--	Protein of unknown function, DUF547
TRINITY_DN108986_c0_g1_i1.path1	7.84	5.77	5.18	2.1	3.34	2.11	34	31	23	9	18	11	0.341	-1.552	0.00310581	0.0200707	down	4A	76319964	76320237	-	TRINITY_DN108986_c0_g1_i1	--	--	--	--	--	--	--	--
TRINITY_DN10899_c0_g1_i2.path1	0.4	0.8	0.72	1.93	1.68	1.65	11	27	20	52	57	54	2.296	1.199	0.0051377	0.0299938	up	3D	14714903	14716959	+	TRINITY_DN10899_c0_g1_i2	--	K01206 alpha-L-fucosidase [EC:3.2.1.51] | (RefSeq) alpha-L-fucosidase 3-like (A)	unnamed protein product [Triticum aestivum]	RecName: Full=GDSL esterase/lipase At5g45910; EC=3.1.1.-; AltName: Full=Extracellular lipase At5g45910; Flags: Precursor;	SubName: Full=Uncharacterized protein {ECO:0000313|EnsemblPlants:HORVU3Hr1G030080.6};	--	GO:0005576,extracellular region; GO:0016788,hydrolase activity, acting on ester bonds; GO:0016042,lipid catabolic process	GDSL-like Lipase/Acylhydrolase
TRINITY_DN108995_c0_g1_i1.path1	21.76	16.18	19.21	7.15	4.91	10.46	114	105	103	37	32	66	0.327	-1.611	9.29569e-07	1.83802e-05	down	4A	456815811	456816216	-	TRINITY_DN108995_c0_g1_i1	--	K19882 O-palmitoleoyl-L-serine hydrolase [EC:3.1.1.98] | (RefSeq) LOC109735054; pectin acetylesterase 5-like (A)	pectin acetylesterase 5-like [Aegilops tauschii subsp. tauschii]	RecName: Full=Pectin acetylesterase 10 {ECO:0000303|PubMed:25115560}; EC=3.1.1.- {ECO:0000305}; Flags: Precursor;	RecName: Full=Pectin acetylesterase {ECO:0000256|RuleBase:RU363114}; EC=3.1.1.- {ECO:0000256|RuleBase:RU363114};	Pectin acetylesterase and similar proteins	GO:0005576,extracellular region; GO:0009505,plant-type cell wall; GO:0052793,pectin acetylesterase activity; GO:0071555,cell wall organization	Pectinacetylesterase
TRINITY_DN109022_c0_g1_i1.path1	0.93	1.66	0.2	11.98	20.09	18.28	9	20	2	115	243	214	14.982	3.905	2.38836e-20	3.34182e-18	up	7D	2685599	2686330	-	TRINITY_DN109022_c0_g1_i1	--	--	--	--	--	--	--	--
TRINITY_DN10903_c0_g2_i2.path1	1.66	2.07	2.24	0.27	1.08	1.46	37	57	51	6	30	39	0.395	-1.34	0.00509992	0.0298303	down	7A	117040839	117042242	-	TRINITY_DN10903_c0_g2_i2	--	--	--	--	--	--	--	--
TRINITY_DN10903_c0_g2_i2.path2	2.88	2.65	1.89	1.32	1.19	1.05	64	73	43	29	33	28	0.405	-1.305	0.000446359	0.00405614	down	7D	278723843	278725247	+	TRINITY_DN10903_c0_g2_i2	--	--	--	--	--	--	--	--
TRINITY_DN10905_c0_g1_i6.path2	2.29	3.58	1.95	7	4.72	11.2	62	120	54	187	159	365	2.446	1.29	3.17474e-05	0.000420572	up	5D	415857692	415862317	-	TRINITY_DN10905_c0_g1_i6	--	K00924 kinase [EC:2.7.1.-] | (RefSeq) probable serine/threonine-protein kinase PBL19 (A)	predicted protein [Hordeum vulgare subsp. vulgare]	RecName: Full=Probable serine/threonine-protein kinase PBL19 {ECO:0000305}; EC=2.7.11.1 {ECO:0000305}; AltName: Full=PBS1-like protein 19 {ECO:0000303|PubMed:20413097};	SubName: Full=Uncharacterized protein {ECO:0000313|EnsemblPlants:HORVU5Hr1G082310.3};	Serine/threonine protein kinase	GO:0005886,plasma membrane; GO:0005524,ATP binding; GO:0004675,transmembrane receptor protein serine/threonine kinase activity; GO:0007166,cell surface receptor signaling pathway; GO:0006952,defense response; GO:0006468,protein phosphorylation	Protein tyrosine kinase
TRINITY_DN10906_c0_g1_i1.path1	56.95	50.43	55.06	27.86	27.58	33.34	1583	1736	1566	765	954	1116	0.457	-1.13	3.6568e-12	1.95329e-10	down	5D	300074516	300078393	-	TRINITY_DN10906_c0_g1_i1	--	K01640 hydroxymethylglutaryl-CoA lyase [EC:4.1.3.4] | (RefSeq) hydroxymethylglutaryl-CoA lyase, mitochondrial-like (A)	PREDICTED: hydroxymethylglutaryl-CoA lyase, mitochondrial-like [Brachypodium distachyon]	RecName: Full=Hydroxymethylglutaryl-CoA lyase, mitochondrial; Short=HL; Short=HMG-CoA lyase; EC=4.1.3.4; AltName: Full=3-hydroxy-3-methylglutarate-CoA lyase;	SubName: Full=Uncharacterized protein {ECO:0000313|EnsemblPlants:BRADI4G43510.2};	Hydroxymethylglutaryl-CoA lyase	GO:0005759,mitochondrial matrix; GO:0005739,mitochondrion; GO:0004419,hydroxymethylglutaryl-CoA lyase activity; GO:0046872,metal ion binding; GO:0046951,ketone body biosynthetic process	HMGL-like
TRINITY_DN10906_c0_g1_i1.path2	45.41	39.73	47.85	25.65	24.03	27.48	1265	1371	1364	706	833	922	0.485	-1.044	1.10474e-09	3.92063e-08	down	5A	333410453	333414271	-	TRINITY_DN10906_c0_g1_i1	--	K01640 hydroxymethylglutaryl-CoA lyase [EC:4.1.3.4] | (RefSeq) LOC109756136; hydroxymethylglutaryl-CoA lyase, mitochondrial-like (A)	hydroxymethylglutaryl-CoA lyase, mitochondrial-like [Aegilops tauschii subsp. tauschii]	RecName: Full=Hydroxymethylglutaryl-CoA lyase, mitochondrial; Short=HL; Short=HMG-CoA lyase; EC=4.1.3.4; AltName: Full=3-hydroxy-3-methylglutarate-CoA lyase;	SubName: Full=Uncharacterized protein {ECO:0000313|EnsemblPlants:TRIAE_CS42_5AL_TGACv1_376171_AA1233180.1};	Hydroxymethylglutaryl-CoA lyase	GO:0005759,mitochondrial matrix; GO:0005739,mitochondrion; GO:0004419,hydroxymethylglutaryl-CoA lyase activity; GO:0046872,metal ion binding; GO:0046951,ketone body biosynthetic process	HMGL-like
TRINITY_DN109074_c0_g1_i1.path1	8.32	3.83	4.63	1.99	2.95	2.67	93	53	53	22	41	36	0.382	-1.387	0.000494232	0.00440582	down	2D	354038759	354039984	+	TRINITY_DN109074_c0_g1_i1	--	--	--	--	--	--	--	--
TRINITY_DN109074_c0_g1_i1.path2	58.69	39.29	31.61	17.6	26.14	19.35	655	543	361	194	363	260	0.412	-1.281	2.80327e-07	6.18451e-06	down	3A	393017877	393019101	+	TRINITY_DN109074_c0_g1_i1	--	--	--	--	--	--	--	--
TRINITY_DN109085_c0_g1_i1.path1	2.14	1.48	1.34	4.48	5.4	8.74	14	12	9	29	44	69	3.149	1.655	0.000885783	0.00719271	up	7A	371647604	371648017	-	TRINITY_DN109085_c0_g1_i1	--	--	--	--	--	--	--	--
TRINITY_DN109092_c0_g1_i1.path1	4.86	3.34	3.87	1.46	1.01	2.39	27	23	22	8	7	16	0.335	-1.576	0.00635189	0.0355618	down	4C	96983303	96983653	-	TRINITY_DN109092_c0_g1_i1	--	--	--	--	--	--	--	--
TRINITY_DN10916_c1_g1_i3.path1	0.79	0.47	0.2	1.81	1.04	1.97	19	14	5	43	31	57	2.768	1.469	0.00560121	0.0321433	up	2C	556668778	556671384	-	TRINITY_DN10916_c1_g1_i3	--	K06670 cohesin complex subunit SCC1 | (RefSeq) sister chromatid cohesion 1 protein 1-like (A)	hypothetical protein BRADI_2g15127v3 [Brachypodium distachyon]	--	SubName: Full=Uncharacterized protein {ECO:0000313|EnsemblPlants:HORVU1Hr1G062190.16};	--	--	--
TRINITY_DN10918_c1_g1_i1.path1	2.78	2.87	1.09	8.54	5.09	11.8	25	32	10	76	57	128	3.159	1.66	9.35289e-05	0.00106643	up	4D	260725750	260726318	+	TRINITY_DN10918_c1_g1_i1	--	--	--	--	--	--	--	--
TRINITY_DN10918_c1_g2_i1.path1	0	0.81	0	3.06	4.25	4.6	0	4	0	12	21	22	11.518	3.526	0.000928327	0.00747267	up	4D	260637127	260637971	-	TRINITY_DN10918_c1_g2_i1	--	--	--	--	--	--	--	--
TRINITY_DN109257_c0_g1_i1.path2	6.91	9.02	7.35	1.23	2.12	1.86	34	55	37	6	13	11	0.19	-2.394	1.2113e-06	2.32961e-05	down	3A	165218494	165220659	+	TRINITY_DN109257_c0_g1_i1	--	--	--	--	--	--	--	--
TRINITY_DN10927_c1_g1_i1.path2	0.45	0.62	1.06	0.32	0.11	0.17	13	22	31	9	4	6	0.233	-2.105	0.0017906	0.0128168	down	2C	447192707	447194519	-	TRINITY_DN10927_c1_g1_i1	--	--	--	--	SubName: Full=Uncharacterized protein {ECO:0000313|EnsemblPlants:TRIAE_CS42_1AL_TGACv1_002645_AA0044190.1};	--	--	--
TRINITY_DN10927_c1_g2_i1.path2	0.37	0.46	0.61	0	0.05	0.21	13	20	22	0	2	9	0.15	-2.732	0.00107974	0.00846072	down	2C	447190157	447192850	-	TRINITY_DN10927_c1_g2_i1	--	--	hypothetical protein OsI_15342 [Oryza sativa Indica Group]	--	SubName: Full=Uncharacterized protein {ECO:0000313|EnsemblPlants:TRIAE_CS42_3AL_TGACv1_194297_AA0630670.1};	--	--	--
TRINITY_DN109281_c0_g1_i1.path1	85.59	50.22	52.98	40.97	38.72	30.13	611	444	387	289	344	259	0.491	-1.028	3.12502e-05	0.000415114	down	4C	519322099	519322549	-	TRINITY_DN109281_c0_g1_i1	--	--	--	--	--	--	--	--
TRINITY_DN109291_c0_g1_i1.path1	154.06	190.6	130.2	62.6	80.69	92.4	695	1065	601	279	453	502	0.418	-1.257	6.32754e-11	2.74152e-09	down	4D	14349148	14349432	-	TRINITY_DN109291_c0_g1_i1	--	K14709 solute carrier family 39 (zinc transporter), member 1/2/3 | (RefSeq) LOC109772245; zinc transporter 8-like (A)	zinc transporter 8-like [Aegilops tauschii subsp. tauschii]	RecName: Full=Zinc transporter 8; AltName: Full=ZRT/IRT-like protein 8; Short=OsZIP8; Flags: Precursor;	SubName: Full=Zinc transporter 1 {ECO:0000313|EMBL:EMT08251.1, ECO:0000313|EnsemblPlants:EMT08251};	Fe2+/Zn2+ regulated transporter	GO:0016021,integral component of membrane; GO:0005886,plasma membrane; GO:0005385,zinc ion transmembrane transporter activity; GO:0071577,zinc ion transmembrane transport; GO:0006829,zinc ion transport	ZIP Zinc transporter
TRINITY_DN109291_c0_g1_i1.path2	67.18	98.06	84.35	34.9	30.92	33.43	302	546	388	155	173	181	0.335	-1.579	4.48762e-14	3.17601e-12	down	Chr00	41765253	41765536	-	TRINITY_DN109291_c0_g1_i1	--	K14709 solute carrier family 39 (zinc transporter), member 1/2/3 | (RefSeq) LOC109772245; zinc transporter 8-like (A)	zinc transporter 8-like [Aegilops tauschii subsp. tauschii]	RecName: Full=Zinc transporter 8; AltName: Full=ZRT/IRT-like protein 8; Short=OsZIP8; Flags: Precursor;	SubName: Full=Uncharacterized protein {ECO:0000313|EMBL:JAE88646.1};	Fe2+/Zn2+ regulated transporter	GO:0016021,integral component of membrane; GO:0005886,plasma membrane; GO:0005385,zinc ion transmembrane transporter activity; GO:0071577,zinc ion transmembrane transport; GO:0006829,zinc ion transport	ZIP Zinc transporter
TRINITY_DN109298_c0_g1_i1.path1	0.28	1.14	0.55	2.01	2.73	8.7	1	5	2	7	12	37	5.514	2.463	0.00768329	0.0413545	up	7C	653786320	653786542	+	TRINITY_DN109298_c0_g1_i1	--	--	--	--	--	--	--	--
TRINITY_DN109309_c0_g1_i1.path1	5.23	9.36	5.11	1.15	2.01	3.21	23	51	23	5	11	17	0.274	-1.869	0.000704988	0.00594154	down	5C	232943065	232943342	+	TRINITY_DN109309_c0_g1_i1	--	--	--	--	--	--	--	--
TRINITY_DN10935_c0_g1_i1.path1	0	0.13	0	4.1	3.88	1.16	0	2	0	52	62	18	56.156	5.811	9.81836e-07	1.93145e-05	up	3C	10695291	10696181	-	TRINITY_DN10935_c0_g1_i1	--	--	Patatin group A-3 [Triticum urartu]	RecName: Full=Bowman-Birk type proteinase inhibitor II-4; Flags: Fragment;	SubName: Full=Uncharacterized protein {ECO:0000313|EnsemblPlants:HORVU3Hr1G004250.6};	--	GO:0005576,extracellular region; GO:0004867,serine-type endopeptidase inhibitor activity	Bowman-Birk serine protease inhibitor family
TRINITY_DN10935_c0_g3_i1.path1	0	0.1	0.06	9.77	9.81	3.93	0	2	1	155	196	76	118.141	6.884	9.17762e-14	6.17856e-12	up	1C	422763867	422764965	+	TRINITY_DN10935_c0_g3_i1	--	--	unnamed protein product [Triticum aestivum]	RecName: Full=Bowman-Birk type proteinase inhibitor II-4; Flags: Fragment;	SubName: Full=Uncharacterized protein {ECO:0000313|EnsemblPlants:TRIAE_CS42_3DS_TGACv1_272792_AA0925300.2};	--	GO:0005576,extracellular region; GO:0004867,serine-type endopeptidase inhibitor activity	Bowman-Birk serine protease inhibitor family
TRINITY_DN109352_c0_g1_i1.path1	1.76	3.84	8.26	0.36	0.14	1.02	10	27	48	2	1	7	0.09	-3.474	1.13721e-05	0.000170532	down	2C	555339347	555339705	+	TRINITY_DN109352_c0_g1_i1	--	--	--	--	--	--	--	--
TRINITY_DN10936_c0_g4_i4.path1	12.21	9.09	6.62	3.62	3.85	3.19	191	176	106	56	75	60	0.323	-1.631	2.32772e-08	6.34179e-07	down	5A	469913932	469914919	-	TRINITY_DN10936_c0_g4_i4	--	--	--	--	--	--	--	--
TRINITY_DN109393_c0_g1_i1.path1	0.72	0	0.14	2.9	1.84	6.66	5	0	1	20	16	56	11.442	3.516	8.04173e-05	0.00093708	up	4A	266784445	266784885	+	TRINITY_DN109393_c0_g1_i1	--	K15718 linoleate 9S-lipoxygenase [EC:1.13.11.58] | (RefSeq) linoleate 9S-lipoxygenase 1 (A)	PREDICTED: linoleate 9S-lipoxygenase 1 [Brachypodium distachyon]	RecName: Full=Putative linoleate 9S-lipoxygenase 3; EC=1.13.11.58; AltName: Full=Lipoxygenase 3;	RecName: Full=Lipoxygenase {ECO:0000256|RuleBase:RU003975}; EC=1.13.11.- {ECO:0000256|RuleBase:RU003975};	--	GO:0046872,metal ion binding; GO:0016702,oxidoreductase activity, acting on single donors with incorporation of molecular oxygen, incorporation of two atoms of oxygen; GO:0031408,oxylipin biosynthetic process	--
TRINITY_DN10941_c0_g1_i4.path1	154.48	130.99	132.18	78.96	84.9	81.8	4739	4977	4149	2393	3241	3022	0.494	-1.017	1.03869e-10	4.33848e-09	down	3A	387572116	387577175	-	TRINITY_DN10941_c0_g1_i4	--	K00099 1-deoxy-D-xylulose-5-phosphate reductoisomerase [EC:1.1.1.267] | (RefSeq) 1-deoxy-D-xylulose 5-phosphate reductoisomerase, chloroplastic (A)	PREDICTED: 1-deoxy-D-xylulose 5-phosphate reductoisomerase, chloroplastic [Brachypodium distachyon]	RecName: Full=1-deoxy-D-xylulose 5-phosphate reductoisomerase, chloroplastic; Short=1-deoxyxylulose-5-phosphate reductoisomerase; Short=DXP reductoisomerase; EC=1.1.1.267; AltName: Full=2-C-methyl-D-erythritol 4-phosphate synthase; Flags: Precursor;	SubName: Full=Uncharacterized protein {ECO:0000313|EMBL:KQK02296.1, ECO:0000313|EnsemblPlants:BRADI2G00650.1};	--	GO:0009570,chloroplast stroma; GO:0030604,1-deoxy-D-xylulose-5-phosphate reductoisomerase activity; GO:0030145,manganese ion binding; GO:0070402,NADPH binding; GO:0051484,isopentenyl diphosphate biosynthetic process, methylerythritol 4-phosphate pathway involved in terpenoid biosynthetic process; GO:0046686,response to cadmium ion	1-deoxy-D-xylulose 5-phosphate reductoisomerase
TRINITY_DN10941_c0_g1_i4.path2	79.03	74.97	79.17	41.67	44.94	46.06	2442	2869	2503	1272	1728	1714	0.477	-1.067	2.88465e-12	1.56367e-10	down	1C	451838758	451843833	+	TRINITY_DN10941_c0_g1_i4	--	--	--	--	--	--	--	--
TRINITY_DN10941_c0_g1_i4.path3	151.5	128.75	134.64	70.46	72.46	74.64	4657	4902	4235	2140	2772	2763	0.44	-1.185	2.01553e-14	1.49347e-12	down	3C	28325841	28330956	+	TRINITY_DN10941_c0_g1_i4	--	K00099 1-deoxy-D-xylulose-5-phosphate reductoisomerase [EC:1.1.1.267] | (RefSeq) 1-deoxy-D-xylulose 5-phosphate reductoisomerase, chloroplastic (A)	PREDICTED: 1-deoxy-D-xylulose 5-phosphate reductoisomerase, chloroplastic [Brachypodium distachyon]	RecName: Full=1-deoxy-D-xylulose 5-phosphate reductoisomerase, chloroplastic; Short=1-deoxyxylulose-5-phosphate reductoisomerase; Short=DXP reductoisomerase; EC=1.1.1.267; AltName: Full=2-C-methyl-D-erythritol 4-phosphate synthase; Flags: Precursor;	SubName: Full=Uncharacterized protein {ECO:0000313|EMBL:KQK02296.1, ECO:0000313|EnsemblPlants:BRADI2G00650.1};	--	GO:0009570,chloroplast stroma; GO:0030604,1-deoxy-D-xylulose-5-phosphate reductoisomerase activity; GO:0030145,manganese ion binding; GO:0070402,NADPH binding; GO:0051484,isopentenyl diphosphate biosynthetic process, methylerythritol 4-phosphate pathway involved in terpenoid biosynthetic process; GO:0046686,response to cadmium ion	1-deoxy-D-xylulose 5-phosphate reductoisomerase
TRINITY_DN10944_c0_g1_i3.path1	14.6	14.88	13.69	6.91	8.32	8.56	571	721	548	267	405	403	0.463	-1.11	2.52422e-10	9.93118e-09	down	4D	208949665	208954628	+	TRINITY_DN10944_c0_g1_i3	--	K09480 digalactosyldiacylglycerol synthase [EC:2.4.1.241] | (RefSeq) LOC109763829; digalactosyldiacylglycerol synthase 1, chloroplastic-like (A)	predicted protein [Hordeum vulgare subsp. vulgare]	RecName: Full=Digalactosyldiacylglycerol synthase 1, chloroplastic; EC=2.4.1.241; Flags: Precursor;	SubName: Full=Predicted protein {ECO:0000313|EMBL:BAK01564.1};	--	GO:0009707,chloroplast outer membrane; GO:0043661,peribacteroid membrane; GO:0046481,digalactosyldiacylglycerol synthase activity; GO:0009877,nodulation	Glycosyl transferases group 1
TRINITY_DN10944_c0_g1_i3.path2	21.85	21	19.61	10.62	13	9.24	860	1024	790	413	637	438	0.445	-1.169	1.51652e-09	5.26458e-08	down	4A	203063640	203068620	+	TRINITY_DN10944_c0_g1_i3	--	K09480 digalactosyldiacylglycerol synthase [EC:2.4.1.241] | (RefSeq) LOC109763829; digalactosyldiacylglycerol synthase 1, chloroplastic-like (A)	predicted protein [Hordeum vulgare subsp. vulgare]	RecName: Full=Digalactosyldiacylglycerol synthase 1, chloroplastic; EC=2.4.1.241; Flags: Precursor;	SubName: Full=Predicted protein {ECO:0000313|EMBL:BAK01564.1};	--	GO:0009707,chloroplast outer membrane; GO:0043661,peribacteroid membrane; GO:0046481,digalactosyldiacylglycerol synthase activity; GO:0009877,nodulation	Glycosyl transferases group 1
TRINITY_DN109462_c0_g1_i2.path2	1.97	3.31	2.67	7.53	6.35	7.57	13	27	18	49	52	60	2.257	1.175	0.00515636	0.0300835	up	3A	15498968	15500031	-	TRINITY_DN109462_c0_g1_i2	--	K21776 protein lin-54 | (RefSeq) uncharacterized protein LOC109830026 (A)	calcium-binding protein P-like [Aegilops tauschii subsp. tauschii]	--	SubName: Full=Uncharacterized protein {ECO:0000313|EMBL:EMT05386.1, ECO:0000313|EnsemblPlants:EMT05386};	--	--	--
TRINITY_DN109481_c0_g1_i1.path3	3.84	5.72	4.47	11.65	10.79	11.4	26	48	31	78	91	93	2.027	1.019	0.00222563	0.0153419	up	Chr00	121645019	121645513	-	TRINITY_DN109481_c0_g1_i1	--	K09338 homeobox-leucine zipper protein | (RefSeq) homeobox-leucine zipper protein ROC9 (A)	exocyst complex component EXO70A1-like [Aegilops tauschii subsp. tauschii]	--	SubName: Full=Uncharacterized protein {ECO:0000313|EnsemblPlants:TRIAE_CS42_7DS_TGACv1_621599_AA2020500.1};	--	GO:0000145,exocyst; GO:0006887,exocytosis	Exo70 exocyst complex subunit
TRINITY_DN109519_c0_g1_i1.path1	3.14	3.98	4.1	1.48	1.26	2.87	30	47	40	14	15	33	0.417	-1.262	0.0059833	0.0338947	down	2D	487154256	487154858	+	TRINITY_DN109519_c0_g1_i1	--	--	--	--	--	--	--	--
TRINITY_DN10953_c0_g1_i2.path1	1.55	2.04	1.42	3.84	2.86	5.29	33	54	31	81	76	136	2	1	0.00318011	0.0204676	up	1C	443818846	443821775	+	TRINITY_DN10953_c0_g1_i2	--	K20784 arabinosyltransferase [EC:2.4.2.-] | (RefSeq) hypothetical protein (A)	PREDICTED: fruit protein pKIWI502-like [Brachypodium distachyon]	RecName: Full=Fruit protein pKIWI502;	SubName: Full=Uncharacterized protein {ECO:0000313|EMBL:KQK02454.1, ECO:0000313|EnsemblPlants:BRADI2G01530.1};	--	GO:0016491,oxidoreductase activity	Oxidoreductase NAD-binding domain
TRINITY_DN10953_c0_g1_i2.path2	1.58	2.56	1.36	5.7	2.81	5.26	34	68	30	121	75	136	2.098	1.069	0.00259287	0.0173679	up	3A	399239389	399242331	-	TRINITY_DN10953_c0_g1_i2	--	K20784 arabinosyltransferase [EC:2.4.2.-] | (RefSeq) hypothetical protein (A)	PREDICTED: fruit protein pKIWI502-like [Brachypodium distachyon]	RecName: Full=Fruit protein pKIWI502;	SubName: Full=Uncharacterized protein {ECO:0000313|EnsemblPlants:TRIAE_CS42_3AS_TGACv1_211520_AA0691040.1};	--	GO:0016491,oxidoreductase activity	Oxidoreductase NAD-binding domain
TRINITY_DN109548_c0_g1_i1.path1	3.21	4.78	4.9	2.08	1.85	2.8	39	72	61	25	28	41	0.436	-1.197	0.00161062	0.0117464	down	2C	299369020	299369787	-	TRINITY_DN109548_c0_g1_i1	--	K01674 carbonic anhydrase [EC:4.2.1.1] | (RefSeq) LOC109772606; alpha carbonic anhydrase 1, chloroplastic-like (A)	uncharacterized protein LOC109784223 [Aegilops tauschii subsp. tauschii]	--	SubName: Full=Uncharacterized protein {ECO:0000313|EnsemblPlants:TRIAE_CS42_4BL_TGACv1_320275_AA1033480.1};	FOG: Transposon-encoded proteins with TYA, reverse transcriptase, integrase domains in various combinations	--	gag-polypeptide of LTR copia-type
TRINITY_DN109604_c0_g1_i1.path1	3.17	4.88	2.67	10.63	7.98	9.8	22	42	19	73	69	82	2.226	1.155	0.00196537	0.0138625	up	7C	476347766	476348204	-	TRINITY_DN109604_c0_g1_i1	--	--	--	--	SubName: Full=Uncharacterized protein {ECO:0000313|EnsemblPlants:TRIAE_CS42_6BL_TGACv1_499766_AA1591270.1};	--	--	--
TRINITY_DN109633_c0_g1_i1.path1	38.69	36.55	28.16	88.1	99.05	68.52	188	220	140	423	599	401	2.098	1.069	2.51087e-06	4.46411e-05	up	6C	576741272	576741578	+	TRINITY_DN109633_c0_g1_i1	--	K04733 interleukin-1 receptor-associated kinase 4 [EC:2.7.11.1] | (RefSeq) probable serine/threonine-protein kinase PBL16 (A)	probable serine/threonine-protein kinase PBL16 [Setaria italica]	RecName: Full=Probable serine/threonine-protein kinase PBL16 {ECO:0000305}; EC=2.7.11.1 {ECO:0000305}; AltName: Full=PBS1-like protein 16 {ECO:0000303|PubMed:20413097};	SubName: Full=Uncharacterized protein {ECO:0000313|EMBL:KQK88980.1, ECO:0000313|EnsemblPlants:Si036160m};	Serine/threonine protein kinase	GO:0005886,plasma membrane; GO:0009506,plasmodesma; GO:0005524,ATP binding; GO:0004675,transmembrane receptor protein serine/threonine kinase activity; GO:0007166,cell surface receptor signaling pathway; GO:0006952,defense response; GO:0006468,protein phosphorylation	--
TRINITY_DN109664_c0_g1_i1.path1	7.47	8.11	6.17	2.03	1.85	3.82	26	35	22	7	8	16	0.296	-1.754	0.001482	0.0109679	down	7A	415281677	415281896	-	TRINITY_DN109664_c0_g1_i1	--	--	--	--	--	--	--	--
TRINITY_DN109687_c0_g1_i1.path1	8.1	8.86	6.68	27.51	16.63	31.24	45	61	38	151	115	209	2.665	1.414	3.71546e-06	6.33194e-05	up	6C	522193425	522193775	+	TRINITY_DN109687_c0_g1_i1	--	--	--	--	--	--	--	--
TRINITY_DN109762_c0_g1_i1.path1	0	0.1	0	2.03	0.71	1.25	0	1	0	16	7	12	26.797	4.744	0.00149244	0.0110285	up	6A	76040490	76040993	-	TRINITY_DN109762_c0_g1_i1	--	--	--	--	--	--	--	--
TRINITY_DN10978_c0_g1_i1.path2	3.79	5.03	4.87	12.77	10.09	16.21	73	120	96	243	242	376	2.383	1.252	3.15793e-07	6.8901e-06	up	7D	497860229	497861445	+	TRINITY_DN10978_c0_g1_i1	--	K13413 mitogen-activated protein kinase kinase 4/5 [EC:2.7.12.2] | (RefSeq) mitogen-activated protein kinase kinase 5 (A)	putative MAP kinase family protein [Zea mays]	RecName: Full=Mitogen-activated protein kinase kinase 5; Short=AtMAP2Kalpha; Short=AtMEK5; Short=AtMKK5; Short=MAP kinase kinase 5; EC=2.7.12.2;	SubName: Full=Putative MAP kinase family protein {ECO:0000313|EMBL:AQL01449.1};	Mitogen-activated protein kinase kinase (MAP2K)	GO:0005737,cytoplasm; GO:0005524,ATP binding; GO:0004674,protein serine/threonine kinase activity; GO:0032147,activation of protein kinase activity; GO:0009814,defense response, incompatible interaction; GO:0010227,floral organ abscission; GO:0010229,inflorescence development; GO:0009626,plant-type hypersensitive response; GO:0010365,positive regulation of ethylene biosynthetic process; GO:000734…	--
TRINITY_DN10978_c0_g3_i2.path2	2.2	6.43	3.61	14.93	14.72	16.27	50	181	84	335	416	445	3.167	1.663	5.51181e-09	1.71055e-07	up	6D	278821399	278822833	+	TRINITY_DN10978_c0_g3_i2	--	K13413 mitogen-activated protein kinase kinase 4/5 [EC:2.7.12.2] | (RefSeq) mitogen-activated protein kinase kinase 5-like (A)	PREDICTED: mitogen-activated protein kinase kinase 5-like [Brachypodium distachyon]	RecName: Full=Mitogen-activated protein kinase kinase 5; Short=AtMAP2Kalpha; Short=AtMEK5; Short=AtMKK5; Short=MAP kinase kinase 5; EC=2.7.12.2;	SubName: Full=Uncharacterized protein {ECO:0000313|EMBL:KQK01065.1, ECO:0000313|EnsemblPlants:BRADI3G53650.1};	Mitogen-activated protein kinase kinase (MAP2K)	GO:0005737,cytoplasm; GO:0005524,ATP binding; GO:0004674,protein serine/threonine kinase activity; GO:0032147,activation of protein kinase activity; GO:0009814,defense response, incompatible interaction; GO:0010227,floral organ abscission; GO:0010229,inflorescence development; GO:0009626,plant-type hypersensitive response; GO:0010365,positive regulation of ethylene biosynthetic process; GO:000734…	--
TRINITY_DN109782_c0_g1_i1.path2	0.18	0.14	0	3.44	0.72	6.39	1	1	0	19	5	43	26.65	4.736	0.000255069	0.0025122	up	7D	62656429	62656781	+	TRINITY_DN109782_c0_g1_i1	--	--	--	--	--	--	--	--
TRINITY_DN109784_c0_g1_i1.path1	22.9	17.33	17.58	84.84	103.01	70.96	112	105	88	410	627	418	3.791	1.922	1.45323e-15	1.26753e-13	up	7A	295383324	295383632	-	TRINITY_DN109784_c0_g1_i1	--	--	hypothetical protein TRIUR3_33319 [Triticum urartu]	--	SubName: Full=Uncharacterized protein {ECO:0000313|EnsemblPlants:TRIAE_CS42_6AL_TGACv1_471688_AA1512930.1};	--	GO:0016021,integral component of membrane	--
TRINITY_DN109784_c0_g1_i1.path2	46.41	22.28	28.57	94.16	108.43	81.49	227	135	143	455	660	480	2.461	1.299	1.11224e-06	2.15895e-05	up	7D	108195015	108195323	+	TRINITY_DN109784_c0_g1_i1	--	--	hypothetical protein TRIUR3_33319 [Triticum urartu]	--	SubName: Full=Uncharacterized protein {ECO:0000313|EnsemblPlants:TRIAE_CS42_6AL_TGACv1_471688_AA1512930.1};	--	GO:0016021,integral component of membrane	--
TRINITY_DN109785_c0_g1_i1.path1	56.65	41.88	38.94	13.64	13.39	14.92	391	358	275	93	115	124	0.256	-1.964	6.75718e-18	7.57249e-16	down	4A	357885138	357885573	-	TRINITY_DN109785_c0_g1_i1	--	--	predicted protein, partial [Hordeum vulgare subsp. vulgare]	--	SubName: Full=Uncharacterized protein {ECO:0000313|EnsemblPlants:HORVU4Hr1G089990.6};	--	--	--
TRINITY_DN109785_c0_g1_i1.path2	44.77	33.81	38.09	13.79	15.84	18.53	309	289	269	94	136	154	0.346	-1.533	1.61228e-11	7.78779e-10	down	1D	477502821	477503256	+	TRINITY_DN109785_c0_g1_i1	--	--	predicted protein, partial [Hordeum vulgare subsp. vulgare]	--	SubName: Full=Uncharacterized protein {ECO:0000313|EnsemblPlants:HORVU4Hr1G089990.6};	--	--	--
TRINITY_DN109800_c0_g1_i1.path1	1.32	3.01	3.64	6.88	10.4	10.2	6	17	17	31	59	56	2.885	1.529	0.00192376	0.0136163	up	4A	206258556	206258843	-	TRINITY_DN109800_c0_g1_i1	--	K04733 interleukin-1 receptor-associated kinase 4 [EC:2.7.11.1] | (RefSeq) LOC109739487; leucine-rich repeat receptor protein kinase MSL1-like (A)	predicted protein [Hordeum vulgare subsp. vulgare]	--	SubName: Full=Uncharacterized protein {ECO:0000313|EnsemblPlants:TRIAE_CS42_4AL_TGACv1_290631_AA0987680.1};	--	GO:0016021,integral component of membrane; GO:0005524,ATP binding; GO:0004674,protein serine/threonine kinase activity	--
TRINITY_DN109802_c0_g1_i1.path1	19.29	16.43	14.69	8.76	9.4	8.2	127	134	99	57	77	65	0.441	-1.181	2.06762e-05	0.000290137	down	3D	415801196	415801611	-	TRINITY_DN109802_c0_g1_i1	--	--	--	--	--	--	--	--
TRINITY_DN109805_c0_g1_i1.path2	1.47	1.19	1.52	0.31	0.5	0.58	19	19	20	4	8	9	0.281	-1.832	0.00452271	0.0271218	down	3A	65927795	65928608	+	TRINITY_DN109805_c0_g1_i1	--	--	--	--	--	--	--	--
TRINITY_DN109813_c0_g1_i1.path1	4.17	2.99	3.97	16.31	17.23	13.86	36	32	35	139	185	144	3.601	1.848	2.21923e-09	7.48393e-08	up	2C	299036077	299036621	-	TRINITY_DN109813_c0_g1_i1	--	--	--	--	--	--	--	--
TRINITY_DN10982_c0_g1_i11.path2	1.15	1.38	1.1	0.48	0.45	1.21	97	145	95	40	47	123	0.488	-1.035	0.00280874	0.0185139	down	7C	650641659	650647421	-	TRINITY_DN10982_c0_g1_i11	--	--	--	--	--	--	--	--
TRINITY_DN109834_c0_g1_i1.path1	7.49	3.89	8.82	5.92	2.39	1.62	73	47	88	57	29	19	0.41	-1.286	0.00619329	0.0348469	down	1D	6392135	6392750	+	TRINITY_DN109834_c0_g1_i1	--	K13496 UDP-glucosyltransferase 73C [EC:2.4.1.-] | (RefSeq) LOC109774633; UDP-glycosyltransferase 73E1-like (A)	UDP-glycosyltransferase 73E1-like [Aegilops tauschii subsp. tauschii]	RecName: Full=UDP-glycosyltransferase 73D1; EC=2.4.1.-;	RecName: Full=Glycosyltransferase {ECO:0000256|RuleBase:RU362057}; EC=2.4.1.- {ECO:0000256|RuleBase:RU362057};	UDP-glucuronosyl and UDP-glucosyl transferase	GO:0043231,intracellular membrane-bounded organelle; GO:0080043,quercetin 3-O-glucosyltransferase activity; GO:0080044,quercetin 7-O-glucosyltransferase activity; GO:0008152,metabolic process	--
TRINITY_DN109845_c0_g1_i1.path1	3.03	2.45	0.52	16.62	20.65	13.93	17	17	3	92	144	94	7.252	2.858	9.8539e-11	4.14185e-09	up	2A	311415742	311416095	-	TRINITY_DN109845_c0_g1_i1	--	--	--	--	--	--	--	--
TRINITY_DN109856_c0_g1_i1.path2	35.06	27.46	31.46	10.25	13.12	14.43	232	225	213	67	108	115	0.337	-1.568	1.21902e-10	5.03139e-09	down	4D	274960553	274960970	+	TRINITY_DN109856_c0_g1_i1	--	--	--	--	--	--	--	--
TRINITY_DN109862_c0_g1_i1.path1	18.54	13.31	16.11	3.94	9.75	11.4	81	72	72	17	53	60	0.439	-1.188	0.0018185	0.0129932	down	1A	115836595	115838318	+	TRINITY_DN109862_c0_g1_i1	--	--	--	--	--	--	--	--
TRINITY_DN109868_c0_g1_i1.path2	0.49	0.59	2.86	0.25	0.1	0.4	4	6	24	2	1	4	0.154	-2.697	0.00912717	0.0472561	down	3D	58732445	58733248	+	TRINITY_DN109868_c0_g1_i1	--	K10405 kinesin family member C1 | (RefSeq) kinesin-like calmodulin-binding protein homolog (A)	Kinesin-like calmodulin-binding protein [Triticum urartu]	RecName: Full=Kinesin-like protein KIN-14B {ECO:0000305};	SubName: Full=Kinesin-like calmodulin-binding protein {ECO:0000313|EMBL:EMS59820.1, ECO:0000313|EnsemblPlants:TRIUR3_13671-P1};	Kinesin (KAR3 subfamily)	GO:0005874,microtubule; GO:0005524,ATP binding; GO:0008017,microtubule binding; GO:0003777,microtubule motor activity; GO:0007018,microtubule-based movement	Microtubule binding
TRINITY_DN109885_c0_g1_i1.path1	3.84	6.58	4.45	2.79	1.73	3.19	32	68	38	23	18	32	0.434	-1.206	0.00466991	0.0278221	down	4D	165033050	165033576	+	TRINITY_DN109885_c0_g1_i1	--	--	--	--	--	--	--	--
TRINITY_DN109886_c0_g1_i1.path2	2.93	3.47	3.53	9.41	9.13	12.15	17	25	21	54	66	85	2.586	1.371	0.000390345	0.00362179	up	6A	212565850	212566216	-	TRINITY_DN109886_c0_g1_i1	--	--	--	--	--	--	--	--
TRINITY_DN109888_c0_g1_i1.path1	43.54	35.57	37.88	7.06	8.72	15.13	337	341	300	54	84	141	0.22	-2.184	4.95935e-17	5.09004e-15	down	3C	592746183	592746671	+	TRINITY_DN109888_c0_g1_i1	--	--	--	--	--	--	--	--
TRINITY_DN1099_c0_g1_i1.path1	0.27	0.47	0.27	0.85	1.5	1.2	15	32	15	46	102	79	2.95	1.561	0.000146286	0.00156598	up	6C	480544738	480550021	+	TRINITY_DN1099_c0_g1_i1	--	K20538 mitogen-activated protein kinase 8 [EC:2.7.11.24] | (RefSeq) mitogen-activated protein kinase 13 isoform X4 (A)	PREDICTED: mitogen-activated protein kinase 13 isoform X4 [Oryza sativa Japonica Group]	RecName: Full=Mitogen-activated protein kinase 13; Short=MAP kinase 13; EC=2.7.11.24; AltName: Full=Benzothiadiazole-induced MAP kinase 2; AltName: Full=MAP kinase 2; AltName: Full=OsBIMK2; AltName: Full=OsBWMK2; AltName: Full=OsMAPK2; AltName: Full=OsMPK17-2; AltName: Full=Wound- and blast-induced MAPK 2;	RecName: Full=Mitogen-activated protein kinase {ECO:0000256|SAAS:SAAS00652812}; EC=2.7.11.24 {ECO:0000256|SAAS:SAAS00652812};	Mitogen-activated protein kinase	GO:0005737,cytoplasm; GO:0005634,nucleus; GO:0005524,ATP binding; GO:0004707,MAP kinase activity; GO:0010468,regulation of gene expression	Protein kinase domain
TRINITY_DN10992_c0_g1_i2.path1	3.73	4.48	3.83	28.38	23.04	31.31	119	177	125	894	914	1202	5.758	2.526	2.0062e-40	1.2548e-37	up	3A	326862393	326865639	-	TRINITY_DN10992_c0_g1_i2	--	--	uncharacterized protein LOC109769107 [Aegilops tauschii subsp. tauschii]	--	SubName: Full=Uncharacterized protein {ECO:0000313|EnsemblPlants:TRIAE_CS42_3AS_TGACv1_213553_AA0707300.1};	--	GO:0016021,integral component of membrane; GO:0016787,hydrolase activity; GO:0006629,lipid metabolic process	Lipase (class 3)
TRINITY_DN10992_c0_g1_i2.path2	4.26	4.43	2.36	32.11	23.18	33.87	136	175	77	1012	920	1301	6.797	2.765	1.03924e-33	4.39599e-31	up	3D	52425588	52428803	+	TRINITY_DN10992_c0_g1_i2	--	--	uncharacterized protein LOC109769107 [Aegilops tauschii subsp. tauschii]	--	SubName: Full=Uncharacterized protein {ECO:0000313|EnsemblPlants:TRIAE_CS42_3AS_TGACv1_213553_AA0707300.1};	--	GO:0016021,integral component of membrane; GO:0016787,hydrolase activity; GO:0006629,lipid metabolic process	Lipase (class 3)
TRINITY_DN109924_c0_g1_i1.path1	0.39	0.16	0.19	4.3	2.17	2.57	2	1	1	22	14	16	10.601	3.406	0.000784172	0.00649592	up	4D	417785419	417785745	-	TRINITY_DN109924_c0_g1_i1	--	--	hypothetical protein BRADI_3g41330v3 [Brachypodium distachyon]	--	SubName: Full=Uncharacterized protein {ECO:0000313|EnsemblPlants:LPERR08G18380.1};	--	GO:0070897,transcription preinitiation complex assembly; GO:0006355,regulation of transcription, DNA-templated	--
TRINITY_DN10996_c0_g1_i1.path1	0.49	0.57	0.95	1.89	1.71	1.68	13	19	26	50	57	54	2.204	1.14	0.00864743	0.0452978	up	4A	127271986	127276294	-	TRINITY_DN10996_c0_g1_i1	--	K02540 DNA replication licensing factor MCM2 [EC:3.6.4.12] | (RefSeq) DNA replication licensing factor MCM2-like (A)	PREDICTED: uncharacterized protein LOC100827206 [Brachypodium distachyon]	--	SubName: Full=Uncharacterized protein {ECO:0000313|EnsemblPlants:BRADI4G17040.1};	Predicted membrane protein	GO:0016021,integral component of membrane; GO:0005886,plasma membrane	SNARE associated Golgi protein
TRINITY_DN1100_c1_g1_i3.path1	7.34	9.46	8.25	33.88	29.74	29.67	274	437	315	1249	1381	1333	3.141	1.651	1.15067e-20	1.66084e-18	up	7A	362047073	362050968	+	TRINITY_DN1100_c1_g1_i3	--	K23047 E3 ubiquitin-protein ligase UNKL [EC:2.3.2.27] | (RefSeq) zinc finger CCCH domain-containing protein 30-like (A)	AT-hook motif nuclear-localized protein 10-like [Aegilops tauschii subsp. tauschii]	RecName: Full=AT-hook motif nuclear-localized protein 10 {ECO:0000312|EMBL:FAA00281.1}; AltName: Full=AT-hook protein 1 {ECO:0000312|EMBL:CAA10857.1};	SubName: Full=Putative DNA-binding protein ESCAROLA {ECO:0000313|EMBL:EMT05978.1, ECO:0000313|EnsemblPlants:EMT05978};	--	GO:0005829,cytosol; GO:0005634,nucleus; GO:0003677,DNA binding; GO:0006355,regulation of transcription, DNA-templated; GO:0006351,transcription, DNA-templated	Domain of unknown function (DUF296)
TRINITY_DN1100_c1_g1_i3.path2	7.7	8.86	9.54	33.6	33.34	31.13	285	406	361	1228	1535	1387	3.161	1.66	1.43374e-20	2.04124e-18	up	7D	46260993	46264851	-	TRINITY_DN1100_c1_g1_i3	--	K23047 E3 ubiquitin-protein ligase UNKL [EC:2.3.2.27] | (RefSeq) zinc finger CCCH domain-containing protein 30-like (A)	AT-hook motif nuclear-localized protein 10-like [Aegilops tauschii subsp. tauschii]	RecName: Full=AT-hook motif nuclear-localized protein 10 {ECO:0000312|EMBL:FAA00281.1}; AltName: Full=AT-hook protein 1 {ECO:0000312|EMBL:CAA10857.1};	SubName: Full=Putative DNA-binding protein ESCAROLA {ECO:0000313|EMBL:EMT05978.1, ECO:0000313|EnsemblPlants:EMT05978};	--	GO:0005829,cytosol; GO:0005634,nucleus; GO:0003677,DNA binding; GO:0006355,regulation of transcription, DNA-templated; GO:0006351,transcription, DNA-templated	Domain of unknown function (DUF296)
TRINITY_DN1100_c1_g1_i3.path3	4.2	5.58	5.05	16.22	14.85	14.2	156	257	192	596	687	636	2.574	1.364	3.62652e-12	1.93995e-10	up	5C	12680084	12683968	-	TRINITY_DN1100_c1_g1_i3	--	K23047 E3 ubiquitin-protein ligase UNKL [EC:2.3.2.27] | (RefSeq) zinc finger CCCH domain-containing protein 30-like (A)	AT-hook motif nuclear-localized protein 10-like [Aegilops tauschii subsp. tauschii]	RecName: Full=AT-hook motif nuclear-localized protein 10 {ECO:0000312|EMBL:FAA00281.1}; AltName: Full=AT-hook protein 1 {ECO:0000312|EMBL:CAA10857.1};	SubName: Full=Putative DNA-binding protein ESCAROLA {ECO:0000313|EMBL:EMT05978.1, ECO:0000313|EnsemblPlants:EMT05978};	--	GO:0005829,cytosol; GO:0005634,nucleus; GO:0003677,DNA binding; GO:0006355,regulation of transcription, DNA-templated; GO:0006351,transcription, DNA-templated	Domain of unknown function (DUF296)
TRINITY_DN11000_c0_g1_i2.path1	0.21	1.06	0.94	44.98	21.9	26.73	6	38	28	1288	790	933	35.8	5.162	1.4005e-14	1.07654e-12	up	1D	318846031	318849924	+	TRINITY_DN11000_c0_g1_i2	--	K00827 alanine-glyoxylate transaminase / (R)-3-amino-2-methylpropionate-pyruvate transaminase [EC:2.6.1.44 2.6.1.40] | (RefSeq) LOC109784440; alanine--glyoxylate aminotransferase 2 homolog 3, mitochondrial-like (A)	predicted protein [Hordeum vulgare subsp. vulgare]	RecName: Full=Alanine--glyoxylate aminotransferase 2 homolog 3, mitochondrial; EC=2.6.1.44; AltName: Full=Beta-alanine-pyruvate aminotransferase 3; Flags: Precursor;	SubName: Full=Predicted protein {ECO:0000313|EMBL:BAJ89324.1};	Alanine-glyoxylate aminotransferase AGT2	GO:0005739,mitochondrion; GO:0008453,alanine-glyoxylate transaminase activity; GO:0042802,identical protein binding; GO:0030170,pyridoxal phosphate binding; GO:0043562,cellular response to nitrogen levels; GO:0009853,photorespiration	Aminotransferase class-III
TRINITY_DN11000_c0_g1_i2.path2	0.24	0.47	0.37	32.51	13.26	28.41	7	17	11	936	481	997	57.006	5.833	1.05922e-55	1.68506e-52	up	1A	324325763	324329666	+	TRINITY_DN11000_c0_g1_i2	--	--	--	--	--	--	--	--
TRINITY_DN110037_c0_g1_i1.path1	13.78	8.86	10.96	6.74	3.19	4.36	118	94	96	57	34	45	0.355	-1.496	1.57714e-05	0.000228	down	7A	146057270	146057810	+	TRINITY_DN110037_c0_g1_i1	--	--	--	--	--	--	--	--
TRINITY_DN11005_c1_g1_i2.path1	0	0.8	0	16.49	3.67	12.54	0	5	0	82	23	76	33.675	5.074	0.000268373	0.00261927	up	7A	427767619	427767936	-	TRINITY_DN11005_c1_g1_i2	--	K00128 aldehyde dehydrogenase (NAD+) [EC:1.2.1.3] | (RefSeq) aldehyde dehydrogenase family 2 member B7, mitochondrial-like (A)	mitochondrial aldehyde dehydrogenase precursor, partial [Oryza sativa Indica Group]	RecName: Full=Aldehyde dehydrogenase family 2 member B7, mitochondrial; Short=ALDH2b; EC=1.2.1.3; Flags: Precursor;	SubName: Full=Uncharacterized protein {ECO:0000313|EMBL:JAF51991.1};	Aldehyde dehydrogenase	GO:0005759,mitochondrial matrix; GO:0004029,aldehyde dehydrogenase (NAD) activity	--
TRINITY_DN110132_c0_g1_i1.path1	7.05	4.83	4.95	0.93	1.36	1.4	46	39	33	6	11	11	0.185	-2.432	1.92417e-06	3.51719e-05	down	6C	7161514	7161925	-	TRINITY_DN110132_c0_g1_i1	--	--	--	--	--	--	--	--
TRINITY_DN110188_c0_g1_i1.path1	0.56	1.46	3.68	0.42	0.45	0.12	4	13	27	3	4	1	0.144	-2.798	0.0029439	0.0192608	down	7A	307106637	307107089	+	TRINITY_DN110188_c0_g1_i1	--	--	--	--	--	--	--	--
TRINITY_DN11031_c0_g1_i4.path1	4.92	5.82	7.79	4.38	3.68	2.82	58	85	94	51	54	40	0.492	-1.022	0.00311676	0.0201201	down	6D	242073749	242076304	+	TRINITY_DN11031_c0_g1_i4	--	K09872 aquaporin PIP | (RefSeq) LOC109745522; probable aquaporin PIP2-2 (A)	HvPIP2;1 [Hordeum vulgare subsp. vulgare]	RecName: Full=Probable aquaporin PIP2-2; AltName: Full=OsPIP2;2; AltName: Full=Plasma membrane intrinsic protein 2-2;	SubName: Full=Uncharacterized protein {ECO:0000313|EnsemblPlants:HORVU6Hr1G058930.12};	Aquaporin (major intrinsic protein family)	GO:0005887,integral component of plasma membrane; GO:0015250,water channel activity; GO:0034220,ion transmembrane transport	Major intrinsic protein
TRINITY_DN11031_c0_g1_i4.path2	59.53	45.05	68.04	23.43	18.94	16.27	702	658	821	273	278	231	0.284	-1.814	6.87454e-15	5.53435e-13	down	6A	278689261	278691804	-	TRINITY_DN11031_c0_g1_i4	--	K09872 aquaporin PIP | (RefSeq) LOC109745522; probable aquaporin PIP2-2 (A)	HvPIP2;1 [Hordeum vulgare subsp. vulgare]	RecName: Full=Probable aquaporin PIP2-2; AltName: Full=OsPIP2;2; AltName: Full=Plasma membrane intrinsic protein 2-2;	SubName: Full=Uncharacterized protein {ECO:0000313|EnsemblPlants:HORVU6Hr1G058930.12};	Aquaporin (major intrinsic protein family)	GO:0005887,integral component of plasma membrane; GO:0015250,water channel activity; GO:0034220,ion transmembrane transport	Major intrinsic protein
TRINITY_DN110325_c0_g1_i1.path1	0.72	1.35	1.17	5.81	2.88	7.35	3	7	5	24	15	37	4.099	2.035	0.00339774	0.0215743	up	1A	469692459	469692722	-	TRINITY_DN110325_c0_g1_i1	--	--	--	--	--	--	--	--
TRINITY_DN110344_c0_g1_i1.path1	8.78	7.37	5.05	3.48	4.84	3.43	51	53	30	20	35	24	0.471	-1.086	0.00956514	0.0489899	down	5C	593967571	593967937	-	TRINITY_DN110344_c0_g1_i1	--	--	--	--	--	--	--	--
TRINITY_DN11036_c1_g1_i1.path1	2.33	2.35	3.22	0.59	0	1.29	12	15	17	3	0	8	0.194	-2.364	0.00646533	0.0360945	down	2C	372840322	372840820	+	TRINITY_DN11036_c1_g1_i1	--	--	--	--	--	--	--	--
TRINITY_DN110372_c0_g1_i1.path1	2.47	2.66	3.42	0.83	0.83	0.51	12	16	17	4	5	3	0.213	-2.231	0.00380168	0.0235786	down	5A	470620034	470645819	-	TRINITY_DN110372_c0_g1_i1	--	--	--	--	--	--	--	--
TRINITY_DN11041_c0_g4_i2.path2	26.01	22.96	24.16	9.98	14.28	12.08	161	176	153	61	110	90	0.419	-1.255	1.09827e-06	2.13468e-05	down	5C	535388855	535389245	+	TRINITY_DN11041_c0_g4_i2	--	--	--	--	--	--	--	--
TRINITY_DN110416_c0_g1_i1.path1	4.87	4.17	6.06	1.94	1.54	2.21	33	35	42	13	13	18	0.314	-1.671	0.000441633	0.00401918	down	5C	123385091	123385518	-	TRINITY_DN110416_c0_g1_i1	--	K00850 6-phosphofructokinase 1 [EC:2.7.1.11] | (RefSeq) ATP-dependent 6-phosphofructokinase 5, chloroplastic (A)	ATP-dependent 6-phosphofructokinase 5 chloroplastic [Zea mays]	RecName: Full=ATP-dependent 6-phosphofructokinase 5, chloroplastic {ECO:0000255|HAMAP-Rule:MF_03186}; Short=ATP-PFK 5 {ECO:0000255|HAMAP-Rule:MF_03186}; Short=Phosphofructokinase 5 {ECO:0000255|HAMAP-Rule:MF_03186}; EC=2.7.1.11 {ECO:0000255|HAMAP-Rule:MF_03186}; AltName: Full=Phosphohexokinase 5 {ECO:0000255|HAMAP-Rule:MF_03186}; Flags: Precursor;	SubName: Full=Uncharacterized protein {ECO:0000313|EnsemblPlants:HORVU7Hr1G019810.4};	Pyrophosphate-dependent phosphofructo-1-kinase	GO:0009507,chloroplast; GO:0003872,6-phosphofructokinase activity; GO:0005524,ATP binding; GO:0046872,metal ion binding; GO:0006002,fructose 6-phosphate metabolic process; GO:0006096,glycolytic process	--
TRINITY_DN110431_c0_g1_i1.path1	38.11	35.2	25.26	13.21	22.66	10.62	146	167	99	50	108	49	0.403	-1.313	5.17707e-05	0.000641906	down	5C	569959054	569959295	+	TRINITY_DN110431_c0_g1_i1	--	--	--	--	--	--	--	--
TRINITY_DN110434_c0_g1_i1.path1	2.08	2.98	2.66	31.32	23.32	18.24	13	23	17	193	181	137	7.961	2.993	8.58205e-17	8.57959e-15	up	5C	455758639	455759032	+	TRINITY_DN110434_c0_g1_i1	--	--	--	--	SubName: Full=Uncharacterized protein {ECO:0000313|EnsemblPlants:TRIAE_CS42_5BL_TGACv1_404685_AA1308370.1};	--	GO:0016021,integral component of membrane; GO:0005886,plasma membrane; GO:0022857,transmembrane transporter activity	--
TRINITY_DN11044_c0_g1_i2.path1	3.51	4.53	2.92	11.01	11.42	21.57	20	32	17	62	81	148	3.343	1.741	6.46682e-06	0.000103462	up	3A	406689246	406689605	+	TRINITY_DN11044_c0_g1_i2	--	--	predicted protein [Hordeum vulgare subsp. vulgare]	--	SubName: Full=Predicted protein {ECO:0000313|EMBL:BAJ98157.1};	--	--	--
TRINITY_DN110491_c0_g1_i1.path1	3.64	8.63	5.7	2.58	3.12	4.14	30	88	48	21	32	41	0.461	-1.117	0.00648275	0.0361586	down	3C	137697699	137698218	+	TRINITY_DN110491_c0_g1_i1	--	--	uncharacterized protein LOC109771800 [Aegilops tauschii subsp. tauschii]	--	SubName: Full=Uncharacterized protein {ECO:0000313|EnsemblPlants:TRIAE_CS42_7DS_TGACv1_622912_AA2047140.1};	--	GO:0000145,exocyst; GO:0003676,nucleic acid binding; GO:0008270,zinc ion binding; GO:0006887,exocytosis	--
TRINITY_DN1105_c0_g1_i2.path1	0.56	0.56	2.01	0.23	0.07	0.15	25	31	92	10	4	8	0.115	-3.114	5.22362e-07	1.08875e-05	down	3A	52539671	52546269	+	TRINITY_DN1105_c0_g1_i2	--	K08245 phytepsin [EC:3.4.23.40] | (RefSeq) LOC109742347; aspartic proteinase oryzasin-1-like isoform X1 (A)	aspartic proteinase oryzasin-1-like isoform X1 [Aegilops tauschii subsp. tauschii]	RecName: Full=Aspartic proteinase oryzasin-1; EC=3.4.23.-; Flags: Precursor;	SubName: Full=Uncharacterized protein {ECO:0000313|EnsemblPlants:TRIAE_CS42_6AL_TGACv1_472973_AA1527720.1};	Aspartyl protease	GO:0005773,vacuole; GO:0004190,aspartic-type endopeptidase activity; GO:0006629,lipid metabolic process; GO:0030163,protein catabolic process; GO:0006508,proteolysis	Eukaryotic aspartyl protease
TRINITY_DN110536_c0_g1_i1.path1	2.78	2.33	2.4	0.55	1.27	2.04	51	53	45	10	29	45	0.43	-1.216	0.00571938	0.0326881	down	7A	268900162	268901320	+	TRINITY_DN110536_c0_g1_i1	--	--	--	--	--	--	--	--
TRINITY_DN110538_c0_g1_i1.path1	0.54	1.88	1.22	10.87	5.75	9.51	3	13	7	60	40	64	5.941	2.571	1.90704e-06	3.49133e-05	up	1C	153609566	153610677	-	TRINITY_DN110538_c0_g1_i1	--	--	--	--	--	--	--	--
TRINITY_DN110566_c0_g1_i1.path1	13.69	14.66	10.8	28.24	26.65	43.5	52	69	42	106	126	199	2.102	1.072	0.000267912	0.00261582	up	1C	2927009	2927248	-	TRINITY_DN110566_c0_g1_i1	--	--	--	--	--	--	--	--
TRINITY_DN11060_c0_g1_i3.path1	4.63	5.19	5.85	3.54	2.67	3.05	106	147	137	80	76	84	0.494	-1.016	0.000174149	0.00181359	down	5C	572373884	572384271	-	TRINITY_DN11060_c0_g1_i3	--	K14432 ABA responsive element binding factor | (RefSeq) ABSCISIC ACID-INSENSITIVE 5-like protein 5 (A)	PREDICTED: ABSCISIC ACID-INSENSITIVE 5-like protein 5 [Brachypodium distachyon]	RecName: Full=bZIP transcription factor 46 {ECO:0000305}; Short=OsBZIP46 {ECO:0000303|PubMed:18065552}; AltName: Full=AREB/ABF-family transcription factor 8 {ECO:0000303|PubMed:19947981}; Short=OsAREB8 {ECO:0000303|PubMed:19947981}; AltName: Full=Abscisic acid responsive elements-binding factor 2 {ECO:0000303|PubMed:20576316}; Short=ABRE-binding factor 2 {ECO:0000303|PubMed:20576316}; Short=OsABF…	SubName: Full=Uncharacterized protein {ECO:0000313|EMBL:KQK19036.1, ECO:0000313|EnsemblPlants:BRADI1G46060.1};	--	GO:0005634,nucleus; GO:0003677,DNA binding; GO:0003700,DNA-binding transcription factor activity; GO:0009738,abscisic acid-activated signaling pathway; GO:0006351,transcription, DNA-templated	bZIP transcription factor
TRINITY_DN110699_c0_g1_i1.path1	16.67	12.3	11.97	6.33	8.06	6.81	128	117	94	48	77	63	0.437	-1.194	4.62035e-05	0.00058195	down	2C	39789414	39789898	-	TRINITY_DN110699_c0_g1_i1	--	--	--	--	--	--	--	--
TRINITY_DN110718_c0_g1_i1.path1	1.2	1.21	0.59	7.92	4.83	7.24	4	5	2	26	20	29	5.569	2.478	0.000624828	0.00536859	up	4D	231175901	231176110	-	TRINITY_DN110718_c0_g1_i1	--	--	--	--	--	--	--	--
TRINITY_DN11074_c1_g1_i1.path1	882.42	865.05	1296.69	552.24	625.86	571.35	13102	15908	19700	8101	11564	10216	0.48	-1.06	1.11061e-07	2.6602e-06	down	6A	344864154	344865174	+	TRINITY_DN11074_c1_g1_i1	--	K08914 light-harvesting complex II chlorophyll a/b binding protein 3 | (RefSeq) LOC109764234; chlorophyll a-b binding protein of LHCII type III, chloroplastic (A)	hypothetical protein [Klebsiella pneumoniae]	RecName: Full=Chlorophyll a-b binding protein of LHCII type III, chloroplastic; Short=CAB; Flags: Precursor;	RecName: Full=Chlorophyll a-b binding protein, chloroplastic {ECO:0000256|RuleBase:RU363080};	--	GO:0009535,chloroplast thylakoid membrane; GO:0016021,integral component of membrane; GO:0009522,photosystem I; GO:0009523,photosystem II; GO:0016168,chlorophyll binding; GO:0046872,metal ion binding; GO:0009765,photosynthesis, light harvesting; GO:0018298,protein-chromophore linkage	Chlorophyll A-B binding protein
TRINITY_DN11074_c1_g1_i1.path2	1718.87	1708.12	2392.56	865.25	972.87	1053.79	25086	30876	35729	12476	17669	18521	0.414	-1.273	8.77994e-12	4.43108e-10	down	2D	308988913	308989928	+	TRINITY_DN11074_c1_g1_i1	--	K08914 light-harvesting complex II chlorophyll a/b binding protein 3 | (RefSeq) LOC109764234; chlorophyll a-b binding protein of LHCII type III, chloroplastic (A)	hypothetical protein [Klebsiella pneumoniae]	RecName: Full=Chlorophyll a-b binding protein of LHCII type III, chloroplastic; Short=CAB; Flags: Precursor;	RecName: Full=Chlorophyll a-b binding protein, chloroplastic {ECO:0000256|RuleBase:RU363080};	--	GO:0009535,chloroplast thylakoid membrane; GO:0016021,integral component of membrane; GO:0009522,photosystem I; GO:0009523,photosystem II; GO:0016168,chlorophyll binding; GO:0046872,metal ion binding; GO:0009765,photosynthesis, light harvesting; GO:0018298,protein-chromophore linkage	Chlorophyll A-B binding protein
TRINITY_DN110747_c0_g1_i1.path1	271.42	195.9	196.66	98.05	92.13	89.18	1160	1037	860	414	490	459	0.354	-1.499	1.1523e-14	9.00897e-13	down	3C	624819213	624819482	+	TRINITY_DN110747_c0_g1_i1	--	K08967 1,2-dihydroxy-3-keto-5-methylthiopentene dioxygenase [EC:1.13.11.53 1.13.11.54] | (RefSeq) 1,2-dihydroxy-3-keto-5-methylthiopentene dioxygenase 1-like (A)	1,2-dihydroxy-3-keto-5-methylthiopentene dioxygenase 1-like [Dendrobium catenatum]	RecName: Full=1,2-dihydroxy-3-keto-5-methylthiopentene dioxygenase 4 {ECO:0000255|HAMAP-Rule:MF_03154}; EC=1.13.11.54 {ECO:0000255|HAMAP-Rule:MF_03154}; AltName: Full=Acireductone dioxygenase (Fe(2+)-requiring) 4 {ECO:0000255|HAMAP-Rule:MF_03154}; Short=ARD 4 {ECO:0000255|HAMAP-Rule:MF_03154}; Short=Fe-ARD 4 {ECO:0000255|HAMAP-Rule:MF_03154};	RecName: Full=1,2-dihydroxy-3-keto-5-methylthiopentene dioxygenase {ECO:0000256|HAMAP-Rule:MF_03154}; EC=1.13.11.54 {ECO:0000256|HAMAP-Rule:MF_03154}; AltName: Full=Acireductone dioxygenase (Fe(2+)-requiring) {ECO:0000256|HAMAP-Rule:MF_03154}; Short=ARD {ECO:0000256|HAMAP-Rule:MF_03154}; Short=Fe-ARD {ECO:0000256|HAMAP-Rule:MF_03154};	--	GO:0005737,cytoplasm; GO:0005634,nucleus; GO:0010309,acireductone dioxygenase [iron(II)-requiring] activity; GO:0046872,metal ion binding; GO:0019509,L-methionine salvage from methylthioadenosine; GO:0006555,methionine metabolic process	--
TRINITY_DN11075_c0_g1_i6.path1	0.48	0.71	0.43	1.75	1.95	1.25	13	24	12	47	66	41	2.584	1.369	0.00259404	0.0173725	up	7D	362899529	362901275	+	TRINITY_DN11075_c0_g1_i6	--	--	--	--	--	--	--	--
TRINITY_DN11076_c0_g1_i1.path1	3.23	2.21	2.67	9.06	11.39	5.16	13	11	11	36	57	25	2.691	1.428	0.00731066	0.0397464	up	4A	278149936	278150189	-	TRINITY_DN11076_c0_g1_i1	--	--	--	--	--	--	--	--
TRINITY_DN110779_c0_g1_i1.path1	0.47	0.94	0	55.21	27.54	43.36	2	5	0	234	147	224	71.809	6.166	2.4311e-22	3.97998e-20	up	7A	298906692	298906962	-	TRINITY_DN110779_c0_g1_i1	--	--	--	--	--	--	--	--
TRINITY_DN110780_c0_g1_i1.path2	21.75	25.78	24.2	8.67	10.41	15.18	94	138	107	37	56	79	0.4	-1.321	7.60249e-06	0.000119541	down	6A	95056395	95056667	-	TRINITY_DN110780_c0_g1_i1	--	--	--	--	--	--	--	--
TRINITY_DN110782_c0_g1_i1.path1	9.12	8.08	9.57	28.59	24.49	14.96	41	45	44	127	137	81	2.153	1.106	0.0012796	0.00972276	up	2D	356515327	356515610	-	TRINITY_DN110782_c0_g1_i1	--	--	--	--	--	--	--	--
TRINITY_DN110793_c0_g1_i1.path1	8.18	8.07	3.55	14.49	15.52	17.36	36	44	16	63	85	92	2.019	1.014	0.00617572	0.0347588	up	4C	118945786	118946063	-	TRINITY_DN110793_c0_g1_i1	--	--	--	--	--	--	--	--
TRINITY_DN110818_c0_g1_i1.path1	3.84	5.43	5.16	1.22	0.97	2.59	16	28	22	5	5	13	0.276	-1.859	0.00327435	0.0209343	down	1C	428106839	428107101	+	TRINITY_DN110818_c0_g1_i1	--	--	--	--	--	--	--	--
TRINITY_DN110818_c0_g1_i1.path4	3.62	5.06	4.01	1.71	0.78	2	15	26	17	7	4	10	0.294	-1.767	0.00708841	0.0387922	down	3A	412113561	412113822	+	TRINITY_DN110818_c0_g1_i1	--	--	--	--	--	--	--	--
TRINITY_DN11082_c0_g1_i5.path1	0.07	0.36	0.4	2.1	0.74	0.92	2	12	11	56	25	30	3.788	1.922	0.00243695	0.0164971	up	5C	378561240	378564037	+	TRINITY_DN11082_c0_g1_i5	--	K17505 protein phosphatase 1K [EC:3.1.3.16] | (RefSeq) probable protein phosphatase 2C 73 (A)	probable protein phosphatase 2C 73 [Aegilops tauschii subsp. tauschii]	RecName: Full=Probable protein phosphatase 2C 73; Short=OsPP2C73; EC=3.1.3.16;	SubName: Full=Uncharacterized protein {ECO:0000313|EnsemblPlants:TRIAE_CS42_5DL_TGACv1_438449_AA1468330.1};	Serine/threonine protein phosphatase	GO:0046872,metal ion binding; GO:0004722,protein serine/threonine phosphatase activity	Protein phosphatase 2C
TRINITY_DN11083_c0_g1_i15.path1	0.58	0.83	0.68	0.12	0.32	0.54	34	60	41	7	23	38	0.391	-1.354	0.00449688	0.0269912	down	3C	70779147	70784457	+	TRINITY_DN11083_c0_g1_i15	--	K21867 potassium channel | (RefSeq) LOC109787217; potassium channel KAT2-like isoform X1 (A)	potassium channel KAT2-like isoform X2 [Aegilops tauschii subsp. tauschii]	RecName: Full=Potassium channel KAT2;	SubName: Full=Uncharacterized protein {ECO:0000313|EnsemblPlants:TRIAE_CS42_3DS_TGACv1_271509_AA0900720.1};	K+-channel ERG and related proteins, contain PAS/PAC sensor domain	GO:0005887,integral component of plasma membrane; GO:0005249,voltage-gated potassium channel activity; GO:0034765,regulation of ion transmembrane transport; GO:0042391,regulation of membrane potential	KHA, dimerisation domain of potassium ion channel
TRINITY_DN11083_c0_g1_i15.path2	1.22	1.4	1.28	0.38	0.99	0.91	71	101	76	22	72	64	0.496	-1.011	0.0043887	0.0264678	down	3A	359223796	359228879	-	TRINITY_DN11083_c0_g1_i15	--	K21867 potassium channel | (RefSeq) LOC109787217; potassium channel KAT2-like isoform X1 (A)	potassium channel KAT2-like isoform X2 [Aegilops tauschii subsp. tauschii]	RecName: Full=Potassium channel KAT2;	SubName: Full=Uncharacterized protein {ECO:0000313|EnsemblPlants:TRIAE_CS42_3B_TGACv1_223474_AA0782740.1};	K+-channel ERG and related proteins, contain PAS/PAC sensor domain	GO:0005887,integral component of plasma membrane; GO:0005249,voltage-gated potassium channel activity; GO:0034765,regulation of ion transmembrane transport; GO:0042391,regulation of membrane potential	KHA, dimerisation domain of potassium ion channel
TRINITY_DN110856_c0_g1_i1.path1	1.15	0.5	1.12	5.45	4.11	4.98	13	7	13	61	58	68	4.445	2.152	4.52722e-06	7.52644e-05	up	4D	45411767	45412482	-	TRINITY_DN110856_c0_g1_i1	--	--	--	--	--	--	--	--
TRINITY_DN110874_c0_g1_i1.path2	5.76	18.8	15.57	28.18	31.08	51.9	43	174	119	208	289	467	2.31	1.208	0.000273147	0.00265804	up	5A	461572099	461572570	+	TRINITY_DN110874_c0_g1_i1	--	--	--	--	--	--	--	--
TRINITY_DN11089_c0_g2_i1.path1	23.6	22.07	18.76	11.79	9.72	13.83	316	366	257	156	162	223	0.46	-1.121	9.57738e-08	2.32768e-06	down	7A	197847927	197848896	-	TRINITY_DN11089_c0_g2_i1	--	--	--	--	--	--	--	--
TRINITY_DN110923_c0_g1_i1.path2	4.77	4.16	4.54	1.44	1.55	3.1	37	40	36	11	15	29	0.378	-1.404	0.00261329	0.0174742	down	2D	221077886	221078375	+	TRINITY_DN110923_c0_g1_i1	--	--	--	--	--	--	--	--
TRINITY_DN11097_c1_g1_i6.path2	3.22	4.76	5.92	1.05	1.32	4.53	59	108	111	19	30	100	0.407	-1.298	0.0032146	0.0206352	down	5A	34827476	34828633	+	TRINITY_DN11097_c1_g1_i6	--	K00558 DNA (cytosine-5)-methyltransferase 1 [EC:2.1.1.37] | (RefSeq) LOC109780257; DNA (cytosine-5)-methyltransferase CMT2-like (A)	DNA (cytosine-5)-methyltransferase CMT2-like [Aegilops tauschii subsp. tauschii]	RecName: Full=DNA (cytosine-5)-methyltransferase CMT2 {ECO:0000305}; EC=2.1.1.37 {ECO:0000305}; AltName: Full=Chromomethylase 2 {ECO:0000305}; AltName: Full=OsCMT2 {ECO:0000303|PubMed:19788421};	SubName: Full=Uncharacterized protein {ECO:0000313|EnsemblPlants:HORVU4Hr1G058250.9};	--	GO:0005634,nucleus; GO:0003682,chromatin binding; GO:0003886,DNA (cytosine-5-)-methyltransferase activity; GO:0003677,DNA binding	--
TRINITY_DN110997_c0_g1_i1.path1	23.51	16.24	39.87	19.79	14.11	13.41	83	71	144	69	62	57	0.494	-1.018	0.00556973	0.0319933	down	3C	616779973	616780195	-	TRINITY_DN110997_c0_g1_i1	--	--	--	--	--	--	--	--
TRINITY_DN11100_c1_g1_i2.path1	4.91	4.03	9.28	55.21	36.26	42.53	62	63	120	689	570	647	6.133	2.617	4.42747e-19	5.57656e-17	up	2D	62877897	62878694	+	TRINITY_DN11100_c1_g1_i2	--	--	PREDICTED: uncharacterized protein LOC4334202 [Oryza sativa Japonica Group]	--	SubName: Full=Uncharacterized protein {ECO:0000313|EnsemblPlants:OPUNC07G01050.1};	--	--	--
TRINITY_DN111012_c0_g1_i1.path1	6.71	7.47	8.35	4.84	3.68	4.48	66	91	84	47	45	53	0.482	-1.052	0.000904623	0.00731992	down	3D	373907079	373907699	+	TRINITY_DN111012_c0_g1_i1	--	K13029 4-hydroxyphenylacetaldehyde oxime monooxygenase [EC:1.14.14.37] | (RefSeq) 4-hydroxyphenylacetaldehyde oxime monooxygenase-like (A)	4-hydroxyphenylacetaldehyde oxime monooxygenase [Triticum urartu]	RecName: Full=4-hydroxyphenylacetaldehyde oxime monooxygenase; EC=1.14.14.37 {ECO:0000269|PubMed:26361733}; AltName: Full=Cytochrome P450 71E1;	SubName: Full=4-hydroxyphenylacetaldehyde oxime monooxygenase {ECO:0000313|EMBL:EMS54445.1, ECO:0000313|EnsemblPlants:TRIUR3_02161-P1};	Cytochrome P450 CYP2 subfamily	GO:0005789,endoplasmic reticulum membrane; GO:0016021,integral component of membrane; GO:0020037,heme binding; GO:0005506,iron ion binding; GO:0004497,monooxygenase activity; GO:0016705,oxidoreductase activity, acting on paired donors, with incorporation or reduction of molecular oxygen; GO:0010132,dhurrin biosynthetic process	Cytochrome P450
TRINITY_DN111050_c0_g1_i1.path1	11.74	8.84	8.22	3.96	4.09	3.57	60	56	43	20	26	22	0.34	-1.556	9.63238e-05	0.00109404	down	6D	178216489	178218204	-	TRINITY_DN111050_c0_g1_i1	--	--	--	--	--	--	--	--
TRINITY_DN111058_c0_g1_i1.path1	6.33	7.93	7.43	2.72	4.33	4.6	40	62	48	17	34	35	0.453	-1.143	0.0036012	0.0226169	down	6A	211802999	211803397	+	TRINITY_DN111058_c0_g1_i1	--	--	--	--	--	--	--	--
TRINITY_DN111061_c0_g1_i1.path2	0.18	0.45	0.18	1.68	1.48	1.61	2	6	2	18	20	21	4.881	2.287	0.00370114	0.0231176	up	7A	473363817	473364500	+	TRINITY_DN111061_c0_g1_i1	--	K13466 EIX receptor 1/2 | (RefSeq) Eix2; EIX receptor 2 (A)	probable leucine-rich repeat receptor-like protein kinase At1g35710 [Aegilops tauschii subsp. tauschii]	RecName: Full=Receptor-like protein EIX2 {ECO:0000305}; AltName: Full=EIX receptor 2 {ECO:0000312|EMBL:AAR28378.1}; Flags: Precursor;	SubName: Full=Uncharacterized protein {ECO:0000313|EnsemblPlants:TRIAE_CS42_1BS_TGACv1_052012_AA0181220.1};	FOG: Leucine rich repeat	GO:0016021,integral component of membrane; GO:0005886,plasma membrane; GO:0050832,defense response to fungus	Leucine rich repeat
TRINITY_DN111099_c0_g1_i1.path1	9.78	7.67	10.38	2.83	3.14	3.25	35	34	38	10	14	14	0.278	-1.847	0.000151076	0.00160704	down	6A	1525626	1530116	-	TRINITY_DN111099_c0_g1_i1	--	--	--	--	--	--	--	--
TRINITY_DN1111_c0_g1_i1.path3	305.56	293.8	283.51	174.23	193.93	150.47	4919	5858	4670	2771	3885	2917	0.496	-1.012	2.38117e-09	7.96396e-08	down	5C	323127509	323128638	-	TRINITY_DN1111_c0_g1_i1	--	K10355 actin, other eukaryote | (RefSeq) LOC109757709; actin-3-like (A)	actin, partial [Poa pratensis]	RecName: Full=Actin-3;	SubName: Full=Actin {ECO:0000313|EMBL:AQU42548.1}; Flags: Fragment;	Actin and related proteins	GO:0005737,cytoplasm; GO:0005856,cytoskeleton; GO:0005524,ATP binding	Actin
TRINITY_DN1111_c0_g3_i1.path1	5.41	6.23	4.99	17.5	12.39	15.23	139	198	131	444	396	471	2.285	1.192	2.12676e-08	5.84211e-07	up	1D	328392641	328396470	+	TRINITY_DN1111_c0_g3_i1	--	K10355 actin, other eukaryote | (RefSeq) LOC109744217; actin-7 (A)	actin-7 [Aegilops tauschii subsp. tauschii]	RecName: Full=Actin-7;	SubName: Full=Actin-7 {ECO:0000313|EMBL:EMT13696.1, ECO:0000313|EnsemblPlants:EMT13696};	Actin and related proteins	GO:0005737,cytoplasm; GO:0005856,cytoskeleton; GO:0005524,ATP binding	Actin
TRINITY_DN11113_c0_g1_i4.path1	0.19	0.14	0.31	0.92	0.47	1.12	11	10	18	52	33	77	3.243	1.697	0.000707638	0.00596181	up	7D	455031064	455038776	-	TRINITY_DN11113_c0_g1_i4	--	K04733 interleukin-1 receptor-associated kinase 4 [EC:2.7.11.1] | (RefSeq) protein STRUBBELIG-RECEPTOR FAMILY 3-like (A)	PREDICTED: protein STRUBBELIG-RECEPTOR FAMILY 3-like [Brachypodium distachyon]	RecName: Full=Protein STRUBBELIG-RECEPTOR FAMILY 3; AltName: Full=Leucine-rich repeat receptor kinase-like protein SRF3; Flags: Precursor;	SubName: Full=Uncharacterized protein {ECO:0000313|EnsemblPlants:BRADI1G31600.2};	--	GO:0016021,integral component of membrane; GO:0005886,plasma membrane; GO:0005524,ATP binding; GO:0004675,transmembrane receptor protein serine/threonine kinase activity; GO:0007166,cell surface receptor signaling pathway; GO:0007623,circadian rhythm; GO:0006468,protein phosphorylation	Protein tyrosine kinase
TRINITY_DN11113_c1_g1_i1.path1	9.41	7.77	16.76	40.86	13.45	32.31	45	46	82	193	80	186	2.112	1.079	0.0060242	0.0340816	up	1A	8706884	8707257	+	TRINITY_DN11113_c1_g1_i1	--	--	--	--	--	--	--	--
TRINITY_DN111151_c0_g1_i1.path1	2.41	3.89	3.18	9.18	9.33	8.7	17	34	23	64	82	74	2.413	1.271	0.000662864	0.0056365	up	6C	35155443	35155888	-	TRINITY_DN111151_c0_g1_i1	--	K18998 RNA polymerase II C-terminal domain phosphatase-like 1/2 [EC:3.1.3.16] | (RefSeq) LOC109758503; RNA polymerase II C-terminal domain phosphatase-like 1 (A)	RNA polymerase II C-terminal domain phosphatase-like 1 [Triticum urartu]	--	SubName: Full=Uncharacterized protein {ECO:0000313|EnsemblPlants:TRIAE_CS42_6AL_TGACv1_471897_AA1515740.3};	--	GO:0003723,RNA binding	--
TRINITY_DN111171_c0_g1_i1.path2	0	0.17	1.01	1.36	1.82	3.51	0	2	10	13	22	41	4.681	2.227	0.00813046	0.0431718	up	4C	98442485	98443097	-	TRINITY_DN111171_c0_g1_i1	--	--	hypothetical protein BRADI_2g11855v3 [Brachypodium distachyon]	--	SubName: Full=Uncharacterized protein {ECO:0000313|EnsemblPlants:TRIAE_CS42_3DL_TGACv1_250299_AA0865630.1};	--	--	--
TRINITY_DN111181_c0_g1_i1.path1	62.1	96.79	112.52	12.44	7.8	22.56	288	556	534	57	45	126	0.13	-2.941	1.22712e-21	1.90657e-19	down	6C	537283887	537284179	-	TRINITY_DN111181_c0_g1_i1	--	--	--	--	--	--	--	--
TRINITY_DN11119_c0_g1_i9.path1	4.2	4.01	4.2	2.43	2.57	2.02	126	149	129	72	96	73	0.477	-1.069	5.75345e-05	0.000702304	down	3C	297832147	297846560	-	TRINITY_DN11119_c0_g1_i9	--	--	--	--	--	--	--	--
TRINITY_DN11121_c1_g2_i2.path1	0	0.91	0.79	3.59	2.65	3.36	0	18	13	57	53	65	4.704	2.234	8.86907e-05	0.00101937	up	6A	70480743	70481756	+	TRINITY_DN11121_c1_g2_i2	--	K00430 peroxidase [EC:1.11.1.7] | (RefSeq) peroxidase P7-like (A)	PREDICTED: peroxidase P7-like [Brachypodium distachyon]	RecName: Full=Peroxidase 52; Short=Atperox P52; EC=1.11.1.7; AltName: Full=ATP49; Flags: Precursor;	RecName: Full=Peroxidase {ECO:0000256|RuleBase:RU362060, ECO:0000256|SAAS:SAAS00709852}; EC=1.11.1.7 {ECO:0000256|RuleBase:RU362060, ECO:0000256|SAAS:SAAS00709852};	--	GO:0048046,apoplast; GO:0005618,cell wall; GO:0005829,cytosol; GO:0005794,Golgi apparatus; GO:0020037,heme binding; GO:0046872,metal ion binding; GO:0004601,peroxidase activity; GO:0042744,hydrogen peroxide catabolic process; GO:0009809,lignin biosynthetic process; GO:1901430,positive regulation of syringal lignin biosynthetic process; GO:0006979,response to oxidative stress; GO:0010089,xylem dev…	Peroxidase
TRINITY_DN11121_c1_g2_i2.path2	0	0.15	0.12	0.88	0.9	0.93	0	3	2	14	18	18	8.17	3.03	0.00195817	0.0138184	up	6D	36275471	36276913	-	TRINITY_DN11121_c1_g2_i2	--	K00430 peroxidase [EC:1.11.1.7] | (RefSeq) peroxidase P7-like (A)	PREDICTED: peroxidase P7-like [Brachypodium distachyon]	RecName: Full=Peroxidase; EC=1.11.1.7; Flags: Fragment;	RecName: Full=Peroxidase {ECO:0000256|RuleBase:RU362060, ECO:0000256|SAAS:SAAS00709852}; EC=1.11.1.7 {ECO:0000256|RuleBase:RU362060, ECO:0000256|SAAS:SAAS00709852};	--	GO:0020037,heme binding; GO:0046872,metal ion binding; GO:0004601,peroxidase activity; GO:0042744,hydrogen peroxide catabolic process; GO:0006979,response to oxidative stress	--
TRINITY_DN111233_c0_g1_i1.path1	5.98	5.65	4.63	17.93	12.87	14.05	53	62	42	157	142	150	2.325	1.217	2.32353e-05	0.000321327	up	6A	46142826	46143385	+	TRINITY_DN111233_c0_g1_i1	--	--	--	--	--	--	--	--
TRINITY_DN11124_c0_g2_i1.path1	0	0.32	0.48	2.27	2.43	2.27	0	4	5	23	31	28	7.323	2.872	0.000186374	0.00192419	up	1C	143815935	143816581	+	TRINITY_DN11124_c0_g2_i1	--	K02881 large subunit ribosomal protein L18 | (RefSeq) uncharacterized protein LOC109746034 (A)	uncharacterized protein LOC109746034, partial [Aegilops tauschii subsp. tauschii]	--	SubName: Full=Uncharacterized protein {ECO:0000313|EnsemblPlants:TRIAE_CS42_1AL_TGACv1_001290_AA0028310.1};	--	GO:0005840,ribosome; GO:0003735,structural constituent of ribosome; GO:0006412,translation	--
TRINITY_DN11127_c2_g1_i1.path1	21.06	58.03	35.12	129.02	62.05	86.97	75	256	128	454	275	373	2.065	1.046	0.00101092	0.00800893	up	4C	502519521	502519745	+	TRINITY_DN11127_c2_g1_i1	--	K00012 UDPglucose 6-dehydrogenase [EC:1.1.1.22] | (RefSeq) UDP-glucose 6-dehydrogenase 1-like (A)	UDP-glucose 6-dehydrogenase isoform X1 [Zea mays]	RecName: Full=UDP-glucose 6-dehydrogenase 4; Short=UDP-Glc dehydrogenase 4; Short=UDP-GlcDH 4; Short=UDPGDH 4; EC=1.1.1.22; AltName: Full=Os-UGD4;	SubName: Full=Gpm540b {ECO:0000313|EMBL:JAE92721.1};	UDP-glucose/GDP-mannose dehydrogenase	GO:0005829,cytosol; GO:0005634,nucleus; GO:0051287,NAD binding; GO:0003979,UDP-glucose 6-dehydrogenase activity; GO:0006024,glycosaminoglycan biosynthetic process; GO:0006065,UDP-glucuronate biosynthetic process	--
TRINITY_DN11128_c0_g1_i8.path1	128.07	88.5	96.35	46.71	59.51	49.92	3566	3052	2745	1285	2062	1674	0.419	-1.254	1.04734e-10	4.36965e-09	down	3C	405969424	405971652	-	TRINITY_DN11128_c0_g1_i8	--	--	protein LNK4-like [Aegilops tauschii subsp. tauschii]	RecName: Full=Protein LNK1 {ECO:0000303|PubMed:23818596}; AltName: Full=Night light-inducible and clock-regulated 1 {ECO:0000303|PubMed:23818596};	SubName: Full=Uncharacterized protein {ECO:0000313|EnsemblPlants:TRIAE_CS42_1DS_TGACv1_081011_AA0256740.2};	--	GO:0005634,nucleus; GO:0006355,regulation of transcription, DNA-templated; GO:0048511,rhythmic process; GO:0006351,transcription, DNA-templated	--
TRINITY_DN11131_c0_g1_i2.path1	0.4	0.38	0.21	8.53	4.93	4.85	15	18	8	320	233	222	15.748	3.977	7.24656e-27	1.67286e-24	up	6C	533289612	533293198	-	TRINITY_DN11131_c0_g1_i2	--	K21383 anthocyanidin 3-O-glucoside 6''-O-acyltransferase [EC:2.3.1.215] | (RefSeq) anthocyanidin 3-O-glucoside 6''-O-acyltransferase-like (A)	predicted protein [Hordeum vulgare subsp. vulgare]	RecName: Full=Anthocyanin 5-aromatic acyltransferase; Short=5AT; EC=2.3.1.153;	SubName: Full=Uncharacterized protein {ECO:0000313|EnsemblPlants:TRIAE_CS42_6AS_TGACv1_485342_AA1543540.1};	--	GO:0005737,cytoplasm; GO:0047183,anthocyanin 5-aromatic acyltransferase activity; GO:0102815,caffeoyl-CoA:delphinidin-3,5-diglucoside 5-O-glucoside-6-O-hydroxycinnamoyltransferase activity; GO:0102777,caffeoyl-CoA:pelargonidin-3,5-diglucoside 5-O-glucoside-6-O-hydroxycinnamoyltransferase activity	Transferase family
TRINITY_DN111326_c0_g1_i1.path1	2.72	2.3	1.93	1	0.7	1.03	22	23	16	8	7	10	0.328	-1.609	0.00844951	0.0444839	down	6A	22044346	22044856	+	TRINITY_DN111326_c0_g1_i1	--	--	--	--	--	--	--	--
TRINITY_DN111404_c0_g1_i1.path1	0.5	0.8	0	5.02	2.19	4.73	2	4	0	20	11	23	7.572	2.921	0.002025	0.0142109	up	2C	526027235	526027705	-	TRINITY_DN111404_c0_g1_i1	--	--	--	--	--	--	--	--
TRINITY_DN111419_c0_g1_i1.path1	9.17	5.89	11.21	0.63	1.51	1.39	44	35	55	3	9	8	0.114	-3.137	1.46707e-08	4.179e-07	down	Chr00	61290296	61290598	+	TRINITY_DN111419_c0_g1_i1	--	--	--	--	--	--	--	--
TRINITY_DN11145_c0_g2_i1.path1	13.17	11.11	14.31	1.95	1.43	2.46	89	93	99	13	12	20	0.126	-2.992	4.64869e-15	3.83093e-13	down	4A	347150739	347151165	-	TRINITY_DN11145_c0_g2_i1	--	--	--	--	SubName: Full=Uncharacterized protein {ECO:0000313|EnsemblPlants:TRIAE_CS42_6DS_TGACv1_543477_AA1740590.1};	--	--	--
TRINITY_DN11145_c0_g2_i1.path2	22.04	19.23	20.53	1.5	0.12	1.11	149	161	142	10	1	9	0.035	-4.818	5.64632e-28	1.42973e-25	down	1D	467744347	467744773	-	TRINITY_DN11145_c0_g2_i1	--	--	--	--	SubName: Full=Uncharacterized protein {ECO:0000313|EnsemblPlants:TRIAE_CS42_6DS_TGACv1_543477_AA1740590.1};	--	--	--
TRINITY_DN11150_c0_g1_i1.path1	0.19	0.31	0.06	1.87	1.67	1.29	6	12	2	57	64	48	7.072	2.822	2.67179e-07	5.91942e-06	up	5C	152842344	152844291	+	TRINITY_DN11150_c0_g1_i1	--	--	--	--	--	--	--	--
TRINITY_DN11151_c0_g1_i1.path1	7.04	6.46	8.6	24.77	24.29	31.34	44	50	55	153	189	236	3.047	1.607	4.48605e-09	1.41441e-07	up	4A	222656485	222657306	-	TRINITY_DN11151_c0_g1_i1	--	K18857 alcohol dehydrogenase class-P [EC:1.1.1.1] | (RefSeq) alcohol dehydrogenase 3 (A)	predicted protein [Hordeum vulgare subsp. vulgare]	RecName: Full=Alcohol dehydrogenase 3; EC=1.1.1.1 {ECO:0000250|UniProtKB:P06525};	SubName: Full=Uncharacterized protein {ECO:0000313|EnsemblPlants:HORVU4Hr1G016770.13};	Alcohol dehydrogenase, class III	GO:0005737,cytoplasm; GO:0004022,alcohol dehydrogenase (NAD) activity; GO:0008270,zinc ion binding	Zinc-binding dehydrogenase
TRINITY_DN111528_c0_g1_i1.path1	8.25	15.99	16.82	4.77	8.9	7.83	35	84	73	20	47	40	0.441	-1.18	0.00306164	0.0198571	down	1D	473558965	473559232	-	TRINITY_DN111528_c0_g1_i1	--	K08332 vacuolar protein 8 | (RefSeq) hypothetical protein (A)	ARM REPEAT PROTEIN INTERACTING WITH ABF2-like [Aegilops tauschii subsp. tauschii]	--	SubName: Full=Uncharacterized protein {ECO:0000313|EnsemblPlants:HORVU4Hr1G085970.3};	FOG: Armadillo/beta-catenin-like repeats	--	--
TRINITY_DN111529_c0_g1_i1.path1	4.51	1.3	2.84	10.6	8.03	6.96	28	10	18	65	62	52	2.503	1.324	0.0048865	0.0288355	up	4C	269441767	269442158	+	TRINITY_DN111529_c0_g1_i1	--	--	--	--	--	--	--	--
TRINITY_DN111530_c0_g1_i1.path2	29.74	31.07	23.56	8.66	18.43	23.08	153	198	124	44	118	143	0.499	-1.002	0.000994598	0.00790611	down	3A	71717030	71717354	+	TRINITY_DN111530_c0_g1_i1	--	--	--	--	--	--	--	--
TRINITY_DN11160_c2_g1_i2.path1	13.3	10.87	7.24	25.65	27.29	23.4	244	247	136	465	623	517	2.059	1.042	4.7684e-06	7.87868e-05	up	5D	401002133	401003291	+	TRINITY_DN11160_c2_g1_i2	--	--	MYB-related protein [Triticum aestivum]	--	SubName: Full=MYB-related protein {ECO:0000313|EMBL:AEV91168.1, ECO:0000313|EnsemblPlants:TRIAE_CS42_5BL_TGACv1_405230_AA1322690.1};	--	--	--
TRINITY_DN111618_c0_g1_i1.path1	2.62	1.36	1.83	0.19	0.3	0	14	9	10	1	2	0	0.071	-3.807	0.00115519	0.00894043	down	7A	47241699	47242036	+	TRINITY_DN111618_c0_g1_i1	--	--	--	--	--	--	--	--
TRINITY_DN111618_c0_g1_i1.path2	49.05	27.45	19.98	7.33	3.58	5.09	264	183	110	39	24	33	0.139	-2.85	2.86288e-15	2.41641e-13	down	7D	347472031	347473884	-	TRINITY_DN111618_c0_g1_i1	--	--	--	--	--	--	--	--
TRINITY_DN11162_c0_g2_i2.path1	1.01	0.66	1.02	2.3	1.85	3.4	32	26	33	72	73	130	2.341	1.227	0.000858421	0.00701333	up	5C	607379981	607382437	-	TRINITY_DN11162_c0_g2_i2	--	K01213 galacturan 1,4-alpha-galacturonidase [EC:3.2.1.67] | (RefSeq) probable polygalacturonase At1g80170 (A)	probable polygalacturonase isoform X1 [Aegilops tauschii subsp. tauschii]	RecName: Full=Probable polygalacturonase; Short=PG {ECO:0000250|UniProtKB:Q7M1E7}; EC=3.2.1.15; AltName: Full=Pectinase {ECO:0000250|UniProtKB:Q7M1E7};	SubName: Full=Uncharacterized protein {ECO:0000313|EnsemblPlants:TRIAE_CS42_4AL_TGACv1_288772_AA0957720.1};	--	GO:0016021,integral component of membrane; GO:0004650,polygalacturonase activity; GO:0005975,carbohydrate metabolic process	Glycosyl hydrolases family 28
TRINITY_DN111634_c0_g1_i1.path1	6.33	6.09	5.01	1.37	4.36	3.26	42	50	34	9	36	26	0.439	-1.188	0.00978056	0.0498611	down	7C	546229606	546230024	-	TRINITY_DN111634_c0_g1_i1	--	--	--	--	--	--	--	--
TRINITY_DN11164_c0_g1_i2.path2	0.81	1.6	2.54	5.83	4.43	5.14	13	32	42	93	89	100	2.598	1.378	0.000486095	0.00434759	up	5A	461118564	461119686	-	TRINITY_DN11164_c0_g1_i2	--	K03505 DNA polymerase delta subunit 4 | (RefSeq) LOC109780536; DNA polymerase delta subunit 4 (A)	DNA polymerase delta subunit 4 [Aegilops tauschii subsp. tauschii]	--	SubName: Full=Uncharacterized protein {ECO:0000313|EnsemblPlants:TRIAE_CS42_5DL_TGACv1_433569_AA1416390.1};	--	GO:0005634,nucleus; GO:0006260,DNA replication	DNA polymerase delta, subunit 4
TRINITY_DN11165_c0_g1_i4.path1	22.03	17.6	18.06	6.73	7.16	9.01	739	731	620	223	299	364	0.332	-1.59	8.32602e-17	8.34644e-15	down	4A	189692413	189694531	-	TRINITY_DN11165_c0_g1_i4	--	K03083 glycogen synthase kinase 3 beta [EC:2.7.11.26] | (RefSeq) glutathione S-transferase T3-like (A)	nucleolin-like [Aegilops tauschii subsp. tauschii]	--	SubName: Full=Uncharacterized protein {ECO:0000313|EnsemblPlants:TRIAE_CS42_3DL_TGACv1_249029_AA0835100.1};	--	--	No apical meristem-associated C-terminal domain
TRINITY_DN111654_c0_g1_i1.path1	0.24	0.64	0.6	3.03	3	2.64	4	13	10	49	61	52	4.888	2.289	5.0899e-06	8.36081e-05	up	2D	488696636	488697668	-	TRINITY_DN111654_c0_g1_i1	--	--	uncharacterized protein LOC8054533 [Sorghum bicolor]	--	SubName: Full=Uncharacterized protein {ECO:0000313|EMBL:EER97859.1};	--	GO:0016021,integral component of membrane	Protein of unknown function, DUF594
TRINITY_DN111654_c0_g1_i1.path2	1.67	1.79	1.87	6.59	5.62	5.86	28	37	32	109	117	118	2.852	1.512	1.85207e-06	3.40363e-05	up	1A	424657790	424658846	-	TRINITY_DN111654_c0_g1_i1	--	--	uncharacterized protein LOC8054533 [Sorghum bicolor]	--	SubName: Full=Uncharacterized protein {ECO:0000313|EMBL:EER97859.1};	--	GO:0016021,integral component of membrane	Protein of unknown function, DUF594
TRINITY_DN111686_c0_g1_i1.path1	0	0	0	4.58	4.43	3.27	0	0	0	23	28	20	103.371	6.692	7.64809e-07	1.54352e-05	up	1D	451008706	451009026	-	TRINITY_DN111686_c0_g1_i1	--	--	--	--	--	--	--	--
TRINITY_DN111690_c0_g1_i1.path1	0.29	1.73	0.14	6.64	6.99	6.63	2	15	1	46	61	56	7.745	2.953	1.36572e-06	2.59185e-05	up	1D	342782400	342782842	-	TRINITY_DN111690_c0_g1_i1	--	--	--	--	--	--	--	--
TRINITY_DN11170_c0_g1_i1.path2	1.39	1.84	2.17	0.28	0.27	0.97	25	41	40	5	6	21	0.233	-2.1	0.000195529	0.00200042	down	3C	568860322	568861458	+	TRINITY_DN11170_c0_g1_i1	--	K03695 ATP-dependent Clp protease ATP-binding subunit ClpB | (RefSeq) LOC109758392; chaperone protein ClpB1-like (A)	chaperone protein ClpB1-like [Aegilops tauschii subsp. tauschii]	RecName: Full=Chaperone protein ClpB1; AltName: Full=ATP-dependent Clp protease ATP-binding subunit ClpB homolog 1; AltName: Full=Casein lytic proteinase B1; AltName: Full=Heat shock protein 101;	SubName: Full=Uncharacterized protein {ECO:0000313|EnsemblPlants:HORVU3Hr1G071120.5};	Chaperone HSP104 and related ATP-dependent Clp proteases	GO:0005829,cytosol; GO:0005634,nucleus; GO:0005524,ATP binding; GO:0034605,cellular response to heat; GO:0019538,protein metabolic process	--
TRINITY_DN111706_c0_g1_i1.path1	2.75	3.5	4.24	0.15	0.23	0.72	19	30	30	1	2	6	0.089	-3.496	2.4031e-06	4.29336e-05	down	4D	288856646	288857082	+	TRINITY_DN111706_c0_g1_i1	--	K04733 interleukin-1 receptor-associated kinase 4 [EC:2.7.11.1] | (RefSeq) probable LRR receptor-like serine/threonine-protein kinase At2g16250 (A)	PREDICTED: probable LRR receptor-like serine/threonine-protein kinase At2g16250 [Brachypodium distachyon]	RecName: Full=Probable LRR receptor-like serine/threonine-protein kinase At2g16250; EC=2.7.11.1; Flags: Precursor;	SubName: Full=Uncharacterized protein {ECO:0000313|EMBL:KQK12980.1, ECO:0000313|EnsemblPlants:BRADI1G07200.1};	--	GO:0016021,integral component of membrane; GO:0009505,plant-type cell wall; GO:0005886,plasma membrane; GO:0009506,plasmodesma; GO:0005524,ATP binding; GO:0004674,protein serine/threonine kinase activity	--
TRINITY_DN111740_c0_g1_i1.path1	136.75	75.81	73.36	23.82	33.25	28.6	552	379	303	95	167	139	0.252	-1.987	1.08435e-13	7.23349e-12	down	4A	357886821	357887075	-	TRINITY_DN111740_c0_g1_i1	--	--	hypothetical protein BAE44_0019537 [Dichanthelium oligosanthes]	--	SubName: Full=Uncharacterized protein {ECO:0000313|EMBL:OEL19443.1};	--	--	--
TRINITY_DN111785_c0_g1_i1.path1	1.29	1.91	2.11	8.29	6.06	9.31	6	11	10	38	35	52	3.715	1.893	0.000305819	0.00292926	up	7C	39035036	39035328	-	TRINITY_DN111785_c0_g1_i1	--	--	--	--	--	--	--	--
TRINITY_DN111855_c0_g1_i1.path1	27.1	24.78	18.89	3.23	7.85	5.96	136	154	97	16	49	36	0.205	-2.286	1.09592e-11	5.43348e-10	down	7A	484076754	484077070	-	TRINITY_DN111855_c0_g1_i1	--	--	--	--	--	--	--	--
TRINITY_DN111870_c0_g1_i1.path2	2.23	1.66	2.34	0.35	0.69	0.28	13	12	14	2	5	2	0.18	-2.471	0.00399545	0.0245432	down	1A	320028524	320028892	-	TRINITY_DN111870_c0_g1_i1	--	--	--	--	--	--	--	--
TRINITY_DN111924_c0_g1_i1.path1	0	0.19	0	3.73	1.85	11.87	0	1	0	16	10	62	62.321	5.962	1.72333e-05	0.000246745	up	1C	421893895	421894168	+	TRINITY_DN111924_c0_g1_i1	--	--	--	--	--	--	--	--
TRINITY_DN111942_c0_g1_i1.path1	6.4	6.76	4.33	17.94	12.13	16.49	39	51	27	108	92	121	2.238	1.162	0.000360158	0.00337422	up	6C	180544094	180544478	-	TRINITY_DN111942_c0_g1_i1	--	--	--	--	--	--	--	--
TRINITY_DN111948_c0_g1_i1.path1	11.93	35.99	17.48	4.74	7.64	6.96	84	314	126	33	67	59	0.252	-1.986	2.67195e-08	7.18862e-07	down	3D	320074413	320074857	+	TRINITY_DN111948_c0_g1_i1	--	--	--	--	--	--	--	--
TRINITY_DN112004_c0_g1_i1.path1	12.25	8.87	9.71	4.7	5.94	4.04	58	52	47	22	35	23	0.402	-1.313	0.000943869	0.00757694	down	5C	553757425	553757723	+	TRINITY_DN112004_c0_g1_i1	--	--	--	--	--	--	--	--
TRINITY_DN11202_c1_g1_i1.path1	6.48	10.46	4.44	61.18	42.09	38.97	57	114	40	532	461	413	5.657	2.5	1.7147e-18	2.03042e-16	up	5C	367359455	367360160	-	TRINITY_DN11202_c1_g1_i1	--	--	NAC domain transcription factor [Triticum aestivum]	RecName: Full=NAC transcription factor 25; Short=AtNAC025;	SubName: Full=NAC domain transcription factor {ECO:0000313|EMBL:AAU08785.1, ECO:0000313|EnsemblPlants:TRIAE_CS42_5BL_TGACv1_405234_AA1322970.1};	--	GO:0005634,nucleus; GO:0003677,DNA binding; GO:0003700,DNA-binding transcription factor activity; GO:0009793,embryo development ending in seed dormancy; GO:0006351,transcription, DNA-templated	--
TRINITY_DN112036_c0_g1_i1.path1	5.6	7.4	5.31	2.06	2.73	4.23	33	54	32	12	20	30	0.414	-1.271	0.00450347	0.0270209	down	2C	238017170	238017541	-	TRINITY_DN112036_c0_g1_i1	--	--	--	--	--	--	--	--
TRINITY_DN112049_c0_g1_i1.path1	0.5	0.73	0.49	10.54	6.92	8.31	5	9	5	104	86	100	12.527	3.647	2.78455e-14	2.01753e-12	up	4C	464936289	464936919	+	TRINITY_DN112049_c0_g1_i1	--	--	--	--	--	--	--	--
TRINITY_DN112063_c0_g1_i1.path1	4.51	2.43	2.7	0	0.4	1.67	18	12	11	0	2	8	0.181	-2.468	0.00683233	0.0376777	down	6C	515174516	515174767	-	TRINITY_DN112063_c0_g1_i1	--	--	--	--	--	--	--	--
TRINITY_DN11208_c0_g1_i4.path1	3.81	5.5	2.85	16.3	19.33	15.6	128	229	98	541	808	631	3.577	1.839	1.45643e-15	1.26881e-13	up	7C	222161608	222164862	-	TRINITY_DN11208_c0_g1_i4	--	K13427 nitric-oxide synthase, plant [EC:1.14.13.39] | (RefSeq) NO-associated protein 1, chloroplastic/mitochondrial (A)	GTP-binding protein BRASSINAZOLE INSENSITIVE PALE GREEN 2, chloroplastic [Aegilops tauschii subsp. tauschii]	RecName: Full=GTP-binding protein BRASSINAZOLE INSENSITIVE PALE GREEN 2, chloroplastic {ECO:0000303|PubMed:19919572}; Short=Protein BRZ-INSENSITIVE-PALE GREEN 2 {ECO:0000303|PubMed:19919572}; Flags: Precursor;	SubName: Full=Uncharacterized protein {ECO:0000313|EnsemblPlants:TRIAE_CS42_5AS_TGACv1_395108_AA1282620.1};	Predicted GTPases	GO:0009507,chloroplast; GO:0009570,chloroplast stroma; GO:0005739,mitochondrion; GO:0005525,GTP binding; GO:0003924,GTPase activity; GO:0019843,rRNA binding; GO:0009742,brassinosteroid mediated signaling pathway; GO:0009658,chloroplast organization; GO:1901259,chloroplast rRNA processing; GO:0032502,developmental process; GO:1904143,positive regulation of carotenoid biosynthetic process; GO:19023…	50S ribosome-binding GTPase
TRINITY_DN1121_c0_g1_i2.path1	1.12	1.56	2.36	16.47	6.66	14.2	39	67	84	565	288	594	6.155	2.622	7.50147e-16	6.78554e-14	up	5A	45124980	45128533	-	TRINITY_DN1121_c0_g1_i2	--	K01913 acetate---CoA ligase [EC:6.2.1.1] | (RefSeq) LOC109737755; acetate/butyrate--CoA ligase AAE7, peroxisomal-like (A)	acetate/butyrate--CoA ligase AAE7, peroxisomal-like [Aegilops tauschii subsp. tauschii]	RecName: Full=Acetate/butyrate--CoA ligase AAE7, peroxisomal; EC=6.2.1.1; EC=6.2.1.2; AltName: Full=AMP-binding protein 7; Short=AtAMPBP7; AltName: Full=Acetyl-CoA synthetase; AltName: Full=Acyl-activating enzyme 7; AltName: Full=Butyryl-CoA synthetase; AltName: Full=Protein ACETATE NON-UTILIZING 1;	SubName: Full=Uncharacterized protein {ECO:0000313|EnsemblPlants:TRIAE_CS42_4AS_TGACv1_307572_AA1021530.1};	Acyl-CoA synthetase	GO:0005777,peroxisome; GO:0003987,acetate-CoA ligase activity; GO:0047760,butyrate-CoA ligase activity; GO:0006083,acetate metabolic process; GO:0019605,butyrate metabolic process; GO:0006097,glyoxylate cycle	AMP-binding enzyme
TRINITY_DN1121_c1_g2_i3.path1	5.56	4.83	4.07	12.15	10.83	12.14	132	142	99	285	320	347	2.044	1.031	2.16648e-06	3.90494e-05	up	2D	476032892	476034624	-	TRINITY_DN1121_c1_g2_i3	--	K00666 fatty-acyl-CoA synthase [EC:6.2.1.-] | (RefSeq) probable acyl-activating enzyme 1, peroxisomal (A)	probable acyl-activating enzyme 1, peroxisomal [Aegilops tauschii subsp. tauschii]	RecName: Full=Probable acyl-activating enzyme 1, peroxisomal; EC=6.2.1.-; AltName: Full=AMP-binding protein 1; Short=AtAMPBP1;	SubName: Full=Uncharacterized protein {ECO:0000313|EnsemblPlants:HORVU6Hr1G011140.4};	Acyl-CoA synthetase	GO:0005777,peroxisome; GO:0016874,ligase activity; GO:0006631,fatty acid metabolic process	--
TRINITY_DN1121_c1_g2_i3.path2	3.17	4.81	4.89	14.6	12	13.92	76	143	120	346	358	402	2.64	1.401	1.87961e-09	6.42014e-08	up	1A	414276205	414277997	+	TRINITY_DN1121_c1_g2_i3	--	K00666 fatty-acyl-CoA synthase [EC:6.2.1.-] | (RefSeq) probable acyl-activating enzyme 1, peroxisomal (A)	probable acyl-activating enzyme 1, peroxisomal [Aegilops tauschii subsp. tauschii]	RecName: Full=Probable acyl-activating enzyme 1, peroxisomal; EC=6.2.1.-; AltName: Full=AMP-binding protein 1; Short=AtAMPBP1;	SubName: Full=Uncharacterized protein {ECO:0000313|EnsemblPlants:TRIAE_CS42_6BS_TGACv1_513952_AA1652790.1};	Acyl-CoA synthetase	GO:0005777,peroxisome; GO:0016874,ligase activity; GO:0006631,fatty acid metabolic process	AMP-binding enzyme
TRINITY_DN112106_c0_g1_i1.path1	53.7	67.58	80.52	32.5	31.31	45.25	204	318	313	122	148	207	0.45	-1.151	1.46646e-06	2.75801e-05	down	2C	467476737	467476976	-	TRINITY_DN112106_c0_g1_i1	--	--	--	--	--	--	--	--
TRINITY_DN112121_c0_g1_i1.path1	22.08	10.59	14.53	1.77	5.45	4.36	101	60	68	8	31	24	0.208	-2.268	1.99027e-07	4.53725e-06	down	3D	78022446	78022734	+	TRINITY_DN112121_c0_g1_i1	--	--	--	--	--	--	--	--
TRINITY_DN112121_c0_g1_i1.path2	9.5	8.74	7.56	2.46	3.91	3.49	43	49	35	11	22	19	0.323	-1.628	0.000231087	0.00230989	down	3A	306305131	306305416	-	TRINITY_DN112121_c0_g1_i1	--	--	--	--	--	--	--	--
TRINITY_DN11217_c0_g1_i1.path1	0.46	0.51	0.29	1.32	1.11	2.06	11	15	7	31	33	59	2.98	1.575	0.00230287	0.0157644	up	Chr00	108695523	108698395	+	TRINITY_DN11217_c0_g1_i1	--	K04733 interleukin-1 receptor-associated kinase 4 [EC:2.7.11.1] | (RefSeq) uncharacterized protein LOC109783670 (A)	uncharacterized protein LOC109783670 [Aegilops tauschii subsp. tauschii]	RecName: Full=G-type lectin S-receptor-like serine/threonine-protein kinase At1g61480; EC=2.7.11.1; Flags: Precursor;	SubName: Full=Uncharacterized protein {ECO:0000313|EnsemblPlants:TRIAE_CS42_4BL_TGACv1_320978_AA1052930.1};	--	GO:0016021,integral component of membrane; GO:0005886,plasma membrane; GO:0005524,ATP binding; GO:0005516,calmodulin binding; GO:0030246,carbohydrate binding; GO:0004674,protein serine/threonine kinase activity; GO:0006468,protein phosphorylation; GO:0048544,recognition of pollen	Protein kinase domain
TRINITY_DN112199_c0_g1_i1.path1	0	0.21	0	7.22	2.34	2.19	0	1	0	27	11	10	37.823	5.241	0.000276098	0.00268072	up	6A	12222832	12223070	-	TRINITY_DN112199_c0_g1_i1	--	--	hypothetical protein BRADI_4g29315v3 [Brachypodium distachyon]	--	SubName: Full=Uncharacterized protein {ECO:0000313|EMBL:KQJ95616.1}; Flags: Fragment;	--	--	--
TRINITY_DN112199_c0_g1_i1.path2	0	0.65	0	8.9	7.07	6.64	0	3	0	33	33	30	26.889	4.749	3.53572e-06	6.06945e-05	up	2D	434409947	434410183	+	TRINITY_DN112199_c0_g1_i1	--	--	--	--	--	--	--	--
TRINITY_DN11225_c0_g1_i1.path1	5.91	6.08	3.15	18.09	15.77	8.71	44	56	24	133	146	78	2.4	1.263	0.000606783	0.00524557	up	4C	423864982	423865780	-	TRINITY_DN11225_c0_g1_i1	--	K16296 serine carboxypeptidase-like clade I [EC:3.4.16.-] | (RefSeq) serine carboxypeptidase-like 3 (A)	hypothetical protein BRADI_4g21645v3 [Brachypodium distachyon]	RecName: Full=Serine carboxypeptidase-like 9; AltName: Full=Sinapoylglucose--sinapoylglucose O-sinapoyltransferase; Short=SST; EC=2.3.1.103; AltName: Full=Sinapoylglucose--sinapoylglucose acyltransferase; Flags: Precursor;	SubName: Full=Uncharacterized protein {ECO:0000313|EMBL:KQJ88836.1};	Serine carboxypeptidases (lysosomal cathepsin A)	GO:0005576,extracellular region; GO:0047158,sinapoylglucose-sinapoylglucose O-sinapoyltransferase activity; GO:0016747,transferase activity, transferring acyl groups other than amino-acyl groups; GO:0006508,proteolysis; GO:0019748,secondary metabolic process	Serine carboxypeptidase
TRINITY_DN11230_c0_g2_i1.path1	0.42	0.6	0.96	3.02	2.85	2.6	9	16	21	64	76	67	3.592	1.845	1.88371e-05	0.000266631	up	7A	361894955	361898236	-	TRINITY_DN11230_c0_g2_i1	--	K00021 hydroxymethylglutaryl-CoA reductase (NADPH) [EC:1.1.1.34] | (RefSeq) LOC109746630; 3-hydroxy-3-methylglutaryl-coenzyme A reductase 3 (A)	predicted protein [Hordeum vulgare subsp. vulgare]	RecName: Full=3-hydroxy-3-methylglutaryl-coenzyme A reductase 3; Short=HMG-CoA reductase 3; EC=1.1.1.34;	SubName: Full=3-hydroxy-3-methylglutaryl coenzyme A reductase {ECO:0000313|EnsemblPlants:TRIAE_CS42_7BS_TGACv1_592703_AA1943380.1};	3-hydroxy-3-methylglutaryl-CoA (HMG-CoA) reductase	GO:0005789,endoplasmic reticulum membrane; GO:0016021,integral component of membrane; GO:0005778,peroxisomal membrane; GO:0004420,hydroxymethylglutaryl-CoA reductase (NADPH) activity; GO:0050661,NADP binding; GO:0015936,coenzyme A metabolic process; GO:0008299,isoprenoid biosynthetic process; GO:0016126,sterol biosynthetic process	Hydroxymethylglutaryl-coenzyme A reductase
TRINITY_DN112305_c0_g1_i1.path1	0.18	0.43	0	1.26	2.01	2.67	1	3	0	7	14	18	7.925	2.986	0.00788478	0.0421753	up	1C	431329961	431330314	-	TRINITY_DN112305_c0_g1_i1	--	--	--	--	--	--	--	--
TRINITY_DN11232_c0_g1_i6.path2	6.26	8.69	4.47	13.66	18.11	17.47	238	409	174	513	857	800	2.149	1.104	7.04373e-07	1.42943e-05	up	2A	320106242	320110758	-	TRINITY_DN11232_c0_g1_i6	--	K04077 chaperonin GroEL | (RefSeq) chaperonin 60 subunit beta 4, chloroplastic-like (A)	PREDICTED: chaperonin 60 subunit beta 4, chloroplastic-like [Brachypodium distachyon]	RecName: Full=Chaperonin 60 subunit beta 4, chloroplastic; Short=CPN-60 beta 4; Flags: Precursor;	SubName: Full=Uncharacterized protein {ECO:0000313|EnsemblPlants:HORVU2Hr1G077410.10};	Mitochondrial chaperonin, Cpn60/Hsp60p	GO:0009507,chloroplast; GO:0009941,chloroplast envelope; GO:0009570,chloroplast stroma; GO:0005829,cytosol; GO:0005524,ATP binding; GO:0044183,protein binding involved in protein folding; GO:0051082,unfolded protein binding; GO:0006458,'de novo' protein folding; GO:0061077,chaperone-mediated protein folding; GO:0006457,protein folding; GO:0042026,protein refolding	TCP-1/cpn60 chaperonin family
TRINITY_DN11233_c0_g1_i7.path1	0.9	1.62	1.51	11.55	4.17	14.12	29	65	50	369	168	550	6.141	2.618	2.26961e-13	1.44928e-11	up	5D	99450853	99452992	-	TRINITY_DN11233_c0_g1_i7	--	K13260 isoflavone/4'-methoxyisoflavone 2'-hydroxylase [EC:1.14.14.90 1.14.14.89] | (RefSeq) cytochrome P450 81E8-like (A)	isoflavone 3'-hydroxylase-like [Aegilops tauschii subsp. tauschii]	RecName: Full=Cytochrome P450 81D11; EC=1.14.-.-;	SubName: Full=Uncharacterized protein {ECO:0000313|EnsemblPlants:TRIAE_CS42_2DL_TGACv1_158376_AA0516880.1};	Cytochrome P450 CYP2 subfamily	GO:0016021,integral component of membrane; GO:0016020,membrane; GO:0020037,heme binding; GO:0005506,iron ion binding; GO:0016709,oxidoreductase activity, acting on paired donors, with incorporation or reduction of molecular oxygen, NAD(P)H as one donor, and incorporation of one atom of oxygen; GO:0002213,defense response to insect; GO:0098542,defense response to other organism; GO:0042343,indole …	Cytochrome P450
TRINITY_DN11233_c1_g1_i1.path1	0.94	0.76	1.93	7.69	2.01	13.4	9	9	19	73	24	155	5.209	2.381	2.80849e-05	0.000378216	up	5A	132283972	132284578	+	TRINITY_DN11233_c1_g1_i1	--	--	--	--	--	--	--	--
TRINITY_DN11237_c0_g1_i5.path1	0.49	0.63	0.58	1.78	1.7	1.3	18	29	22	65	78	58	2.369	1.244	0.00142593	0.0106131	up	6C	12595597	12598086	-	TRINITY_DN11237_c0_g1_i5	--	K05284 phosphatidylinositol glycan, class M [EC:2.4.1.-] | (RefSeq) GPI mannosyltransferase 1 (A)	GPI mannosyltransferase 1 [Triticum urartu]	RecName: Full=GPI mannosyltransferase 1; EC=2.4.1.-; AltName: Full=GPI mannosyltransferase I; Short=GPI-MT-I; AltName: Full=Phosphatidylinositol-glycan biosynthesis class M protein; Short=PIG-M; AltName: Full=Protein PEANUT 1;	SubName: Full=Uncharacterized protein {ECO:0000313|EMBL:JAD58164.1};	Mannosyltransferase	GO:0005789,endoplasmic reticulum membrane; GO:0016021,integral component of membrane; GO:0016758,transferase activity, transferring hexosyl groups; GO:0006506,GPI anchor biosynthetic process	Mannosyltransferase (PIG-M)
TRINITY_DN112420_c0_g1_i1.path1	9.18	10.34	13.06	1.97	0.67	6.47	33	46	48	7	3	28	0.229	-2.124	0.000242524	0.00240679	down	5D	380046344	380046570	-	TRINITY_DN112420_c0_g1_i1	--	--	--	--	--	--	--	--
TRINITY_DN112444_c0_g1_i1.path2	12.84	9.21	11.35	3.3	6.71	7.62	63	56	57	16	41	45	0.444	-1.173	0.00279165	0.0184344	down	2A	369898263	369898572	+	TRINITY_DN112444_c0_g1_i1	--	--	predicted protein [Hordeum vulgare subsp. vulgare]	--	SubName: Full=Predicted protein {ECO:0000313|EMBL:BAJ87116.1};	--	GO:0097367,carbohydrate derivative binding; GO:0016853,isomerase activity; GO:1901135,carbohydrate derivative metabolic process	--
TRINITY_DN11246_c0_g1_i5.path1	18.84	26.54	25.63	70.42	58.21	47.95	309	539	430	1141	1188	947	2.103	1.072	5.31643e-07	1.10652e-05	up	2D	380058115	380060931	+	TRINITY_DN11246_c0_g1_i5	--	K03671 thioredoxin 1 | (RefSeq) thioredoxin M2, chloroplastic-like (A)	PREDICTED: thioredoxin M2, chloroplastic-like [Brachypodium distachyon]	RecName: Full=Thioredoxin M2, chloroplastic; Short=OsTrxm2; AltName: Full=OsTrx14; Flags: Precursor;	SubName: Full=Uncharacterized protein {ECO:0000313|EMBL:KQJ83736.1, ECO:0000313|EnsemblPlants:BRADI5G16550.1};	Thioredoxin-like protein	GO:0009507,chloroplast; GO:0005737,cytoplasm; GO:0016671,oxidoreductase activity, acting on a sulfur group of donors, disulfide as acceptor; GO:0015035,protein disulfide oxidoreductase activity; GO:0047134,protein-disulfide reductase activity; GO:0004791,thioredoxin-disulfide reductase activity; GO:0045454,cell redox homeostasis; GO:0034599,cellular response to oxidative stress; GO:0006662,glycer…	Thioredoxin
TRINITY_DN11248_c0_g2_i2.path2	0.83	1.41	1.92	5.19	4.62	4.08	27	57	64	167	187	160	2.799	1.485	3.35596e-06	5.79485e-05	up	2D	78503941	78508294	+	TRINITY_DN11248_c0_g2_i2	--	--	transcription factor PCF6-like [Aegilops tauschii subsp. tauschii]	RecName: Full=Transcription factor PCF6;	SubName: Full=Uncharacterized protein {ECO:0000313|EnsemblPlants:TRIAE_CS42_2DL_TGACv1_158763_AA0525740.1};	--	GO:0005634,nucleus; GO:0003677,DNA binding; GO:0007275,multicellular organism development; GO:0006355,regulation of transcription, DNA-templated; GO:0006351,transcription, DNA-templated	TCP family transcription factor
TRINITY_DN112482_c0_g1_i1.path1	0.22	0	0.22	7.4	2.14	2.95	1	0	1	33	12	16	25.291	4.661	0.000194261	0.00198967	up	6A	349651687	349651971	+	TRINITY_DN112482_c0_g1_i1	--	--	--	--	--	--	--	--
TRINITY_DN11251_c0_g1_i4.path1	0.38	0.54	0.4	0.53	1.04	3.16	13	23	14	18	44	130	2.933	1.552	0.00480652	0.0284529	up	2D	36078298	36083576	+	TRINITY_DN11251_c0_g1_i4	--	K16296 serine carboxypeptidase-like clade I [EC:3.4.16.-] | (RefSeq) serine carboxypeptidase 1 (A)	PREDICTED: serine carboxypeptidase 1 [Brachypodium distachyon]	RecName: Full=Serine carboxypeptidase 1; EC=3.4.16.5; AltName: Full=CP-MI; AltName: Full=Carboxypeptidase C; AltName: Full=Serine carboxypeptidase I; Contains: RecName: Full=Serine carboxypeptidase 1 chain A; AltName: Full=Serine carboxypeptidase I chain A; Contains: RecName: Full=Serine carboxypeptidase 1 chain B; AltName: Full=Serine carboxypeptidase I chain B; Flags: Precursor;	RecName: Full=Carboxypeptidase {ECO:0000256|RuleBase:RU361156}; EC=3.4.16.- {ECO:0000256|RuleBase:RU361156};	Serine carboxypeptidases (lysosomal cathepsin A)	GO:0005576,extracellular region; GO:0004185,serine-type carboxypeptidase activity	Serine carboxypeptidase
TRINITY_DN11251_c0_g1_i4.path2	0.21	0.12	0.35	1.16	1.11	2.33	7	5	12	39	47	95	5.724	2.517	2.73542e-06	4.81769e-05	up	2A	282401261	282406503	-	TRINITY_DN11251_c0_g1_i4	--	K16296 serine carboxypeptidase-like clade I [EC:3.4.16.-] | (RefSeq) serine carboxypeptidase 1 (A)	PREDICTED: serine carboxypeptidase 1 [Brachypodium distachyon]	RecName: Full=Serine carboxypeptidase 1; EC=3.4.16.5; AltName: Full=CP-MI; AltName: Full=Carboxypeptidase C; AltName: Full=Serine carboxypeptidase I; Contains: RecName: Full=Serine carboxypeptidase 1 chain A; AltName: Full=Serine carboxypeptidase I chain A; Contains: RecName: Full=Serine carboxypeptidase 1 chain B; AltName: Full=Serine carboxypeptidase I chain B; Flags: Precursor;	RecName: Full=Carboxypeptidase {ECO:0000256|RuleBase:RU361156}; EC=3.4.16.- {ECO:0000256|RuleBase:RU361156};	Serine carboxypeptidases (lysosomal cathepsin A)	GO:0005576,extracellular region; GO:0004185,serine-type carboxypeptidase activity	Serine carboxypeptidase
TRINITY_DN112550_c0_g1_i1.path1	8.28	5.98	5.11	1.98	2.45	3.98	38	34	24	9	14	22	0.365	-1.453	0.00386106	0.0238881	down	1D	468453706	468455082	+	TRINITY_DN112550_c0_g1_i1	--	--	--	--	--	--	--	--
TRINITY_DN112588_c0_g1_i1.path1	1.39	0.19	1.13	5.15	3.91	5.19	6	1	5	22	21	27	4.482	2.164	0.00364044	0.0228229	up	6A	4431672	4431944	-	TRINITY_DN112588_c0_g1_i1	--	--	--	--	--	--	--	--
TRINITY_DN11259_c0_g1_i1.path1	0.63	0.82	0.43	1.98	1.32	1.47	24	39	17	75	63	68	2.138	1.096	0.00487691	0.0287882	up	4D	360474425	360478375	-	TRINITY_DN11259_c0_g1_i1	--	--	uncharacterized protein LOC109762846 [Aegilops tauschii subsp. tauschii]	--	SubName: Full=Uncharacterized protein {ECO:0000313|EnsemblPlants:TRIAE_CS42_6DS_TGACv1_542958_AA1733380.1};	--	--	--
TRINITY_DN112606_c0_g1_i1.path2	8.95	0.9	1.64	0	0.45	1.62	32	4	6	0	2	7	0.151	-2.726	0.00882226	0.0459963	down	2D	281054448	281054673	+	TRINITY_DN112606_c0_g1_i1	--	--	--	--	--	--	--	--
TRINITY_DN11261_c0_g1_i1.path1	719.33	694.39	703.61	354.18	352.07	430.23	3507	4193	3510	1706	2136	2526	0.449	-1.154	1.1353e-14	8.89508e-13	down	5C	323128828	323129135	-	TRINITY_DN11261_c0_g1_i1	--	K10355 actin, other eukaryote | (RefSeq) actin-1 (A)	actin, partial [Aconitum balfourii]	RecName: Full=Actin-85C; Flags: Fragment;	SubName: Full=Actin {ECO:0000313|EMBL:AGA83501.1}; Flags: Fragment;	Actin and related proteins	GO:0005737,cytoplasm; GO:0005856,cytoskeleton; GO:0005524,ATP binding	Actin
TRINITY_DN112641_c0_g1_i1.path1	9.91	8.85	10.25	4.48	5.34	1.94	85	94	90	38	57	20	0.344	-1.541	4.71707e-05	0.000592365	down	5A	405873353	405873894	-	TRINITY_DN112641_c0_g1_i1	--	K04733 interleukin-1 receptor-associated kinase 4 [EC:2.7.11.1] | (RefSeq) probable leucine-rich repeat receptor-like protein kinase At5g49770 (A)	probable leucine-rich repeat receptor-like protein kinase At5g49770 [Aegilops tauschii subsp. tauschii]	RecName: Full=Probable leucine-rich repeat receptor-like protein kinase At5g49770; EC=2.7.11.1; Flags: Precursor;	SubName: Full=Uncharacterized protein {ECO:0000313|EnsemblPlants:HORVU3Hr1G017020.4};	--	GO:0016021,integral component of membrane; GO:0005524,ATP binding; GO:0004674,protein serine/threonine kinase activity	Protein tyrosine kinase
TRINITY_DN112641_c0_g1_i1.path2	4.99	7.69	4.65	2.7	2.05	2.41	43	82	41	23	22	25	0.348	-1.524	0.000140767	0.00151443	down	5D	367714423	367714966	-	TRINITY_DN112641_c0_g1_i1	--	--	--	--	--	--	--	--
TRINITY_DN112641_c0_g1_i1.path3	7.4	6.92	6.54	2.02	2.55	1.17	63	73	57	17	27	12	0.233	-2.101	3.05254e-07	6.68431e-06	down	5C	475445827	475446364	-	TRINITY_DN112641_c0_g1_i1	--	K04733 interleukin-1 receptor-associated kinase 4 [EC:2.7.11.1] | (RefSeq) probable leucine-rich repeat receptor-like protein kinase At5g49770 (A)	probable leucine-rich repeat receptor-like protein kinase At5g49770 [Aegilops tauschii subsp. tauschii]	RecName: Full=Probable leucine-rich repeat receptor-like protein kinase At5g49770; EC=2.7.11.1; Flags: Precursor;	SubName: Full=Uncharacterized protein {ECO:0000313|EnsemblPlants:HORVU3Hr1G017020.4};	--	GO:0016021,integral component of membrane; GO:0005524,ATP binding; GO:0004674,protein serine/threonine kinase activity	Protein tyrosine kinase
TRINITY_DN112661_c0_g1_i1.path1	9.89	7.1	6.44	0.28	0	1.14	36	32	24	1	0	5	0.051	-4.3	1.04158e-07	2.5139e-06	down	Chr00	61288022	61288251	-	TRINITY_DN112661_c0_g1_i1	--	--	--	--	--	--	--	--
TRINITY_DN11267_c0_g1_i8.path1	16.53	15.47	13.39	54.58	41.81	49.56	402	466	333	1311	1265	1451	2.706	1.436	8.46139e-16	7.61619e-14	up	4A	335509630	335511257	-	TRINITY_DN11267_c0_g1_i8	--	--	PREDICTED: uncharacterized protein LOC100828534 [Brachypodium distachyon]	--	SubName: Full=Uncharacterized protein {ECO:0000313|EnsemblPlants:HORVU4Hr1G074770.5};	--	--	--
TRINITY_DN11268_c0_g1_i4.path1	0.85	1.51	0.94	0.39	0.53	0.88	44	97	50	20	34	55	0.458	-1.128	0.00394582	0.0243056	down	6D	290514107	290522319	-	TRINITY_DN11268_c0_g1_i4	--	--	PREDICTED: uncharacterized protein LOC4331121 isoform X3 [Oryza sativa Japonica Group]	--	SubName: Full=Os02g0814600 protein {ECO:0000313|EMBL:BAF10408.1};	--	--	--
TRINITY_DN112684_c0_g1_i1.path1	17.34	16.8	20.34	8.78	5.38	8.23	70	84	84	35	27	40	0.342	-1.548	7.23933e-06	0.000114594	down	4A	230133712	230133966	+	TRINITY_DN112684_c0_g1_i1	--	--	--	--	--	--	--	--
TRINITY_DN11288_c0_g1_i1.path1	5.74	5.95	2.88	12.95	13.7	10.81	74	95	38	165	220	168	2.186	1.128	0.000122652	0.00134224	up	5C	95905309	95906282	+	TRINITY_DN11288_c0_g1_i1	--	--	--	--	--	--	--	--
TRINITY_DN112898_c0_g1_i1.path1	2.2	1.52	0.31	7	4.29	7.05	7	6	1	22	17	27	3.833	1.939	0.00855884	0.0449334	up	7A	238238107	238238307	+	TRINITY_DN112898_c0_g1_i1	--	--	--	--	--	--	--	--
TRINITY_DN112927_c0_g1_i1.path1	0	0.12	0	1.86	1.11	2.93	0	1	0	12	9	23	32.136	5.006	0.000541511	0.00475487	up	4A	375602160	375602571	-	TRINITY_DN112927_c0_g1_i1	--	--	--	--	--	--	--	--
TRINITY_DN112927_c0_g1_i1.path2	0	0.37	0	3.87	2.21	1.78	0	3	0	25	18	14	16.596	4.053	0.000353469	0.00332245	up	3D	369698056	369698468	-	TRINITY_DN112927_c0_g1_i1	--	--	--	--	--	--	--	--
TRINITY_DN112931_c0_g1_i1.path2	6.41	7.67	7.89	0.96	1.15	1.97	27	40	34	4	6	10	0.156	-2.679	2.353e-06	4.21106e-05	down	5D	84368598	84368863	+	TRINITY_DN112931_c0_g1_i1	--	K18823 soyasaponin III rhamnosyltransferase [EC:2.4.1.273] | (RefSeq) soyasaponin III rhamnosyltransferase (A)	UDP-glycosyltransferase 91C1-like [Aegilops tauschii subsp. tauschii]	RecName: Full=UDP-glycosyltransferase 91A1; EC=2.4.1.-;	SubName: Full=Uncharacterized protein {ECO:0000313|EnsemblPlants:HORVU5Hr1G084520.3};	UDP-glucuronosyl and UDP-glucosyl transferase	GO:0043231,intracellular membrane-bounded organelle; GO:0080043,quercetin 3-O-glucosyltransferase activity; GO:0080044,quercetin 7-O-glucosyltransferase activity; GO:0008152,metabolic process	--
TRINITY_DN11297_c0_g1_i1.path1	2.99	3.09	4.41	2.39	1.92	1.81	110	141	166	87	88	80	0.488	-1.035	0.000305649	0.00292839	down	1A	311012213	311018328	-	TRINITY_DN11297_c0_g1_i1	--	K16280 E3 ubiquitin-protein ligase RGLG [EC:2.3.2.27] | (RefSeq) E3 ubiquitin-protein ligase RGLG1-like (A)	protein BONZAI 3-like isoform X2 [Aegilops tauschii subsp. tauschii]	RecName: Full=Protein BONZAI 3;	SubName: Full=Uncharacterized protein {ECO:0000313|EnsemblPlants:TRIAE_CS42_1AL_TGACv1_000719_AA0017770.7};	Copine	GO:0005886,plasma membrane; GO:0005544,calcium-dependent phospholipid binding; GO:0006952,defense response; GO:0060548,negative regulation of cell death; GO:0090332,stomatal closure	Copine
TRINITY_DN11298_c0_g1_i1.path1	11.21	13.46	7.94	55.72	57.18	40.01	80	119	58	393	508	344	3.986	1.995	4.43036e-15	3.65925e-13	up	2A	427076220	427077018	-	TRINITY_DN11298_c0_g1_i1	--	K03129 transcription initiation factor TFIID subunit 4 | (RefSeq) transcription initiation factor TFIID subunit 4b-like (A)	cinnamoyl-CoA reductase 2-like [Aegilops tauschii subsp. tauschii]	--	SubName: Full=Uncharacterized protein {ECO:0000313|EMBL:JAF41368.1};	Flavonol reductase/cinnamoyl-CoA reductase	--	--
TRINITY_DN113_c1_g1_i1.path1	0	0	0.12	2.89	1.5	12.68	0	0	1	23	15	123	112.444	6.813	4.55077e-07	9.58885e-06	up	1C	427156456	427156964	+	TRINITY_DN113_c1_g1_i1	--	K13993 HSP20 family protein | (RefSeq) LOC109738378; 16.9 kDa class I heat shock protein 1-like (A)	17 kDa class I small heat shock protein [Hordeum vulgare subsp. vulgare]	RecName: Full=16.9 kDa class I heat shock protein 1; AltName: Full=HSP 16.9; AltName: Full=Heat shock protein 16.9A; AltName: Full=Heat shock protein 17; AltName: Full=Low molecular weight heat shock protein;	SubName: Full=17 kDa class I small heat shock protein {ECO:0000313|EMBL:CAA69172.1};	Molecular chaperone (small heat-shock protein Hsp26/Hsp42)	GO:0005737,cytoplasm	--
TRINITY_DN1130_c0_g2_i1.path1	3.53	5.9	5.17	14.29	9.1	12.58	58	120	87	232	186	249	2.066	1.047	0.000117434	0.00129307	up	6C	464133078	464134556	+	TRINITY_DN1130_c0_g2_i1	--	--	predicted protein [Hordeum vulgare subsp. vulgare]	--	SubName: Full=Uncharacterized protein {ECO:0000313|EnsemblPlants:TRIAE_CS42_6BS_TGACv1_514964_AA1666240.1};	--	GO:0003676,nucleic acid binding	--
TRINITY_DN113018_c0_g1_i1.path1	7.72	8.01	13.55	4.78	5.44	5.76	49	63	88	30	43	44	0.456	-1.134	0.00219058	0.0151388	down	5A	52226296	52228135	-	TRINITY_DN113018_c0_g1_i1	--	K14432 ABA responsive element binding factor | (RefSeq) ABSCISIC ACID-INSENSITIVE 5-like protein 2 (A)	PREDICTED: ABSCISIC ACID-INSENSITIVE 5-like protein 2 [Brachypodium distachyon]	RecName: Full=ABSCISIC ACID-INSENSITIVE 5-like protein 2; AltName: Full=ABA-responsive element-binding protein 3; AltName: Full=Dc3 promoter-binding factor 3; Short=AtDPBF3; AltName: Full=bZIP transcription factor 66; Short=AtbZIP66;	SubName: Full=Uncharacterized protein {ECO:0000313|EMBL:KQK21905.1};	--	GO:0005634,nucleus; GO:0003700,DNA-binding transcription factor activity; GO:0043565,sequence-specific DNA binding; GO:0009738,abscisic acid-activated signaling pathway; GO:0009737,response to abscisic acid; GO:0006351,transcription, DNA-templated	--
TRINITY_DN113018_c0_g1_i1.path2	12.67	10.48	11.16	4.27	4.65	4.41	81	83	73	27	37	34	0.327	-1.612	1.53533e-06	2.87498e-05	down	5D	21965695	21967529	-	TRINITY_DN113018_c0_g1_i1	--	K14432 ABA responsive element binding factor | (RefSeq) ABSCISIC ACID-INSENSITIVE 5-like protein 2 (A)	predicted protein [Hordeum vulgare subsp. vulgare]	RecName: Full=ABSCISIC ACID-INSENSITIVE 5-like protein 2; AltName: Full=ABA-responsive element-binding protein 3; AltName: Full=Dc3 promoter-binding factor 3; Short=AtDPBF3; AltName: Full=bZIP transcription factor 66; Short=AtbZIP66;	SubName: Full=Predicted protein {ECO:0000313|EMBL:BAJ92629.1};	--	GO:0005634,nucleus; GO:0003700,DNA-binding transcription factor activity; GO:0043565,sequence-specific DNA binding; GO:0009738,abscisic acid-activated signaling pathway; GO:0009737,response to abscisic acid; GO:0006351,transcription, DNA-templated	--
TRINITY_DN113048_c0_g1_i1.path1	9.19	5.81	5.28	2.49	5.18	2.75	97	76	57	26	68	35	0.437	-1.193	0.00194143	0.0137241	down	2C	223554832	223555498	-	TRINITY_DN113048_c0_g1_i1	--	--	--	--	--	--	--	--
TRINITY_DN11306_c0_g1_i2.path1	13.92	12.95	10.7	5.79	6.42	6.28	197	227	155	81	113	107	0.415	-1.269	7.45397e-08	1.84282e-06	down	4D	241683883	241684776	+	TRINITY_DN11306_c0_g1_i2	--	--	--	--	--	--	--	--
TRINITY_DN11309_c0_g1_i1.path2	9.19	8.16	5.16	2.56	2.4	2.86	40	44	23	11	13	15	0.293	-1.772	0.000316723	0.00301947	down	1D	17949569	17950611	+	TRINITY_DN11309_c0_g1_i1	--	--	uncharacterized protein LOC109785474 isoform X3 [Aegilops tauschii subsp. tauschii]	--	SubName: Full=Uncharacterized protein {ECO:0000313|EnsemblPlants:TRIAE_CS42_7AS_TGACv1_570207_AA1832270.1};	--	GO:0003676,nucleic acid binding; GO:0004523,RNA-DNA hybrid ribonuclease activity	--
TRINITY_DN11320_c0_g1_i1.path1	15.38	13.15	11.64	2.29	3.45	2.82	204	216	158	30	57	45	0.18	-2.471	4.4519e-19	5.59768e-17	down	2D	378839802	378840639	-	TRINITY_DN11320_c0_g1_i1	--	K09553 stress-induced-phosphoprotein 1 | (RefSeq) LOC109765882; hsp70-Hsp90 organizing protein (A)	hsp70-Hsp90 organizing protein [Aegilops tauschii subsp. tauschii]	RecName: Full=Hsp70-Hsp90 organizing protein; Short=TaHop;	SubName: Full=Uncharacterized protein {ECO:0000313|EnsemblPlants:TRIAE_CS42_2AL_TGACv1_093757_AA0286160.2};	Molecular co-chaperone STI1	GO:0005737,cytoplasm; GO:0005634,nucleus; GO:0051879,Hsp90 protein binding; GO:0070678,preprotein binding; GO:0051131,chaperone-mediated protein complex assembly	Tetratricopeptide repeat
TRINITY_DN11320_c0_g1_i1.path2	12.06	11.08	8.4	4.5	3.27	3.88	160	182	114	59	54	62	0.31	-1.688	1.01487e-09	3.63125e-08	down	2C	509149101	509149938	+	TRINITY_DN11320_c0_g1_i1	--	K09553 stress-induced-phosphoprotein 1 | (RefSeq) hsp70-Hsp90 organizing protein-like (A)	predicted protein [Hordeum vulgare subsp. vulgare]	RecName: Full=Hsp70-Hsp90 organizing protein; Short=TaHop;	SubName: Full=Uncharacterized protein {ECO:0000313|EnsemblPlants:HORVU2Hr1G092190.1};	Molecular co-chaperone STI1	GO:0005737,cytoplasm; GO:0005634,nucleus; GO:0051879,Hsp90 protein binding; GO:0070678,preprotein binding; GO:0051131,chaperone-mediated protein complex assembly	--
TRINITY_DN113200_c0_g1_i1.path1	10.3	5.91	4.5	3.29	3.38	3.26	76	54	34	24	31	29	0.405	-1.305	0.00160841	0.0117326	down	3C	550246913	550247635	+	TRINITY_DN113200_c0_g1_i1	--	--	--	--	--	--	--	--
TRINITY_DN113237_c0_g1_i1.path1	34.43	68.35	53.71	751.34	551.83	679.74	218	536	348	4700	4348	5183	10.688	3.418	8.16961e-56	1.32854e-52	up	6C	500477829	500478228	+	TRINITY_DN113237_c0_g1_i1	--	--	--	--	--	--	--	--
TRINITY_DN113277_c0_g1_i1.path1	12.59	8.39	12.7	2.83	3.86	5.15	63	52	65	14	24	31	0.294	-1.766	1.27271e-05	0.00018849	down	6D	59548652	59548967	+	TRINITY_DN113277_c0_g1_i1	--	--	--	--	--	--	--	--
TRINITY_DN113290_c0_g1_i1.path1	0	0.16	0.39	2.43	2.25	4.48	0	1	2	12	14	27	13.777	3.784	0.000711188	0.00598551	up	5D	480222973	480223288	+	TRINITY_DN113290_c0_g1_i1	--	K05665 ATP-binding cassette, subfamily C (CFTR/MRP), member 1 | (RAP-DB) Os01g0356400; Similar to multidrug resistance protein ABC transporter family. (A)	PREDICTED: LOW QUALITY PROTEIN: ABC transporter C family member 4 [Brachypodium distachyon]	RecName: Full=ABC transporter C family member 4; Short=ABC transporter ABCC.4; Short=AtABCC4; EC=3.6.3.44; AltName: Full=ATP-energized glutathione S-conjugate pump 4; AltName: Full=Glutathione S-conjugate-transporting ATPase 4; AltName: Full=Multidrug resistance-associated protein 4;	SubName: Full=Uncharacterized protein {ECO:0000313|EnsemblPlants:BRADI2G12727.2};	Multidrug resistance-associated protein/mitoxantrone resistance protein, ABC superfamily	GO:0005794,Golgi apparatus; GO:0016021,integral component of membrane; GO:0000325,plant-type vacuole; GO:0005886,plasma membrane; GO:0009506,plasmodesma; GO:0005774,vacuolar membrane; GO:0005773,vacuole; GO:0005524,ATP binding; GO:0042626,ATPase activity, coupled to transmembrane movement of substances; GO:0008559,xenobiotic transmembrane transporting ATPase activity; GO:0006855,drug transmembran…	--
TRINITY_DN113293_c0_g1_i1.path2	1.61	2.17	2.49	5.29	6.04	6.01	12	20	19	39	56	54	2.324	1.217	0.00541805	0.0313057	up	2A	254744106	254744576	-	TRINITY_DN113293_c0_g1_i1	--	--	predicted protein, partial [Hordeum vulgare subsp. vulgare]	--	SubName: Full=Uncharacterized protein {ECO:0000313|EMBL:KQK21110.1}; Flags: Fragment;	--	--	--
TRINITY_DN113295_c0_g1_i1.path1	18.1	14.12	13.96	8.85	10.29	5.83	147	142	116	71	104	57	0.458	-1.127	0.000158351	0.00167407	down	1D	318969146	318969658	+	TRINITY_DN113295_c0_g1_i1	--	--	--	--	--	--	--	--
TRINITY_DN113296_c0_g1_i1.path1	0.52	0.53	0.13	16.12	11.54	8.67	4	5	1	122	110	80	25.933	4.697	1.87972e-15	1.62212e-13	up	4C	370421599	370422082	+	TRINITY_DN113296_c0_g1_i1	--	--	--	--	--	--	--	--
TRINITY_DN11335_c0_g1_i2.path1	3.73	3.4	3.05	10.34	10.56	10.13	92	104	77	252	324	301	2.569	1.361	1.55383e-09	5.37625e-08	up	3C	260167769	260169785	+	TRINITY_DN11335_c0_g1_i2	--	--	--	--	--	--	--	--
TRINITY_DN113416_c0_g1_i1.path2	1.96	2.07	0.59	3.82	4.49	7.66	13	17	4	25	37	61	2.889	1.531	0.00517543	0.0301587	up	1A	125657368	125657785	-	TRINITY_DN113416_c0_g1_i1	--	K04077 chaperonin GroEL | (RefSeq) chaperonin CPN60-2, mitochondrial-like (A)	Chaperonin CPN60-2, mitochondrial [Gossypium arboreum]	RecName: Full=Chaperonin CPN60-2, mitochondrial; AltName: Full=HSP60-2; Flags: Precursor;	SubName: Full=Chaperonin CPN60-2, mitochondrial {ECO:0000313|EMBL:KHG09712.1};	Mitochondrial chaperonin, Cpn60/Hsp60p	GO:0005739,mitochondrion; GO:0005524,ATP binding; GO:0042026,protein refolding	--
TRINITY_DN113432_c0_g1_i1.path2	3.24	1.44	1.74	0	0	0.27	20	11	11	0	0	2	0.036	-4.79	0.000209397	0.00211942	down	1D	325942426	325942815	+	TRINITY_DN113432_c0_g1_i1	--	--	--	--	--	--	--	--
TRINITY_DN11349_c0_g1_i2.path1	1.62	2.14	2.07	0.63	0.95	1.34	70	115	92	27	51	70	0.419	-1.254	0.000148891	0.00158903	down	4A	414140858	414147491	+	TRINITY_DN11349_c0_g1_i2	--	K13806 sn1-specific diacylglycerol lipase [EC:3.1.1.-] | (RefSeq) LOW QUALITY PROTEIN: uncharacterized protein LOC108198145 (A)	uncharacterized protein LOC109776104 [Aegilops tauschii subsp. tauschii]	--	SubName: Full=Uncharacterized protein {ECO:0000313|EnsemblPlants:HORVU3Hr1G089130.10};	Predicted lipase/calmodulin-binding heat-shock protein	GO:0016787,hydrolase activity; GO:0006629,lipid metabolic process	Lipase (class 3)
TRINITY_DN11351_c0_g1_i7.path1	0.62	0.75	0.79	0.16	0.39	0.6	65	97	85	17	51	76	0.447	-1.161	0.00253104	0.0170269	down	7A	178813226	178819841	-	TRINITY_DN11351_c0_g1_i7	--	K07151 dolichyl-diphosphooligosaccharide---protein glycosyltransferase [EC:2.4.99.18] | (RefSeq) dolichyl-diphosphooligosaccharide--protein glycosyltransferase subunit STT3B isoform X1 (A)	retrotransposon protein, putative, unclassified, expressed [Oryza sativa Japonica Group]	RecName: Full=Retrovirus-related Pol polyprotein from transposon TNT 1-94; Includes: RecName: Full=Protease; EC=3.4.23.-; Includes: RecName: Full=Reverse transcriptase; EC=2.7.7.49; Includes: RecName: Full=Endonuclease;	SubName: Full=Uncharacterized protein {ECO:0000313|EnsemblPlants:TRIAE_CS42_7DS_TGACv1_623132_AA2049870.1};	FOG: Transposon-encoded proteins with TYA, reverse transcriptase, integrase domains in various combinations	GO:0004190,aspartic-type endopeptidase activity; GO:0004519,endonuclease activity; GO:0003676,nucleic acid binding; GO:0003964,RNA-directed DNA polymerase activity; GO:0008270,zinc ion binding; GO:0015074,DNA integration	--
TRINITY_DN11351_c0_g1_i7.path2	0.42	0.46	0.56	0.08	0.2	0.41	44	60	60	8	26	51	0.392	-1.35	0.00374803	0.0233269	down	7D	219215556	219222153	-	TRINITY_DN11351_c0_g1_i7	--	K07739 elongator complex protein 3 [EC:2.3.1.48] | (RefSeq) uncharacterized LOC105803458 (A)	retrotransposon protein, putative, unclassified [Oryza sativa Japonica Group]	RecName: Full=Retrovirus-related Pol polyprotein from transposon RE2; AltName: Full=Retro element 2 {ECO:0000303|PubMed:10689195}; Short=AtRE2 {ECO:0000303|PubMed:10689195}; Includes: RecName: Full=Protease RE2; EC=3.4.23.-; Includes: RecName: Full=Reverse transcriptase RE2; EC=2.7.7.49; Includes: RecName: Full=Endonuclease RE2;	SubName: Full=Uncharacterized protein {ECO:0000313|EnsemblPlants:TRIAE_CS42_6DL_TGACv1_526599_AA1687990.1};	FOG: Transposon-encoded proteins with TYA, reverse transcriptase, integrase domains in various combinations	GO:0004190,aspartic-type endopeptidase activity; GO:0004519,endonuclease activity; GO:0046872,metal ion binding; GO:0003676,nucleic acid binding; GO:0003964,RNA-directed DNA polymerase activity; GO:0015074,DNA integration; GO:0006310,DNA recombination	--
TRINITY_DN113515_c0_g1_i1.path1	21.51	17.73	16.42	5.44	6.66	9.12	96	98	75	24	37	49	0.32	-1.642	6.54161e-07	1.3383e-05	down	4A	195638738	195639019	-	TRINITY_DN113515_c0_g1_i1	--	--	--	--	--	--	--	--
TRINITY_DN113530_c0_g1_i1.path1	4.04	4.66	5.36	16.64	12.52	10.06	14	20	19	57	54	42	2.352	1.234	0.00549821	0.0316514	up	3C	24614189	24614407	-	TRINITY_DN113530_c0_g1_i1	--	--	--	--	--	--	--	--
TRINITY_DN113559_c0_g1_i1.path1	4.49	6.43	4.67	13.93	12.11	12.15	31	55	33	95	104	101	2.061	1.043	0.0010887	0.00851083	up	7C	42629022	42629457	-	TRINITY_DN113559_c0_g1_i1	--	--	--	--	--	--	--	--
TRINITY_DN113568_c0_g1_i1.path1	0.08	0.06	0	1.77	0.73	1.96	1	1	0	23	12	31	26.819	4.745	0.000124176	0.00135791	up	4C	224171444	224172274	-	TRINITY_DN113568_c0_g1_i1	--	--	--	--	--	--	--	--
TRINITY_DN113577_c0_g1_i1.path1	2.73	1.4	2.18	0.25	0.3	0.51	22	14	18	2	3	5	0.142	-2.819	0.000286846	0.00277257	down	7D	132647069	132647578	+	TRINITY_DN113577_c0_g1_i1	--	--	--	--	--	--	--	--
TRINITY_DN113577_c0_g1_i1.path2	2.6	1.2	1.21	0.25	0.5	0.62	21	12	10	2	5	6	0.231	-2.113	0.0078775	0.0421456	down	7A	268404921	268405430	-	TRINITY_DN113577_c0_g1_i1	--	--	--	--	--	--	--	--
TRINITY_DN113604_c0_g1_i1.path4	9.1	9.5	11.64	4.82	4.39	6.28	65	84	85	34	39	54	0.428	-1.225	0.000204818	0.00208075	down	2D	531865028	531865478	+	TRINITY_DN113604_c0_g1_i1	--	--	--	--	--	--	--	--
TRINITY_DN11363_c0_g1_i1.path1	22.47	15.02	13.68	9.32	10.51	4.59	122	101	76	50	71	30	0.406	-1.302	0.000345404	0.003256	down	2C	23941205	23941547	+	TRINITY_DN11363_c0_g1_i1	--	--	--	--	--	--	--	--
TRINITY_DN11365_c0_g1_i1.path1	14.86	15.3	11.26	45.44	47.54	41.29	200	255	155	604	796	669	2.742	1.455	1.11404e-13	7.41128e-12	up	4D	352016426	352017380	-	TRINITY_DN11365_c0_g1_i1	--	--	--	--	--	--	--	--
TRINITY_DN113656_c0_g1_i1.path1	1.72	3.57	1.44	0.5	0	0	7	18	6	2	0	0	0.057	-4.138	0.00236966	0.0161386	down	2D	199047165	199047421	+	TRINITY_DN113656_c0_g1_i1	--	--	--	--	--	--	--	--
TRINITY_DN113675_c0_g1_i1.path1	0.35	0	0.11	1.07	1.32	1.66	3	0	1	9	14	17	7.554	2.917	0.00772057	0.0415154	up	5C	258269316	258269852	-	TRINITY_DN113675_c0_g1_i1	--	--	--	--	--	--	--	--
TRINITY_DN113691_c0_g1_i1.path1	10.99	11.27	17.9	32.2	21.7	53.41	48	61	80	139	118	281	2.204	1.14	0.000708559	0.00596681	up	1A	363850525	363850800	-	TRINITY_DN113691_c0_g1_i1	--	--	--	--	--	--	--	--
TRINITY_DN11370_c0_g1_i1.path1	0.28	0.42	0.34	1.35	1.11	0.87	24	44	30	114	118	89	2.699	1.433	3.16113e-05	0.000418921	up	7A	67693826	67708399	-	TRINITY_DN11370_c0_g1_i1	--	K00703 starch synthase [EC:2.4.1.21] | (RefSeq) starch synthase 3, chloroplastic/amyloplastic (A)	PREDICTED: starch synthase 3, chloroplastic/amyloplastic-like [Brachypodium distachyon]	RecName: Full=Soluble starch synthase 3, chloroplastic/amyloplastic; EC=2.4.1.21; AltName: Full=Soluble starch synthase III; Short=SS III; Flags: Precursor;	SubName: Full=Uncharacterized protein {ECO:0000313|EMBL:KQJ95067.1};	--	GO:0009501,amyloplast; GO:0009507,chloroplast; GO:0033201,alpha-1,4-glucan synthase activity; GO:0004373,glycogen (starch) synthase activity; GO:2001070,starch binding; GO:0009011,starch synthase activity; GO:0019252,starch biosynthetic process	Starch/carbohydrate-binding module (family 53)
TRINITY_DN113710_c0_g1_i1.path1	3	1.73	1.26	0.72	0.57	0.47	21	15	9	5	5	4	0.249	-2.006	0.00853825	0.0448414	down	5C	361839679	361840120	-	TRINITY_DN113710_c0_g1_i1	--	--	--	--	--	--	--	--
TRINITY_DN113731_c0_g1_i1.path1	1.72	3.57	4.32	11.45	8.1	9.59	7	18	18	46	41	47	2.532	1.34	0.00586388	0.0333677	up	2C	525864212	525864543	+	TRINITY_DN113731_c0_g1_i1	--	K14638 solute carrier family 15 (peptide/histidine transporter), member 3/4 | (RefSeq) protein NRT1/ PTR FAMILY 5.10-like (A)	hypothetical protein TRIUR3_04001 [Triticum urartu]	--	SubName: Full=Uncharacterized protein {ECO:0000313|EnsemblPlants:TRIAE_CS42_2BL_TGACv1_129773_AA0395450.2};	--	GO:0016021,integral component of membrane; GO:0022857,transmembrane transporter activity	--
TRINITY_DN113753_c0_g1_i1.path1	2.02	3.27	1.58	7.58	6.51	7.06	10	20	8	37	40	42	2.582	1.368	0.00594213	0.0337111	up	1A	243836552	243837672	-	TRINITY_DN113753_c0_g1_i1	--	--	--	--	--	--	--	--
TRINITY_DN11376_c0_g1_i5.path1	0.84	4.91	4.85	14.4	8.95	13.99	9	65	53	152	119	180	2.941	1.556	0.000223309	0.00224364	up	4A	338759340	338760014	+	TRINITY_DN11376_c0_g1_i5	--	--	--	--	--	--	--	--
TRINITY_DN11377_c0_g2_i2.path1	0.22	0.84	0.75	2.54	2.02	1.63	4	19	14	46	46	36	2.881	1.527	0.00399426	0.0245379	up	1D	283920533	283922854	-	TRINITY_DN11377_c0_g2_i2	--	--	--	--	--	--	--	--
TRINITY_DN113774_c0_g1_i1.path2	5.13	3.41	4.26	2.08	2.27	1.92	40	33	34	16	22	18	0.411	-1.281	0.0051034	0.0298483	down	3A	229687433	229690377	+	TRINITY_DN113774_c0_g1_i1	--	--	--	--	--	--	--	--
TRINITY_DN113777_c0_g1_i1.path1	0.64	0.65	0	9.93	5.3	6.27	4	5	0	61	41	47	13.882	3.795	3.4526e-08	9.11792e-07	up	5D	400285227	400285812	+	TRINITY_DN113777_c0_g1_i1	--	--	PREDICTED: uncharacterized protein LOC100828324 [Brachypodium distachyon]	--	SubName: Full=Uncharacterized protein {ECO:0000313|EMBL:KQJ90732.1, ECO:0000313|EnsemblPlants:BRADI4G33570.1};	--	--	--
TRINITY_DN11383_c0_g1_i1.path1	0.11	0.09	0.21	0.55	0.97	3.09	1	1	2	5	11	34	9.292	3.216	0.00332915	0.0212271	up	5C	19724122	19725349	-	TRINITY_DN11383_c0_g1_i1	--	--	--	--	--	--	--	--
TRINITY_DN113842_c0_g1_i1.path1	5.02	3.34	2.6	1.2	0.47	0.25	17	14	9	4	2	1	0.144	-2.798	0.00218297	0.0150905	down	1A	280306462	280306675	-	TRINITY_DN113842_c0_g1_i1	--	--	--	--	--	--	--	--
TRINITY_DN113855_c0_g1_i1.path2	0.63	0.51	0	4.48	4.57	10.23	2	2	0	14	18	39	13.967	3.804	0.000120629	0.00132307	up	5A	117495596	117500756	-	TRINITY_DN113855_c0_g1_i1	--	K15559 regulator of Ty1 transposition protein 103 | (RefSeq) disease resistance protein RPM1 (A)	putative disease resistance RPP13-like protein 3 [Aegilops tauschii subsp. tauschii]	--	SubName: Full=Uncharacterized protein {ECO:0000313|EnsemblPlants:TRIAE_CS42_6DS_TGACv1_543028_AA1734330.1};	--	GO:0043531,ADP binding	--
TRINITY_DN113857_c0_g1_i1.path1	6.14	4.75	8	11.65	18.7	15.5	24	23	32	45	91	73	2.044	1.031	0.00918722	0.0474763	up	5A	162227628	162227874	+	TRINITY_DN113857_c0_g1_i1	--	--	--	--	--	--	--	--
TRINITY_DN11386_c0_g2_i1.path1	1.29	1.04	1.17	6.15	5.4	4.66	14	14	13	66	73	61	3.92	1.971	4.11941e-06	6.91567e-05	up	6C	316362921	316363675	+	TRINITY_DN11386_c0_g2_i1	--	--	--	--	--	--	--	--
TRINITY_DN113880_c0_g1_i1.path1	4.13	18.35	4.62	29.28	35.58	58.34	14	77	16	98	150	238	3.822	1.934	7.29692e-06	0.000115406	up	5D	433340888	433342264	+	TRINITY_DN113880_c0_g1_i1	--	K24028 salicylic acid 3-hydroxylase [EC:1.14.11.-] | (Kazusa) Lj0g3v0213339.1; - (A)	predicted protein, partial [Hordeum vulgare subsp. vulgare]	RecName: Full=Naringenin,2-oxoglutarate 3-dioxygenase; EC=1.14.11.9 {ECO:0000250|UniProtKB:Q7XZQ7}; AltName: Full=FHT; AltName: Full=Flavanone-3-hydroxylase; Short=F3H;	SubName: Full=Predicted protein {ECO:0000313|EMBL:BAK03230.1}; Flags: Fragment;	Iron/ascorbate family oxidoreductases	GO:0031418,L-ascorbic acid binding; GO:0046872,metal ion binding; GO:0045486,naringenin 3-dioxygenase activity; GO:0009813,flavonoid biosynthetic process	2OG-Fe(II) oxygenase superfamily
TRINITY_DN113880_c0_g1_i1.path2	3.25	7.87	0.58	16.43	26.57	35.79	11	33	2	55	112	146	5.647	2.498	8.40904e-07	1.68087e-05	up	5A	485012251	485013649	+	TRINITY_DN113880_c0_g1_i1	--	K24028 salicylic acid 3-hydroxylase [EC:1.14.11.-] | (RefSeq) 2-oxoacid-dependent dioxygenase (A)	PREDICTED: 2'-deoxymugineic-acid 2'-dioxygenase [Brachypodium distachyon]	RecName: Full=1-aminocyclopropane-1-carboxylate oxidase homolog 11; EC=1.14.-.-;	SubName: Full=Uncharacterized protein {ECO:0000313|EMBL:KQJ91631.1, ECO:0000313|EnsemblPlants:BRADI4G38780.1};	Iron/ascorbate family oxidoreductases	GO:0046872,metal ion binding; GO:0016491,oxidoreductase activity	--
TRINITY_DN113884_c0_g1_i1.path3	9.66	7.13	9.17	3.35	3.77	1.83	35	32	34	12	17	8	0.291	-1.781	0.000538149	0.00473162	down	1A	502961062	502961290	+	TRINITY_DN113884_c0_g1_i1	--	K23222 nuclease HARBI1 [EC:3.1.-.-] | (RefSeq) uncharacterized protein LOC104582707 isoform X1 (A)	PREDICTED: uncharacterized protein LOC104582707 isoform X1 [Brachypodium distachyon]	--	SubName: Full=Uncharacterized protein {ECO:0000313|EnsemblPlants:TRIAE_CS42_3B_TGACv1_221364_AA0738380.2};	--	--	--
TRINITY_DN1139_c0_g1_i1.path1	1.27	4.67	0.9	386.09	183.12	273.48	18	82	13	5410	3232	4671	106.443	6.734	8.34165e-21	1.216e-18	up	1A	326622425	326623320	-	TRINITY_DN1139_c0_g1_i1	--	K06910 uncharacterized protein | (RefSeq) UPF0098 protein CT_736 (A)	PREDICTED: UPF0098 protein CT_736 [Brachypodium distachyon]	--	SubName: Full=Uncharacterized protein {ECO:0000313|EMBL:KQK05813.1, ECO:0000313|EnsemblPlants:BRADI2G22660.1};	--	--	--
TRINITY_DN113914_c0_g1_i1.path1	315.37	199.32	142.7	37.88	53.01	34.45	2486	1946	1151	295	520	327	0.162	-2.628	4.14381e-24	7.81547e-22	down	2D	300308219	300309358	-	TRINITY_DN113914_c0_g1_i1	--	K03231 elongation factor 1-alpha | (RefSeq) elongation factor 1-alpha-like (A)	hypothetical protein CRG98_049168, partial [Punica granatum]	RecName: Full=Elongation factor 1-alpha; Short=EF-1-alpha;	SubName: Full=Uncharacterized protein {ECO:0000313|EMBL:PKI26143.1}; Flags: Fragment;	Translation elongation factor EF-1 alpha/Tu	GO:0005737,cytoplasm; GO:0005622,intracellular; GO:0005525,GTP binding; GO:0003924,GTPase activity; GO:0003746,translation elongation factor activity	--
TRINITY_DN11396_c0_g1_i2.path1	1.31	1.38	1.12	4.45	4.3	5.32	40	52	35	134	163	195	3.097	1.631	4.85792e-09	1.52052e-07	up	2D	427651761	427654719	-	TRINITY_DN11396_c0_g1_i2	--	K09753 cinnamoyl-CoA reductase [EC:1.2.1.44] | (RefSeq) LOC109745831; cinnamoyl-CoA reductase 2-like (A)	cinnamoyl CoA reductase [Lolium perenne]	RecName: Full=Cinnamoyl-CoA reductase 1; Short=AtCCR1; EC=1.2.1.44; AltName: Full=Protein IRREGULAR XYLEM 4;	SubName: Full=CCR7 protein {ECO:0000313|EMBL:AJK93395.1};	Flavonol reductase/cinnamoyl-CoA reductase	GO:0005829,cytosol; GO:0016621,cinnamoyl-CoA reductase activity; GO:0050662,coenzyme binding; GO:0007623,circadian rhythm; GO:0009809,lignin biosynthetic process; GO:0009409,response to cold	NAD dependent epimerase/dehydratase family
TRINITY_DN113974_c0_g1_i1.path1	0.88	0.71	0.86	3.34	2.83	8.41	4	4	4	15	16	46	4.935	2.303	0.00194086	0.0137227	up	2C	454905404	454905690	+	TRINITY_DN113974_c0_g1_i1	--	--	--	--	--	--	--	--
TRINITY_DN113979_c0_g1_i1.path1	1.23	2.29	2.05	16.7	13.26	15.13	10	23	17	134	134	148	6.775	2.76	9.63904e-15	7.61744e-13	up	5D	303550515	303551027	-	TRINITY_DN113979_c0_g1_i1	--	--	uncharacterized protein LOC109760196 [Aegilops tauschii subsp. tauschii]	--	SubName: Full=Uncharacterized protein {ECO:0000313|EnsemblPlants:TRIAE_CS42_5AL_TGACv1_374250_AA1195220.1};	--	--	--
TRINITY_DN113988_c0_g1_i1.path2	4.89	1.98	4.78	0.23	1.79	1.29	22	11	22	1	10	7	0.241	-2.051	0.0060441	0.034173	down	5A	468076950	468077233	+	TRINITY_DN113988_c0_g1_i1	--	--	--	--	--	--	--	--
TRINITY_DN11401_c0_g1_i6.path1	4.35	4.26	3.18	0.94	1.46	1.89	103	125	77	22	43	54	0.307	-1.703	1.97207e-07	4.50278e-06	down	6A	39615580	39617076	+	TRINITY_DN11401_c0_g1_i6	--	--	--	--	--	--	--	--
TRINITY_DN114023_c0_g1_i1.path1	8.67	7	10.69	0.42	0.17	0.34	42	42	53	2	1	2	0.029	-5.126	5.73545e-11	2.50576e-09	down	6C	481218245	481219891	+	TRINITY_DN114023_c0_g1_i1	--	--	--	--	--	--	--	--
TRINITY_DN114040_c0_g1_i1.path1	16.39	18.53	7.05	33.63	30.57	35.4	75	105	33	152	174	195	2.008	1.006	0.00100835	0.00799201	up	3D	443728872	443729160	+	TRINITY_DN114040_c0_g1_i1	--	--	--	--	--	--	--	--
TRINITY_DN114058_c0_g1_i1.path2	9.35	14.73	11.37	31.86	24.92	27.65	41	80	51	138	136	146	2.002	1.001	0.000504481	0.00447933	up	6A	294138022	294138298	+	TRINITY_DN114058_c0_g1_i1	--	--	--	--	--	--	--	--
TRINITY_DN11411_c0_g1_i1.path2	147.38	123.65	111.18	42.29	43.01	47.4	4064	4223	3137	1152	1476	1574	0.292	-1.778	2.61772e-28	6.94065e-26	down	1A	8458360	8461985	+	TRINITY_DN11411_c0_g1_i1	--	K15283 solute carrier family 35, member E1 | (RefSeq) phosphoenolpyruvate/phosphate translocator 3, chloroplastic-like (A)	PREDICTED: phosphoenolpyruvate/phosphate translocator 3, chloroplastic-like [Brachypodium distachyon]	RecName: Full=Phosphoenolpyruvate/phosphate translocator 3, chloroplastic; Short=OsPPT3; Flags: Precursor;	SubName: Full=Uncharacterized protein {ECO:0000313|EnsemblPlants:TRIAE_CS42_1AS_TGACv1_019260_AA0064030.1};	Glucose-6-phosphate/phosphate and phosphoenolpyruvate/phosphate antiporter	GO:0031969,chloroplast membrane; GO:0016021,integral component of membrane; GO:0015121,phosphoenolpyruvate:phosphate antiporter activity; GO:0071917,triose-phosphate transmembrane transporter activity; GO:0008643,carbohydrate transport; GO:0015714,phosphoenolpyruvate transport; GO:0035436,triose phosphate transmembrane transport	Triose-phosphate Transporter family
TRINITY_DN114188_c0_g1_i1.path1	10.73	9.45	11.92	33.82	26.07	17.62	44	48	50	137	133	87	2.041	1.029	0.00232784	0.0159054	up	7C	641293682	641294256	+	TRINITY_DN114188_c0_g1_i1	--	--	--	--	--	--	--	--
TRINITY_DN114240_c0_g1_i1.path1	4.57	4.15	6.32	21.38	17.43	20.54	24	27	34	111	114	130	3.312	1.728	2.30836e-07	5.18807e-06	up	2C	522389965	522390296	-	TRINITY_DN114240_c0_g1_i1	--	--	--	--	--	--	--	--
TRINITY_DN114263_c0_g1_i1.path1	0.94	0.65	0.26	5.02	2.91	3.23	7	6	2	37	27	29	5.105	2.352	0.000345992	0.00325986	up	6C	378310196	378310666	+	TRINITY_DN114263_c0_g1_i1	--	--	--	--	--	--	--	--
TRINITY_DN114275_c0_g1_i1.path1	0.3	1.92	3.48	45.33	36.7	34.48	1	8	12	151	154	140	17.162	4.101	3.00278e-19	3.82823e-17	up	3D	80268388	80268600	-	TRINITY_DN114275_c0_g1_i1	--	--	predicted protein [Hordeum vulgare subsp. vulgare]	--	SubName: Full=Uncharacterized protein {ECO:0000313|EnsemblPlants:TRIAE_CS42_3DS_TGACv1_272088_AA0914410.1};	--	GO:0009055,electron transfer activity	Plastocyanin-like domain
TRINITY_DN114275_c0_g1_i1.path2	1.19	1.2	4.64	27.02	17.16	17.98	4	5	16	90	72	73	7.464	2.9	2.09156e-08	5.75841e-07	up	3A	303931763	303931975	+	TRINITY_DN114275_c0_g1_i1	--	--	predicted protein [Hordeum vulgare subsp. vulgare]	--	SubName: Full=Uncharacterized protein {ECO:0000313|EnsemblPlants:TRIAE_CS42_3DS_TGACv1_272088_AA0914410.1};	--	GO:0009055,electron transfer activity	Plastocyanin-like domain
TRINITY_DN11429_c0_g1_i2.path1	8.02	8.79	7.95	4.04	4.2	3.5	221	300	224	110	144	116	0.4	-1.322	2.7237e-09	9.03525e-08	down	1A	379791791	379797790	+	TRINITY_DN11429_c0_g1_i2	--	K09753 cinnamoyl-CoA reductase [EC:1.2.1.44] | (RefSeq) cinnamoyl-CoA reductase 1-like isoform X1 (A)	PREDICTED: cinnamoyl-CoA reductase 2-like [Brachypodium distachyon]	RecName: Full=Cinnamoyl-CoA reductase-like SNL6 {ECO:0000305}; EC=1.2.-.- {ECO:0000305}; AltName: Full=Protein SUPPRESSOR OF NH1-MEDIATED LESION 6 {ECO:0000303|PubMed:20862311};	SubName: Full=Uncharacterized protein {ECO:0000313|EMBL:KQK04642.1, ECO:0000313|EnsemblPlants:BRADI2G14870.1};	Flavonol reductase/cinnamoyl-CoA reductase	GO:0003854,3-beta-hydroxy-delta5-steroid dehydrogenase activity; GO:0042742,defense response to bacterium; GO:0009809,lignin biosynthetic process; GO:0006694,steroid biosynthetic process	3-beta hydroxysteroid dehydrogenase/isomerase family
TRINITY_DN11435_c0_g1_i6.path1	0.95	1.87	1.72	4.17	4.08	4.04	19	46	35	82	101	97	2.273	1.185	0.000660087	0.0056155	up	1D	445804960	445807192	-	TRINITY_DN11435_c0_g1_i6	--	--	PREDICTED: uncharacterized protein LOC100829035 [Brachypodium distachyon]	--	SubName: Full=Uncharacterized protein {ECO:0000313|EMBL:KQK23073.1, ECO:0000313|EnsemblPlants:BRADI1G71110.1};	--	GO:0016021,integral component of membrane	--
TRINITY_DN114358_c0_g1_i1.path2	0	0	0.24	2.94	0.97	3.22	0	0	1	12	5	16	24.612	4.621	0.00233862	0.0159659	up	7D	46384064	46384324	+	TRINITY_DN114358_c0_g1_i1	--	--	--	--	--	--	--	--
TRINITY_DN114359_c0_g1_i1.path1	0.44	0.18	0.22	1.57	3.56	3.5	2	1	1	7	20	19	8.812	3.14	0.002964	0.0193559	up	7A	35339227	35339511	+	TRINITY_DN114359_c0_g1_i1	--	--	--	--	--	--	--	--
TRINITY_DN114412_c0_g1_i1.path1	2.29	1.68	2.45	0	0	0.35	11	10	12	0	0	2	0.046	-4.436	0.000892241	0.00723712	down	2A	409018057	409018359	-	TRINITY_DN114412_c0_g1_i1	--	--	--	--	--	--	--	--
TRINITY_DN11442_c0_g2_i1.path1	1.37	1.24	1.99	0.8	0.8	0.9	33	37	49	19	24	26	0.453	-1.141	0.00872872	0.0456419	down	3C	32066682	32171603	+	TRINITY_DN11442_c0_g2_i1	--	--	--	--	--	--	--	--
TRINITY_DN11443_c0_g1_i7.path1	2.98	3.31	2.91	1.38	1.62	2.41	87	120	87	40	59	85	0.494	-1.018	0.000680342	0.00575969	down	2D	20257000	20258846	+	TRINITY_DN11443_c0_g1_i7	--	--	--	--	--	--	--	--
TRINITY_DN114446_c0_g1_i1.path1	90.34	118.52	107.08	15.45	15.21	27.12	296	481	359	50	62	107	0.153	-2.709	3.47219e-28	8.97849e-26	down	3D	304369263	304369469	+	TRINITY_DN114446_c0_g1_i1	--	--	--	--	--	--	--	--
TRINITY_DN11445_c0_g2_i1.path1	2.95	2.18	2.64	0.25	0.59	0.41	12	11	11	1	3	2	0.137	-2.864	0.00300125	0.0195504	down	4D	384263014	384263270	+	TRINITY_DN11445_c0_g2_i1	--	--	--	--	--	--	--	--
TRINITY_DN114481_c0_g1_i1.path1	3.36	2.11	1.1	5.86	5.71	11.95	18	14	6	31	38	77	2.995	1.583	0.00236496	0.0161171	up	2C	505646871	505647208	+	TRINITY_DN114481_c0_g1_i1	--	--	--	--	--	--	--	--
TRINITY_DN114496_c0_g1_i1.path1	0.29	0.35	0.28	3.48	1.5	6.3	2	3	2	24	13	53	10.174	3.347	5.27587e-05	0.000652278	up	2A	356080348	356080788	+	TRINITY_DN114496_c0_g1_i1	--	K00279 cytokinin dehydrogenase [EC:1.5.99.12] | (RefSeq) LOC109759953; cytokinin dehydrogenase 8-like (A)	cytokinin dehydrogenase 8-like [Aegilops tauschii subsp. tauschii]	RecName: Full=Cytokinin dehydrogenase 8; EC=1.5.99.12; AltName: Full=Cytokinin oxidase 8; Short=OsCKX8; Flags: Precursor;	SubName: Full=Uncharacterized protein {ECO:0000313|EnsemblPlants:TRIAE_CS42_2BL_TGACv1_129330_AA0378950.1};	Proteins containing the FAD binding domain	GO:0005615,extracellular space; GO:0019139,cytokinin dehydrogenase activity; GO:0050660,flavin adenine dinucleotide binding; GO:0016614,oxidoreductase activity, acting on CH-OH group of donors; GO:0009690,cytokinin metabolic process	--
TRINITY_DN114496_c0_g1_i1.path2	2.04	4.01	2.71	10.93	5.16	9.33	14	34	19	74	44	77	2.425	1.278	0.00292681	0.0191593	up	2D	382776838	382777270	-	TRINITY_DN114496_c0_g1_i1	--	K00279 cytokinin dehydrogenase [EC:1.5.99.12] | (RefSeq) LOC109759953; cytokinin dehydrogenase 8-like (A)	cytokinin dehydrogenase 8-like [Aegilops tauschii subsp. tauschii]	RecName: Full=Cytokinin dehydrogenase 8; EC=1.5.99.12; AltName: Full=Cytokinin oxidase 8; Short=OsCKX8; Flags: Precursor;	SubName: Full=Uncharacterized protein {ECO:0000313|EnsemblPlants:TRIAE_CS42_2BL_TGACv1_129330_AA0378950.1};	Proteins containing the FAD binding domain	GO:0005615,extracellular space; GO:0019139,cytokinin dehydrogenase activity; GO:0050660,flavin adenine dinucleotide binding; GO:0016614,oxidoreductase activity, acting on CH-OH group of donors; GO:0009690,cytokinin metabolic process	--
TRINITY_DN11450_c0_g1_i1.path1	0.49	1.28	1.37	4.62	2.55	4.5	8	26	23	75	52	89	3.096	1.63	0.00022793	0.00228395	up	2C	506936556	506937592	+	TRINITY_DN11450_c0_g1_i1	--	K04733 interleukin-1 receptor-associated kinase 4 [EC:2.7.11.1] | (RefSeq) L-type lectin-domain containing receptor kinase IV.2-like (A)	PREDICTED: L-type lectin-domain containing receptor kinase IV.1-like [Brachypodium distachyon]	RecName: Full=L-type lectin-domain containing receptor kinase IV.1; Short=Arabidopsis thaliana lectin-receptor kinase e; Short=AthlecRK-e; Short=LecRK-IV.1; EC=2.7.11.1; AltName: Full=Lectin Receptor Kinase 1; Flags: Precursor;	SubName: Full=Uncharacterized protein {ECO:0000313|EnsemblPlants:TRIAE_CS42_2BL_TGACv1_130737_AA0417080.1};	--	GO:0016021,integral component of membrane; GO:0005886,plasma membrane; GO:0005524,ATP binding; GO:0030246,carbohydrate binding; GO:0004674,protein serine/threonine kinase activity; GO:0009751,response to salicylic acid	--
TRINITY_DN11450_c3_g1_i1.path1	0	0.5	0.73	6.05	2	18.62	0	5	6	48	20	180	17.42	4.123	0.00124016	0.00948696	up	4A	347464403	347465032	+	TRINITY_DN11450_c3_g1_i1	--	K04733 interleukin-1 receptor-associated kinase 4 [EC:2.7.11.1] | (RefSeq) LOC109750862; L-type lectin-domain containing receptor kinase IX.1-like (A)	L-type lectin-domain containing receptor kinase IX.1 [Triticum urartu]	RecName: Full=L-type lectin-domain containing receptor kinase IX.1 {ECO:0000303|PubMed:19773388}; Short=LecRK-IX.1 {ECO:0000303|PubMed:19773388}; EC=2.7.11.1 {ECO:0000255|PROSITE-ProRule:PRU00159}; Flags: Precursor;	SubName: Full=Uncharacterized protein {ECO:0000313|EnsemblPlants:TRIAE_CS42_1AL_TGACv1_002501_AA0042520.2};	--	GO:0016021,integral component of membrane; GO:0005886,plasma membrane; GO:0005524,ATP binding; GO:0030246,carbohydrate binding; GO:0004674,protein serine/threonine kinase activity; GO:0002229,defense response to oomycetes; GO:0010942,positive regulation of cell death; GO:0010726,positive regulation of hydrogen peroxide metabolic process	Protein kinase domain
TRINITY_DN114505_c0_g1_i1.path1	15.2	12.66	7.31	3.25	4.77	7.49	128	132	63	27	50	76	0.371	-1.431	5.04533e-05	0.000628125	down	1C	54420756	54421287	-	TRINITY_DN114505_c0_g1_i1	--	--	--	--	--	--	--	--
TRINITY_DN114518_c0_g1_i1.path1	1.4	0.9	1.64	0.66	0.22	0.23	15	12	18	7	3	3	0.233	-2.104	0.0070998	0.0388424	down	5A	450931562	450932238	-	TRINITY_DN114518_c0_g1_i1	--	--	--	--	--	--	--	--
TRINITY_DN11453_c1_g3_i1.path1	3.68	2.28	2.64	1.92	1.43	1.48	60	46	44	31	29	29	0.471	-1.085	0.00633903	0.0355113	down	3C	161922637	161924480	+	TRINITY_DN11453_c1_g3_i1	--	--	--	--	--	--	--	--
TRINITY_DN11453_c1_g3_i1.path2	6.64	6.1	6.25	4.23	3.56	2.7	108	123	104	68	72	53	0.465	-1.104	0.000182017	0.00188693	down	5C	146047020	146048821	+	TRINITY_DN11453_c1_g3_i1	--	--	--	--	--	--	--	--
TRINITY_DN11459_c0_g1_i5.path3	7.57	7.01	5.47	3.05	3.96	3.9	226	259	167	90	147	140	0.459	-1.123	1.56726e-06	2.92727e-05	down	4A	240298163	240303227	-	TRINITY_DN11459_c0_g1_i5	--	K18998 RNA polymerase II C-terminal domain phosphatase-like 1/2 [EC:3.1.3.16] | (RefSeq) LOC109758503; RNA polymerase II C-terminal domain phosphatase-like 1 (A)	RNA polymerase II C-terminal domain phosphatase-like 1 [Triticum urartu]	--	SubName: Full=Uncharacterized protein {ECO:0000313|EnsemblPlants:TRIAE_CS42_6BL_TGACv1_501087_AA1613340.2};	--	GO:0016021,integral component of membrane; GO:0003723,RNA binding	--
TRINITY_DN114600_c0_g1_i1.path2	16.34	25.38	21.19	3.5	8.84	10.7	52	100	69	11	35	41	0.309	-1.694	2.17936e-05	0.00030401	down	6A	343701399	343701751	-	TRINITY_DN114600_c0_g1_i1	--	--	--	--	--	--	--	--
TRINITY_DN114612_c0_g1_i1.path1	2.32	3.07	2.26	5.52	5.05	11.54	14	23	14	33	38	84	2.401	1.263	0.0071925	0.0392615	up	3C	55653443	55653824	+	TRINITY_DN114612_c0_g1_i1	--	--	--	--	--	--	--	--
TRINITY_DN114614_c0_g1_i1.path1	1.73	1.16	1.41	9.34	9.97	8.62	6	5	5	32	43	36	5.511	2.462	3.71489e-05	0.000481154	up	5D	414303236	414305421	+	TRINITY_DN114614_c0_g1_i1	--	--	--	--	--	--	--	--
TRINITY_DN11462_c0_g1_i4.path1	6.71	4.84	3.93	2.62	2.76	3.17	197	176	118	76	101	112	0.465	-1.105	3.46058e-05	0.000453189	down	6A	39616899	39618844	+	TRINITY_DN11462_c0_g1_i4	--	--	--	--	--	--	--	--
TRINITY_DN11465_c0_g1_i5.path1	5.83	4.52	5.68	3.09	2.99	2.99	254	244	253	133	162	157	0.474	-1.076	2.14334e-06	3.868e-05	down	7D	387516998	387525164	-	TRINITY_DN11465_c0_g1_i5	--	K05391 cyclic nucleotide gated channel, plant | (RefSeq) LOC109762232; cyclic nucleotide-gated ion channel 1-like isoform X1 (A)	cyclic nucleotide-gated ion channel 1-like isoform X2 [Aegilops tauschii subsp. tauschii]	RecName: Full=Cyclic nucleotide-gated ion channel 1; Short=AtCNGC1; AltName: Full=Cyclic nucleotide- and calmodulin-regulated ion channel 1;	SubName: Full=Uncharacterized protein {ECO:0000313|EnsemblPlants:TRIAE_CS42_7AL_TGACv1_556032_AA1753160.4};	K+-channel ERG and related proteins, contain PAS/PAC sensor domain	GO:0005887,integral component of plasma membrane; GO:0005886,plasma membrane; GO:0005516,calmodulin binding; GO:0030552,cAMP binding; GO:0030553,cGMP binding; GO:0005216,ion channel activity; GO:0042391,regulation of membrane potential	Ion transport protein
TRINITY_DN114662_c0_g1_i1.path2	4.43	4.67	3.99	10.34	8.21	12.87	26	34	24	60	60	91	2.008	1.005	0.00614141	0.0346055	up	1D	212955136	212955506	+	TRINITY_DN114662_c0_g1_i1	--	--	--	--	--	--	--	--
TRINITY_DN11477_c0_g1_i7.path2	13.34	16.12	13	37.92	36.89	28.65	302	452	301	848	1039	781	2.065	1.046	1.01976e-07	2.46612e-06	up	3D	44364593	44366556	-	TRINITY_DN11477_c0_g1_i7	--	--	--	--	--	--	--	--
TRINITY_DN1148_c3_g1_i1.path1	47.6	47.45	40.78	139.78	97.52	136.15	162	200	142	470	413	558	2.308	1.207	9.16689e-09	2.70931e-07	up	6C	435978256	435978470	-	TRINITY_DN1148_c3_g1_i1	--	--	--	--	--	--	--	--
TRINITY_DN11484_c3_g1_i1.path1	2.47	1.73	2.1	0.92	0.69	1.43	46	40	40	17	16	32	0.402	-1.316	0.00286715	0.0188277	down	7D	96961879	96963054	+	TRINITY_DN11484_c3_g1_i1	--	--	--	--	--	--	--	--
TRINITY_DN114885_c0_g1_i1.path1	13.5	9.05	7.72	1.29	1.64	5.71	53	44	31	5	8	27	0.238	-2.072	0.000126658	0.0013803	down	2A	5056620	5056867	+	TRINITY_DN114885_c0_g1_i1	--	--	--	--	--	--	--	--
TRINITY_DN114901_c0_g1_i1.path2	5.34	4.46	3.24	1.12	1.18	2.75	29	30	18	6	8	18	0.325	-1.622	0.00499038	0.0293515	down	7C	699839731	699840073	+	TRINITY_DN114901_c0_g1_i1	--	--	--	--	--	--	--	--
TRINITY_DN114964_c0_g1_i1.path1	30.13	33.63	30.82	9.26	12.8	23.15	280	387	293	85	148	259	0.398	-1.33	6.15611e-07	1.26438e-05	down	7C	139823549	139825250	-	TRINITY_DN114964_c0_g1_i1	--	K00951 GTP pyrophosphokinase [EC:2.7.6.5] | (RefSeq) LOC109740650; putative GTP diphosphokinase RSH1, chloroplastic (A)	putative GTP diphosphokinase RSH1, chloroplastic [Aegilops tauschii subsp. tauschii]	RecName: Full=Putative GTP diphosphokinase RSH1, chloroplastic; EC=2.7.6.5; AltName: Full=RelA/SpoT homolog 1; Short=Os-RelA1; Short=OsRSH1; AltName: Full=ppGpp synthetase RSH1; Flags: Precursor;	SubName: Full=Uncharacterized protein {ECO:0000313|EnsemblPlants:TRIAE_CS42_4DL_TGACv1_342462_AA1114150.2};	--	GO:0009507,chloroplast; GO:0005524,ATP binding; GO:0005525,GTP binding; GO:0008728,GTP diphosphokinase activity; GO:0016301,kinase activity; GO:0015969,guanosine tetraphosphate metabolic process	--
TRINITY_DN114964_c0_g1_i1.path3	41.55	51.43	45.27	13.95	17.29	34.68	392	601	437	130	203	394	0.396	-1.337	3.59235e-07	7.7433e-06	down	5D	33591803	33593429	+	TRINITY_DN114964_c0_g1_i1	--	K00951 GTP pyrophosphokinase [EC:2.7.6.5] | (RefSeq) LOC109740650; putative GTP diphosphokinase RSH1, chloroplastic (A)	putative GTP diphosphokinase RSH1, chloroplastic [Aegilops tauschii subsp. tauschii]	RecName: Full=Putative GTP diphosphokinase RSH1, chloroplastic; EC=2.7.6.5; AltName: Full=RelA/SpoT homolog 1; Short=Os-RelA1; Short=OsRSH1; AltName: Full=ppGpp synthetase RSH1; Flags: Precursor;	SubName: Full=Uncharacterized protein {ECO:0000313|EnsemblPlants:HORVU4Hr1G047070.8};	--	GO:0009507,chloroplast; GO:0005524,ATP binding; GO:0005525,GTP binding; GO:0008728,GTP diphosphokinase activity; GO:0016301,kinase activity; GO:0015969,guanosine tetraphosphate metabolic process	--
TRINITY_DN11497_c0_g1_i1.path1	8.21	9.71	8.43	36.1	31.31	28.84	157	230	165	682	745	664	3.083	1.624	1.92516e-16	1.85859e-14	up	2D	491089431	491090638	-	TRINITY_DN11497_c0_g1_i1	--	K08066 nuclear transcription factor Y, gamma | (RefSeq) nuclear transcription factor Y subunit C-9-like (A)	Nuclear transcription factor Y subunit C-2 [Dichanthelium oligosanthes]	RecName: Full=Nuclear transcription factor Y subunit C-6 {ECO:0000305}; Short=OsNF-YC6 {ECO:0000303|PubMed:26542958}; AltName: Full=Transcriptional activator HAP5D {ECO:0000305}; Short=OsHAP5D {ECO:0000303|PubMed:18193457};	SubName: Full=Uncharacterized protein {ECO:0000313|EnsemblPlants:HORVU7Hr1G048760.6};	CCAAT-binding factor, subunit C (HAP5)	GO:0005737,cytoplasm; GO:0005634,nucleus; GO:0003677,DNA binding; GO:0046982,protein heterodimerization activity; GO:0006355,regulation of transcription, DNA-templated; GO:0006351,transcription, DNA-templated	Histone-like transcription factor (CBF/NF-Y) and archaeal histone
TRINITY_DN114993_c0_g1_i1.path3	3.56	1.91	3.31	9.94	7.49	8.3	21	14	20	58	55	59	2.467	1.303	0.00251198	0.0169205	up	2C	456931221	456935548	-	TRINITY_DN114993_c0_g1_i1	--	--	--	--	--	--	--	--
TRINITY_DN11501_c0_g2_i1.path2	2.7	4.36	3.21	10.5	10.17	12.05	32	64	39	123	150	172	2.67	1.417	1.04979e-06	2.04867e-05	up	7D	392601014	392613110	-	TRINITY_DN11501_c0_g2_i1	--	K14209 solute carrier family 36 (proton-coupled amino acid transporter) | (RefSeq) probable amino acid permease 7 (A)	PREDICTED: amino acid permease 3-like [Brachypodium distachyon]	RecName: Full=Amino acid permease 5; AltName: Full=Amino acid transporter AAP5;	SubName: Full=Uncharacterized protein {ECO:0000313|EnsemblPlants:LPERR06G15120.1};	Amino acid transporters	GO:0016021,integral component of membrane; GO:0005886,plasma membrane; GO:0015171,amino acid transmembrane transporter activity; GO:0015174,basic amino acid transmembrane transporter activity; GO:0015293,symporter activity; GO:0015809,arginine transport; GO:0015802,basic amino acid transport	--
TRINITY_DN11501_c0_g2_i1.path3	5.77	4.24	4.54	18.64	15.63	14.15	67	61	54	214	226	198	2.811	1.491	3.77062e-08	9.87936e-07	up	7A	4375355	4376088	+	TRINITY_DN11501_c0_g2_i1	--	K14209 solute carrier family 36 (proton-coupled amino acid transporter) | (RefSeq) amino acid permease 4-like (A)	predicted protein [Hordeum vulgare subsp. vulgare]	RecName: Full=Amino acid permease 2; AltName: Full=Amino acid transporter AAP2;	SubName: Full=Uncharacterized protein {ECO:0000313|EnsemblPlants:LPERR06G15120.1};	Amino acid transporters	GO:0005887,integral component of plasma membrane; GO:0015293,symporter activity; GO:0015800,acidic amino acid transport; GO:0015804,neutral amino acid transport	--
TRINITY_DN115099_c0_g1_i1.path1	2.56	0.79	0.77	7.77	6.8	7.84	13	5	4	39	43	48	4.634	2.212	9.88311e-05	0.00111749	up	1A	484551881	484552201	+	TRINITY_DN115099_c0_g1_i1	--	--	--	--	--	--	--	--
TRINITY_DN1151_c1_g1_i3.path3	0.71	0.41	0.46	1.44	1.01	2.23	18	13	12	36	32	68	2.463	1.3	0.00825663	0.0436852	up	Chr00	48141239	48144816	+	TRINITY_DN1151_c1_g1_i3	--	K14486 auxin response factor | (RefSeq) auxin response factor 19-like (A)	PREDICTED: auxin response factor 12 isoform X2 [Brachypodium distachyon]	RecName: Full=Auxin response factor 12; AltName: Full=OsARF8;	RecName: Full=Auxin response factor {ECO:0000256|RuleBase:RU004561};	--	GO:0005634,nucleus; GO:0043565,sequence-specific DNA binding; GO:0009734,auxin-activated signaling pathway; GO:0009908,flower development; GO:0006355,regulation of transcription, DNA-templated; GO:0006351,transcription, DNA-templated	Auxin response factor
TRINITY_DN115139_c0_g1_i1.path1	12.5	14.68	11.1	4.83	5.48	6.79	55	80	50	21	30	36	0.376	-1.41	0.000105768	0.00118114	down	6C	484809569	484809846	-	TRINITY_DN115139_c0_g1_i1	--	--	hypothetical protein OsJ_23350 [Oryza sativa Japonica Group]	--	SubName: Full=Uncharacterized protein {ECO:0000313|EnsemblPlants:TRIAE_CS42_5BS_TGACv1_423297_AA1373690.1};	--	--	--
TRINITY_DN115153_c0_g1_i1.path1	6.39	2.68	4.75	1.81	0.62	2.34	25	13	19	7	3	11	0.284	-1.816	0.00867615	0.0454108	down	1A	177954645	177956213	-	TRINITY_DN115153_c0_g1_i1	--	--	--	--	--	--	--	--
TRINITY_DN11516_c1_g2_i3.path1	1.7	2.37	2.41	0.94	0.33	0.85	33	57	48	18	8	20	0.271	-1.884	6.78079e-05	0.00080803	down	6A	106834236	106835685	+	TRINITY_DN11516_c1_g2_i3	--	--	--	--	--	--	--	--
TRINITY_DN115177_c0_g1_i1.path1	5.95	5.26	4.98	22.37	12.98	14.59	21	23	18	78	57	62	2.596	1.377	0.000790466	0.00653917	up	2C	381721071	381721293	+	TRINITY_DN115177_c0_g1_i1	--	--	--	--	--	--	--	--
TRINITY_DN115187_c0_g1_i1.path1	5.93	8.47	12.48	31.16	33.17	28.98	26	46	56	135	181	153	2.913	1.543	1.27527e-06	2.43537e-05	up	4C	90381325	90381601	-	TRINITY_DN115187_c0_g1_i1	--	--	--	--	--	--	--	--
TRINITY_DN11519_c2_g1_i4.path1	5.29	4.72	3.75	11.04	11.43	10.2	134	148	97	276	360	311	2.006	1.004	7.0012e-06	0.000111209	up	6A	298179635	298181233	-	TRINITY_DN11519_c2_g1_i4	--	--	predicted protein [Hordeum vulgare subsp. vulgare]	--	SubName: Full=Predicted protein {ECO:0000313|EMBL:BAJ94406.1, ECO:0000313|EnsemblPlants:HORVU6Hr1G050140.1};	--	--	--
TRINITY_DN115190_c0_g1_i1.path1	80.92	62.36	80.56	21.02	27.64	37.19	374	357	381	96	159	207	0.319	-1.646	5.34931e-12	2.78419e-10	down	2D	349824621	349825001	-	TRINITY_DN115190_c0_g1_i1	--	--	acyltransferase-like protein At1g54570, chloroplastic isoform X2 [Aegilops tauschii subsp. tauschii]	RecName: Full=Acyltransferase-like protein At1g54570, chloroplastic; EC=2.3.1.-; Flags: Precursor;	SubName: Full=Uncharacterized protein {ECO:0000313|EnsemblPlants:HORVU6Hr1G018050.50};	--	GO:0009507,chloroplast; GO:0010287,plastoglobule; GO:0004144,diacylglycerol O-acyltransferase activity; GO:0033306,phytol metabolic process; GO:0019432,triglyceride biosynthetic process	--
TRINITY_DN11525_c0_g1_i21.path1	14.21	10.66	8.24	6.12	6.81	5.2	595	553	353	253	355	262	0.463	-1.11	1.4273e-06	2.69474e-05	down	7C	29003810	29006667	-	TRINITY_DN11525_c0_g1_i21	--	--	--	--	--	--	--	--
TRINITY_DN115327_c0_g1_i1.path1	0.66	1.06	1.5	5.53	3.34	4.72	3	6	7	25	19	26	3.535	1.822	0.00743726	0.0402791	up	5C	523459789	523460077	-	TRINITY_DN115327_c0_g1_i1	--	--	--	--	--	--	--	--
TRINITY_DN115356_c0_g1_i1.path2	18.58	7.77	16.66	5.53	7.03	7.26	85	44	78	25	40	40	0.385	-1.378	0.00056499	0.0049297	down	2D	364371614	364371902	+	TRINITY_DN115356_c0_g1_i1	--	--	--	--	--	--	--	--
TRINITY_DN11538_c0_g2_i1.path1	3.47	3.5	0.99	0	0.7	1.32	24	30	7	0	6	11	0.217	-2.206	0.00590354	0.033539	down	3C	41884240	41884888	+	TRINITY_DN11538_c0_g2_i1	--	K15283 solute carrier family 35, member E1 | (RefSeq) LOC109756745; phosphoenolpyruvate/phosphate translocator 3, chloroplastic-like (A)	hypothetical protein BRADI_2g04447v3 [Brachypodium distachyon]	RecName: Full=Phosphoenolpyruvate/phosphate translocator 3, chloroplastic; Short=OsPPT3; Flags: Precursor;	SubName: Full=Uncharacterized protein {ECO:0000313|EnsemblPlants:HORVU3Hr1G024590.13};	Glucose-6-phosphate/phosphate and phosphoenolpyruvate/phosphate antiporter	GO:0031969,chloroplast membrane; GO:0016021,integral component of membrane; GO:0015121,phosphoenolpyruvate:phosphate antiporter activity; GO:0071917,triose-phosphate transmembrane transporter activity; GO:0008643,carbohydrate transport; GO:0015714,phosphoenolpyruvate transport; GO:0035436,triose phosphate transmembrane transport	Triose-phosphate Transporter family
TRINITY_DN11539_c0_g1_i7.path2	0.54	1.28	1.12	2.38	2.28	2.76	22	65	47	96	116	136	2.109	1.076	0.00132421	0.00998932	up	4A	273750259	273756029	+	TRINITY_DN11539_c0_g1_i7	--	--	Protein POLLEN DEFECTIVE IN GUIDANCE 1 [Zea mays]	--	SubName: Full=Protein POLLEN DEFECTIVE IN GUIDANCE 1 {ECO:0000313|EMBL:AQK63431.1};	--	GO:0016021,integral component of membrane	--
TRINITY_DN115394_c0_g1_i1.path1	1.97	2.47	5.13	0.22	1.41	0.73	9	14	24	1	8	4	0.21	-2.253	0.00587133	0.033387	down	1D	18500956	18501244	+	TRINITY_DN115394_c0_g1_i1	--	--	--	--	--	--	--	--
TRINITY_DN11540_c0_g1_i1.path1	0.46	0.49	0.45	2.98	3.35	6.88	9	12	9	58	82	163	7.854	2.973	7.24015e-11	3.11114e-09	up	1A	233516038	233517967	+	TRINITY_DN11540_c0_g1_i1	--	K01051 pectinesterase [EC:3.1.1.11] | (RefSeq) probable pectinesterase/pectinesterase inhibitor 58 (A)	predicted protein, partial [Hordeum vulgare subsp. vulgare]	RecName: Full=Trihelix transcription factor PTL; AltName: Full=Trihelix DNA-binding protein PETAL LOSS;	SubName: Full=Uncharacterized protein {ECO:0000313|EnsemblPlants:HORVU1Hr1G046940.9};	Transcription factor GT-2 and related proteins, contains trihelix DNA-binding/SANT domain	GO:0005634,nucleus; GO:0003677,DNA binding; GO:0003700,DNA-binding transcription factor activity; GO:0042803,protein homodimerization activity; GO:0048498,establishment of petal orientation; GO:0046621,negative regulation of organ growth; GO:0090428,perianth development; GO:0048441,petal development; GO:0009909,regulation of flower development; GO:0006355,regulation of transcription, DNA-template…	Myb/SANT-like DNA-binding domain
TRINITY_DN11540_c0_g1_i1.path2	1.17	1.6	0.79	4.32	5.19	8.95	23	39	16	84	127	212	4.316	2.11	6.63273e-09	2.0224e-07	up	1D	224395477	224397402	+	TRINITY_DN11540_c0_g1_i1	--	K01051 pectinesterase [EC:3.1.1.11] | (RefSeq) probable pectinesterase/pectinesterase inhibitor 58 (A)	predicted protein, partial [Hordeum vulgare subsp. vulgare]	RecName: Full=Trihelix transcription factor PTL; AltName: Full=Trihelix DNA-binding protein PETAL LOSS;	SubName: Full=Uncharacterized protein {ECO:0000313|EnsemblPlants:HORVU1Hr1G046940.9};	Transcription factor GT-2 and related proteins, contains trihelix DNA-binding/SANT domain	GO:0005634,nucleus; GO:0003677,DNA binding; GO:0003700,DNA-binding transcription factor activity; GO:0042803,protein homodimerization activity; GO:0048498,establishment of petal orientation; GO:0046621,negative regulation of organ growth; GO:0090428,perianth development; GO:0048441,petal development; GO:0009909,regulation of flower development; GO:0006355,regulation of transcription, DNA-template…	Myb/SANT-like DNA-binding domain
TRINITY_DN11540_c0_g1_i1.path3	0.36	0.41	0.2	2.47	3.31	6.5	7	10	4	48	81	154	10.532	3.397	2.92845e-11	1.35291e-09	up	1C	107569980	107571944	+	TRINITY_DN11540_c0_g1_i1	--	K01051 pectinesterase [EC:3.1.1.11] | (RefSeq) probable pectinesterase/pectinesterase inhibitor 58 (A)	predicted protein, partial [Hordeum vulgare subsp. vulgare]	RecName: Full=Trihelix transcription factor PTL; AltName: Full=Trihelix DNA-binding protein PETAL LOSS;	SubName: Full=Uncharacterized protein {ECO:0000313|EnsemblPlants:HORVU1Hr1G046940.9};	Transcription factor GT-2 and related proteins, contains trihelix DNA-binding/SANT domain	GO:0005634,nucleus; GO:0003677,DNA binding; GO:0003700,DNA-binding transcription factor activity; GO:0042803,protein homodimerization activity; GO:0048498,establishment of petal orientation; GO:0046621,negative regulation of organ growth; GO:0090428,perianth development; GO:0048441,petal development; GO:0009909,regulation of flower development; GO:0006355,regulation of transcription, DNA-template…	Myb/SANT-like DNA-binding domain
TRINITY_DN11540_c0_g3_i1.path2	0.18	0.24	0.17	0.74	0.81	0.98	7	12	7	29	40	47	3.577	1.839	0.000553352	0.00484202	up	2A	360619014	360622426	-	TRINITY_DN11540_c0_g3_i1	--	K01051 pectinesterase [EC:3.1.1.11] | (RefSeq) probable pectinesterase/pectinesterase inhibitor 58 (A)	PREDICTED: trihelix transcription factor GTL1-like isoform X2 [Brachypodium distachyon]	RecName: Full=Trihelix transcription factor GT-2; AltName: Full=Trihelix DNA-binding protein GT-2;	SubName: Full=Uncharacterized protein {ECO:0000313|EMBL:KQJ83852.1};	Transcription factor GT-2 and related proteins, contains trihelix DNA-binding/SANT domain	GO:0005634,nucleus; GO:0003677,DNA binding; GO:0003700,DNA-binding transcription factor activity; GO:0006351,transcription, DNA-templated	Myb/SANT-like DNA-binding domain
TRINITY_DN11540_c1_g2_i3.path1	0.78	0.75	0.63	3.39	2.12	5.26	11	13	9	47	37	89	4.153	2.054	3.03899e-05	0.000404787	up	6A	272974350	272976027	+	TRINITY_DN11540_c1_g2_i3	--	--	predicted protein [Hordeum vulgare subsp. vulgare]	RecName: Full=Trihelix transcription factor GTL1; AltName: Full=GT2-LIKE protein 1; Short=AtGTL1; Short=Protein GT-2-LIKE1; AltName: Full=Trihelix DNA-binding protein GTL1;	SubName: Full=Uncharacterized protein {ECO:0000313|EnsemblPlants:HORVU6Hr1G061300.7};	Transcription factor GT-2 and related proteins, contains trihelix DNA-binding/SANT domain	GO:0005634,nucleus; GO:0003677,DNA binding; GO:0003700,DNA-binding transcription factor activity; GO:0043565,sequence-specific DNA binding; GO:0042631,cellular response to water deprivation; GO:0030308,negative regulation of cell growth; GO:0032876,negative regulation of DNA endoreduplication; GO:0045892,negative regulation of transcription, DNA-templated; GO:0008361,regulation of cell size; GO:2…	Myb/SANT-like DNA-binding domain
TRINITY_DN11542_c0_g1_i15.path1	20.65	15.47	11.79	6.76	8.63	7.48	844	783	493	273	439	368	0.403	-1.311	2.4409e-09	8.15628e-08	down	4C	543615057	543618829	+	TRINITY_DN11542_c0_g1_i15	--	--	--	--	--	--	--	--
TRINITY_DN115451_c0_g1_i1.path2	2.59	2.72	1.27	0.26	0.21	0.43	10	13	5	1	1	2	0.116	-3.114	0.00580523	0.0331115	down	4A	54610603	54610846	+	TRINITY_DN115451_c0_g1_i1	--	--	--	--	--	--	--	--
TRINITY_DN11549_c0_g2_i1.path1	0.67	0.89	0.66	3.47	2.21	3.76	11	18	11	56	45	74	3.549	1.827	5.12889e-05	0.000636903	up	6C	150330514	150331631	+	TRINITY_DN11549_c0_g2_i1	--	K01179 endoglucanase [EC:3.2.1.4] | (RefSeq) endoglucanase 11-like (A)	predicted protein [Hordeum vulgare subsp. vulgare]	RecName: Full=Endoglucanase 7; EC=3.2.1.4; AltName: Full=Endo-1,4-beta glucanase 7; AltName: Full=OsGLU10; Flags: Precursor;	RecName: Full=Endoglucanase {ECO:0000256|RuleBase:RU361166}; EC=3.2.1.4 {ECO:0000256|RuleBase:RU361166};	--	GO:0005576,extracellular region; GO:0008810,cellulase activity; GO:0071555,cell wall organization; GO:0030245,cellulose catabolic process	Glycosyl hydrolase family 9
TRINITY_DN11550_c0_g2_i1.path1	8.16	9.97	13.36	7.03	3.9	5.68	74	112	124	63	44	62	0.439	-1.189	0.000305348	0.00292628	down	2C	24459180	24459858	+	TRINITY_DN11550_c0_g2_i1	--	K22369 epoxide hydrolase 4 [EC:3.3.-.-] | (RefSeq) uncharacterized protein LOC104235966 (A)	predicted protein [Hordeum vulgare subsp. vulgare]	--	SubName: Full=Predicted protein {ECO:0000313|EMBL:BAK06224.1};	Predicted hydrolase/acyltransferase (alpha/beta hydrolase superfamily)	GO:0003824,catalytic activity	--
TRINITY_DN11550_c0_g2_i1.path2	1.21	0.98	0.97	4.58	5.49	3.39	11	11	9	41	62	37	3.617	1.855	0.00022289	0.00224112	up	6A	381254393	381255067	-	TRINITY_DN11550_c0_g2_i1	--	K22369 epoxide hydrolase 4 [EC:3.3.-.-] | (RefSeq) uncharacterized protein LOC104235966 (A)	predicted protein [Hordeum vulgare subsp. vulgare]	--	SubName: Full=Predicted protein {ECO:0000313|EMBL:BAK06224.1};	Predicted hydrolase/acyltransferase (alpha/beta hydrolase superfamily)	GO:0003824,catalytic activity	--
TRINITY_DN11551_c0_g1_i1.path2	2.26	2.28	1.31	4.24	3.88	6.66	88	110	52	163	188	312	2.117	1.082	0.000115658	0.00127694	up	7D	511521891	511526755	-	TRINITY_DN11551_c0_g1_i1	--	K17471 sulfate transporter 3 | (RefSeq) LOC109761210; probable sulfate transporter 3.4 (A)	predicted protein [Hordeum vulgare subsp. vulgare]	RecName: Full=Probable sulfate transporter 3.4;	SubName: Full=Predicted protein {ECO:0000313|EMBL:BAJ91790.1};	Sulfate/bicarbonate/oxalate exchanger SAT-1 and related transporters (SLC26 family)	GO:0005887,integral component of plasma membrane; GO:0009506,plasmodesma; GO:0008271,secondary active sulfate transmembrane transporter activity; GO:0015116,sulfate transmembrane transporter activity; GO:0015293,symporter activity	Sulfate permease family
TRINITY_DN1156_c0_g1_i6.path1	1.55	1.49	1.2	0.54	0.84	0.91	58	69	46	20	39	41	0.456	-1.134	0.00215604	0.014941	down	6C	35420412	35422838	-	TRINITY_DN1156_c0_g1_i6	--	K10666 E3 ubiquitin-protein ligase RNF5 [EC:2.3.2.27] | (RefSeq) E3 ubiquitin-protein ligase RMA3-like (A)	PREDICTED: E3 ubiquitin-protein ligase RMA3-like, partial [Brachypodium distachyon]	RecName: Full=E3 ubiquitin-protein ligase RMA3; EC=2.3.2.27; AltName: Full=Protein RING membrane-anchor 3; AltName: Full=RING-type E3 ubiquitin transferase RMA3 {ECO:0000305};	SubName: Full=Uncharacterized protein {ECO:0000313|EnsemblPlants:HORVU6Hr1G060440.4};	Predicted E3 ubiquitin ligase	GO:0036513,Derlin-1 retrotranslocation complex; GO:0005783,endoplasmic reticulum; GO:0016021,integral component of membrane; GO:0046872,metal ion binding; GO:1904264,NA; GO:0044390,ubiquitin-like protein conjugating enzyme binding; GO:0004842,ubiquitin-protein transferase activity; GO:0071712,ER-associated misfolded protein catabolic process; GO:0042787,NA	Zinc finger, C3HC4 type (RING finger)
TRINITY_DN115603_c0_g1_i1.path1	19.09	20.8	15.11	75.73	50.15	69.42	100	135	81	392	327	438	2.986	1.578	1.33403e-11	6.5431e-10	up	2C	515755167	515755497	+	TRINITY_DN115603_c0_g1_i1	--	K00432 glutathione peroxidase [EC:1.11.1.9] | (RefSeq) probable phospholipid hydroperoxide glutathione peroxidase (A)	putative phospholipid hydroperoxide glutathione peroxidase [Ananas comosus]	RecName: Full=Probable phospholipid hydroperoxide glutathione peroxidase 6, mitochondrial; Short=AtGPX1; Short=PHGPx; EC=1.11.1.12; Flags: Precursor;	RecName: Full=Glutathione peroxidase {ECO:0000256|RuleBase:RU000499};	Glutathione peroxidase	GO:0048046,apoplast; GO:0009507,chloroplast; GO:0005829,cytosol; GO:0005739,mitochondrion; GO:0005886,plasma membrane; GO:0004602,glutathione peroxidase activity; GO:0047066,phospholipid-hydroperoxide glutathione peroxidase activity; GO:0046686,response to cadmium ion; GO:0006979,response to oxidative stress; GO:0009651,response to salt stress	Glutathione peroxidase
TRINITY_DN11564_c0_g1_i5.path1	2.56	2.34	2.68	113.99	79.19	109.26	68	77	73	2993	2619	3497	33.5	5.066	7.79437e-132	2.85192e-127	up	4A	401884515	401887366	+	TRINITY_DN11564_c0_g1_i5	--	K19891 glucan endo-1,3-beta-glucosidase 1/2/3 [EC:3.2.1.39] | (RefSeq) glucan endo-1,3-beta-glucosidase 3 (A)	glucan endo-1,3-beta-glucosidase 14-like isoform X2 [Aegilops tauschii subsp. tauschii]	RecName: Full=Glucan endo-1,3-beta-glucosidase 14; EC=3.2.1.39; AltName: Full=(1->3)-beta-glucan endohydrolase 14; Short=(1->3)-beta-glucanase 14; AltName: Full=Beta-1,3-endoglucanase 14; Short=Beta-1,3-glucanase 14; Flags: Precursor;	SubName: Full=Uncharacterized protein {ECO:0000313|EnsemblPlants:TRIAE_CS42_3DL_TGACv1_251757_AA0884610.2};	--	GO:0046658,anchored component of plasma membrane; GO:0005618,cell wall; GO:0005737,cytoplasm; GO:0005576,extracellular region; GO:0005634,nucleus; GO:0042973,glucan endo-1,3-beta-D-glucosidase activity; GO:0004553,hydrolase activity, hydrolyzing O-glycosyl compounds; GO:0030247,polysaccharide binding; GO:0005975,carbohydrate metabolic process; GO:0071555,cell wall organization; GO:0006952,defense…	Glycosyl hydrolases family 17
TRINITY_DN11564_c0_g2_i1.path1	6.07	4.9	8.48	30.04	25.52	15.28	35	35	50	171	183	106	3.077	1.621	4.34194e-06	7.25101e-05	up	1A	334526726	334527089	-	TRINITY_DN11564_c0_g2_i1	--	K19892 glucan endo-1,3-beta-glucosidase 4 [EC:3.2.1.39] | (RefSeq) glucan endo-1,3-beta-glucosidase 4-like (A)	glucan endo-1,3-beta-glucosidase 14-like isoform X2 [Aegilops tauschii subsp. tauschii]	RecName: Full=Glucan endo-1,3-beta-glucosidase 14; EC=3.2.1.39; AltName: Full=(1->3)-beta-glucan endohydrolase 14; Short=(1->3)-beta-glucanase 14; AltName: Full=Beta-1,3-endoglucanase 14; Short=Beta-1,3-glucanase 14; Flags: Precursor;	SubName: Full=Uncharacterized protein {ECO:0000313|EnsemblPlants:HORVU1Hr1G073820.5};	--	GO:0046658,anchored component of plasma membrane; GO:0005618,cell wall; GO:0005737,cytoplasm; GO:0005576,extracellular region; GO:0005634,nucleus; GO:0042973,glucan endo-1,3-beta-D-glucosidase activity; GO:0004553,hydrolase activity, hydrolyzing O-glycosyl compounds; GO:0030247,polysaccharide binding; GO:0005975,carbohydrate metabolic process; GO:0071555,cell wall organization; GO:0006952,defense…	--
TRINITY_DN11564_c0_g2_i1.path3	0	1.68	0.17	5.09	2.23	4.32	0	12	1	29	16	30	5.177	2.372	0.00474585	0.0281851	up	1A	477235472	477235835	-	TRINITY_DN11564_c0_g2_i1	--	K19892 glucan endo-1,3-beta-glucosidase 4 [EC:3.2.1.39] | (RefSeq) glucan endo-1,3-beta-glucosidase 4-like (A)	glucan endo-1,3-beta-glucosidase 14-like isoform X2 [Aegilops tauschii subsp. tauschii]	RecName: Full=Glucan endo-1,3-beta-glucosidase 14; EC=3.2.1.39; AltName: Full=(1->3)-beta-glucan endohydrolase 14; Short=(1->3)-beta-glucanase 14; AltName: Full=Beta-1,3-endoglucanase 14; Short=Beta-1,3-glucanase 14; Flags: Precursor;	SubName: Full=Uncharacterized protein {ECO:0000313|EnsemblPlants:HORVU1Hr1G073820.5};	--	GO:0046658,anchored component of plasma membrane; GO:0005618,cell wall; GO:0005737,cytoplasm; GO:0005576,extracellular region; GO:0005634,nucleus; GO:0042973,glucan endo-1,3-beta-D-glucosidase activity; GO:0004553,hydrolase activity, hydrolyzing O-glycosyl compounds; GO:0030247,polysaccharide binding; GO:0005975,carbohydrate metabolic process; GO:0071555,cell wall organization; GO:0006952,defense…	--
TRINITY_DN115645_c0_g1_i1.path1	0.26	1.05	0.51	2.88	5.62	5.37	1	5	2	11	27	25	6.334	2.663	0.00156585	0.0114794	up	7C	394941958	394942278	-	TRINITY_DN115645_c0_g1_i1	--	--	--	--	--	--	--	--
TRINITY_DN115674_c0_g1_i1.path1	7.9	11.16	10.37	47.46	53.54	45.9	32	56	43	190	270	224	4.204	2.072	2.24557e-14	1.65487e-12	up	6C	464308393	464308648	+	TRINITY_DN115674_c0_g1_i1	--	--	--	--	--	--	--	--
TRINITY_DN115694_c0_g1_i1.path1	4.06	7.37	13.14	2.82	2.04	6.11	16	36	53	11	10	29	0.367	-1.447	0.00978338	0.0498703	down	5A	416212014	416212262	+	TRINITY_DN115694_c0_g1_i1	--	--	--	--	--	--	--	--
TRINITY_DN1157_c0_g1_i2.path1	1.72	2	1.56	4.91	4.21	5.16	71	102	66	200	216	256	2.27	1.182	7.43375e-07	1.50399e-05	up	4D	271504902	271514526	-	TRINITY_DN1157_c0_g1_i2	--	K00863 triose/dihydroxyacetone kinase / FAD-AMP lyase (cyclizing) [EC:2.7.1.28 2.7.1.29 4.6.1.15] | (RefSeq) putative 3,4-dihydroxy-2-butanone kinase (A)	hypothetical protein BRADI_1g10550v3 [Brachypodium distachyon]	RecName: Full=Putative 3,4-dihydroxy-2-butanone kinase; EC=2.7.1.-;	SubName: Full=Uncharacterized protein {ECO:0000313|EMBL:KQK13501.1};	Dihydroxyacetone kinase/glycerone kinase	GO:0005524,ATP binding; GO:0004371,glycerone kinase activity; GO:0006071,glycerol metabolic process	DAK2 domain
TRINITY_DN11571_c0_g1_i4.path1	6.3	4.55	4.37	2.18	2.63	2.91	237	212	168	81	123	132	0.426	-1.23	7.24223e-07	1.46606e-05	down	3D	36978825	36982350	+	TRINITY_DN11571_c0_g1_i4	--	--	--	--	--	--	--	--
TRINITY_DN115729_c0_g1_i1.path2	5.36	4.55	4.13	7.99	17.45	14.52	19	20	15	28	77	62	2.405	1.266	0.00501648	0.0294671	up	5A	22732910	22733309	-	TRINITY_DN115729_c0_g1_i1	--	K14685 solute carrier family 40 (iron-regulated transporter), member 1 | (RefSeq) solute carrier family 40 member 3, chloroplastic-like isoform X1 (A)	PREDICTED: solute carrier family 40 member 3, chloroplastic-like [Brachypodium distachyon]	RecName: Full=Solute carrier family 40 member 3, chloroplastic; Flags: Precursor;	SubName: Full=Uncharacterized protein {ECO:0000313|EnsemblPlants:HORVU4Hr1G062070.15};	Iron transporter	GO:0009941,chloroplast envelope; GO:0016021,integral component of membrane; GO:0005381,iron ion transmembrane transporter activity	Ferroportin1 (FPN1)
TRINITY_DN11576_c1_g1_i1.path1	13.11	11.87	16.5	2.41	5.43	10.06	66	74	85	12	34	61	0.358	-1.481	0.000377355	0.00351374	down	2A	352538290	352538607	-	TRINITY_DN11576_c1_g1_i1	--	--	--	--	--	--	--	--
TRINITY_DN11578_c0_g1_i4.path1	9.96	25.48	5.41	137.79	162.86	36.08	392	1242	218	5357	7975	1710	7.279	2.864	0.000668799	0.00567839	up	7D	524852351	524855748	-	TRINITY_DN11578_c0_g1_i4	--	K21351 sucrose:sucrose fructosyltransferase [EC:2.4.1.99] | (RefSeq) LOC109745827; sucrose:sucrose 1-fructosyltransferase-like (A)	fructan:fructan 6G-fructosyltransferase [Lolium perenne]	RecName: Full=Sucrose:sucrose 1-fructosyltransferase; EC=2.4.1.99; AltName: Full=Sucrose 1(F)-fructosyltransferase; AltName: Full=Sucrose:sucrose 1(F)-beta-D-fructosyltransferase; Flags: Precursor;	SubName: Full=Fructan:fructan 6G-fructosyltransferase {ECO:0000313|EMBL:AAM13671.1};	Beta-fructofuranosidase (invertase)	GO:0005773,vacuole; GO:0050306,sucrose 1F-fructosyltransferase activity; GO:0004575,sucrose alpha-glucosidase activity; GO:0005975,carbohydrate metabolic process	Glycosyl hydrolases family 32 N-terminal domain
TRINITY_DN115809_c0_g1_i1.path1	13.11	11.97	11.97	1.74	5.35	5.89	61	69	57	8	31	33	0.296	-1.755	2.90777e-05	0.000389793	down	3C	40441377	40442018	-	TRINITY_DN115809_c0_g1_i1	--	K16903 L-tryptophan---pyruvate aminotransferase [EC:2.6.1.99] | (RefSeq) LOC109749870; L-tryptophan--pyruvate aminotransferase 1-like (A)	Tryptophan aminotransferase 1 [Triticum urartu]	RecName: Full=Tryptophan aminotransferase-related protein 2; EC=2.6.1.27; EC=2.6.1.99;	SubName: Full=Tryptophan aminotransferase 1 {ECO:0000313|EMBL:EMS59830.1, ECO:0000313|EnsemblPlants:TRIUR3_06776-P1};	--	GO:0005789,endoplasmic reticulum membrane; GO:0016021,integral component of membrane; GO:0016846,carbon-sulfur lyase activity; GO:0050362,L-tryptophan:2-oxoglutarate aminotransferase activity; GO:0080097,L-tryptophan:pyruvate aminotransferase activity; GO:0009851,auxin biosynthetic process; GO:0043562,cellular response to nitrogen levels; GO:0042742,defense response to bacterium; GO:0009908,flowe…	Allinase
TRINITY_DN11588_c0_g1_i1.path1	1.42	2.07	1.11	0.36	0.29	0.71	20	36	16	5	5	12	0.247	-2.017	0.00132752	0.0100089	down	6D	250158661	250159634	+	TRINITY_DN11588_c0_g1_i1	--	--	LUC7 related protein [Zea mays]	--	SubName: Full=Uncharacterized protein {ECO:0000313|EMBL:EMT24156.1, ECO:0000313|EnsemblPlants:EMT24156};	Spliceosome subunit	GO:0005685,U1 snRNP; GO:0003729,mRNA binding; GO:0006376,mRNA splice site selection	--
TRINITY_DN11588_c0_g1_i1.path2	1.35	1.38	0.97	0.29	0.29	0.59	19	24	14	4	5	10	0.264	-1.92	0.00417146	0.0254047	down	6A	287661380	287662356	+	TRINITY_DN11588_c0_g1_i1	--	--	LUC7 related protein [Zea mays]	--	SubName: Full=Uncharacterized protein {ECO:0000313|EMBL:EMT24156.1, ECO:0000313|EnsemblPlants:EMT24156};	Spliceosome subunit	GO:0005685,U1 snRNP; GO:0003729,mRNA binding; GO:0006376,mRNA splice site selection	--
TRINITY_DN11591_c0_g1_i1.path1	10.6	7.46	12.81	6.55	3.06	4.24	195	170	241	119	70	94	0.373	-1.423	5.31392e-06	8.68589e-05	down	7C	579661910	579666349	+	TRINITY_DN11591_c0_g1_i1	--	K09753 cinnamoyl-CoA reductase [EC:1.2.1.44] | (Kazusa) Lj3g3v2148260.1; - (A)	cinnamoyl-CoA reductase 2-like [Aegilops tauschii subsp. tauschii]	RecName: Full=Cinnamoyl-CoA reductase 2; Short=AtCCR2; EC=1.2.1.44;	SubName: Full=Uncharacterized protein {ECO:0000313|EnsemblPlants:TRIAE_CS42_5DS_TGACv1_458278_AA1493020.1};	Flavonol reductase/cinnamoyl-CoA reductase	GO:0016621,cinnamoyl-CoA reductase activity; GO:0050662,coenzyme binding; GO:0007623,circadian rhythm; GO:0006952,defense response; GO:0042754,negative regulation of circadian rhythm; GO:0009699,phenylpropanoid biosynthetic process; GO:0009409,response to cold	NAD dependent epimerase/dehydratase family
TRINITY_DN11602_c0_g1_i2.path1	0.71	0.75	0.42	11.22	11.48	12.86	10	13	6	156	201	218	15.907	3.992	1.64058e-26	3.70544e-24	up	6C	279856471	279857642	-	TRINITY_DN11602_c0_g1_i2	--	--	--	--	--	--	--	--
TRINITY_DN11603_c0_g1_i1.path2	44.14	87.76	98.86	25.41	26.01	42.76	480	1182	1100	273	352	560	0.339	-1.56	6.5624e-09	2.00346e-07	down	6D	279620251	279620937	+	TRINITY_DN11603_c0_g1_i1	--	K16055 trehalose 6-phosphate synthase/phosphatase [EC:2.4.1.15 3.1.3.12] | (RefSeq) probable alpha,alpha-trehalose-phosphate synthase [UDP-forming] 11 (A)	PREDICTED: probable alpha,alpha-trehalose-phosphate synthase [UDP-forming]	RecName: Full=Probable alpha,alpha-trehalose-phosphate synthase [UDP-forming] 11; EC=2.4.1.15; AltName: Full=Trehalose-6-phosphate synthase 11; Short=AtTPS11;	SubName: Full=Uncharacterized protein {ECO:0000313|EMBL:KQK01090.1, ECO:0000313|EnsemblPlants:BRADI3G53790.1};	Trehalose-6-phosphate synthase component TPS1 and related subunits	GO:0005829,cytosol; GO:0005739,mitochondrion; GO:0016791,phosphatase activity; GO:0016757,transferase activity, transferring glycosyl groups; GO:0005992,trehalose biosynthetic process; GO:0070413,trehalose metabolism in response to stress	Glycosyltransferase family 20
TRINITY_DN11610_c0_g2_i1.path1	8.19	6.91	8.72	3.32	5.27	5.14	45	47	49	18	36	34	0.485	-1.044	0.00880223	0.0459148	down	7D	63146963	63147309	-	TRINITY_DN11610_c0_g2_i1	--	--	--	--	--	--	--	--
TRINITY_DN11640_c0_g2_i1.path1	43.31	47.64	54.95	26.94	28.42	25.07	218	297	283	134	178	152	0.463	-1.11	6.90535e-07	1.40564e-05	down	1A	471051519	471051836	+	TRINITY_DN11640_c0_g2_i1	--	--	--	--	--	--	--	--
TRINITY_DN11651_c0_g1_i1.path2	1.73	3	2.75	8.18	5.52	4.99	40	86	65	187	159	139	2.109	1.076	0.0005352	0.00471134	up	4D	214366863	214370374	-	TRINITY_DN11651_c0_g1_i1	--	--	PREDICTED: uncharacterized protein LOC100821526 [Brachypodium distachyon]	--	SubName: Full=Uncharacterized protein {ECO:0000313|EMBL:KQJ99555.1, ECO:0000313|EnsemblPlants:BRADI3G43860.1};	--	--	--
TRINITY_DN11656_c0_g1_i1.path1	52.97	48.4	54.15	23.19	24.64	31.39	3165	3582	3311	1369	1832	2259	0.425	-1.235	6.63376e-14	4.57111e-12	down	4D	271012386	271019194	+	TRINITY_DN11656_c0_g1_i1	--	K14489 arabidopsis histidine kinase 2/3/4 (cytokinin receptor) [EC:2.7.13.3] | (RefSeq) probable histidine kinase 4 (A)	hypothetical protein BRADI_1g10660v3 [Brachypodium distachyon]	RecName: Full=Probable histidine kinase 4 {ECO:0000305}; Short=OsHK4 {ECO:0000303|PubMed:22642989}; EC=2.7.13.3 {ECO:0000305}; AltName: Full=OsCRL1b {ECO:0000305};	SubName: Full=Uncharacterized protein {ECO:0000313|EMBL:KQK13518.1, ECO:0000313|EnsemblPlants:BRADI1G10660.1};	Sensory transduction histidine kinase	GO:0016021,integral component of membrane; GO:0005622,intracellular; GO:0005886,plasma membrane; GO:0019955,cytokine binding; GO:0000155,phosphorelay sensor kinase activity; GO:0004673,protein histidine kinase activity; GO:0009736,cytokinin-activated signaling pathway; GO:0006468,protein phosphorylation	CHASE domain
TRINITY_DN11660_c0_g1_i1.path1	2.56	4.69	4	9.68	8.78	10.07	15	34	24	56	64	71	2.123	1.086	0.00539533	0.0312016	up	3A	317181097	317181466	-	TRINITY_DN11660_c0_g1_i1	--	--	--	RecName: Full=Acylamino-acid-releasing enzyme 2 {ECO:0000305}; Short=AARE2 {ECO:0000305}; EC=3.4.19.1 {ECO:0000305};	--	--	GO:0005737,cytoplasm; GO:0004252,serine-type endopeptidase activity	--
TRINITY_DN11660_c0_g1_i1.path2	2.39	2.76	1.84	7.09	8.78	7.37	14	20	11	41	64	52	2.809	1.49	0.000787549	0.00651946	up	3D	63346392	63346761	+	TRINITY_DN11660_c0_g1_i1	--	--	--	RecName: Full=Acylamino-acid-releasing enzyme 2 {ECO:0000305}; Short=AARE2 {ECO:0000305}; EC=3.4.19.1 {ECO:0000305};	--	--	GO:0005737,cytoplasm; GO:0004252,serine-type endopeptidase activity	--
TRINITY_DN11662_c0_g1_i1.path1	6.56	7.71	5.99	1.15	1.6	3.32	46	67	43	8	14	28	0.252	-1.989	9.73382e-06	0.000148367	down	7C	639905327	639905769	+	TRINITY_DN11662_c0_g1_i1	--	--	protein NLP1-like [Aegilops tauschii subsp. tauschii]	RecName: Full=Protein NLP1; Short=OsNLP1; AltName: Full=NIN-like protein 1; AltName: Full=Nodule inception protein-like protein 1;	SubName: Full=Uncharacterized protein {ECO:0000313|EnsemblPlants:HORVU4Hr1G082110.2};	--	GO:0005634,nucleus; GO:0003677,DNA binding; GO:0006355,regulation of transcription, DNA-templated; GO:0006351,transcription, DNA-templated	--
TRINITY_DN11675_c1_g1_i3.path1	57.63	57.08	46.84	33.48	28.96	26.64	291	357	242	167	182	162	0.465	-1.104	2.68844e-07	5.95452e-06	down	3C	66288925	66293783	-	TRINITY_DN11675_c1_g1_i3	--	K02990 small subunit ribosomal protein S6 | (RefSeq) uncharacterized protein LOC109732011 (A)	predicted protein [Hordeum vulgare subsp. vulgare]	--	SubName: Full=Uncharacterized protein {ECO:0000313|EnsemblPlants:HORVU3Hr1G029510.1};	Mitochondrial ribosomal protein MRP17	GO:0005840,ribosome; GO:0019843,rRNA binding; GO:0003735,structural constituent of ribosome; GO:0006412,translation	Ribosomal protein S6
TRINITY_DN11677_c0_g1_i10.path1	10.62	9	6.7	3	5.18	4.76	341	358	220	95	207	184	0.415	-1.269	4.23275e-07	8.9792e-06	down	6A	375988487	375992173	-	TRINITY_DN11677_c0_g1_i10	--	--	--	--	--	--	--	--
TRINITY_DN11681_c0_g1_i7.path2	0.2	0.48	0.38	1.11	1.2	1.04	15	44	29	82	111	93	2.659	1.411	0.00011088	0.00123109	up	4D	330546204	330554993	-	TRINITY_DN11681_c0_g1_i7	--	K02320 DNA polymerase alpha subunit A [EC:2.7.7.7] | (RefSeq) LOC109753884; DNA polymerase alpha catalytic subunit (A)	DNA polymerase alpha catalytic subunit [Aegilops tauschii subsp. tauschii]	RecName: Full=DNA polymerase alpha catalytic subunit; EC=2.7.7.7;	RecName: Full=DNA polymerase {ECO:0000256|RuleBase:RU000442}; EC=2.7.7.7 {ECO:0000256|RuleBase:RU000442};	DNA polymerase alpha, catalytic subunit	GO:0005658,alpha DNA polymerase:primase complex; GO:0005634,nucleus; GO:0008408,3'-5' exonuclease activity; GO:0051539,4 iron, 4 sulfur cluster binding; GO:0003677,DNA binding; GO:0003896,DNA primase activity; GO:0003887,DNA-directed DNA polymerase activity; GO:0046872,metal ion binding; GO:0001882,nucleoside binding; GO:0000166,nucleotide binding; GO:0006270,DNA replication initiation; GO:000630…	DNA polymerase family B
TRINITY_DN1169_c0_g1_i2.path1	4.25	5.27	4.57	35.19	35.07	29.71	150	230	165	1226	1539	1262	5.993	2.583	7.85561e-43	5.69174e-40	up	7C	680098138	680104618	+	TRINITY_DN1169_c0_g1_i2	--	K14777 ATP-dependent RNA helicase DDX47/RRP3 [EC:3.6.4.13] | (RefSeq) LOC109767222; DEAD-box ATP-dependent RNA helicase 10 (A)	DEAD-box ATP-dependent RNA helicase 10 [Aegilops tauschii subsp. tauschii]	RecName: Full=DEAD-box ATP-dependent RNA helicase 10; EC=3.6.4.13;	SubName: Full=Uncharacterized protein {ECO:0000313|EnsemblPlants:TRIAE_CS42_U_TGACv1_641396_AA2093740.1};	ATP-dependent RNA helicase	GO:0005737,cytoplasm; GO:0005730,nucleolus; GO:0005524,ATP binding; GO:0004004,ATP-dependent RNA helicase activity; GO:0003723,RNA binding; GO:0010501,RNA secondary structure unwinding; GO:0006364,rRNA processing	DEAD/DEAH box helicase
TRINITY_DN11691_c0_g1_i1.path1	22.52	21.93	19.71	12.64	12.82	11.74	422	509	378	234	299	265	0.489	-1.033	3.87116e-08	1.01319e-06	down	5D	82801474	82810023	+	TRINITY_DN11691_c0_g1_i1	--	--	ethylene-responsive transcription factor-like protein At4g13040 [Aegilops tauschii subsp. tauschii]	RecName: Full=Ethylene-responsive transcription factor-like protein At4g13040;	SubName: Full=Uncharacterized protein {ECO:0000313|EnsemblPlants:TRIAE_CS42_6DS_TGACv1_542507_AA1723010.1};	--	GO:0005634,nucleus; GO:0003677,DNA binding; GO:0003700,DNA-binding transcription factor activity; GO:0009873,ethylene-activated signaling pathway; GO:0007275,multicellular organism development; GO:0006351,transcription, DNA-templated	AP2 domain
TRINITY_DN11691_c0_g1_i1.path2	47.17	41.63	42.68	28.8	25.64	23.36	902	986	835	544	610	538	0.498	-1.005	3.26351e-08	8.64664e-07	down	4C	28084259	28091586	-	TRINITY_DN11691_c0_g1_i1	--	--	ethylene-responsive transcription factor-like protein At4g13040 [Aegilops tauschii subsp. tauschii]	RecName: Full=Ethylene-responsive transcription factor-like protein At4g13040;	SubName: Full=Uncharacterized protein {ECO:0000313|EnsemblPlants:TRIAE_CS42_6DS_TGACv1_542507_AA1723010.1};	--	GO:0005634,nucleus; GO:0003677,DNA binding; GO:0003700,DNA-binding transcription factor activity; GO:0009873,ethylene-activated signaling pathway; GO:0007275,multicellular organism development; GO:0006351,transcription, DNA-templated	AP2 domain
TRINITY_DN11691_c0_g3_i1.path1	8.1	13.86	14.41	7.87	6.51	6.73	50	106	91	48	50	50	0.486	-1.04	0.00205807	0.0143943	down	5A	114377080	114377469	+	TRINITY_DN11691_c0_g3_i1	--	--	--	--	--	--	--	--
TRINITY_DN11718_c1_g1_i1.path1	19.27	16.08	9.84	5.64	9.64	7.47	90	93	47	26	56	42	0.428	-1.225	0.000756226	0.00630941	down	5D	387119598	387119892	-	TRINITY_DN11718_c1_g1_i1	--	--	--	--	--	--	--	--
TRINITY_DN11731_c1_g1_i1.path1	0.21	0.17	0.08	0.63	1.04	0.85	10	10	4	30	62	49	4.66	2.22	3.80588e-05	0.00049146	up	3D	93006559	93010409	+	TRINITY_DN11731_c1_g1_i1	--	--	--	--	--	--	--	--
TRINITY_DN11733_c0_g4_i1.path1	45.85	45.45	37.34	13.41	17.4	35.11	180	221	150	52	85	166	0.427	-1.229	4.39427e-05	0.000557504	down	7A	236425330	236425577	-	TRINITY_DN11733_c0_g4_i1	--	--	--	--	--	--	--	--
TRINITY_DN11749_c0_g1_i1.path1	3.8	11.7	8.36	58.41	34.16	19.92	16	61	36	243	179	101	4.018	2.007	1.11902e-06	2.16924e-05	up	1A	360935683	360935948	-	TRINITY_DN11749_c0_g1_i1	--	--	--	--	--	--	--	--
TRINITY_DN11749_c0_g1_i1.path2	9.26	5.37	3.95	17.07	11.64	17.75	39	28	17	71	61	90	2.104	1.073	0.00681049	0.0375988	up	1D	346671771	346672036	-	TRINITY_DN11749_c0_g1_i1	--	--	--	--	--	--	--	--
TRINITY_DN11755_c1_g1_i1.path2	543.03	531.09	403.08	235.09	317.41	207.87	4358	5279	3310	1864	3170	2009	0.437	-1.194	2.19836e-09	7.42381e-08	down	3A	358137840	358138448	+	TRINITY_DN11755_c1_g1_i1	--	K01595 phosphoenolpyruvate carboxylase [EC:4.1.1.31] | (RefSeq) LOC109776770; phosphoenolpyruvate carboxylase 1-like (A)	predicted protein [Hordeum vulgare subsp. vulgare]	RecName: Full=Phosphoenolpyruvate carboxylase; Short=PEPC; Short=PEPCase; EC=4.1.1.31;	SubName: Full=Uncharacterized protein {ECO:0000313|EnsemblPlants:HORVU3Hr1G029200.2};	--	GO:0005737,cytoplasm; GO:0008964,phosphoenolpyruvate carboxylase activity; GO:0015977,carbon fixation; GO:0015979,photosynthesis; GO:0006099,tricarboxylic acid cycle	--
[truncated: 8,229 more rows]
