# Supplementary material for: Metabolome and Transcriptome Analyses Reveal the Differences in the Molecular Mechanisms of Oat Leaves Responding to Salt and Alkali Stress Conditions
Source: MDPI journal article supplement (doi:10.3390/agronomy13061441), 2023-05-23
Supplement: s1 [file s1 › Supplementary Table S5.pdf]

Supplementary Table S5 Some differentially expressed genes in oat leaves at AS vs CK, and SS vs CK

| Function              | Gene ID                        | Gene name       | Description                      | Fold Change |       | Log <sub>2</sub> Fold Change |        | Regulated      |       |
|-----------------------|--------------------------------|-----------------|----------------------------------|-------------|-------|------------------------------|--------|----------------|-------|
|                       |                                |                 |                                  | SS/CK       | AS/CK | SS/CK                        | AS/CK  | SS/CK          | AS/CK |
| Chlorophyll synthesis | TRINITY_DN13532_c0_g1_i6.path1 | <i>CHLH</i>     | Magnesium-chelatase subunit ChlH | 0.688       | 0.042 | -0.54                        | -4.587 | No Significant | down  |
|                       | TRINITY_DN15980_c0_g1_i1.path1 | <i>chlB</i>     | Protochlorophyllide reductase B  | 1.077       | 0.177 | 0.107                        | -2.5   | No Significant | Down  |
|                       | TRINITY_DN17549_c0_g3_i6.path1 | <i>HEMD</i>     | uroporphyrinogen-III synthase    | 1.048       | 0.3   | 0.067                        | -1.737 | No Significant | Down  |
|                       | TRINITY_DN19318_c0_g1_i5.path1 | <i>PPO</i>      | Protoporphyrinogen oxidase       | 1.233       | 0.443 | 0.303                        | -1.174 | No Significant | Down  |
| Antioxidation         | TRINITY_DN25460_c0_g2_i3.path1 | <i>MnSOD</i>    | Superoxide dismutase [Mn]        | 1.28        | 2.185 | 0.356                        | 1.128  | No Significant | Up    |
|                       | TRINITY_DN3580_c0_g1_i2.path2  | <i>CuZn SOD</i> | Superoxide dismutase [Cu-Zn] 4AP | 2.848       | 5.527 | 1.51                         | 2.466  | Up             | Up    |
| Growth                | TRINITY_DN37773_c0_g1_i1.path1 | <i>VLN3</i>     | Villin-3                         | 0.664       | 0.407 | -0.59                        | -1.296 | No Significant | Down  |
