# Supplementary material for: Metabolome and Transcriptome Analyses Reveal the Differences in the Molecular Mechanisms of Oat Leaves Responding to Salt and Alkali Stress Conditions
Source: MDPI journal article supplement (doi:10.3390/agronomy13061441), 2023-05-23
Supplement: s1 [file s1 › Supplementary Table S6.xls]

## Sheet: Sheet1
Supplementary Table S6 The differentially expressed metabolites in oat leaves at AS vs Ck
Class		Index	Formula	Compounds	CKL-1	CKL-2	CKL-3	JL-1	JL-2	JL-3	VIP	Fold_Change	Log2FC	Type
Amino acids and derivatives		pme3033	C4H9NO2	N,N-Dimethylglycine	479290	415030	507420	219980	213530	190350	1.18911	0.445061	-1.16792	down
		pme0006	C5H9NO2	L-Proline	5267400	5757200	5263900	70089000	63411000	63398000	1.20819	12.0882	3.59552	up
		mws0256	C5H11NO2	L-Valine	2221200	2299400	2252400	13324000	12686000	11792000	1.20782	5.58128	2.4806	up
		pme2634	C5H11NO2	DL-Norvaline	2372800	2638200	2512700	14156000	13979000	13977000	1.20821	5.59725	2.48472	up
		mws0230	C4H9NO3	L-(-)-Threonine	1704100	1561500	2369100	348730	203850	259840	1.18397	0.144182	-2.79404	down
		pme0195	C3H7NO2S	L-Cysteine	736380	751330	900180	2164300	2114200	1871100	1.19279	2.57533	1.36476	up
		mws0263	C5H7NO3	L-PyroglutamicAcid	9	9	9	9680.5	4603.6	9827.1	1.20582	893.007	9.80253	up
		mws1570	C5H9NO3	Cis-4-Hydroxy-D-proline	112970	103050	116880	279200	304590	260290	1.19934	2.53554	1.34229	up
		mws1587	C6H13NO2	α-Aminocaproic acid	63980	74290	66164	323000	330970	354000	1.20638	4.93054	2.30175	up
		mws0001	C4H8N2O3	L-Asparagine Anhydrous	2104600	3490200	1994800	847240	214120	358500	1.08773	0.18708	-2.41828	down
		pme2527	C5H12N2O2	L-Ornithine	146490	150470	174880	23740	17379	16430	1.20052	0.121967	-3.03543	down
		pme1002	C8H11NO	L-Tyramine	233590	252300	250930	673050	688790	560100	1.19589	2.60843	1.38318	up
		pme0026	C6H14N2O2	L-(+)-Lysine	4577200	4137600	5180600	2777500	1826300	1404900	1.09146	0.432424	-1.20948	down
		pme0014	C5H9NO4	L-Glutamic acid	8907700	8177000	8397100	9	9	9	1.20903	1.05958e-06	-19.8481	down
		mws1050	C5H9NO4	O-Acetylserine	308760	317180	320340	69895	62165	64317	1.20777	0.207525	-2.26864	down
		pme1210	C5H11NO2S	L-Methionine	888070	901850	827910	4459100	5239600	3760300	1.19986	5.14128	2.36213	up
		mws0254	C6H9N3O2	L-Histidine	302560	454100	213000	1187900	566030	1018100	1.03728	2.85876	1.51539	up
		pme0021	C9H11NO2	L-Phenylalanine	5976500	6703700	6060400	47456000	47437000	46014000	1.20812	7.51881	2.9105	up
		pme0253	C8H15NO3	N-Acetyl-L-leucine	35696	32331	27477	350910	369290	341190	1.20636	11.1136	3.47425	up
		mws0260	C6H14N4O2	L-(+)-Arginine	179530	321280	314420	2864700	2345000	2152500	1.18812	9.03083	3.17486	up
		pme0008	C6H13N3O3	L-Citrulline	263260	276740	195200	990860	938370	883000	1.19195	3.82512	1.93551	up
		pmb0468	C6H11NO3S	N-formylmethionine	11290	11347	10177	87398	106460	84736	1.20554	8.4901	3.08578	up
		mws0250	C9H11NO3	L-(-)-Tyrosine	619080	597440	554500	2384200	2824800	2183800	1.20084	4.17432	2.06154	up
		pme0075	C7H11NO5	N-Acetyl-L-glutamic acid	356250	318320	412450	38190	31689	36589	1.20498	0.0979448	-3.35189	down
		pmb2561	C7H13NO3S	N-Acetylmethionine	9	9	9	40305	40737	34262	1.2089	4270.52	12.0602	up
		mws0282	C11H12N2O2	L-Tryptophan	311970	284170	309800	1555400	1413400	1440300	1.20738	4.86688	2.283	up
		pme1228	C11H12N2O3	5-Hydroxy-L-tryptophan	42413	55358	44509	135450	123530	93758	1.15569	2.47918	1.30986	up
		mws5042	C11H14N2O3	Glycylphenylalanine	40390	40441	37420	123390	117630	114380	1.20664	3.00547	1.58759	up
		pmb0962	C10H22N2O4	Lysine butyrate	2747100	2523700	2744100	22855000	19826000	19796000	1.20728	7.79511	2.96257	up
		mws4176	C12H16N2O3	DL-Alanyl-DL-phenylalanine	12024	7261.4	8562.2	40998	43548	39521	1.18586	4.45521	2.15549	up
		pmb2591	C13H14N2O3	Acetyltryptophan	6825.6	11142	7541.2	65441	71171	63705	1.19588	7.85286	2.97322	up
		mws5035	C15H22N2O3	Leucylphenylalanine	40501	47167	44872	117770	113580	99867	1.19584	2.499	1.32135	up
		mws0629	C13H16N2O5	Asp-phe	11926	14864	13040	78420	75959	60864	1.1999	5.40404	2.43404	up
		pmn001728	C15H18N2O4	N-Acetyl-DL-tryptophan	9	9	9	11320	13187	12280	1.20895	1362.48	10.412	up
		pmb2857	C11H19NO9	L-Glutamic acid O-glycoside	35497	48417	50292	18250	22317	18904	1.15381	0.443132	-1.17419	down
		mws0636	C18H20N2O3	Phe-Phe	9	9	9	24953	17027	21033	1.20856	2333.81	11.1885	up
		pmb0464	C16H27NO14	Aspartic acid di-O-glucoside	598890	724510	634810	13735000	11580000	12275000	1.2074	19.1961	4.26274	up
Phenolic acids		mws2213	C9H8O2	Cinnamic acid	6703.8	6432.6	7146.2	2110.2	3667.3	2372.4	1.13649	0.401817	-1.31539	down
		mws0921	C9H10O2	p-Coumaryl alcohol	5786.1	8018	10125	19813	22691	26345	1.14556	2.87721	1.52467	up
		pmn001575	C7H6O4	Gentisic acid	126880	128690	167970	51729	42342	53092	1.18046	0.34746	-1.52508	down
		mws0885	C7H6O4	2,4-Dihydroxy benzoic acid	133030	129280	146700	59529	45751	41206	1.1802	0.358148	-1.48137	down
		pme1439	C9H8O3	p-Coumaric acid	22007	22105	18698	53222	53266	42247	1.18012	2.36801	1.24368	up
		pmb0142	C9H8O3	Caffeic aldehyde	130390	143710	151340	47109	54367	48220	1.20064	0.351862	-1.50692	down
		pme3083	C8H7NO3	2-(Formylamino)benzoic acid	62642	55799	62456	127420	137020	119980	1.19674	2.12508	1.08751	up
		pme2598	C8H8O4	3,4-Dihydroxybenzeneacetic acid	221490	241200	241660	542640	569940	511580	1.20263	2.3059	1.20533	up
		pme1292	C8H8O4	Homogentisic acid	277930	308840	369230	752790	769840	689230	1.18263	2.31366	1.21018	up
		mws1195	C10H10O3	Methyl p-coumarate	8358	10562	5743.3	145180	136300	145420	1.1997	17.3091	4.11346	up
		mws1200	C10H10O3	Trans-4-Hydroxycinnamic Acid Methyl Ester	10890	11375	9577.6	217460	221940	213150	1.20824	20.493	4.35706	up
		pmb2795	C10H10O3	4-Methoxycinnamic acid	5816.9	6627.6	6977.2	128140	124800	136380	1.2081	20.0456	4.32522	up
		mws1350	C9H10O4	Syringic Aldehyde	20832	35472	35336	66449	58735	62882	1.08839	2.05223	1.03719	up
		mws0014	C10H10O4	Ferulic acid	117740	154100	150240	331550	349390	375660	1.18517	2.50332	1.32384	up
		mws1354	C10H10O4	Trans-ferulic acid	151280	148140	150980	358530	456720	345410	1.18816	2.57695	1.36567	up
		mws1212	C11H12O4	Methyl ferulate	47298	56426	43632	313390	302990	311100	1.20477	6.29414	2.65401	up
		pmb2620	C11H12O4	3,4-Dimethoxycinnamic acid	28008	33642	30061	181070	180400	190250	1.20665	6.01585	2.58877	up
		Lmhn003240	C11H10O6	Benzoylmalic acid	118470	109770	130080	529920	605330	482490	1.20183	4.51479	2.17466	up
		pmn001320	C12H14O5	1-O-p-Cumaroylglycerol	9	9	9	92371	93511	107750	1.209	10875.3	13.4088	up
		pmn001669	C12H14O5	Methyl sinapate	9184.1	11388	7322.5	55099	58323	59888	1.19705	6.21303	2.6353	up
		pme0428	C12H14O5	3,4,5-Trimethoxycinnamic acid	4173.9	3617.2	3851.9	9	9	9	1.20891	0.00231899	-8.75229	down
		pmp000086	C13H16O6	1-Feruloyl-sn-glycerol	21205	20059	30884	83441	89576	72824	1.17583	3.40745	1.76869	up
		pmb3142	C13H16O8	Salicylic acid	9	9	9	1201200	1442100	774420	1.20837	126582	16.9497	up
		HmLn002358	C14H18O9	Vanillic acid-glucoside	338210	352210	358150	95177	81395	70302	1.20031	0.235439	-2.08658	down
		pmn001517	C15H22O8	3,4,5-Trimethoxyphenyl-β-D-Glucopyranoside	797100	814760	867470	209260	150370	151360	1.19737	0.2061	-2.27858	down
		pma6561	C15H18O9	Caffeic acid 3-glucoside	40125	41425	48499	110330	102410	102450	1.19684	2.42362	1.27717	up
		mws2108	C16H18O9	Cryptochlorogenic acid	3042200	2804600	3568100	1541400	1287800	1198100	1.17509	0.427758	-1.22513	down
		mws0178	C16H18O9	Chlorogenic acid	4487300	4782400	4785100	2544800	1528800	1555100	1.13908	0.400482	-1.32019	down
		pme1816	C16H18O9	Neochlorogenic acid(5-O-Caffeoylquinic acid)	5460500	6164500	6091000	2893300	2318000	1967400	1.17108	0.40521	-1.30326	down
		pmn001318	C21H20O7	1,3-O-Di-p-Coumaroyl glycerol	9	9	9	330790	332250	365440	1.20903	38091.9	15.2172	up
		pma0110	C18H22O10	O-Sinapoyl quinic acid	7566	5629	7621.8	9	9	9	1.20844	0.00129703	-9.59057	down
		pmn001319	C22H22O8	1-O-Feruloyl-3-O-p-Coumaroyl glycerol	12228	17428	16366	4057900	4094700	4107400	1.20808	266.394	8.05742	up
		pmp000091	C23H24O9	Glyceryl 1,3-diferulate	148460	171060	140390	3159700	2875800	3090600	1.20784	19.8432	4.31057	up
		pmf0424	C25H24O12	Isochlorogenic acid B	82674	94639	80986	11719	9416.2	9620.3	1.20534	0.119069	-3.07013	down
		pmn001612	C34H42O19	β-D-(3-Mustard acyl)-fructosyl-α-D-(6-mustard acyl)glucoside	8051.9	6559.4	3735.7	35306	32729	38817	1.17025	5.82395	2.542	up
		pme2292	C4H12N2	1,4-Diaminobutane	10458000	10265000	10443000	3068100	3089700	2764000	1.20711	0.286267	-1.80457	down
Nucleotides and derivatives		mws0255	C4H5N3O	Cytosine	67810	79796	59819	39497	27652	27699	1.13565	0.457264	-1.1289	down
		mws0572	C5H7N3O	5-Methylcytosine	9	9	9	4047.7	4335.3	3929.4	1.20897	456.015	8.83294	up
		mws0847	C6H7N5	1-Methyladenine	19157	14446	11974	76762	81301	66804	1.18888	4.93378	2.30269	up
		pme0183	C5H5N5O	2-Hydroxy-6-aminopurine	33137	37828	28508	102640	85118	87496	1.186	2.76712	1.46839	up
		pmc0274	C6H6N4S	6-Methylmercaptopurine	722890	794870	751430	7462000	7403700	6862900	1.20825	9.57549	3.25935	up
		pme1194	C9H13N3O4	Deoxycytidine	16057	16443	16741	75556	65253	63944	1.20548	4.15818	2.05595	up
		mws0863	C5H9NaO7P	2-Deoxyribose 5-phosphate	28815	34112	31011	7087.6	9405.9	16414	1.1003	0.350311	-1.51329	down
		pme0264	C10H14N2O5	Thymidine	12995	17348	15396	68613	75800	71170	1.2011	4.71333	2.23675	up
		pme3732	C9H13N3O5	Cytidine	366530	509400	369800	128530	66192	64402	1.15511	0.20801	-2.26528	down
		pme3961	C10H13N5O3	Deoxyadenosine	203830	214370	201440	942890	972630	941120	1.20849	4.61016	2.20482	up
		mws1715	C10H13N5O3	Cordycepin	9	9	9	12333	13189	11090	1.20889	1356	10.4051	up
		pme1184	C10H13N5O4	Deoxyguanosine	53029	55027	53037	604330	696160	586580	1.20778	11.7142	3.55018	up
		pme0230	C10H13N5O4	Adenosine	2765000	3167200	2993600	900530	1057200	924090	1.20169	0.322864	-1.631	down
		pme1178	C10H13N5O5	Guanosine	3528500	3664900	3681300	1718000	1702900	1548700	1.20425	0.456987	-1.12977	down
		mws0884	C10H12N5O6P	Cyclic AMP	92807	99984	100240	518260	544980	508750	1.20806	5.36459	2.42347	up
		pmb0981	C10H14N5O7P	Adenosine 5'-monophosphate	686540	448300	400360	2513300	2264500	2176200	1.1806	4.5297	2.17942	up
		pme2117	C10H15N5O10P2	Adenosine 5'-Diphosphate	7591.7	11936	12748	55794	73782	63789	1.1852	5.99104	2.58281	up
		pmb2922	C15H24N2O17P2	Uridine 5'-diphospho-D-glucose	789480	688570	855280	406320	350040	358610	1.18241	0.477845	-1.06539	down
		pme3200	C2H7N3	1-methylguanidine	30531	27254	14332	8969.9	6687.7	7375.8	1.10005	0.319389	-1.64661	down
Flavonoids		mws0183	C7H6O4	Protocatechuic acid	109630	97203	104320	9	9	9	1.209	8.6774e-05	-13.4924	down
		Lmzp004885	C17H14O7	Tricin	337390	343550	297940	700280	772310	889780	1.18839	2.41334	1.27103	up
		mws2118	C21H24O10	Phloretin 2'-O-glucoside	624410	624910	510710	1970500	2290900	1799600	1.19402	3.44369	1.78396	up
		mws0045	C21H20O11	Quercitrin	8261.1	8273.5	8670.5	147260	29725	23342	1.00201	7.94788	2.99057	up
		pmn001405	C21H20O11	Luteolin-7-O-glucoside	172670	233890	218160	9	9	9	1.20886	4.32194e-05	-14.498	down
		Lmlp003531	C21H20O11	Luteolin 3'-O-β-D-glucoside	9	9	9	132970	69150	62985	1.20737	9818.7	13.2613	up
		pmb0629	C22H22O11	Chrysoeriol 6-C-hexoside	9	9	9	29864	28702	31086	1.20903	3320.44	11.6972	up
		pmb3053	C27H24O11	Tricin O-eudesmic acid	799940	778350	710220	309040	318620	405010	1.17747	0.451241	-1.14803	down
		pmb0725	C33H32O15	Tricin 7-O-feruloylhexoside	9	2877.1	9	23386	31229	27381	1.02118	28.3223	4.82387	up
		pmb0738	C34H34O16	Tricin O-sinapoylhexoside	21619	31086	22221	103250	139540	139980	1.18797	5.10864	2.35294	up
		pmb2991	C33H40O19	Apigenin O-hexosyl-O-rutinoside	13285	16714	16292	31284	31296	35111	1.18111	2.11037	1.07749	up
		pmb0616	C32H38O20	C-Hexosyl-luteolin O-hexosyl-O-pentoside	23754	25452	25859	10283	13690	10563	1.17541	0.460081	-1.12004	down
		pmb0666	C38H40O19	6-C-Hexosyl-apigenin O-sinapoylhexoside	5114.1	6983.8	5668	18610	23262	20979	1.19035	3.53773	1.82282	up
Lignans and Coumarins		mws1075	C10H8O3	7-Methoxycoumarin	9	9	9	39790	42564	41198	1.20903	4576	12.1599	up
		pmb0382	C19H14O6	O-Feruloyl 4-hydroxylcoumarin	263320	296500	264840	65705	125510	77979	1.14457	0.32643	-1.61515	down
		pmb3093	C16H16O9	6,7-dihydroxycoumarin 7-O-quinic acid	585290	590300	613190	243830	163920	135200	1.16324	0.303531	-1.72008	down
		mws1077	C16H18O9	Scopolin	51592	62069	39217	9630.5	12016	4991.3	1.14915	0.174242	-2.52083	down
		pmn001502	C21H24O7	Medioresinol	9	9	9	3654.7	6623.9	3755.2	1.20661	519.77	9.02173	up
		pmn001494	C22H26O8	(+)-Syringaresinol	6238.2	5361.6	4984.9	26681	25892	25865	1.20463	4.72954	2.2417	up
		Rfmb26203	C28H36O13	Syringaresinol-Hex	1370700	1423800	1319900	3870600	3588700	3676000	1.20658	2.70642	1.43639	up
		Rfmb056	C29H36O13	(+)-Medioresinol-acetylglucoside	6823.1	12563	13494	49684	46889	45967	1.16146	4.33514	2.11608	up
		Rfmb26201	C30H38O14	Syringaresinol-aceGlu	14231	17684	15266	592810	608690	608550	1.20823	38.364	5.26168	up
Alkaloids		pmb1096	C8H7N	Indole	14498	11147	13808	94645	86206	79300	1.20294	6.59395	2.72114	up
		mws0191	C5H11NO2	Betaine	1951800	1769400	2246200	5707400	6660000	4438600	1.16779	2.8163	1.4938	up
		pmp001287	C8H9N	N-Benzylmethylene isomethylamine	2287200	2486200	2409300	24752000	25115000	23358000	1.20848	10.1946	3.34974	up
		pme2693	C6H14N2O	N-Acetylputrescine	291090	315590	259450	1052100	900790	870580	1.19745	3.25987	1.70481	up
		pmb0501	C5H14N4	Agmatine	299000	279890	265220	877370	889890	828150	1.20574	3.07473	1.62046	up
		pma3649	C5H9NO3	5-Aminolevulinate	5206700	7939200	6892200	46099000	38743000	41577000	1.19646	6.30893	2.6574	up
		pmb0374	C5H5N5	Aminopurine	139360	160900	146230	44794	43257	42033	1.20584	0.291348	-1.77918	down
		mws0146	C7H7NO2	Nicotinic Acid Methyl Ester(Methyl Nicotinate)	9	9	9	15601	19414	10045	1.20725	1668.89	10.7047	up
		mws0017	C7H19N3	Spermidine	581230	828860	441210	221290	117030	110600	1.123	0.242489	-2.04401	down
		pmb0819	C10H8N2	3-Indoleacetonitrile	207020	203120	200760	702780	638820	699290	1.20738	3.34079	1.74019	up
		mws0005	C10H12N2	Tryptamine	251860	292800	272720	3590900	3636000	3104800	1.20722	12.64	3.65993	up
		mws1346	C6H11NO4	DL-2-Aminoadipic acid	95518	129550	81964	781950	650610	688880	1.19561	6.90951	2.78858	up
		pme2024	C10H12N2O	Serotonin	219630	281970	219790	2028200	2158500	2133400	1.20523	8.761	3.1311	up
		pmb1754	C5H15NO4P+	O-Phosphocholine	372450	360510	208550	9	9	9	1.20828	2.86773e-05	-15.0897	down
		mws0597	C10H9NO3	5-Hydroxyindole-3-acetic acid	132420	141030	146880	66846	60387	62867	1.20228	0.452264	-1.14476	down
		pmb0818	C11H11NO3	Methoxyindoleacetic acid	427980	503510	426260	2791700	2700100	2529600	1.20593	5.90786	2.56264	up
		mws0677	C12H14N2O2	N-Acetyl-5-hydroxytryptamine	102050	126520	99203	384350	402250	370450	1.19914	3.53003	1.81968	up
		pmb0896	C14H20N2O3	N'-Feruloyl putrescine	133220	134940	119220	40014	40403	31392	1.19664	0.288629	-1.79271	down
		mws1433	C18H19NO4	N-Feruloyltyramine	9	9	9	15355	8726.3	7151.1	1.20635	1156.76	10.1759	up
		pmb0776	C20H20N2O3	N-Feruloyl tryptamine	9	9	9	21453	22146	19795	1.20898	2347.93	11.1972	up
		pmb0770	C20H20N2O4	N-Feruloyl serotonin	9	5607	9	368240	377100	401730	1.07895	203.924	7.67188	up
		pmb0782	C5H11N	Piperidine	1889800	1919100	1853100	9462400	10643000	8490100	1.20483	5.05042	2.3364	up
Organic acids		mws0574	C4H8O3	α-Hydroxyisobutyric acid	16167	15854	23433	9	9	9	1.20834	0.00048689	-11.0041	down
		mws0376	C4H4O4	Fumaric acid	89262	93583	105790	325190	344110	347240	1.20461	3.52189	1.81635	up
		mws0192	C4H6O4	Succinic acid	20337000	22700000	23114000	9	9	9	1.20903	4.08157e-07	-21.2244	down
		mws0470	C4H6O4	Methylmalonic acid	28104000	29056000	29122000	9	9	9	1.20904	3.12927e-07	-21.6077	down
		pme3096	C3H5NO4	Aminomalonic acid	946740	1016400	967830	253060	233050	318880	1.19574	0.27465	-1.86434	down
		mws0671	C4H9NO3	L-Homoserine	1551700	1396100	1879300	259360	259350	172630	1.19313	0.143221	-2.80369	down
		mws0425	C5H6O4	Citraconic acid	367200	525600	549110	1704900	1719900	1505300	1.18137	3.41915	1.77364	up
		pme0274	C6H13NO2	6-Aminocaproic acid	153740	276880	264830	1671400	1332000	1596200	1.1831	6.61385	2.72549	up
		mws0275	C4H6O5	L-(-)-Malic acid	383620	375530	393280	1166200	1095000	1176100	1.20775	2.98265	1.5766	up
		mws0336	C6H6N2O2	UROCANIC ACID(RG)	96325	92549	102440	43130	40536	30210	1.17628	0.390905	-1.35511	down
		pme3207	C6H6O4	Trans,trans-Muconic acid	6339800	5923100	6096500	22880000	24328000	25306000	1.20756	3.94969	1.98174	up
		pme0295	C6H11NO3	4-Acetamidobutyric acid	73486	75081	81977	189800	143330	168270	1.1789	2.17486	1.12092	up
		pme2380	C5H6O5	A-Ketoglutaric acid	1269900	1295100	1383400	297570	324210	347510	1.20563	0.245489	-2.02627	down
		mws0924	C6H10O4	2-Methylglutaric acid	68550	64398	83604	289480	255270	292640	1.19875	3.86692	1.95119	up
		pme3154	C6H12O4	(Rs)-Mevalonic acid	9	9	9	456640	512360	497160	1.20902	54302.2	15.7287	up
		mws0596	C7H7NO3	3-Hydroxyanthranilic acid	8931.5	14025	17850	33313	36855	34659	1.11554	2.56888	1.36114	up
		mws0639	C7H6O4	2,3-Dihydroxybenzoic Acid	89181	95186	90538	43504	35683	36800	1.19599	0.421917	-1.24497	down
		pme2550	C6H6O6	Cis-Aconitic acid	471850	517810	650010	178270	208900	191330	1.18456	0.352815	-1.50302	down
		mws0154	C7H10O5	Shikimic acid	1530600	1414300	1302400	573320	530060	540280	1.20179	0.386989	-1.36963	down
		mws0281	C6H8O7	Citric Acid	5094700	5353700	5501600	12114000	10214000	10998000	1.19604	2.0894	1.06309	up
		mws0277	C7H12O6	Kinic acid	2540100	2635400	2393900	8051000	7567500	8266300	1.20638	3.15544	1.65784	up
		mws1213	C6H10O7	Aldehydo-D-galacturonate	10911	13491	17690	36984	32940	45742	1.14778	2.74793	1.45835	up
		pme1654	C12H18O3	(+)-Jasmonic acid	110360	135760	134140	49027	50272	48335	1.19677	0.388245	-1.36496	down
		pmb2657	C10H18N4O6	Argininosuccinic acid	264830	105680	220210	42519	37692	48800	1.12219	0.218396	-2.19498	down
Lipids		pmb2640	C12H24O2	Lauric acid	28084	29344	26684	70982	74196	68578	1.20533	2.54133	1.34558	up
		pmb0128	C13H24O2	δ-Tridecalactone	5341.1	5339.7	7896.4	14020	14119	11230	1.12456	2.11921	1.08353	up
		mws0359	C15H30O2	Pentadecanoic Acid	15912	24854	19305	48805	38691	43372	1.13425	2.17856	1.12337	up
		pmb1574	C18H28O2	Octadecadien-6-ynoic acid	9478.2	11863	12299	4294.7	5397.1	5283.1	1.16704	0.445149	-1.16764	down
		pmb0889	C18H30O2	Punicic acid	87369	93496	86187	318700	339990	319540	1.20739	3.66307	1.87305	up
		mws2623	C18H34O2	11-Octadecanoic acid(Vaccenic acid)	212260	220850	197120	537460	437200	490590	1.19331	2.32494	1.2172	up
		mws1489	C18H36O2	Stearic Acid	5501700	6483400	5351300	14813000	15271000	14948000	1.19928	2.59754	1.37715	up
		pmb2786	C18H30O3	9-HOTrE	26404	29170	26469	71638	74310	65973	1.20258	2.58305	1.36907	up
		Rfmb090	C18H32O3	13-Hydroxy-9,11-octadecadienoic acid	57911	61667	60182	241430	246910	216830	1.20635	3.92284	1.9719	up
		Rfmb091	C18H32O3	9-Hydroxy-10,12-octadecadienoic acid	61294	67486	63554	236150	242690	229270	1.20742	3.68167	1.88036	up
		pmb2778	C18H32O3	9,10-EODE	145960	155130	157590	629720	653450	580790	1.20675	4.06375	2.02281	up
		pmn001610	C20H36O2	Eicosadienoic acid	17932	12363	13601	62442	59864	49347	1.18686	3.91045	1.96733	up
		pmn001606	C20H38O2	Eicosenoic acid	3330.1	7686	7004.9	19948	13491	21507	1.07229	3.049	1.60834	up
		pmn001689	C18H32O4	9-Hydroxy-12-oxo-10-octadecenoic acid	6402.8	7545.8	6912.4	22859	25391	20191	1.19742	3.28081	1.71405	up
		pmb0890	C21H38O4	MAG(18:2)	273220	268610	228950	97695	98187	94580	1.20082	0.376842	-1.40797	down
		pmp001283	C21H38O4	Glyceryl linoleate	5345.1	5597.4	4612.7	21534	22618	24912	1.20343	4.43993	2.15054	up
		pmb0164	C21H38O4	MAG(18:2)isomer1	1369.3	1073.1	978.95	7539.2	9990.2	9403.6	1.19943	7.87204	2.97674	up
		pmb2363	C21H40O4	MAG(18:1)isomer1	63737	60905	60159	22240	21194	26083	1.1982	0.376172	-1.41053	down
		pmb0864	C19H40NO7P	LysoPE 14:0	31194	35431	32036	70420	70742	65892	1.1999	2.09864	1.06946	up
		pmd0130	C22H46NO7P	LysoPC 14:0(2n isomer)	16775	18585	17909	61282	66085	58045	1.20527	3.48067	1.79937	up
		pmb2260	C23H46NO7P	LysoPC 15:1	7558.3	7095.9	7594.4	17261	19907	14926	1.18439	2.34145	1.2274	up
		pmb2319	C23H48NO7P	LysoPC 15:0	75973	80673	77467	637230	648720	587790	1.20825	8.00357	3.00064	up
		pmb2406	C25H52NO7P	LysoPC 17:0	17020	17549	16810	41884	43030	39181	1.20593	2.41529	1.27219	up
		pmc0960	C28H50NO7P	LysoPC 20:4	326340	314500	322800	87572	84724	86018	1.20872	0.268061	-1.89937	down
		pmd0147	C28H54NO7P	LysoPC 20:2	50402	80324	73940	17966	20708	16381	1.17479	0.268999	-1.89433	down
		pmd0143	C28H58NO7P	LysoPC 20:0	4074.5	3738.9	4461.7	39261	41137	33716	1.20596	9.29638	3.21667	up
		pmp001276	C33H56O14	2,3-Dihydroxypropyl-9,12,15-octadecatrienoate-hexose-hexose	149590	134150	120030	302020	313250	270230	1.18598	2.19308	1.13296	up
Others		mws4052	C4H7NO2	1-Aminocyclopropane-1-carboxylic acid	92331	85858	96943	13837	10014	17805	1.18993	0.151404	-2.72353	down
		pme2433	C4H11NO2	Diethanolamine	67894	41615	13842	9731.5	6595.4	7358.9	1.0103	0.19202	-2.38068	down
		mws0601	C5H5NO2	Pyrrole-2-carboxylic acid	6467.2	5603.7	8372.7	16542	14649	16511	1.162	2.33335	1.2224	up
		pma0134	C4H8O4	D(-)-Threose	8368.5	6718.9	6383.7	21744	19955	14031	1.14616	2.59558	1.37606	up
		pmb0069	C7H7NO	Benzamide	8107.9	9891.6	10082	2010600	2109100	1689600	1.20816	206.873	7.6926	up
		mws0491	C8H11N	Phenethylamine	32003	28589	35663	7396800	6649300	6361400	1.20854	212.015	7.72802	up
		mws0133	C6H6N2O	Nicotinamide	581300	596480	560310	266250	227340	218330	1.19744	0.409599	-1.28772	down
		pma0948	C8H11NO	Hydroxyphenethylamine	101630	99222	85313	206820	223210	189990	1.18836	2.16665	1.11547	up
		pme3351	C6H11NO3	Allysine(6-Oxo DL-Norleucine)	5522.8	8364.1	7753.8	35018	36549	34205	1.19343	4.88764	2.28914	up
		pme3081	C8H12N2O2	4-(Aminomethyl)-5-(hydroxymethyl)-2-methylpyridin-3-ol	80456	88464	57019	47836	31460	30135	1.06275	0.484339	-1.04591	down
		Hmfn00531	C6H8O6	L-Ascorbic acid	28830000	31016000	30407000	13849000	14313000	13435000	1.20595	0.460893	-1.1175	down
		pmb0774	C10H12N2O	N-Hydroxy tryptamine	258290	316270	288190	2379900	2465800	2306000	1.20688	8.28942	3.05127	up
		pme2596	C8H9NO4	4-Pyridoxic acid	259800	282710	273910	627950	651230	551870	1.19717	2.24278	1.16529	up
		Hmln002597	C10H9NaO4	Sodium ferulate	9	9	9	16040	13946	15007	1.20897	1666.41	10.7025	up
		pmb3081	C6H11PO11	Glucarate O-Phosphoric acid	883960	1045500	714090	315320	324610	304450	1.18122	0.357239	-1.48504	down
		pme3163	C7H15O10P	D-Sedoheptuiose 7-phosphate	459810	1176100	554330	251230	247640	158630	1.05169	0.300195	-1.73603	down
		mws0983	C20H39NO2	N-Oleoylethanolamine	10318	10844	10873	39918	40074	35081	1.2056	3.5921	1.84483	up
		Zmhn001375	C14H18O9	Vanillic acid-C-glucoside	794080	853040	884010	137760	161220	151470	1.20655	0.177964	-2.49034	down
		mws4108	C21H20O5	1-Methoxyphaseollin	7851.6	7856.5	7435.7	15052	14449	16878	1.19695	2.00395	1.00285	up
		mws5040	C12H21O11Na	Turanose	1107500	1230200	1413900	5922500	7050000	5619800	1.19985	4.95583	2.30913	up
		pmb0064	C15H19NO10	DIMBOA glucoside	32184	27591	26654	182300	122860	108310	1.18135	4.78393	2.2582	up
		mws0232	C17H20N4O6	Riboflavin	925410	820220	805270	170080	170500	170310	1.20723	0.200278	-2.31992	down
		pma6625	C20H22O9	E-3,4,5'-Trihydroxy-3'-glucopyranosylstilbene	159930	181990	181940	13791	21383	16006	1.20108	0.0976979	-3.35553	down
		pme0500	C18H32O16	D-(+)-Melezitose	14739	27574	37395	13130	8026.6	6371.2	1.00615	0.345358	-1.53384	down
		pmb2653	C24H42O20	D(+)-Melezitose O-rhamnoside	51502	67330	73082	16056	12794	11195	1.18803	0.208661	-2.26077	down
		pme3005	C3H7NO	N,N-Dimethylformamide	103620	87217	96393	49486	58521	28523	1.05259	0.475333	-1.07299	down
