# Supplementary material for: Metabolome and Transcriptome Analyses Reveal the Differences in the Molecular Mechanisms of Oat Leaves Responding to Salt and Alkali Stress Conditions
Source: MDPI journal article supplement (doi:10.3390/agronomy13061441), 2023-05-23
Supplement: s1 [file s1 › Supplementary Table S7.xlsx]

## Sheet: Sheet1
Supplementary Table S7 The differentially expressed metabolites in oat leaves at SS vs Ck
Class		Index	Formula	Compounds	CKL-1	CKL-2	CKL-3	YL-1	YL-2	YL-3	VIP	Fold_Change	Log2FC	Type
Amino acids and derivatives		mws0890	C3H7NO3	D-Serine	60116	55501	48821	23105	24757	25910	1.15339	0.448631	-1.1564	down
		pme0006	C5H9NO2	L-Proline	5267400	5757200	5263900	67011000	60366000	46124000	1.16614	10.6517	3.41302	up
		mws0256	C5H11NO2	L-Valine	2221200	2299400	2252400	5948900	5265600	4898100	1.16166	2.37895	1.25032	up
		pme2634	C5H11NO2	DL-Norvaline	2372800	2638200	2512700	6962700	6012800	5797600	1.16055	2.4952	1.31915	up
		mws0230	C4H9NO3	L-(-)-Threonine	1704100	1561500	2369100	236140	236440	452540	1.13169	0.164183	-2.60663	down
		pme0195	C3H7NO2S	L-Cysteine	736380	751330	900180	5313100	5339600	5587800	1.1678	6.80119	2.76579	up
		mws1587	C6H13NO2	α-Aminocaproic acid	63980	74290	66164	164600	157890	155240	1.16405	2.33684	1.22456	up
		mws0001	C4H8N2O3	L-Asparagine Anhydrous	2104600	3490200	1994800	391820	201790	132900	1.11969	0.0957244	-3.38497	down
		pme2527	C5H12N2O2	L-Ornithine	146490	150470	174880	14290	18315	22182	1.16273	0.116114	-3.10639	down
		mws0219	C4H7NO4	L-AsparticAcid	2914100	3037000	3248900	1383900	1585700	1469100	1.16116	0.482467	-1.0515	down
		pmf0588	C4H7NO4	Aspartic acid	636250	499910	475920	200670	157690	169850	1.14552	0.327657	-1.60974	down
		pme0193	C5H10N2O3	L-Glutamine	4664800	4462000	3540300	1382000	825450	1071800	1.13386	0.258879	-1.94965	down
		pme0026	C6H14N2O2	L-(+)-Lysine	4577200	4137600	5180600	1261900	1002400	1723800	1.13222	0.287009	-1.80083	down
		pme0014	C5H9NO4	L-Glutamic acid	8907700	8177000	8397100	952030	1305400	1043400	1.16623	0.129537	-2.94857	down
		mws1050	C5H9NO4	O-Acetylserine	308760	317180	320340	66968	47126	62230	1.1614	0.186334	-2.42404	down
		pme1210	C5H11NO2S	L-Methionine	888070	901850	827910	2706000	2206000	2013600	1.15228	2.64555	1.40357	up
		pme0021	C9H11NO2	L-Phenylalanine	5976500	6703700	6060400	40656000	39713000	37225000	1.16999	6.27483	2.64958	up
		pme0253	C8H15NO3	N-Acetyl-L-leucine	35696	32331	27477	94395	79191	80064	1.15146	2.65591	1.40921	up
		mws0260	C6H14N4O2	L-(+)-Arginine	179530	321280	314420	1544700	1341600	1087000	1.13072	4.87384	2.28506	up
		pme2559	C6H9NO5	N-Acetylaspartate	9	9	9	65990	57525	62299	1.17112	6882	12.7486	up
		pme0008	C6H13N3O3	L-Citrulline	263260	276740	195200	645730	515620	466540	1.10361	2.21421	1.14679	up
		pmb0468	C6H11NO3S	N-formylmethionine	11290	11347	10177	71296	70424	57058	1.16709	6.05772	2.59877	up
		mws0250	C9H11NO3	L-(-)-Tyrosine	619080	597440	554500	1768500	1385400	1323000	1.14831	2.52787	1.33792	up
		pme0075	C7H11NO5	N-Acetyl-L-glutamic acid	356250	318320	412450	82444	79785	62035	1.15862	0.206311	-2.27711	down
		pmb2561	C7H13NO3S	N-Acetylmethionine	9	9	9	14340	13085	17053	1.17083	1647.33	10.6859	up
		mws5037	C9H18N2O3	Alanylleucine	195630	229950	192420	95864	86211	78867	1.15013	0.422236	-1.24388	down
		mws0282	C11H12N2O2	L-Tryptophan	311970	284170	309800	1002800	1025900	928250	1.16809	3.26396	1.70662	up
		pme0170	C8H16N4O3	N-α-Acetyl-L-arginine	267110	327910	248910	159820	123860	92155	1.07149	0.445339	-1.16702	down
		pme1228	C11H12N2O3	5-Hydroxy-L-tryptophan	42413	55358	44509	180910	159470	143560	1.15504	3.40132	1.7661	up
		pmb0962	C10H22N2O4	Lysine butyrate	2747100	2523700	2744100	22555000	21837000	14469000	1.15912	7.34395	2.87656	up
		mws4176	C12H16N2O3	DL-Alanyl-DL-phenylalanine	12024	7261.4	8562.2	39231	39849	32099	1.1411	3.99241	1.99726	up
		mws0629	C13H16N2O5	Asp-phe	11926	14864	13040	45249	38623	34280	1.15161	2.96641	1.56872	up
		mws0636	C18H20N2O3	Phe-Phe	9	9	9	17600	19320	17252	1.17107	2006.37	10.9704	up
		pme2735	C15H22N6O5S	S-Adenosylmethionine	254140	252830	228430	114110	99419	84274	1.14514	0.404954	-1.30417	down
		pmb0464	C16H27NO14	Aspartic acid di-O-glucoside	598890	724510	634810	20087000	19670000	14869000	1.16876	27.8959	4.80198	up
Phenolic acids		pme0241	C7H6O2	Benzoic acid	9659.9	10671	9644.2	22866	19200	22712	1.15479	2.16106	1.11174	up
		mws1078	C7H7NO2	Anthranilic Acid	27842	34804	37729	12197	9924.7	7862.1	1.13402	0.298718	-1.74314	down
		pmn001575	C7H6O4	Gentisic acid	126880	128690	167970	43646	50219	32952	1.13584	0.299422	-1.73975	down
		mws0885	C7H6O4	2,4-Dihydroxy benzoic acid	133030	129280	146700	47532	55118	43719	1.15856	0.357862	-1.48253	down
		mws1195	C10H10O3	Methyl p-coumarate	8358	10562	5743.3	86253	87343	86386	1.15938	10.5412	3.39797	up
		mws1200	C10H10O3	Trans-4-Hydroxycinnamic Acid Methyl Ester	10890	11375	9577.6	128950	127530	119610	1.17029	11.8109	3.56205	up
		pmb2795	C10H10O3	4-Methoxycinnamic acid	5816.9	6627.6	6977.2	77741	76475	70544	1.16949	11.5726	3.53264	up
		mws2212	C9H8O4	Caffeic acid	6830.7	3507.9	3929.2	15015	14271	19687	1.10203	3.43241	1.77922	up
		mws0014	C10H10O4	Ferulic acid	117740	154100	150240	392260	336460	308320	1.13741	2.45697	1.29688	up
		mws1354	C10H10O4	Trans-ferulic acid	151280	148140	150980	377390	375170	347830	1.16918	2.44314	1.28874	up
		mws1212	C11H12O4	Methyl ferulate	47298	56426	43632	173300	172240	177240	1.16336	3.54773	1.8269	up
		pmb2620	C11H12O4	3,4-Dimethoxycinnamic acid	28008	33642	30061	98748	99916	107500	1.16531	3.33836	1.73914	up
		pme3443	C11H12O4	Sinapinaldehyde	73233	75854	73745	34316	37368	28991	1.15045	0.451798	-1.14625	down
		mws4085	C11H12O5	Sinapic acid	18815	24208	21523	45188	40360	55015	1.12129	2.17772	1.12282	up
		pmb0505	C13H18N2O2	N-p-Coumaroylputrescine	19051	20564	16386	7137.1	4429.2	3458.7	1.11019	0.268299	-1.89809	down
		pmn001320	C12H14O5	1-O-p-Cumaroylglycerol	9	9	9	342960	320960	275310	1.1711	34786.3	15.0862	up
		pmn001669	C12H14O5	Methyl sinapate	9184.1	11388	7322.5	27144	27447	27081	1.14179	2.92788	1.54986	up
		pmp000086	C13H16O6	1-Feruloyl-sn-glycerol	21205	20059	30884	239920	225710	183420	1.15877	8.99609	3.1693	up
		pmb3142	C13H16O8	Salicylic acid	9	9	9	780460	758910	730400	1.17114	84065.6	16.3592	up
		pmb2871	C13H16O9	2,5-Dihydroxy benzoic acid O-hexside	3679600	3978100	4376300	1798100	1646900	1499000	1.15593	0.410836	-1.28337	down
		pmn001367	C13H16O9	Protocatechuic acid-4-glucoside	3531400	4268800	4103200	1927700	1646400	1576600	1.14773	0.432708	-1.20853	down
		pmb3075	C16H16O7	3-O-p-Coumaroylshikimic acid	32420	39084	32207	9521	8143.3	5765.3	1.14382	0.225912	-2.14616	down
		pmb0751	C16H16O7	Trans-5-O-(4-Coumaroyl)shikimate	185410	171390	155070	39089	29153	24570	1.15349	0.181319	-2.46339	down
		Lmtn002565	C14H18O9	1'-O-Vanilloyl-β-D-glucoside	202940	231190	230790	101910	104160	95443	1.16193	0.453458	-1.14096	down
		HmLn002358	C14H18O9	Vanillic acid-glucoside	338210	352210	358150	60555	56238	62610	1.17025	0.171093	-2.54715	down
		pmn001517	C15H22O8	3,4,5-Trimethoxyphenyl-β-D-Glucopyranoside	797100	814760	867470	138130	133240	181060	1.16379	0.182481	-2.45418	down
		pmb2928	C13H16O10	Gallic acid 4-O-glucoside	511800	597030	561280	250210	216290	184510	1.14559	0.389801	-1.35919	down
		pmp000232	C16H18O8	Cis-3-p-coumaric quinic acid	19200000	22523000	19780000	10142000	8246500	8249700	1.14678	0.43312	-1.20716	down
		pma6460	C16H18O8	5-O-p-Coumaroylquinic acid	18599000	20127000	21834000	9455700	9200900	8909600	1.16252	0.455188	-1.13546	down
		pma6561	C15H18O9	Caffeic acid 3-glucoside	40125	41425	48499	144190	138360	137500	1.16439	3.22994	1.69151	up
		mws2108	C16H18O9	Cryptochlorogenic acid	3042200	2804600	3568100	1197300	1096600	955370	1.15253	0.34512	-1.53483	down
		mws0178	C16H18O9	Chlorogenic acid	4487300	4782400	4785100	1718400	1449100	1310600	1.15873	0.318617	-1.6501	down
		pme1816	C16H18O9	Neochlorogenic acid(5-O-Caffeoylquinic acid)	5460500	6164500	6091000	1787200	1938800	1798500	1.16776	0.311837	-1.68114	down
		Zmhn002422	C16H20O9	Feruloyl glucose	1176300	1251100	1372700	573420	535740	511870	1.1615	0.426576	-1.22913	down
		pmb0752	C17H20O9	3-O-Feruloyl quinic acid	23458000	24555000	21632000	10756000	7858800	8788200	1.14435	0.393467	-1.34569	down
		pma3724	C17H20O9	1-O-Feruloyl quinic acid	14672000	15201000	14859000	7197700	5923300	5526200	1.15125	0.416865	-1.26235	down
		pmb0108	C19H18O8	Feruloyl syringic acid	344030	365440	354920	157270	116880	112790	1.14513	0.363532	-1.45985	down
		pmn001318	C21H20O7	1,3-O-Di-p-Coumaroyl glycerol	9	9	9	1234300	1120800	1111500	1.17115	128393	16.9702	up
		pmn001319	C22H22O8	1-O-Feruloyl-3-O-p-Coumaroyl glycerol	12228	17428	16366	7960200	7141600	7274400	1.17029	486.207	8.92543	up
		pmp000091	C23H24O9	Glyceryl 1,3-diferulate	148460	171060	140390	4840800	5017500	5038200	1.17056	32.39	5.01748	up
		mws1584	C25H24O12	Cynarin	29007	29745	28945	73758	69857	66923	1.16895	2.40074	1.26348	up
		pmf0424	C25H24O12	Isochlorogenic acid B	82674	94639	80986	11116	9400.9	6336.9	1.15694	0.103964	-3.26584	down
		pmn001710	C24H26O13	Rosmarinyl Glucoside	206990	196170	174460	477680	371580	452250	1.14387	2.25323	1.17199	up
		pmb2833	C23H30O14	3-O-Feruloyl quinic acid glucoside	108790	113780	113770	36576	38422	40949	1.16894	0.344732	-1.53645	down
		pmb2554	C23H30O14	5-O-Feruloyl quinic acid glucoside	118460	121450	122860	46159	32066	34551	1.14974	0.310875	-1.6856	down
		pmb2936	C28H32O14	Disinapoyl hexoside	64811	69376	72550	23476	21495	25442	1.1647	0.340592	-1.55388	down
		pmn001612	C34H42O19	β-D-(3-Mustard acyl)-fructosyl-α-D-(6-mustard acyl)glucoside	8051.9	6559.4	3735.7	25225	22644	21736	1.11197	3.79381	1.92365	up
		pme2292	C4H12N2	1,4-Diaminobutane	10458000	10265000	10443000	2087600	2337500	2157900	1.1702	0.211224	-2.24316	down
Nucleotides and derivatives		mws0255	C4H5N3O	Cytosine	67810	79796	59819	38284	33528	25126	1.08845	0.46734	-1.09746	down
		pme1173	C5H4N4O	Allopurinol	34534	37251	38736	15675	15349	11381	1.14213	0.383683	-1.38201	down
		mws0847	C6H7N5	1-Methyladenine	19157	14446	11974	55846	38432	35767	1.1012	2.8533	1.51263	up
		pme0256	C5H4N4O2	Xanthine	6014.7	3423.6	8804.3	9	9	9	1.1674	0.00148005	-9.40014	down
		pme3968	C6H7N5O	7-Methylguanine	4875.7	4536.8	5113.4	9	9	9	1.17112	0.00185875	-9.07145	down
		pmc0274	C6H6N4S	6-Methylmercaptopurine	722890	794870	751430	6127500	5336400	4909000	1.16858	7.21531	2.85106	up
		pme0264	C10H14N2O5	Thymidine	12995	17348	15396	74887	52457	54171	1.14793	3.9685	1.98859	up
		pme3732	C9H13N3O5	Cytidine	366530	509400	369800	151890	139150	125040	1.1415	0.334005	-1.58206	down
		pme3961	C10H13N5O3	Deoxyadenosine	203830	214370	201440	927700	927620	793070	1.1681	4.27408	2.09561	up
		mws1715	C10H13N5O3	Cordycepin	9	9	9	12805	13022	10697	1.17101	1352.74	10.4017	up
		pme1184	C10H13N5O4	Deoxyguanosine	53029	55027	53037	313790	276070	245440	1.16721	5.1852	2.3744	up
		pme0230	C10H13N5O4	Adenosine	2765000	3167200	2993600	1443400	1388800	1354600	1.16327	0.469067	-1.09213	down
		mws1060	C10H12N4O5	9-(β-D-Arabinofuranosyl)hypoxanthine	844060	918650	831150	371450	338130	337260	1.1648	0.403584	-1.30906	down
		mws0724	C10H13N5O6	8-Hydroxyguanosine	9	9	9	6580.4	11679	9347.8	1.16949	1022.49	9.99787	up
		mws0884	C10H12N5O6P	Cyclic AMP	92807	99984	100240	514170	418530	413150	1.16588	4.59286	2.19939	up
		pmb0981	C10H14N5O7P	Adenosine 5'-monophosphate	686540	448300	400360	1322200	1060200	1032900	1.07385	2.22466	1.15359	up
		pmb2922	C15H24N2O17P2	Uridine 5'-diphospho-D-glucose	789480	688570	855280	317270	347900	252330	1.13798	0.393215	-1.34661	down
		pme3200	C2H7N3	1-methylguanidine	30531	27254	14332	5890.8	4873.8	6575.3	1.09821	0.240441	-2.05624	down
Flavonols		mws0183	C7H6O4	Protocatechuic acid	109630	97203	104320	9	9	9	1.1711	8.6774e-05	-13.4924	down
		mws0914	C15H12O5	Pinobanksin	10780	9545.3	12807	4444.2	6790.6	5225.7	1.08108	0.496811	-1.00923	down
		pme3475	C15H12O5	Butin	5831.7	5498	4188.4	9	9	9	1.17028	0.0017399	-9.16678	down
		pmb3894	C17H14O7	Di-O-methylquercetin	48611	52598	53134	123750	114480	107940	1.163	2.24286	1.16534	up
		pma6389	C18H16O7	Ayanin	60862	77634	72305	29524	28090	32304	1.14988	0.426554	-1.2292	down
		pmb3031	C20H20O9	Tricin O-glycerol	666010	648420	617330	270310	267220	254750	1.16815	0.410134	-1.28583	down
		pmp000117	C22H24O9	3,5,6,7,8,3′,4′-Heptamethoxyflavone	5212.5	6857.6	8159.7	2797.4	3717.3	2224.2	1.06233	0.431982	-1.21096	down
		pmb0744	C24H18O8	Tricin O-phenylformic acid	103290	100170	96253	25037	24723	21686	1.16779	0.238381	-2.06866	down
		mws2118	C21H24O10	Phloretin 2'-O-glucoside	624410	624910	510710	1617200	1660900	1610800	1.16199	2.77774	1.47391	up
		mws0045	C21H20O11	Quercitrin	8261.1	8273.5	8670.5	24894	21079	24042	1.16494	2.77781	1.47395	up
		pmn001405	C21H20O11	Luteolin-7-O-glucoside	172670	233890	218160	9	9	9	1.17098	4.32194e-05	-14.498	down
		Lmlp003531	C21H20O11	Luteolin 3'-O-β-D-glucoside	9	9	9	51163	45387	44691	1.17113	5231.15	12.3529	up
		pmb3023	C21H22O11	Eriodictyol C-hexoside	165450	129560	158240	74760	69491	68745	1.14558	0.469931	-1.08948	down
		mws1361	C21H22O11	Astilbin	26633	28271	24147	55617	48792	58195	1.1506	2.05695	1.04051	up
		pmb0629	C22H22O11	Chrysoeriol 6-C-hexoside	9	9	9	22364	12004	26707	1.16886	2262.04	11.1434	up
		pmb1466	C26H22O11	Tricin 4'-O-syringic acid	14370	14748	12728	5688.2	5723.9	5876.1	1.16402	0.413139	-1.2753	down
		pmb3041	C23H22O14	Tricin O-saccharic acid	415760	411260	387820	135140	132600	135340	1.16982	0.331797	-1.59163	down
		pmb3053	C27H24O11	Tricin O-eudesmic acid	799940	778350	710220	185090	156940	154170	1.16564	0.216822	-2.20541	down
		pmb0717	C27H26O11	Tricin 5-O-β-guaiacylglycerol	605260	723800	654740	343420	281080	362320	1.13175	0.497439	-1.00741	down
		pmb0738	C34H34O16	Tricin O-sinapoylhexoside	21619	31086	22221	160380	150580	110510	1.15162	5.62515	2.49189	up
		pmb3039	C35H28O16	Tricin O-oxalic acid O-coumaroyl shikimic acid	138500	145420	125930	53005	42695	42812	1.15632	0.337958	-1.56509	down
		pmb2991	C33H40O19	Apigenin O-hexosyl-O-rutinoside	13285	16714	16292	39325	36194	28065	1.11864	2.23767	1.162	up
		pmb0666	C38H40O19	6-C-Hexosyl-apigenin O-sinapoylhexoside	5114.1	6983.8	5668	21719	15480	20781	1.14005	3.26356	1.70644	up
Lignans and Coumarins		mws1075	C10H8O3	7-Methoxycoumarin	9	9	9	91796	83416	63847	1.17091	8854.04	13.1121	up
		pmb0382	C19H14O6	O-Feruloyl 4-hydroxylcoumarin	263320	296500	264840	140250	87721	65500	1.07866	0.355869	-1.49058	down
		pmb3093	C16H16O9	6,7-dihydroxycoumarin 7-O-quinic acid	585290	590300	613190	207100	208700	181790	1.16676	0.334077	-1.58175	down
		pmn001494	C22H26O8	(+)-Syringaresinol	6238.2	5361.6	4984.9	33799	35215	33330	1.1683	6.17099	2.6255	up
		pmn001378	C26H32O11	Terpineol monO-glucoside	741410	789900	738410	352020	270840	307750	1.15244	0.410011	-1.28627	down
		Rfmb25703	C26H32O11	Pinoresinol-Hexose	777150	818080	825320	359310	361670	363790	1.17009	0.44815	-1.15795	down
		pmn001375	C26H32O12	1-Hydroxyterpinin monO-glucoside	267010	240900	276480	81743	90463	89445	1.16657	0.333573	-1.58393	down
		Rfmb056	C29H36O13	(+)-Medioresinol-acetylglucoside	6823.1	12563	13494	33514	37336	33486	1.09778	3.17323	1.66595	up
		Rfmb26201	C30H38O14	Syringaresinol-aceGlu	14231	17684	15266	310120	321890	282600	1.16975	19.3851	4.27688	up
		pmn001370	C32H42O16	Pinoresinol diglucoside	1916000	1985600	1837000	441690	443710	489490	1.16925	0.239586	-2.06138	down
		pmn001369	C32H42O17	1-Hydroxypineolin Diglucoside	73916	68973	65597	33828	26139	29832	1.14833	0.43072	-1.21518	down
Alkaloids		pmb1096	C8H7N	Indole	14498	11147	13808	63376	55354	55682	1.16244	4.42075	2.14429	up
		mws0191	C5H11NO2	Betaine	1951800	1769400	2246200	7186800	9592700	7919300	1.15625	4.13895	2.04927	up
		pmp001287	C8H9N	N-Benzylmethylene isomethylamine	2287200	2486200	2409300	20160000	19081000	17567000	1.17011	7.909	2.9835	up
		pma3649	C5H9NO3	5-Aminolevulinate	5206700	7939200	6892200	22306000	20386000	20404000	1.14379	3.1488	1.6548	up
		pmb0374	C5H5N5	Aminopurine	139360	160900	146230	62751	64975	59171	1.16317	0.418592	-1.25638	down
		pme2268	C7H7NO2	Trigonelline	3630500	4204200	3547400	1640800	1584500	1494100	1.15957	0.414634	-1.27009	down
		mws0146	C7H7NO2	Nicotinic Acid Methyl Ester(Methyl Nicotinate)	9	9	9	7482	9297.5	7028	1.17073	881.759	9.78424	up
		mws0103	C9H7NO	Indole-3-carboxaldehyde	43769	42491	52104	120460	118110	98426	1.14723	2.43558	1.28426	up
		mws0017	C7H19N3	Spermidine	581230	828860	441210	139790	81038	103030	1.12615	0.174935	-2.51511	down
		pmb0819	C10H8N2	3-Indoleacetonitrile	207020	203120	200760	724280	690710	712430	1.1709	3.48244	1.8001	up
		mws0005	C10H12N2	Tryptamine	251860	292800	272720	2215100	1834400	1626000	1.16545	6.94353	2.79567	up
		mws1417	C9H7NO2	Indole-3-carboxylic acid	78873	79554	75322	233900	219580	225020	1.17027	2.90269	1.53739	up
		mws0102	C9H7NO2	Indole-5-carboxylic acid	47468	58767	58892	133600	123540	133420	1.15288	2.36521	1.24197	up
		mws1346	C6H11NO4	DL-2-Aminoadipic acid	95518	129550	81964	483840	471880	415310	1.15209	4.46543	2.1588	up
		pme2024	C10H12N2O	Serotonin	219630	281970	219790	1596500	1318000	1210600	1.16169	5.71827	2.51558	up
		pmb0818	C11H11NO3	Methoxyindoleacetic acid	427980	503510	426260	1658800	1614300	1472800	1.16536	3.49542	1.80546	up
		mws0677	C12H14N2O2	N-Acetyl-5-hydroxytryptamine	102050	126520	99203	285570	264030	271360	1.15483	2.50466	1.32461	up
		pmb0896	C14H20N2O3	N'-Feruloyl putrescine	133220	134940	119220	33845	27049	24873	1.1599	0.221403	-2.17525	down
		mws1433	C18H19NO4	N-Feruloyltyramine	9	9	9	16983	13515	12510	1.17092	1592.89	10.6374	up
		pmb0776	C20H20N2O3	N-Feruloyl tryptamine	9	9	9	52386	45924	42829	1.1711	5227.37	12.3519	up
		pmb0770	C20H20N2O4	N-Feruloyl serotonin	9	5607	9	496850	485120	443430	1.05261	253.404	7.9853	up
		pmb0892	C16H23N5O6	Trans-Zeatin-O-Glucoside	136660	133440	130140	69527	61177	54041	1.14911	0.461586	-1.11533	down
		pmb0782	C5H11N	Piperidine	1889800	1919100	1853100	5943000	4885600	4501400	1.15614	2.70752	1.43697	up
Terpenoids		pmn001505	C41H64O13	Oleanolic acid-3-O-β-D-pyran xylose(1→3)-β-D-pyran glucuronide	25391	23731	25421	8503	12617	11209	1.12922	0.433696	-1.20524	down
Organic acids		mws0574	C4H8O3	α-Hydroxyisobutyric acid	16167	15854	23433	7787.3	6700.5	10654	1.0626	0.453381	-1.1412	down
		pme2049	C4H8O3	2-Hydroxybutanoic acid	56955	56681	62649	29560	29063	25800	1.15899	0.478901	-1.0622	down
		mws0671	C4H9NO3	L-Homoserine	1551700	1396100	1879300	177690	414740	384780	1.11016	0.202442	-2.30442	down
		pme0274	C6H13NO2	6-Aminocaproic acid	153740	276880	264830	653450	672290	623340	1.10137	2.80262	1.48677	up
		pme0243	C5H8O4	Glutaric acid	41323	42558	54534	180290	144140	148190	1.15159	3.41451	1.77168	up
		mws0336	C6H6N2O2	UROCANIC ACID(RG)	96325	92549	102440	24392	33884	33510	1.15165	0.315076	-1.66623	down
		pme3207	C6H6O4	Trans,trans-Muconic acid	6339800	5923100	6096500	10858000	12668000	13654000	1.14719	2.02512	1.01801	up
		pme0295	C6H11NO3	4-Acetamidobutyric acid	73486	75081	81977	321360	295230	256140	1.16406	3.78552	1.92049	up
		pme2380	C5H6O5	A-Ketoglutaric acid	1269900	1295100	1383400	507540	467000	465760	1.1678	0.364781	-1.4549	down
		mws0924	C6H10O4	2-Methylglutaric acid	68550	64398	83604	196820	182110	181120	1.15296	2.58621	1.37084	up
		pme3154	C6H12O4	(Rs)-Mevalonic acid	9	9	9	108380	96610	75062	1.17093	10372.3	13.3404	up
		pme3186	C3H7O6P	DL-Glyceraldehyde 3-phosphate	20073	19549	15090	47163	47309	39101	1.13902	2.44138	1.2877	up
		pme3009	C6H6O6	Trans-Citridic acid	1492700	1348600	1303400	335920	345290	331190	1.16868	0.244264	-2.03349	down
		pme2550	C6H6O6	Cis-Aconitic acid	471850	517810	650010	135510	147620	143910	1.15989	0.260443	-1.94096	down
		mws0154	C7H10O5	Shikimic acid	1530600	1414300	1302400	520320	422230	401440	1.15511	0.316434	-1.66002	down
		mws0281	C6H8O7	Citric Acid	5094700	5353700	5501600	12707000	13017000	12623000	1.16899	2.4042	1.26556	up
		mws0277	C7H12O6	Kinic acid	2540100	2635400	2393900	7697100	8060200	8045600	1.1695	3.14462	1.65289	up
		mws1189	C6H10O7	D-Galacturonic acid(Gal A)	14387	17667	19268	6689.8	10272	6756.1	1.08096	0.462139	-1.1136	down
		mws2125	C3H4KO6P	Phosphoenolpyruvic acid	92529	46812	65769	13577	8357.4	10271	1.1315	0.157015	-2.67102	down
Lipids		pmb0889	C18H30O2	Punicic acid	87369	93496	86187	214810	211730	189560	1.16451	2.30704	1.20604	up
		pmb2786	C18H30O3	9-HOTrE	26404	29170	26469	161930	149120	139050	1.16913	5.48615	2.45579	up
		Rfmb090	C18H32O3	13-Hydroxy-9,11-octadecadienoic acid	57911	61667	60182	134880	118600	108420	1.15167	2.01324	1.00952	up
		pmb2778	C18H32O3	9,10-EODE	145960	155130	157590	415050	383260	352340	1.1638	2.50861	1.32689	up
		pmn001610	C20H36O2	Eicosadienoic acid	17932	12363	13601	37074	31995	29793	1.11897	2.25219	1.17133	up
		pmb2804	C18H32O4	13-HPODE	6246.9	5095.9	6773.2	14301	13206	12517	1.14003	2.20932	1.1436	up
		pmn001689	C18H32O4	9-Hydroxy-12-oxo-10-octadecenoic acid	6402.8	7545.8	6912.4	78151	68595	62402	1.1686	10.0258	3.32564	up
		Rfmb089	C18H34O4	9,10-Dihydroxy-12-octadecenoic acid	27150	31273	32007	13791	12478	11210	1.15261	0.414453	-1.27072	down
		pmn001694	C18H34O5	9,10,13-Trihyroxy-11-octadecadienoic acid	38604	44141	41986	103680	89530	89710	1.15835	2.26824	1.18157	up
		pmn001495	C19H38O4	Hexadecanoic acid 2,3-dihydroxypropyl ester	46684	48505	48916	112450	103220	99751	1.1659	2.18883	1.13016	up
		pmb0890	C21H38O4	MAG(18:2)	273220	268610	228950	76281	70247	67578	1.16379	0.277778	-1.84799	down
		pmb0164	C21H38O4	MAG(18:2)isomer1	1369.3	1073.1	978.95	4845.1	6784	5554.3	1.15408	5.0224	2.32838	up
		pmb2363	C21H40O4	MAG(18:1)isomer1	63737	60905	60159	10881	10863	9727.7	1.1696	0.1703	-2.55385	down
		pmb0864	C19H40NO7P	LysoPE 14:0	31194	35431	32036	81451	80023	69137	1.15839	2.33741	1.22491	up
		pmb0862	C20H42NO7P	LysoPC 12:0	9947.7	10545	12485	43241	35601	35903	1.15812	3.47947	1.79887	up
		pmd0130	C22H46NO7P	LysoPC 14:0(2n isomer)	16775	18585	17909	51306	47536	49404	1.16817	2.78297	1.47663	up
		pmb2319	C23H48NO7P	LysoPC 15:0	75973	80673	77467	851290	781480	726230	1.17032	10.0763	3.3329	up
		pmp001270	C24H48NO7P	LysoPC(16:1)	93238	101620	107110	259670	206490	172900	1.11079	2.11632	1.08156	up
		pmb2406	C25H52NO7P	LysoPC 17:0	17020	17549	16810	63196	58206	59489	1.17033	3.52072	1.81587	up
		pmc0960	C28H50NO7P	LysoPC 20:4	326340	314500	322800	141930	138390	121880	1.16358	0.417376	-1.26058	down
		pmd0147	C28H54NO7P	LysoPC 20:2	50402	80324	73940	20294	27475	15492	1.09861	0.309094	-1.69388	down
		pmd0143	C28H58NO7P	LysoPC 20:0	4074.5	3738.9	4461.7	35767	33759	31883	1.16906	8.26136	3.04638	up
Others		mws4052	C4H7NO2	1-Aminocyclopropane-1-carboxylic acid	92331	85858	96943	5928.6	22870	15200	1.08724	0.159918	-2.64459	down
		pme2433	C4H11NO2	Diethanolamine	67894	41615	13842	7521.8	4223.4	2977.2	1.0259	0.119354	-3.06668	down
		mws0601	C5H5NO2	Pyrrole-2-carboxylic acid	6467.2	5603.7	8372.7	22217	21846	18591	1.14014	3.06472	1.61576	up
		pmb0069	C7H7NO	Benzamide	8107.9	9891.6	10082	4325100	4382400	4115000	1.17071	456.617	8.83484	up
		mws0491	C8H11N	Phenethylamine	32003	28589	35663	16854000	13669000	12463000	1.17042	446.585	8.80279	up
		mws0133	C6H6N2O	Nicotinamide	581300	596480	560310	180750	162690	143240	1.16342	0.280009	-1.83646	down
		pme2828	C6H5NO3	4-Nitrophenol	46523000	43582000	43866000	10561000	9153300	9508400	1.16843	0.218127	-2.19676	down
		mws0704	C2H8NO4P	O-Phosphorylethanolamine	14067	13952	19648	4138.6	4141.5	6105.9	1.12827	0.301802	-1.72833	down
		pme3351	C6H11NO3	Allysine(6-Oxo DL-Norleucine)	5522.8	8364.1	7753.8	24340	19021	22299	1.13284	3.0341	1.60127	up
		pme3081	C8H12N2O2	4-(Aminomethyl)-5-(hydroxymethyl)-2-methylpyridin-3-ol	80456	88464	57019	34631	24232	27564	1.1006	0.382524	-1.38638	down
		Hmfn00531	C6H8O6	L-Ascorbic acid	28830000	31016000	30407000	13625000	11808000	11377000	1.16047	0.407853	-1.29388	down
		pmb0774	C10H12N2O	N-Hydroxy tryptamine	258290	316270	288190	1810600	1548800	1322900	1.16224	5.42718	2.4402	up
		mws4170	C6H12O6	D-Glucose	326860	316670	341180	75755	71049	91107	1.16472	0.241605	-2.04928	down
		pme3705	C6H10O7	D-Glucoronic acid	14661	20064	19410	10038	9564.7	5471.3	1.02512	0.463175	-1.11037	down
		Hmln002597	C10H9NaO4	Sodium ferulate	9	9	9	7983.3	9460.1	10201	1.17074	1023.87	9.99981	up
		mws4174	C8H15NO6	N-Acetyl-β-D-mannosamine	61425	69677	57024	8842.8	4969.3	8897.4	1.15022	0.120714	-3.05033	down
		pmf0218	C3H2Na3O6P	Trisodium Phosphoenolpyruvate	51646	53836	59135	12326	11198	13226	1.16748	0.223245	-2.1633	down
		pma3101	C11H14NO6+	Nicotinate D-ribonucleoside	1113900	1326500	1047700	648160	495910	471210	1.11499	0.463083	-1.11066	down
		pme3472	C12H16O7	Arbutin	107000	120360	104690	52706	56888	48952	1.15474	0.477476	-1.0665	down
		mws1038	C11H22N2O4S	(R)-Pantetheine	127170	145780	146800	42050	37595	36123	1.16505	0.275802	-1.85829	down
		pmb3081	C6H11PO11	Glucarate O-Phosphoric acid	883960	1045500	714090	2002300	1657000	2113800	1.11178	2.18384	1.12687	up
		Zmhn001375	C14H18O9	Vanillic acid-C-glucoside	794080	853040	884010	97447	83982	85242	1.16955	0.105357	-3.24665	down
		mws5040	C12H21O11Na	Turanose	1107500	1230200	1413900	10310000	7552400	7900900	1.16218	6.86728	2.77974	up
		pmb0064	C15H19NO10	DIMBOA glucoside	32184	27591	26654	94172	74393	78389	1.15486	2.8573	1.51465	up
		mws0232	C17H20N4O6	Riboflavin	925410	820220	805270	293720	246890	210330	1.1529	0.294382	-1.76424	down
		pma6625	C20H22O9	E-3,4,5'-Trihydroxy-3'-glucopyranosylstilbene	159930	181990	181940	9	9	9	1.17112	5.15405e-05	-14.2439	down
		pme0500	C18H32O16	D-(+)-Melezitose	14739	27574	37395	5383.6	5194.4	4038.3	1.1057	0.183373	-2.44715	down
		mws1589	C18H32O16	Panose	44032	56992	42188	22946	19257	20072	1.13152	0.434845	-1.20143	down
		pmb2653	C24H42O20	D(+)-Melezitose O-rhamnoside	51502	67330	73082	13390	9514.2	7555.4	1.14519	0.158715	-2.65549	down
		mws4163	C24H42O21	1,1-Kestotetraose	6482.4	6543.8	4755.4	9	9	9	1.17027	0.00151842	-9.36321	down
		mws1593	C24H42O21	Maltotetraose	3379	7164.8	5222.2	9	9	9	1.16843	0.00171255	-9.18964	down
		pme3005	C3H7NO	N,N-Dimethylformamide	103620	87217	96393	54427	44394	41530	1.13069	0.488636	-1.03317	down
