# Supplementary figures and images for: Metabolome and Transcriptome Analyses Reveal the Differences in the Molecular Mechanisms of Oat Leaves Responding to Salt and Alkali Stress Conditions
Source: MDPI journal article supplement (doi:10.3390/agronomy13061441), 2023-05-23

Supplementary figure S1

GO Enrichment top50

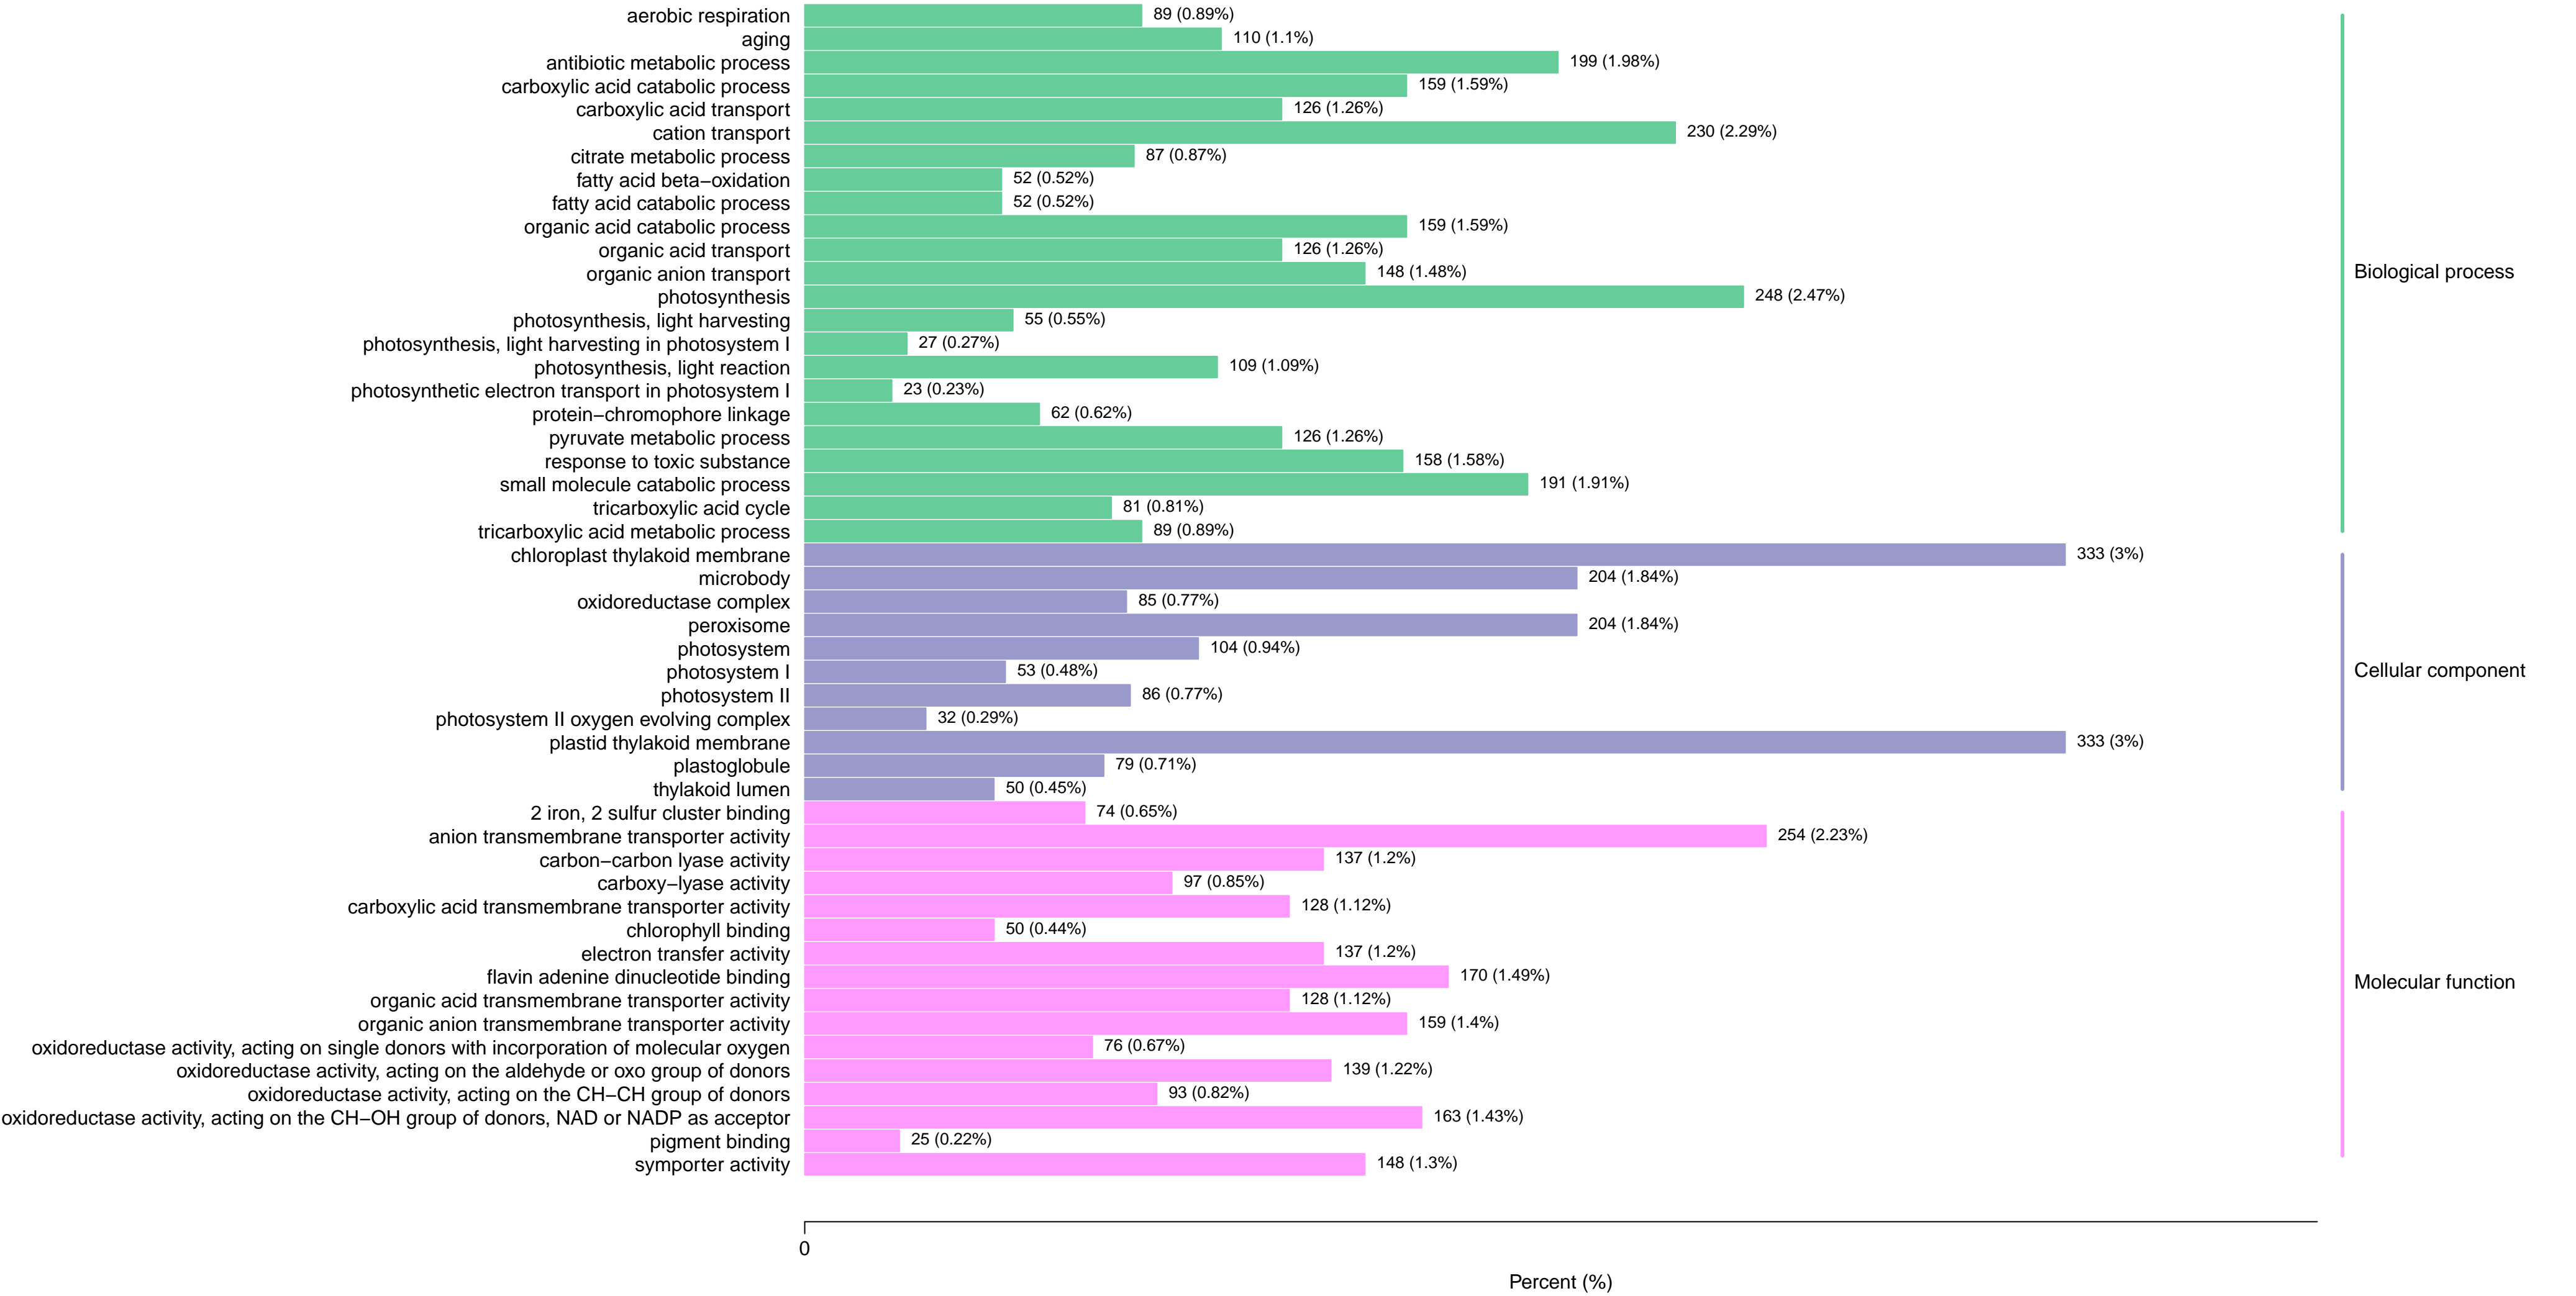

Supplement: s1 [file s1 › Supplementary Figure S1.pdf]

## Statistics of KEGG Enrichment

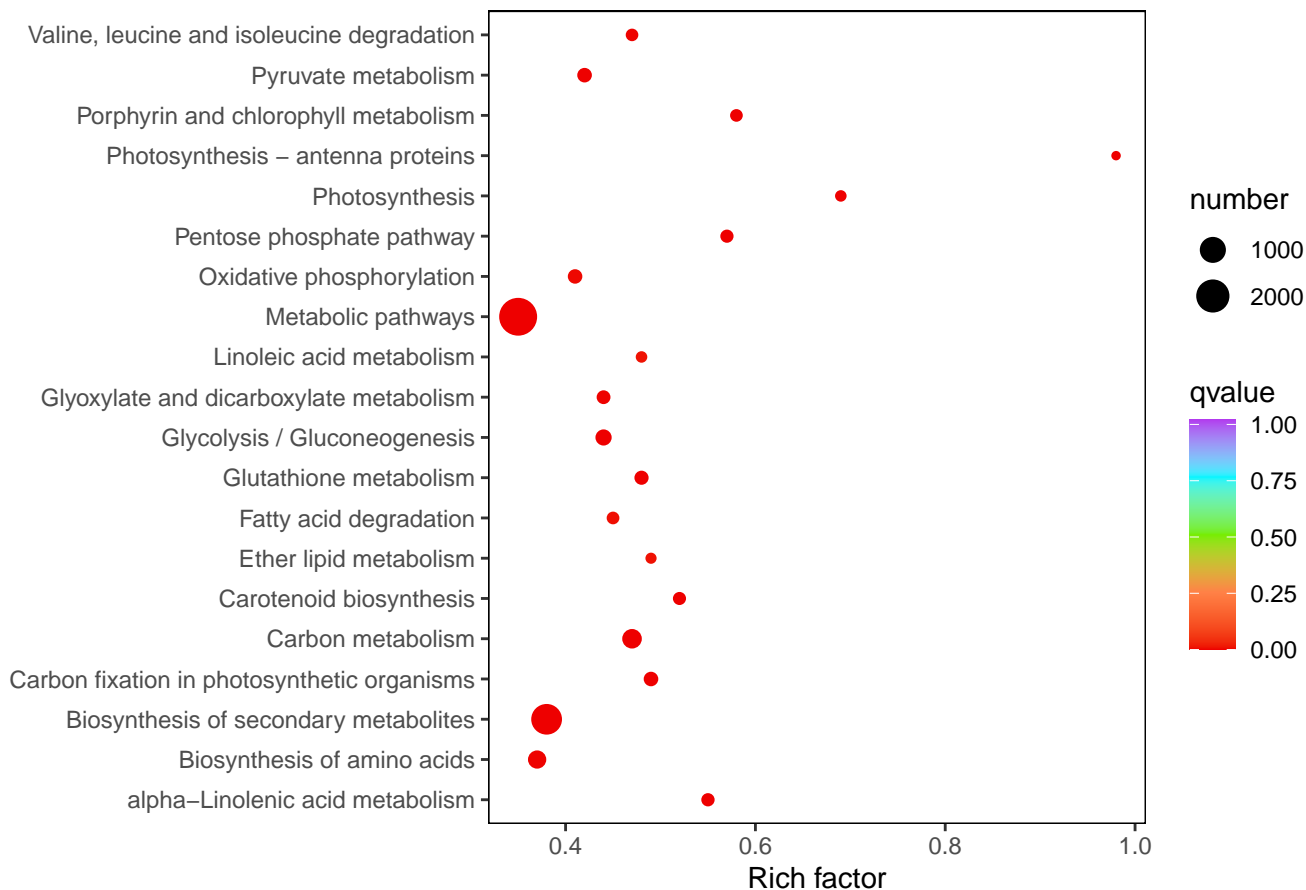

Supplement: s1 [file s1 › Supplementary Figure S2.pdf]

Supplementary figure S3

GO Enrichment top50

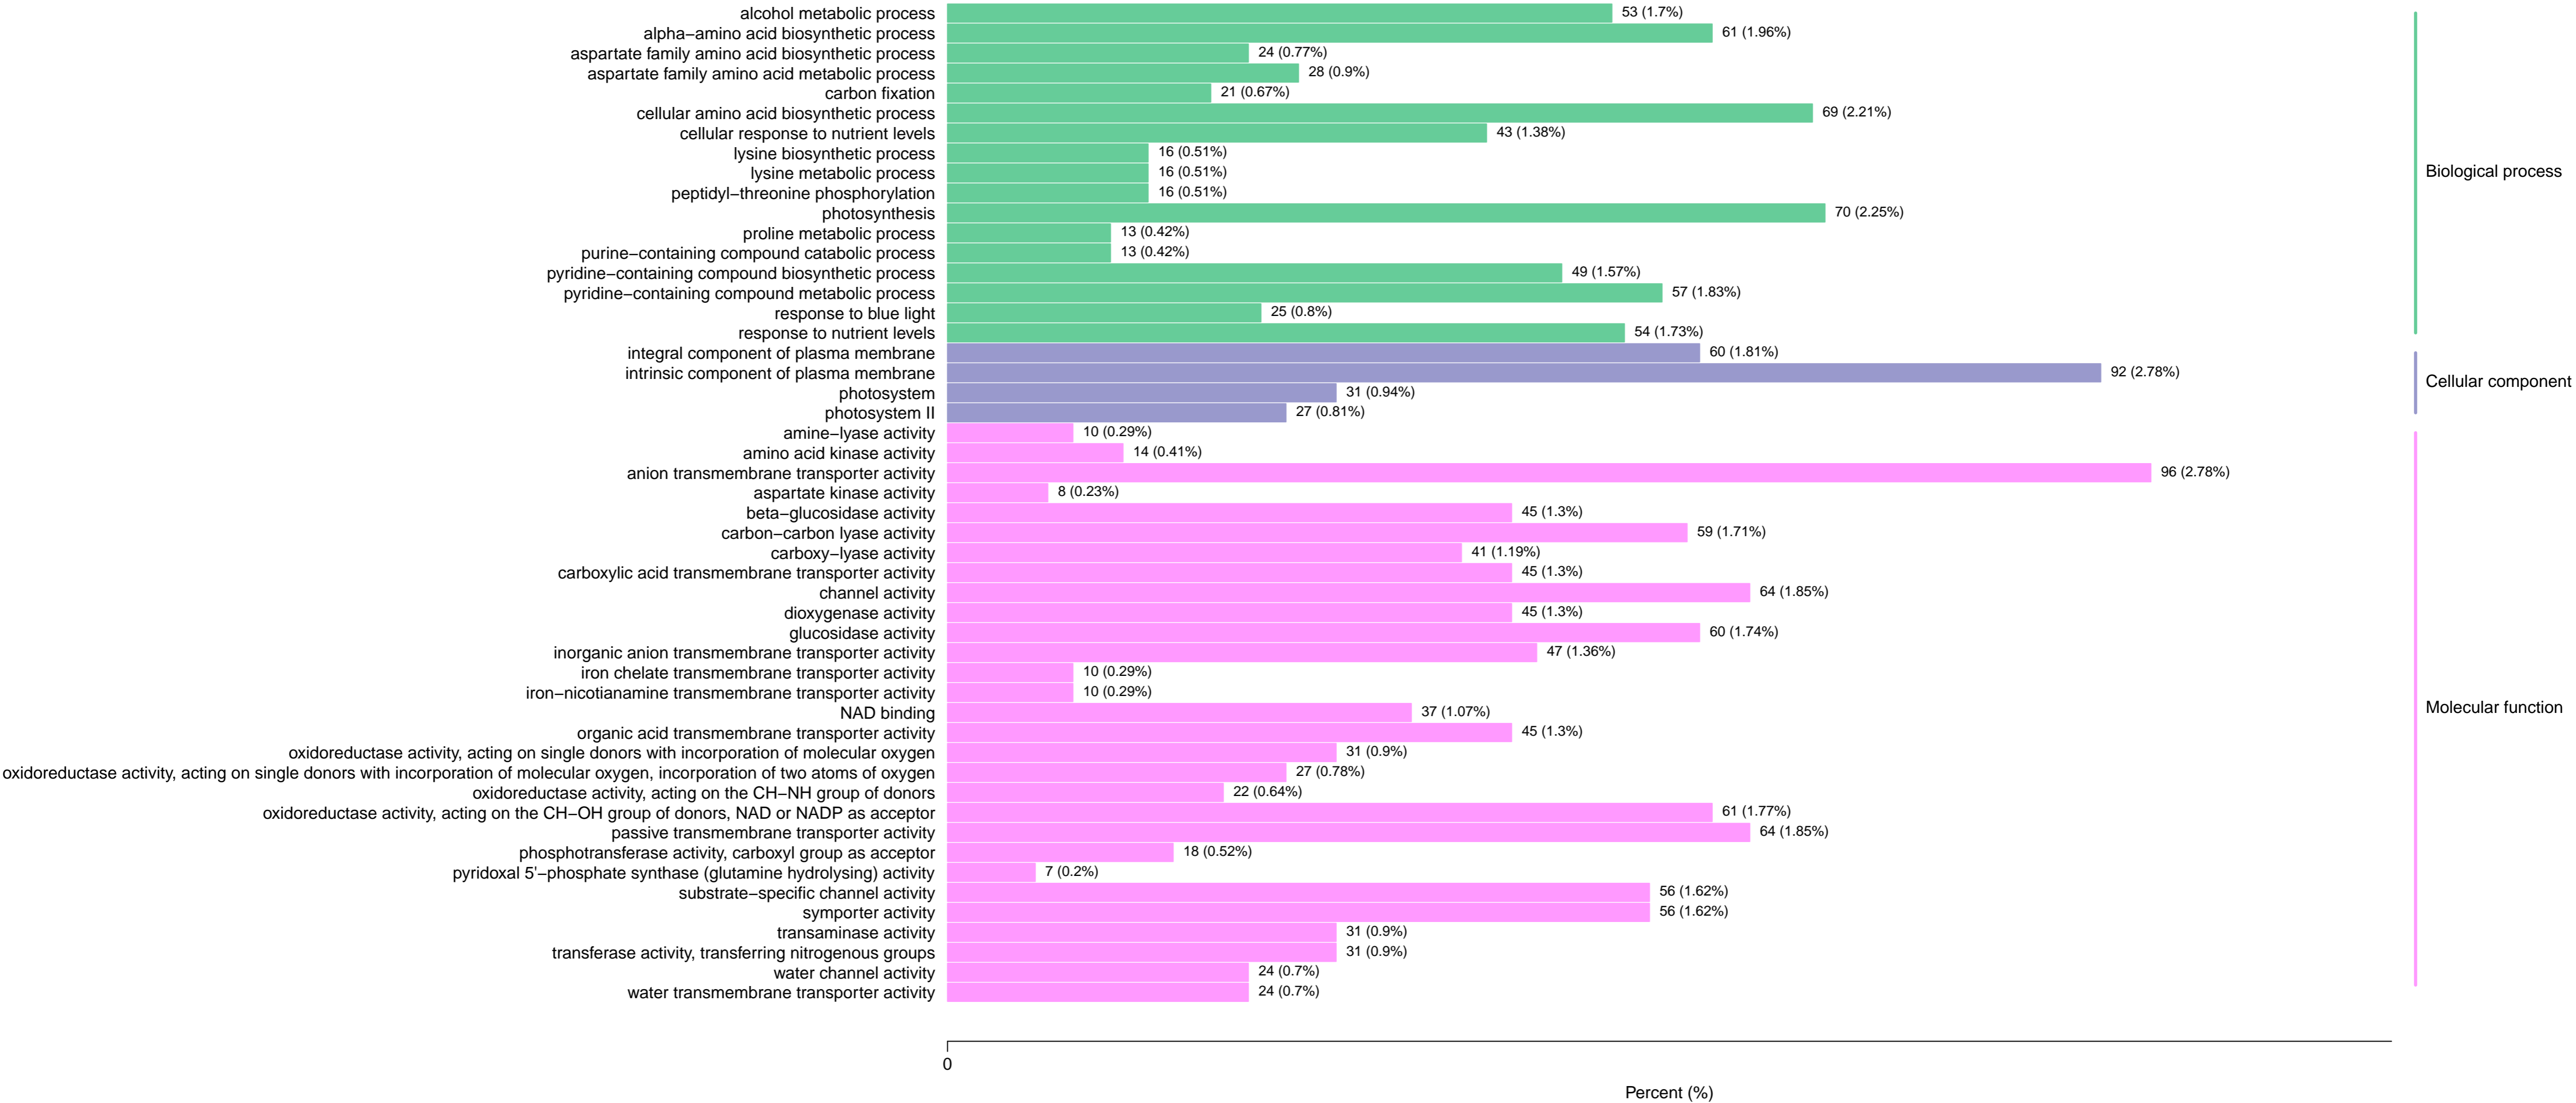

Supplement: s1 [file s1 › Supplementary Figure S3.pdf]

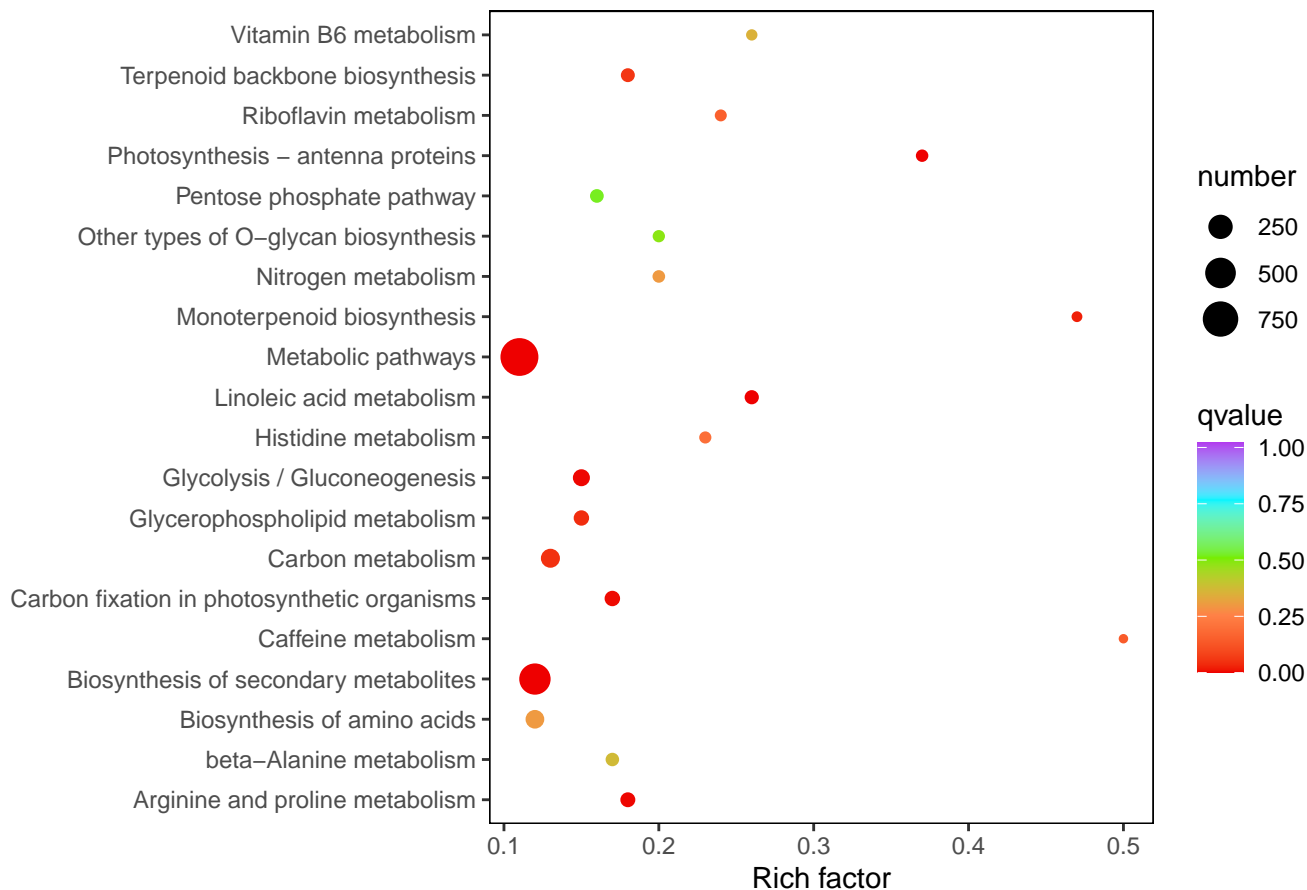

Supplement: s1 [file s1 › Supplementary Figure S4.pdf]

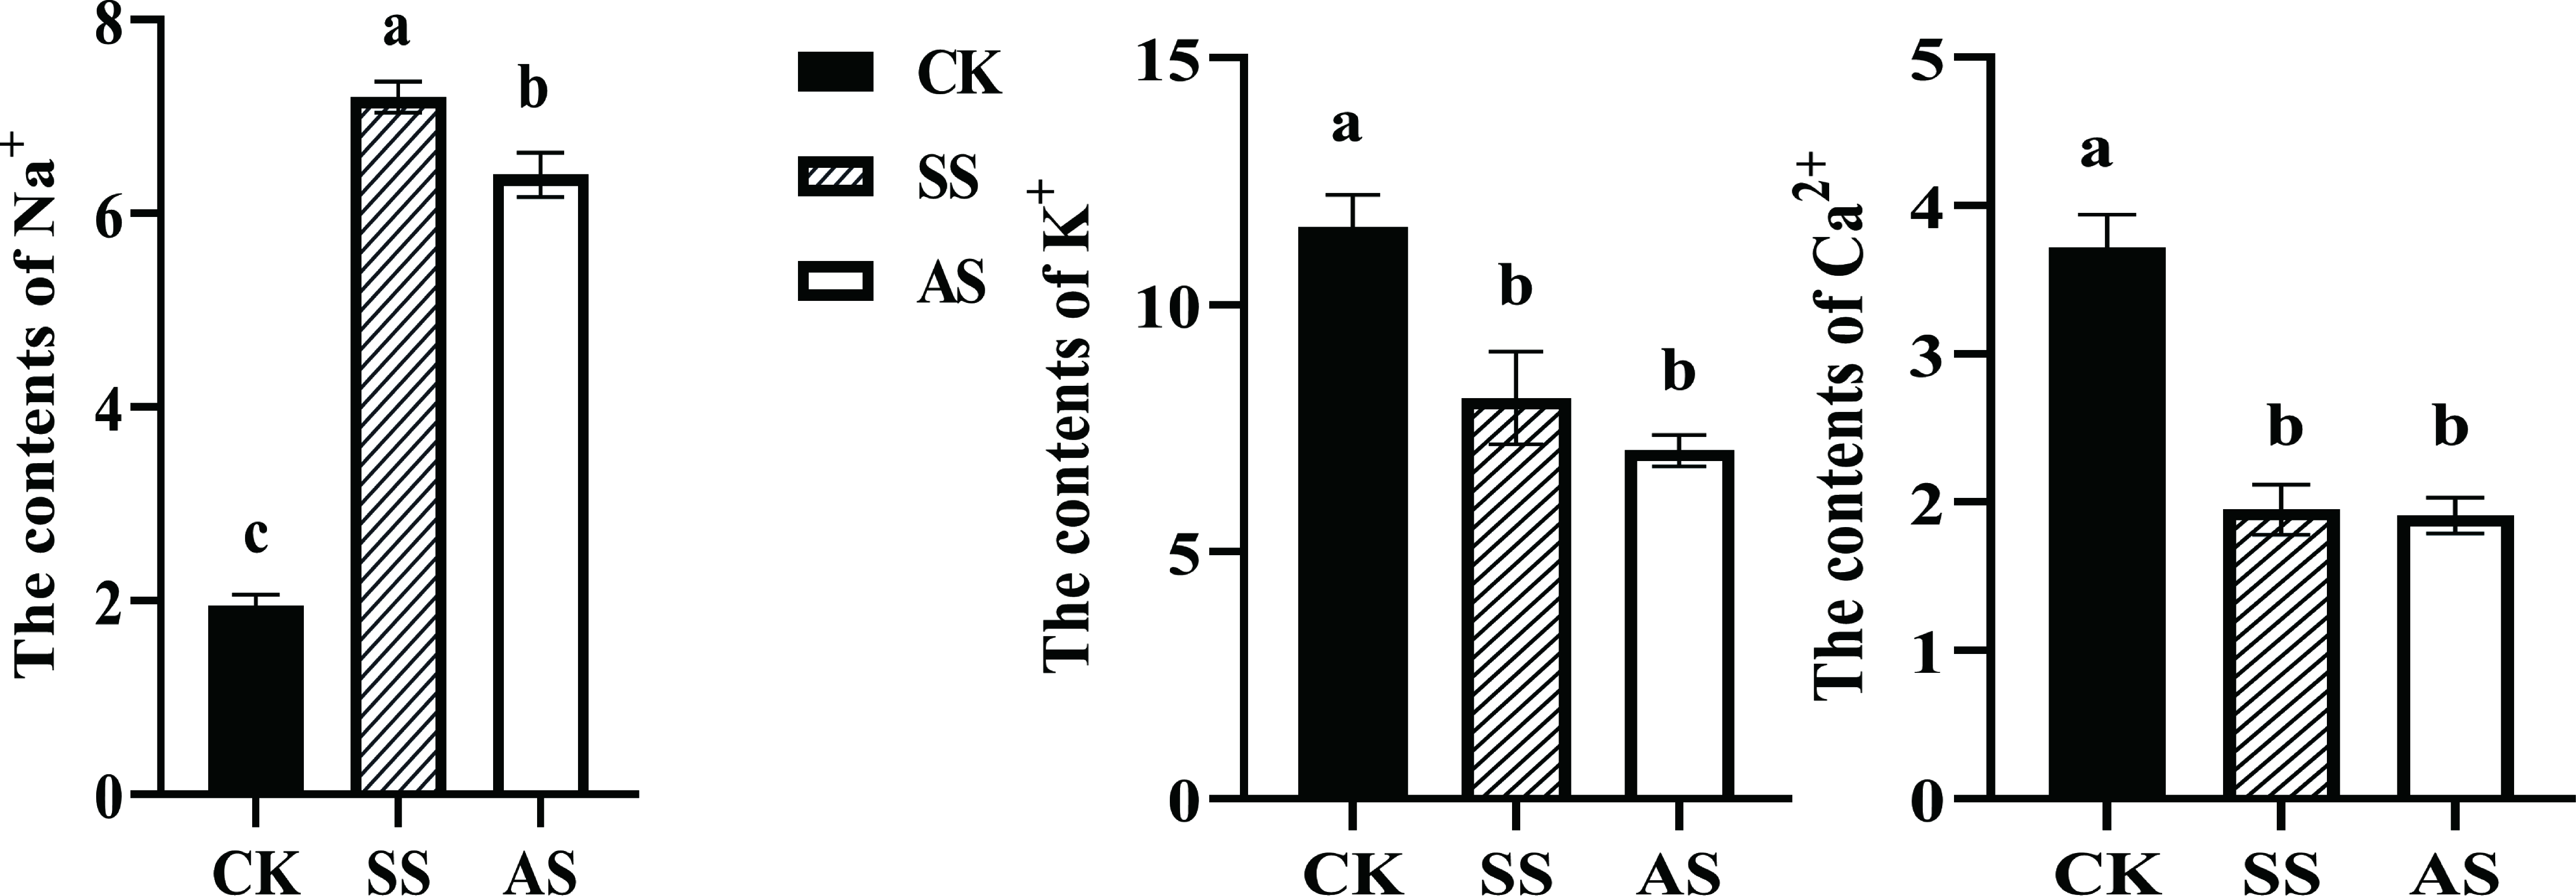

Supplement: s1 [file s1 › Supplementary Figure S5.tif]

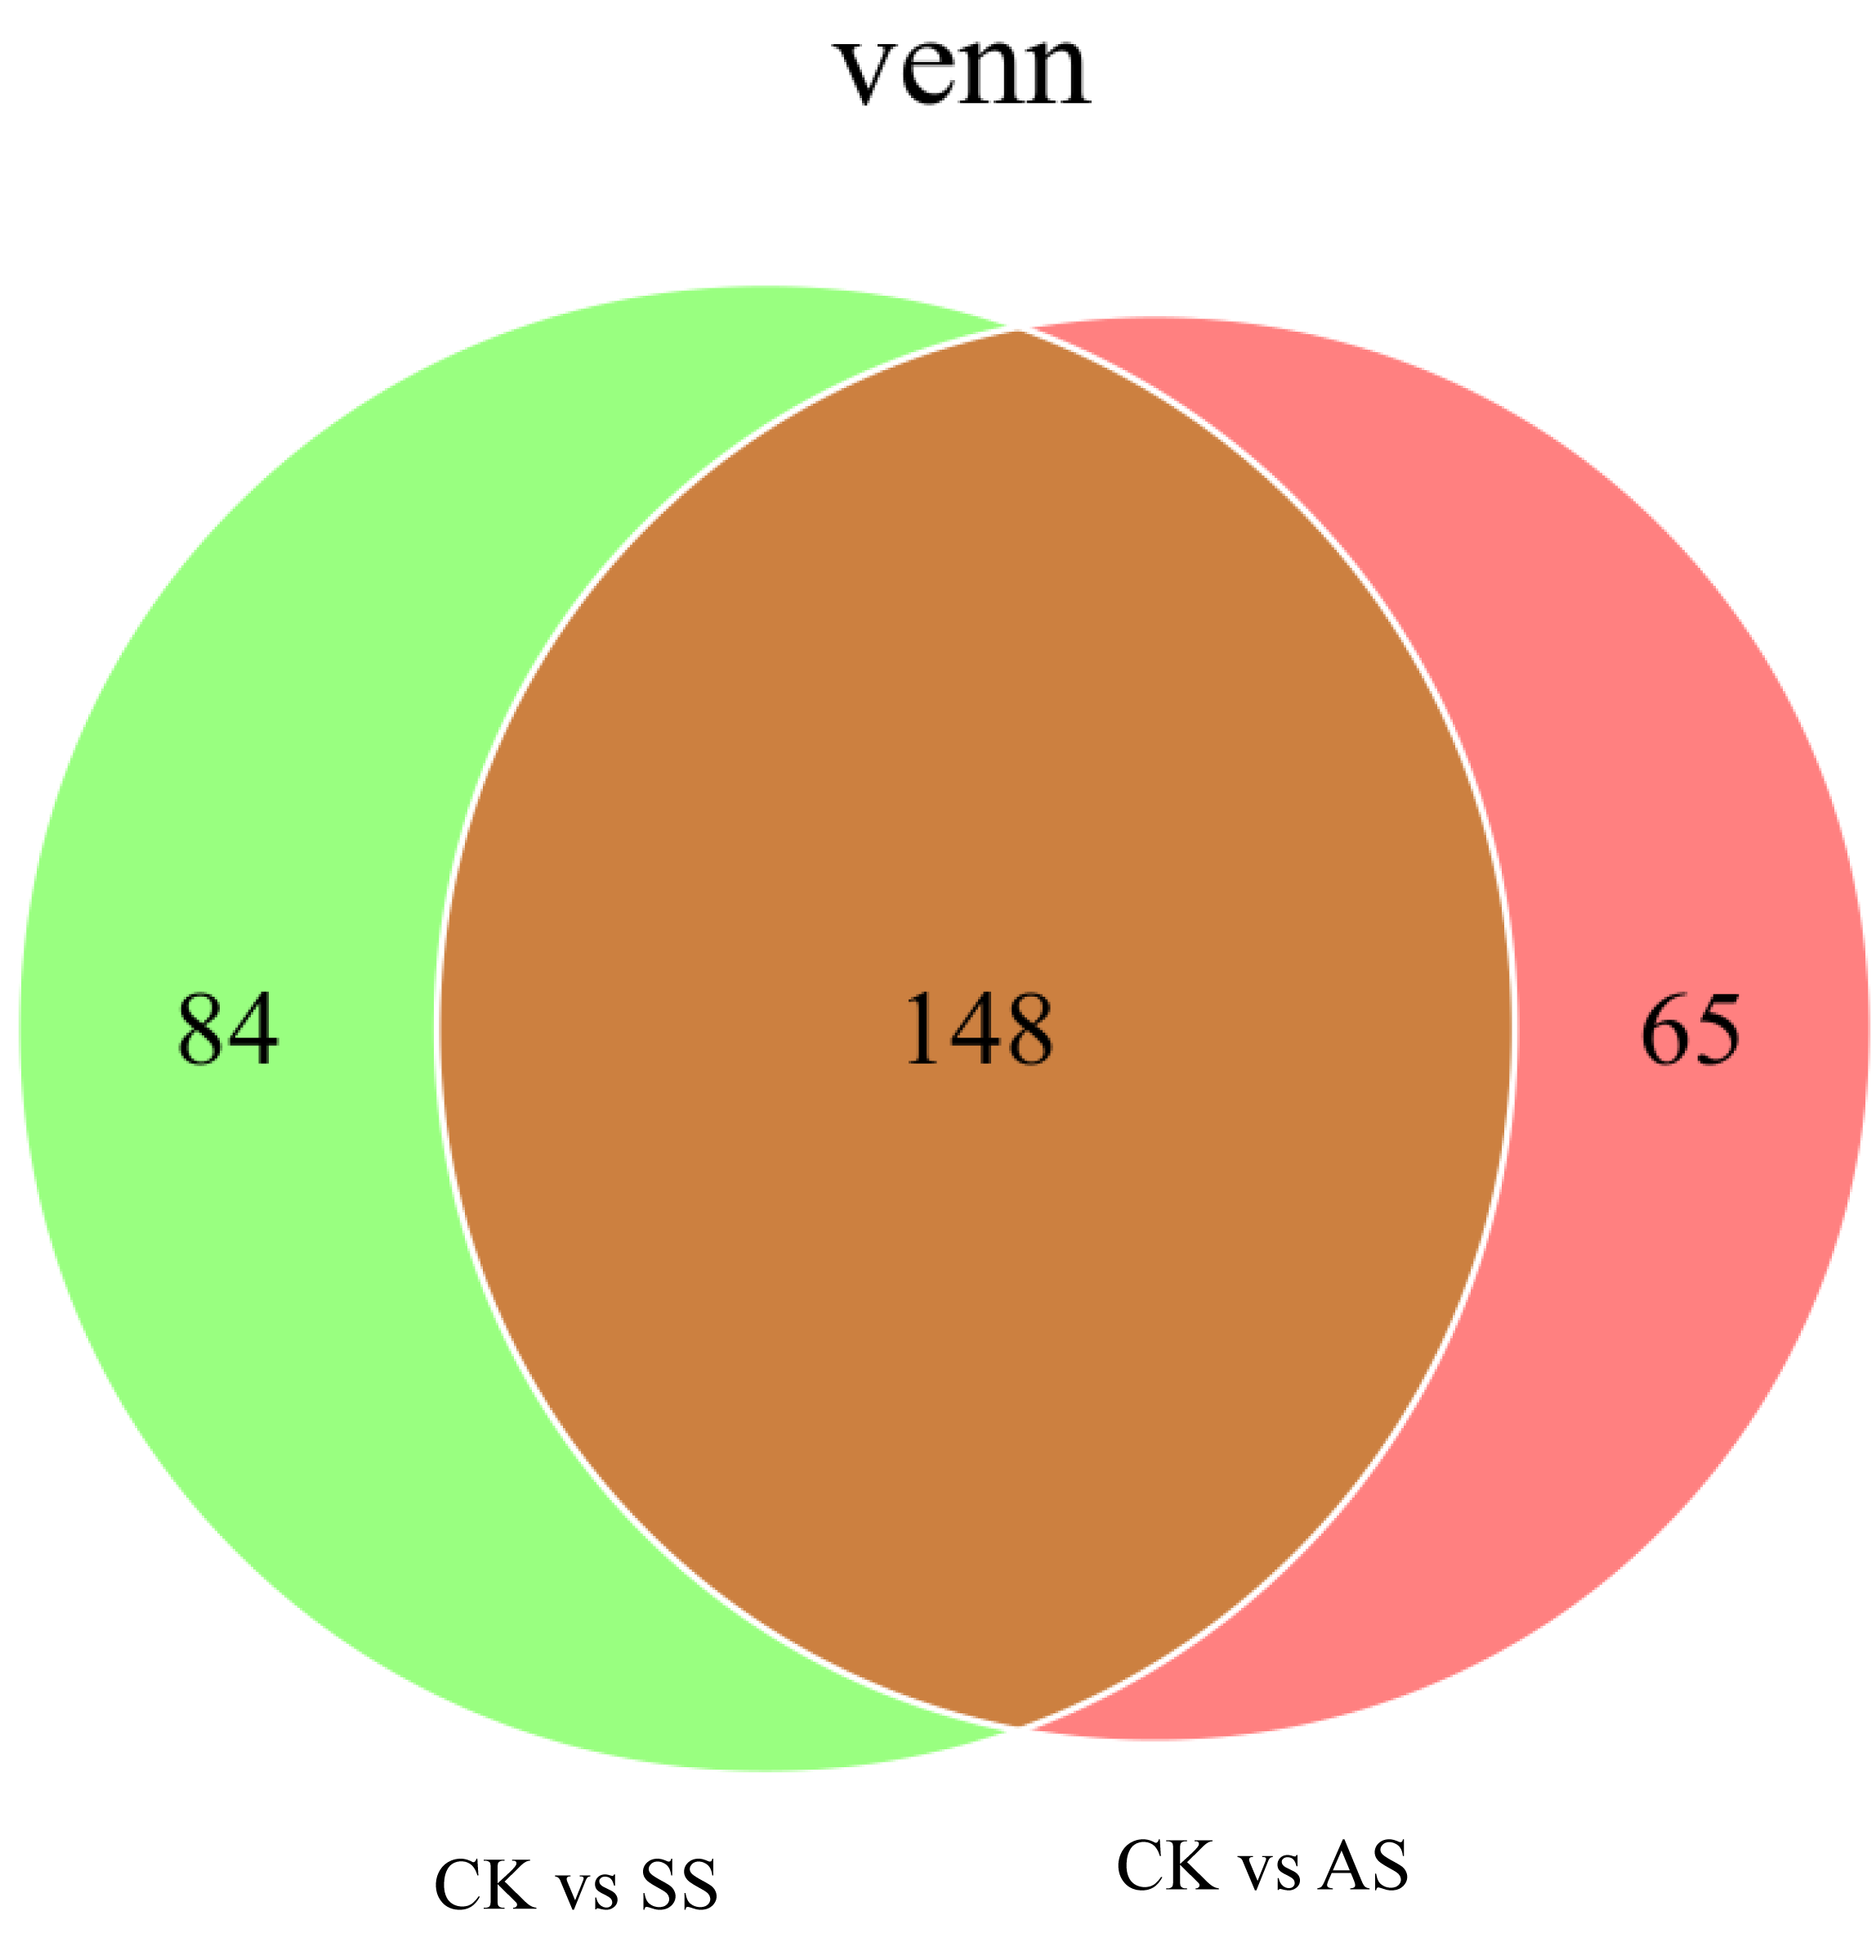

Supplement: s1 [file s1 › Supplementary Figure S6.tif]
